# Supplementary material for: Photocatalytic, modular difunctionalization of alkenes enabled by ligand-to-metal charge transfer and radical ligand transfer
Source: Royal Society of Chemistry journal article supplement (doi:10.1039/d3sc05231a), 2023-11-24
Supplement: d3sc05231a1.pdf [file d3sc05231a1.pdf]

# Photocatalytic, Modular Difunctionalization of Alkenes Enabled by Ligand-to-Metal Charge Transfer and Radical Ligand Transfer

Kang-Jie Bian, David Nemoto Jr., Xiao-Wei Chen, Shih-Chieh Kao, James Hooson and Julian G. West\*

Department of Chemistry, Rice University, 6500 Main St, Houston, TX-77005, USA.

## Contents

|                                                                                   |    |
|-----------------------------------------------------------------------------------|----|
| I. General Procedures for Substrate Synthesis .....                               | 3  |
| General Procedure 1 for the Synthesis of Unactivated Alkenes.....                 | 3  |
| General Procedure 2 for the Synthesis of Unactivated Alkenes.....                 | 3  |
| Procedure for the Synthesis of N-(but-3-en-1-yl)benzenesulfonamide .....          | 4  |
| Procedure for the Synthesis of N-(but-3-en-1-yl)-N-methylbenzenesulfonamide ..... | 4  |
| Procedure for the Synthesis of 2-(but-3-en-1-yl)isoindoline-1,3-dione .....       | 5  |
| II. Optimization of Conditions (Photocatalytic Diazidation) .....                 | 6  |
| 2.1 optimization of iron salts.....                                               | 6  |
| 2.2 optimization of the amount of oxidant .....                                   | 7  |
| 2.3 optimization of iron catalyst loading.....                                    | 7  |
| 2.4 optimization of wavelength.....                                               | 8  |
| 2.5 control experiments .....                                                     | 8  |
| III. Optimization of Conditions (Photocatalytic Dichlorination) .....             | 9  |
| 3.1 optimization of iron salts.....                                               | 9  |
| 3.2 control experiments .....                                                     | 10 |
| IV. Optimization of Conditions (Photocatalytic Fluoro-chlorination) .....         | 11 |
| 4.1 optimization of iron salts.....                                               | 11 |
| 4.2 optimization of catalyst loading .....                                        | 12 |
| 4.3 optimization of reactants loading (alkene) .....                              | 12 |
| 4.4 optimization of reactants loading (Selectfluor).....                          | 13 |
| V. Experimental Methods of Difunctionalization of Alkenes.....                    | 13 |
| VI. Preliminary Testing on Photocatalytic Fluoroazidation .....                   | 15 |
| VII. Characterization of Corresponding Products .....                             | 18 |

|                                           |     |
|-------------------------------------------|-----|
| VIII. NMR Spectrum for New Compounds..... | 48  |
| IX. References.....                       | 266 |

## General Information

All reagents were purchased from commercially available sources and used without further purification. All reactions were monitored by either  $^1\text{H}$  NMR or thin layer chromatography (TLC) carried out on 0.25 mm pre-coated silica plates (F-254) purchased from Silicycle, Quebec, Canada, using shortwave UV light as visualizing agent and  $\text{KMnO}_4$  or phosphomolybdic acid (PMA) as developing agents. Flash column chromatography was performed using SiliaFlash-P60 silica gel (40 – 63  $\mu\text{m}$ ) purchased from Silicycle, Quebec, Canada and preparatory thin-layer chromatography was purchased from Miles Scientific (GF 1000  $\mu\text{m}$ , 20 x 20 cm).  $^1\text{H}$ ,  $^{13}\text{C}$  and  $^{19}\text{F}$  NMR spectra were recorded on a Bruker DRX-600 spectrometers operating at 600 MHz for proton nuclei, 151 MHz for carbon nuclei and 565 MHz for fluorine nuclei were calibrated using residual undeuterated solvent as an internal reference ( $\text{CDCl}_3$ : 7.26 ppm  $^1\text{H}$  NMR and 77.00 ppm  $^{13}\text{C}$  NMR). 25 W PR160L 427 nm LEDs from Kessil Lights were used as light source. For reporting NMR peak multiplicities, the following abbreviations were used: s = singlet, d = doublet, t = triplet, q = quartet, quin = quintet, hept = heptet, m = multiplet. High-resolution mass spectra (HRMS) were recorded on an Agilent UHPLC TOF mass spectrometer using electrospray ionization time-of-flight (ESI-TOF), chemical ionization time-of-flight (CI-TOF) or atmospheric pressure chemical ionization (APCI).

# I. General Procedures for Substrate Synthesis

## General Procedure 1 for the Synthesis of Unactivated Alkenes

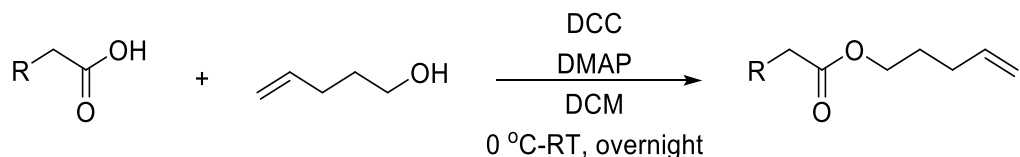

To an RB flask were added 5-pentenol (4.9 mmol, 1.96 equiv), carboxylic acid (2.5 mmol, 1.0 equiv), 4-dimethylamino pyridine (0.24 mmol, 0.097 equiv), and a stir bar. The RB flask was then evacuated and backfilled with nitrogen gas three times. Dry dichloromethane (0.225 M) was added via syringe to the RB flask, dissolving the solid components. The RB flask was then placed in an ice bath positioned on top of a stirring plate. Dicyclohexyl carbodiimide (4.85 mmol, 1.94 mmol) was added to the mixture via syringe dropwise over a period of 5 minutes. The ice bath was then removed, allowing the reaction to return to room temperature. The reaction was left to stir overnight. Following reaction, the mixture was concentrated through rotary evaporation. Subsequent flash column chromatography (hexanes/EtOAc) allowed for isolation of the ester.<sup>1-2</sup>

## General Procedure 2 for the Synthesis of Unactivated Alkenes

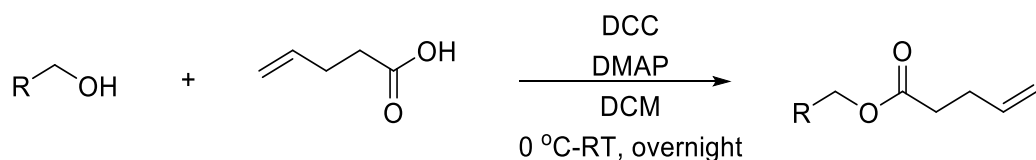

To an RB flask were added 5-pentenoic acid (2.5 mmol, 1.0 equiv), alcohol (4.9 mmol, 1.96 equiv), 4-dimethylamino pyridine (0.24 mmol, 0.097 equiv), and a stir bar. The RB flask was then evacuated and backfilled with nitrogen gas three times. Dry dichloromethane (0.225 M) was added via syringe to the RB flask, dissolving the solid components. The RB flask was then placed in an ice bath positioned on top of a stirring plate. Dicyclohexyl carbodiimide (4.85 mmol, 1.94 mmol) was added to the mixture via syringe dropwise over a period of 5 minutes. The ice bath was then removed, allowing the reaction to return to room temperature. The reaction was left to stir overnight. Following reaction, the mixture was concentrated through rotary

evaporation. Subsequent flash column chromatography (hexanes/EtOAc) allowed for isolation of the ester.<sup>1-2</sup>

### Procedure for the Synthesis of *N*-(but-3-en-1-yl)benzenesulfonamide

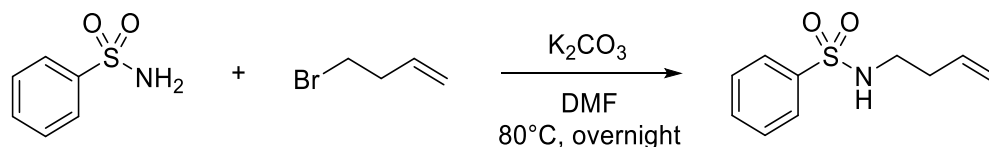

To an RB flask were added benzenesulfonamide (944 mg, 6.0 mmol), 4-bromobut-1-ene (0.8 mL, 6.0 mmol), dimethylformamide (30 mL), and a stir bar. Potassium carbonate (830 mg, 6.0 mmol) was added to the reaction mixture. After stirring overnight at  $80^\circ C$ , the mixture was cooled to room temperature and quenched with water. The reaction mixture was then washed with brine and extracted with diethyl ether. The organic layer was concentrated through rotary evaporation. Subsequent flash column chromatography (hexanes/EtOAc) (3:1) allowed for isolation of *N*-(but-3-en-1-yl)benzenesulfonamide.<sup>3</sup>

### Procedure for the Synthesis of *N*-(but-3-en-1-yl)-*N*-methylbenzenesulfonamide

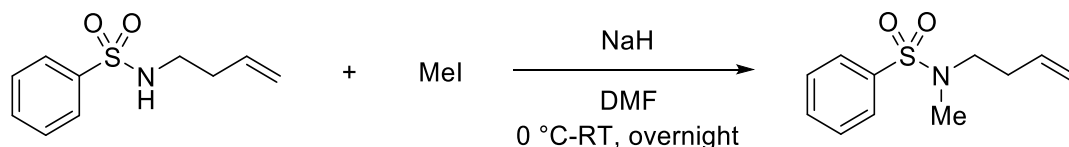

To an RB flask were added sodium hydride (60% in mineral oil, 240 mg, 6 mmol), dimethylformamide (25 mL), a solution of *N*-(but-3-en-1-yl)benzenesulfonamide (1.20 g, 5 mmol) in DMF (5 mL), and a stir bar in an ice bath at  $0^\circ C$ . The reaction mixture was brought to room temperature and stirred for 30 minutes. The reaction mixture was cooled to  $0^\circ C$  in an ice bath again, and a solution of methyl iodide (1.06 g, 7.5 mmol) in DMF (5 mL) was added dropwise over a period of 5 minutes by syringe. The reaction mixture was brought to room temperature and left to run overnight. The reaction mixture was quenched with a saturated aqueous solution of sodium bicarbonate. The mixture was then washed with brine and extracted with diethyl ether. The organic phase was dried over sodium sulfate and concentrated through rotary evaporation. Subsequent flash column chromatography (hexanes/EtOAc) (10:1) produced

*N*-(but-3-en-1-yl)-*N*-methylbenzenesulfonamide.<sup>4</sup>

### Procedure for the Synthesis of 2-(but-3-en-1-yl)isoindoline-1,3-dione

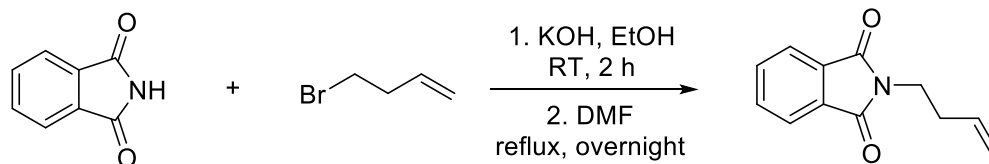

To an RB flask were added phthalimide (1.71 g, 11.6 mmol), potassium hydroxide (0.650 g, 11.6 mmol), ethyl alcohol (20 mL), and a stir bar. The reaction mixture was stirred at room temperature for 2 h and evaporated to remove EtOH. The resulting residue was then dissolved in dimethylformamide (15 mL) and 4-bromobut-1-ene (1.10 mL, 12.8 mmol) was added. The reaction mixture was stirred at reflux overnight. The reaction mixture was cooled, diluted with ethyl acetate, and quenched with saturated sodium bicarbonate. The mixture was then washed with brine. The extracted organic layer was dried over sodium sulfate and concentrated through rotary evaporation. Subsequent flash column chromatography (hexanes/EtOAc) (10:1) produced 2-(but-3-en-1-yl)isoindoline-1,3-dione.<sup>5</sup>

## II. Optimization of Conditions (Photocatalytic Diazidation)

### 2.1 optimization of iron salts

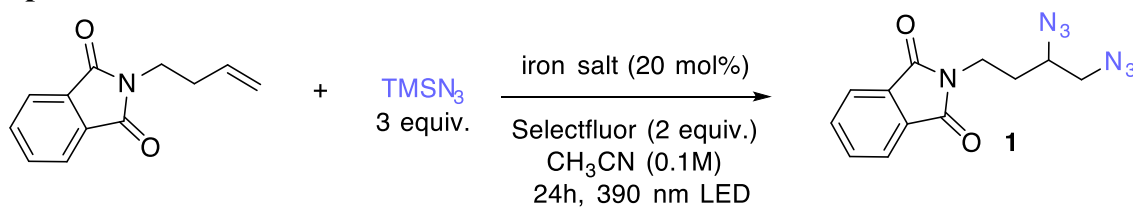

| Entry | Cat.                                                 | yield (%) |
|-------|------------------------------------------------------|-----------|
| 1     | Fe(NO <sub>3</sub> ) <sub>3</sub> ·9H <sub>2</sub> O | 50        |
| 2     | Fe(OTf) <sub>3</sub>                                 | 36        |
| 3     | Fe(acac) <sub>3</sub>                                | 48        |
| 4     | FeCl <sub>3</sub> ·6H <sub>2</sub> O                 | 24        |
| 5     | Fe(OAc) <sub>2</sub>                                 | 62        |
| 6     | FeCl <sub>2</sub>                                    | 48        |

## 2.2 optimization of the amount of oxidant

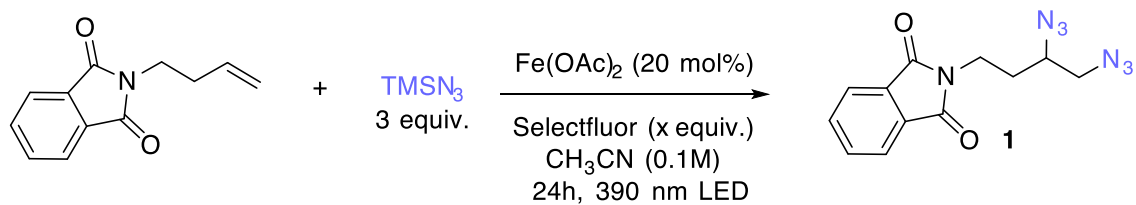

| Entry | Selectfluor | yield (%) |
|-------|-------------|-----------|
| 1     | 1.0 equiv.  | 80        |
| 2     | 1.5 equiv.  | 76        |
| 3     | 2.0 equiv.  | 62        |
| 4     | 2.5 equiv.  | 56        |

## 2.3 optimization of iron catalyst loading

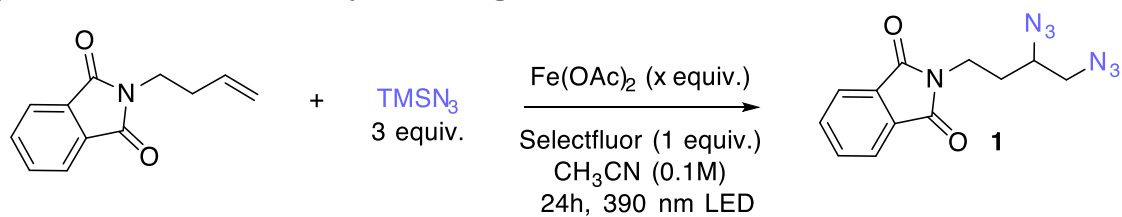

| Entry | $\text{Fe}(\text{OAc})_2$ | yield (%) |
|-------|---------------------------|-----------|
| 1     | 2.5 mol%                  | 72        |
| 2     | 5 mol%                    | 76        |
| 3     | 10 mol%                   | 88        |
| 4     | 20 mol%                   | 80        |

## 2.4 optimization of wavelength

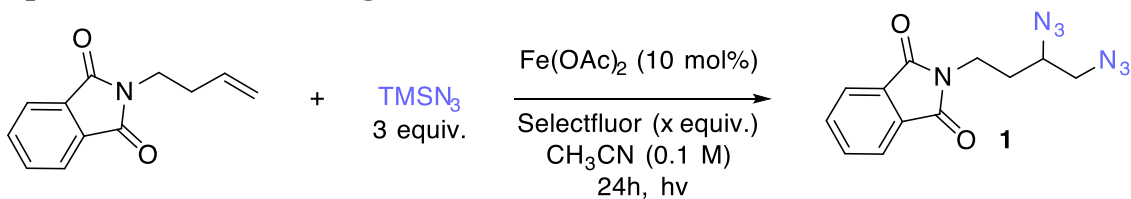

| Entry | wavelength | yield (%) |
|-------|------------|-----------|
| 1     | 390 nm     | 88        |
| 2     | 427 nm     | 72        |
| 3     | 456 nm     | 76        |

## 2.5 control experiments

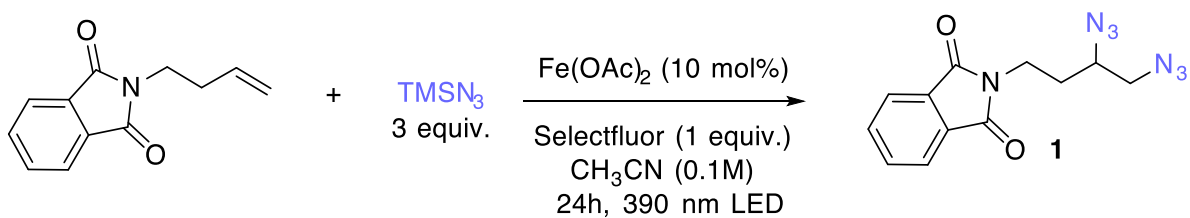

| Entry | Deviation from the standard conditions | yield (%) |
|-------|----------------------------------------|-----------|
| 1     | no iron salt                           | 12        |
| 2     | no light                               | ND        |
| 3     | no Selectfluor                         | 20        |



# III. Optimization of Conditions (Photocatalytic Dichlorination)

## 3.1 optimization of iron salts

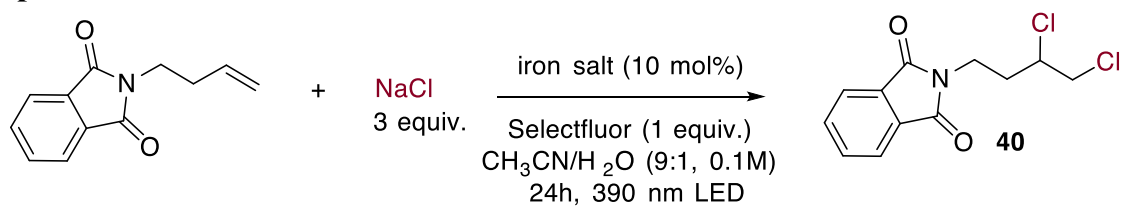

| Entry | Cat. (20 mol%)                                       | yield (%) |
|-------|------------------------------------------------------|-----------|
| 1     | Fe(NO <sub>3</sub> ) <sub>3</sub> ·9H <sub>2</sub> O | 86        |
| 2     | Fe(OTf) <sub>3</sub>                                 | 82        |
| 3     | Fe(acac) <sub>3</sub>                                | 12        |
| 4     | FeCl <sub>3</sub> ·6H <sub>2</sub> O                 | 82        |
| 5     | Fe(SO <sub>4</sub> ) <sub>3</sub> ·5H <sub>2</sub> O | 80        |
| 6     | Fe(OAc) <sub>2</sub>                                 | 32        |
| 7     | FeCl <sub>2</sub>                                    | 72        |

### 3.2 control experiments

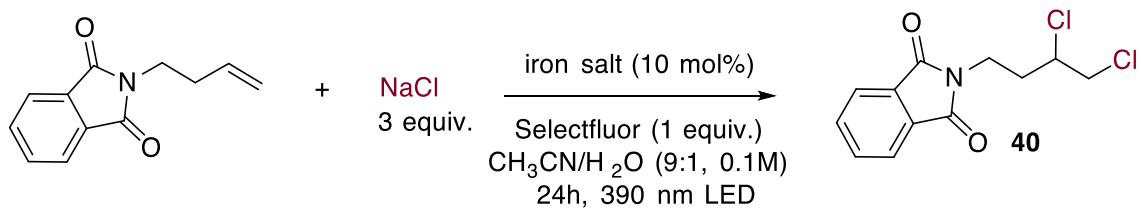

| Entry | Deviation from the standard conditions | yield (%) |
|-------|----------------------------------------|-----------|
| 1     | no iron salt                           | ND        |
| 2     | no light                               | ND        |
| 3     | no Selectfluor                         | trace     |
| 4     | no water                               | trace     |

# IV. Optimization of Conditions (Photocatalytic Fluorochlorination)

## 4.1 optimization of iron salts

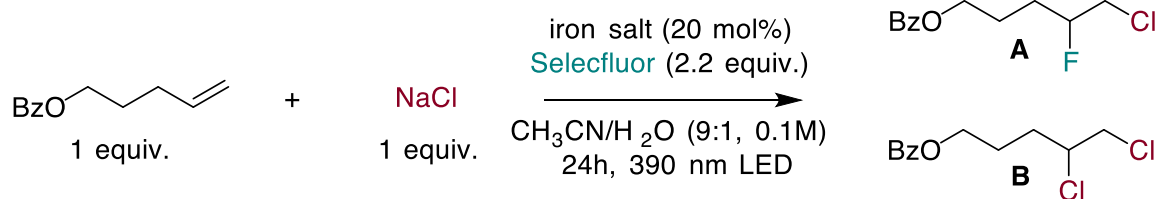

| Entry | [Fe]                                                 | yield (A/B) |
|-------|------------------------------------------------------|-------------|
| 1     | FeCl <sub>2</sub>                                    | 8/4         |
| 2     | Fe(OAc) <sub>2</sub>                                 | 56/8        |
| 3     | Fe(NO <sub>3</sub> ) <sub>3</sub> ·9H <sub>2</sub> O | trace/44    |
| 4     | Fe(OTf) <sub>3</sub>                                 | 8/36        |
| 5     | FeCl <sub>3</sub> 6H <sub>2</sub> O (5%)             | trace/32    |
| 6     | FeCl <sub>3</sub> 6H <sub>2</sub> O (10%)            | trace/52    |

## 4.2 optimization of catalyst loading

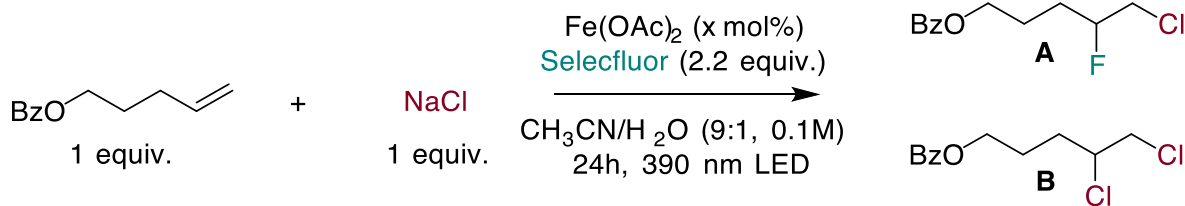

| Entry | $\text{Fe(OAc)}_2$ | yield (A/B) |
|-------|--------------------|-------------|
| 1     | 10%                | 64/8        |
| 2     | 20%                | 56/8        |
| 3     | 30%                | 52/20       |

## 4.3 optimization of reactants loading (alkene)

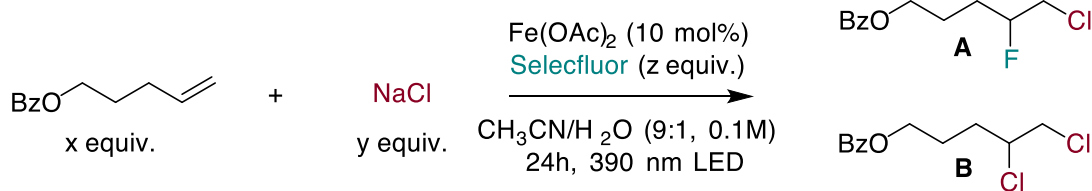

| Entry | x   | y | z   | yield (A/B) |
|-------|-----|---|-----|-------------|
| 1     | 1   | 1 | 2.2 | 64/8        |
| 2     | 1.2 | 1 | 2.2 | 72/8        |
| 3     | 1.4 | 1 | 2.2 | 68/12       |
| 4     | 1.5 | 1 | 2.2 | 66/8        |
| 5     | 1.5 | 1 | 2.5 | 70/16       |

#### 4.4 optimization of reactants loading (Selectfluor)

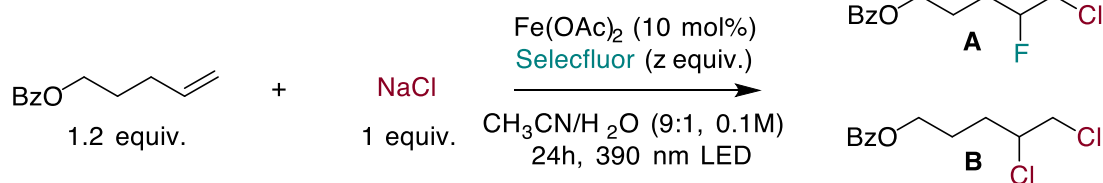

| Entry | $z$ | yield (A/B) |
|-------|-----|-------------|
| 1     | 2   | 72/4        |
| 2     | 2.4 | 68/16       |
| 3     | 1.8 | 64/12       |

## V. Experimental Methods of Difunctionalization of Alkenes

**General Procedure A** for diazidation of alkenes:  $\text{Fe}(\text{OAc})_2$  (0.01 mmol, 10 mol%) and Selectfluor (0.1 mmol, 1.0 equiv.) were added in an oven-dried 8-mL test vial containing a Teflon<sup>®</sup>-coated magnetic stir bar. The vial was evacuated and backfilled with  $\text{N}_2$  (repeated for 4 times), followed by addition of alkenes (0.1 mmol, 1.0 equiv.) and  $\text{TMSN}_3$  (0.3 mmol, 3.0 equiv) in MeCN (1.0 mL, 0.1 M in regard to alkenes) via syringe under  $\text{N}_2$ . The reaction mixture was placed under 390nm Kessil<sup>®</sup> light (25% intensity) light after sealing the punctured holes of the vial cap with vacuum grease and electric tape/parafilm for better air-tight protection and allowed to react at room temperature for 24 h. Following this, the reaction mixture was filtered through a pad of celite which was subsequently rinsed with DCM. The filtrate was concentrated, and the residue was then purified by flash column chromatography to give the corresponding diazidated products.

**General Procedure B** for dichlorination of alkenes:  $\text{Fe}(\text{NO}_3)_3 \cdot 9\text{H}_2\text{O}$  (0.02 mmol, 20 mol%), sodium chloride (0.3 mmol, 3.0 equiv.) and Selectfluor (0.1 mmol, 1.0 equiv.) were added in an oven-dried 8-mL test vial containing a Teflon<sup>®</sup>-coated magnetic stir bar. The vial was evacuated and backfilled with  $\text{N}_2$  (repeated for 4 times), followed by addition of alkenes (0.1 mmol, 1.0

equiv.) in MeCN/H<sub>2</sub>O (9:1, 1.0 mL, 0.1 M in regard to alkenes) via syringe under N<sub>2</sub>. The reaction mixture was placed under 390nm Kessil<sup>®</sup> light (25% intensity) light after sealing the punctured holes of the vial cap with vacuum grease and electric tape/parafilm for better air-tight protection and allowed to react at room temperature for 24 h. Following this, the reaction mixture was filtered through a pad of celite which was subsequently rinsed with DCM. The filtrate was concentrated, and the residue was then purified by flash column chromatography to give the corresponding dichlorinated products.

**General Procedure C** for fluorochlorination of alkenes: Fe(OAc)<sub>2</sub> (0.01 mmol, 8 mol%), sodium chloride (0.1 mmol, 0.8 equiv.) and Selectfluor (0.2 mmol, 1.7 equiv.) were added in an oven-dried 8-mL test vial containing a Teflon<sup>®</sup>-coated magnetic stir bar. The vial was evacuated and backfilled with N<sub>2</sub> (repeated for 4 times), followed by addition of alkenes (0.12 mmol, 1.0 equiv.) in MeCN/H<sub>2</sub>O (9:1, 1.0 mL, 0.1 M in regard to alkenes) via syringe under N<sub>2</sub>. The reaction mixture was placed under 390nm Kessil<sup>®</sup> light (25% intensity) light after sealing the punctured holes of the vial cap with vacuum grease and electric tape/parafilm for better air-tight protection and allowed to react at room temperature for 24 h. Following this, the reaction mixture was filtered through a pad of celite which was subsequently rinsed with DCM. The filtrate was concentrated, and the residue was then purified by flash column chromatography to give the corresponding fluorochlorinated products. Note that optimization of this reaction described in the tables above was done using NaCl as the limiting reagent.

## VI. Preliminary Testing on Photocatalytic Fluoroazidation

**Procedure** for fluoroazidation of alkenes: Fe(OAc)<sub>2</sub> (0.01 mmol, 10 mol%) and Selectfluor (loading according to Table below) were added in an oven-dried 8-mL test vial containing a Teflon<sup>®</sup>-coated magnetic stir bar. The vial was evacuated and backfilled with N<sub>2</sub> (repeated for 4 times), followed by addition of alkenes (0.1 mmol, 1.0 equiv.) and TMSN<sub>3</sub> (0.1 mmol, 1.0 equiv) in MeCN (1.0 mL, 0.1 M in regard to alkenes) via syringe under N<sub>2</sub>. The reaction mixture was placed under 390nm Kessil<sup>®</sup> light (25% intensity) after sealing the punctured holes of the vial cap with vacuum grease and electric tape/parafilm for better air-tight protection and allowed to react at room temperature for 24 h. Following this, the reaction mixture was filtered through a pad of celite which was subsequently rinsed with DCM. The filtrate was concentrated, and the residue was then purified by preparatory thin-layer chromatography (with eluent of Hex:EA = 5:1) to give the corresponding fluoroazidation products.

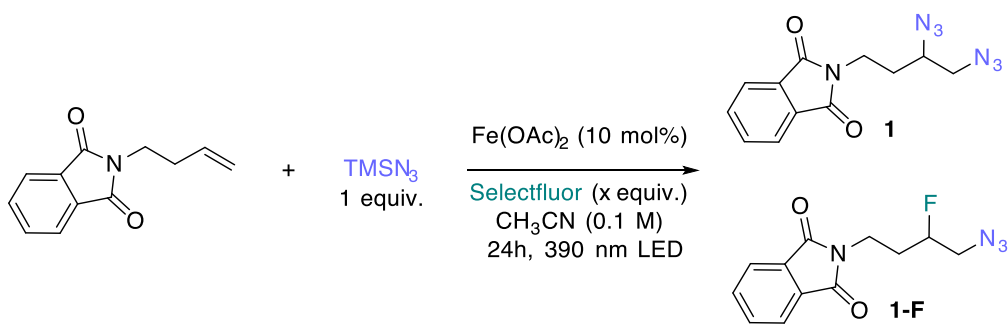

| Entry          | x equiv.   | yield (1) (%) | yield (1-F) (%) |
|----------------|------------|---------------|-----------------|
| 1 <sup>a</sup> | 2 equiv.   | 16            | 8               |
| 2 <sup>b</sup> | 1.5 equiv. | 20            | 9               |
| 3 <sup>c</sup> | 2 equiv.   | 68            | trace           |

<sup>a</sup> with 1 equiv. of alkene. <sup>b</sup> with 1.2equiv. of alkene. <sup>c</sup> with 3 equiv. of TMSN<sub>3</sub>. <sup>1</sup>H NMR yield was determined by using CH<sub>2</sub>Br<sub>2</sub> as an internal standard.

## 2-(4-azido-3-fluorobutyl)isoindoline-1,3-dione

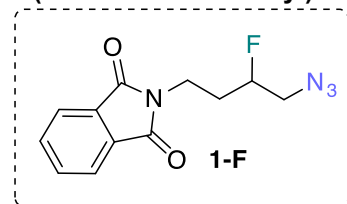

$^1\text{H NMR}$  (600 MHz,  $\text{CDCl}_3$ )  $\delta$  7.79 (dd,  $J = 5.5, 3.0$  Hz, 2H), 7.66 (dd,  $J = 5.5, 3.0$  Hz, 2H), 4.74 – 4.58 (m, 1H), 3.83 – 3.77 (m, 2H), 3.41 – 3.32 (m, 2H), 2.14 – 2.04 (m, 1H), 1.99 – 1.86 (m, 1H).

$^{13}\text{C NMR}$  (151 MHz,  $\text{CDCl}_3$ )  $\delta$  168.22, 134.13, 132.00, 123.40, 90.61 (d,  $J = 174.3$  Hz), 54.03 (d,  $J = 21.9$  Hz), 34.13 (d,  $J = 4.7$  Hz), 31.12 (d,  $J = 20.6$  Hz).

$^{19}\text{F NMR}$  (565 MHz,  $\text{CDCl}_3$ )  $\delta$  -186.19 – -186.66 (m).

HRMS ESI:  $[\text{M}-\text{N}_2+\text{H}]^+$  calcd. for  $\text{C}_{12}\text{H}_{12}\text{FN}_4\text{O}_2$ : 263.0939; Found 263.0936

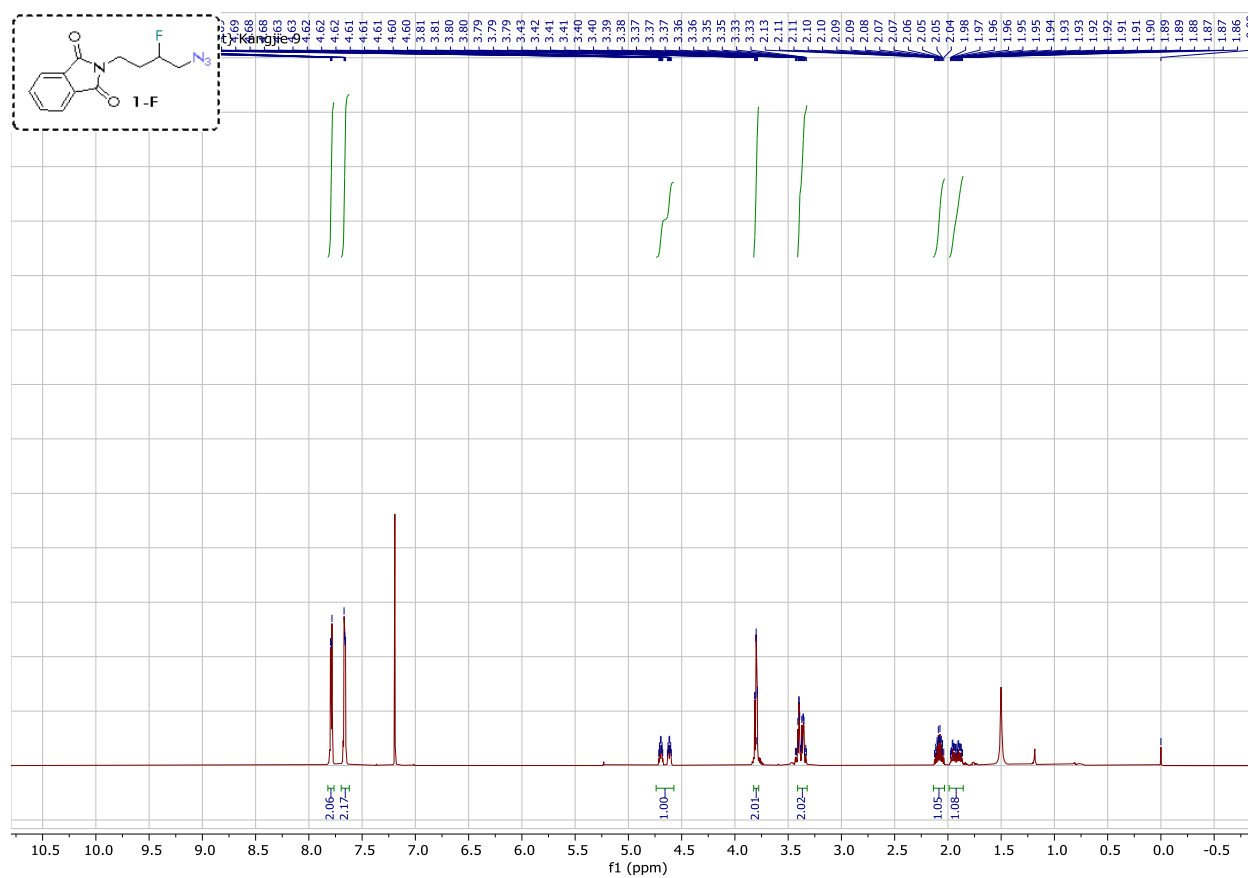



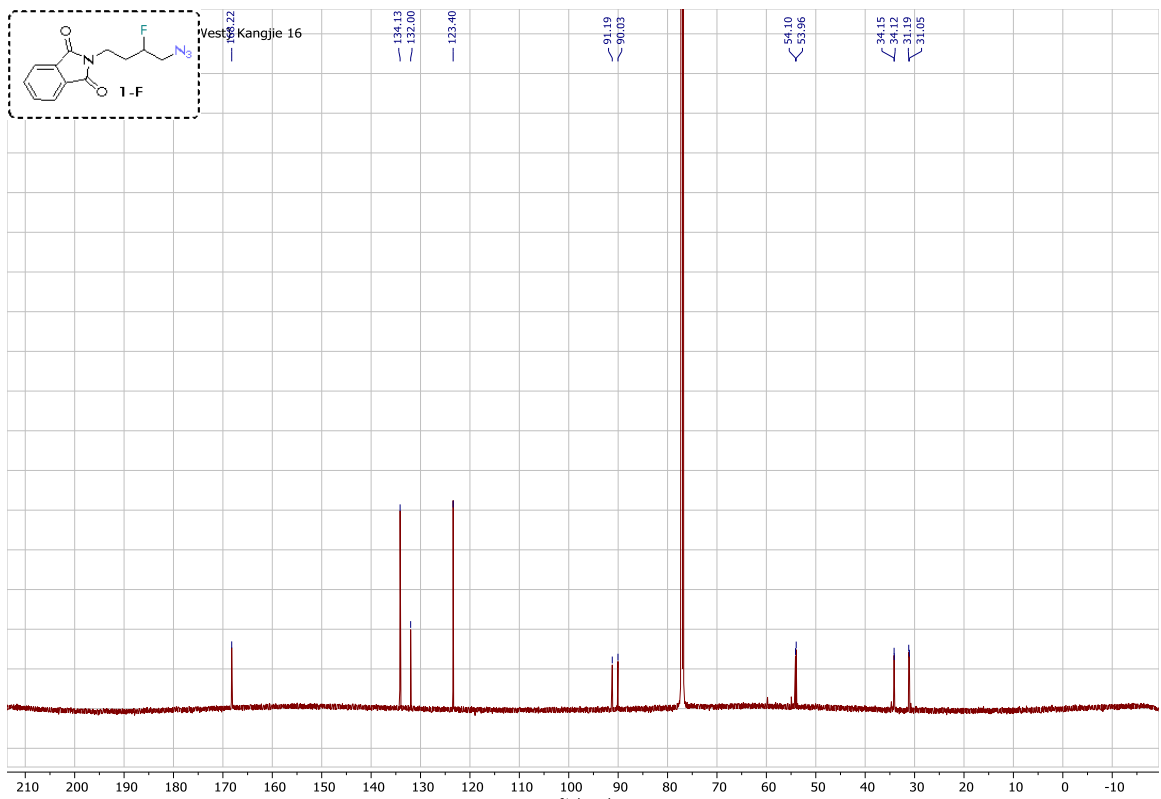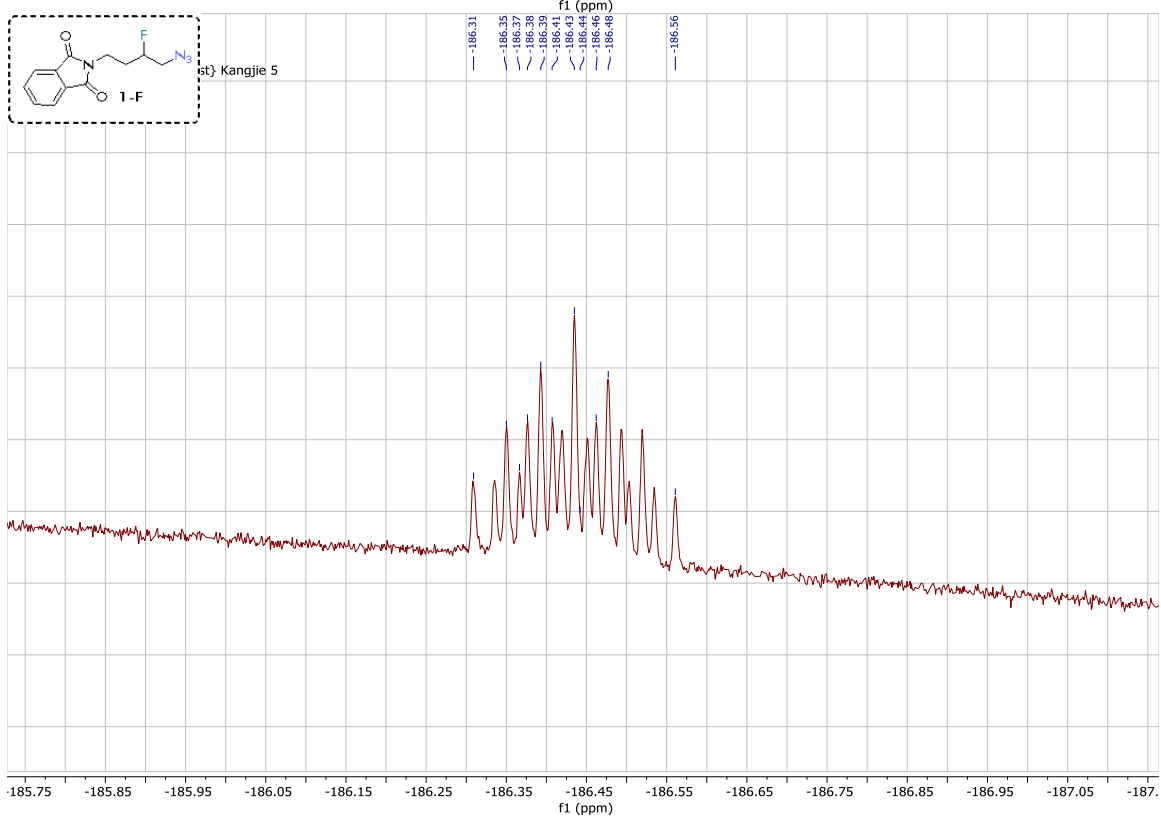

## VII. Characterization of Corresponding Products

### 2-(3,4-diazidobutyl)isoindoline-1,3-dione

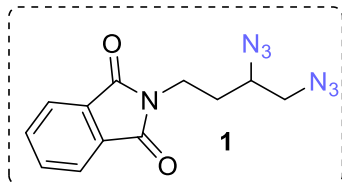

Prepared according to General Procedure A and obtained as white solid. **Yield** 86%, 24.5 mg. Purification is through preparatory thin-layer chromatography (with eluent of Hex: EA = 3:1) to give the corresponding diazidation products.

**<sup>1</sup>H NMR (600 MHz, CDCl<sub>3</sub>)** δ 7.87 (dd, *J* = 5.4, 3.1 Hz, 2H), 7.74 (dd, *J* = 5.4, 3.0 Hz, 2H), 3.84 (qt, *J* = 14.0, 6.7 Hz, 2H), 3.58 – 3.52 (m, 1H), 3.49 (dd, *J* = 12.7, 4.1 Hz, 1H), 3.42 (dd, *J* = 12.7, 7.3 Hz, 1H), 1.91 (dtd, *J* = 14.1, 7.0, 4.3 Hz, 1H), 1.82 (dtd, *J* = 14.3, 9.3, 6.4 Hz, 1H).

**<sup>13</sup>C NMR (151 MHz, CDCl<sub>3</sub>)** δ 168.27, 134.19, 131.95, 123.43, 59.75, 54.94, 34.68, 30.77.

The compound characterization was reported in literature.<sup>6</sup>

### 1,2-diazidododecane

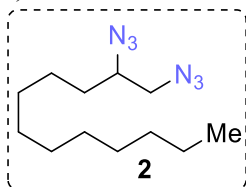

Prepared according to General Procedure A and obtained as colorless oil. **Yield** 87%, 21.9 mg. Purification is through preparatory column chromatography (with eluent of Hex: EA = 15:1) to give the corresponding diazidation products.

**<sup>1</sup>H NMR (600 MHz, CDCl<sub>3</sub>)** δ 3.49-3.43 (m, 1H), 3.38 (dd, *J* = 12.7, 4.0 Hz, 1H), 3.31 (dd, *J* = 12.7, 7.4 Hz, 1H), 1.58 – 1.53 (m, 2H), 1.48 – 1.40 (m, 1H), 1.37 – 1.26 (m, 15H), 0.88 (t, *J* = 6.9 Hz, 3H).

**<sup>13</sup>C NMR (151 MHz, CDCl<sub>3</sub>)** δ 62.09, 54.85, 31.90, 31.78, 29.56, 29.51, 29.41, 29.31, 29.30, 25.88, 22.69, 14.12. HRMS APCI: [M-N<sub>2</sub>+H]<sup>+</sup> calcd. for C<sub>12</sub>H<sub>25</sub>N<sub>4</sub>: 225.2074; Found 225.2067

### (3,4-diazidobutyl)benzene

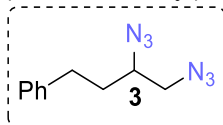

Prepared according to General Procedure A and obtained as colorless oil. **Yield** 85%, 18.4 mg. Purification is through preparatory thin-layer chromatography (with eluent of Hex: EA = 15:1) to give the corresponding diazidation products.

**<sup>1</sup>H NMR (600 MHz, CDCl<sub>3</sub>)** δ 7.35-7.29 (m, 2H), 7.24-7.15 (m, 3H), 3.49 – 3.38 (m, 2H), 3.35 (dd, *J* = 12.6, 7.3 Hz, 1H), 2.86-2.77 (m, 1H), 2.73-2.66 (m, 1H), 1.91 – 1.78 (m, 2H).

**<sup>13</sup>C NMR (151 MHz, CDCl<sub>3</sub>)** δ 140.35, 128.66, 128.39, 126.36, 61.11, 54.94, 33.39, 32.00.

The compound characterization was reported in literature.<sup>6</sup>

### 4,5-diazidopentyl benzoate

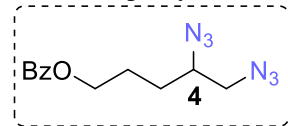

Prepared according to General Procedure A and obtained as colorless oil. **Yield** 84%, 23.0 mg. Purification is through preparatory thin-layer chromatography (with eluent of Hex: EA = 10:1) to give the corresponding diazidation products. **<sup>1</sup>H NMR (600 MHz, CDCl<sub>3</sub>)** δ 8.08 – 7.98 (m, 2H), 7.60 – 7.54 (m, 1H), 7.49 – 7.41 (m, 2H), 4.41 – 4.31 (m, 2H), 3.58-3.52 (m, 1H), 3.45 (dd, *J* = 12.7, 4.2 Hz, 1H), 3.38 (dd, *J* = 12.7, 7.3 Hz, 1H), 2.02 – 1.92 (m, 1H), 1.92-1.82 (m, 1H), 1.77 – 1.63 (m, 2H).

$^{13}\text{C}$  NMR (151 MHz,  $\text{CDCl}_3$ )  $\delta$  166.54, 133.09, 130.08, 129.57, 128.44, 64.13, 61.61, 54.86, 28.55, 25.32.  
The compound characterization was reported in literature.<sup>6</sup>

#### 4,5-diazidopentyl 4-chlorobenzoate

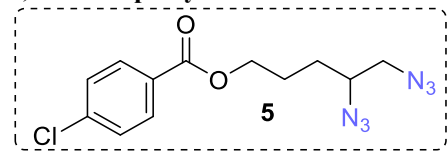

Prepared according to General Procedure A and obtained as colorless oil.

**Yield** 72%, 22.2 mg. Purification is through preparatory thin-layer chromatography (with eluent of Hex: EA = 10:1) to give the corresponding diazidation products.

$^1\text{H}$  NMR (600 MHz,  $\text{CDCl}_3$ )  $\delta$  7.97 (d,  $J$  = 8.6 Hz, 2H), 7.42 (d,  $J$  = 8.6 Hz, 2H), 4.42 – 4.30 (m, 2H), 3.58-3.52 (m, 1H), 3.45 (dd,  $J$  = 12.7, 4.3 Hz, 1H), 3.38 (dd,  $J$  = 12.7, 7.2 Hz, 1H), 2.02 – 1.92 (m, 1H), 1.91-1.81 (m, 1H), 1.76 – 1.62 (m, 2H).

$^{13}\text{C}$  NMR (151 MHz,  $\text{CDCl}_3$ )  $\delta$  165.67, 139.55, 130.96, 128.79, 128.49, 64.38, 61.54, 54.82, 28.48, 25.27.

The compound characterization was reported in literature.<sup>6</sup>

#### 4,5-diazidopentyl 4-(trifluoromethyl)benzoate

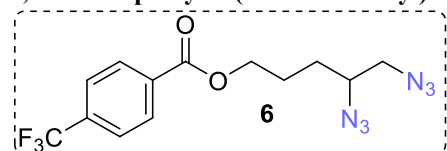

Prepared according to General Procedure A and obtained as colorless oil.

**Yield** 76%, 26.0 mg. Purification is through preparatory thin-layer chromatography (with eluent of Hex: EA = 10:1) to give the corresponding diazidation products.

$^1\text{H}$  NMR (600 MHz,  $\text{CDCl}_3$ )  $\delta$  8.15 (d,  $J$  = 8.1 Hz, 2H), 7.72 (d,  $J$  = 8.2 Hz, 2H), 4.51-4.33 (m, 2H), 3.61-3.52 (m, 1H), 3.46 (dd,  $J$  = 12.6, 4.3 Hz, 1H), 3.40 (dd,  $J$  = 12.7, 7.2 Hz, 1H), 2.03-1.94 (m, 1H), 1.95-1.85 (m, 1H), 1.78 – 1.63 (m, 2H).

$^{13}\text{C}$  NMR (151 MHz,  $\text{CDCl}_3$ )  $\delta$  165.32, 134.55 (q,  $J$  = 32.7 Hz), 133.24, 129.99, 125.49 (q,  $J$  = 3.8 Hz), 123.60 (q,  $J$  = 272.5 Hz), 64.72, 61.53, 54.82, 28.45, 25.25.

$^{19}\text{F}$  NMR (565 MHz,  $\text{CDCl}_3$ )  $\delta$  -63.10.

The compound characterization was reported in literature.<sup>6</sup>

#### 4,5-diazidopentyl 4-methylbenzenesulfonate

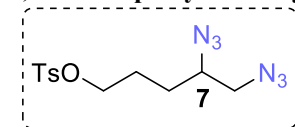

Prepared according to General Procedure A and obtained as colorless oil. **Yield** 86%, 27.9 mg. Purification is through preparatory thin-layer chromatography (with eluent of Hex: EA = 5:1) to give the corresponding diazidation products.

$^1\text{H}$  NMR (600 MHz,  $\text{CDCl}_3$ )  $\delta$  7.79 (d,  $J$  = 8.2 Hz, 2H), 7.36 (d,  $J$  = 8.0 Hz, 2H), 3.45 – 3.36 (m, 2H), 3.31 (dd,  $J$  = 12.5, 7.1 Hz, 1H), 2.46 (s, 3H), 1.88-1.78 (m, 1H), 1.78-1.69 (m, 1H), 1.65 – 1.59 (m, 1H), 1.55-1.46 (m, 1H).

$^{13}\text{C}$  NMR (151 MHz,  $\text{CDCl}_3$ )  $\delta$  145.04, 132.86, 129.95, 127.90, 69.54, 61.26, 54.81, 27.93, 25.40, 21.66.

The compound characterization was reported in literature.<sup>6</sup>

#### 4,5-diazidopentyl (2,2,2-trichloroethyl) carbonate

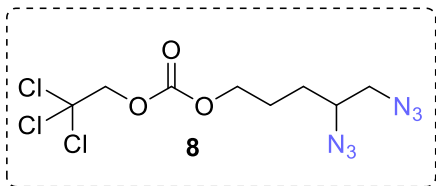

Prepared according to General Procedure A and obtained as colorless oil.

**Yield** 78%, 27.0 mg. Purification is through preparatory thin-layer chromatography (with eluent of Hex: EA = 7:1) to give the corresponding diazidation products.

**<sup>1</sup>H NMR (600 MHz, CDCl<sub>3</sub>)** δ 4.78 (s, 2H), 4.33-4.22 (m, 2H), 3.56-3.48 (m, 1H), 3.44 (dd, *J* = 12.7, 4.2 Hz, 1H), 3.37 (dd, *J* = 12.7, 7.2 Hz, 1H), 1.97-1.88 (m, 1H), 1.88 – 1.78 (m, 1H), 1.73 – 1.65 (m, 1H), 1.65 – 1.58 (m, 1H).

**<sup>13</sup>C NMR (151 MHz, CDCl<sub>3</sub>)** δ 153.94, 94.38, 76.80, 68.33, 61.51, 54.85, 28.20, 25.14. The compound characterization was reported in literature.<sup>6</sup>

#### 4,5-diazidopentyl furan-2-carboxylate

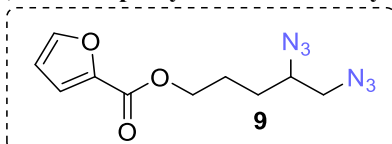

Prepared according to General Procedure A and obtained as colorless oil.

**Yield** 42%, 11.1 mg. Purification is through preparatory thin-layer chromatography (with eluent of Hex: EA = 10:1) to give the corresponding diazidation products.

**<sup>1</sup>H NMR (600 MHz, CDCl<sub>3</sub>)** δ 7.59 (dd, *J* = 1.8, 0.9 Hz, 1H), 7.20 (dd, *J* = 3.5, 0.8 Hz, 1H), 6.53 (dd, *J* = 3.5, 1.7 Hz, 1H), 4.39-4.30 (m, 2H), 3.61 – 3.50 (m, 1H), 3.45 (dd, *J* = 12.7, 4.1 Hz, 1H), 3.37 (dd, *J* = 12.7, 7.3 Hz, 1H), 1.99 – 1.89 (m, 1H), 1.89-1.81 (m, 1H), 1.73 – 1.62 (m, 2H).<sup>1</sup>

**<sup>13</sup>C NMR (151 MHz, CDCl<sub>3</sub>)** δ 158.65, 146.46, 144.46, 118.14, 111.93, 64.11, 61.56, 54.86, 28.47, 25.24.

HRMS ESI: [M-N<sub>2</sub>+H]<sup>+</sup> calcd. for C<sub>10</sub>H<sub>13</sub>N<sub>4</sub>O<sub>3</sub>: 237.0982; Found 237.0986

#### (tetrahydro-2H-pyran-4-yl)methyl 4,5-diazidopentanoate

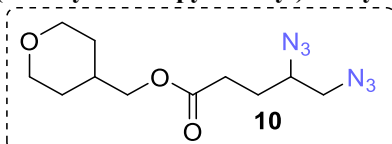

Prepared according to General Procedure A and obtained as colorless oil.

**Yield** 62%, 17.5 mg. Purification is through preparatory column chromatography (with eluent of Hex: EA = 5:1) to give the corresponding diazidation products.

**<sup>1</sup>H NMR (600 MHz, CDCl<sub>3</sub>)** δ 4.03 – 3.94 (m, 4H), 3.62 – 3.54 (m, 1H), 3.46 (dd, *J* = 12.7, 4.2 Hz, 1H), 3.42 – 3.35 (m, 3H), 2.53 – 2.43 (m, 2H), 1.94 – 1.87 (m, 2H), 1.80-1.73 (m, 1H), 1.63-1.58 (m, 2H), 1.42-1.33 (m, 2H).

**<sup>13</sup>C NMR (151 MHz, CDCl<sub>3</sub>)** δ 172.48, 69.00, 67.44, 61.09, 54.86, 34.46, 30.25, 29.47, 26.98.

The compound characterization was reported in literature.<sup>6</sup>

#### 4,5-diazidopentyl quinoline-2-carboxylate

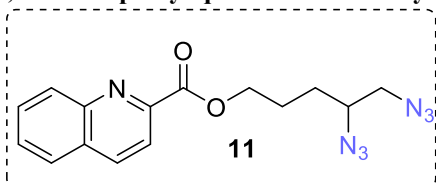

Prepared according to General Procedure A and obtained as colorless oil.

**Yield** 48%, 15.6 mg. Purification is through preparatory thin-layer chromatography (with eluent of Hex: EA = 5:1) to give the corresponding diazidation products.

**<sup>1</sup>H NMR (600 MHz, CDCl<sub>3</sub>)** δ 9.45 (d, *J* = 2.1 Hz, 1H), 8.86 (d, *J* = 2.2 Hz, 1H), 8.18 (d, *J* = 8.5 Hz, 1H), 7.96 (dd, *J* = 8.2, 1.4 Hz, 1H), 7.88—7.82 (m, 1H), 7.70 – 7.57 (m, 1H), 4.52 – 4.39 (m, 2H), 3.61-3.55 (m, 1H), 3.48 (dd, *J* = 12.7, 4.3 Hz, 1H), 3.41 (dd, *J* = 12.7, 7.2 Hz, 1H), 2.11-2.00 (m, 1H), 1.99-1.88 (m, 1H), 1.82-1.74 (m, 1H), 1.74 – 1.69 (m, 1H).

$^{13}\text{C}$  NMR (151 MHz,  $\text{CDCl}_3$ )  $\delta$  165.34, 149.94, 149.88, 138.89, 132.05, 129.50, 129.18, 127.59, 126.84, 122.89, 64.69, 61.56, 54.86, 28.49, 25.33.  
HRMS APCI:  $[\text{M} + \text{H}]^+$  calcd. for  $\text{C}_{15}\text{H}_{16}\text{N}_7\text{O}_2$ : 326.1360; Found 326.1348

#### *N*-(3,4-diazidobutyl)-*N*-methylbenzenesulfonamide

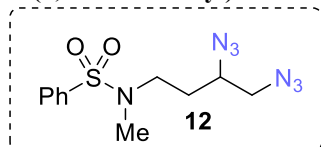

Prepared according to General Procedure A and obtained as colorless oil. **Yield** 70%, 21.7 mg. Purification is through preparatory thin-layer chromatography (with eluent of Hex: EA = 5:1) to give the corresponding diazidation products.

$^1\text{H}$  NMR (600 MHz,  $\text{CDCl}_3$ )  $\delta$  7.85 – 7.76 (m, 2H), 7.66 – 7.60 (m, 1H), 7.60-7.52 (m, 2H), 3.75-3.67 (m, 1H), 3.53 (dd,  $J$  = 12.8, 4.0 Hz, 1H), 3.45 (dd,  $J$  = 12.8, 6.7 Hz, 1H), 3.26-3.18 (m, 1H), 3.05-2.96 (m, 1H), 2.76 (s, 3H), 1.86-1.77 (m, 1H), 1.71 – 1.64 (m, 1H).

$^{13}\text{C}$  NMR (151 MHz,  $\text{CDCl}_3$ )  $\delta$  136.84, 132.88, 129.22, 129.20, 127.38, 58.93, 54.66, 46.99, 35.36, 29.85.

The compound characterization was reported in literature.<sup>6</sup>

#### *N*-(3,4-diazidobutyl)benzenesulfonamide

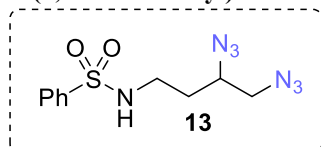

Prepared according to General Procedure A and obtained as colorless oil. **Yield** 69%, 20.4 mg. Purification is through preparatory thin-layer chromatography (with eluent of Hex: EA = 3:1) to give the corresponding diazidation products.

$^1\text{H}$  NMR (600 MHz,  $\text{CDCl}_3$ )  $\delta$  7.94 – 7.82 (m, 2H), 7.65 – 7.59 (m, 1H), 7.58-7.52 (m, 2H), 4.95 (t,  $J$  = 6.3 Hz, 1H), 3.67-3.61 (m, 1H), 3.44 (dd,  $J$  = 12.7, 4.1 Hz, 1H), 3.35 (dd,  $J$  = 12.7, 7.1 Hz, 1H), 3.14 – 3.03 (m, 2H), 1.79-1.69 (m, 1H), 1.64-1.56 (m, 1H).<sup>1</sup>

$^{13}\text{C}$  NMR (151 MHz,  $\text{CDCl}_3$ )  $\delta$  139.42, 132.98, 129.31, 127.02, 59.05, 54.75, 39.88, 31.68.

The compound characterization was reported in literature.<sup>6</sup>

#### 1,2-diazido-6-bromohexane

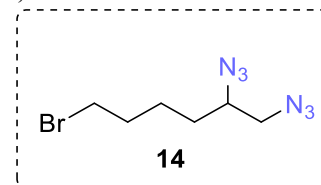

Prepared according to General Procedure A and obtained as colorless oil. **Yield** 89%, 22.0 mg. Purification is through preparatory column chromatography (with eluent of Hex: EA = 10:1) to give the corresponding diazidation products.

$^1\text{H}$  NMR (600 MHz,  $\text{CDCl}_3$ )  $\delta$  3.51 – 3.45 (m, 1H), 3.45 – 3.40 (m, 3H), 3.35 (dd,  $J$  = 12.7, 7.3 Hz, 1H), 1.96 – 1.81 (m, 2H), 1.66 – 1.60 (m, 1H), 1.58 – 1.51 (m, 3H).

$^{13}\text{C}$  NMR (151 MHz,  $\text{CDCl}_3$ )  $\delta$  61.79, 54.76, 33.16, 32.20, 30.91, 24.52.

The compound characterization was reported in literature.<sup>6</sup>

#### 2-(2,3-diazidopropyl)cyclohexan-1-one

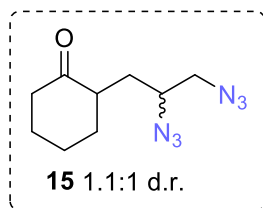

Prepared according to General Procedure A and obtained as colorless oil. **Yield** 68%, 15.1 mg. Purification is through preparatory column chromatography (with eluent of Hex: EA = 5:1) to give the corresponding 1.1:1 mixture of diastereomeric diazidation products.

**<sup>1</sup>H NMR (600 MHz, CDCl<sub>3</sub>)** δ 3.74-3.64 (m, 0.50H), 3.63-3.55 (m, 0.45H), 3.50 (dd, *J* = 12.7, 3.8 Hz, 1H), 3.44 (dd, *J* = 12.7, 3.9 Hz, 0.48H), 3.39-3.30 (m, 1H), 2.61-2.54 (m, 0.54H), 2.52-2.46 (m, 0.48H), 2.45 – 2.31 (m, 2H), 2.24-2.16 (m, 0.47H), 2.16 – 2.01 (m, 2H), 1.98 – 1.85 (m, 1.55H), 1.78 – 1.64 (m, 2H), 1.47 – 1.33 (m, 1.54H), 1.21 – 1.16 (m, 0.52H).

**<sup>13</sup>C NMR (151 MHz, CDCl<sub>3</sub>)** δ 212.58, 211.93, 60.56, 59.18, 55.55, 55.15, 47.17, 46.92, 42.39, 42.10, 35.50, 33.67, 32.44, 31.26, 28.22, 27.85, 25.38, 25.09.

HRMS APCI: [M-N<sub>2</sub>+H]<sup>+</sup> calcd. for C<sub>9</sub>H<sub>15</sub>N<sub>3</sub>O: 195.1240; Found 195.1250

#### 4,5-diazidopentan-1-ol

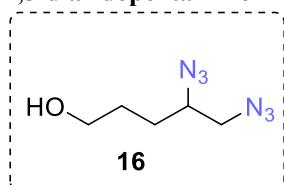

Prepared according to General Procedure A and obtained as colorless oil. **Yield** 53%, 9.0 mg. Purification is through preparatory column chromatography (with eluent of Hex: EA = 5:1) to give the corresponding diazidation products.

**<sup>1</sup>H NMR (600 MHz, CDCl<sub>3</sub>)** δ 3.75-3.66 (m, 2H), 3.57 – 3.51 (m, 1H), 3.43 (dd, *J* = 12.7, 4.0 Hz, 1H), 3.36 (dd, *J* = 12.7, 7.4 Hz, 1H), 1.76 – 1.62 (m, 4H).

**<sup>13</sup>C NMR (151 MHz, CDCl<sub>3</sub>)** δ 62.16, 61.86, 54.89, 28.80, 28.31.

The compound characterization was reported in literature.<sup>6</sup>

#### 6,7-diazidoheptanoic acid

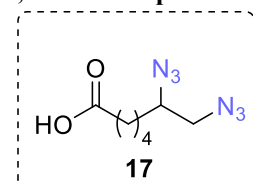

Prepared according to General Procedure A and obtained as colorless oil. **Yield** 52%, 11.0 mg. Purification is through preparatory column chromatography (with eluent of Hex: EA: AcOH = 2:1:0.1) to give the corresponding diazidation products.

**<sup>1</sup>H NMR (600 MHz, CDCl<sub>3</sub>)** δ 3.52-3.44 (m, 1H), 3.40 (dd, *J* = 12.7, 4.1 Hz, 1H), 3.33 (dd, *J* = 12.7, 7.3 Hz, 1H), 2.40 (t, *J* = 7.3 Hz, 2H), 1.72 – 1.63 (m, 2H), 1.60-1.49 (m, 3H), 1.45 (qt, *J* = 9.6, 2.6 Hz, 1H).

**<sup>13</sup>C NMR (151 MHz, CDCl<sub>3</sub>)** δ 179.04, 61.78, 54.80, 33.60, 31.45, 25.33, 24.24.

The compound characterization was reported in literature.<sup>6</sup>

#### (2,3-diazido-2-methylpropyl)benzene

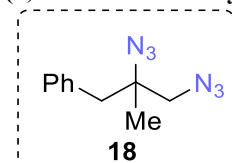

Prepared according to General Procedure A and obtained as colorless oil. **Yield** 76%, 16.4 mg. Purification is through preparatory thin-layer chromatography (with eluent of Hex: EA = 15:1) to give the corresponding diazidation products.

<sup>1</sup>H NMR (600 MHz, CDCl<sub>3</sub>) δ 7.35 – 7.26 (m, 3H), 7.24 – 7.19 (m, 2H), 3.23 (s, 2H), 2.87 (d, *J* = 13.6 Hz, 1H), 2.82 (d, *J* = 13.6 Hz, 1H), 1.29 (s, 3H).

<sup>13</sup>C NMR (151 MHz, CDCl<sub>3</sub>) δ 135.32, 130.47, 128.40, 127.15, 63.94, 58.35, 43.20, 21.09.

The compound characterization was reported in literature.<sup>6</sup>

#### (2,3-diazido-2-methylpropoxy)benzene

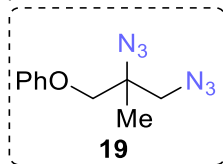

Prepared according to General Procedure A and obtained as colorless oil. **Yield** 86%, 19.9 mg.

Purification is through preparatory thin-layer chromatography (with eluent of Hex: EA = 10:1) to give the corresponding diazidation products.

<sup>1</sup>H NMR (600 MHz, CDCl<sub>3</sub>) δ 7.33 – 7.27 (m, 2H), 7.02-6.96 (m, 1H), 6.95-6.88 (m, 2H), 4.00 – 3.93 (m, 2H), 3.51 (d, *J* = 12.5 Hz, 1H), 3.47 (d, *J* = 12.6 Hz, 1H), 1.45 (s, 3H).

<sup>13</sup>C NMR (151 MHz, CDCl<sub>3</sub>) δ 158.07, 129.60, 121.62, 114.60, 71.29, 62.86, 56.24, 19.26.

The compound characterization was reported in literature.<sup>6</sup>

#### 4,5-diazidooctane

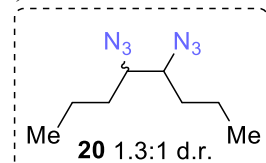

Prepared according to General Procedure A and obtained as colorless oil in the mixture of

two isomers. **Yield** 63%, 12.4 mg. d.r. 1.3:1. Purification is through preparatory column chromatography (with eluent of Hex: EA = 15:1) to give the corresponding diazidation products.

<sup>1</sup>H NMR (600 MHz, CDCl<sub>3</sub>) δ 3.37 – 3.33 (m, 0.85H), 3.30 – 3.25 (m, 1.15H), 1.71-1.63 (m, 1H), 1.62 – 1.57 (m, 2H), 1.56 – 1.48 (m, 3H), 1.46 – 1.38 (m, 2H), 1.00-0.95 (m, 6H).

<sup>13</sup>C NMR (151 MHz, CDCl<sub>3</sub>) δ 65.62, 65.02, 33.36, 32.40, 19.60, 19.48, 13.82.

The compound characterization was reported in literature.<sup>6</sup>

#### 2,3-diazidobutane-1,4-diyl dibenzoate

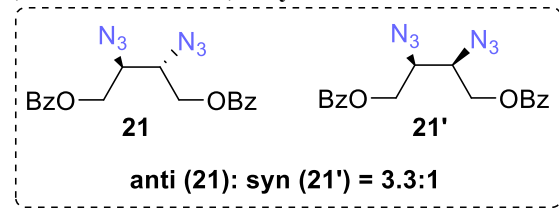

Prepared according to General Procedure A and obtained as

white solid in the mixture of two isomers. **Yield** 40%, 15.2 mg. d.r. = 3.3:1 (anti:syn).<sup>7</sup> Purification is through preparatory thin-layer chromatography (with eluent of Hex: EA = 8:1) to give the corresponding diazidation products.

<sup>1</sup>H NMR (600 MHz, CDCl<sub>3</sub>) δ 8.11-8.03 (m, 4H), 7.65-7.56 (m, 2H), 7.52-7.43 (m, 4H), 4.77 (dd, *J* = 11.7, 2.7 Hz, 0.47H), 4.67 (dd, *J* = 11.6, 4.0 Hz, 1.53H), 4.57 (dd, *J* = 11.6, 7.2 Hz, 1.55H), 4.54 – 4.49 (m, 0.45H), 4.04 – 3.96 (m, 1.51H), 3.95 – 3.90 (m, 0.44H).

<sup>13</sup>C NMR (151 MHz, CDCl<sub>3</sub>) δ 165.98, 165.96, 133.61, 133.57, 129.81, 129.09, 129.00, 128.61, 64.30, 64.28, 60.46, 60.32.

HRMS APCI: [M-N<sub>2</sub>+H]<sup>+</sup> calcd. for C<sub>18</sub>H<sub>17</sub>N<sub>4</sub>O<sub>4</sub>: 353.1244; Found 353.1236

#### 3,4-diazidohexyl benzoate

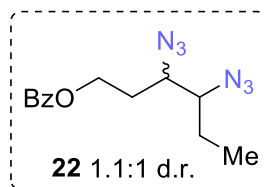

Prepared according to General Procedure A and obtained as colorless oil in a mixture of two isomers. **Yield** 68%, 19.6 mg. d.r. 1.1:1. Purification is through preparatory thin-layer chromatography (with eluent of Hex: EA = 10:1) to give the corresponding diazidation products.

**<sup>1</sup>H NMR (600 MHz, CDCl<sub>3</sub>)** δ 8.00-7.99 (m, 2H), 7.63 – 7.55 (m, 1H), 7.50 – 7.41 (m, 2H), 4.56 – 4.51 (m, 1H), 4.48 – 4.41 (m, 1H), 3.64-3.58 (m, 0.58H), 3.58-3.53 (m, 0.42H), 3.44-3.38 (m, 0.53H), 3.33-3.28 (m, 0.47H), 2.16 – 2.02 (m, 1.56H), 1.96-1.89 (m, 0.54H), 1.79-1.72 (m, 1H), 1.71 – 1.62 (m, 1H), 1.07 (q, *J* = 7.2 Hz, 3H).

**<sup>13</sup>C NMR (151 MHz, CDCl<sub>3</sub>)** δ 166.36, 133.22, 133.19, 129.83, 129.79, 129.58, 128.49, 128.47, 67.29, 66.85, 62.42, 62.01, 61.51, 61.44, 30.65, 29.45, 24.39, 23.90, 10.79, 10.63.

The compound characterization was reported in literature.<sup>6</sup>

#### 4-(4-(1,2-diazidopropyl)cyclohexyl)benzonitrile

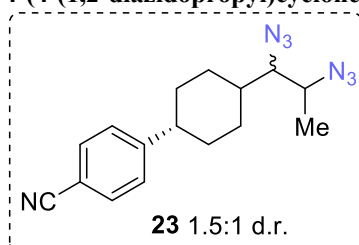

Prepared according to General Procedure A and obtained as colorless oil in a mixture of two isomers. **Yield** 58%, 17.9 mg. d.r. 1.5:1. Purification is through preparatory thin-layer chromatography (with eluent of Hex: EA = 5:1) to give the corresponding diazidation products.

**<sup>1</sup>H NMR (600 MHz, CDCl<sub>3</sub>)** δ 7.61 – 7.56 (m, 2H), 7.33 – 7.28 (m, 2H), 3.70 (qd, *J* = 6.6, 5.0 Hz, 0.40H), 3.64 (p, *J* = 6.5 Hz, 0.60H), 3.17 (t, *J* = 6.2 Hz, 0.59H), 2.95 (dd, *J* = 6.8, 5.0 Hz, 0.39H), 2.59-2.52 (m, 1H), 2.03 – 1.94 (m, 3H), 1.86 – 1.61 (m, 2H), 1.51 – 1.30 (m, 7H).

**<sup>13</sup>C NMR (151 MHz, CDCl<sub>3</sub>)** δ 152.25, 132.32, 127.62, 119.05, 109.99, 72.13, 72.02, 58.06, 57.63, 44.17, 38.89, 38.65, 33.27, 33.17, 33.06, 33.00, 30.10, 30.08, 28.40, 28.23, 16.83, 14.64.

The compound characterization was reported in literature.<sup>6</sup>

#### 2,3-diazido-3-methylbutyl benzoate

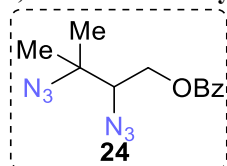

Prepared according to General Procedure A and obtained as colorless oil. **Yield** 71%, 19.5 mg. Purification is through preparatory thin-layer chromatography (with eluent of Hex: EA = 10:1) to give the corresponding diazidation products.

**<sup>1</sup>H NMR (600 MHz, CDCl<sub>3</sub>)** δ 8.10 – 8.05 (m, 2H), 7.62 – 7.58 (m, 1H), 7.50-7.43 (m, 2H), 4.75 (dd, *J* = 11.5, 2.8 Hz, 1H), 4.30 (dd, *J* = 11.5, 9.5 Hz, 1H), 3.69 (dd, *J* = 9.4, 2.8 Hz, 1H), 1.42 (s, 3H), 1.39 (s, 3H).

**<sup>13</sup>C NMR (151 MHz, CDCl<sub>3</sub>)** δ 166.27, 133.46, 129.81, 129.33, 128.58, 68.32, 64.65, 62.11, 23.84, 22.96.

The compound characterization was reported in literature.<sup>6</sup>

#### 1,2-diazidocyclooctane



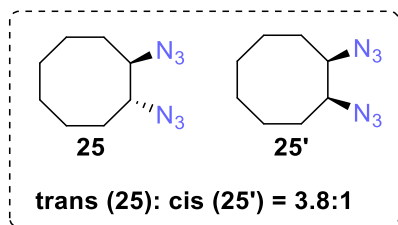

Prepared according to General Procedure A and obtained as colorless oil in the mixture of two isomers. **Yield** 64%, 12.4 mg. d.r. = 3.8:1 (trans:cis).<sup>8</sup> Purification is through preparatory column chromatography (with eluent of Hex: EA = 15:1) to give the corresponding diazidation products.

**<sup>1</sup>H NMR (600 MHz, CDCl<sub>3</sub>)** δ 3.81 – 3.70 (m, 0.41H), 3.51 (dd, *J* = 4.9, 2.2 Hz, 1.60H), 1.97-1.89 (m, 2H), 1.84 – 1.71 (m, 4H), 1.70 – 1.62 (m, 2H), 1.60 – 1.54 (m, 2H), 1.48-1.31 (m, 2H).

**<sup>13</sup>C NMR (151 MHz, CDCl<sub>3</sub>)** δ 66.57, 63.37, 29.24, 28.10, 26.43, 25.55, 24.74, 23.46.

The compound characterization was reported in literature.<sup>6</sup>

### 2,3-diazidobicyclo[2.2.1]heptane, (1*R*,2*R*,3*R*,4*S*)-2,3-diazidobicyclo[2.2.1]heptane

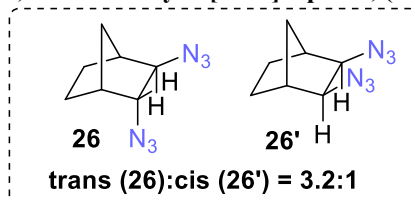

Prepared according to General Procedure A and obtained as colorless oil in the mixture of two isomers. **Yield** 65%, 11.5 mg. d.r. = 3.2:1 (trans:cis).<sup>9</sup> Purification is through preparatory column chromatography (with eluent of Hex: EA = 15:1) to give the corresponding diazidation products.

**<sup>1</sup>H NMR (600 MHz, CDCl<sub>3</sub>)** δ 3.66 (dt, *J* = 4.5, 2.2 Hz, 0.26H), 3.60 (d, *J* = 1.7 Hz, 1.74H), 3.19 (t, *J* = 2.6 Hz, 0.25H), 2.52 – 2.41 (m, 0.31H), 2.36 (dq, *J* = 3.3, 1.6 Hz, 1.74H), 2.33 (d, *J* = 4.3 Hz, 0.28H), 1.79-1.73 (m, 1H), 1.69 – 1.62 (m, 1H), 1.62-1.59 (m, 1H), 1.43 – 1.36 (m, 0.57H), 1.24-1.21 (m, 1H), 1.18-1.16 (m, 1H).

**<sup>13</sup>C NMR (151 MHz, CDCl<sub>3</sub>)** δ 70.44, 69.99, 67.47, 41.96, 41.61, 41.54, 40.51, 35.01, 33.37, 26.27, 25.89, 25.78, 20.86.

The compound characterization was reported in literature.<sup>6</sup>

### (5*R*)-5-(1,2-diazidopropan-2-yl)-2-methylcyclohex-2-en-1-one

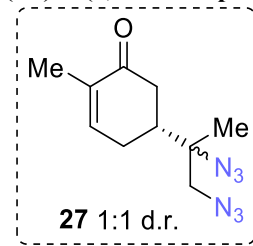

Prepared according to General Procedure A and obtained as colorless oil in the mixture of two isomers. **Yield** 54%, 12.7 mg. d.r. 1:1. Purification is through preparatory thin-layer chromatography (with eluent of Hex: EA = 3:1) to give the corresponding diazidation products.

**<sup>1</sup>H NMR (600 MHz, CDCl<sub>3</sub>)** δ 6.82-6.65 (m, 1H), 3.47 – 3.33 (m, 2H), 2.55 – 2.46 (m, 1H), 2.42 – 2.22 (m, 4H), 1.78 (s, 3H), 1.37 (d, *J* = 5.4 Hz, 3H).

**<sup>13</sup>C NMR (151 MHz, CDCl<sub>3</sub>)** δ 198.52, 198.39, 144.06, 143.64, 135.64, 135.50, 64.73, 64.67, 57.60, 57.48, 41.24, 41.21, 39.04, 38.81, 26.97, 26.67, 18.64, 18.48, 15.60, 15.59.

The compound characterization was reported in literature.<sup>6</sup>

### (1,2-diazidoethyl)benzene

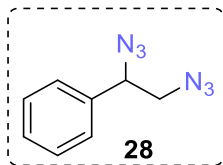

Prepared according to General Procedure A and obtained as colorless oil. **Yield** 86%, 16.2 mg. Purification is through preparatory thin-layer chromatography (with eluent of Hex: EA = 15:1) to give the corresponding diazidation products.

**<sup>1</sup>H NMR (600 MHz, CDCl<sub>3</sub>)** δ 7.45 – 7.36 (m, 3H), 7.36 – 7.31 (m, 2H), 4.67 (dd, *J* = 8.5, 4.8 Hz, 1H), 3.50 (dd, *J* = 12.8, 8.4 Hz, 1H), 3.44 (dd, *J* = 12.8, 4.8 Hz, 1H).

**<sup>13</sup>C NMR (151 MHz, CDCl<sub>3</sub>)** δ 136.30, 129.10, 129.07, 126.95, 65.52, 55.94.

The compound characterization was reported in literature.<sup>6</sup>

### 1,2-diazido-1,2-diphenylethane

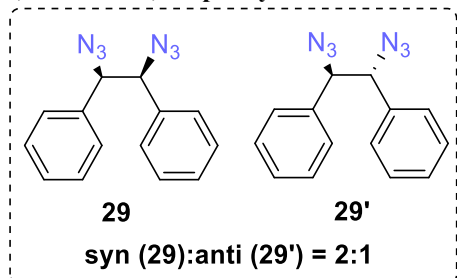

Prepared according to General Procedure A and obtained as colorless oil in the mixture of two isomers. **Yield** 74%, 19.6 mg. d.r. = 2:1 (syn:anti).<sup>10</sup> Purification is through preparatory thin-layer chromatography (with eluent of Hex: EA = 15:1) to give the corresponding diazidation products.

**<sup>1</sup>H NMR (600 MHz, CDCl<sub>3</sub>)** δ 7.41-7.35 (m, 2H), 7.30-7.25 (m, 2H), 7.24-7.21 (s, 3H), 7.12 – 7.01 (m, 3H), 4.69 (s, 0.65H), 4.64 (s, 1.35H).

**<sup>13</sup>C NMR (151 MHz, CDCl<sub>3</sub>)** δ 135.85, 135.76, 129.01, 128.74, 128.70, 128.60, 127.97, 127.68, 70.74, 69.66.

The compound characterization was reported in literature.<sup>6</sup>

### 1,2-diazido-2,3-dihydro-1*H*-indene

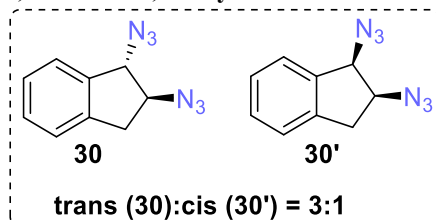

Prepared according to General Procedure A and obtained as colorless oil in a mixture of two isomers. **Yield** 50%, 10.0 mg. d.r. = 3:1 (trans:cis).<sup>10</sup> Purification is through preparatory thin-layer chromatography (with eluent of Hex: EA = 15:1) to give the corresponding diazidation products.

**<sup>1</sup>H NMR (trans) (600 MHz, CDCl<sub>3</sub>)** δ 7.40 – 7.26 (m, 4H), 4.77 (d, *J* = 5.6 Hz, 1H), 4.17 (td, *J* = 7.0, 5.6 Hz, 1H), 3.35 (dd, *J* = 16.0, 7.3 Hz, 1H), 2.94 (dd, *J* = 15.9, 6.6 Hz, 1H).

**<sup>13</sup>C NMR (trans) (151 MHz, CDCl<sub>3</sub>)** δ 139.09, 137.73, 129.48, 127.77, 125.15, 124.57, 70.25, 67.66, 36.12.

**<sup>1</sup>H NMR (cis) (600 MHz, CDCl<sub>3</sub>)** δ 7.42 – 7.29 (m, 4H), 4.84 (d, *J* = 5.6 Hz, 1H), 4.30 (td, *J* = 6.6, 5.6 Hz, 1H), 3.23 – 3.12 (m, 2H).

**<sup>13</sup>C NMR (cis) (151 MHz, CDCl<sub>3</sub>)** δ 139.72, 137.49, 129.75, 127.73, 125.41, 124.94, 66.94, 64.09, 35.57.

The compound characterization was reported in literature.<sup>6</sup>

### 2,3-diazido-3-phenylpropyl benzoate

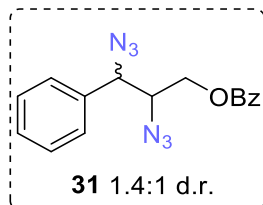

Prepared according to General Procedure A and obtained as colorless oil in the mixture of two isomers. **Yield** 75%, 24.2 mg. d.r. 1.4:1. Purification is through preparatory thin-layer chromatography (with eluent of Hex: EA = 10:1) to give the corresponding diazidation products.

**<sup>1</sup>H NMR (600 MHz, CDCl<sub>3</sub>)** δ 8.08-8.00 (m, 2H), 7.62 – 7.56 (m, 1H), 7.50 – 7.39 (m, 6H), 7.39 – 7.34 (m, 1H), 4.73-4.66 (m, 1H), 4.61-4.56 (m, 0.57H), 4.41 – 4.33 (m, 1H), 4.13-4.09 (m, 0.46H), 4.04-3.97 (m, 0.59H), 3.96 – 3.90 (m, 0.41H).

**<sup>13</sup>C NMR (151 MHz, CDCl<sub>3</sub>)** δ 166.02, 165.90, 135.30, 135.12, 133.47, 133.42, 129.77, 129.74, 129.45, 129.33, 129.22, 129.14, 128.56, 128.54, 127.75, 127.42, 66.75, 65.75, 64.62, 64.30, 64.12, 64.02.

The compound characterization was reported in literature.<sup>6</sup>

#### methyl 2,3-diazido-3-phenylpropanoate

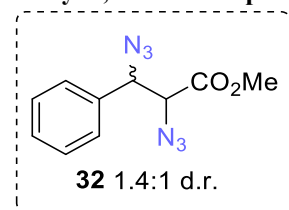

Prepared according to General Procedure A and obtained as colorless oil in a mixture of two isomers. **Yield** (trans+cis) 68%, 16.7 mg. d.r. 1.4:1. Purification is through preparatory thin-layer chromatography (with eluent of Hex: EA = 10:1) to give the corresponding diazidation products.

**<sup>1</sup>H NMR (trans) (600 MHz, CDCl<sub>3</sub>)** δ 7.48 – 7.36 (m, 5H), 4.90 (d, *J* = 8.0 Hz, 1H), 4.10 (d, *J* = 8.1 Hz, 1H), 3.83 (s, 3H).

**<sup>13</sup>C NMR (trans) (151 MHz, CDCl<sub>3</sub>)** δ 168.17, 134.35, 129.45, 129.00, 127.75, 65.45, 65.37, 52.96.

**<sup>1</sup>H NMR (cis) (600 MHz, CDCl<sub>3</sub>)** δ 7.48 – 7.34 (m, 5H), 5.06 (d, *J* = 5.8 Hz, 1H), 4.02 (d, *J* = 5.7 Hz, 1H), 3.75 (s, 3H).

**<sup>13</sup>C NMR (cis) (151 MHz, CDCl<sub>3</sub>)** δ 168.05, 134.89, 129.32, 129.04, 127.43, 66.31, 66.26, 53.04.

The compound characterization was reported in literature.<sup>6</sup>

#### (3,4-dichlorobutyl)benzene

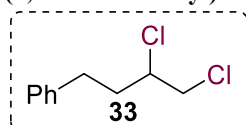

Prepared according to General Procedure B and obtained as colorless oil. **Yield** 81%, 16.3 mg. Purification is through preparatory thin-layer chromatography (with eluent of Hexane) to give the corresponding dichlorination products.

**<sup>1</sup>H NMR (600 MHz, CDCl<sub>3</sub>)** δ 7.34 – 7.28 (m, 2H), 7.24 – 7.18 (m, 3H), 4.03-3.96 (m, 1H), 3.78 (dd, *J* = 11.3, 5.1 Hz, 1H), 3.66 (dd, *J* = 11.4, 7.4 Hz, 1H), 2.96-2.87 (m, 1H), 2.81-2.72 (m, 1H), 2.35-2.27 (m, 1H), 2.08-1.97 (m, 1H).

**<sup>13</sup>C NMR (151 MHz, CDCl<sub>3</sub>)** δ 140.35, 128.57, 128.51, 126.28, 60.20, 48.22, 36.67, 31.99.

HRMS APCI: [M+H]<sup>+</sup> calcd. for C<sub>18</sub>H<sub>28</sub>N<sub>7</sub>O<sub>4</sub>S: 438.1918; Found 438.1908

#### 4,5-dichloropentyl benzoate

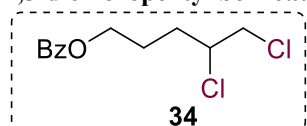

Prepared according to General Procedure B and obtained as colorless oil. **Yield** 86%, 22.5 mg. Purification is through preparatory thin-layer chromatography (with eluent of Hex: EA = 10:1) to give the corresponding dichlorination products.

**<sup>1</sup>H NMR (600 MHz, CDCl<sub>3</sub>)** δ 8.10 – 8.02 (m, 2H), 7.61 – 7.54 (m, 1H), 7.49-7.42 (m, 2H), 4.43 – 4.34 (m, 2H), 4.16 – 4.09 (m, 1H), 3.81 (dd, *J* = 11.4, 5.0 Hz, 1H), 3.68 (dd, *J* = 11.3, 7.8 Hz, 1H), 2.25 – 2.16 (m, 1H), 2.15 – 2.03 (m, 1H), 2.01 – 1.81 (m, 2H).

**<sup>13</sup>C NMR (151 MHz, CDCl<sub>3</sub>)** δ 166.54, 133.03, 130.09, 129.56, 128.41, 64.03, 60.44, 47.96, 31.73, 25.27.

The compound characterization was reported in literature.<sup>11</sup>

#### 4,5-dichloropentyl 4-methoxybenzoate

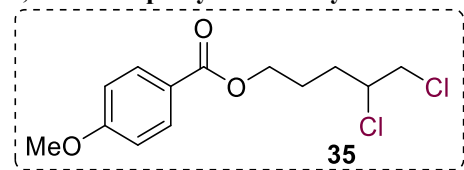

Prepared according to General Procedure B and obtained as colorless oil.

**Yield** 52%, 15.1 mg. Purification is through preparatory thin-layer chromatography (with eluent of Hex: EA = 10:1) to give the corresponding dichlorination products.

**<sup>1</sup>H NMR (600 MHz, CDCl<sub>3</sub>)** δ 8.05 – 7.96 (m, 2H), 6.98-6.87 (m, 2H), 4.39 – 4.30 (m, 2H), 4.15-4.08 (m, 1H), 3.87 (s, 3H), 3.81 (dd, *J* = 11.3, 5.0 Hz, 1H), 3.68 (dd, *J* = 11.3, 7.8 Hz, 1H), 2.25 – 2.16 (m, 1H), 2.12-2.01 (m, 1H), 1.97 – 1.83 (m, 2H).

**<sup>13</sup>C NMR (151 MHz, CDCl<sub>3</sub>)** δ 166.29, 163.38, 131.59, 122.50, 113.63, 63.72, 60.48, 55.44, 47.99, 31.76, 25.31.

HRMS APCI: [M+H]<sup>+</sup> calcd. for C<sub>13</sub>H<sub>17</sub>Cl<sub>2</sub>O<sub>3</sub>: 291.0549; Found 291.0541

#### 4,5-dichloropentyl 4-bromobenzoate

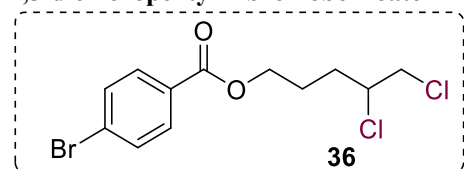

Prepared according to General Procedure B and obtained as colorless oil.

**Yield** 55%, 18.7 mg. Purification is through preparatory thin-layer chromatography (with eluent of Hex: EA = 10:1) to give the corresponding dichlorination products.

**<sup>1</sup>H NMR (600 MHz, CDCl<sub>3</sub>)** δ 8.02 – 7.85 (m, 2H), 7.65 – 7.38 (m, 2H), 4.44 – 4.33 (m, 2H), 4.17 – 4.07 (m, 1H), 3.81 (dd, *J* = 11.3, 4.9 Hz, 1H), 3.67 (dd, *J* = 11.3, 7.9 Hz, 1H), 2.24-2.16 (m, 1H), 2.11 – 2.05 (m, 1H), 1.97 – 1.82 (m, 2H).

**<sup>13</sup>C NMR (151 MHz, CDCl<sub>3</sub>)** δ 165.80, 131.76, 131.09, 130.96, 128.98, 128.77, 128.16, 64.29, 60.33, 47.88, 31.64, 25.19.

HRMS APCI: [M+Cl]<sup>-</sup> calcd. for C<sub>12</sub>H<sub>13</sub>BrCl<sub>2</sub>O<sub>2</sub>: 372.9170; Found 372.9167

#### 4,5-dichloropentyl 4-nitrobenzoate

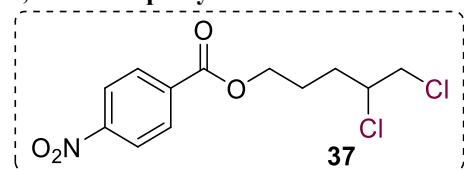

Prepared according to General Procedure B and obtained as colorless oil.

**Yield** 73%, 22.2 mg. Purification is through preparatory thin-layer chromatography (with eluent of Hex: EA = 5:1) to give the corresponding dichlorination products.

**<sup>1</sup>H NMR (600 MHz, CDCl<sub>3</sub>)** δ 8.32 – 8.28 (m, 2H), 8.24 – 8.19 (m, 2H), 4.49 – 4.39 (m, 2H), 4.16-4.07 (m, 1H), 3.83 (dd, *J* = 11.3, 4.8 Hz, 1H), 3.67 (dd, *J* = 11.3, 8.1 Hz, 1H), 2.27-2.18 (m, 1H), 2.18 – 2.07 (m, 1H), 2.02-1.92 (m, 1H), 1.92 – 1.84 (m, 1H).

**<sup>13</sup>C NMR (151 MHz, CDCl<sub>3</sub>)** δ 164.62, 150.59, 135.48, 130.71, 123.60, 65.00, 60.19, 47.80, 31.58, 25.14.

HRMS APCI: [M]<sup>-</sup> calcd. for C<sub>12</sub>H<sub>13</sub>Cl<sub>2</sub>NO<sub>4</sub>: 305.0222; Found 305.0225

#### (2,3-dichloropropoxy)benzene

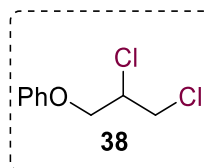

Prepared according to General Procedure B and obtained as colorless oil. **Yield** 56%, 11.4 mg.

Purification is through preparatory thin-layer chromatography (with eluent of Hex: EA = 15:1) to give the corresponding dichlorination products.

**<sup>1</sup>H NMR (600 MHz, CDCl<sub>3</sub>)** δ 7.34 – 7.28 (m, 2H), 7.03-6.98 (m, 1H), 6.97 – 6.89 (m, 2H), 4.38 (tt, *J* = 6.3, 5.0 Hz, 1H), 4.32 – 4.24 (m, 2H), 3.97 (dd, *J* = 11.6, 6.5 Hz, 1H), 3.91 (dd, *J* = 11.6, 5.0 Hz, 1H).

**<sup>13</sup>C NMR (151 MHz, CDCl<sub>3</sub>)** δ 157.92, 129.63, 121.66, 114.70, 68.05, 57.29, 45.02.

HRMS APCI: [M+H]<sup>+</sup> calcd. for C<sub>9</sub>H<sub>11</sub>Cl<sub>2</sub>O: 205.0181; Found 205.0177

#### 4,5-dichloropentyl (2,2,2-trichloroethyl) carbonate

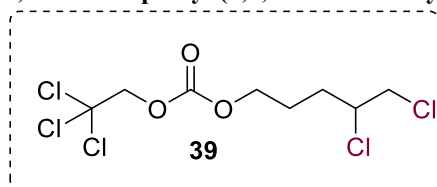

Prepared according to General Procedure B and obtained as colorless oil.

**Yield** 79%, 26.2 mg. Purification is through preparatory column chromatography (with eluent of Hex: EA = 15:1) to give the corresponding dichlorination products.

**<sup>1</sup>H NMR (600 MHz, CDCl<sub>3</sub>)** δ 4.78 (s, 2H), 4.30 (td, *J* = 6.2, 3.7 Hz, 2H), 4.12-4.03 (m, 1H), 3.80 (dd, *J* = 11.4, 4.9 Hz, 1H), 3.66 (dd, *J* = 11.4, 7.8 Hz, 1H), 2.22-2.12 (m, 1H), 2.09 – 1.97 (m, 1H), 1.96 – 1.72 (m, 2H).

**<sup>13</sup>C NMR (151 MHz, CDCl<sub>3</sub>)** δ 153.94, 94.36, 76.75, 68.26, 60.27, 47.90, 31.32, 25.20.

HRMS APCI: [M+Cl]<sup>-</sup> calcd. for C<sub>8</sub>H<sub>11</sub>Cl<sub>6</sub>O<sub>3</sub>: 364.8845; Found 364.8842

#### 2-(3,4-dichlorobutyl)isoindoline-1,3-dione

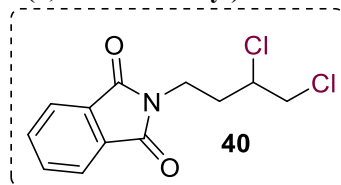

Prepared according to General Procedure B and obtained as white solid. **Yield** 85%,

23.1 mg. Purification is through preparatory thin-layer chromatography (with eluent of Hex: EA = 5:1) to give the corresponding dichlorination products.

**<sup>1</sup>H NMR (600 MHz, CDCl<sub>3</sub>)** δ 7.91 – 7.84 (m, 2H), 7.77-7.71 (m, 2H), 4.14-4.05 (m, 1H), 3.98 – 3.86 (m, 2H), 3.84 (dd, *J* = 11.5, 4.9 Hz, 1H), 3.70 (dd, *J* = 11.5, 7.4 Hz, 1H), 2.52-2.41 (m, 1H), 2.16 – 2.08 (m, 1H).

**<sup>13</sup>C NMR (151 MHz, CDCl<sub>3</sub>)** δ 168.21, 134.12, 131.94, 123.38, 58.11, 47.89, 35.07, 33.88.

HRMS APCI: [M+H]<sup>+</sup> calcd. for C<sub>12</sub>H<sub>12</sub>Cl<sub>2</sub>NO<sub>2</sub>: 272.0240; Found 272.0232

#### *N*-(3,4-dichlorobutyl)-*N*-methylbenzenesulfonamide

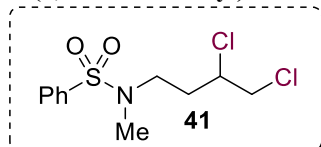

Prepared according to General Procedure B and obtained as colorless oil. **Yield** 58%,

17.1 mg. Purification is through preparatory thin-layer chromatography (with eluent of Hex: EA = 5:1) to give the corresponding dichlorination products.

**<sup>1</sup>H NMR (600 MHz, CDCl<sub>3</sub>)** δ 7.84 – 7.79 (m, 2H), 7.64 – 7.60 (m, 1H), 7.57 – 7.53 (m, 2H), 4.24 – 4.18 (m, 1H), 3.87 (dd, *J* = 11.5, 4.6 Hz, 1H), 3.71 (dd, *J* = 11.5, 7.2 Hz, 1H), 3.32-3.23 (m, 1H), 3.17-3.08 (m, 1H), 2.78 (s, 3H), 2.39-2.29 (m, 1H), 1.94-1.86 (m, 1H).

**<sup>13</sup>C NMR (151 MHz, CDCl<sub>3</sub>)** δ 136.93, 132.83, 129.20, 127.42, 57.65, 48.08, 47.25, 35.52, 33.50.

HRMS APCI: [M+H]<sup>+</sup> calcd. for C<sub>11</sub>H<sub>16</sub>Cl<sub>2</sub>NO<sub>2</sub>S: 296.0273; Found 296.0265

### ***N*-(3,4-dichlorobutyl)benzenesulfonamide**

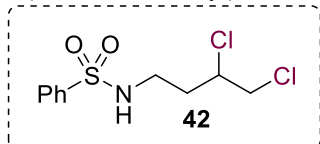

Prepared according to General Procedure B and obtained as colorless oil. **Yield** 52%, 14.7 mg. Purification is through preparatory thin-layer chromatography (with eluent of Hex: EA = 3:1) to give the corresponding dichlorination products.

**<sup>1</sup>H NMR (600 MHz, CDCl<sub>3</sub>)** δ 7.91 – 7.85 (m, 2H), 7.64 – 7.58 (m, 1H), 7.55 (dd, *J* = 8.3, 6.9 Hz, 2H), 4.76 (t, *J* = 6.5 Hz, 1H), 4.17-4.10 (m, 1H), 3.76 (dd, *J* = 11.5, 4.8 Hz, 1H), 3.63 (dd, *J* = 11.5, 7.3 Hz, 1H), 3.25 – 3.13 (m, 2H), 2.29-2.21 (m, 1H), 1.88-1.78 (m, 1H).

**<sup>13</sup>C NMR (151 MHz, CDCl<sub>3</sub>)** δ 139.53, 132.94, 129.29, 127.05, 57.82, 47.99, 40.12, 35.10.

HRMS APCI: [M+H]<sup>+</sup> calcd. for C<sub>10</sub>H<sub>14</sub>Cl<sub>2</sub>NO<sub>2</sub>S: 282.0117; Found 282.0109

### **6-bromo-1,2-dichlorohexane**

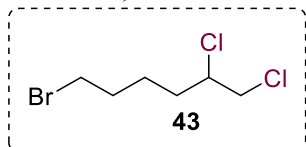

Prepared according to General Procedure B and obtained as colorless oil. **Yield** 82%, 19.1 mg. Purification is through preparatory column chromatography (with eluent of Hexane) to give the corresponding dichlorination products.

**<sup>1</sup>H NMR (600 MHz, CDCl<sub>3</sub>)** δ 4.07-4.01 (m, 1H), 3.78 (dd, *J* = 11.3, 5.0 Hz, 1H), 3.65 (dd, *J* = 11.3, 7.7 Hz, 1H), 3.43 (t, *J* = 6.7 Hz, 2H), 2.10 – 2.00 (m, 1H), 1.99 – 1.84 (m, 2H), 1.82 – 1.70 (m, 2H), 1.63 – 1.56 (m, 1H).

**<sup>13</sup>C NMR (151 MHz, CDCl<sub>3</sub>)** δ 60.63, 47.99, 34.12, 33.14, 32.02, 24.53.

GC-MS: [M]<sup>+</sup> calcd. for C<sub>6</sub>H<sub>11</sub>BrCl<sub>2</sub>: 231.9421; Found 232

### **diethyl 2-(2,3-dichloropropyl)malonate**

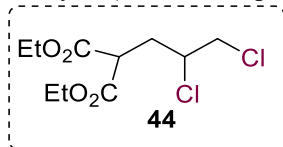

Prepared according to General Procedure B and obtained as colorless oil. **Yield** 80%, 21.7 mg. Purification is through preparatory column chromatography (with eluent of Hex: EA = 7:1) to give the corresponding dichlorination products.

**<sup>1</sup>H NMR (600 MHz, CDCl<sub>3</sub>)** δ 4.31 – 4.17 (m, 4H), 4.17-4.10 (m, 1H), 3.80 (ddd, *J* = 11.5, 5.0, 1.5 Hz, 1H), 3.76 – 3.65 (m, 2H), 2.72-2.64 (m, 1H), 2.23-2.12 (m, 1H), 1.33-1.23 (m, 6H).

**<sup>13</sup>C NMR (151 MHz, CDCl<sub>3</sub>)** δ 168.69, 168.47, 61.88, 61.82, 58.48, 49.06, 48.23, 34.42, 14.05, 14.02.

HRMS APCI: [M+H]<sup>+</sup> calcd. for C<sub>10</sub>H<sub>17</sub>Cl<sub>2</sub>O<sub>4</sub>: 271.0498; Found 271.0491

### **(2,3-dichloro-2-methylpropyl)benzene**

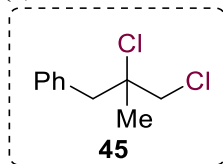

Prepared according to General Procedure B and obtained as colorless oil. **Yield** 73%, 14.8 mg. Purification is through preparatory thin-layer chromatography (with eluent of Hexane) to give the corresponding dichlorination products.

**<sup>1</sup>H NMR (600 MHz, CDCl<sub>3</sub>)** δ 7.41 – 7.26 (m, 5H), 3.63 (s, 2H), 3.14 (d, *J* = 14.1 Hz, 2H), 1.67 (s, 3H).

**<sup>13</sup>C NMR (151 MHz, CDCl<sub>3</sub>)** δ 135.51, 130.84, 128.12, 127.21, 70.62, 51.93, 45.91, 28.25.

GC-MS: [M]<sup>+</sup> calcd. for C<sub>10</sub>H<sub>12</sub>Cl<sub>2</sub>: 202.0316; Found 202

### **(2,3-dichloro-2-methylpropoxy)benzene**

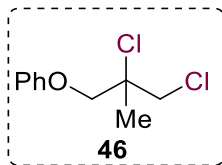

Prepared according to General Procedure B and obtained as colorless oil. **Yield** 70%, 15.3 mg.

Purification is through preparatory thin-layer chromatography (with eluent of Hex: EA = 15:1) to give the corresponding dichlorination products.

**<sup>1</sup>H NMR (600 MHz, CDCl<sub>3</sub>)** δ 7.35 – 7.28 (m, 2H), 7.02-6.97 (m, 1H), 6.97 – 6.91 (m, 2H), 4.21 – 4.10 (m, 2H), 4.01 (d, *J* = 11.4 Hz, 1H), 3.83 (d, *J* = 11.4 Hz, 1H), 1.75 (s, 3H).

**<sup>13</sup>C NMR (151 MHz, CDCl<sub>3</sub>)** δ 158.15, 129.56, 121.56, 114.79, 72.00, 67.96, 50.04, 25.28.

HRMS APCI: [M+H]<sup>+</sup> calcd. for C<sub>10</sub>H<sub>13</sub>Cl<sub>2</sub>O: 219.0338; Found 219.0332

### 2,3-dichlorobutane-1,4-diyl dibenzoate

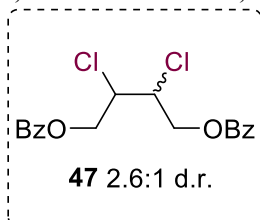

Prepared according to General Procedure B and obtained as white solid in the mixture of

two isomers. **Yield** 68%, 24.9 mg. d.r. 2.6:1. Purification is through preparatory thin-layer chromatography (with eluent of Hex: EA = 5:1) to give the corresponding dichlorination products.

**<sup>1</sup>H NMR (600 MHz, CDCl<sub>3</sub>)** δ 8.13 – 7.99 (m, 4H), 7.64-7.56 (m, 2H), 7.51-7.43 (m, 4H), 4.87 – 4.77 (m, 3H), 4.73 – 4.69 (m, 0.56H), 4.67 – 4.62 (m, 1H), 4.58 – 4.52 (m, 1.44H).

**<sup>13</sup>C NMR (151 MHz, CDCl<sub>3</sub>)** δ 165.84, 133.54, 133.48, 129.77, 129.76, 129.26, 128.56, 128.54, 65.27, 64.95, 58.06, 57.43.

HRMS APCI: [M+H]<sup>+</sup> calcd. for C<sub>18</sub>H<sub>17</sub>Cl<sub>2</sub>O<sub>4</sub>: 367.0498; Found 367.0489

### 3,4-dichlorohexyl benzoate

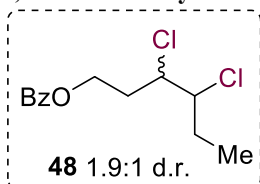

Prepared according to General Procedure B and obtained as colorless oil in a mixture of

two isomers. **Yield** 67%, 18.4 mg. d.r. 1.9:1. Purification is through preparatory thin-layer chromatography (with eluent of Hex: EA = 10:1) to give the corresponding dichlorination products.

**<sup>1</sup>H NMR (600 MHz, CDCl<sub>3</sub>)** δ 8.13-8.01 (m, 2H), 7.63-7.54 (m, 1H), 7.49-7.41 (m, 2H), 4.64 – 4.54 (m, 1H), 4.54 – 4.45 (m, 1H), 4.34-4.29 (m, 0.34H), 4.22-4.16 (m, 0.66H), 4.06 – 3.97 (m, 1H), 2.62 – 2.55 (m, 0.67H), 2.48-2.39 (m, 0.34) 2.28 – 2.14 (m, 1H), 2.12 – 1.99 (m, 1H), 1.90-1.80 (m, 1H), 1.13-1.05 (m, 3H).

**<sup>13</sup>C NMR (151 MHz, CDCl<sub>3</sub>)** δ 166.35, 133.13, 133.10, 129.97, 129.94, 129.58, 128.44, 128.43, 67.43, 67.00, 61.70, 61.67, 61.58, 61.36, 34.01, 33.88, 28.25, 27.80, 11.42, 10.54.

HRMS APCI: [M+H]<sup>+</sup> calcd. for C<sub>13</sub>H<sub>17</sub>Cl<sub>2</sub>O<sub>2</sub>: 275.0600; Found 275.0592

### 2,3-dichloro-3-methylbutyl benzoate

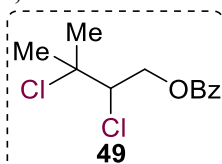

Prepared according to General Procedure B and obtained as colorless oil. **Yield** 78%, 20.4 mg.

Purification is through preparatory thin-layer chromatography (with eluent of Hex: EA = 10:1) to give the corresponding dichlorination products.

$^1\text{H NMR}$  (600 MHz,  $\text{CDCl}_3$ )  $\delta$  8.13 – 8.04 (m, 2H), 7.62 – 7.55 (m, 1H), 7.49-7.43 (m, 2H), 5.04-4.97 (m, 1H), 4.63-4.52 (m, 1H), 4.39-4.31 (m, 1H), 1.80 (d,  $J = 2.2$  Hz, 3H), 1.72 (d,  $J = 2.1$  Hz, 3H).  
 $^{13}\text{C NMR}$  (151 MHz,  $\text{CDCl}_3$ )  $\delta$  166.15, 133.31, 129.76, 129.59, 128.47, 69.20, 67.13, 66.04, 31.75, 27.81.  
 HRMS APCI:  $[\text{M}+\text{H}]^+$  calcd. for  $\text{C}_{12}\text{H}_{15}\text{Cl}_2\text{O}_2$ : 261.0444; Found 261.0437

### 1,2-dichlorocyclooctane

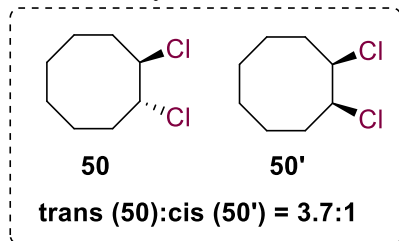

Prepared according to General Procedure B and obtained as colorless oil.

**Yield** 52%, 9.4 mg. d.r. = 3.7:1 (trans:cis).<sup>12</sup> Purification is through preparatory column chromatography (with eluent of Hexane) to give the corresponding dichlorination products.

$^1\text{H NMR}$  (600 MHz,  $\text{CDCl}_3$ )  $\delta$  4.51-4.46 (m, 0.42H), 4.33 – 4.24 (m, 1.58H), 2.36 – 2.18 (m, 2H), 2.15 – 2.00 (m, 2H), 1.98 – 1.81 (m, 2H), 1.79 – 1.65 (m, 2H), 1.64 – 1.56 (m, 2H), 1.55-1.52 (m, 0.42H) 1.47-1.37 (m, 1.58H).

$^{13}\text{C NMR}$  (151 MHz,  $\text{CDCl}_3$ )  $\delta$  68.13, 33.28, 25.42, 25.04.

The compound characterization was reported in literature.<sup>12</sup>

### (5R)-5-(1,2-dichloropropan-2-yl)-2-methylcyclohex-2-en-1-one

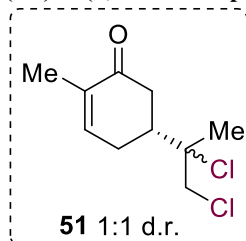

Prepared according to General Procedure B and obtained as colorless oil in a mixture of two isomers.

**Yield** 52%, 15.9 mg. d.r. 1:1. Purification is through preparatory thin-layer chromatography (with eluent of Hex: EA = 5:1) to give the corresponding dichlorination products.

$^1\text{H NMR}$  (600 MHz,  $\text{CDCl}_3$ )  $\delta$  6.81 – 6.67 (m, 1H), 3.85 (dd,  $J = 14.0, 11.4$  Hz, 1H), 3.70 (dd,  $J = 15.8, 11.4$  Hz, 1H), 2.70 – 2.55 (m, 2H), 2.55 – 2.39 (m, 3H), 1.80 (q,  $J = 1.8$  Hz, 3H), 1.68 (d,  $J = 9.6$  Hz, 3H).

$^{13}\text{C NMR}$  (151 MHz,  $\text{CDCl}_3$ )  $\delta$  198.75, 198.44, 143.86, 143.76, 135.38, 135.28, 73.22, 73.17, 50.81, 50.77, 41.14, 40.97, 39.02, 38.78, 26.87, 26.67, 26.31, 26.29, 15.62, 15.60.

HRMS APCI:  $[\text{M}+\text{H}]^+$  calcd. for  $\text{C}_{10}\text{H}_{15}\text{Cl}_2\text{O}$ : 221.0494; Found 221.0488

### (1,2-dichloroethyl)benzene

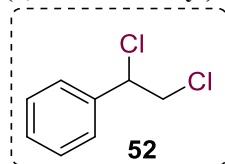

Prepared according to General Procedure B and obtained as colorless oil. **Yield** 74%, 13.0 mg.

Purification is through preparatory thin-layer chromatography (with eluent of Hexane) to give the corresponding dichlorination products.

$^1\text{H NMR}$  (600 MHz,  $\text{CDCl}_3$ )  $\delta$  7.50 – 7.32 (m, 5H), 5.00 (dd,  $J = 8.0, 6.6$  Hz, 1H), 4.00 (dd,  $J = 11.3, 6.6$  Hz, 1H), 3.93 (dd,  $J = 11.4, 8.0$  Hz, 1H).

$^{13}\text{C NMR}$  (151 MHz,  $\text{CDCl}_3$ )  $\delta$  137.97, 129.17, 128.82, 127.39, 61.73, 48.33.

The compound characterization was reported in literature.<sup>13</sup>

### 1,2-dichloro-2,3-dihydro-1H-indene



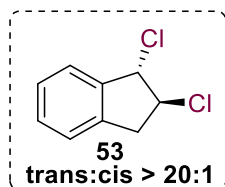

Prepared according to General Procedure B and obtained as colorless oil in single isomer. **Yield** 65%, 12.2 mg. d.r. > 20:1 (trans:cis).<sup>13</sup> Purification is through preparatory thin-layer chromatography (with eluent of Hexane) to give the corresponding dichlorination products. **<sup>1</sup>H NMR (600 MHz, CDCl<sub>3</sub>)** δ 7.49 – 7.42 (m, 1H), 7.37 – 7.27 (m, 3H), 5.35 (d, *J* = 2.9 Hz, 1H), 4.66 (dt, *J* = 6.2, 3.2 Hz, 1H), 3.71 (dd, *J* = 16.7, 6.0 Hz, 1H), 3.18 (dd, *J* = 16.7, 3.4 Hz, 1H). **<sup>13</sup>C NMR (151 MHz, CDCl<sub>3</sub>)** δ 139.83, 139.79, 129.69, 127.92, 125.48, 125.10, 67.57, 64.46, 40.71. The compound characterization was reported in literature.<sup>13</sup>

#### 1,2-dichloropropyl)benzene

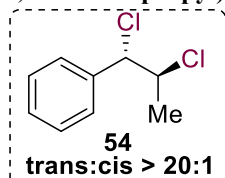

Prepared according to General Procedure B and obtained as colorless oil in single isomer. **Yield** 52%, 9.8 mg. d.r. > 20:1 (trans:cis).<sup>13</sup> Purification is through preparatory thin-layer chromatography (with eluent of Hexane) to give the corresponding dichlorination products. **<sup>1</sup>H NMR (600 MHz, CDCl<sub>3</sub>)** δ 7.42 – 7.33 (m, 5H), 4.91 (d, *J* = 7.8 Hz, 1H), 4.42 – 4.35 (m, 1H), 1.71 (d, *J* = 6.5 Hz, 3H). **<sup>13</sup>C NMR (151 MHz, CDCl<sub>3</sub>)** δ 138.64, 128.79, 128.53, 127.74, 67.40, 60.20, 22.17. The compound characterization was reported in literature.<sup>13</sup>

#### methyl 2,3-dichloro-3-phenylpropanoate

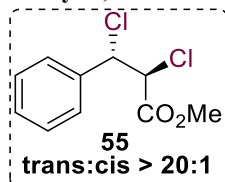

Prepared according to General Procedure B and obtained as colorless oil in single isomer. **Yield** 64%, 14.9 mg. d.r. > 20:1 (trans:cis).<sup>14</sup> Purification is through preparatory thin-layer chromatography (with eluent of Hexane) to give the corresponding dichlorination products. **<sup>1</sup>H NMR (600 MHz, CDCl<sub>3</sub>)** δ 7.46 – 7.36 (m, 5H), 5.18 (d, *J* = 10.7 Hz, 1H), 4.62 (d, *J* = 10.7 Hz, 1H), 3.90 (s, 3H). **<sup>13</sup>C NMR (151 MHz, CDCl<sub>3</sub>)** δ 168.01, 136.30, 129.48, 128.81, 128.07, 61.00, 58.76, 53.42. HRMS APCI: [M+NH<sub>4</sub>]<sup>+</sup> calcd. for C<sub>10</sub>H<sub>14</sub>Cl<sub>2</sub>NO<sub>2</sub>: 250.0396; Found 250.0392

#### 2,3-dichloro-3-phenylpropyl benzoate

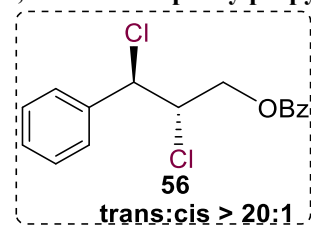

Prepared according to General Procedure B and obtained as colorless oil in single isomer. **Yield** 53%, 16.4 mg. d.r. > 20:1 (trans:cis).<sup>13</sup> Purification is through preparatory thin-layer chromatography (with eluent of Hex: EA = 10:1) to give the corresponding dichlorination products. **<sup>1</sup>H NMR (600 MHz, CDCl<sub>3</sub>)** δ 8.12 – 8.05 (m, 2H), 7.64 – 7.57 (m, 1H), 7.51 – 7.44 (m, 4H), 7.43 – 7.36 (m, 3H), 5.16 (d, *J* = 8.5 Hz, 1H), 4.80 (dd, *J* = 4.7, 2.3 Hz, 1H), 4.65 (dt, *J* = 9.0, 4.7 Hz, 1H).

$^{13}\text{C}$  NMR (151 MHz,  $\text{CDCl}_3$ )  $\delta$  165.90, 137.51, 133.42, 129.77, 129.43, 129.15, 128.72, 128.70, 128.53, 127.92, 65.51, 62.04, 61.62.

The compound characterization was reported in literature.<sup>13</sup>

#### 4,5-diazidopentyl 2-(4-isobutylphenyl)propanoate

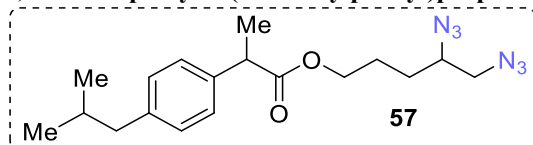

Prepared according to General Procedure A and obtained as colorless oil. **Yield** 68%, 24.3 mg. Purification is through preparatory thin-layer chromatography (with eluent of Hex: EA = 10:1) to give the corresponding diazidation products.

$^1\text{H}$  NMR (600 MHz,  $\text{CDCl}_3$ )  $\delta$  7.19 (d,  $J = 8.1$  Hz, 2H), 7.10 (d,  $J = 8.1$  Hz, 2H), 4.18-4.02 (m, 2H), 3.69 (q,  $J = 7.1$  Hz, 1H), 3.41-3.33 (m, 1H), 3.28 (dd,  $J = 12.7, 4.1$  Hz, 1H), 3.23 (dd,  $J = 12.7, 7.3$  Hz, 1H), 2.45 (d,  $J = 7.2$  Hz, 2H), 1.89-1.81 (m, 1H), 1.79 – 1.71 (m, 1H), 1.68 – 1.62 (m, 1H), 1.49 (d,  $J = 7.2$  Hz, 3H), 1.46 – 1.40 (m, 2H), 0.90 (d,  $J = 6.6$  Hz, 6H).

$^{13}\text{C}$  NMR (151 MHz,  $\text{CDCl}_3$ )  $\delta$  174.67, 140.66, 137.72, 137.71, 129.37, 127.15, 63.81, 63.79, 63.66, 61.44, 61.41, 54.77, 54.76, 45.16, 45.14, 45.13, 45.02, 30.21, 28.30, 28.18, 25.05, 25.01, 22.39, 18.33, 18.29.

HRMS APCI:  $[\text{M}+\text{H}]^+$  calcd. for  $\text{C}_{18}\text{H}_{27}\text{N}_6\text{O}_2$ : 359.2190; Found 359.2184

#### 4,5-diazidopentyl 2-(2-fluoro-[1,1'-biphenyl]-4-yl)propanoate

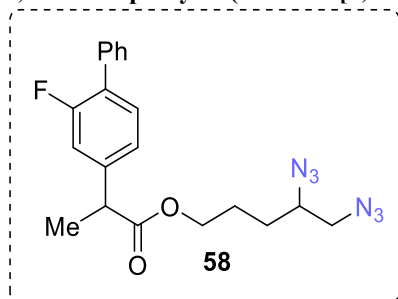

Prepared according to General Procedure A and obtained as colorless oil.

**Yield** 65%, 25.7 mg. Purification is through preparatory thin-layer chromatography (with eluent of Hex: EA = 10:1) to give the corresponding diazidation products.

$^1\text{H}$  NMR (600 MHz,  $\text{CDCl}_3$ )  $\delta$  7.57-7.51 (m, 2H), 7.47-7.42 (m, 2H), 7.42 – 7.34 (m, 2H), 7.17 – 7.09 (m, 2H), 4.21 – 4.07 (m, 2H), 3.76 (q,  $J = 7.2$  Hz, 1H), 3.45 – 3.38 (m, 1H), 3.34 (ddd,  $J = 12.7, 4.2, 1.6$  Hz, 1H), 3.28 (dd,  $J = 12.7, 7.2$  Hz, 1H), 1.84-1.74 (m, 1H), 1.74 – 1.65 (m, 1H), 1.55 – 1.44 (m, 5H).

$^{13}\text{C}$  NMR (151 MHz,  $\text{CDCl}_3$ )  $\delta$  173.91, 159.66 (d,  $J = 248.4$  Hz), 141.70 (d,  $J = 7.6$  Hz), 135.36, 130.84 (d,  $J = 3.9$  Hz), 128.91 (d,  $J = 3.0$  Hz), 128.49, 127.89 (d,  $J = 13.6$  Hz), 127.73, 123.53 (d,  $J = 3.3$  Hz), 115.21 (d,  $J = 23.6$  Hz), 64.11 (d,  $J = 14.3$  Hz), 61.41 (d,  $J = 3.6$  Hz), 54.75, 45.00, 28.26 (d,  $J = 13.6$  Hz), 25.04 (d,  $J = 5.4$  Hz), 18.23 (d,  $J = 4.5$  Hz).

$^{19}\text{F}$  NMR (565 MHz,  $\text{CDCl}_3$ )  $\delta$  -117.52 (t,  $J = 10.5$  Hz).

The compound characterization was reported in literature.<sup>6</sup>

#### 4,5-diazidopentyl 3-methyl-4-oxo-2-phenyl-4H-chromene-8-carboxylate

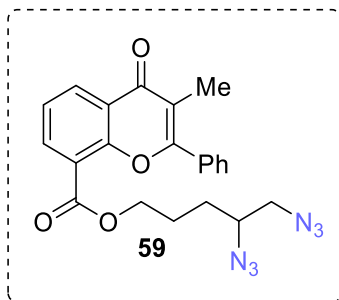

Prepared according to General Procedure A and obtained as colorless oil. **Yield** 84%, 36.3 mg. Purification is through preparatory thin-layer chromatography (with eluent of Hex:EA= 2:1) to give the corresponding diazidation products.

**<sup>1</sup>H NMR (600 MHz, CDCl<sub>3</sub>)** δ 8.48 (dd, *J* = 7.9, 1.8 Hz, 1H), 8.27 (dd, *J* = 7.5, 1.8 Hz, 1H), 7.81 – 7.75 (m, 2H), 7.60-7.53 (m, 3H), 7.46 (t, *J* = 7.7 Hz, 1H), 4.48 – 4.31 (m, 2H), 3.39-3.31 (m, 1H), 3.27 (dd, *J* = 12.7, 4.1 Hz, 1H), 3.22 (dd, *J* = 12.7, 7.4 Hz, 1H), 2.23 (s, 3H), 1.95 – 1.87 (m, 1H), 1.84 – 1.76 (m, 1H), 1.59 – 1.46 (m, 2H).

**<sup>13</sup>C NMR (151 MHz, CDCl<sub>3</sub>)** δ 178.25, 164.53, 161.00, 154.45, 136.25, 133.10, 131.01, 130.59, 129.34, 128.51, 124.11, 123.33, 120.44, 117.82, 64.76, 61.51, 54.79, 28.43, 25.19, 11.80.

The compound characterization was reported in literature.<sup>6</sup>

#### 4,5-diazidopentyl 4-(*N,N*-dipropylsulfamoyl)benzoate

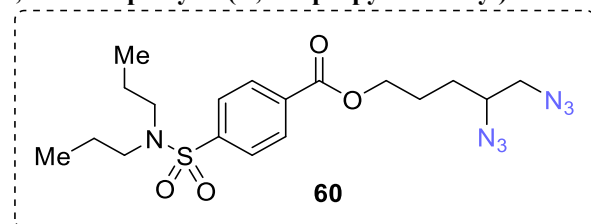

Prepared according to General Procedure A and obtained as colorless oil. **Yield** 71%, 31.0mg. Purification is through preparatory thin-layer chromatography (with eluent of Hex:EA = 3:1) to give the corresponding diazidation products.

**<sup>1</sup>H NMR (600 MHz, CDCl<sub>3</sub>)** δ 8.15 (d, *J* = 8.4 Hz, 2H), 7.89 (d, *J* = 8.4 Hz, 2H), 4.45 – 4.35 (m, 2H), 3.59-3.52 (m, 1H), 3.47 (dd, *J* = 12.7, 4.2 Hz, 1H), 3.40 (dd, *J* = 12.7, 7.1 Hz, 1H), 3.14 – 3.06 (m, 4H), 2.03-1.95 (m, 1H), 1.94-1.85 (m, 1H), 1.76 – 1.63 (m, 2H), 1.60-1.50 (m, 4H), 0.87 (t, *J* = 7.4 Hz, 6H).

**<sup>13</sup>C NMR (151 MHz, CDCl<sub>3</sub>)** δ 165.18, 144.35, 133.30, 130.22, 127.05, 64.80, 61.51, 54.80, 49.90, 28.44, 25.24, 21.92, 11.16.

HRMS APCI: [M+H]<sup>+</sup> calcd. for C<sub>18</sub>H<sub>28</sub>N<sub>7</sub>O<sub>4</sub>S: 438.1918; Found 438.1908

#### (2*S*,4*R*)-1,7,7-trimethylbicyclo[2.2.1]heptan-2-yl 4,5-diazidopentanoate

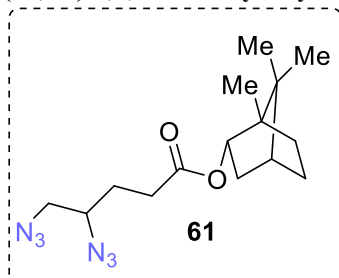

Prepared according to General Procedure A and obtained as colorless oil. **Yield** 59%, 18.9 mg. Purification is through preparatory column chromatography (with eluent of Hex: EA = 10:1) to give the corresponding diazidation products.

**<sup>1</sup>H NMR (600 MHz, CDCl<sub>3</sub>)** δ 4.93-4.87 (m, 1H), 3.61-3.52 (m, 1H), 3.45 (dd, *J* = 12.7, 4.1 Hz, 1H), 3.36 (dd, *J* = 12.7, 7.3 Hz, 1H), 2.53-2.44 (m, 2H), 2.40-2.31 (m, 1H), 1.95-1.86 (m, 2H), 1.83 – 1.72 (m, 2H), 1.72-1.66 (m, 1H), 1.35 – 1.26 (m, 1H), 1.26-1.19 (m, 1H), 0.98-0.93 (m, 1H), 0.90 (s, 3H), 0.87 (s, 3H), 0.83 (d, *J* = 2.4 Hz, 3H).

**<sup>13</sup>C NMR (151 MHz, CDCl<sub>3</sub>)** δ 172.75, 80.42, 61.23, 54.90, 48.78, 47.85, 44.86, 36.80, 30.68, 28.05, 28.03, 27.16, 27.15, 27.12, 19.70, 18.83, 13.54.

HRMS APCI: [M+H]<sup>+</sup> calcd. for C<sub>15</sub>H<sub>25</sub>N<sub>6</sub>O<sub>2</sub>: 321.2034; Found 321.2030

**(1*R*,2*S*,5*R*)-2-isopropyl-5-methylcyclohexyl 4,5-diazidopentanoate**

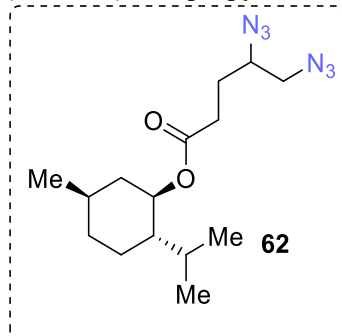

Prepared according to General Procedure A and obtained as colorless oil. **Yield** 42%, 13.5 mg. Purification is through preparatory column chromatography (with eluent of Hex: EA = 10:1) to give the corresponding diazidation products.

**<sup>1</sup>H NMR (600 MHz, CDCl<sub>3</sub>)** δ 4.77-4.64 (m, 1H), 3.60-3.53 (m, 1H), 3.45 (dd, *J* = 12.8, 4.1 Hz, 1H), 3.36 (dd, *J* = 12.7, 7.4 Hz, 1H), 2.51-2.38 (m, 2H), 2.00-1.93 (m, 1H), 1.93-1.80 (m, 2H), 1.79-1.72 (m, 1H), 1.71-1.65 (m, 2H), 1.52-1.45 (m, 1H), 1.41-1.33 (m, 1H), 1.09 – 0.96 (m, 2H), 0.91-0.86 (m, 7H), 0.76 (dd, *J* = 7.0, 2.2 Hz, 3H).

**<sup>13</sup>C NMR (151 MHz, CDCl<sub>3</sub>)** δ 172.02, 74.69 (d, *J* = 2.8 Hz), 61.24 (d, *J* = 3.1 Hz), 54.91, 46.99 (d, *J* = 2.1 Hz), 40.91 (d, *J* = 5.0 Hz), 34.20, 31.40, 30.69, 27.14 (d, *J* = 4.9 Hz), 26.36 (d, *J* = 5.4 Hz), 23.41 (d, *J* = 1.9 Hz), 22.01, 20.75 (d, *J* = 2.4 Hz), 16.31 (d, *J* = 2.7 Hz).

HRMS APCI: [M-N<sub>2</sub>+H]<sup>+</sup> calcd. for C<sub>19</sub>H<sub>27</sub>N<sub>4</sub>O<sub>2</sub>: 295.2129; Found 295.2124

**(4*R*,5*R*,6*R*)-6-(1,2-diazidopropan-2-yl)-4,5-dimethyl-4,4a,5,6,7,8-hexahydronaphthalen-2(3*H*)-on**

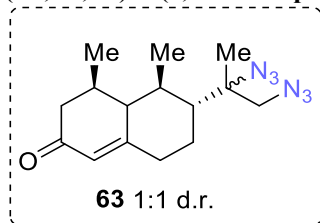

Prepared according to General Procedure A and obtained as colorless oil in a mixture of isomers. **Yield** 60%, 18.1 mg. d.r. 1:1. Purification is through preparatory thin-layer chromatography (with eluent of Hex: EA = 2:1) to give the corresponding diazidation products.

**<sup>1</sup>H NMR (600 MHz, CDCl<sub>3</sub>)** δ 5.80-5.70 (m, 1H), 3.45-3.31 (m, 2H), 2.53 – 2.43 (m, 1H), 2.43-2.35 (m, 1H), 2.31 – 2.20 (m, 2H), 2.04 – 1.91 (m, 3H), 1.91 – 1.81 (m, 1H), 1.28 – 1.21 (m, 3H), 1.24-1.07 (m, 3H), 1.01-0.96 (m, 3H).

**<sup>13</sup>C NMR (151 MHz, CDCl<sub>3</sub>)** δ 199.32, 199.25, 169.06, 169.04, 124.84, 65.90, 65.75, 58.08, 57.73, 41.99, 40.49, 39.23, 39.20, 39.00, 38.77, 32.54, 32.48, 27.33, 27.13, 18.27, 17.97, 16.86, 16.81, 15.00, 14.98.

HRMS APCI: [M+H]<sup>+</sup> calcd. for C<sub>15</sub>H<sub>23</sub>N<sub>6</sub>O: 303.1928; Found 303.1922

**benzyl 9,10-diazidooctadecanoate**

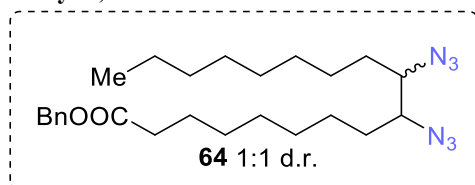

Prepared according to General Procedure A and obtained as colorless oil in the mixture of two isomers. **Yield** 70%, 31.9 mg. d.r. = 1:1. Purification is through preparatory thin-layer chromatography (with eluent of Hex: EA = 15:1) to give the corresponding diazidation products.

**<sup>1</sup>H NMR (600 MHz, CDCl<sub>3</sub>)** δ 7.39 – 7.30 (m, 5H), 5.12 (s, 2H), 3.32 (h, *J* = 4.9 Hz, 1H), 3.25 (dq, *J* = 6.7, 4.3 Hz, 1H), 2.36 (t, *J* = 7.5 Hz, 2H), 1.69-1.28 (m, 24H), 0.89 (t, *J* = 7.0 Hz, 3H).

**<sup>13</sup>C NMR (151 MHz, CDCl<sub>3</sub>)** δ 173.64, 136.06, 128.55, 128.19, 66.11, 65.86, 65.82, 65.24, 65.20, 34.25, 31.82, 31.26, 31.24, 30.36, 30.28, 29.39, 29.35, 29.33, 29.19, 29.14, 29.04, 28.96, 26.31, 26.25, 26.19, 26.12, 24.84, 22.65, 14.12.

The compound characterization was reported in literature.<sup>6</sup>

**(1*R*,5*R*,7*S*)-7-(2,2-dimethyl-1,3-dioxolan-4-yl)-3,3-dimethyl-2,4,6-trioxabicyclo[3.2.1]octan-5-yl 4,5-diazidopentanoate**

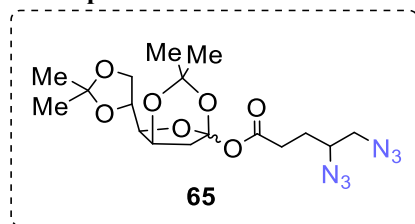

Prepared according to General Procedure A and obtained as colorless oil.

**Yield** 49%, 20.9 mg. Purification is through preparatory column chromatography (with eluent of Hex: EA = 2:1) to give the corresponding diazidation products.

**<sup>1</sup>H NMR (600 MHz, CDCl<sub>3</sub>)** δ 6.16 (d, *J* = 2.1 Hz, 1H), 4.87 (dd, *J* = 5.9, 3.6 Hz, 1H), 4.71 (dd, *J* = 5.9, 2.1 Hz, 1H), 4.45-4.36 (m, 1H), 4.13 – 4.07 (m, 1H), 4.07-4.01 (m, 2H), 3.62-3.54 (m, 1H), 3.47 (dt, *J* = 12.7, 4.0 Hz, 1H), 3.38 (dd, *J* = 12.7, 7.3 Hz, 1H), 2.54 – 2.43 (m, 2H), 1.96 – 1.85 (m, 1H), 1.80 – 1.71 (m, 1H), 1.49 (s, 3H), 1.47 (s, 3H), 1.38 (s, 3H), 1.35 (s, 3H).

**<sup>13</sup>C NMR (151 MHz, CDCl<sub>3</sub>)** δ 171.02 (d, *J* = 3.3 Hz), 113.36, 109.41, 101.01 (d, *J* = 4.7 Hz), 85.01, 82.33 (d, *J* = 5.5 Hz), 79.25 (d, *J* = 2.7 Hz), 72.83 (d, *J* = 2.3 Hz), 66.78 (d, *J* = 4.7 Hz), 60.95 (d, *J* = 12.0 Hz), 54.84 (d, *J* = 3.2 Hz), 30.31 (d, *J* = 17.4 Hz), 27.00 (d, *J* = 1.9 Hz), 26.72 (d, *J* = 9.8 Hz), 25.93, 25.12 (d, *J* = 2.3 Hz), 24.63 (d, *J* = 2.1 Hz).

HRMS APCI: [M-N<sub>2</sub>+H]<sup>+</sup> calcd. for C<sub>17</sub>H<sub>27</sub>N<sub>4</sub>O<sub>7</sub>: 399.1874; Found 399.1864

**benzyl (2*S*,4*aS*,6*aS*,6*bR*,8*aR*,10*S*,12*aS*,12*bR*,14*bR*)-10-((4,5-diazidopentanoyl)oxy)-2,4*a*,6*a*,6*b*,9,9,12*a*-heptamethyl-13-oxo-1,2,3,4,4*a*,5,6,6*a*,6*b*,7,8,8*a*,9,10,11,12,12*a*,12*b*,13,14*b*-icosahydricene-2-carboxylate**

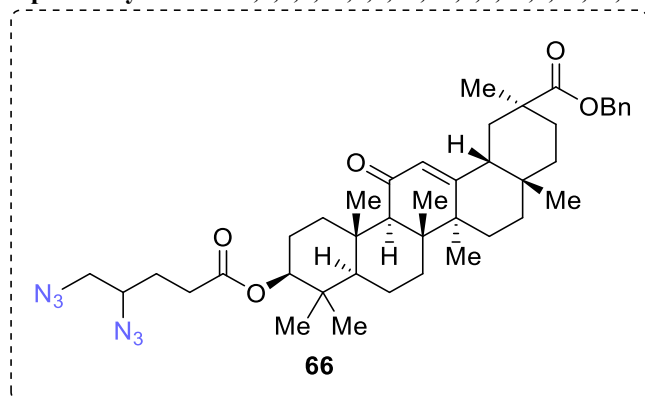

Prepared according to General Procedure A and

obtained as white solid. **Yield** 51%, 37.0 mg. Purification is through preparatory thin-layer chromatography (with eluent of Hex: EA = 2:1) to give the corresponding diazidation products.

**<sup>1</sup>H NMR (600 MHz, CDCl<sub>3</sub>)** δ 7.43 – 7.31 (m, 5H), 5.55 (s, 1H), 5.20 (d, *J* = 12.2 Hz, 1H), 5.09 (d, *J* = 12.2 Hz, 1H), 4.54 (dd, *J* = 11.8, 4.6 Hz, 1H), 3.62-3.52 (m, 1H), 3.46 (dd, *J* = 12.7, 4.1 Hz, 1H), 3.37 (dd, *J* = 12.9, 7.2 Hz, 1H), 2.84-2.76 (m, 1H), 2.54 – 2.41 (m, 2H), 2.34 (s, 1H), 2.06-1.97 (m, 3H), 1.97 – 1.87 (m, 2H), 1.84 – 1.74 (m, 2H), 1.74 – 1.63 (m, 3H), 1.57 (s, 1H), 1.48 – 1.28 (m, 9H), 1.19-1.14 (m, 7H), 1.11 (s, 3H), 1.07 – 0.98 (m, 2H), 0.91 – 0.86 (m, 6H), 0.82-0.78 (m, 1H), 0.73 (s, 3H).

**<sup>13</sup>C NMR (151 MHz, CDCl<sub>3</sub>)** δ 200.03, 176.23, 172.24, 172.22, 169.21, 169.20, 136.09, 128.61, 128.42, 128.30, 128.24, 81.14, 66.22, 61.63, 61.19, 54.96, 54.87, 48.20, 45.34, 43.98, 43.14, 41.00, 38.72, 38.06, 37.61, 36.87, 32.63, 31.76, 31.13, 30.77, 30.68, 29.70, 28.41, 28.28, 28.10, 27.13, 27.07, 26.42, 26.35, 23.59, 23.55, 23.29, 18.63, 17.34, 16.76, 16.41.

The compound characterization was reported in literature.<sup>6</sup>

**4,5-dichloropentyl 2-(4-((2-oxocyclopentyl)methyl)phenyl)propanoate**

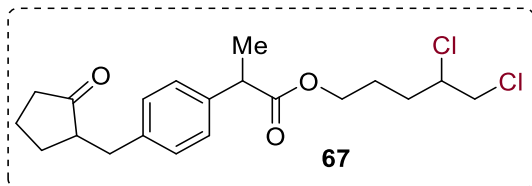

Prepared according to General Procedure B and obtained as colorless oil. **Yield** 72%, 27.7 mg. Purification is through preparatory thin-layer chromatography (with eluent of Hex: EA = 5:1) to give the corresponding dichlorination products.

**<sup>1</sup>H NMR (600 MHz, CDCl<sub>3</sub>)** δ 7.24 – 7.19 (m, 2H), 7.15 – 7.09 (m, 2H), 4.18 – 4.05 (m, 2H), 4.00 – 3.92 (m, 1H), 3.75 – 3.66 (m, 2H), 3.61 – 3.51 (m, 1H), 3.13 (dd, *J* = 14.0, 4.1 Hz, 1H), 2.50 (dd, *J* = 13.9, 9.6 Hz, 1H), 2.39 – 2.29 (m, 2H), 2.16 – 2.06 (m, 2H), 2.00–1.92 (m, 2H), 1.90–1.83 (m, 1H), 1.78–1.69 (m, 2H), 1.59–1.51 (m, 1H), 1.49 (d, *J* = 7.1 Hz, 3H).

**<sup>13</sup>C NMR (151 MHz, CDCl<sub>3</sub>)** δ 220.31, 174.58, 138.97, 138.96, 138.29, 129.17, 127.54, 63.76, 63.67, 60.38, 60.35, 51.04, 47.97, 45.14, 38.21, 35.20, 31.56, 31.48, 29.29, 25.08, 20.56, 18.35, 18.33.

HRMS APCI: [M+H]<sup>+</sup> calcd. for C<sub>20</sub>H<sub>27</sub>Cl<sub>2</sub>O<sub>3</sub>: 385.1332; Found 385.1330

#### 4,5-dichloropentyl 4-(*N,N*-dipropylsulfamoyl)benzoate

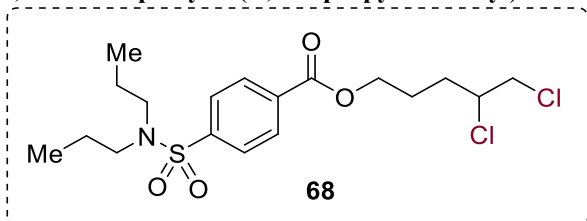

Prepared according to General Procedure B and obtained as colorless oil. **Yield** 65%, 27.5 mg. Purification is through preparatory thin-layer chromatography (with eluent of Hex: EA = 3:1) to give the corresponding dichlorination products.

**<sup>1</sup>H NMR (600 MHz, CDCl<sub>3</sub>)** δ 8.19 – 8.13 (m, 2H), 7.92 – 7.85 (m, 2H), 4.45 – 4.37 (m, 2H), 4.16 – 4.09 (m, 1H), 3.82 (dd, *J* = 11.3, 4.9 Hz, 1H), 3.68 (dd, *J* = 11.3, 8.0 Hz, 1H), 3.15 – 3.06 (m, 4H), 2.26–2.18 (m, 1H), 2.16 – 2.06 (m, 1H), 1.99 – 1.84 (m, 2H), 1.60 – 1.49 (m, 4H), 0.87 (t, *J* = 7.4 Hz, 6H).

**<sup>13</sup>C NMR (151 MHz, CDCl<sub>3</sub>)** δ 165.19, 144.30, 133.36, 130.21, 127.04, 64.69, 60.26, 49.91, 47.85, 31.62, 25.17, 21.92, 11.16.

HRMS APCI: [M+H]<sup>+</sup> calcd. for C<sub>18</sub>H<sub>28</sub>Cl<sub>2</sub>NO<sub>4</sub>S: 424.1111; Found 424.1106

#### 4,5-dichloropentyl 2-(2,4-dichlorophenoxy)acetate

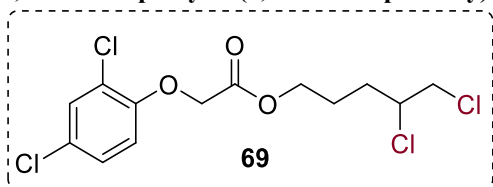

Prepared according to General Procedure B and obtained as colorless oil. **Yield** 82%, 29.5 mg. Purification is through preparatory thin-layer chromatography (with eluent of Hex: EA = 10:1) to give the corresponding dichlorination products.

**<sup>1</sup>H NMR (600 MHz, CDCl<sub>3</sub>)** δ 7.39 (t, *J* = 2.1 Hz, 1H), 7.17 (dt, *J* = 8.9, 2.1 Hz, 1H), 6.78 (dd, *J* = 8.8, 1.6 Hz, 1H), 4.70 (s, 2H), 4.28 – 4.19 (m, 2H), 4.02 (ddt, *J* = 12.4, 7.9, 3.8 Hz, 1H), 3.76 (ddd, *J* = 11.5, 4.9, 1.6 Hz, 1H), 3.65 – 3.52 (m, 1H), 2.09–2.00 (m, 1H), 1.99–1.88 (m, 1H), 1.84 – 1.76 (m, 1H), 1.76 – 1.68 (m, 1H).

**<sup>13</sup>C NMR (151 MHz, CDCl<sub>3</sub>)** δ 168.10, 152.36, 130.43, 127.60, 127.18, 124.27, 114.62, 66.34, 64.68, 60.23, 47.88, 31.51, 25.09.

HRMS APCI: [M+H]<sup>+</sup> calcd. for C<sub>13</sub>H<sub>15</sub>Cl<sub>4</sub>O<sub>3</sub>: 358.9770; Found 358.9768

#### 4,5-dichloropentyl 2-(4-chlorophenoxy)-2-methylpropanoate

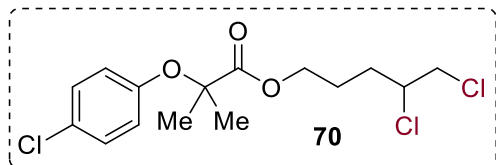

Prepared according to General Procedure B and obtained as colorless oil. **Yield** 79%, 27.9 mg. Purification is through preparatory thin-layer chromatography (with eluent of Hex: EA = 10:1) to give the corresponding dichlorination products.

**<sup>1</sup>H NMR (600 MHz, CDCl<sub>3</sub>)** δ 7.20 (d, *J* = 9.0 Hz, 2H), 6.77 (d, *J* = 8.9 Hz, 2H), 4.24 – 4.16 (m, 2H), 4.01-3.92 (m, 1H), 3.71 (dd, *J* = 11.3, 5.0 Hz, 1H), 3.55 (dd, *J* = 11.3, 7.8 Hz, 1H), 1.97 – 1.88 (m, 2H), 1.79-1.69 (m, 1H), 1.65-1.58 (m, 7H).

**<sup>13</sup>C NMR (151 MHz, CDCl<sub>3</sub>)** δ 173.96, 154.10, 129.20, 127.16, 120.14, 79.45, 64.60, 60.27, 47.87, 31.48, 25.38, 25.35, 25.08.

HRMS APCI: [M+H]<sup>+</sup> calcd. for C<sub>13</sub>H<sub>20</sub>Cl<sub>3</sub>O<sub>3</sub>: 353.0473; Found 353.0468

#### (2*S*,4*R*)-1,7,7-trimethylbicyclo[2.2.1]heptan-2-yl 4,5-dichloropentanoate

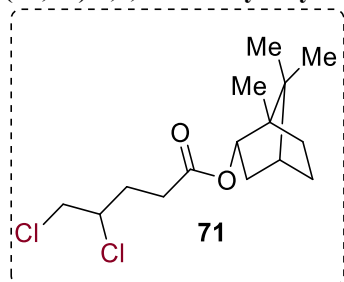

Prepared according to General Procedure B and obtained as colorless oil. **Yield** 69%, 21.2 mg. Purification is through preparatory column chromatography (with eluent of Hex: EA = 10:1) to give the corresponding dichlorination products.

**<sup>1</sup>H NMR (600 MHz, CDCl<sub>3</sub>)** δ 4.91 (dq, *J* = 8.9, 3.1 Hz, 1H), 4.18 – 4.08 (m, 1H), 3.81 (dd, *J* = 11.4, 5.0 Hz, 1H), 3.67 (dd, *J* = 11.4, 7.6 Hz, 1H), 2.65 – 2.51 (m, 2H), 2.48 – 2.33 (m, 2H), 2.05 – 1.90 (m, 2H), 1.80-1.71 (m, 1H), 1.71-1.66 (m, 1H), 1.35-1.28 (m, 1H), 1.24-1.19 (m, 1H), 0.97 (dd, *J* = 13.8, 3.5 Hz, 1H), 0.91 (s, 3H), 0.88 (s, 3H), 0.84 (s, 3H).

**<sup>13</sup>C NMR (151 MHz, CDCl<sub>3</sub>)** δ 172.76, 80.34, 80.31, 60.08, 60.06, 48.75, 48.02, 47.81, 44.82, 36.79, 36.74, 30.91, 30.40, 30.37, 28.01, 27.09, 19.69, 18.82, 13.55, 13.54.

HRMS ESI: [M+H]<sup>+</sup> calcd. for C<sub>15</sub>H<sub>25</sub>Cl<sub>2</sub>O<sub>2</sub>: 307.1226; Found 307.1667

#### 5-(1,2-dichloroethyl)-3-(3,5-dichlorophenyl)-5-methyloxazolidine-2,4-dione

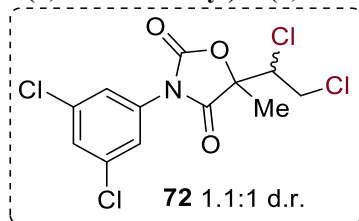

Prepared according to General Procedure B and obtained as colorless oil in the mixture of two isomers. **Yield** 86%, 30.7 mg. d.r. = 1.1:1. Purification is through preparatory thin-layer chromatography (with eluent of Hex: EA = 3:1) to give the corresponding dichlorination products.

**<sup>1</sup>H NMR (600 MHz, CDCl<sub>3</sub>)** δ 7.63 – 7.28 (m, 3H), 4.50 – 4.43 (m, 1H), 4.08 (dd, *J* = 12.4, 4.7 Hz, 0.50H), 4.02 (dd, *J* = 12.2, 6.8 Hz, 0.55H), 3.93 (dd, *J* = 12.2, 7.0 Hz, 0.56H), 3.83 (dd, *J* = 12.4, 7.6 Hz, 0.50H), 1.84 (d, *J* = 16.0 Hz, 3H).

**<sup>13</sup>C NMR (151 MHz, CDCl<sub>3</sub>)** δ 170.71, 170.69, 151.79, 151.63, 135.73, 132.20, 132.13, 129.46, 129.44, 123.89, 123.85, 85.53, 84.79, 62.96, 62.45, 43.18, 42.77, 22.04, 20.21.

HRMS APCI: [M+H]<sup>+</sup> calcd. for C<sub>12</sub>H<sub>10</sub>Cl<sub>4</sub>NO<sub>3</sub>: 355.9409; Found 355.9405

#### (1*R*,2*S*,5*R*)-2-isopropyl-5-methylcyclohexyl 4,5-dichloropentanoate

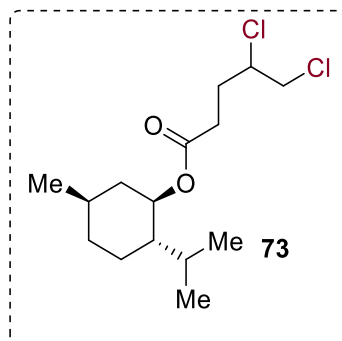

Prepared according to General Procedure B and obtained as colorless oil. **Yield** 50%, 15.5 mg. Purification is through preparatory column chromatography (with eluent of Hex: EA = 10:1) to give the corresponding dichlorination products.

**<sup>1</sup>H NMR (600 MHz, CDCl<sub>3</sub>)** δ 4.76-4.66 (m, 1H), 4.17-4.08 (m, 1H), 3.79 (ddd, *J* = 11.4, 5.0, 1.5 Hz, 1H), 3.66 (dd, *J* = 11.4, 7.5 Hz, 1H), 2.61 – 2.46 (m, 2H), 2.43 – 2.36 (m, 1H), 2.02 – 1.92 (m, 2H), 1.89-1.80 (m, 1H), 1.74-1.63 (m, 2H), 1.52-1.44 (m, 1H), 1.41-1.34 (m, 1H), 1.11 – 0.97 (m, 2H), 0.95 – 0.82 (m, 7H), 0.76 (dd, *J* = 7.0, 2.0 Hz, 3H).

**<sup>13</sup>C NMR (151 MHz, CDCl<sub>3</sub>)** δ 172.01 (d, *J* = 3.3 Hz), 74.61, 60.10 (d, *J* = 7.4 Hz), 48.06, 46.99 (d, *J* = 2.5 Hz), 40.91 (d, *J* = 2.8 Hz), 34.22, 31.40, 30.95, 30.43 (d, *J* = 6.0 Hz), 26.32 (d, *J* = 6.2 Hz), 23.43 (d, *J* = 6.8 Hz), 22.02, 20.76 (d, *J* = 3.2 Hz), 16.33 (d, *J* = 4.6 Hz).

HRMS APCI: [M+Na]<sup>+</sup> calcd. for C<sub>15</sub>H<sub>26</sub>Cl<sub>2</sub>NaO<sub>2</sub>: 331.1202; Found 331.1198

**(8*R*,9*S*,13*S*,14*S*)-13-methyl-17-oxo-7,8,9,11,12,13,14,15,16,17-decahydro-6*H*-cyclopenta[*a*]phenanthren-3-yl 4,5-dichloropentanoate**

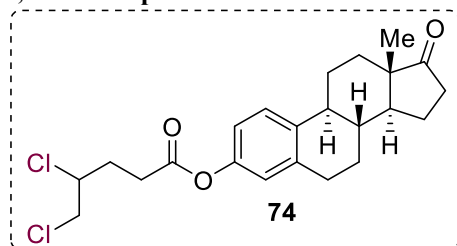

Prepared according to General Procedure B and obtained as white solid. **Yield** 56%, 23.7 mg. Purification is through preparatory thin-layer chromatography (with eluent of Hex: EA = 5:1) to give the corresponding dichlorination products.

**<sup>1</sup>H NMR (600 MHz, CDCl<sub>3</sub>)** δ 7.32-7.27 (m, 1H), 6.89 – 6.80 (m, 2H), 4.25-4.17 (m, 1H), 3.83 (dd, *J* = 11.4, 4.9 Hz, 1H), 3.70 (dd, *J* = 11.4, 7.7 Hz, 1H), 2.95 – 2.89 (m, 2H), 2.89-2.81 (m, 1H), 2.81-2.74 (m, 1H), 2.55 – 2.47 (m, 2H), 2.46 – 2.38 (m, 1H), 2.33-2.26 (td, *J* = 10.9, 4.3 Hz, 1H), 2.19 – 1.94 (m, 5H), 1.68 – 1.62 (m, 2H), 1.58 – 1.41 (m, 4H), 0.91 (s, 3H).

**<sup>13</sup>C NMR (151 MHz, CDCl<sub>3</sub>)** δ 171.38, 148.37, 138.12, 137.57, 126.50, 121.50, 118.66, 59.86, 50.41, 47.97, 44.15, 37.98, 35.89, 31.54, 30.74, 30.26, 29.43, 26.33, 25.76, 21.61, 13.85.

HRMS ESI: [M+H]<sup>+</sup> calcd. for C<sub>23</sub>H<sub>29</sub>Cl<sub>2</sub>O<sub>3</sub>: 423.1488; Found 423.1429

**1-chloro-2-fluorododecane**

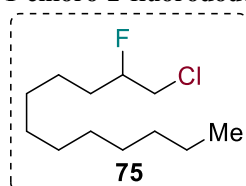

Prepared according to General Procedure C and obtained as colorless oil. **Yield** 63%, 16.7 mg. Yield is referred to equivalent of olefin. Purification is through flash column chromatography (with eluent of Hexane) to give the corresponding fluorochlorination products.

**<sup>1</sup>H NMR (600 MHz, CDCl<sub>3</sub>)** δ 4.72-4.57 (m, 1H), 3.69 – 3.55 (m, 2H), 1.79 – 1.61 (m, 2H), 1.50 – 1.42 (m, 1H), 1.42 – 1.25 (m, 15H), 0.88 (t, *J* = 7.0 Hz, 3H).



$^{13}\text{C}$  NMR (151 MHz,  $\text{CDCl}_3$ )  $\delta$  92.50 (d,  $J = 174.5$  Hz), 45.87 (d,  $J = 25.4$  Hz), 32.40 (d,  $J = 20.5$  Hz), 31.90, 29.58, 29.52, 29.42, 29.32, 29.30, 24.69 (d,  $J = 4.1$  Hz), 22.69, 14.14.

$^{19}\text{F}$  NMR (565 MHz,  $\text{CDCl}_3$ )  $\delta$  -172.53 – -189.11 (m).

HRMS ESI:  $[\text{M}+\text{Na}]^+$  calcd. for  $\text{C}_{12}\text{H}_{24}\text{ClFNa}$ : 245.1443; Found 245.2320

#### (4-chloro-3-fluorobutyl)benzene

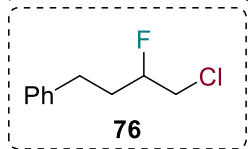

Prepared according to General Procedure C and obtained as colorless oil. **Yield** 45%, 10.2 mg. Yield is referred to equivalent of olefin. Purification is through preparatory thin-layer chromatography (with eluent of Hexane) to give the corresponding fluorochlorination products.

$^1\text{H}$  NMR (600 MHz,  $\text{CDCl}_3$ )  $\delta$  7.31 (t,  $J = 7.6$  Hz, 2H), 7.24 – 7.16 (m, 3H), 4.71 – 4.58 (m, 1H), 3.66-3.59 (m, 2H), 2.90-2.79 (m, 1H), 2.79-2.68 (m, 1H), 2.15 – 2.06 (m, 1H), 2.03 – 1.89 (m, 1H).

$^{13}\text{C}$  NMR (151 MHz,  $\text{CDCl}_3$ )  $\delta$  140.59, 128.57, 128.45, 126.25, 91.35 (d,  $J = 175.4$  Hz), 45.76 (d,  $J = 25.4$  Hz), 34.11 (d,  $J = 20.7$  Hz), 30.85 (d,  $J = 4.3$  Hz).

$^{19}\text{F}$  NMR (565 MHz,  $\text{CDCl}_3$ )  $\delta$  -174.72 – -189.52 (m).

GC-MS:  $[\text{M}]^+$  calcd. for  $\text{C}_{10}\text{H}_{12}\text{ClF}$ : 186.0612; Found 186

#### 5-chloro-4-fluoropentyl benzoate

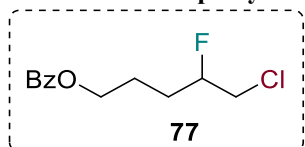

Prepared according to General Procedure C and obtained as colorless oil. **Yield** 58%, 17.1 mg. Yield is referred to equivalent of olefin. Purification is through preparatory thin-layer chromatography (with eluent of Hex: EA = 10:1) to give the corresponding fluorochlorination products.

$^1\text{H}$  NMR (600 MHz,  $\text{CDCl}_3$ )  $\delta$  8.08 – 7.99 (m, 2H), 7.61 – 7.53 (m, 1H), 7.45 (t,  $J = 7.8$  Hz, 2H), 4.81 – 4.67 (m, 1H), 4.44 – 4.32 (m, 2H), 3.71 – 3.60 (m, 2H), 2.06-1.96 (m, 1H), 1.96 – 1.83 (m, 3H).

$^{13}\text{C}$  NMR (151 MHz,  $\text{CDCl}_3$ )  $\delta$  166.54, 133.04, 130.09, 129.55, 128.41, 91.88 (d,  $J = 175.5$  Hz), 64.20, 45.52 (d,  $J = 25.6$  Hz), 29.16 (d,  $J = 20.8$  Hz), 24.24 (d,  $J = 4.1$  Hz).

$^{19}\text{F}$  NMR (565 MHz,  $\text{CDCl}_3$ )  $\delta$  -182.39 – -182.93 (m).

HRMS APCI:  $[\text{M}+\text{H}]^+$  calcd. for  $\text{C}_{12}\text{H}_{15}\text{ClFO}_2$ : 245.0739; Found 245.0738

#### 5-chloro-4-fluoropentyl 4-chlorobenzoate

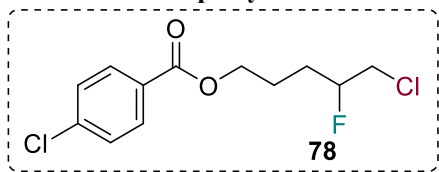

Prepared according to General Procedure C and obtained as colorless oil. **Yield** 55%, 18.4 mg. Yield is referred to equivalent of olefin. Purification is through preparatory thin-layer chromatography (with eluent of Hex: EA = 10:1) to give the corresponding fluorochlorination products.

$^1\text{H}$  NMR (600 MHz,  $\text{CDCl}_3$ )  $\delta$  8.00 – 7.93 (m, 2H), 7.46 – 7.39 (m, 2H), 4.81 – 4.65 (m, 1H), 4.43 – 4.32 (m, 2H), 3.66 (dd,  $J = 19.1, 5.0$  Hz, 2H), 2.05-1.96 (m, 1H), 1.96 – 1.81 (m, 3H).

$^{13}\text{C}$  NMR (151 MHz,  $\text{CDCl}_3$ )  $\delta$  165.67, 139.48, 130.95, 128.77, 128.53, 91.83 (d,  $J = 175.7$  Hz), 64.46, 45.46 (d,  $J = 25.9$  Hz), 29.10 (d,  $J = 21.1$  Hz), 24.20 (d,  $J = 4.1$  Hz).

$^{19}\text{F}$  NMR (565 MHz,  $\text{CDCl}_3$ )  $\delta$  -179.52 – -186.92 (m).

HRMS APCI:  $[\text{M}+\text{H}]^+$  calcd. for  $\text{C}_{12}\text{H}_{14}\text{Cl}_2\text{FO}_2$ : 279.0349; Found 279.0349

#### 5-chloro-4-fluoropentyl 4-ethylbenzoate

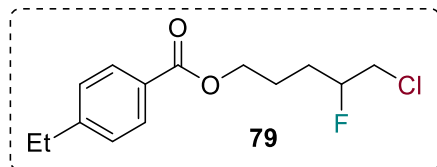

Prepared according to General Procedure C and obtained as colorless oil.

**Yield** 48%, 15.8 mg. Yield is referred to equivalent of olefin. Purification is through preparatory thin-layer chromatography (with eluent of Hex: EA = 10:1) to give the corresponding fluorochlorination products.

**<sup>1</sup>H NMR (600 MHz, CDCl<sub>3</sub>)** δ 7.99 – 7.90 (m, 2H), 7.30-7.24 (m, 2H), 4.80 – 4.66 (m, 1H), 4.42 – 4.29 (m, 2H), 3.70 – 3.59 (m, 2H), 2.71 (q, *J* = 7.6 Hz, 2H), 2.03-1.95 (m, 1H), 1.94 – 1.81 (m, 3H), 1.26 (t, *J* = 7.6 Hz, 4H).

**<sup>13</sup>C NMR (151 MHz, CDCl<sub>3</sub>)** δ 166.62, 149.92, 129.68, 127.94, 127.56, 91.90 (d, *J* = 175.5 Hz), 64.00, 45.54 (d, *J* = 25.6 Hz), 29.17 (d, *J* = 21.1 Hz), 28.96, 24.26 (d, *J* = 4.2 Hz), 15.27.

**<sup>19</sup>F NMR (565 MHz, CDCl<sub>3</sub>)** δ -177.12 – -190.41 (m).

HRMS APCI: [M+H]<sup>+</sup> calcd. for C<sub>14</sub>H<sub>19</sub>ClFO<sub>2</sub>: 273.1052; Found 273.1050

#### 5-chloro-4-fluoropentyl 4-methylbenzenesulfonate

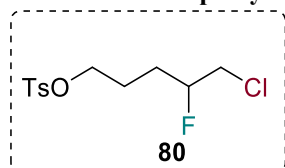

Prepared according to General Procedure C and obtained as colorless oil. **Yield** 59%,

20.9 mg. Yield is referred to equivalent of olefin. Purification is through preparatory thin-layer chromatography (with eluent of Hex: EA = 6:1) to give the corresponding fluorochlorination products.

**<sup>1</sup>H NMR (600 MHz, CDCl<sub>3</sub>)** δ 7.79 (d, *J* = 8.3 Hz, 2H), 7.36 (d, *J* = 8.1 Hz, 2H), 4.68-4.50 (m, 1H), 4.14-4.02 (m, 2H), 3.58 (dd, *J* = 19.3, 5.0 Hz, 2H), 2.46 (s, 3H), 1.92 – 1.83 (m, 1H), 1.82 – 1.71 (m, 3H).

**<sup>13</sup>C NMR (151 MHz, CDCl<sub>3</sub>)** δ 144.97, 132.81, 129.93, 127.89, 91.52 (d, *J* = 175.6 Hz), 69.64, 45.41 (d, *J* = 25.4 Hz), 28.50 (d, *J* = 20.9 Hz), 24.42 (d, *J* = 3.8 Hz), 21.67.

**<sup>19</sup>F NMR (565 MHz, CDCl<sub>3</sub>)** δ -176.71 – -191.51 (m).

HRMS APCI: [M+H]<sup>+</sup> calcd. for C<sub>12</sub>H<sub>17</sub>ClFO<sub>3</sub>S: 295.0565; Found 295.0565

#### *N*-(4-chloro-3-fluorobutyl)-*N*-methylbenzenesulfonamide

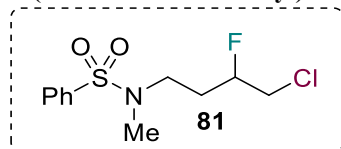

Prepared according to General Procedure C and obtained as colorless oil. **Yield**

58%, 19.2 mg. Yield is referred to equivalent of olefin. Purification is through preparatory thin-layer chromatography (with eluent of Hex: EA = 5:1) to give the corresponding fluorochlorination products.

**<sup>1</sup>H NMR (600 MHz, CDCl<sub>3</sub>)** δ 7.84 – 7.77 (m, 2H), 7.65 – 7.58 (m, 1H), 7.58-7.51 (m, 2H), 4.94 – 4.77 (m, 1H), 3.77 – 3.66 (m, 2H), 3.20 (dt, *J* = 14.2, 7.2 Hz, 1H), 3.12 (dt, *J* = 13.4, 6.4 Hz, 1H), 2.78 (s, 3H), 2.10 – 1.96 (m, 2H).

**<sup>13</sup>C NMR (151 MHz, CDCl<sub>3</sub>)** δ 136.92, 132.84, 129.20, 127.38, 89.52 (d, *J* = 175.1 Hz), 46.28 (d, *J* = 5.0 Hz), 45.54 (d, *J* = 24.6 Hz), 35.48, 30.83 (d, *J* = 21.0 Hz).

**<sup>19</sup>F NMR (565 MHz, CDCl<sub>3</sub>)** δ -184.27 (dddt, *J* = 46.4, 28.0, 22.1, 18.1 Hz).

HRMS APCI: [M+H]<sup>+</sup> calcd. for C<sub>11</sub>H<sub>16</sub>ClFNO<sub>2</sub>S: 280.0569; Found 280.0568

#### *N*-(4-chloro-3-fluorobutyl)benzenesulfonamide

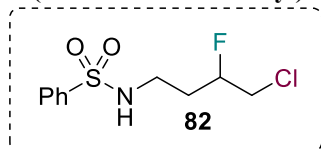

Prepared according to General Procedure C and obtained as colorless oil. **Yield** 53%,

17.0 mg. Yield is referred to equivalent of olefin. Purification is through preparatory thin-layer chromatography (with eluent of Hex: EA = 3:1) to give the corresponding fluorochlorination products.

**<sup>1</sup>H NMR (600 MHz, CDCl<sub>3</sub>)** δ 7.91 – 7.83 (m, 2H), 7.64 – 7.58 (m, 1H), 7.57 – 7.52 (m, 2H), 4.85 (t, *J* = 6.3 Hz, 1H), 4.83 – 4.69 (m, 1H), 3.71 – 3.52 (m, 2H), 3.25 – 3.08 (m, 2H), 1.99 – 1.85 (m, 2H).

**<sup>13</sup>C NMR (151 MHz, CDCl<sub>3</sub>)** δ 139.49, 132.92, 129.28, 127.02, 90.13 (d, *J* = 174.9 Hz), 45.32 (d, *J* = 25.0 Hz), 39.31 (d, *J* = 3.9 Hz), 32.41 (d, *J* = 20.4 Hz).

**<sup>19</sup>F NMR (565 MHz, CDCl<sub>3</sub>)** δ -174.72 – -189.79 (m).

HRMS APCI: [M+H]<sup>+</sup> calcd. for C<sub>10</sub>H<sub>14</sub>ClFNO<sub>2</sub>S: 266.0412; Found 266.0410

### 2-(4-chloro-3-fluorobutyl)isoindoline-1,3-dione

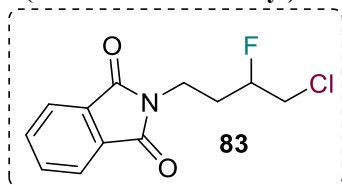

Prepared according to General Procedure C and obtained as white solid. **Yield** 57%,

17.3 mg. Yield is referred to equivalent of olefin. Purification is through preparatory thin-layer chromatography (with eluent of Hex: EA = 5:1) to give the corresponding fluorochlorination products.

**<sup>1</sup>H NMR (600 MHz, CDCl<sub>3</sub>)** δ 7.86 (dd, *J* = 5.4, 3.1 Hz, 2H), 7.74 (dd, *J* = 5.4, 3.1 Hz, 2H), 4.76 (ddq, *J* = 47.6, 8.8, 4.5 Hz, 1H), 3.89 (t, *J* = 6.9 Hz, 2H), 3.68 (dd, *J* = 19.3, 5.0 Hz, 2H), 2.22 – 2.01 (m, 2H).

**<sup>13</sup>C NMR (151 MHz, CDCl<sub>3</sub>)** δ 168.25, 134.14, 131.98, 123.40, 90.30 (d, *J* = 176.0 Hz), 45.31 (d, *J* = 25.4 Hz), 34.11 (d, *J* = 4.4 Hz), 31.34 (d, *J* = 20.5 Hz).

**<sup>19</sup>F NMR (565 MHz, CDCl<sub>3</sub>d)** δ -176.23 – -190.00 (m).

HRMS APCI: [M]<sup>-</sup> calcd. for C<sub>12</sub>H<sub>11</sub>ClFNO<sub>2</sub>: 255.0457; Found 255.0465

### diethyl 2-(3-chloro-2-fluoropropyl)malonate

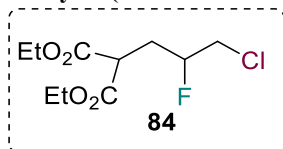

Prepared according to General Procedure C and obtained as colorless oil. **Yield** 48%,

14.7 mg. Yield is referred to equivalent of olefin. Purification is through flash column chromatography (with eluent of Hex: EA = 7:1) to give the corresponding fluorochlorination products.

**<sup>1</sup>H NMR (600 MHz, CDCl<sub>3</sub>)** δ 4.84 – 4.68 (m, 1H), 4.29 – 4.18 (m, 4H), 3.72 – 3.57 (m, 3H), 2.37 – 2.26 (m, 2H), 1.34-1.26 (m, 6H).

**<sup>13</sup>C NMR (151 MHz, CDCl<sub>3</sub>)** δ 168.79, 168.63, 90.01 (d, *J* = 176.4 Hz), 61.85, 47.80, 47.78, 45.43 (d, *J* = 24.8 Hz), 31.67 (d, *J* = 20.3 Hz), 14.02 (d, *J* = 4.3 Hz).

**<sup>19</sup>F NMR (565 MHz, CDCl<sub>3</sub>)** δ -177.32 – -190.00 (m).

HRMS APCI: [M+H]<sup>+</sup> calcd. for C<sub>10</sub>H<sub>17</sub>ClFO<sub>4</sub>: 255.0794; Found 255.0792

### 11-chloro-10-fluoroundecanal

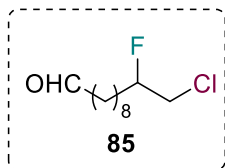

Prepared according to General Procedure C and obtained as colorless oil. **Yield** 50%, 13.3 mg.

Yield is referred to equivalent of olefin. Purification is through flash column chromatography (with eluent of Hex: EA = 10:1) to give the corresponding fluorochlorination products.

**<sup>1</sup>H NMR (600 MHz, CDCl<sub>3</sub>)** δ 9.88 – 9.64 (m, 1H), 4.72 – 4.56 (m, 1H), 3.70 – 3.54 (m, 2H), 2.49-2.38 (m, 2H), 1.78 – 1.61 (m, 4H), 1.49 – 1.31 (m, 10H).

**<sup>13</sup>C NMR (151 MHz, CDCl<sub>3</sub>)** δ 202.85, 92.44 (d, *J* = 174.8 Hz), 45.80 (d, *J* = 25.5 Hz), 43.89, 32.38 (d, *J* = 20.4 Hz), 29.20, 29.17, 29.09, 24.65 (d, *J* = 4.4 Hz), 22.03.

**<sup>19</sup>F NMR (565 MHz, CDCl<sub>3</sub>)** δ -170.34 – -186.44 (m).

GC-MS: [M-H<sub>2</sub>O]<sup>+</sup> calcd. for C<sub>10</sub>H<sub>18</sub>ClF: 204.1081; Found 204

### 11-chloro-10-fluoroundecanoic acid

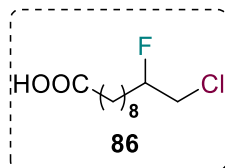

Prepared according to General Procedure C and obtained as colorless oil. **Yield** 54%, 15.5 mg.

Yield is referred to equivalent of olefin. Purification is through flash column chromatography (with eluent of Hex: EA: AcOH = 3:1:0.1) to give the corresponding fluorochlorination products.

**<sup>1</sup>H NMR (600 MHz, CDCl<sub>3</sub>)** δ 4.71 – 4.55 (m, 1H), 3.68 – 3.54 (m, 2H), 2.35 (t, *J* = 7.5 Hz, 2H), 1.78 – 1.61 (m, 4H), 1.51–1.42 (m, 1H), 1.42 – 1.30 (m, 9H).

**<sup>13</sup>C NMR (151 MHz, CDCl<sub>3</sub>)** δ 179.70, 92.48 (d, *J* = 174.5 Hz), 45.86 (d, *J* = 25.5 Hz), 33.96, 32.39 (d, *J* = 20.5 Hz), 29.22, 29.19, 28.98, 24.67 (d, *J* = 4.3 Hz), 24.63.

**<sup>19</sup>F NMR (565 MHz, CDCl<sub>3</sub>)** δ -172.73 – -192.40 (m).

HRMS APCI: [M-H]<sup>-</sup> calcd. for C<sub>11</sub>H<sub>19</sub>ClFO<sub>2</sub>: 237.1052; Found 237.1060

### (3-chloro-2-fluoro-2-methylpropyl)benzene

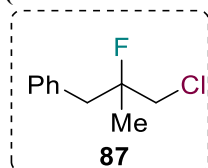

Prepared according to General Procedure C and obtained as colorless oil. **Yield** 56%, 12.5 mg.

Yield is referred to equivalent of olefin. Purification is through preparatory thin-layer chromatography (with eluent of Hexane) to give the corresponding fluorochlorination products.

**<sup>1</sup>H NMR (600 MHz, CDCl<sub>3</sub>)** δ 7.34 – 7.25 (m, 5H), 3.49 (dd, *J* = 14.4, 1.1 Hz, 2H), 3.06 (d, *J* = 20.5 Hz, 2H), 1.42 (d, *J* = 21.5 Hz, 3H).

**<sup>13</sup>C NMR (151 MHz, CDCl<sub>3</sub>)** δ 135.36, 135.33, 130.36, 128.36, 127.00, 95.33 (d, *J* = 176.0 Hz), 48.80 (d, *J* = 30.3 Hz), 43.11 (d, *J* = 21.9 Hz), 22.88 (d, *J* = 23.5 Hz).

**<sup>19</sup>F NMR (565 MHz, CDCl<sub>3</sub>)** δ -130.53 – -164.24 (m).

HRMS ESI: [M+K]<sup>+</sup> calcd. for C<sub>10</sub>H<sub>12</sub>ClFK: 225.0243; Found 225.0693

### 2-chloro-3-fluoro-3-methylbutyl benzoate

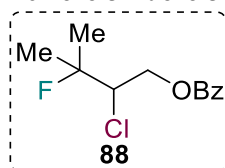

Prepared according to General Procedure C and obtained as colorless oil. **Yield** 53%, 15.4 mg.

Yield is referred to equivalent of olefin. Purification is through preparatory thin-layer chromatography (with eluent of Hex: EA = 10:1) to give the corresponding fluorochlorination products.

**<sup>1</sup>H NMR (600 MHz, CDCl<sub>3</sub>)** δ 8.13 – 8.02 (m, 2H), 7.62 – 7.56 (m, 1H), 7.47 (t, *J* = 7.8 Hz, 2H), 4.78 (ddd, *J* = 12.0, 3.6, 0.8 Hz, 1H), 4.50 (dd, *J* = 11.9, 8.3 Hz, 1H), 4.24 (ddd, *J* = 9.5, 8.3, 3.6 Hz, 1H), 1.65 – 1.48 (m, 1H).

**<sup>13</sup>C NMR (151 MHz, CDCl<sub>3</sub>)** δ 166.21, 133.36, 129.77, 129.56, 128.51, 95.46 (d, *J* = 172.8 Hz), 64.93 (d, *J* = 4.7 Hz), 63.49 (d, *J* = 27.8 Hz), 25.49 (d, *J* = 23.9 Hz), 23.08 (d, *J* = 23.9 Hz).

**<sup>19</sup>F NMR (565 MHz, CDCl<sub>3</sub>)** δ -140.69 (pd, *J* = 22.3, 10.1 Hz).

HRMS ESI: [M+K]<sup>+</sup> calcd. for C<sub>12</sub>H<sub>14</sub>ClFKO<sub>2</sub>: 283.0298; Found 283.2843

### (2-chloro-1-fluoroethyl)benzene

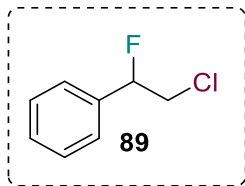

Prepared according to General Procedure C and obtained as colorless oil. **Yield** 33%, 6.3 mg. Yield is referred to equivalent of olefin. Purification is through preparatory thin-layer chromatography (with eluent of Hexane) to give the corresponding fluorochlorination products.

$^1\text{H NMR}$  (600 MHz,  $\text{CDCl}_3$ )  $\delta$  7.47 – 7.34 (m, 5H), 5.60 (ddd,  $J = 47.1, 7.9, 3.8$  Hz, 1H), 3.88 – 3.68 (m, 2H).

$^{13}\text{C NMR}$  (151 MHz,  $\text{CDCl}_3$ )  $\delta$  136.57 (d,  $J = 20.1$  Hz), 129.26 (d,  $J = 1.9$  Hz), 128.72, 125.75 (d,  $J = 6.8$  Hz), 93.07 (d,  $J = 178.2$  Hz), 46.89 (d,  $J = 28.2$  Hz).

$^{19}\text{F NMR}$  (565 MHz,  $\text{CDCl}_3$ )  $\delta$  -178.70 (ddd,  $J = 48.0, 26.4, 15.5$  Hz).

The compound characterization was reported in literature.<sup>15</sup>

### *N,N*-diallyl-4-methylbenzenesulfonamide--3,4-bis(azidomethyl)-1-tosylpyrrolidine

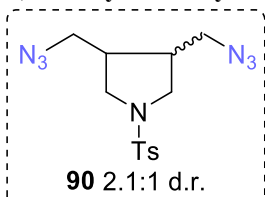

Prepared according to General Procedure A and obtained as colorless oil in the mixture of two isomers. **Yield** 67%, 22.4 mg. d.r. = 2.1:1.

$^1\text{H NMR}$  (600 MHz,  $\text{CDCl}_3$ )  $\delta$  7.72 (dd,  $J = 13.2, 8.0$  Hz, 2H), 7.36 (d,  $J = 7.9$  Hz, 2H), 3.47-3.37 (m, 2H), 3.34-3.27 (m, 2H), 3.27-3.21 (m, 0.70H), 3.18-3.13 (m, 1.36H), 3.13-3.07 (m, 1.35H), 3.04-2.99 (m, 0.65H), 2.47-2.43 (m, 3H), 2.42-2.37 (m, 1.28H), 2.14-2.08 (m, 0.63H).

$^{13}\text{C NMR}$  (151 MHz,  $\text{CDCl}_3$ )  $\delta$  143.94, 133.16, 132.46, 129.82, 127.71, 127.48, 52.77, 50.58, 50.25, 49.54, 41.13, 39.75, 21.59, 21.56.

The compound characterization was reported in literature.<sup>6</sup>

### dibenzyl (*E*)-2-azido-2-(4-azidobut-2-en-1-yl)malonate

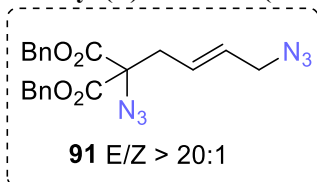

Prepared according to General Procedure A and obtained as colorless oil in single isomer. **Yield** 60%, 25.2 mg. E/Z > 20:1.

$^1\text{H NMR}$  (600 MHz,  $\text{CDCl}_3$ )  $\delta$  7.48 – 7.27 (m, 10H), 5.70 – 5.43 (m, 2H), 5.35 – 5.14 (m, 4H), 3.58 (d,  $J = 6.5$  Hz, 2H), 2.70 (t,  $J = 6.0$  Hz, 2H).

$^{13}\text{C NMR}$  (151 MHz,  $\text{CDCl}_3$ )  $\delta$  166.57, 134.46, 128.81, 128.71, 128.59, 128.56, 127.53, 71.43, 68.48, 52.25, 36.89.

The compound characterization was reported in literature.<sup>6</sup>

### 1,2-diazido-3,3-dimethylbutane

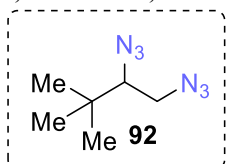

Prepared according to General Procedure A and obtained as colorless oil. **Yield** 64%, 6.7 mg.

$^1\text{H NMR}$  (600 MHz,  $\text{CDCl}_3$ )  $\delta$  3.51 (dd,  $J = 12.2, 2.2$  Hz, 1H), 3.26 (dd,  $J = 12.2, 10.2$  Hz, 1H), 3.21 (dd,  $J = 10.2, 2.2$  Hz, 1H), 0.96 (s, 9H).

$^{13}\text{C NMR}$  (151 MHz,  $\text{CDCl}_3$ )  $\delta$  72.75, 52.45, 34.99, 26.43.

The compound characterization was reported in literature.<sup>6</sup>

### *N*-(2,3-diazidopropyl)benzamide

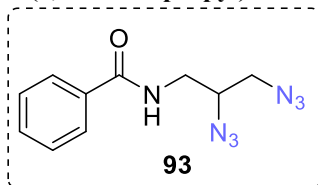

Prepared according to General Procedure A and obtained as colorless oil. **Yield** 58%, 14.2 mg.

**<sup>1</sup>H NMR (600 MHz, CDCl<sub>3</sub>)** δ 7.84 – 7.75 (m, 2H), 7.59 – 7.52 (m, 1H), 7.49 – 7.42 (m, 2H), 6.51 (t, *J* = 6.1 Hz, 1H), 3.92 (tt, *J* = 7.2, 4.2 Hz, 1H), 3.74 (ddd, *J* = 14.1, 6.4, 4.5 Hz, 1H), 3.59 (dd, *J* = 12.9, 4.0 Hz, 1H), 3.51 – 3.39 (m, 2H).

**<sup>13</sup>C NMR (151 MHz, CDCl<sub>3</sub>)** δ 167.89, 133.65, 132.00, 128.76, 126.96, 61.08, 52.90, 41.38.

HRMS APCI: [M+H]<sup>+</sup> calcd. for C<sub>10</sub>H<sub>12</sub>N<sub>7</sub>O: 246.1098; Found 246.1096

### (4-chloro-3-fluoro-2-methylbutan-2-yl)benzene

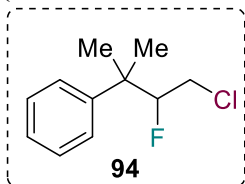

Prepared according to General Procedure C and obtained as colorless oil. **Yield** 47%, 9.4 mg.

**<sup>1</sup>H NMR (600 MHz, CDCl<sub>3</sub>)** δ 7.38 – 7.32 (m, 4H), 7.28 – 7.25 (m, 1H), 4.68 (ddd, *J* = 48.2, 7.5, 3.5 Hz, 1H), 3.40 – 3.30 (m, 2H), 1.44 (d, *J* = 1.7 Hz, 3H), 1.42 (d, *J* = 1.3 Hz, 3H).

**<sup>13</sup>C NMR (151 MHz, CDCl<sub>3</sub>)** δ 143.91 (d, *J* = 3.4 Hz), 128.61, 126.92, 126.27, 100.45, 99.83 (d, *J* = 185.1 Hz), 43.94 (d, *J* = 23.7 Hz), 41.85 (d, *J* = 18.7 Hz), 26.20 (d, *J* = 4.3 Hz), 22.49 (d, *J* = 4.7 Hz).

**<sup>19</sup>F NMR (565 MHz, CDCl<sub>3</sub>)** δ -189.10 – -189.62 (m).

GC-MS: [M]<sup>+</sup> calcd. for C<sub>11</sub>H<sub>14</sub>ClF: 200.0768; Found 200

### *N*-(3-chloro-2-fluoropropyl)benzamide

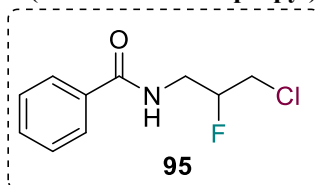

Prepared according to General Procedure C and obtained as colorless oil. **Yield** 54%,

11.6 mg.

**<sup>1</sup>H NMR (600 MHz, CDCl<sub>3</sub>)** δ 7.84 – 7.74 (m, 2H), 7.58 – 7.50 (m, 1H), 7.49-7.41 (m, 2H), 6.47 (s, 1H), 4.98 – 4.85 (m, 1H), 4.03-3.87 (m, 1H), 3.82 – 3.65 (m, 3H).

**<sup>13</sup>C NMR (151 MHz, CDCl<sub>3</sub>)** δ 167.82, 133.72, 131.97, 128.74, 126.99, 90.84 (d, *J* = 176.6 Hz), 43.53 (d, *J* = 24.2 Hz), 41.55 (d, *J* = 21.4 Hz).

**<sup>19</sup>F NMR (565 MHz, CDCl<sub>3</sub>)** δ -187.92 – -188.26 (m).

HRMS ESI: [M+H]<sup>+</sup> calcd. for C<sub>21</sub>H<sub>26</sub>Cl<sub>2</sub>FNO: 216.0586; Found 216.0589

### (1-azidoethyl)benzene

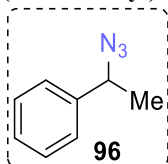

Prepared according to General Procedure A and obtained as colorless oil. **Yield** 25%, 3.6 mg.

**<sup>1</sup>H NMR (600 MHz, CDCl<sub>3</sub>)** δ 7.45 – 7.29 (m, 5H), 4.62 (q, *J* = 6.8 Hz, 1H), 1.54 (d, *J* = 6.8 Hz, 3H).

**<sup>13</sup>C NMR (151 MHz, CDCl<sub>3</sub>)** δ 140.85, 128.78, 128.14, 126.38, 61.10, 21.59.

HRMS APCI:  $[M-N_2+H]^+$  calcd. for  $C_8H_{10}N$ : 120.0808; Found 120.0810

**4,5-diazidopentyl 4-ethylbenzoate**

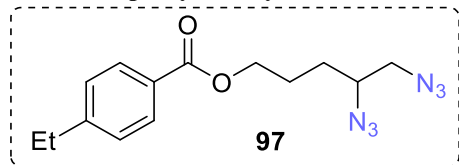

Prepared according to General Procedure A and obtained as colorless oil.

**Yield** 68%, 20.5 mg.

**$^1H$  NMR (600 MHz,  $CDCl_3$ )**  $\delta$  7.99 – 7.90 (m, 2H), 7.30 – 7.24 (m, 2H), 4.41 – 4.29 (m, 2H), 3.55 (ddt,  $J = 8.8, 7.3, 4.4$  Hz, 1H), 3.45 (dd,  $J = 12.7, 4.2$  Hz, 1H), 3.38 (dd,  $J = 12.7, 7.3$  Hz, 1H), 2.71 (q,  $J = 7.6$  Hz, 2H), 2.01 – 1.92 (m, 1H), 1.92 – 1.83 (m, 1H), 1.78 – 1.62 (m, 2H), 1.26 (t,  $J = 7.6$  Hz, 4H).

**$^{13}C$  NMR (151 MHz,  $CDCl_3$ )**  $\delta$  166.60, 149.98, 129.69, 127.96, 127.49, 63.91, 61.61, 54.85, 28.96, 28.53, 25.32, 15.26.

The compound characterization was reported in literature.<sup>6</sup>

## VIII. NMR Spectrum for New Compounds



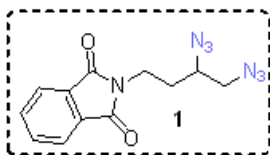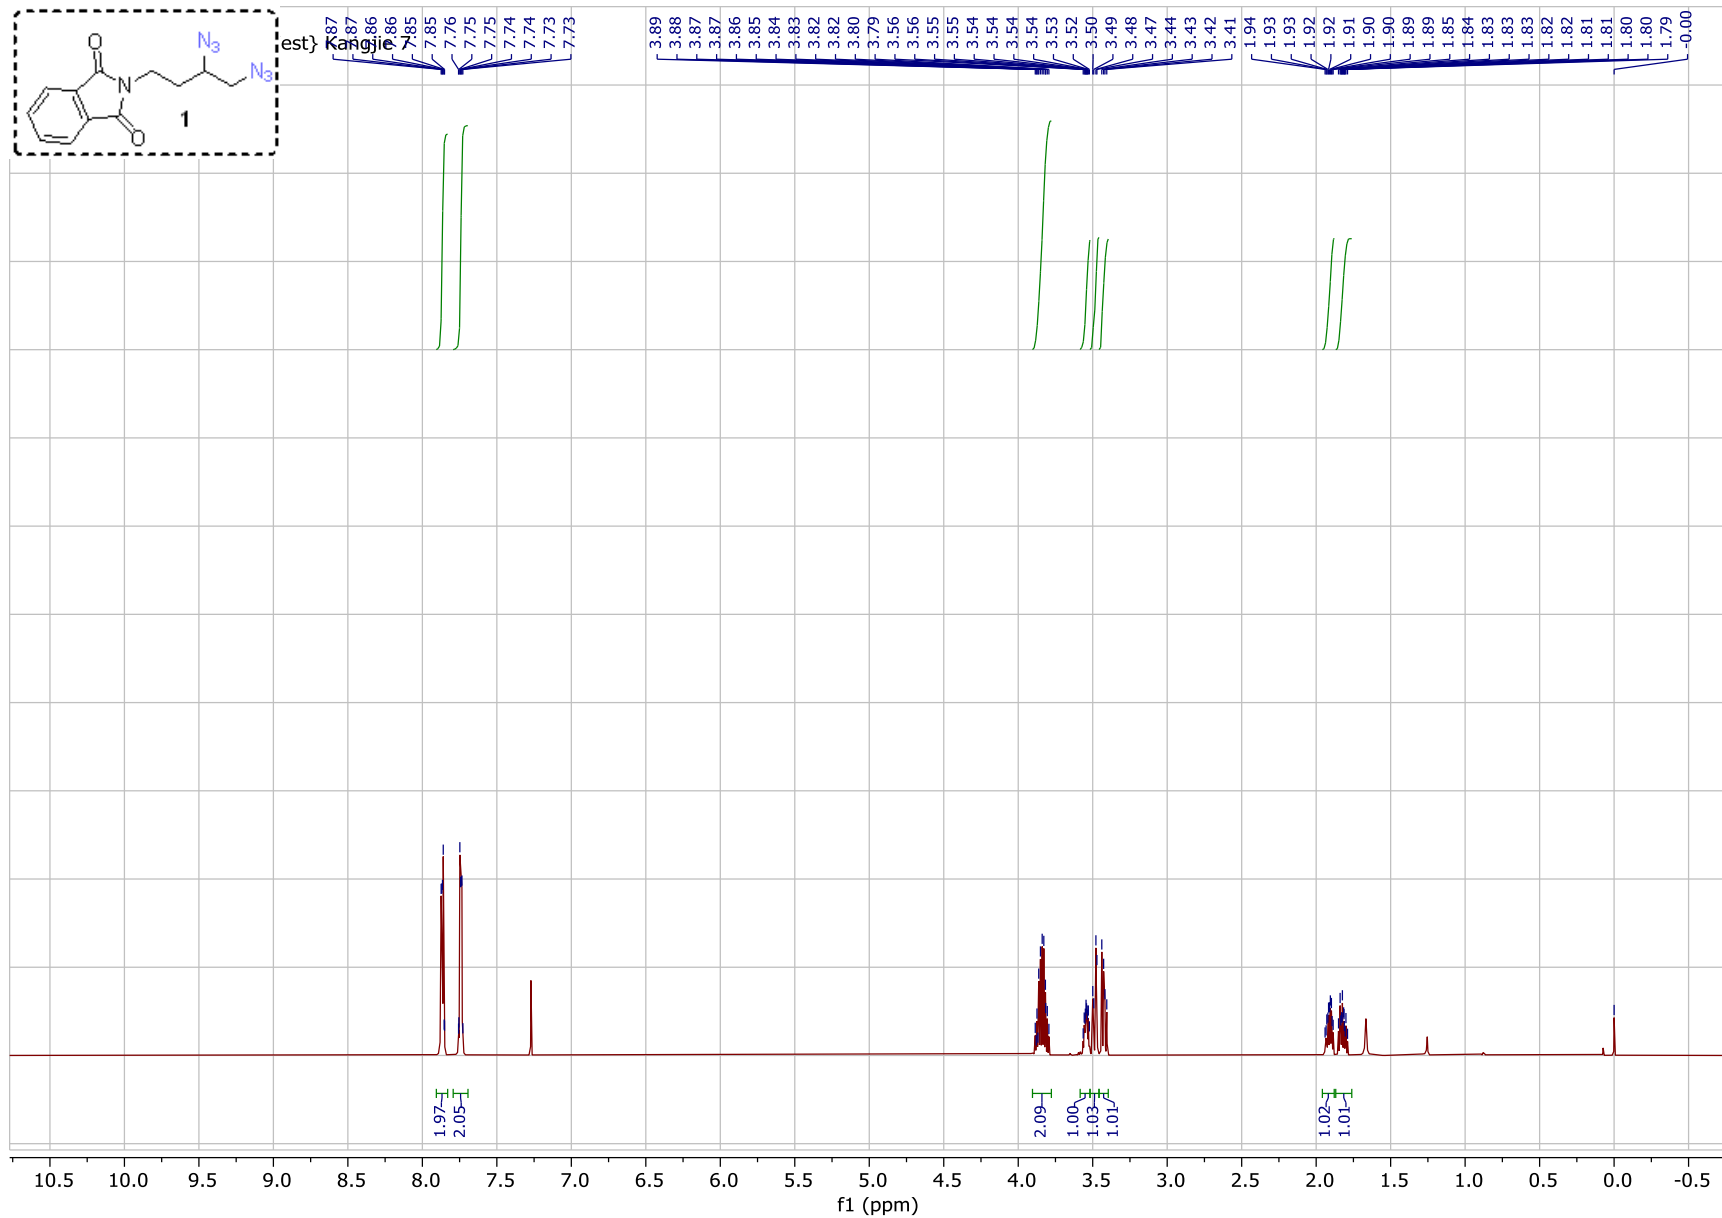



est) Kangji 7

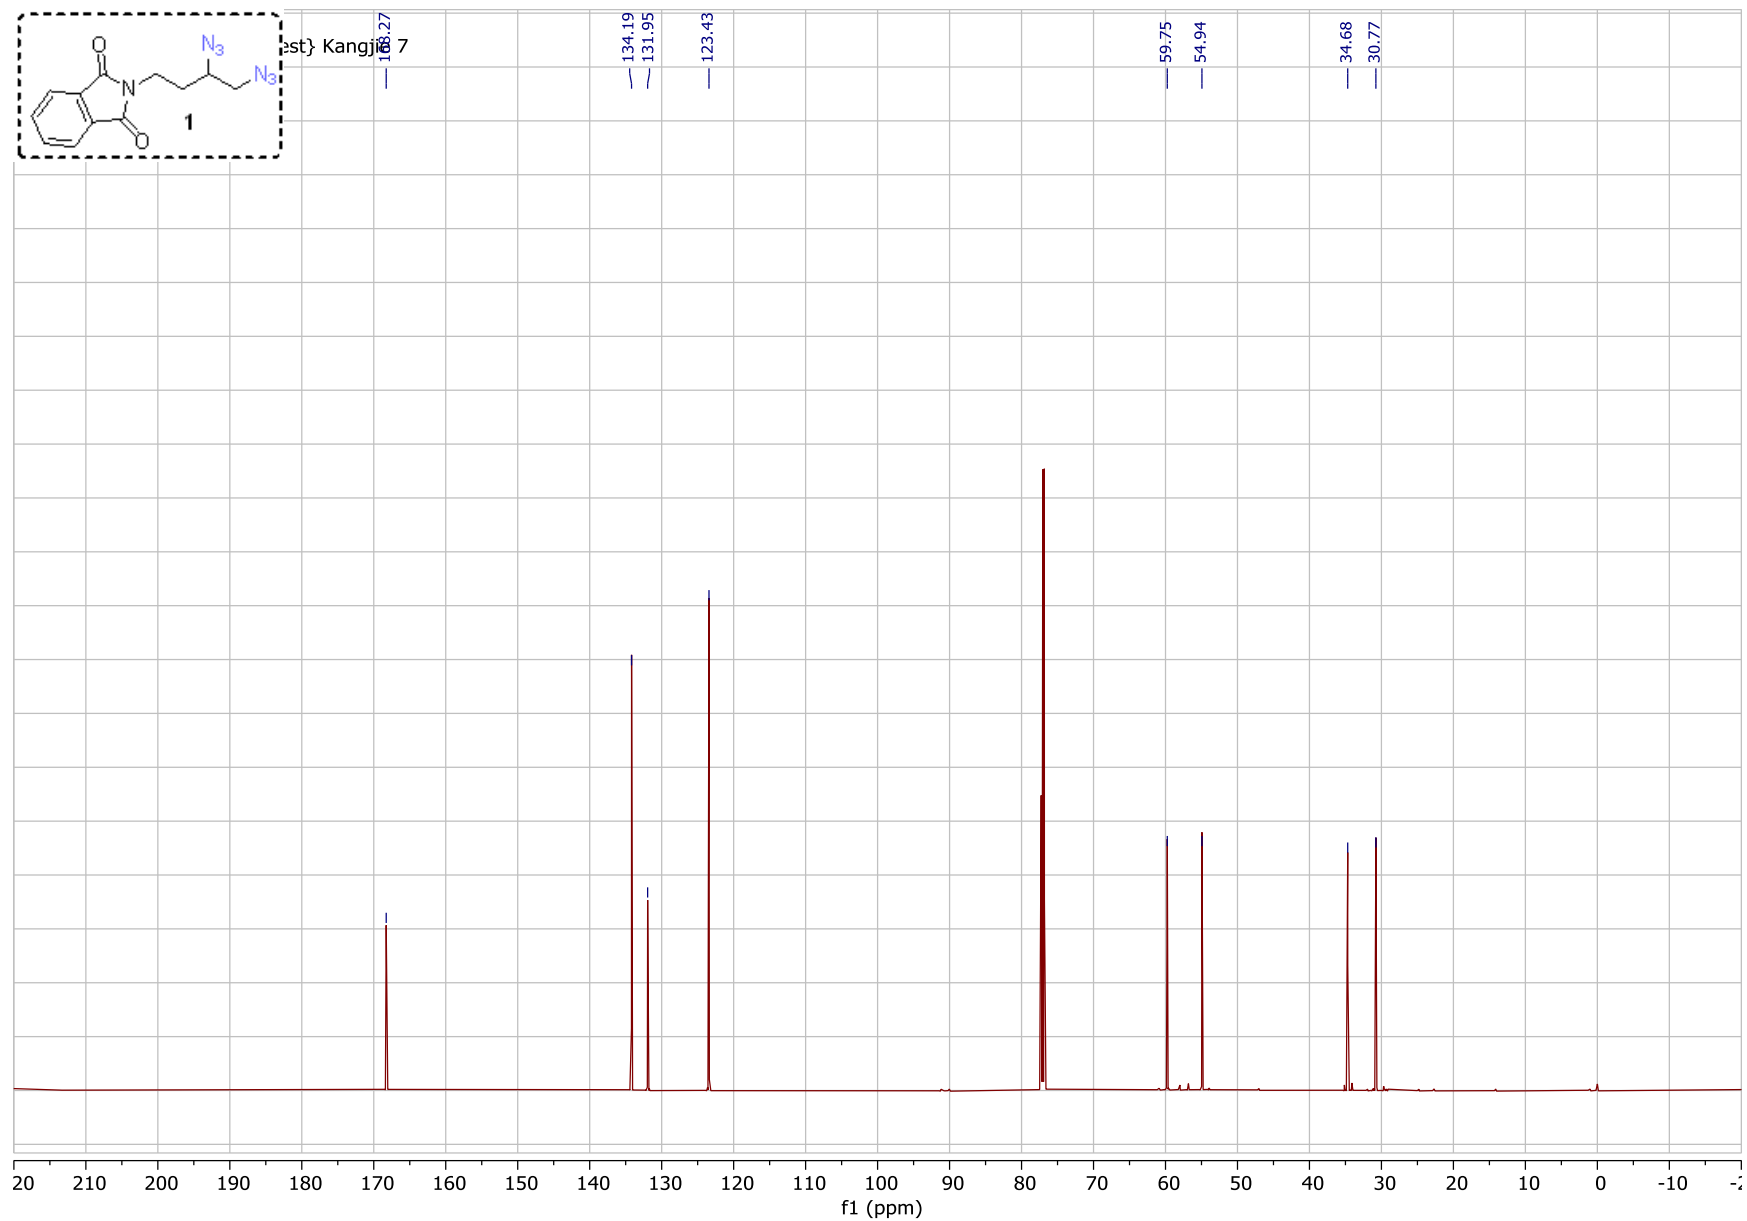

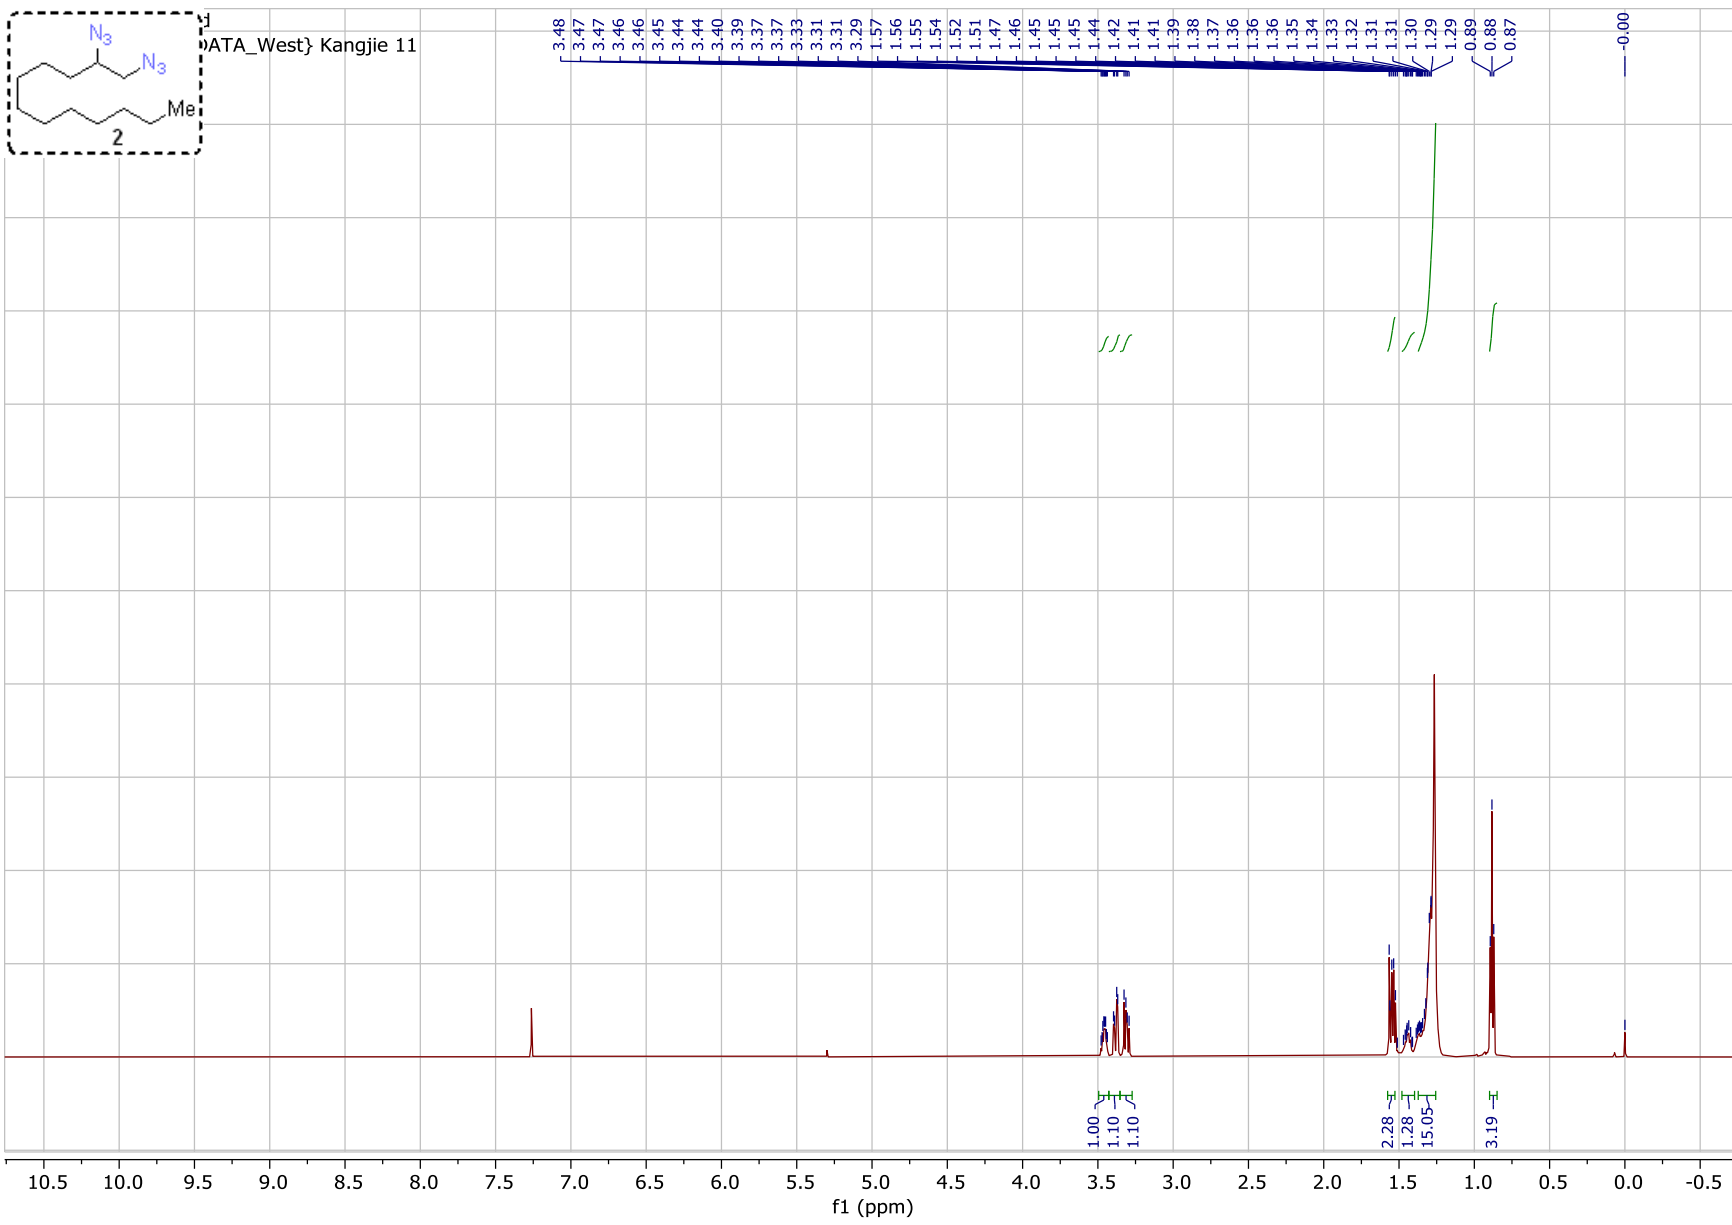

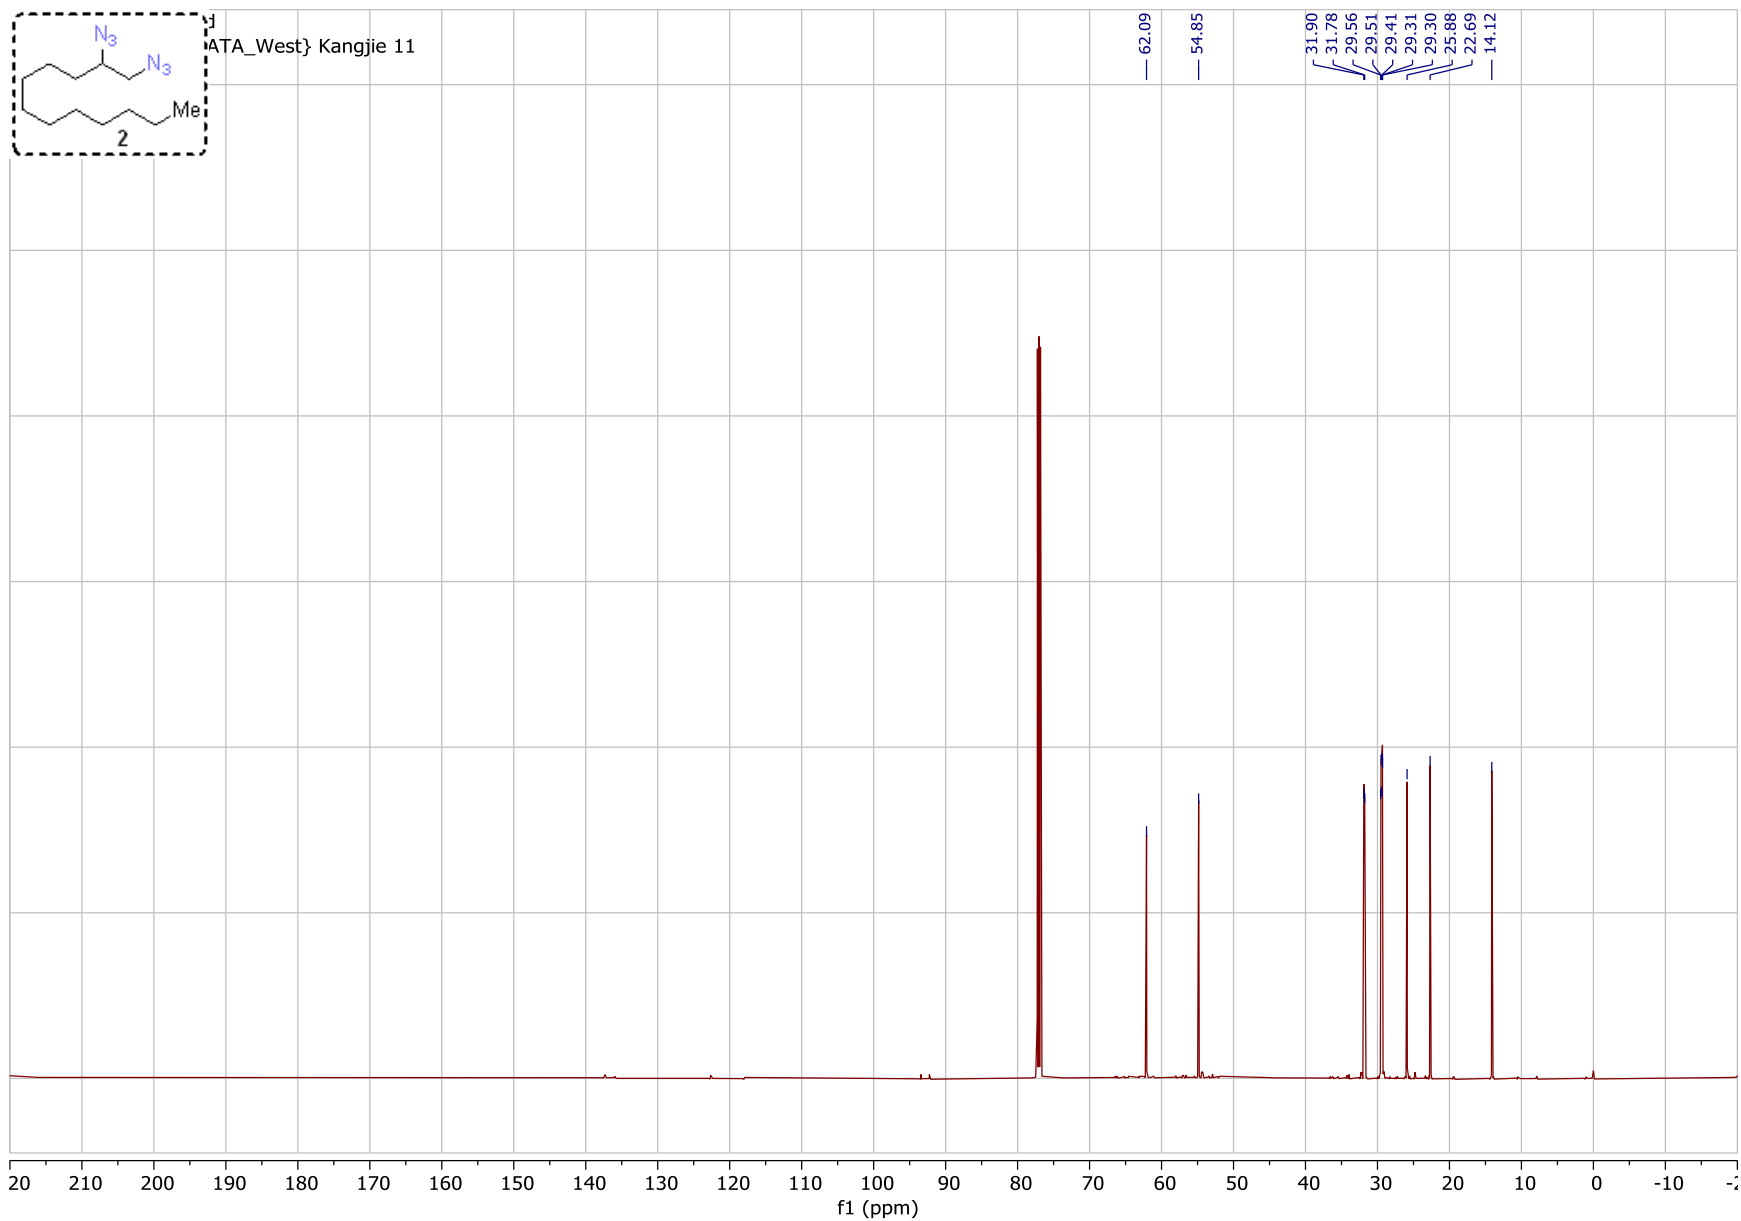

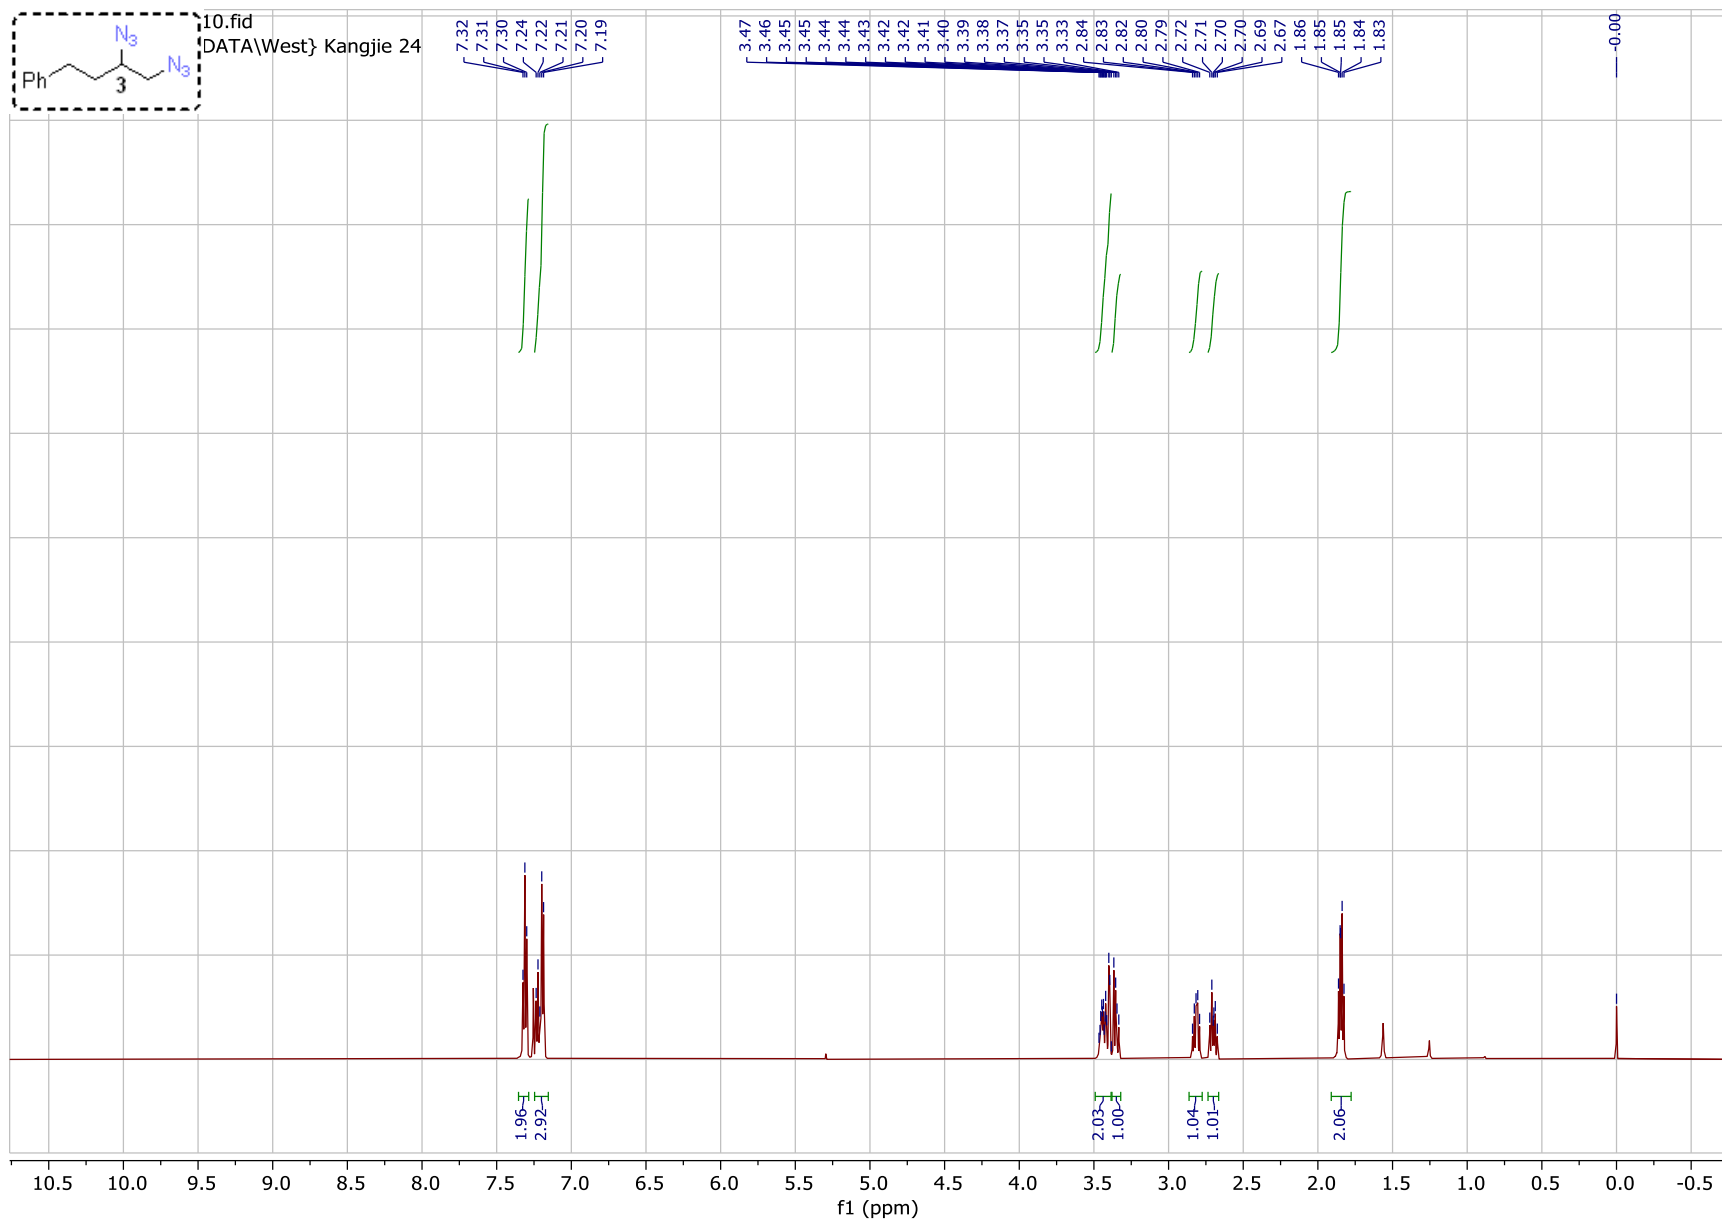

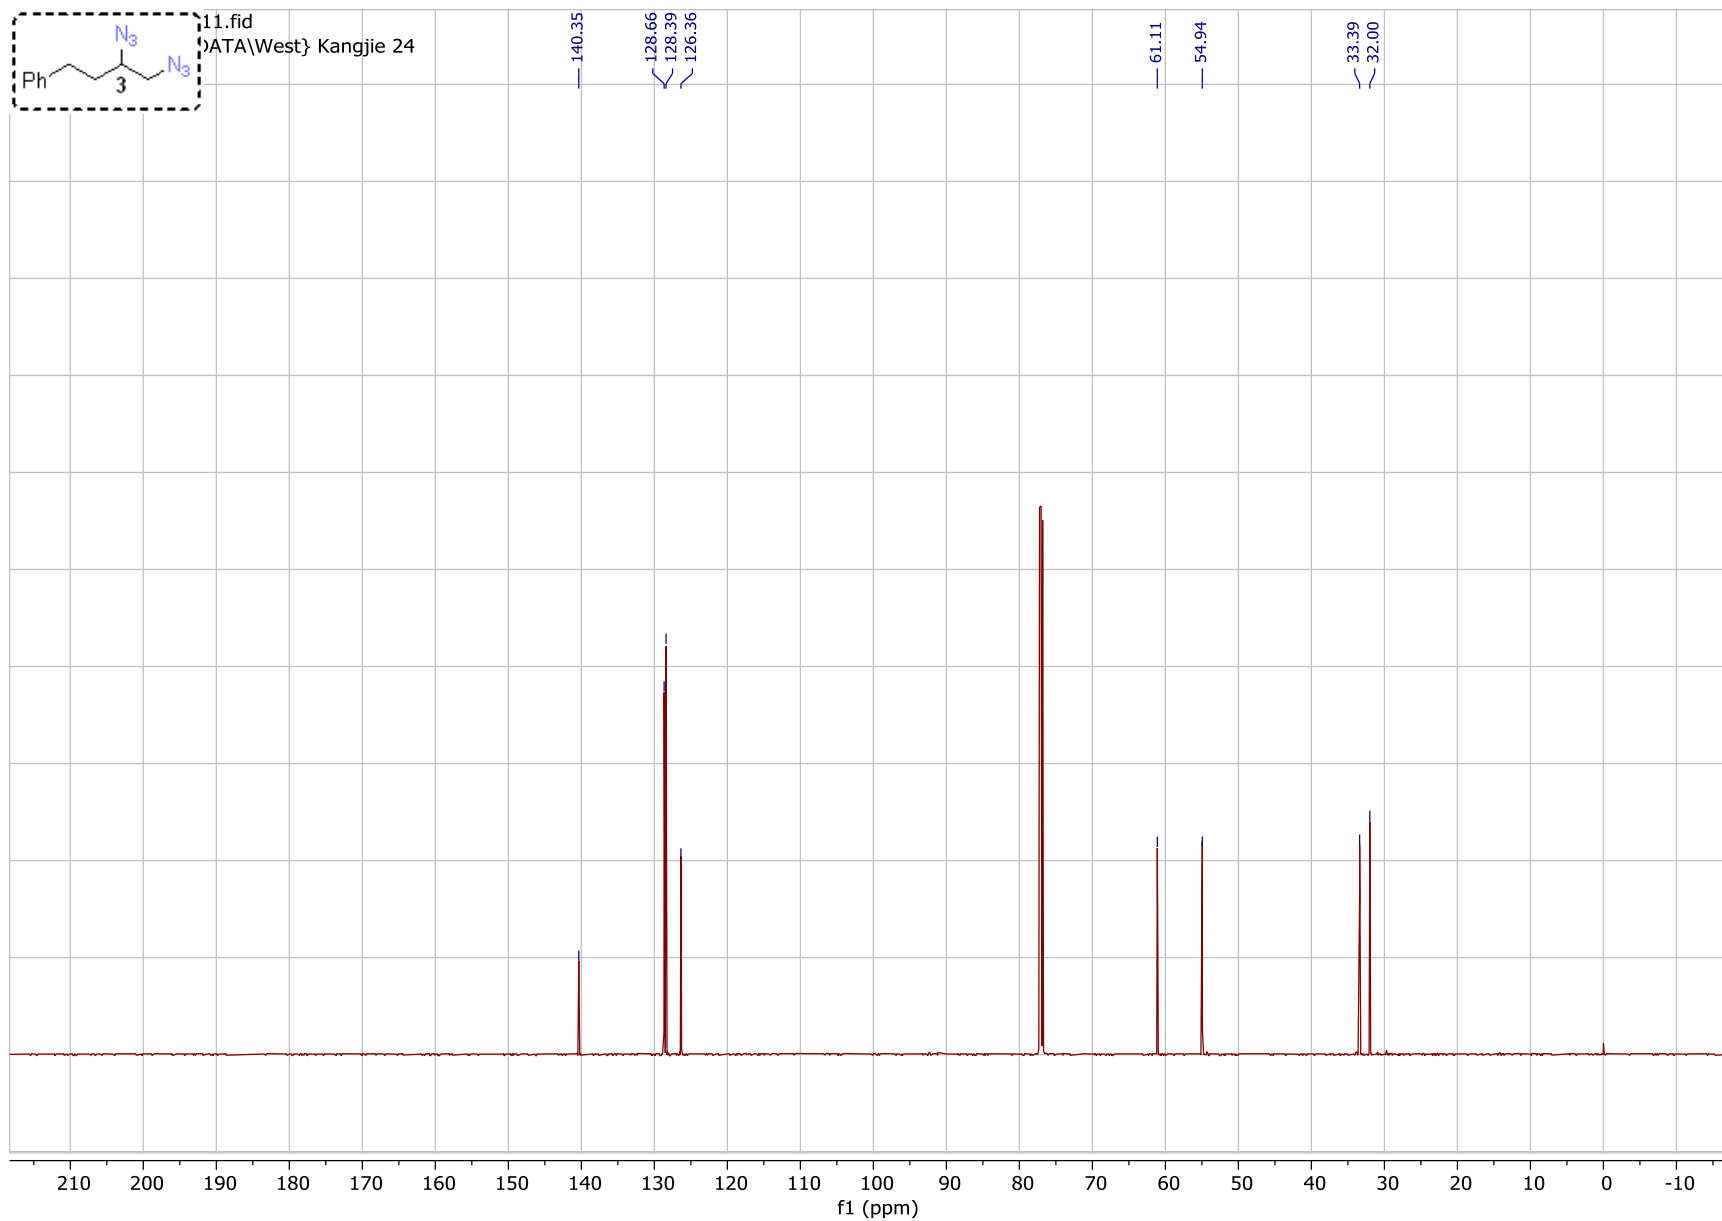

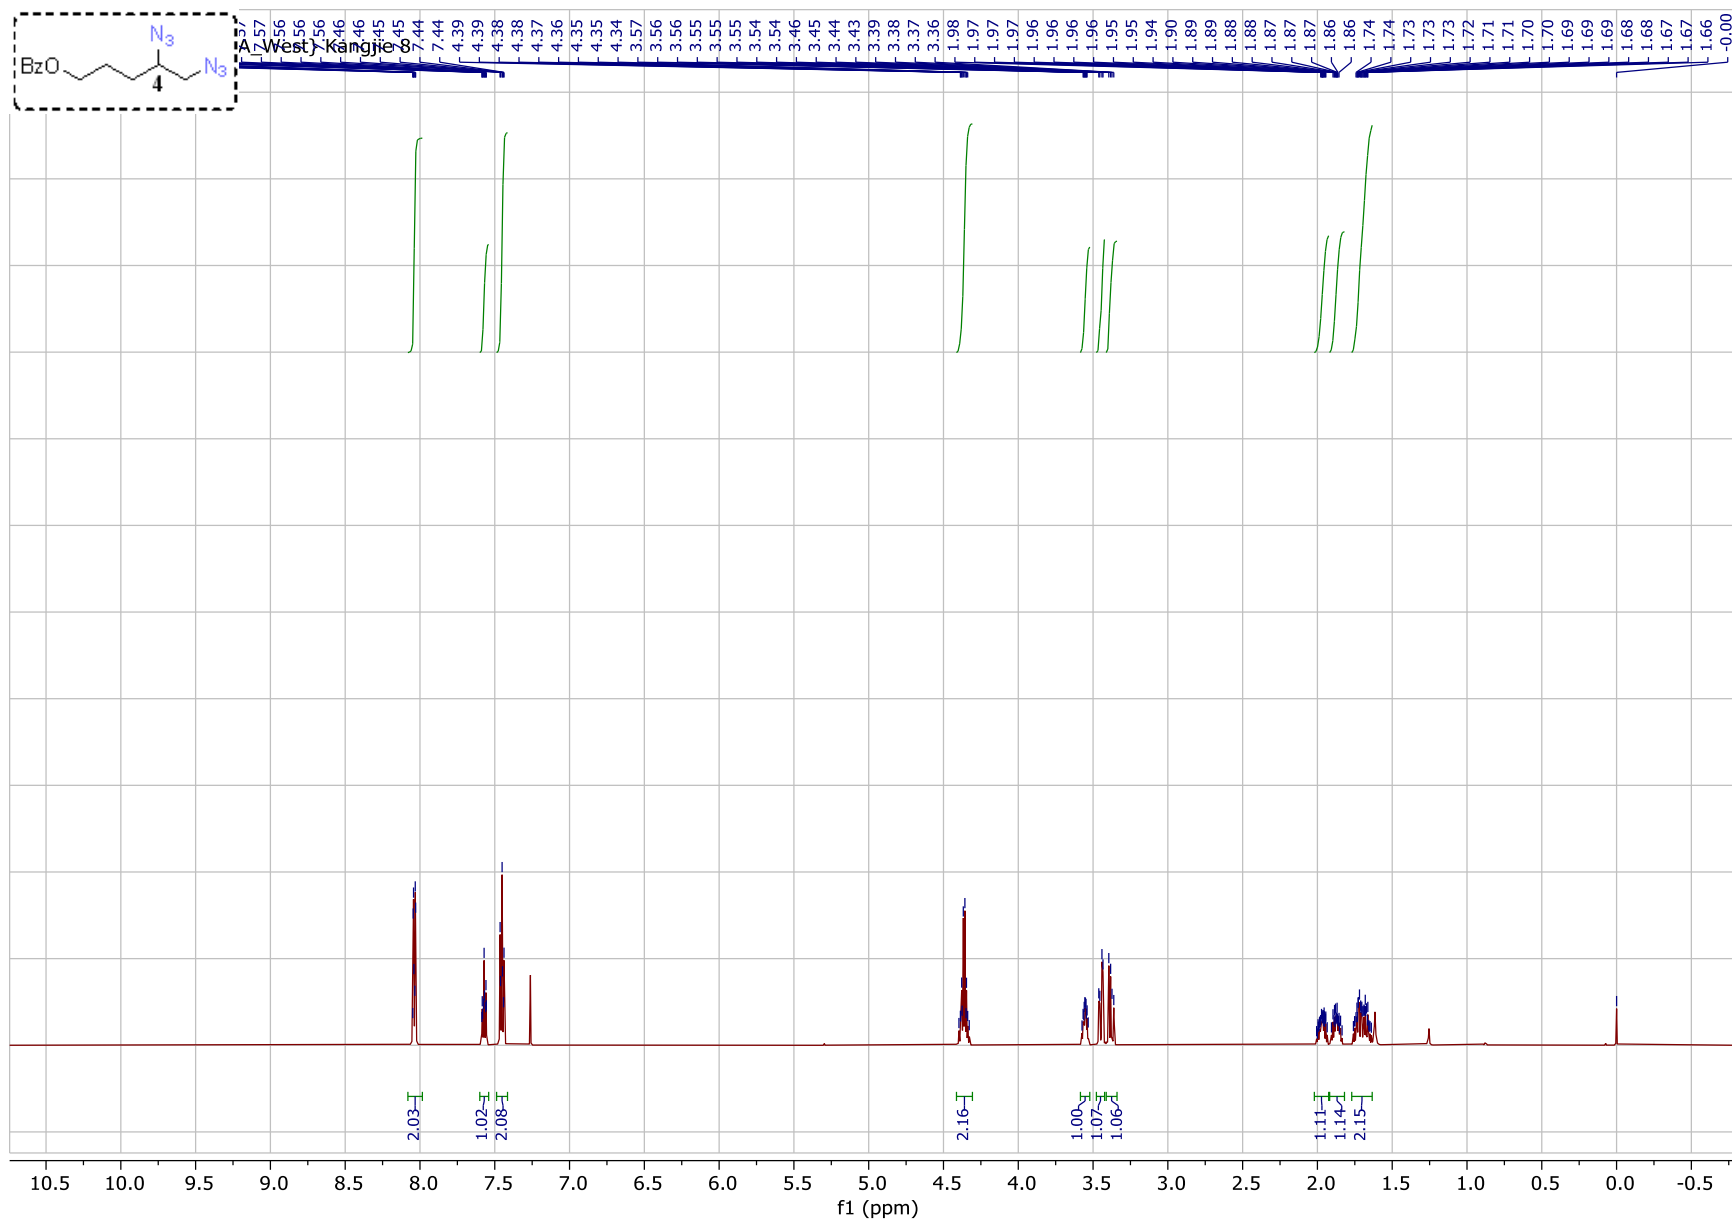

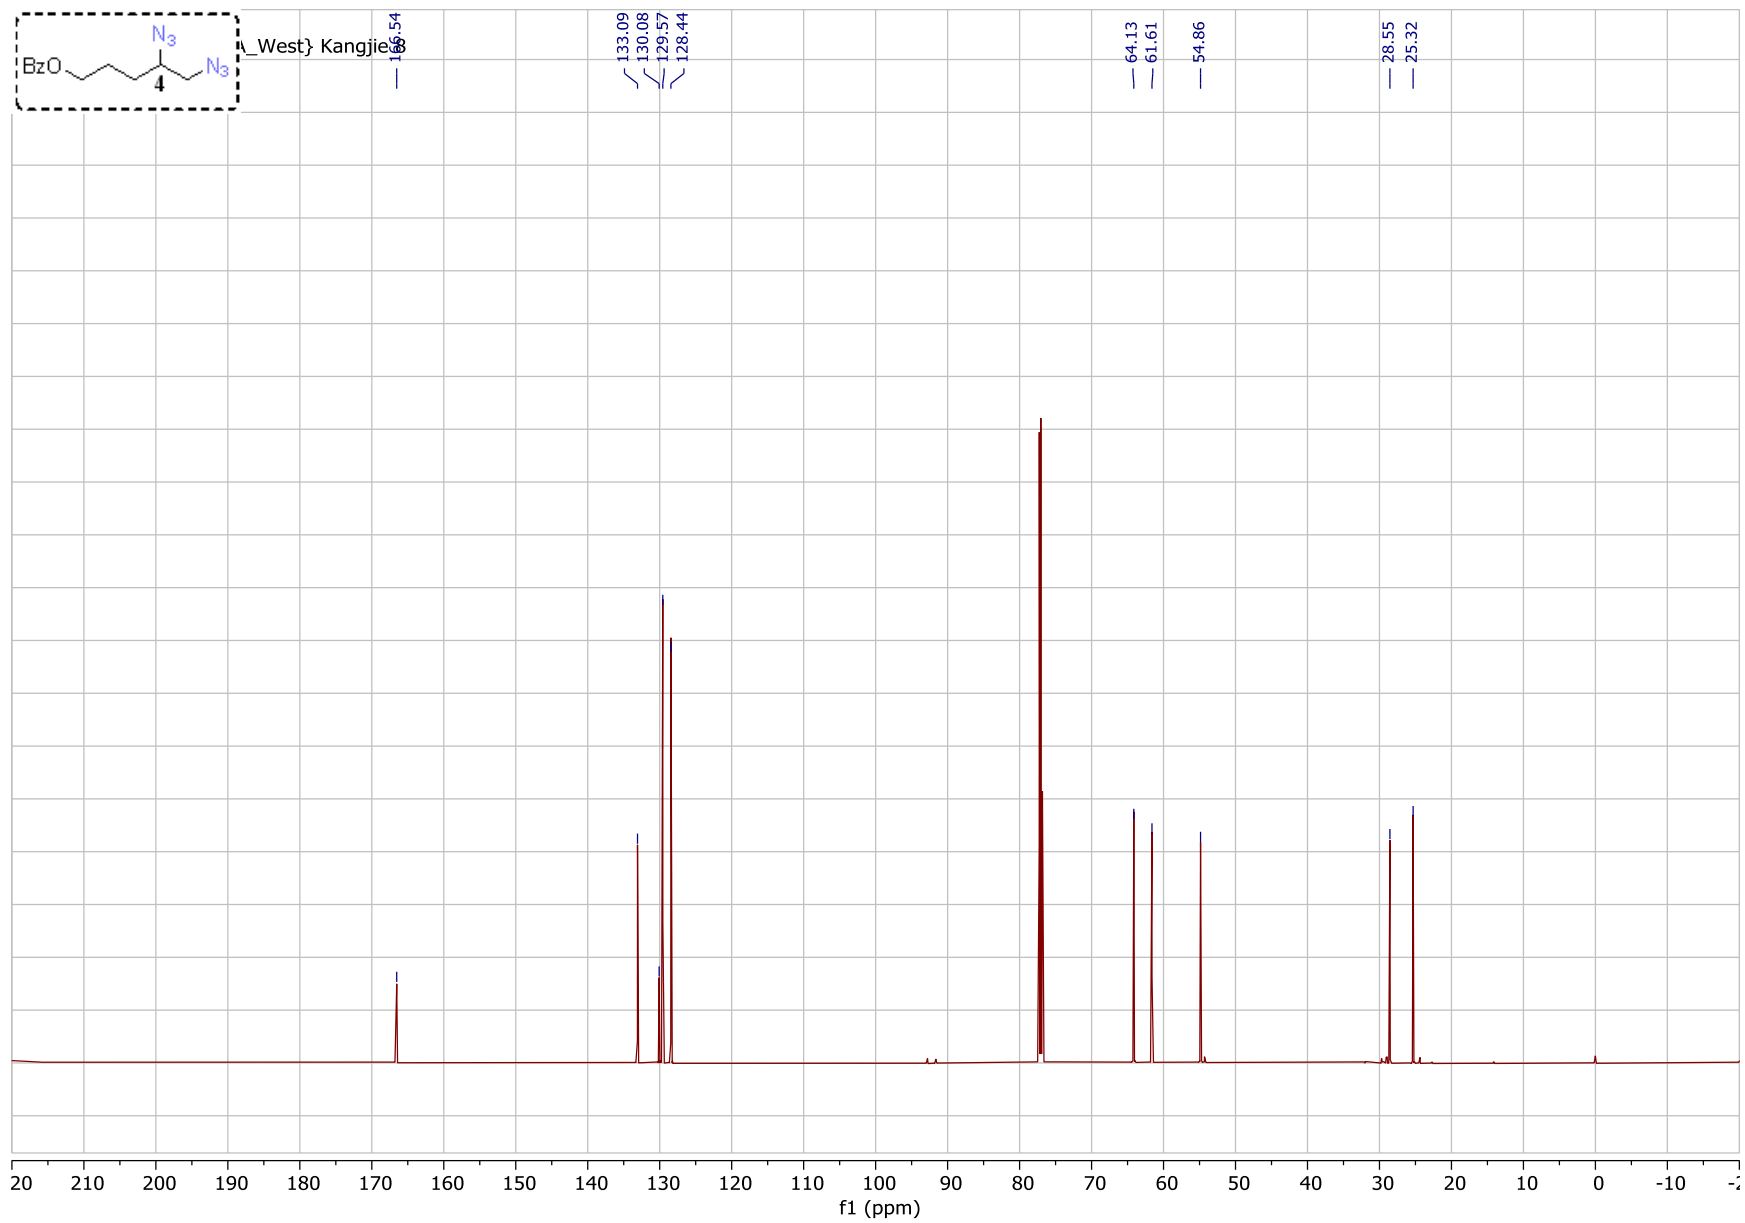



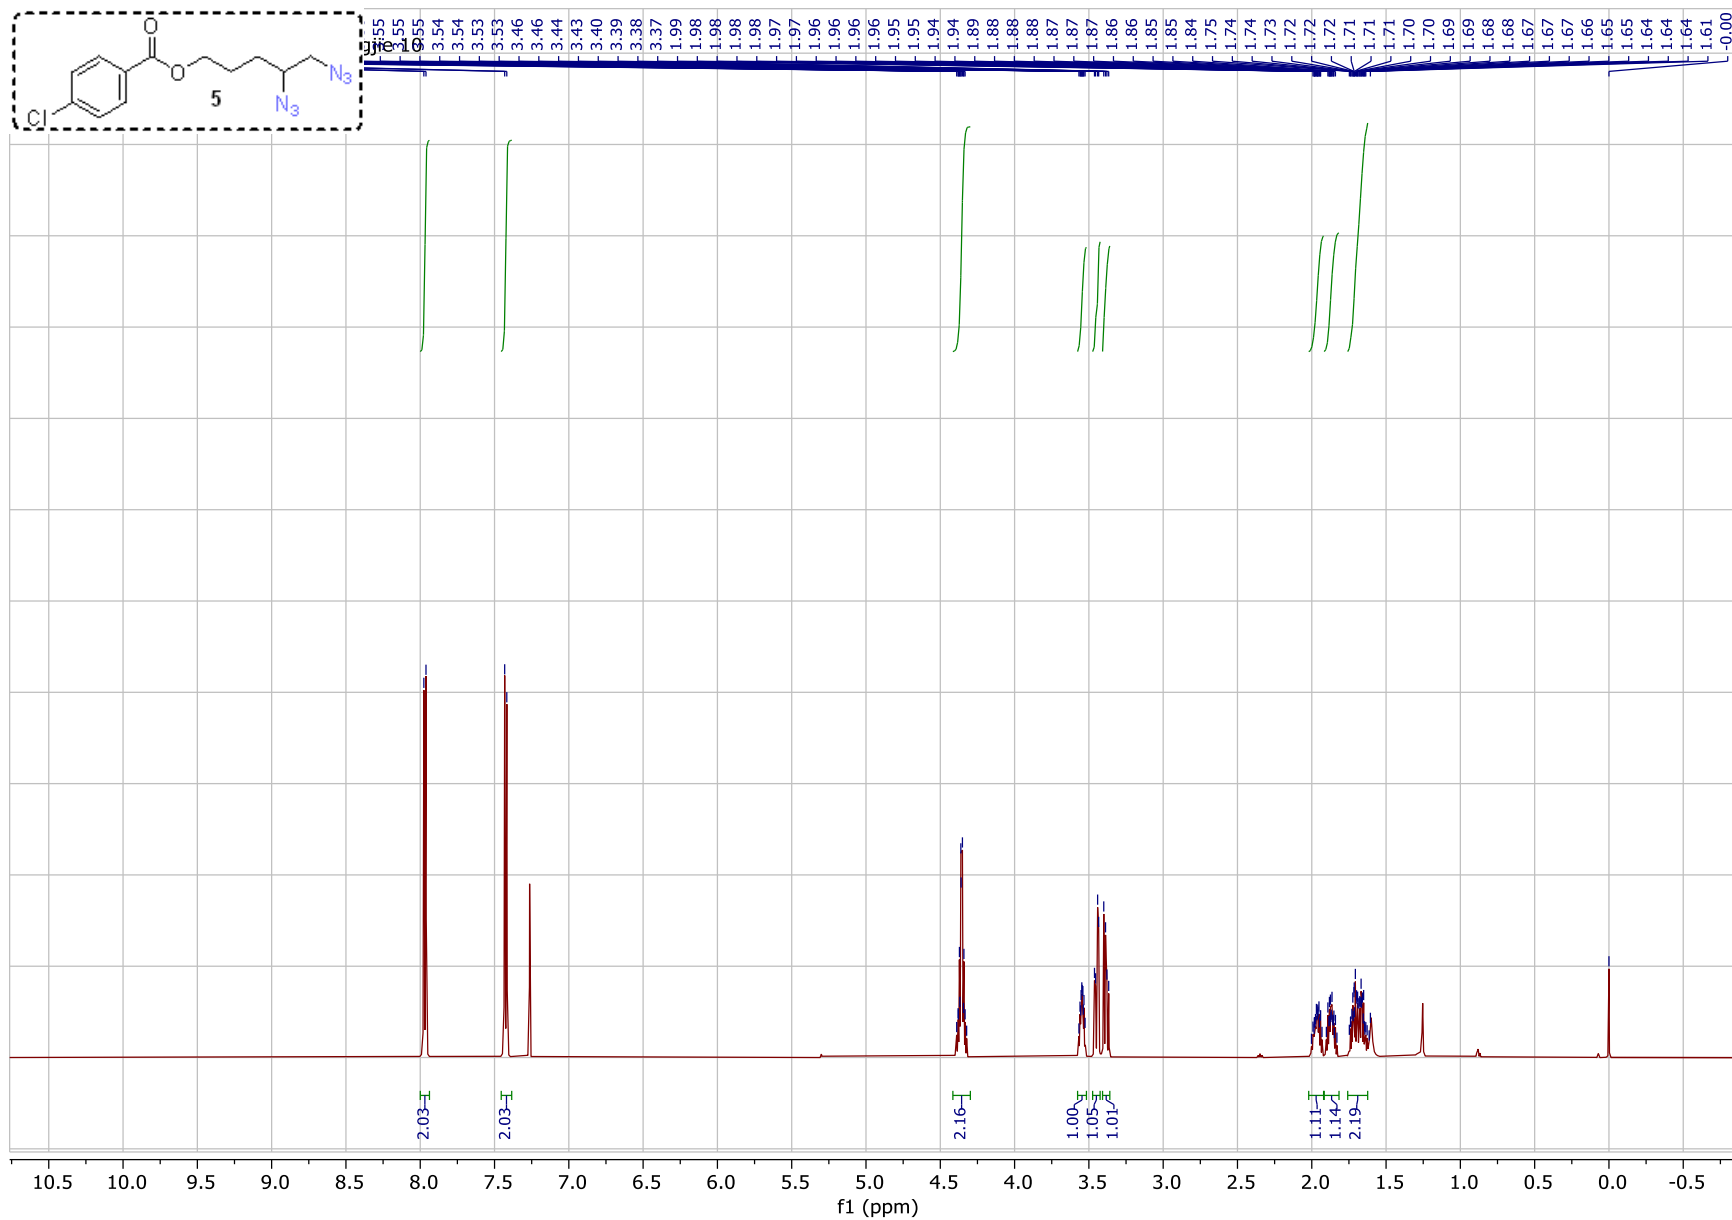

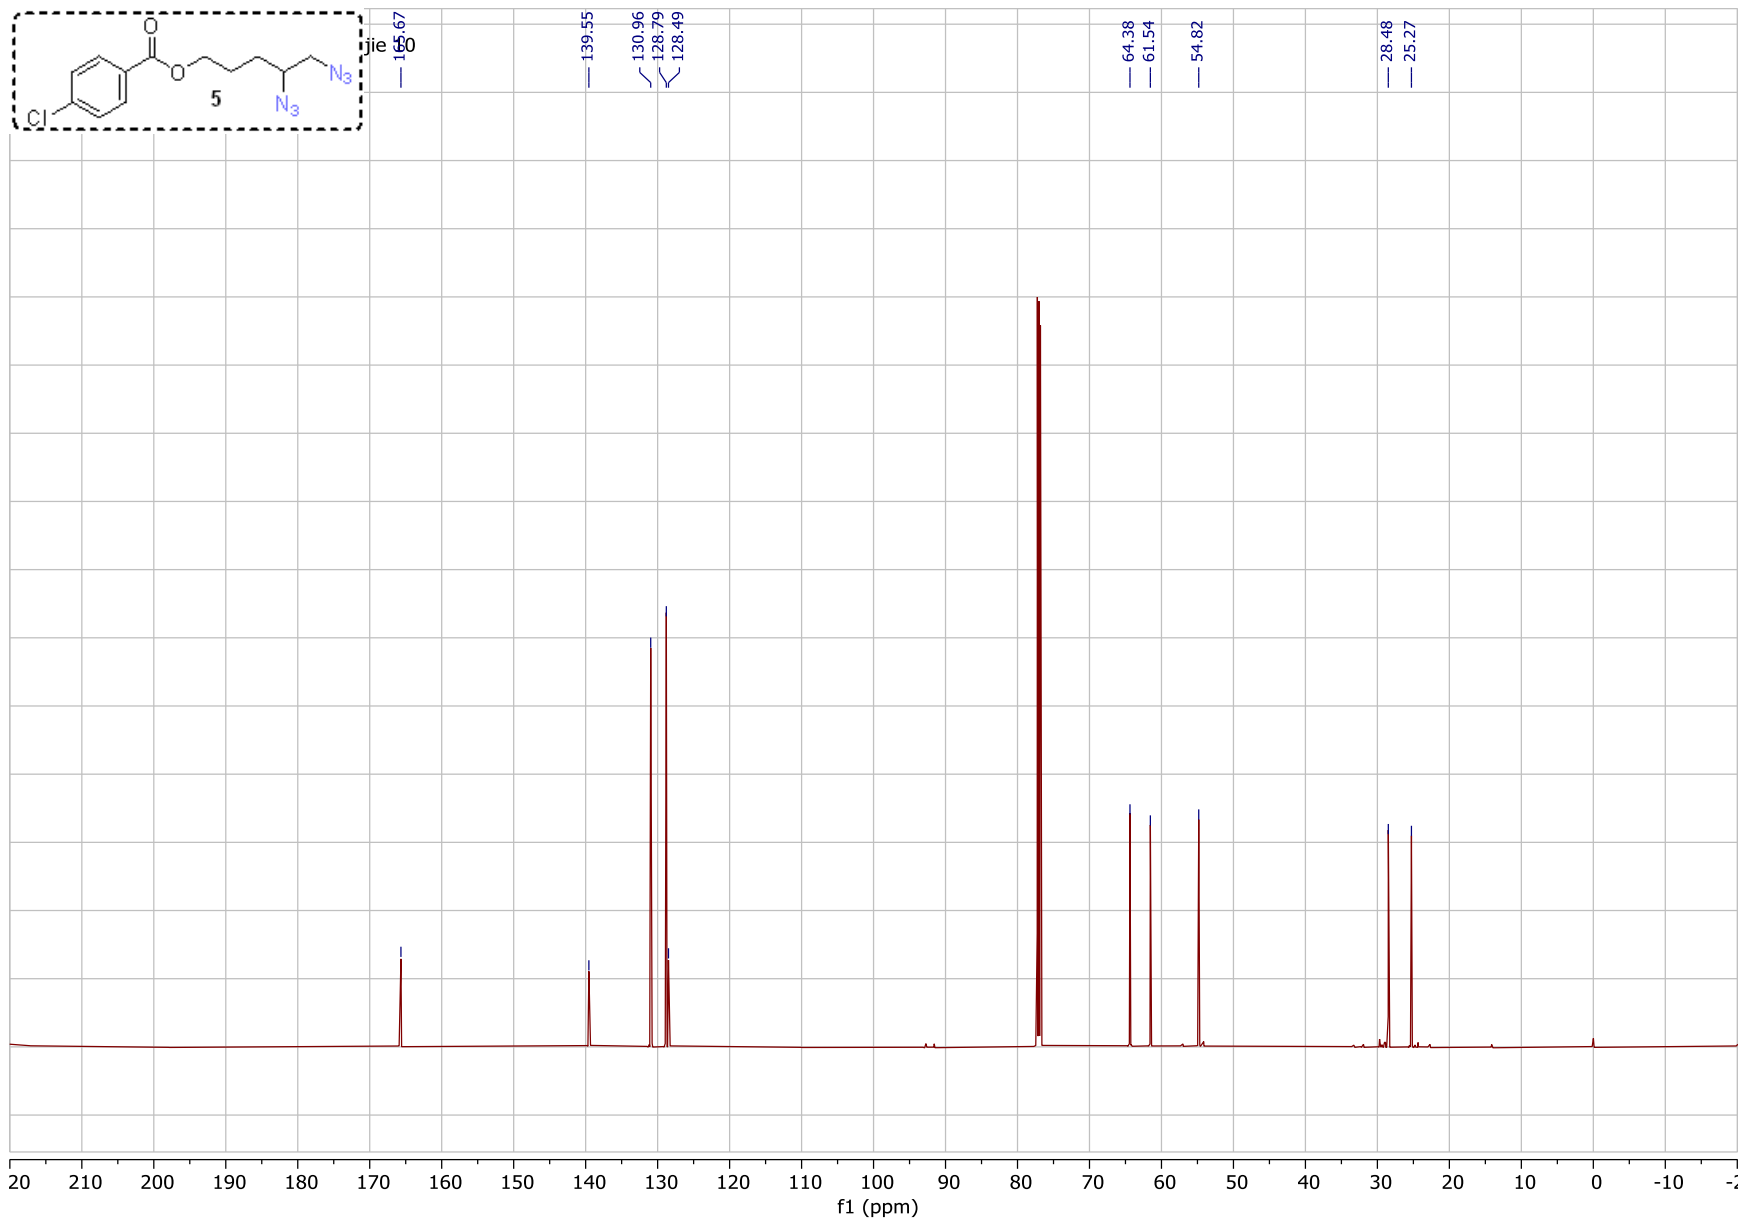

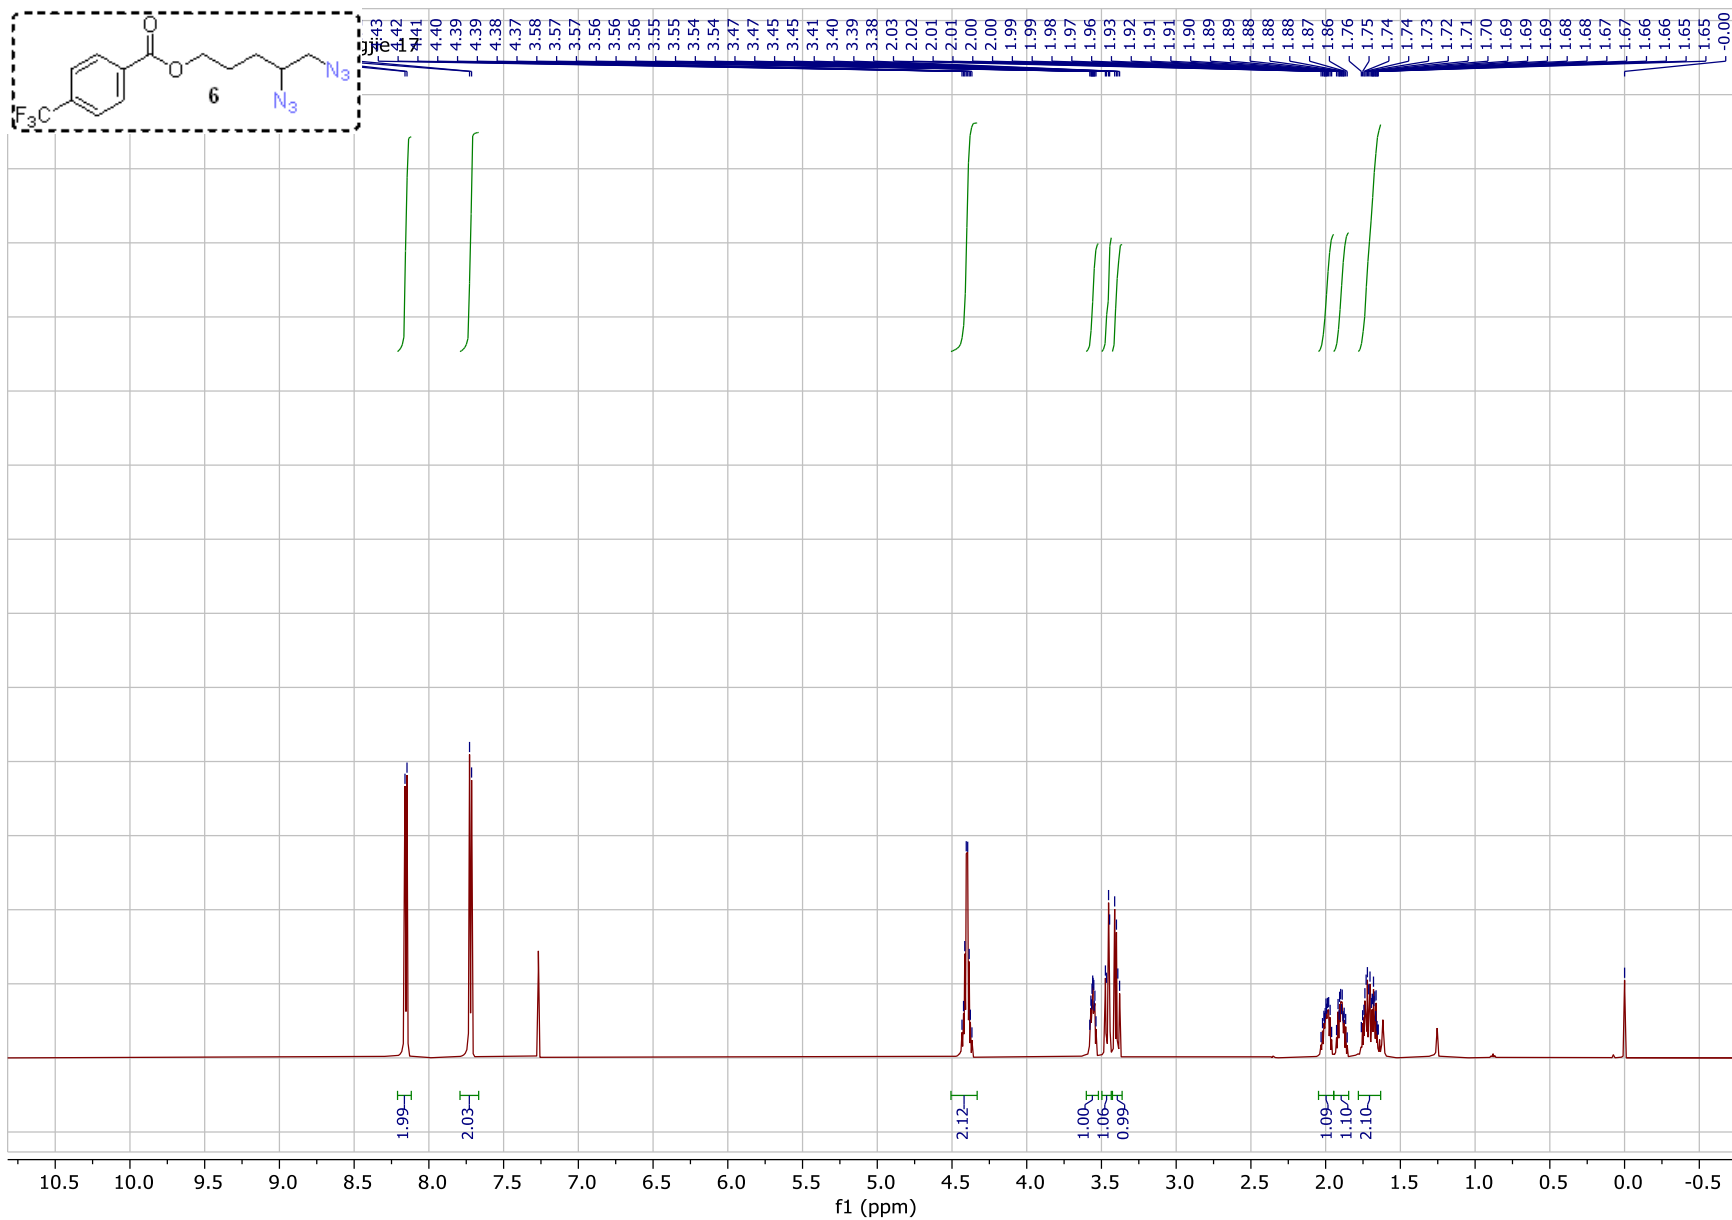

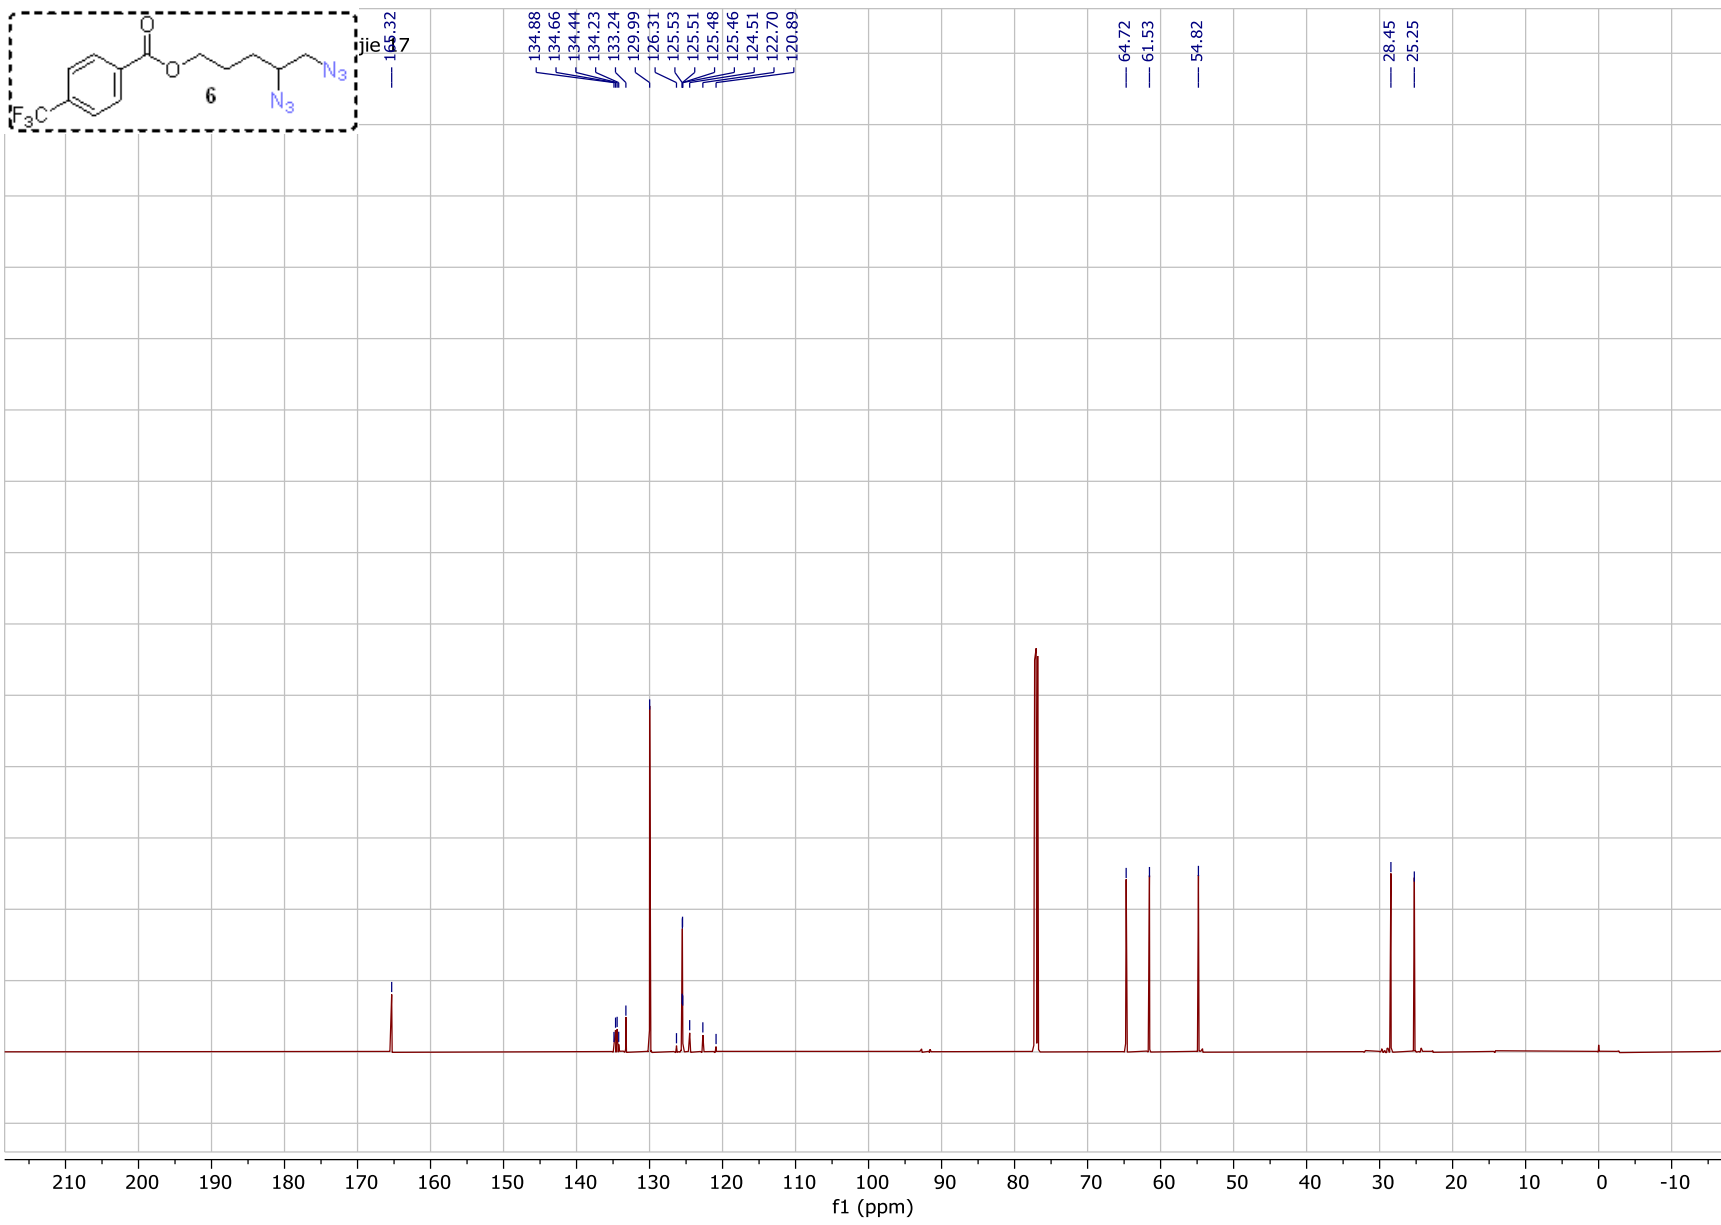

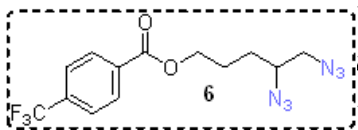

West Kangjie 17

-63.10

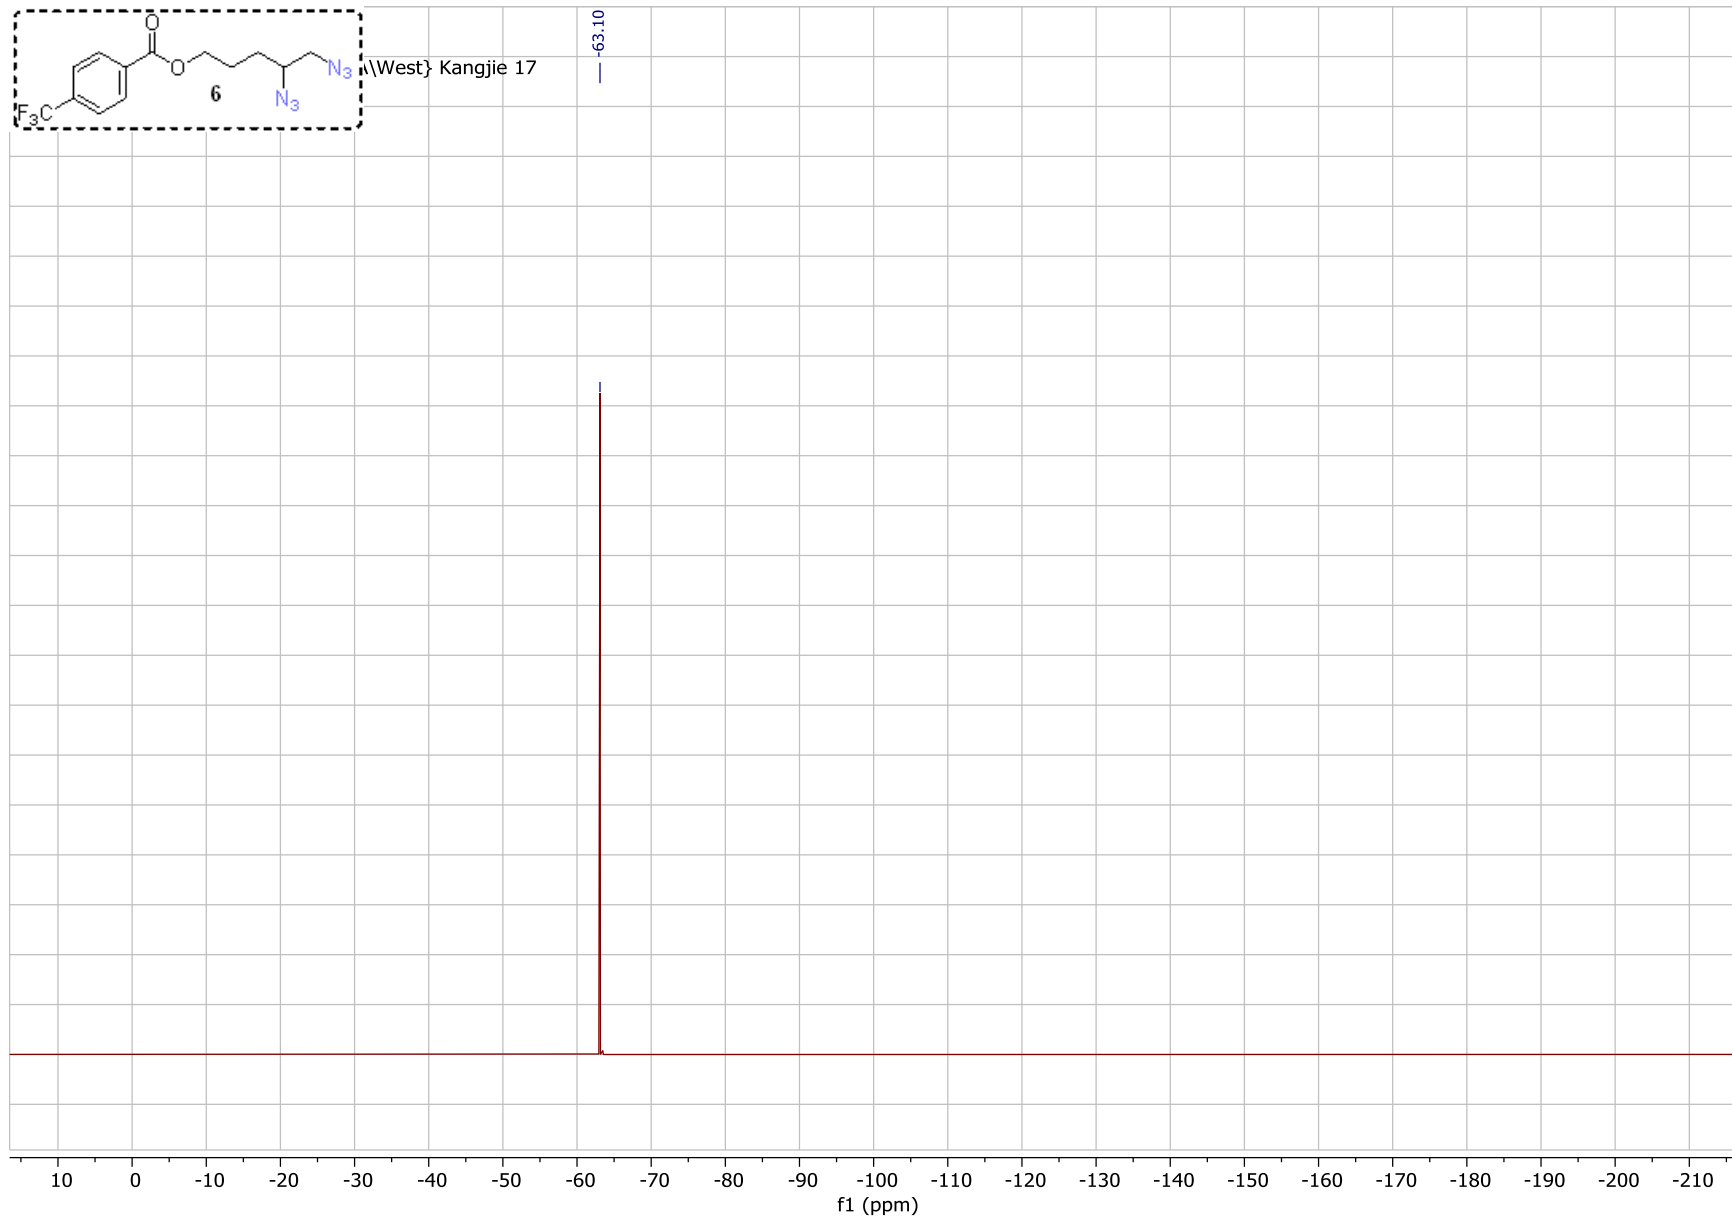

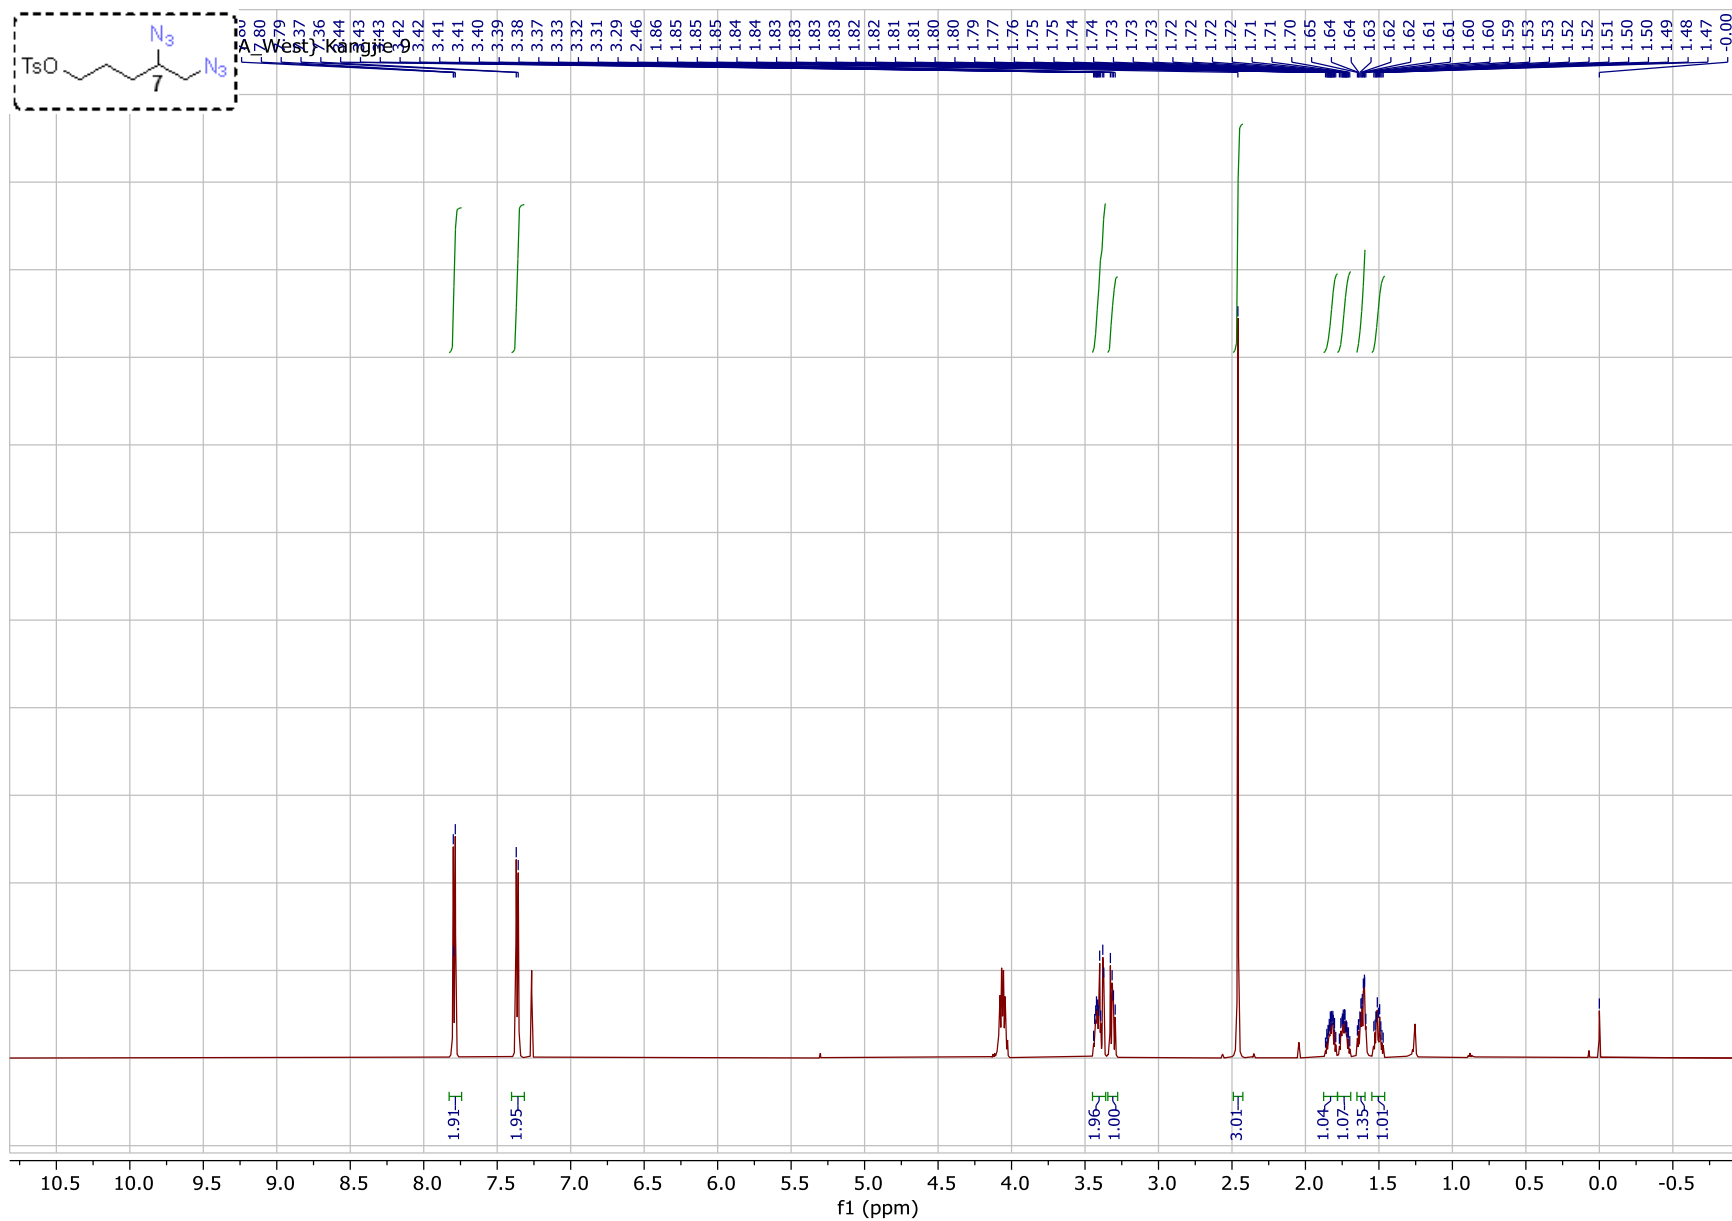

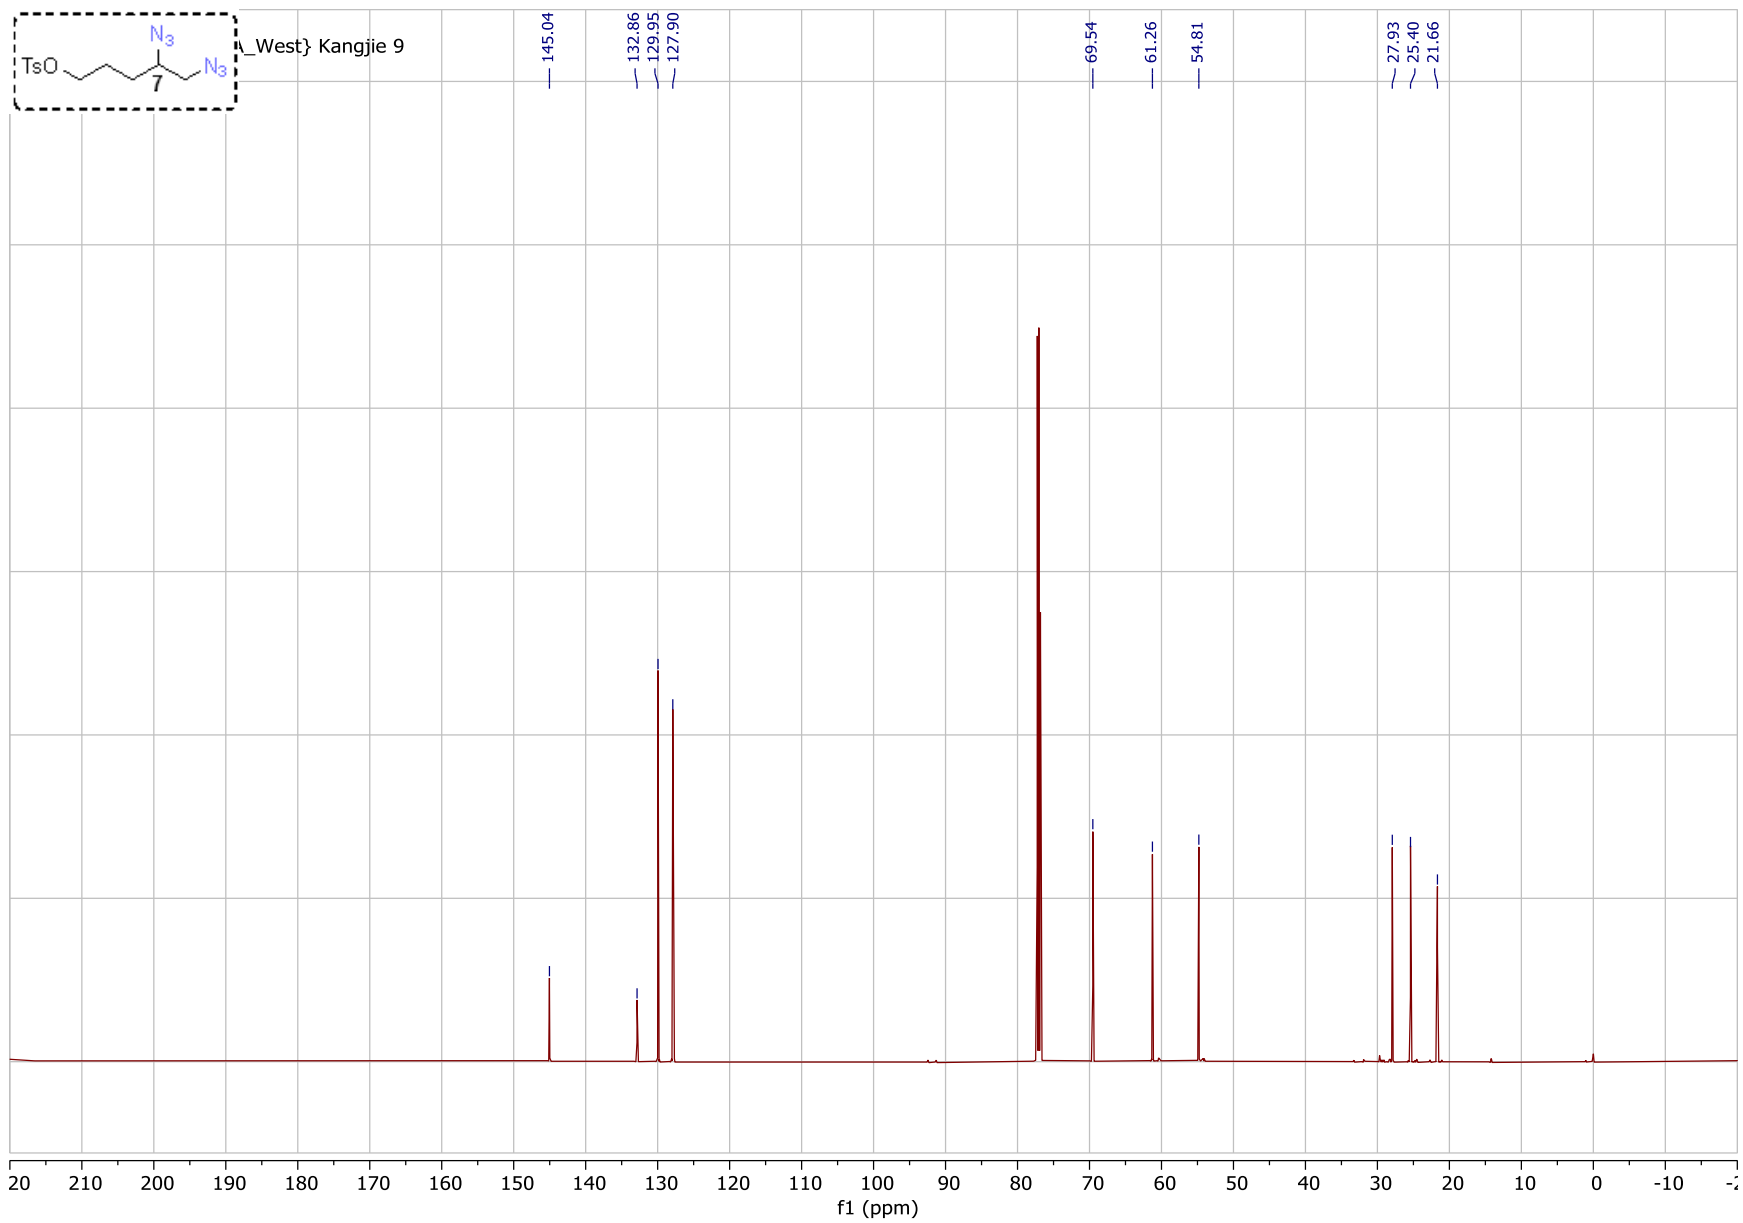

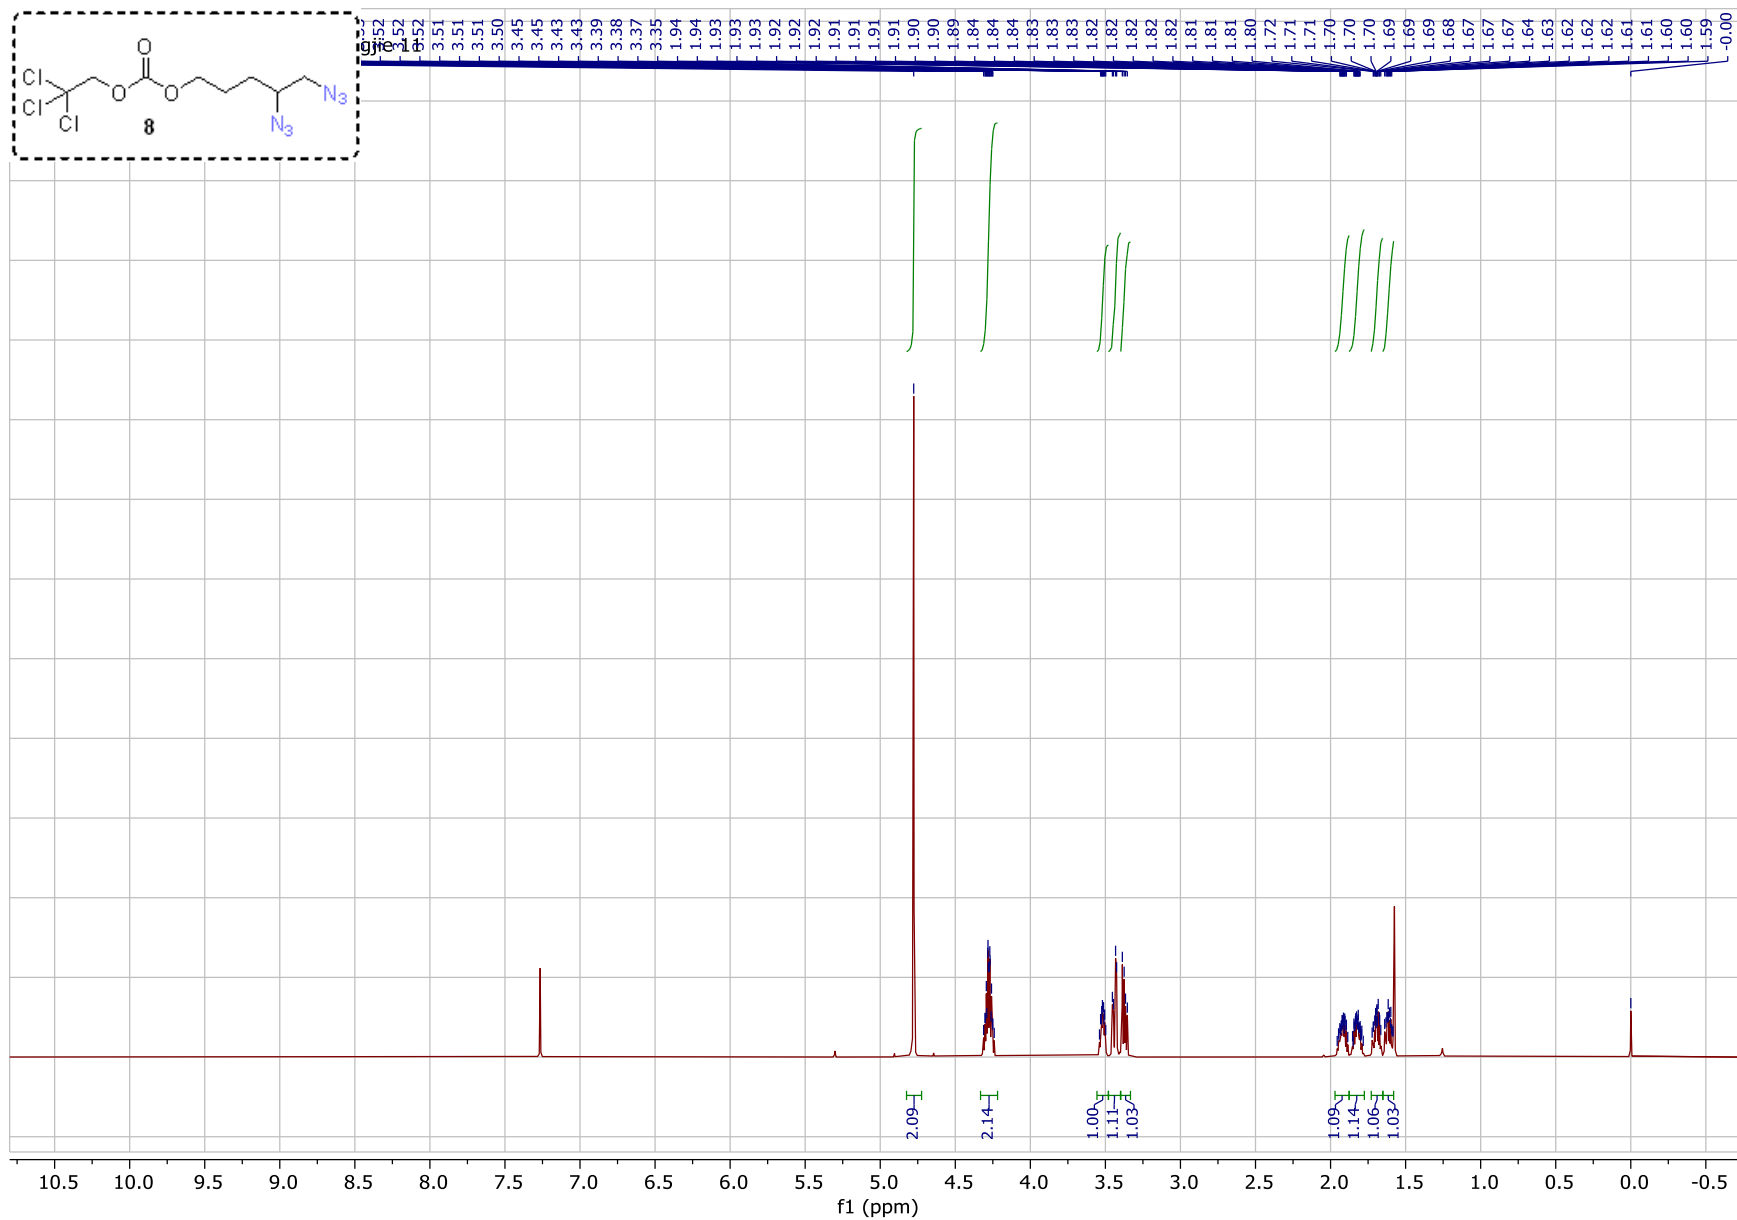



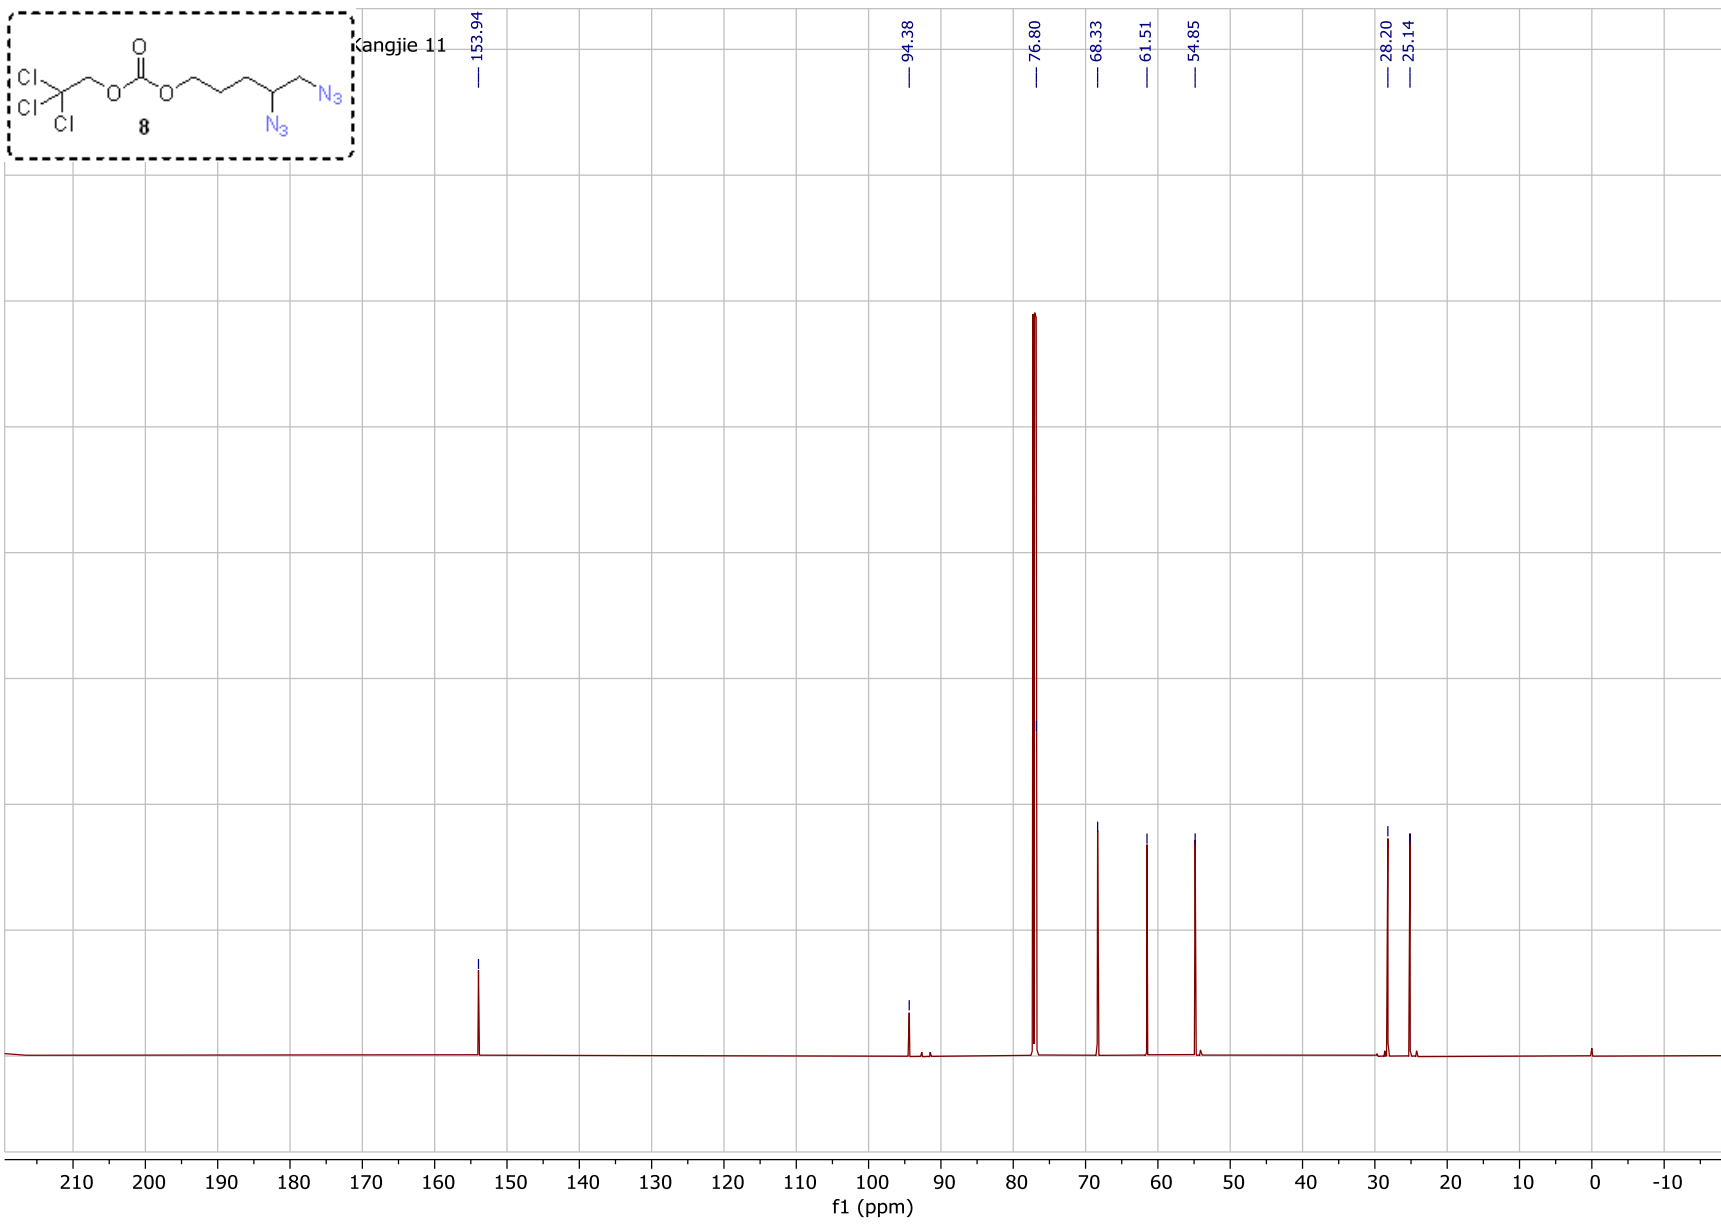

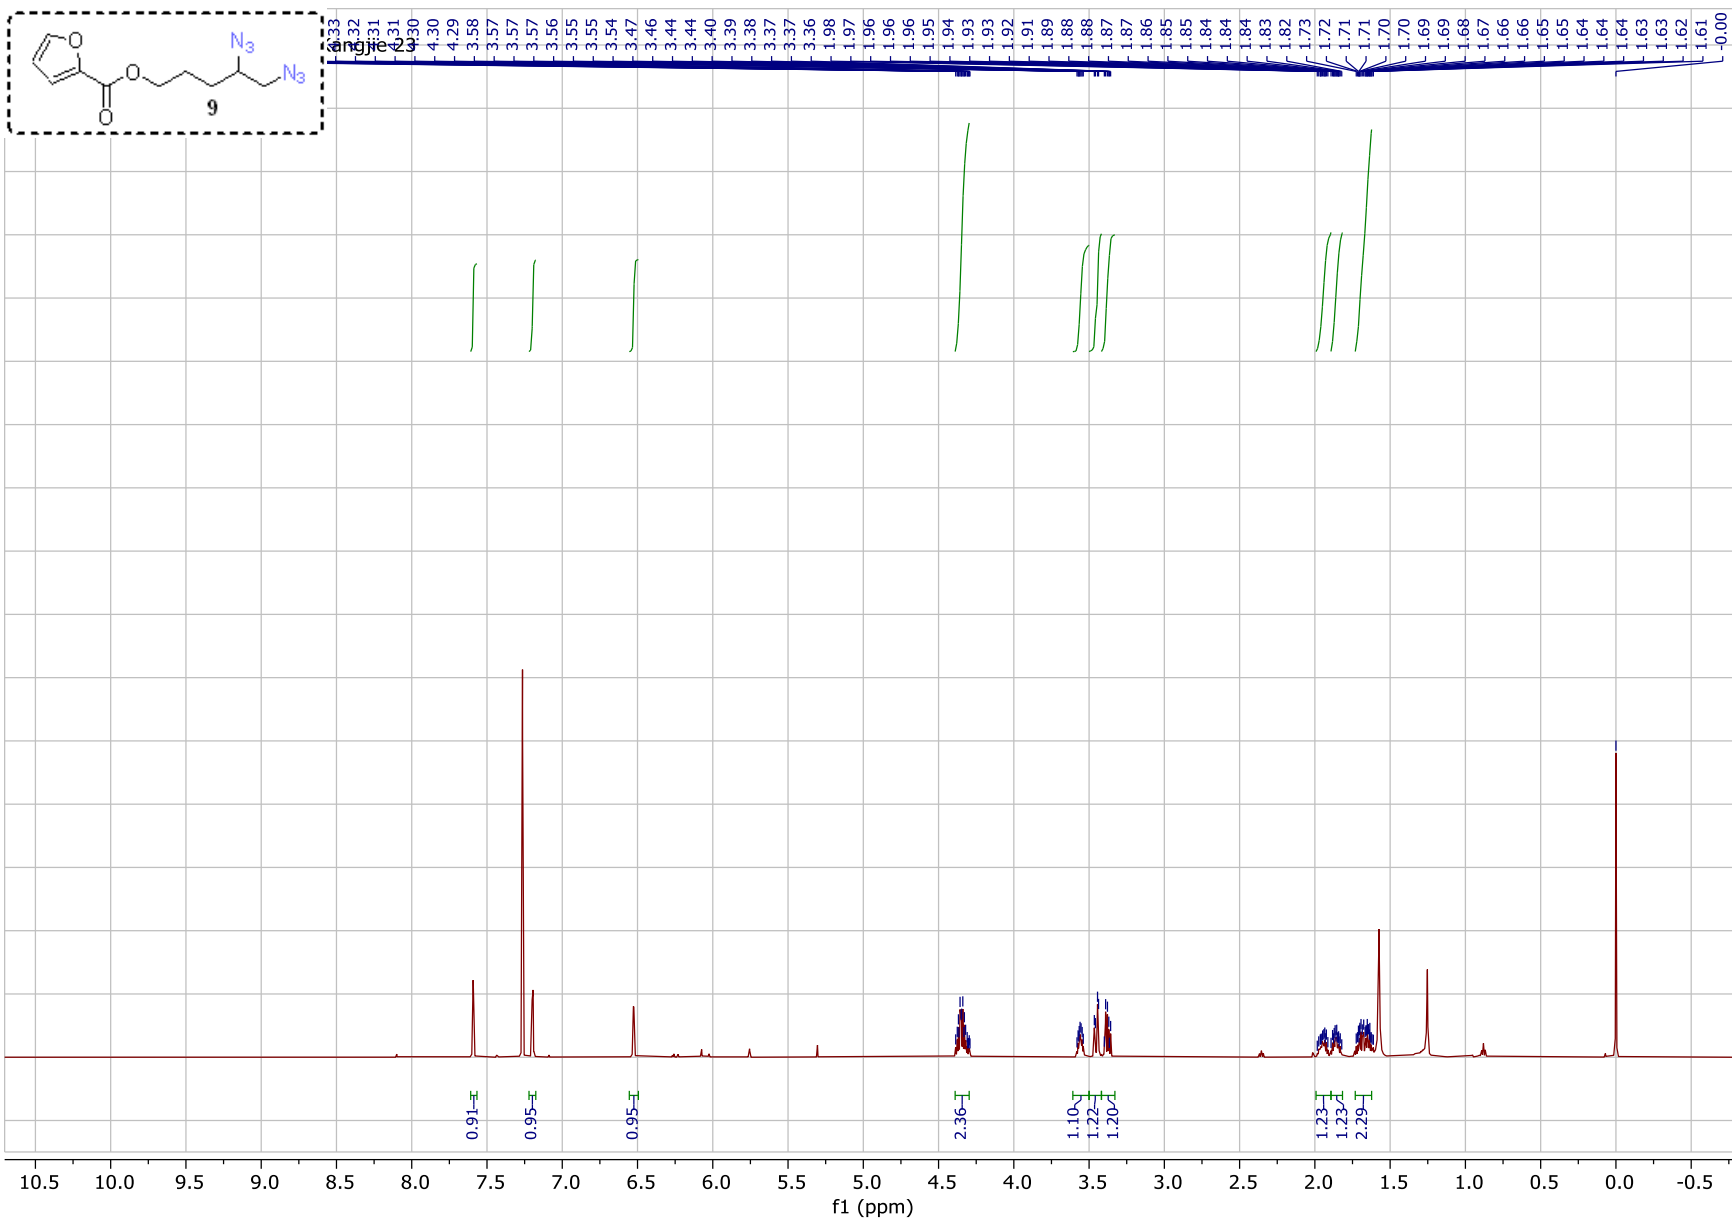

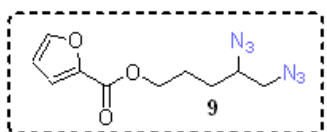

angjie 5

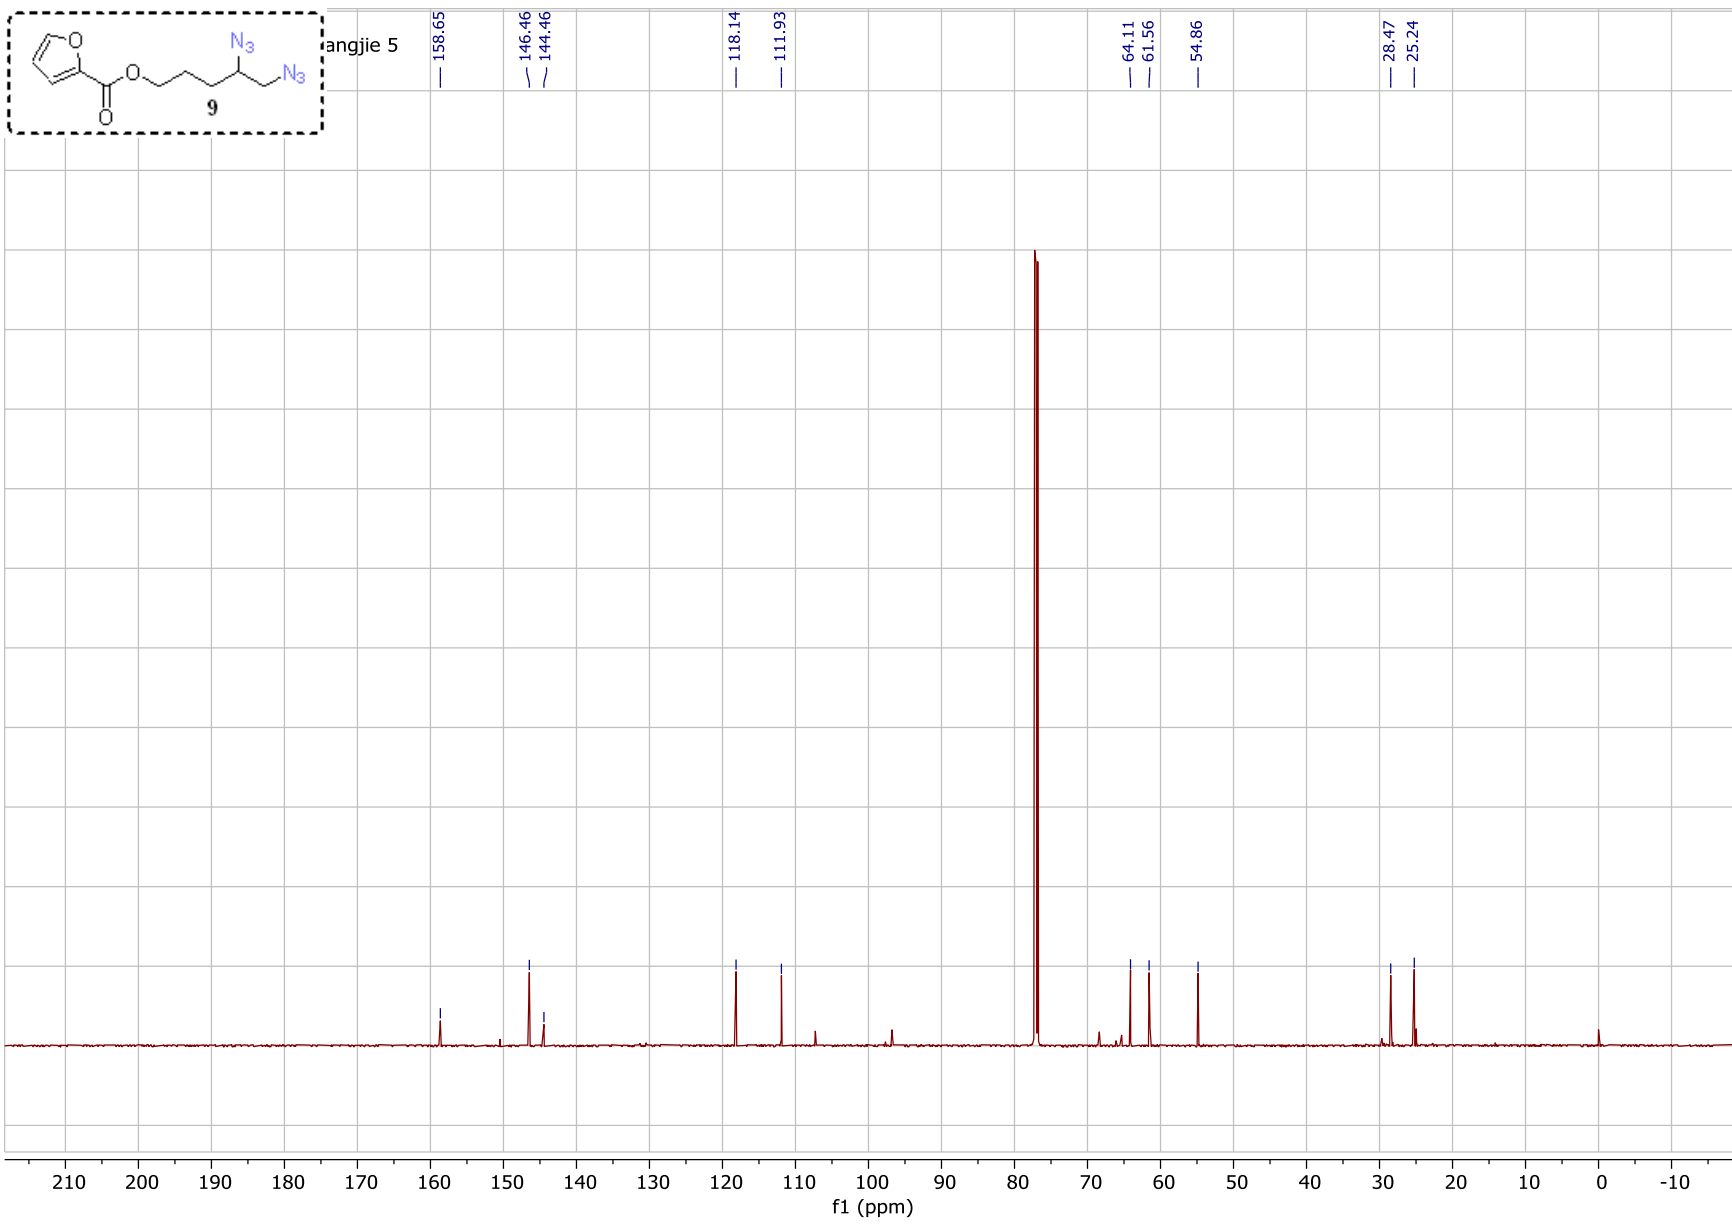

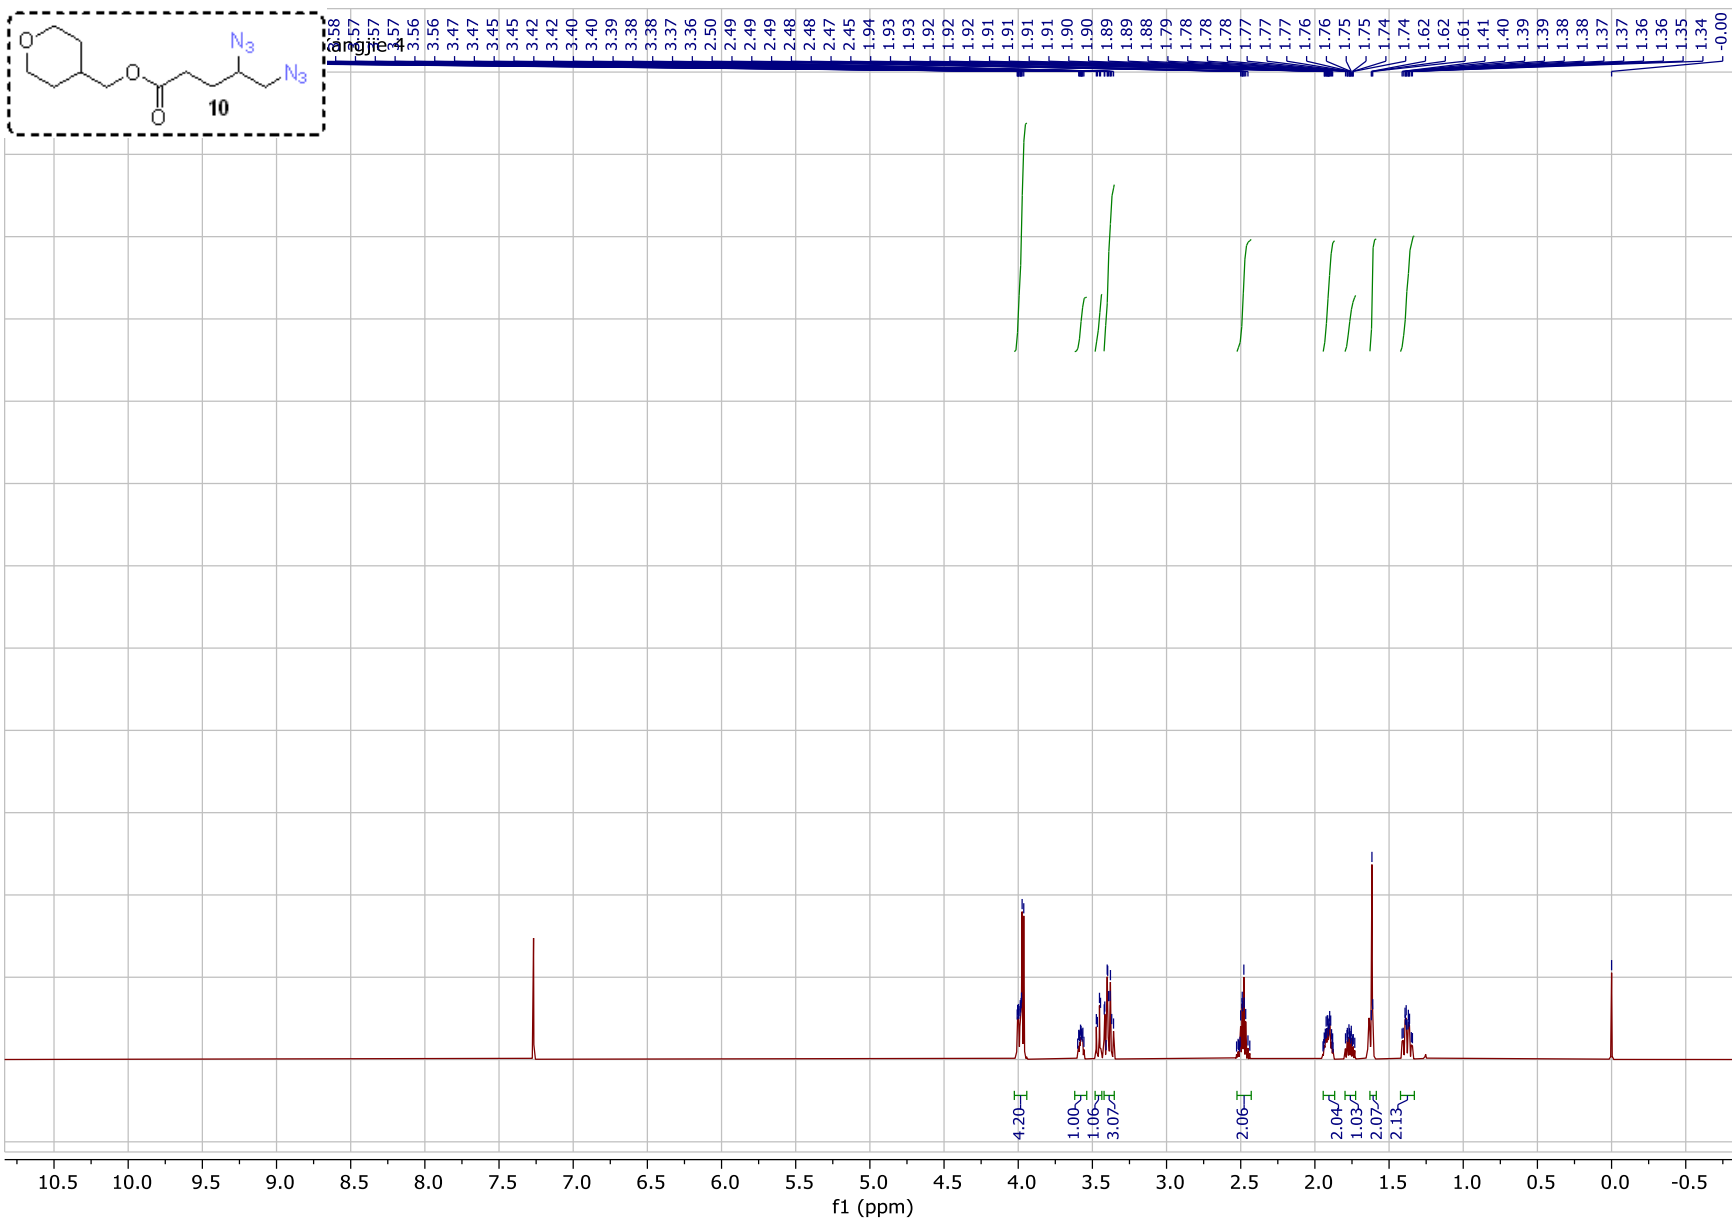

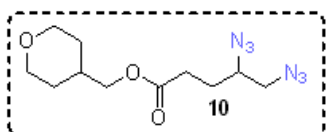

gije 4

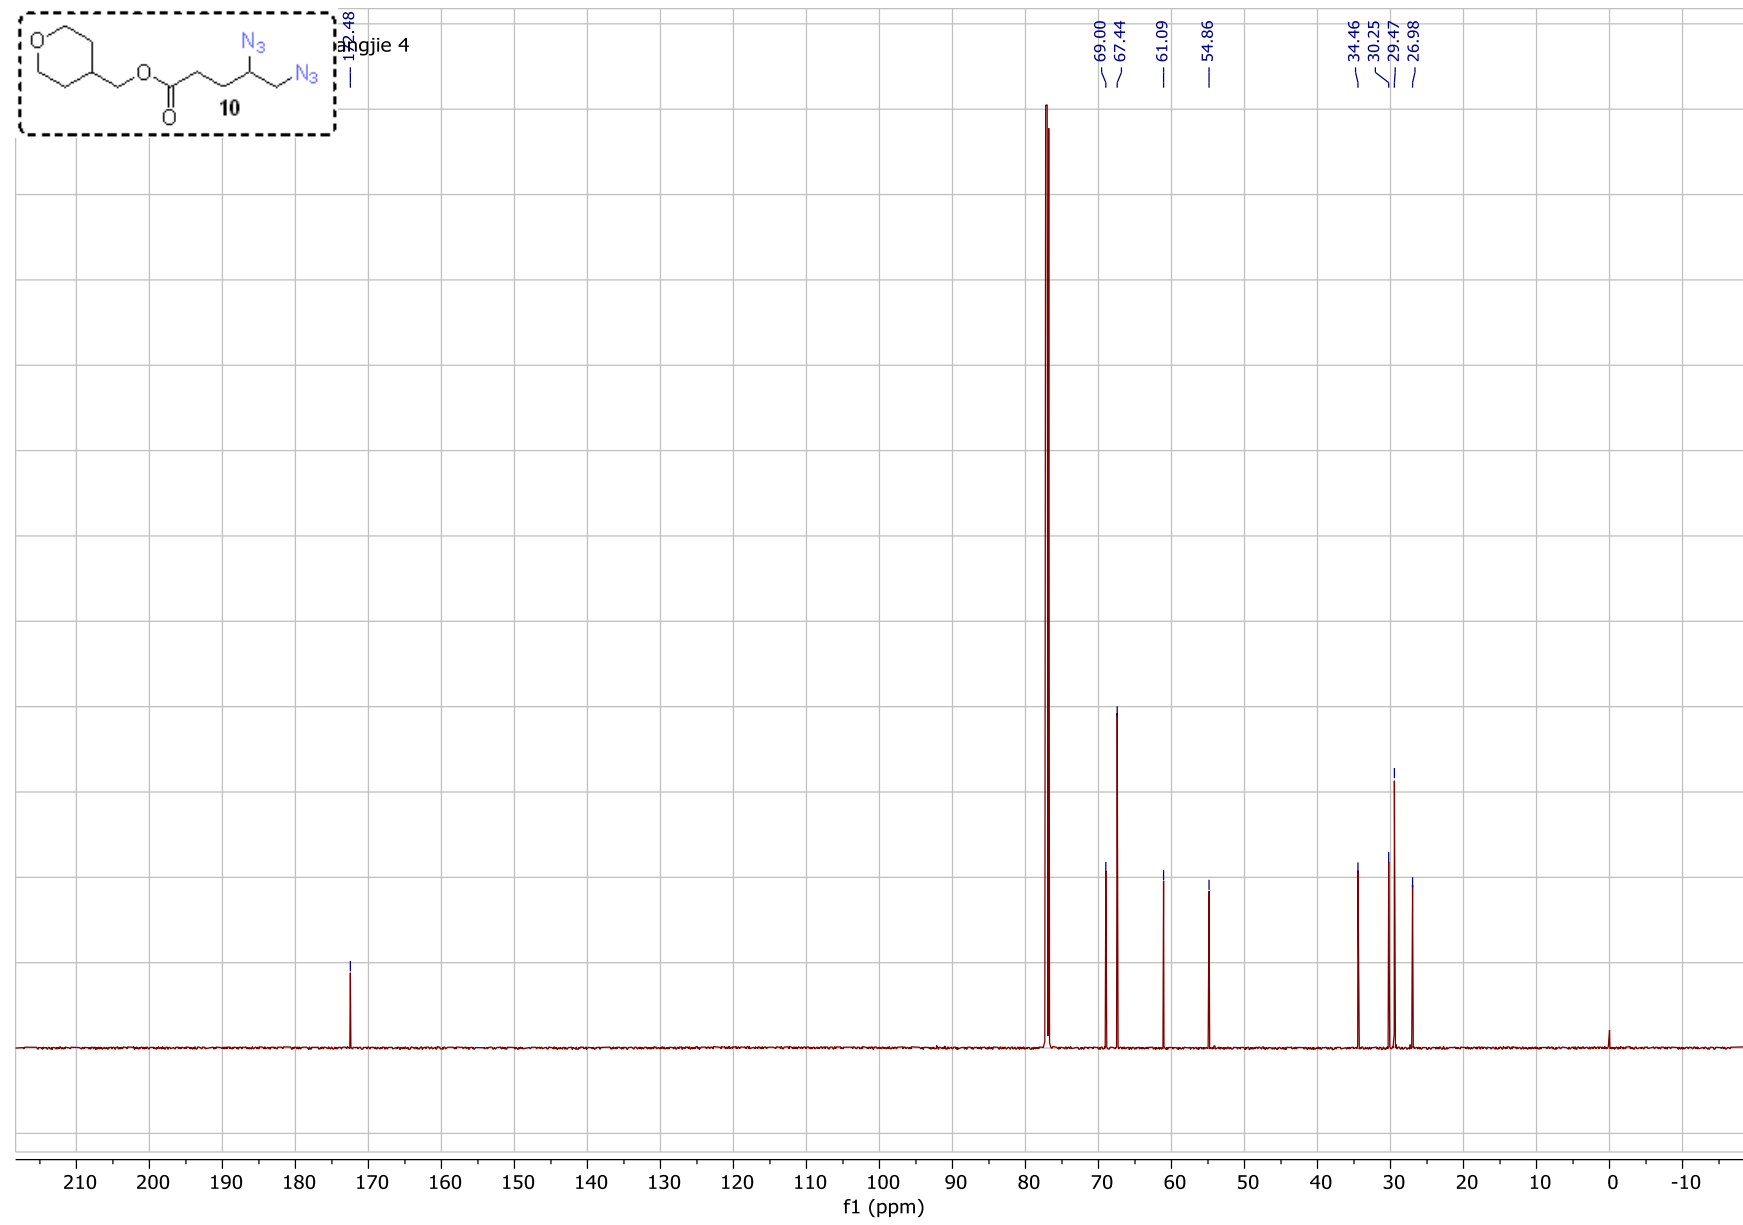



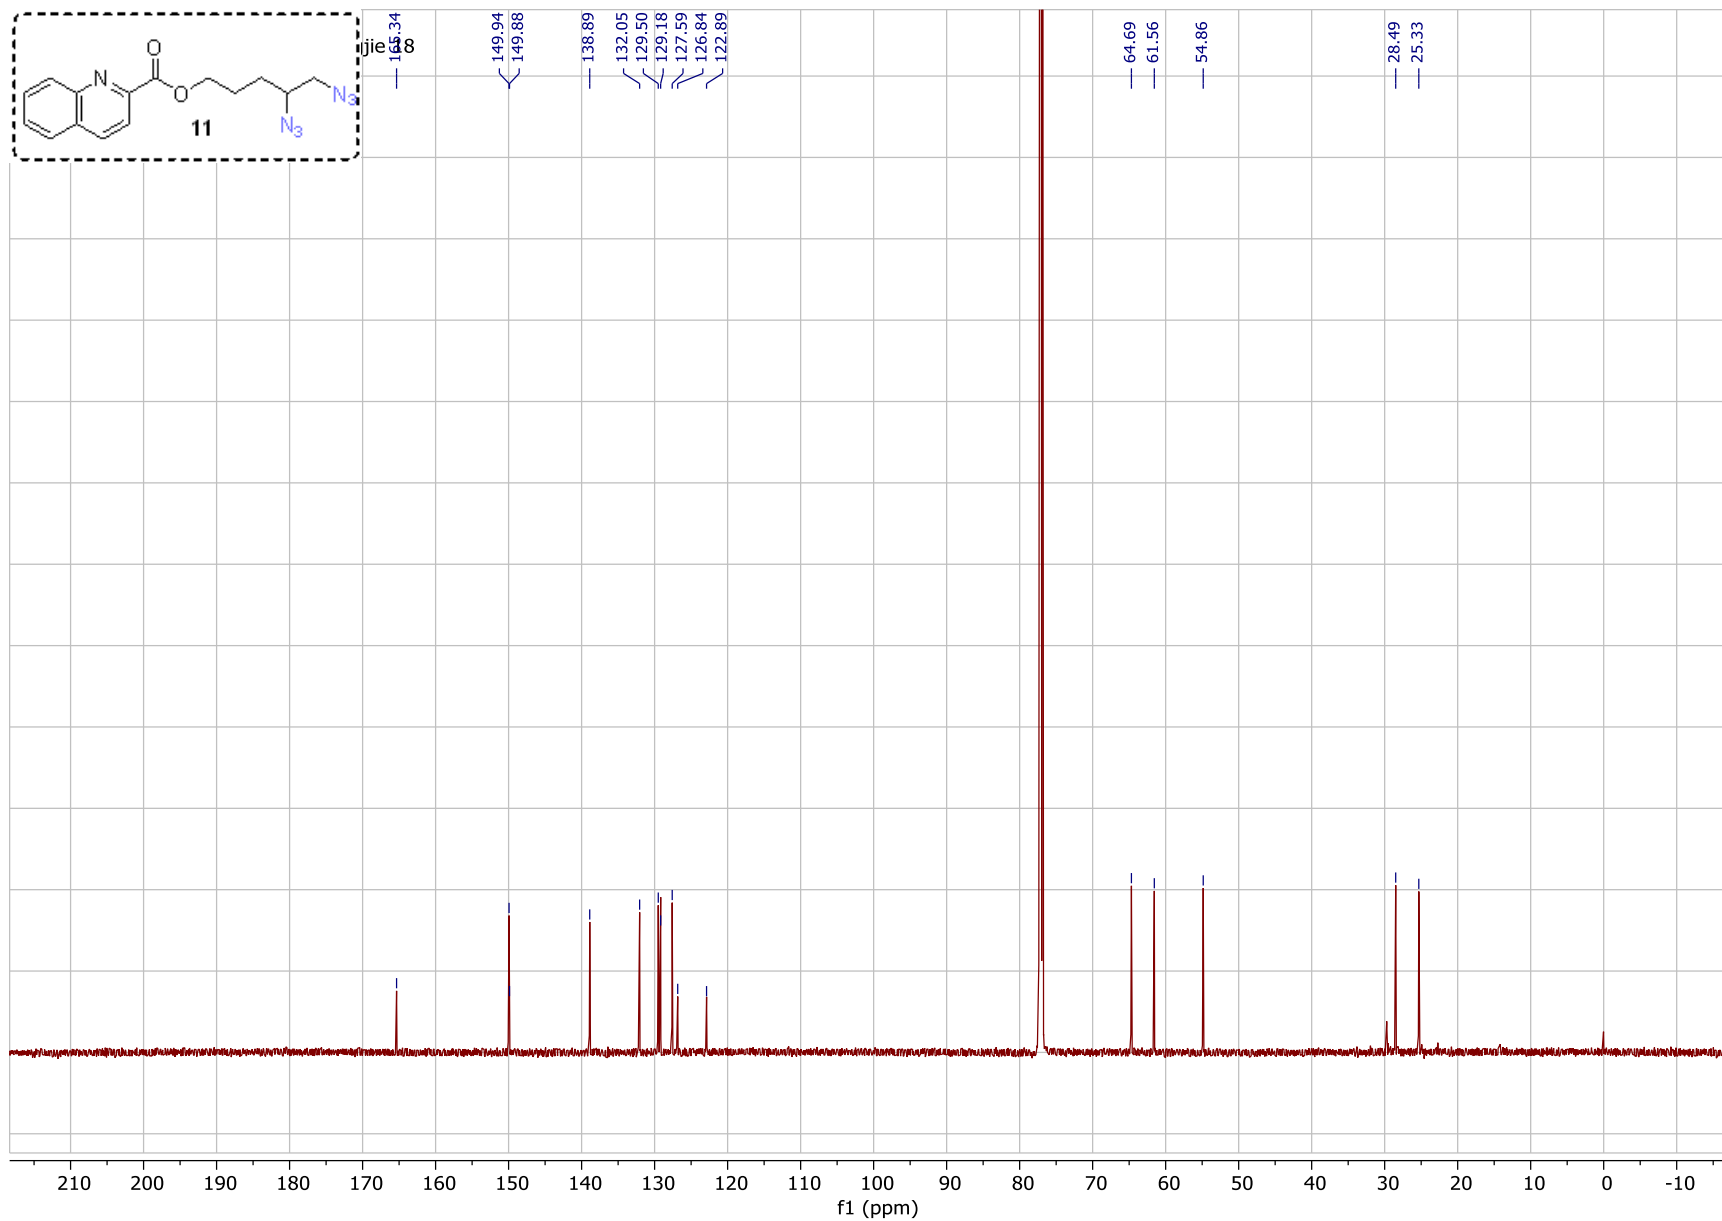

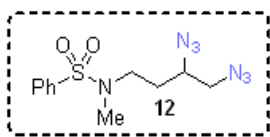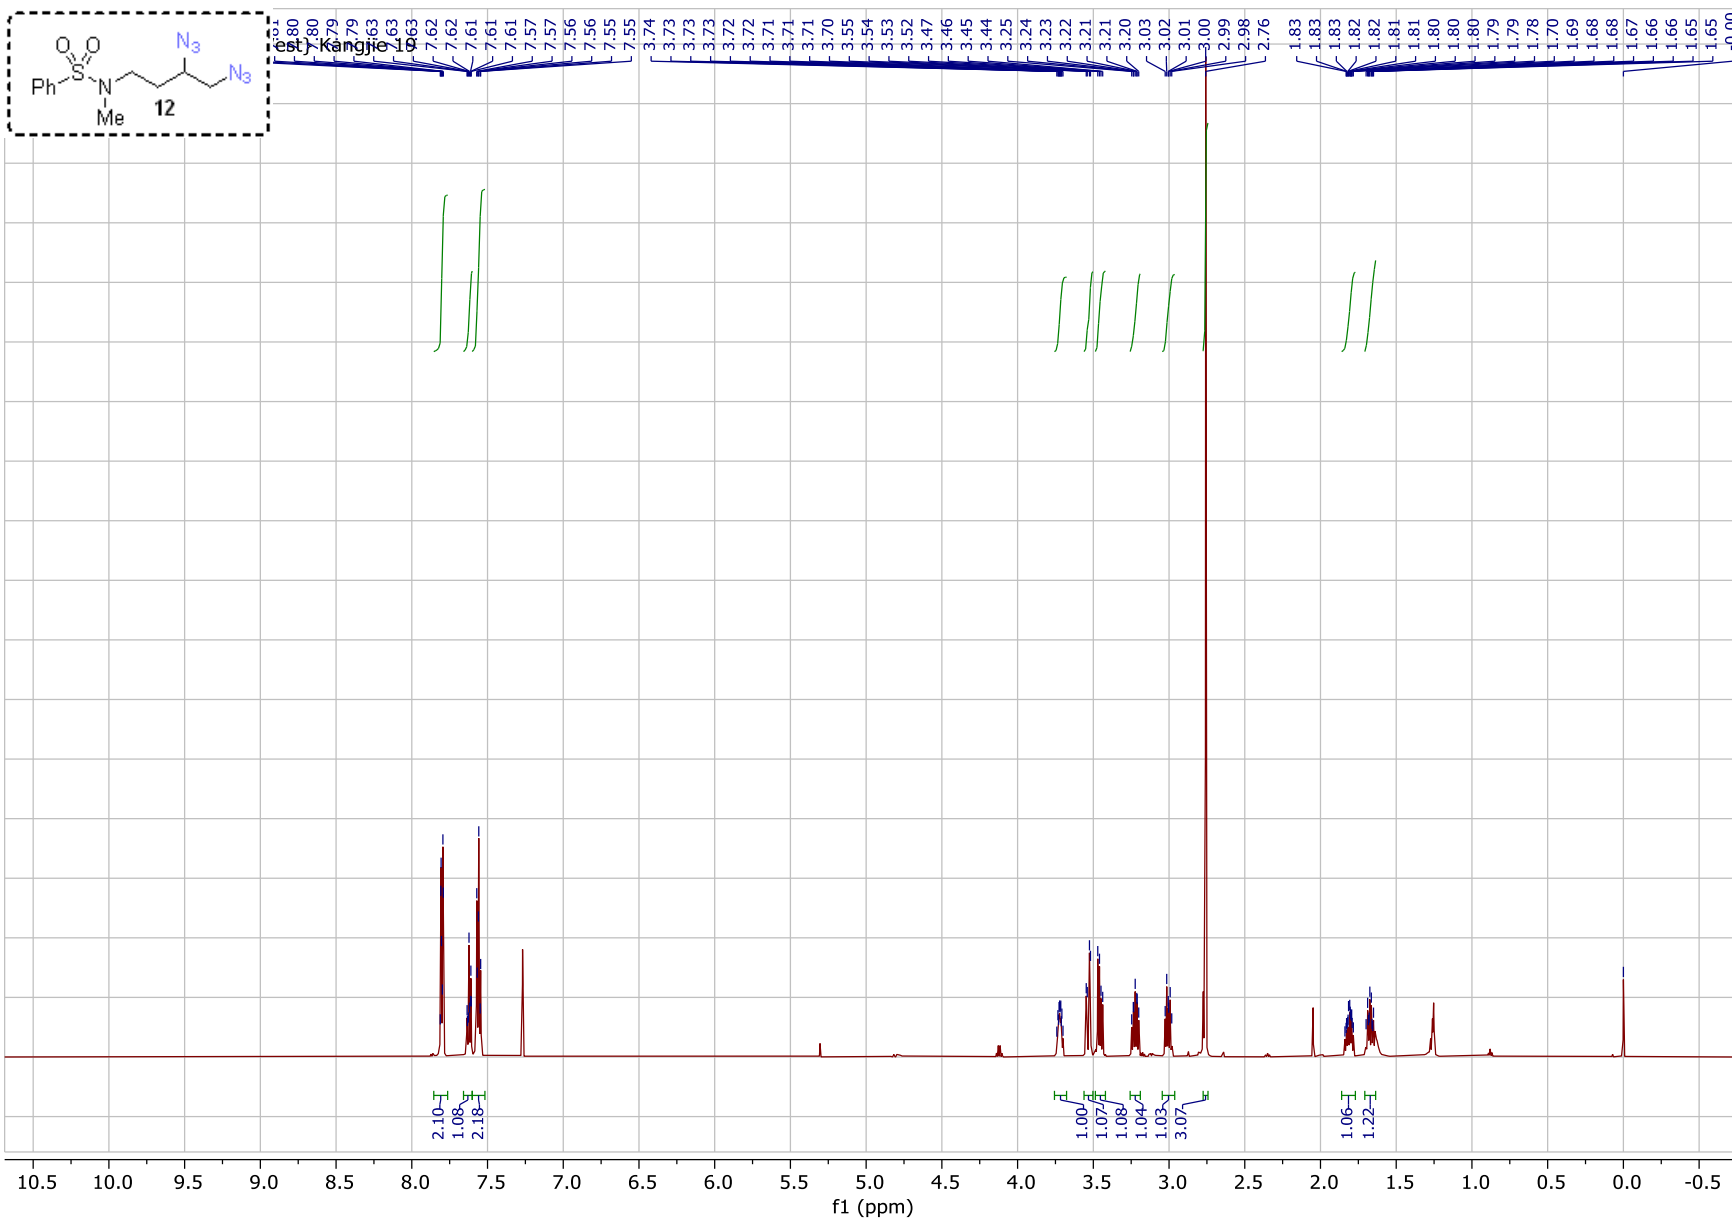



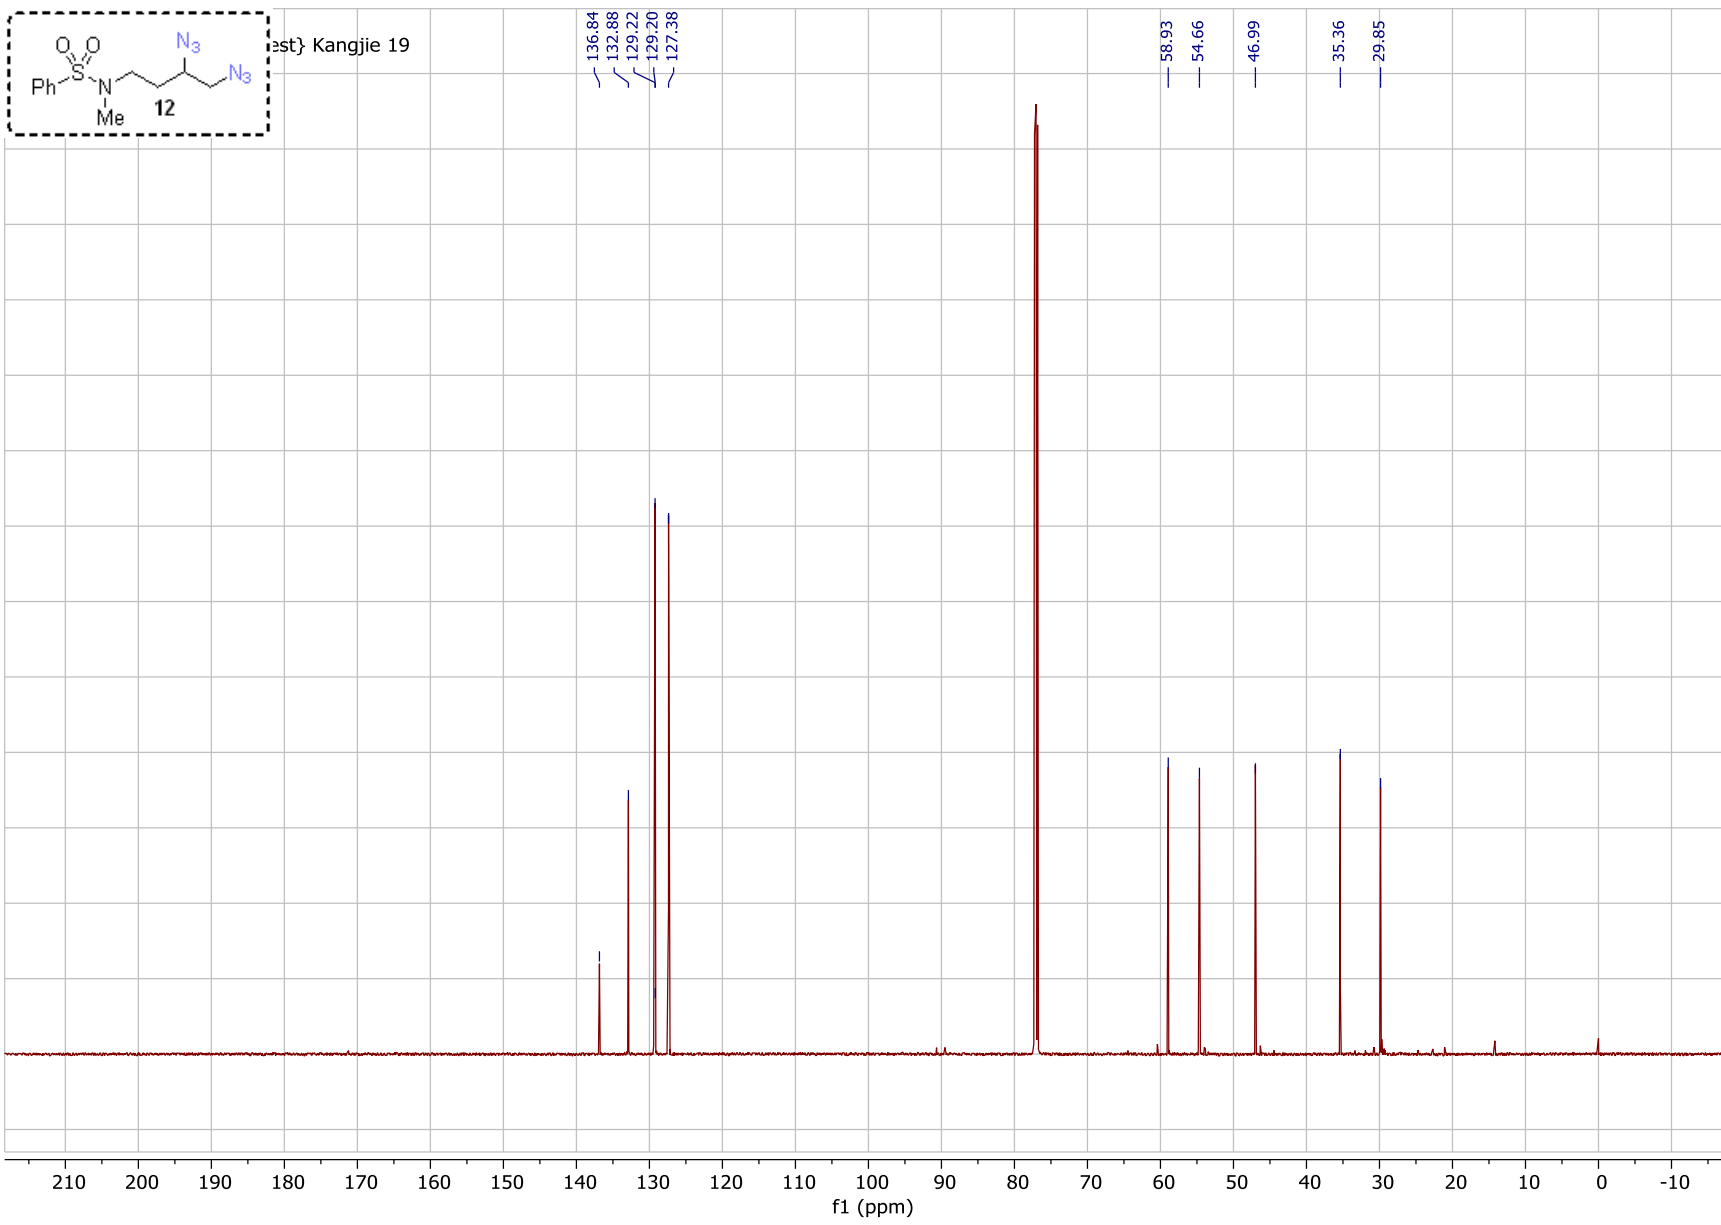

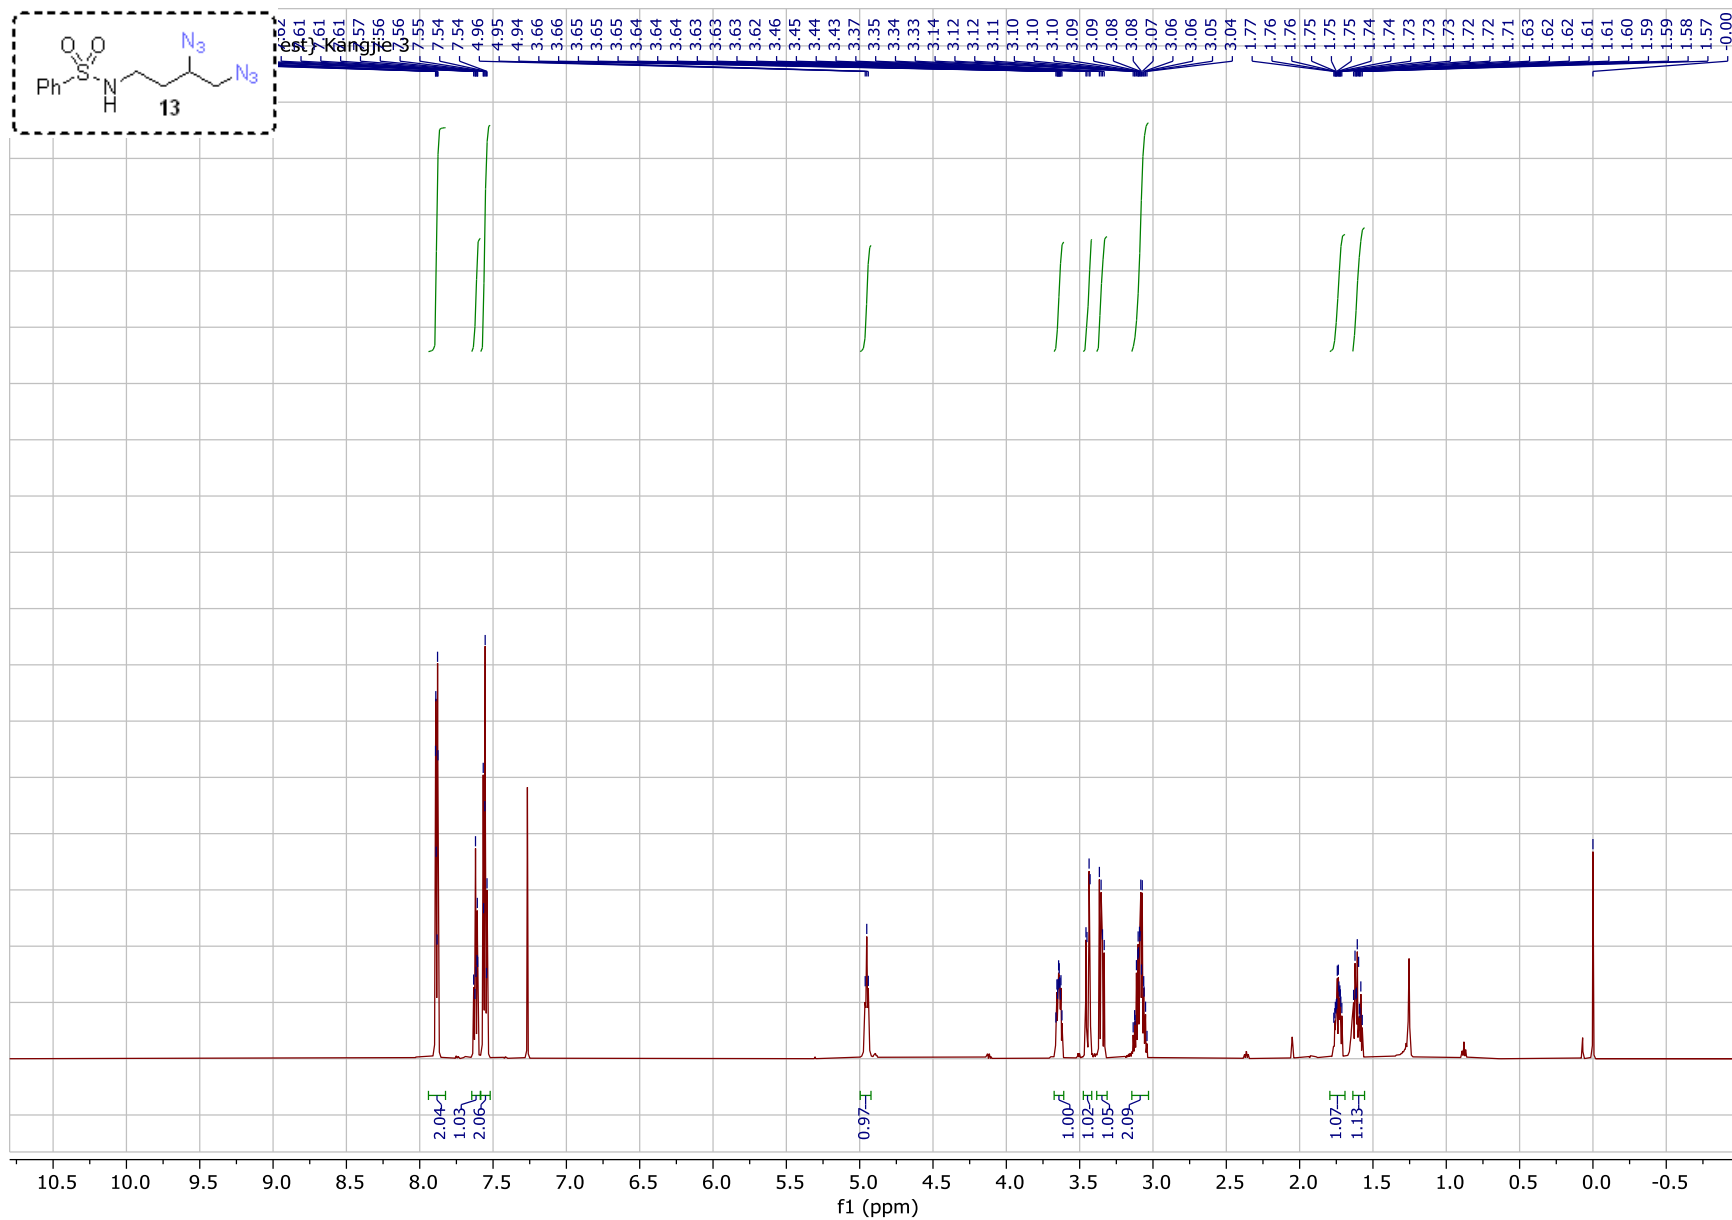

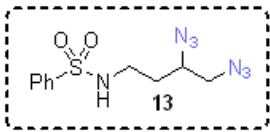

est} Kangjie 3

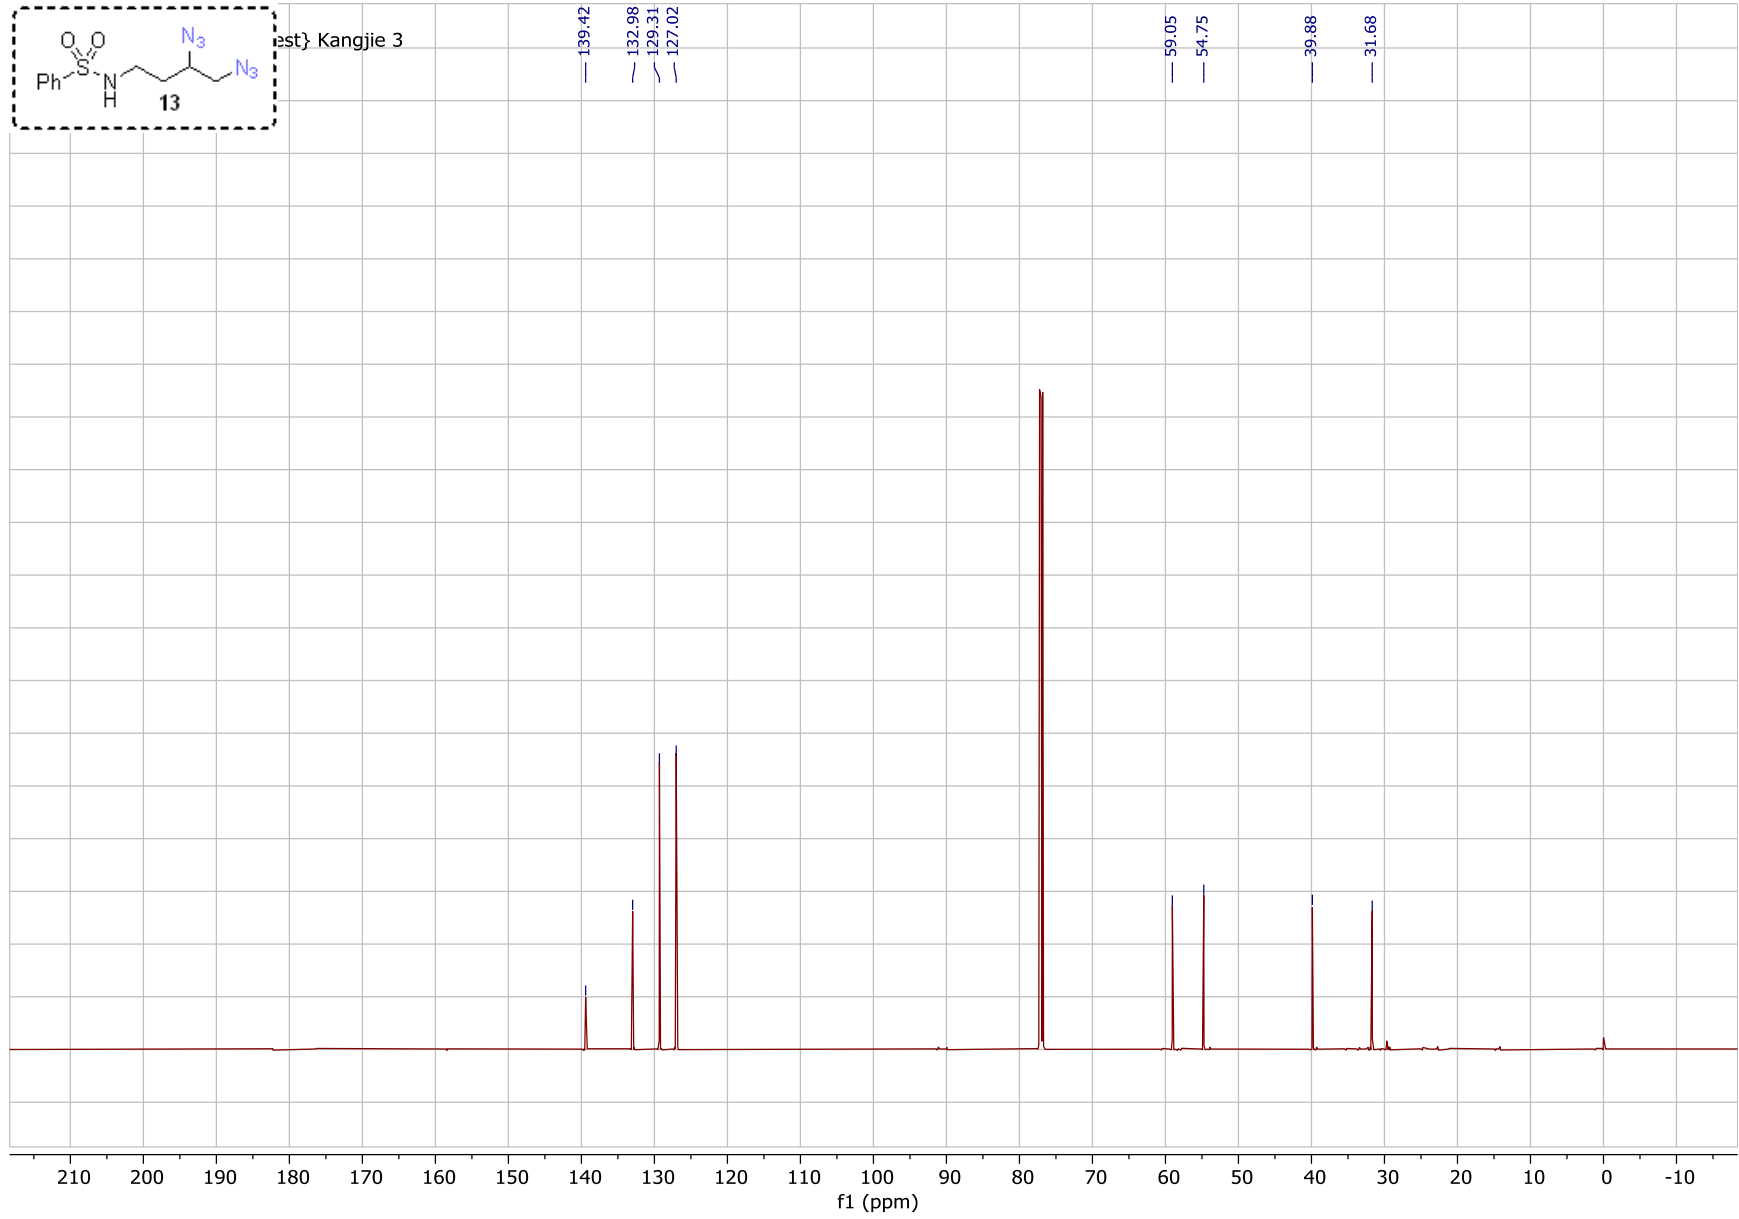

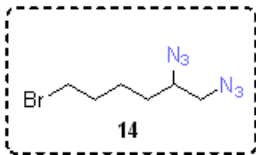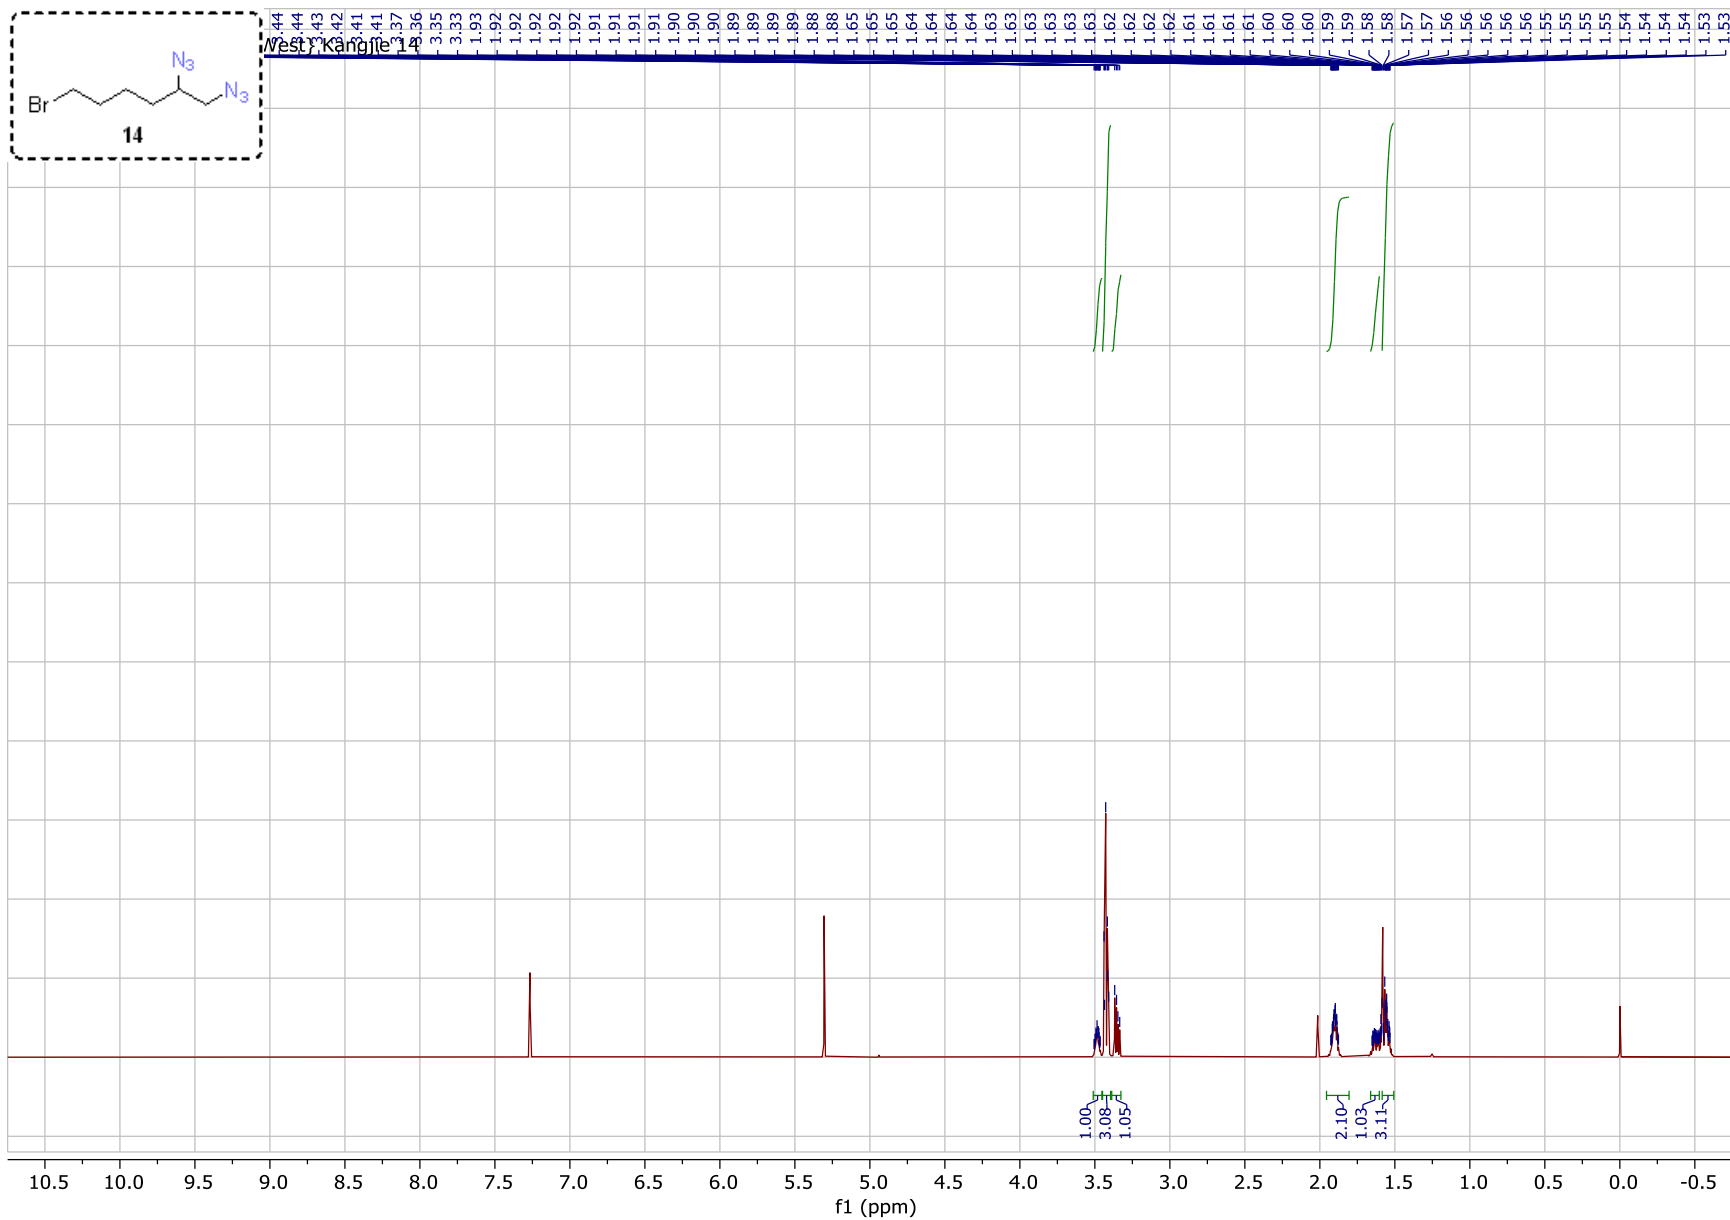

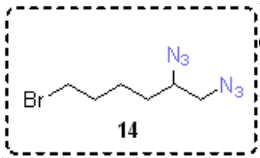

West\ Kangjie 14

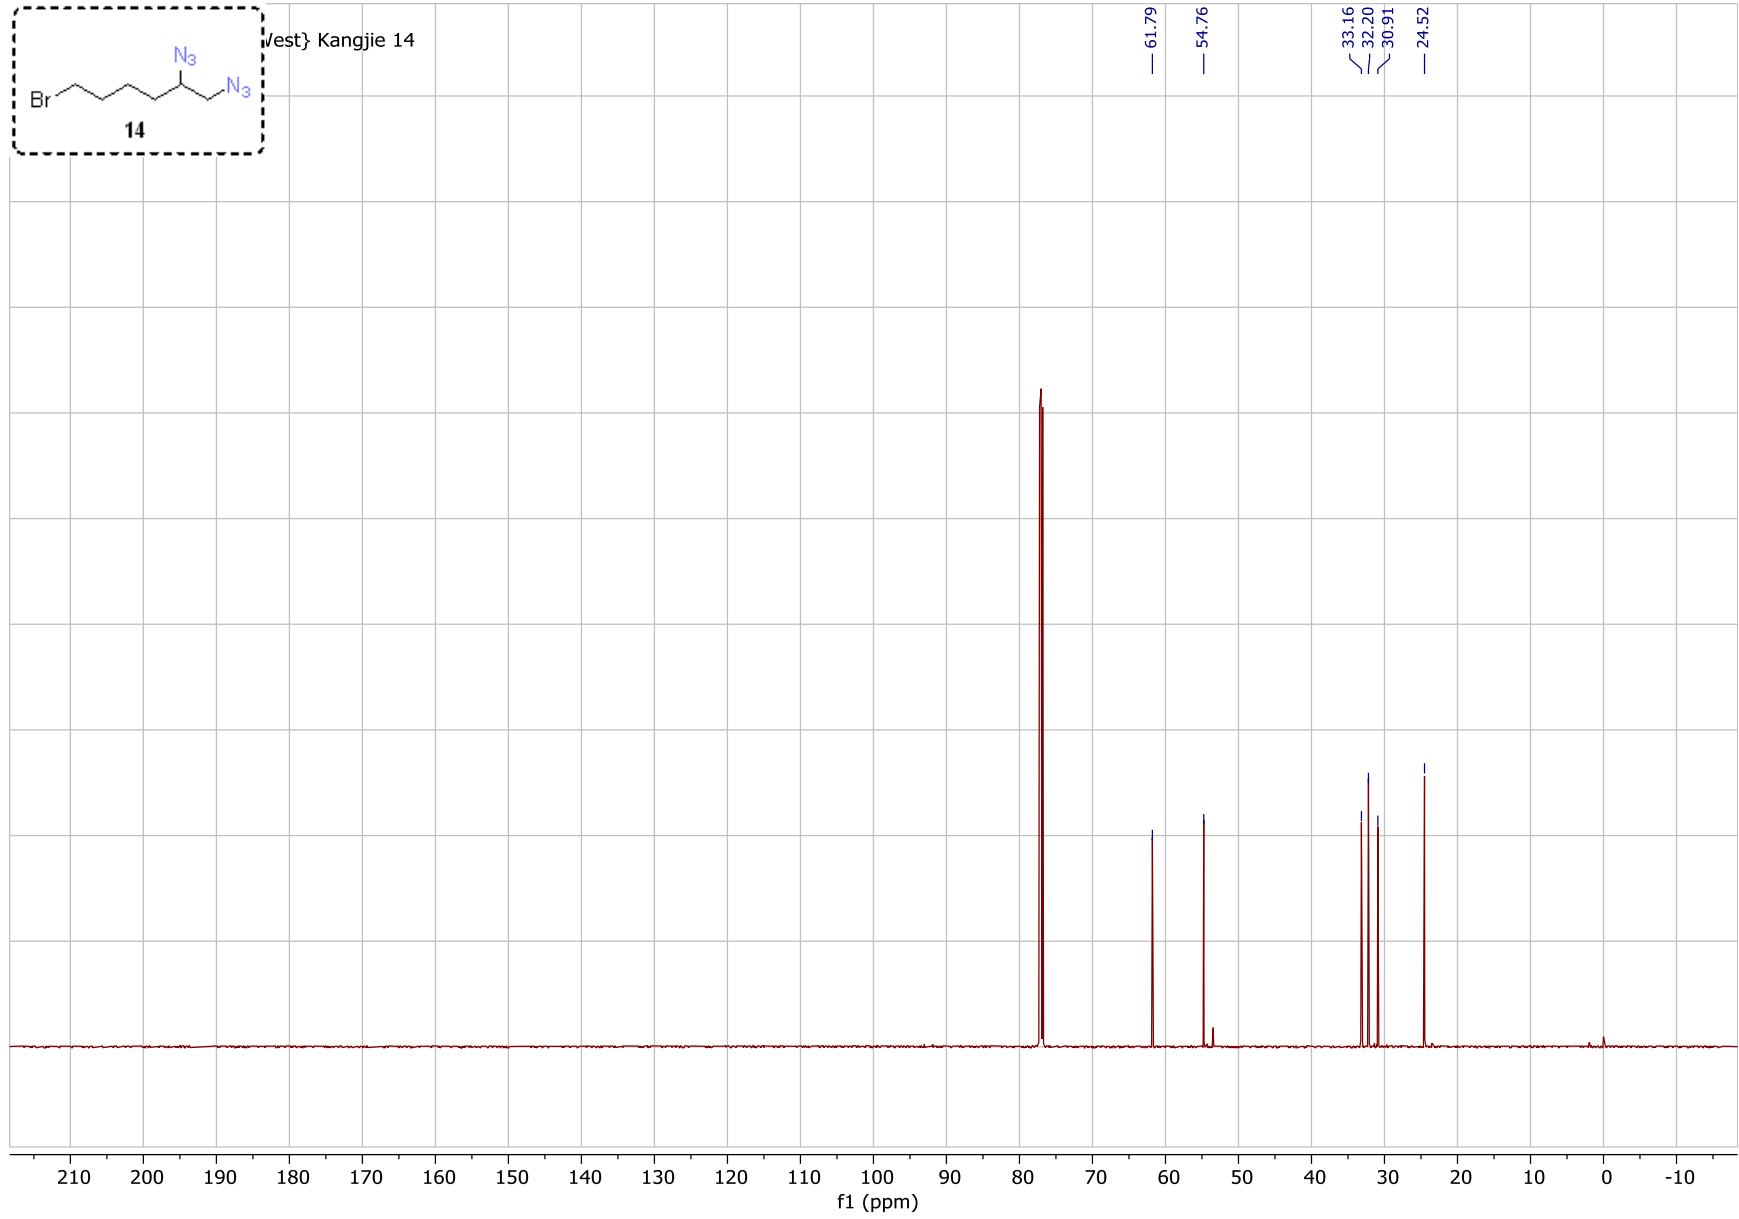

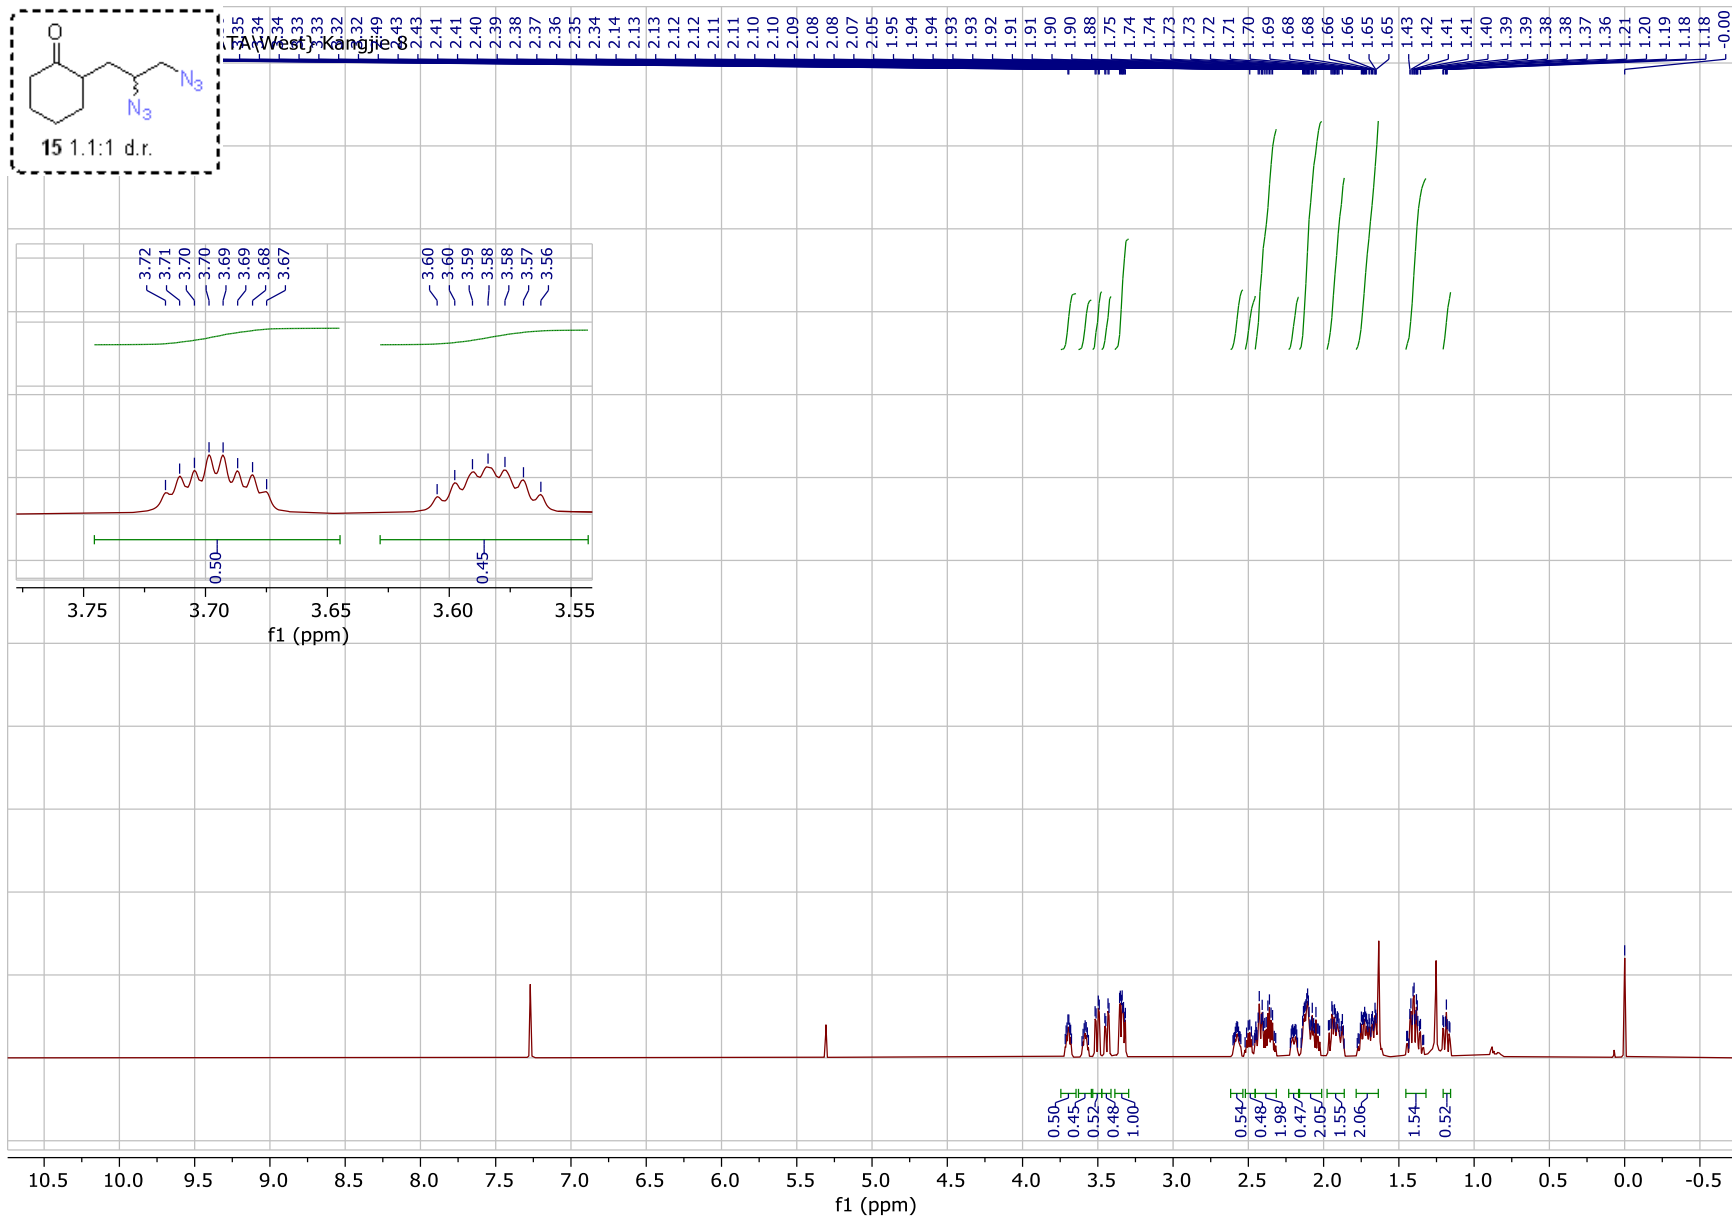

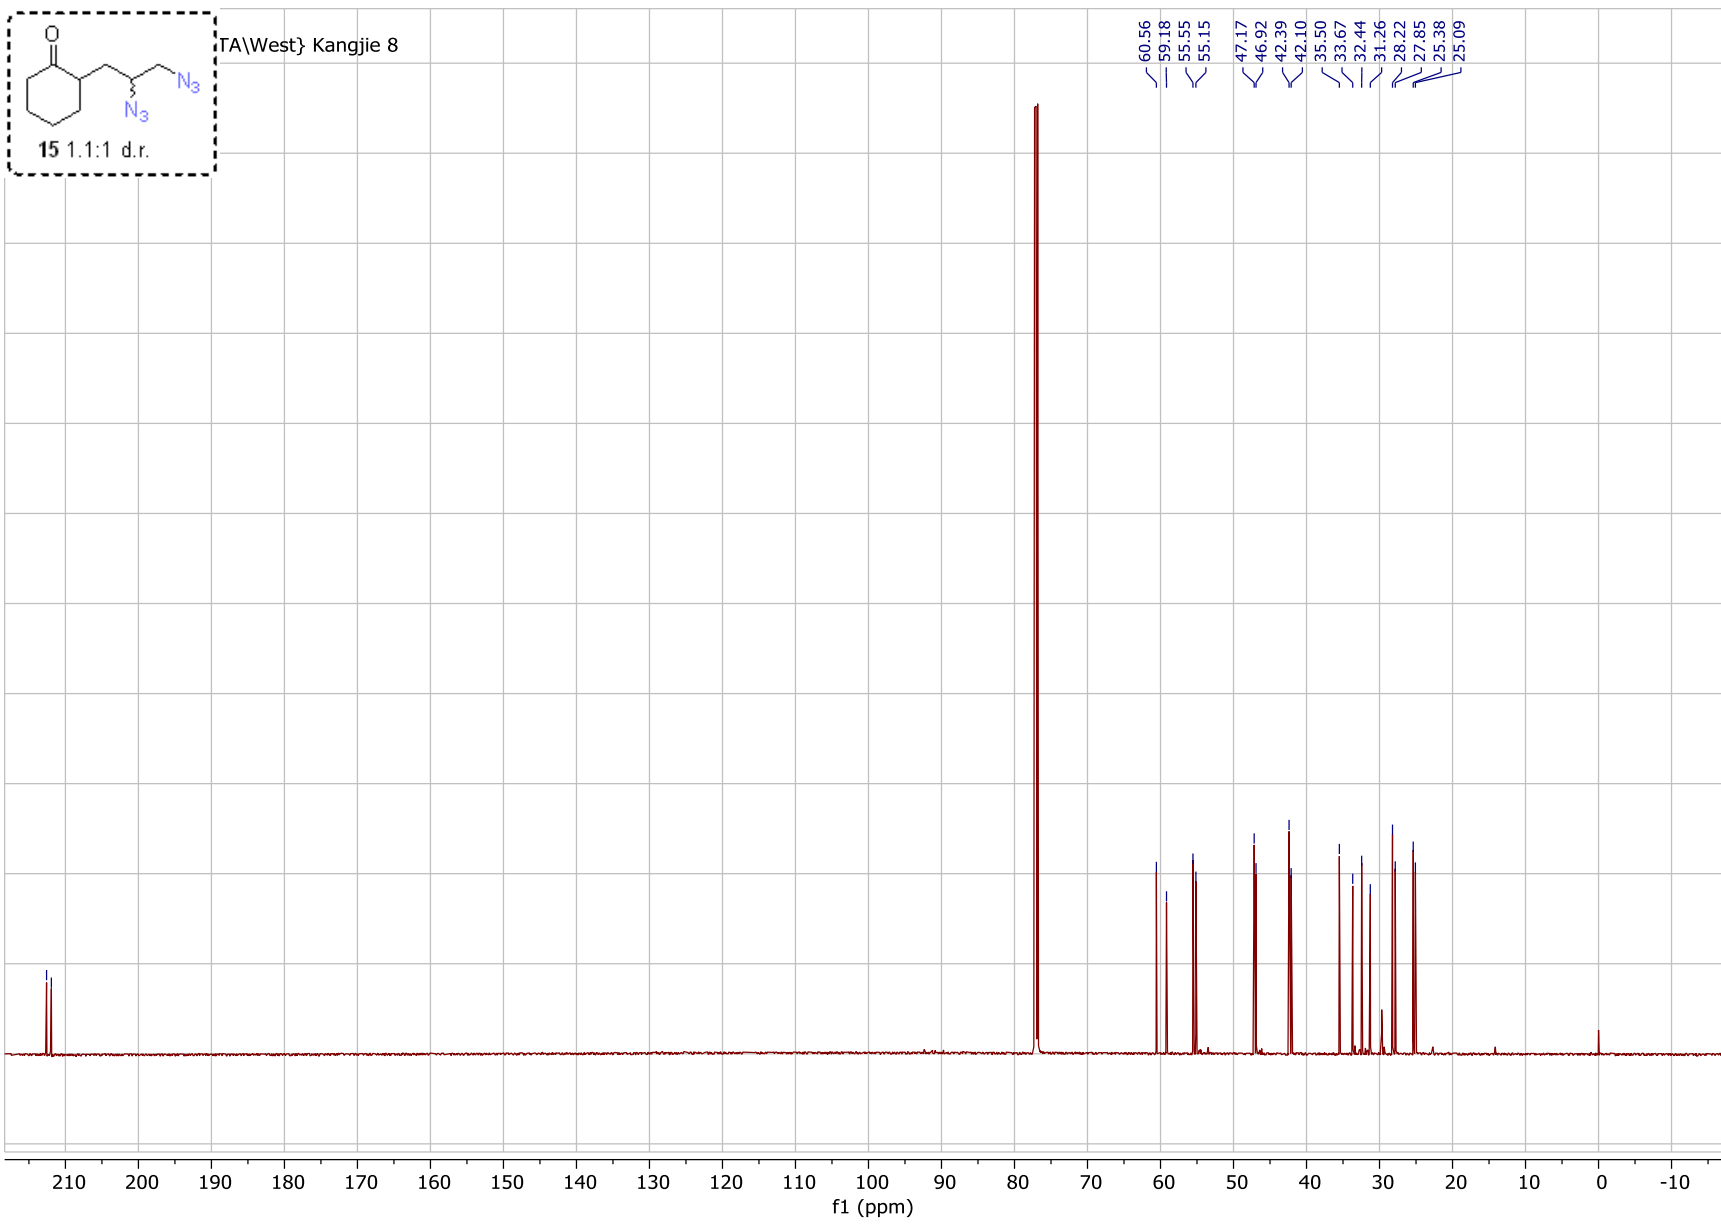





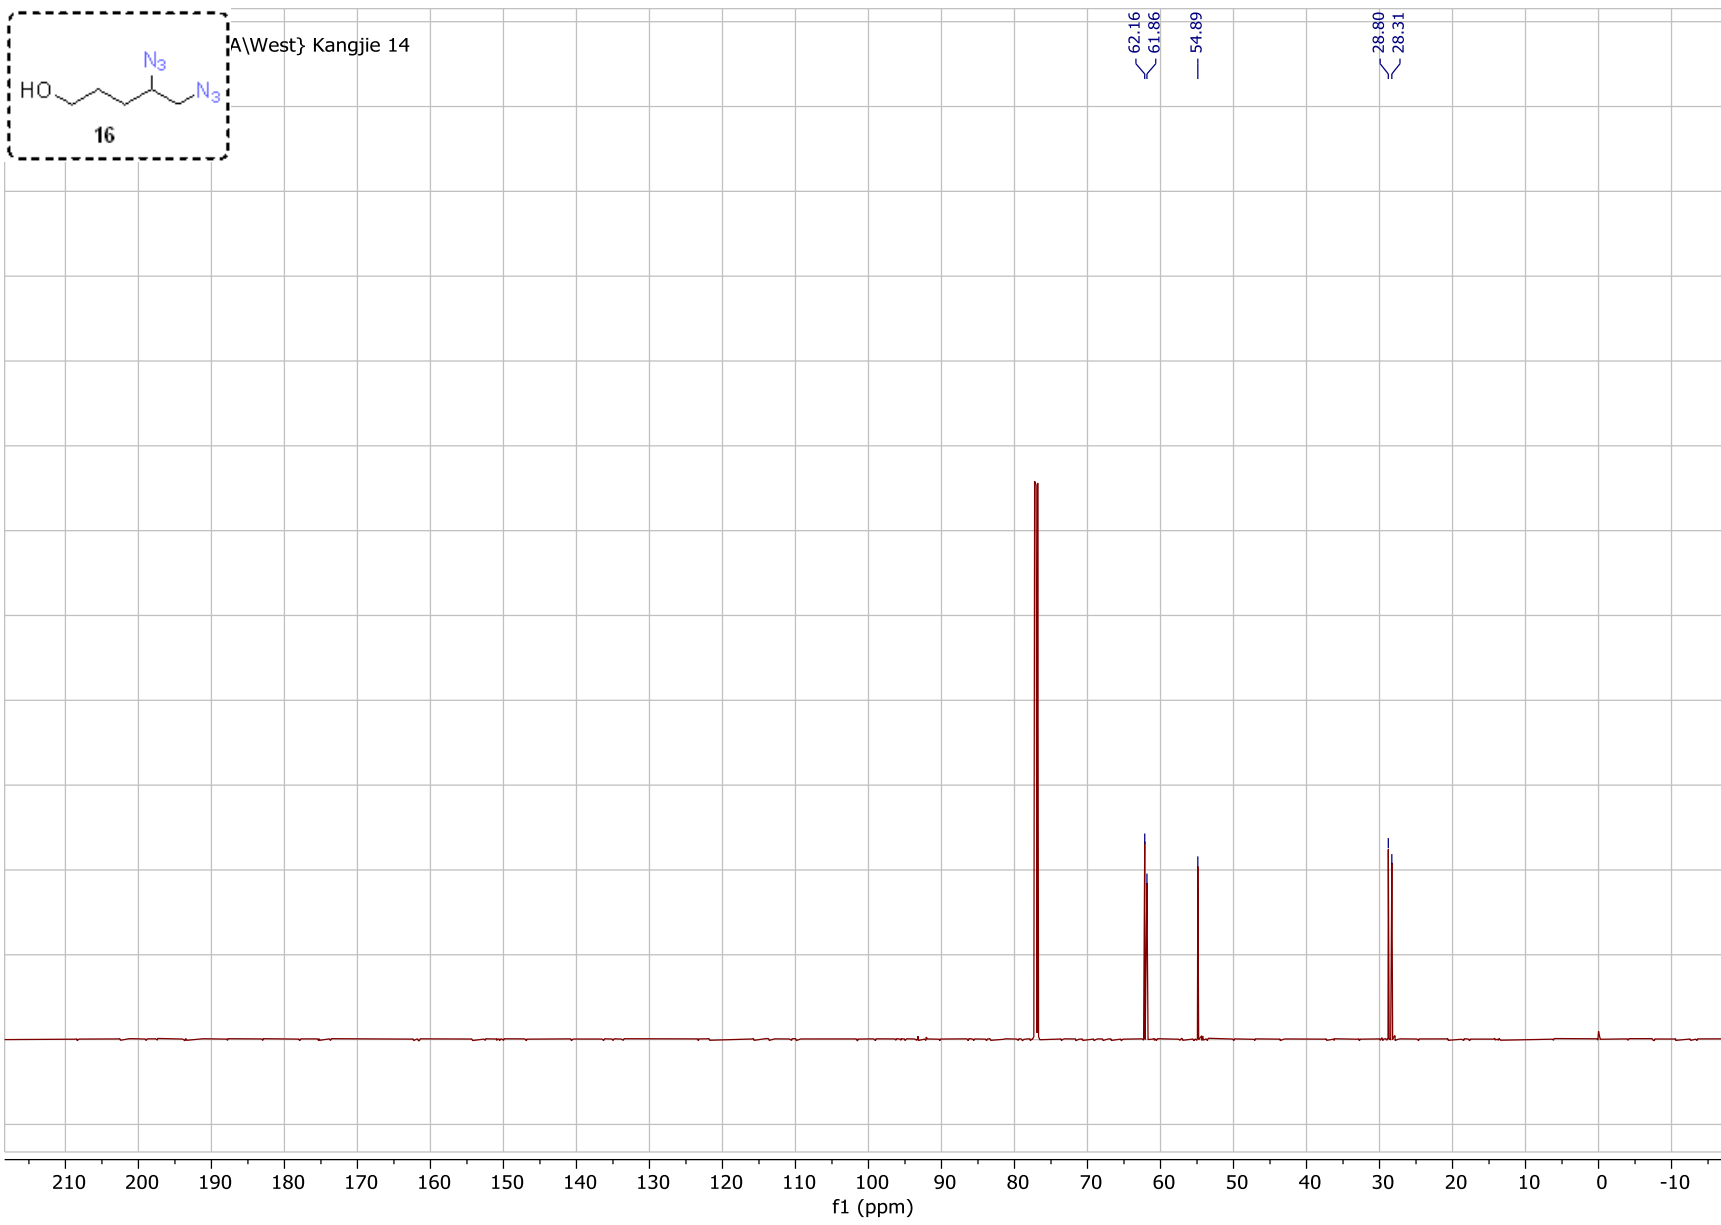

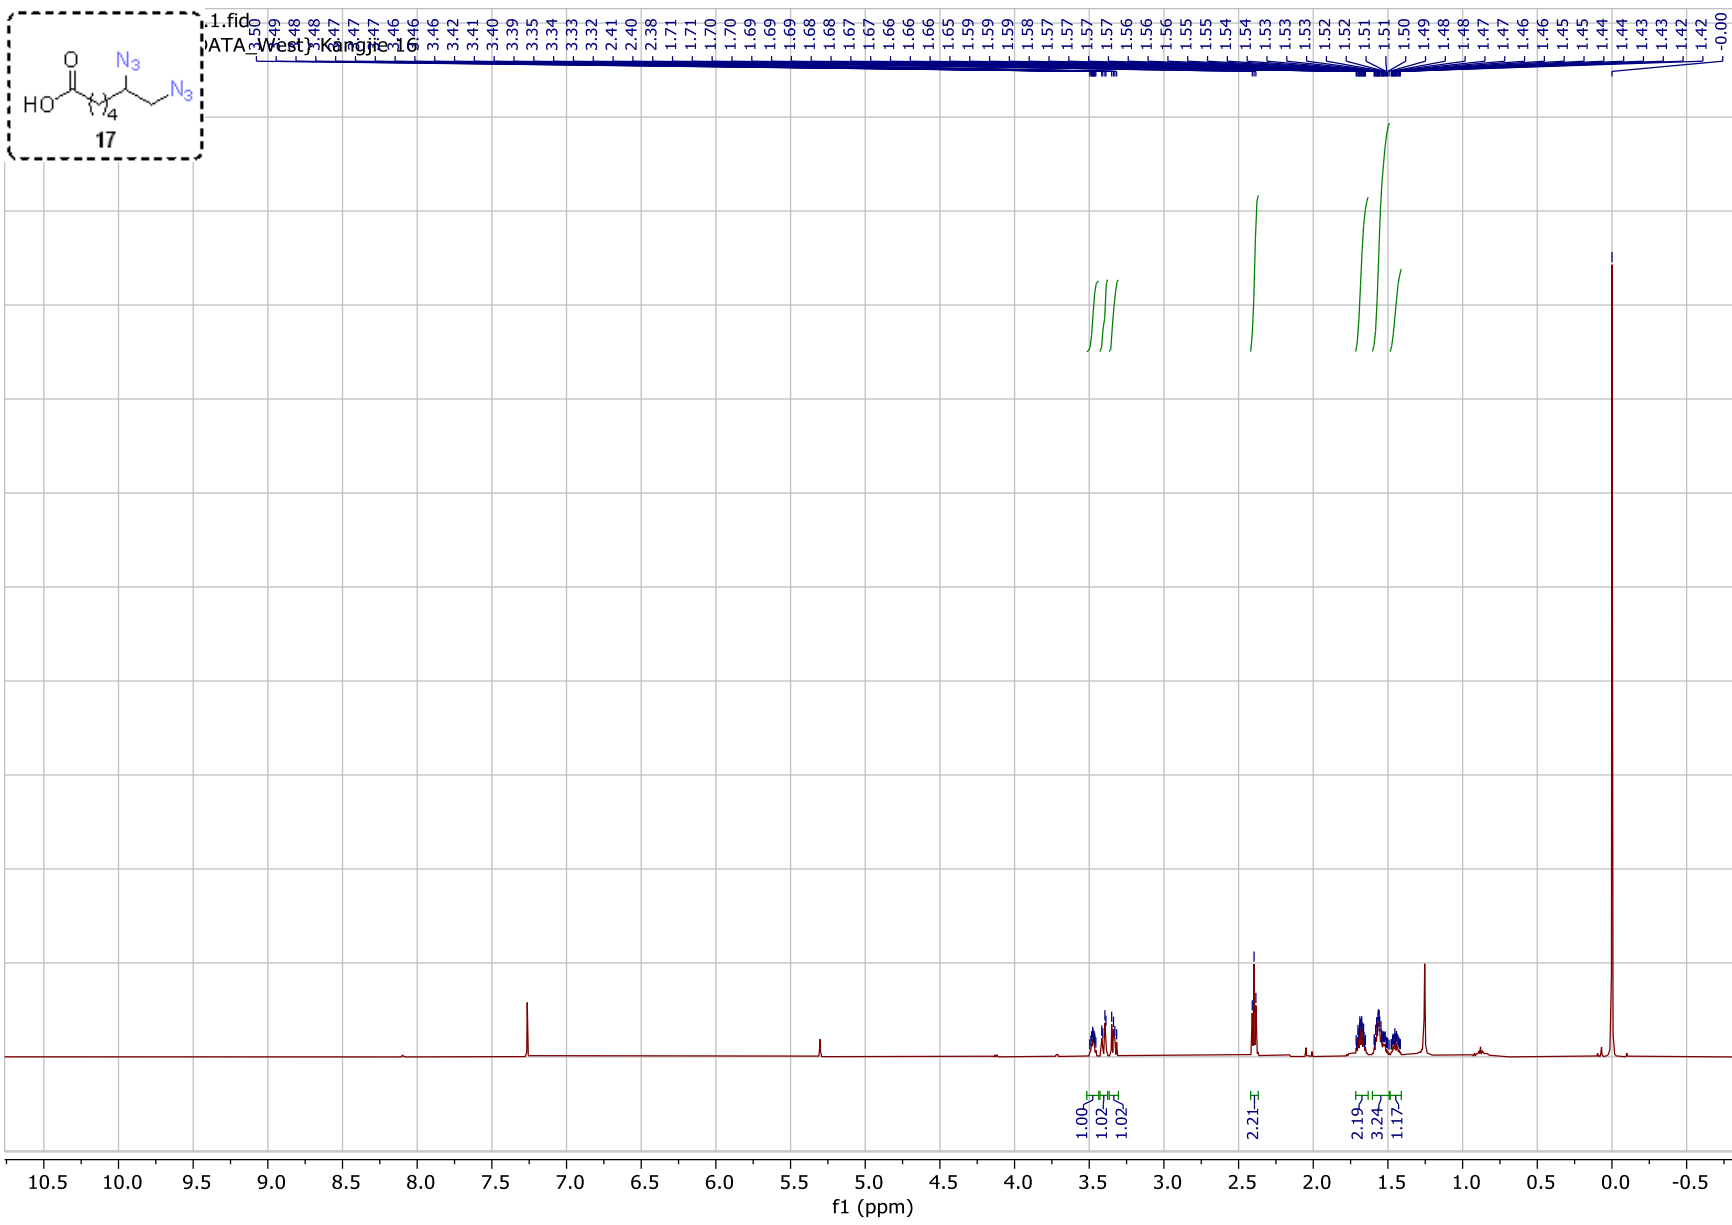

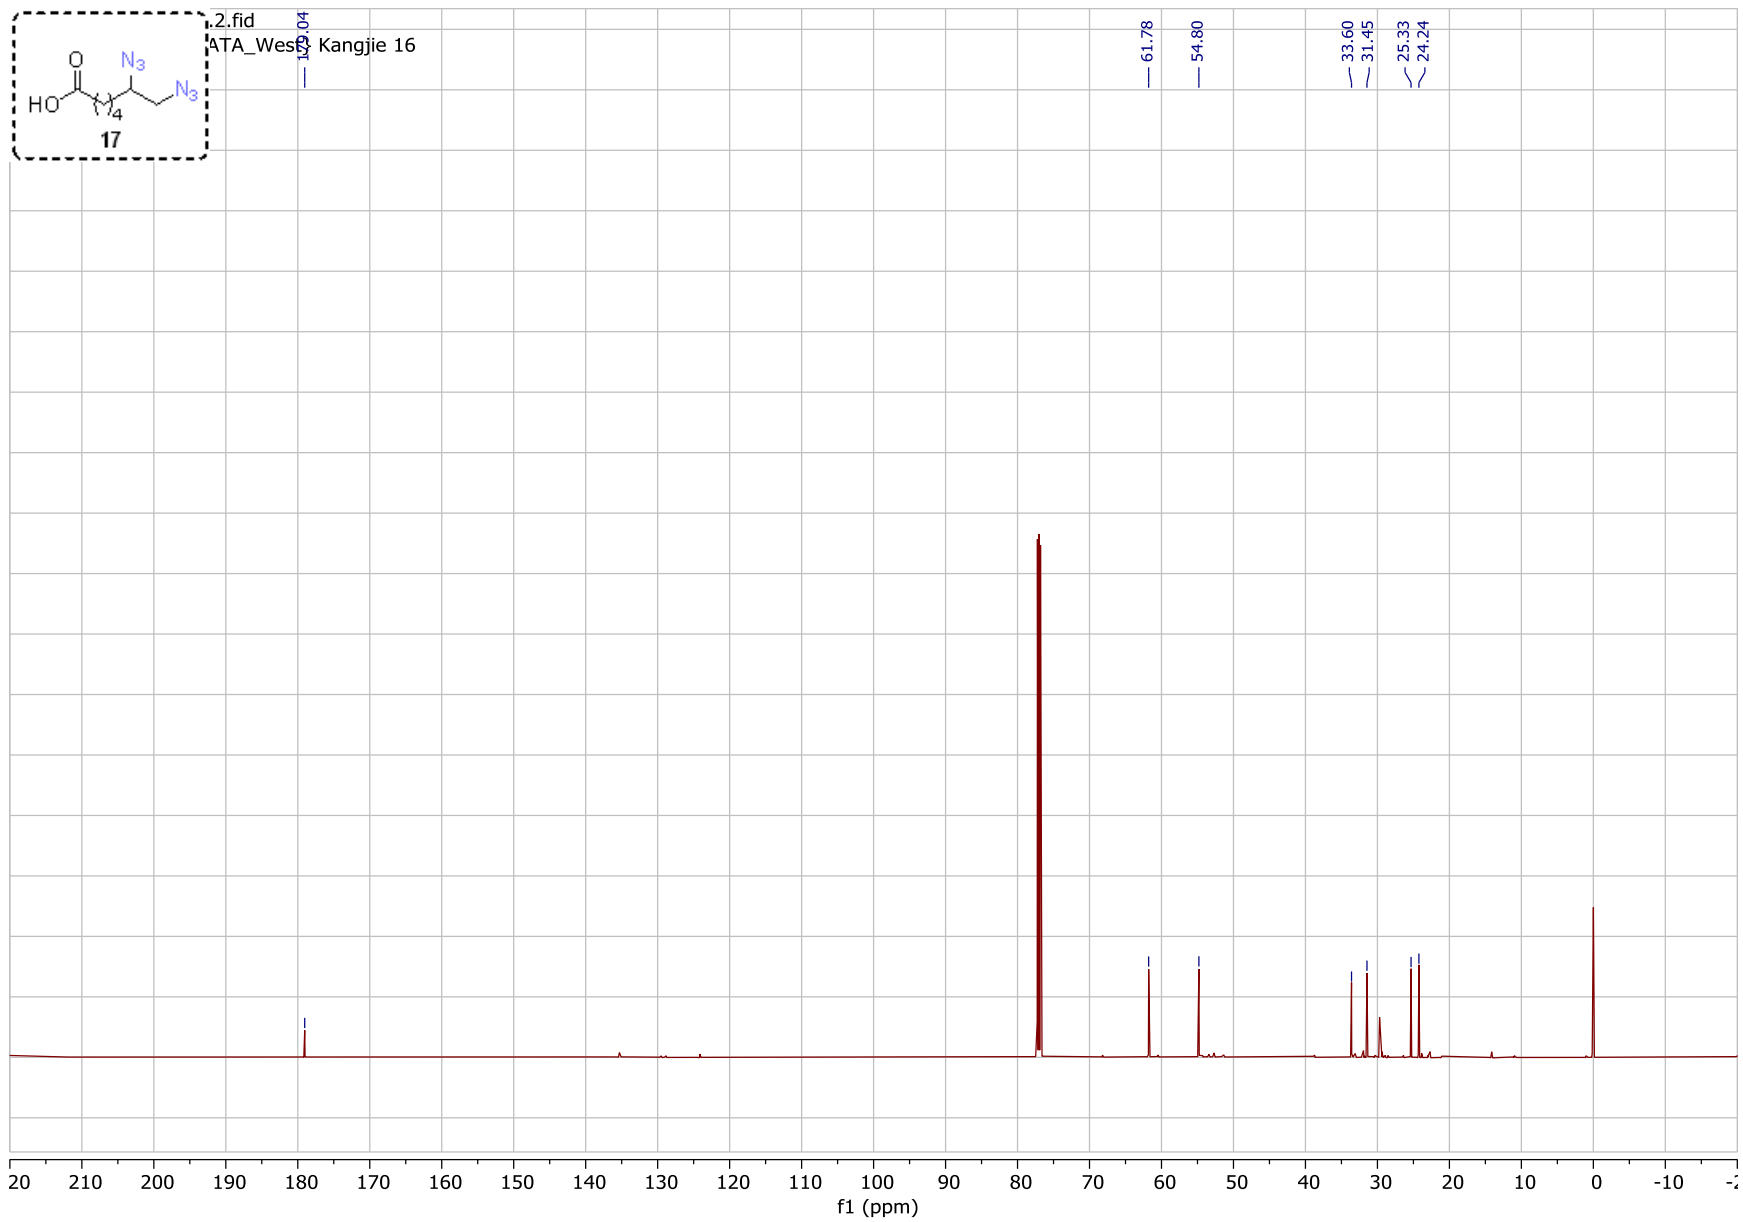

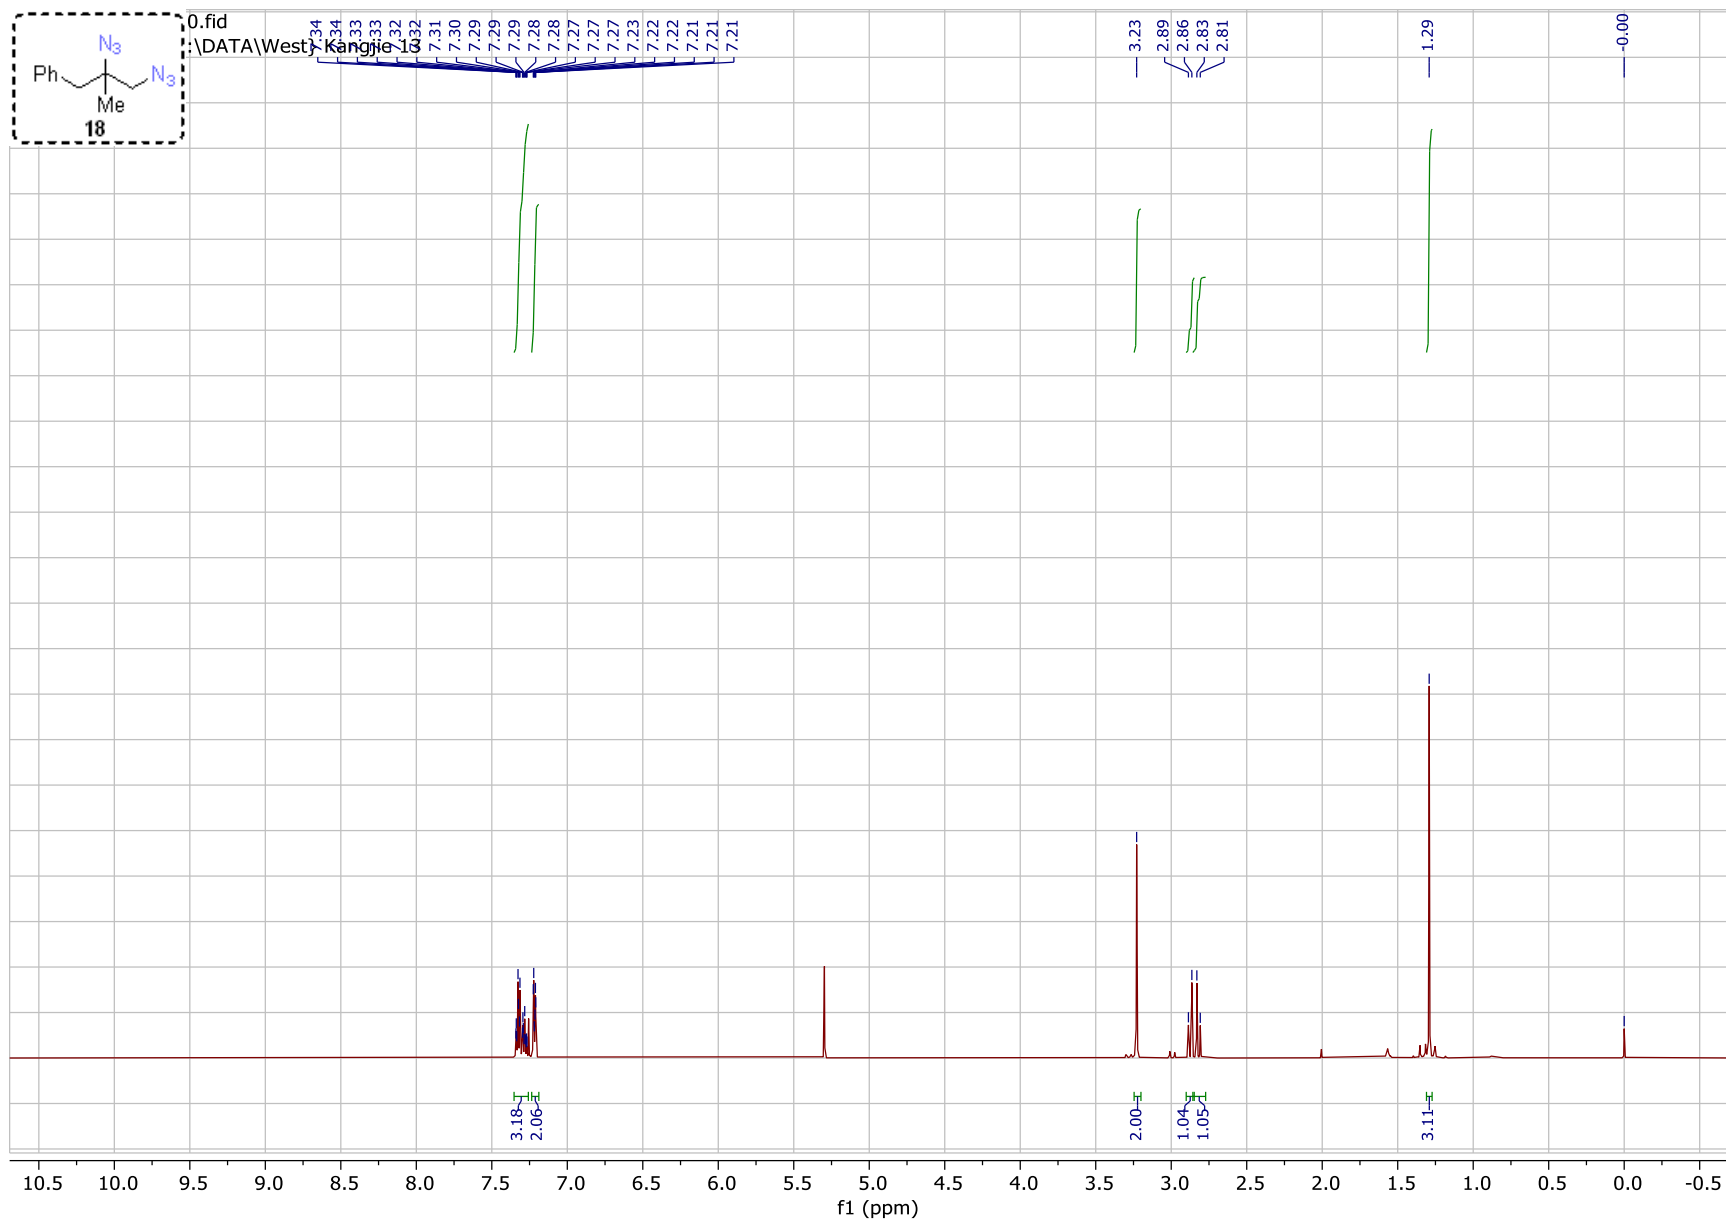

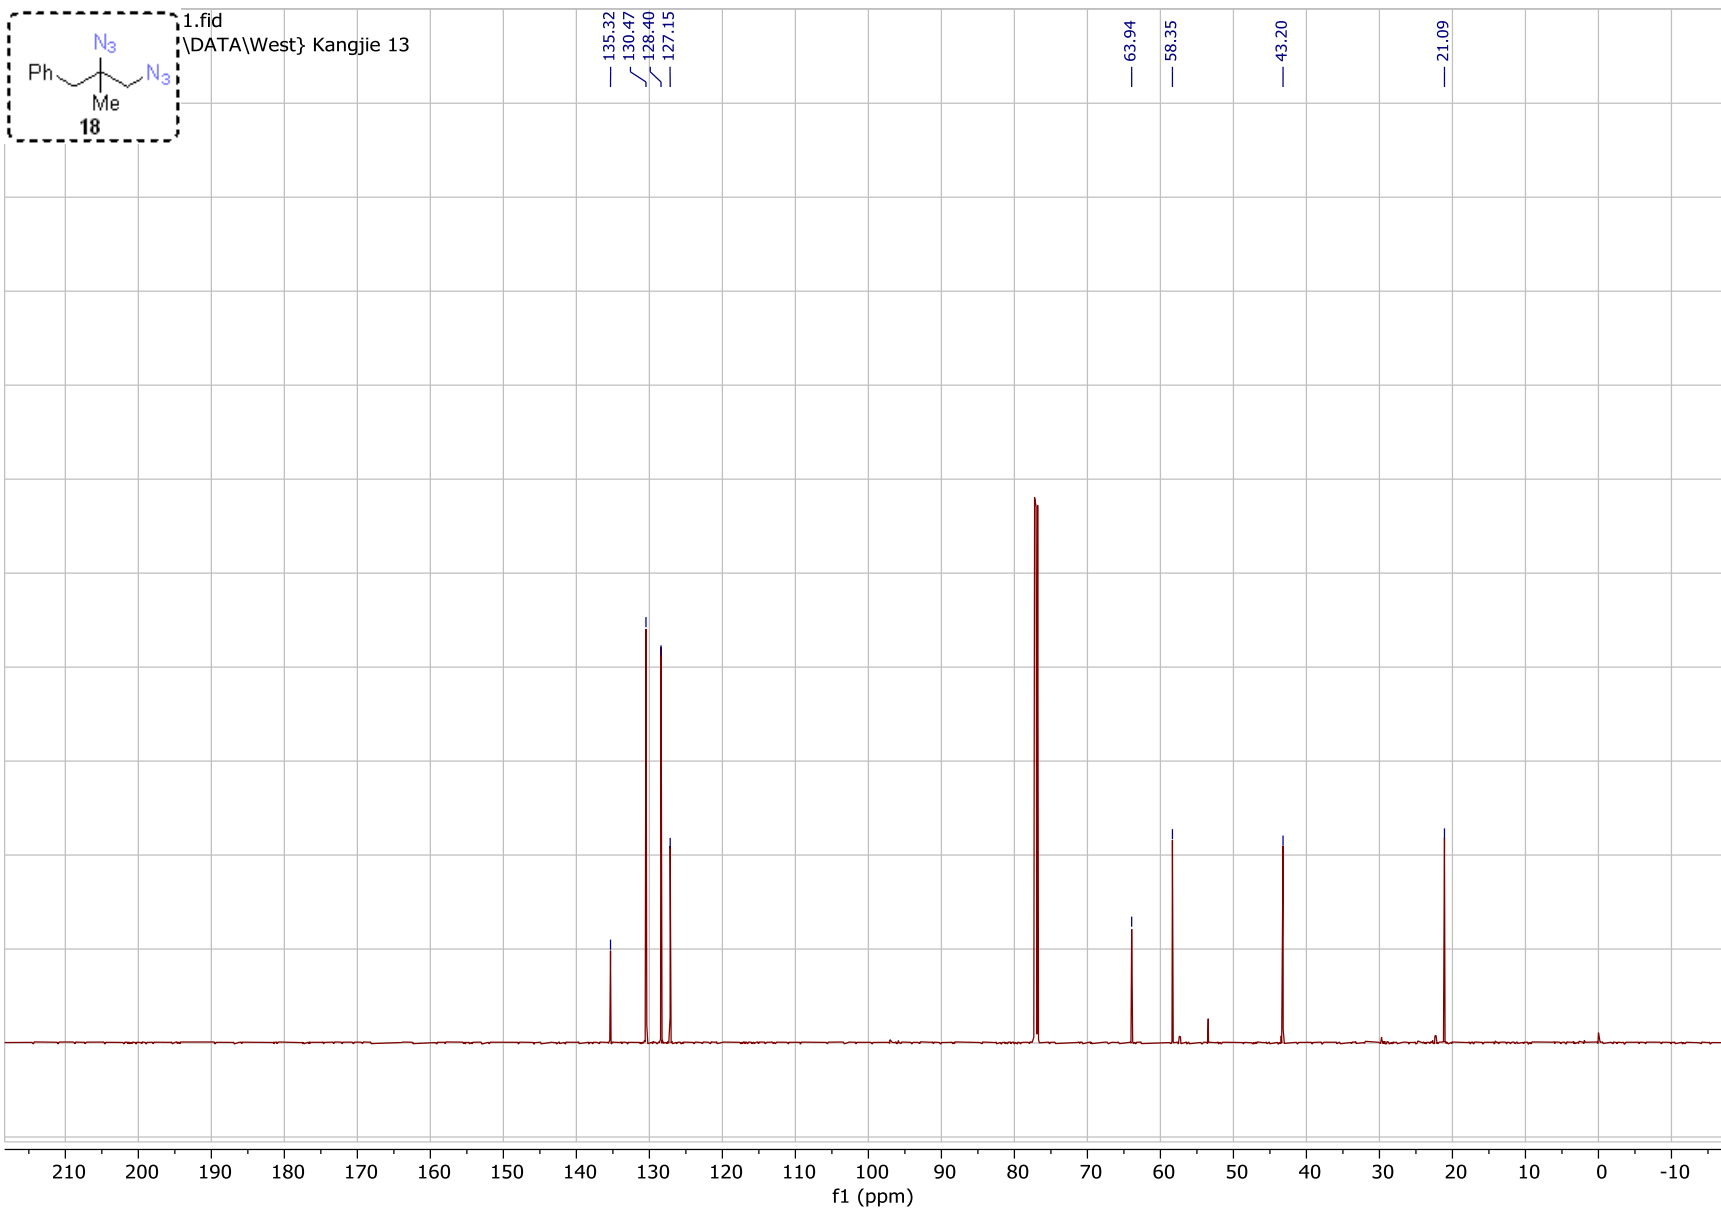

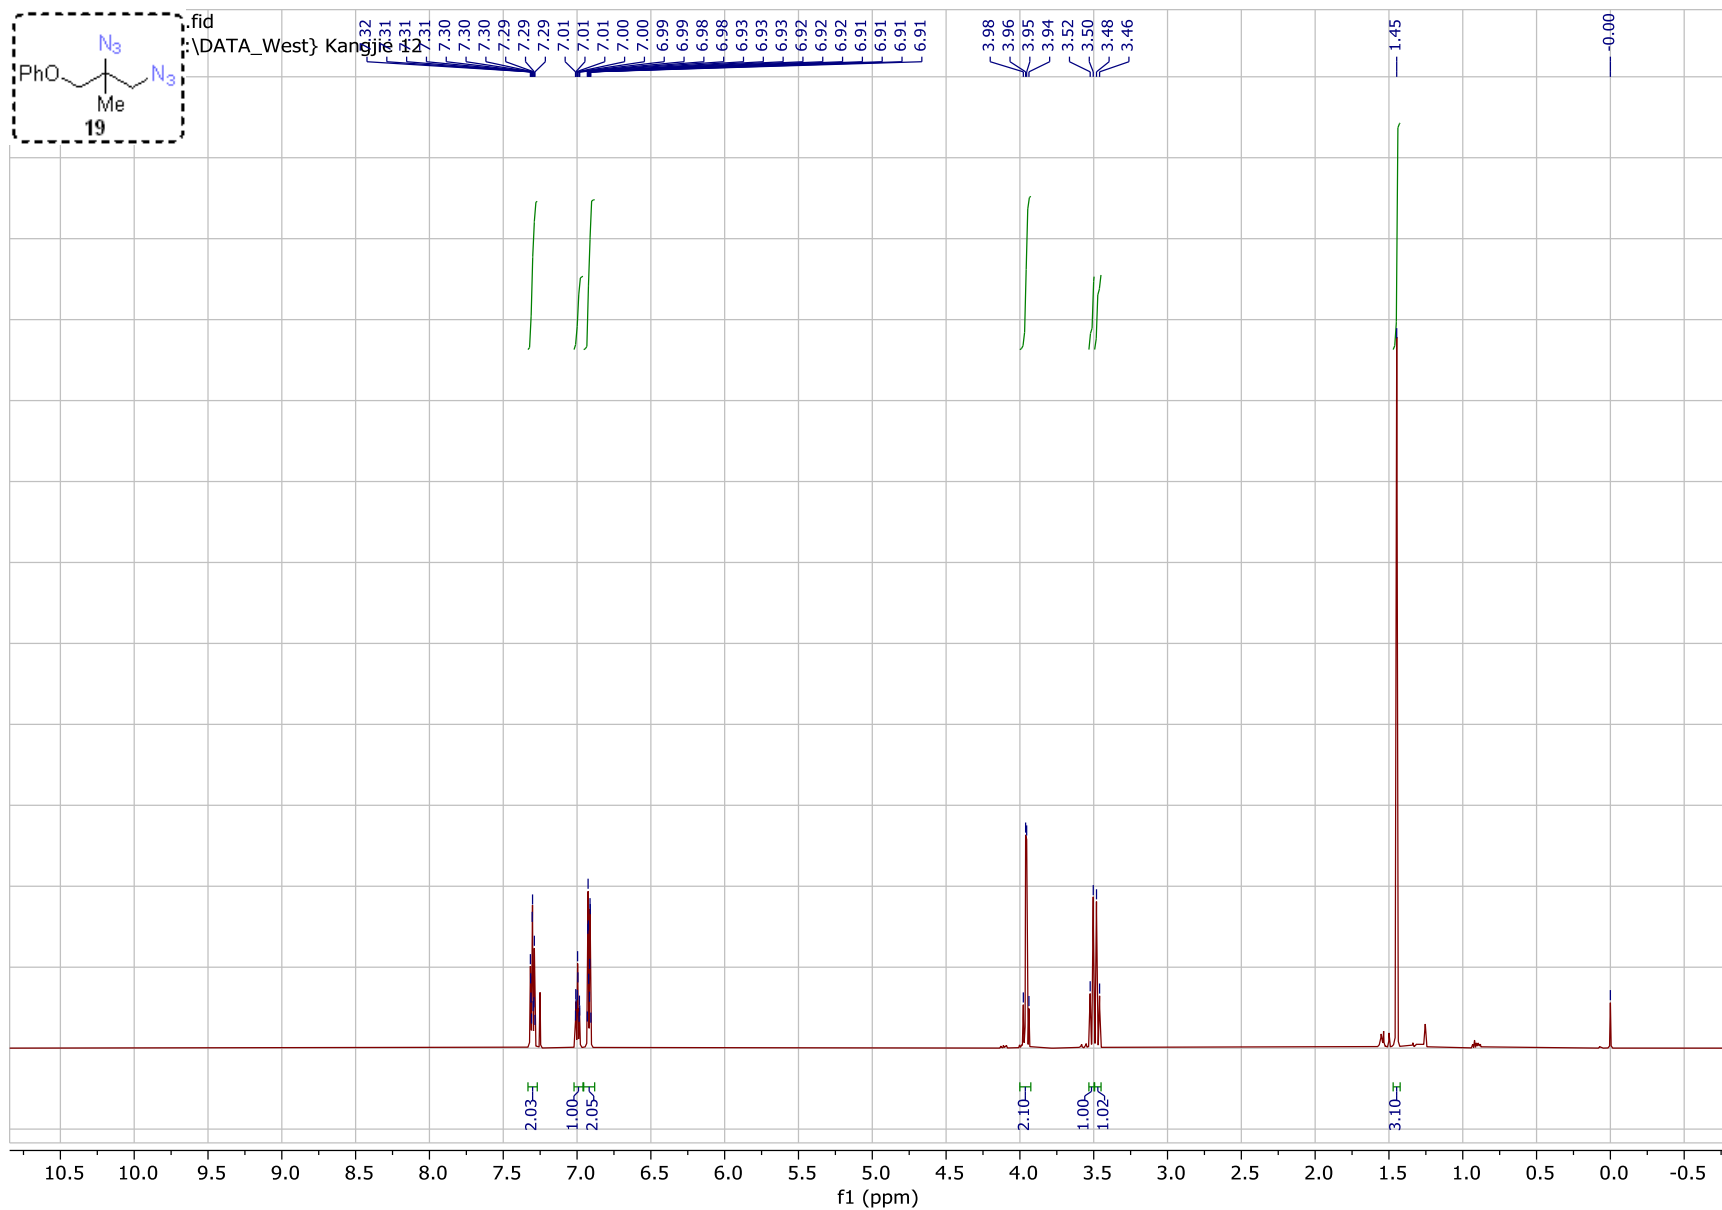

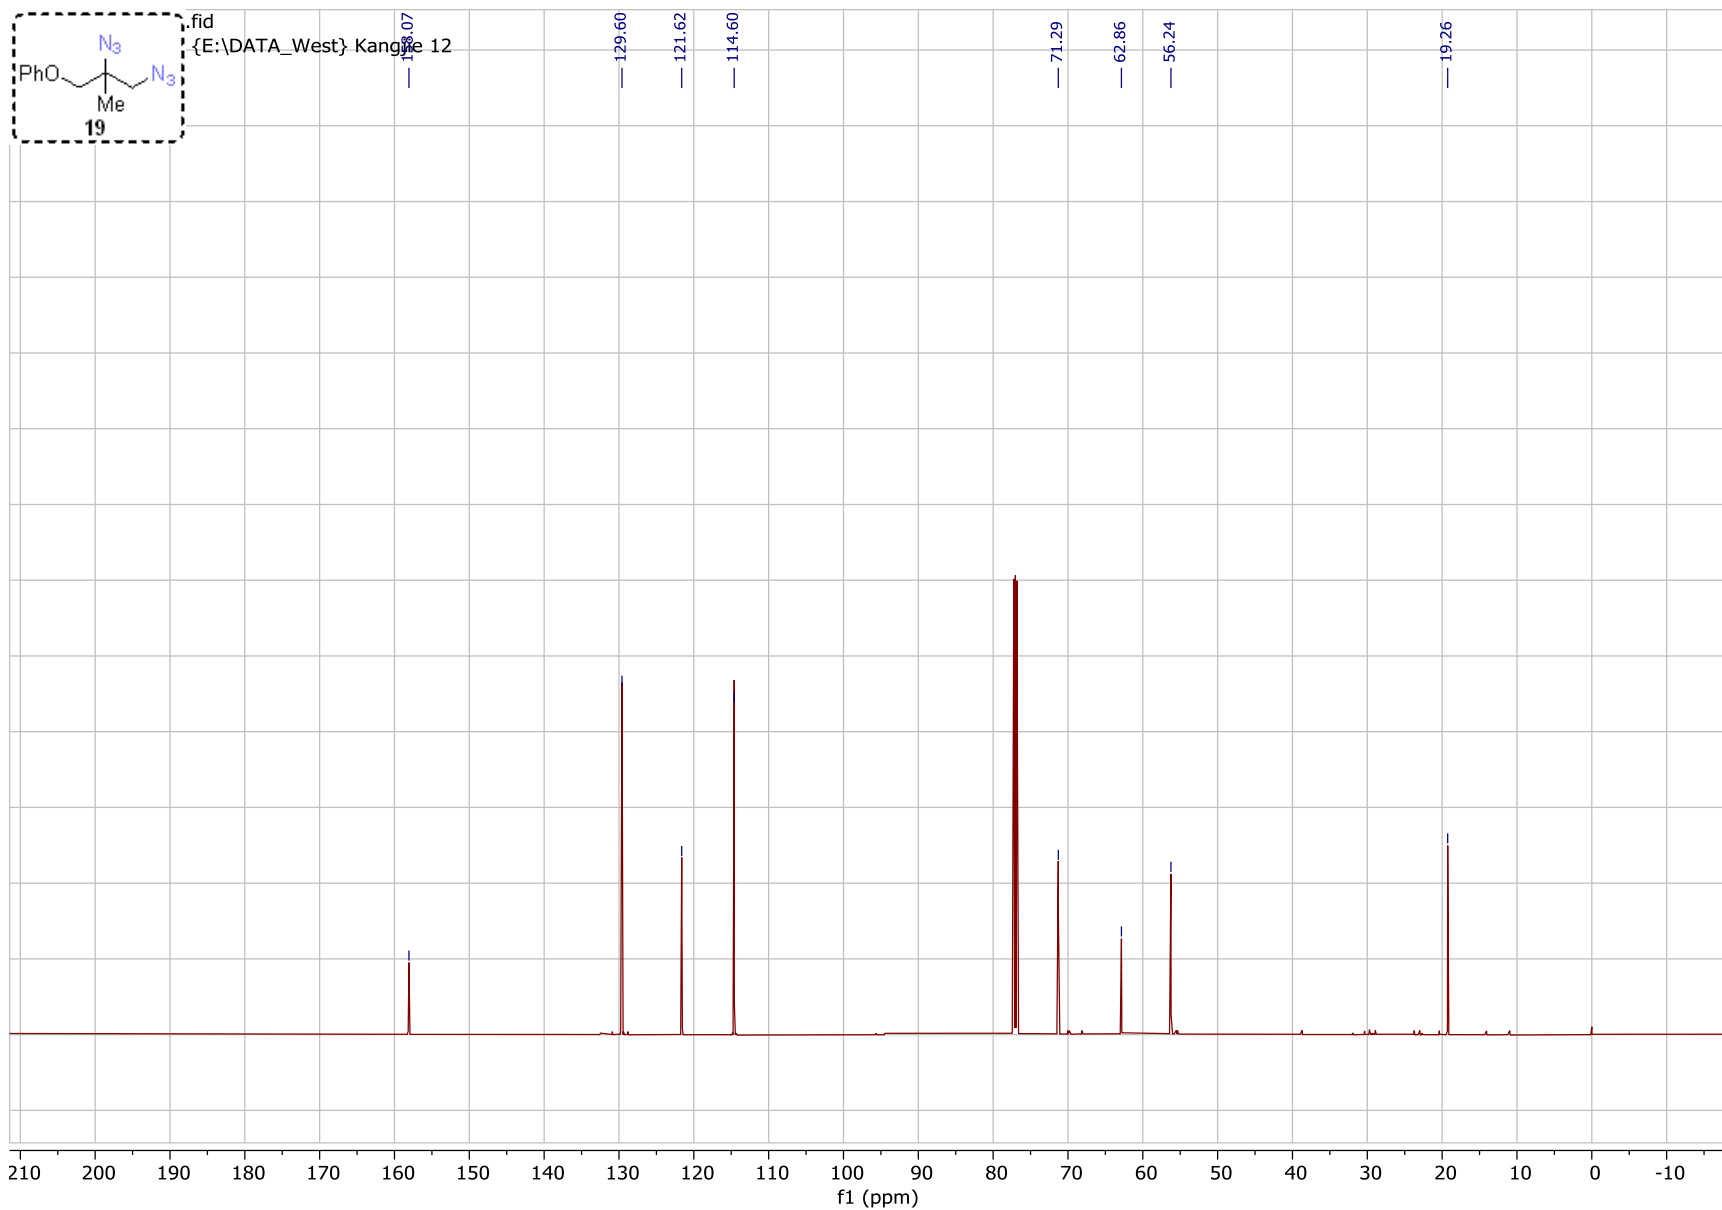

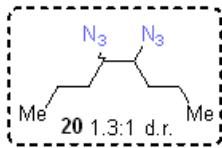

FA West Kangjie 9  
3.37, 3.36, 3.36, 3.35, 3.34, 3.34, 3.30, 3.29, 3.28, 3.28, 3.28, 3.28, 3.27, 3.26, 1.66, 1.66, 1.66, 1.65, 1.65, 1.64, 1.64, 1.62, 1.62, 1.61, 1.61, 1.60, 1.60, 1.60, 1.60, 1.60, 1.59, 1.59, 1.58, 1.58, 1.57, 1.57, 1.55, 1.54, 1.54, 1.54, 1.53, 1.53, 1.52, 1.52, 1.51, 1.51, 1.51, 1.51, 1.50, 1.50, 1.49, 1.49, 1.46, 1.46, 1.45, 1.45, 1.44, 1.44, 1.43, 1.43, 1.42, 1.42, 1.42, 1.41, 1.40, 1.40, 1.39, 1.39, 1.39, 1.39, 1.38, 1.38, 1.37, 1.37, 1.07, 1.06, 0.99, 0.99, 0.98, 0.97, 0.97, 0.96, -0.00

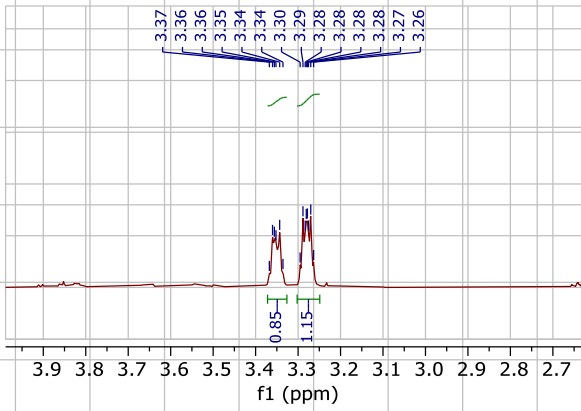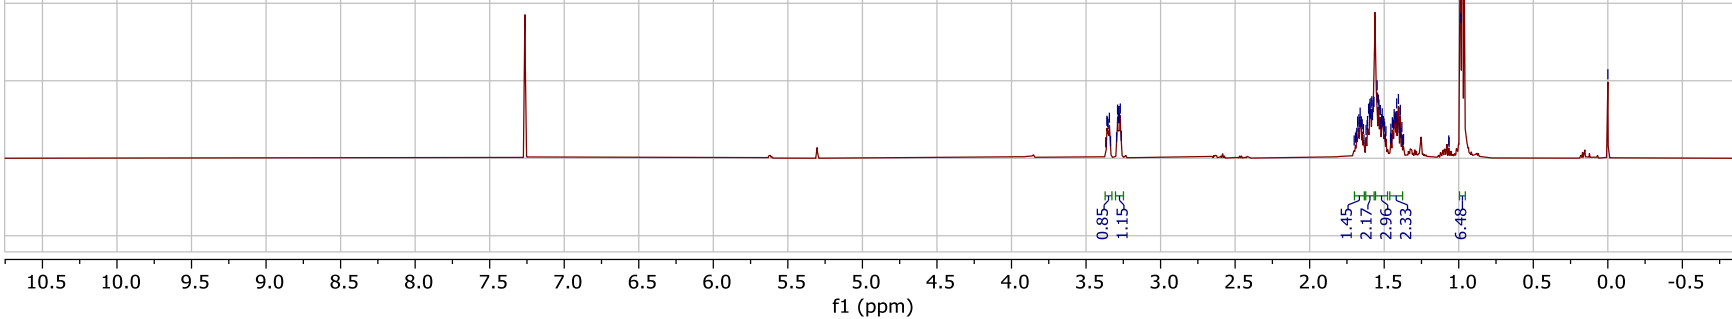



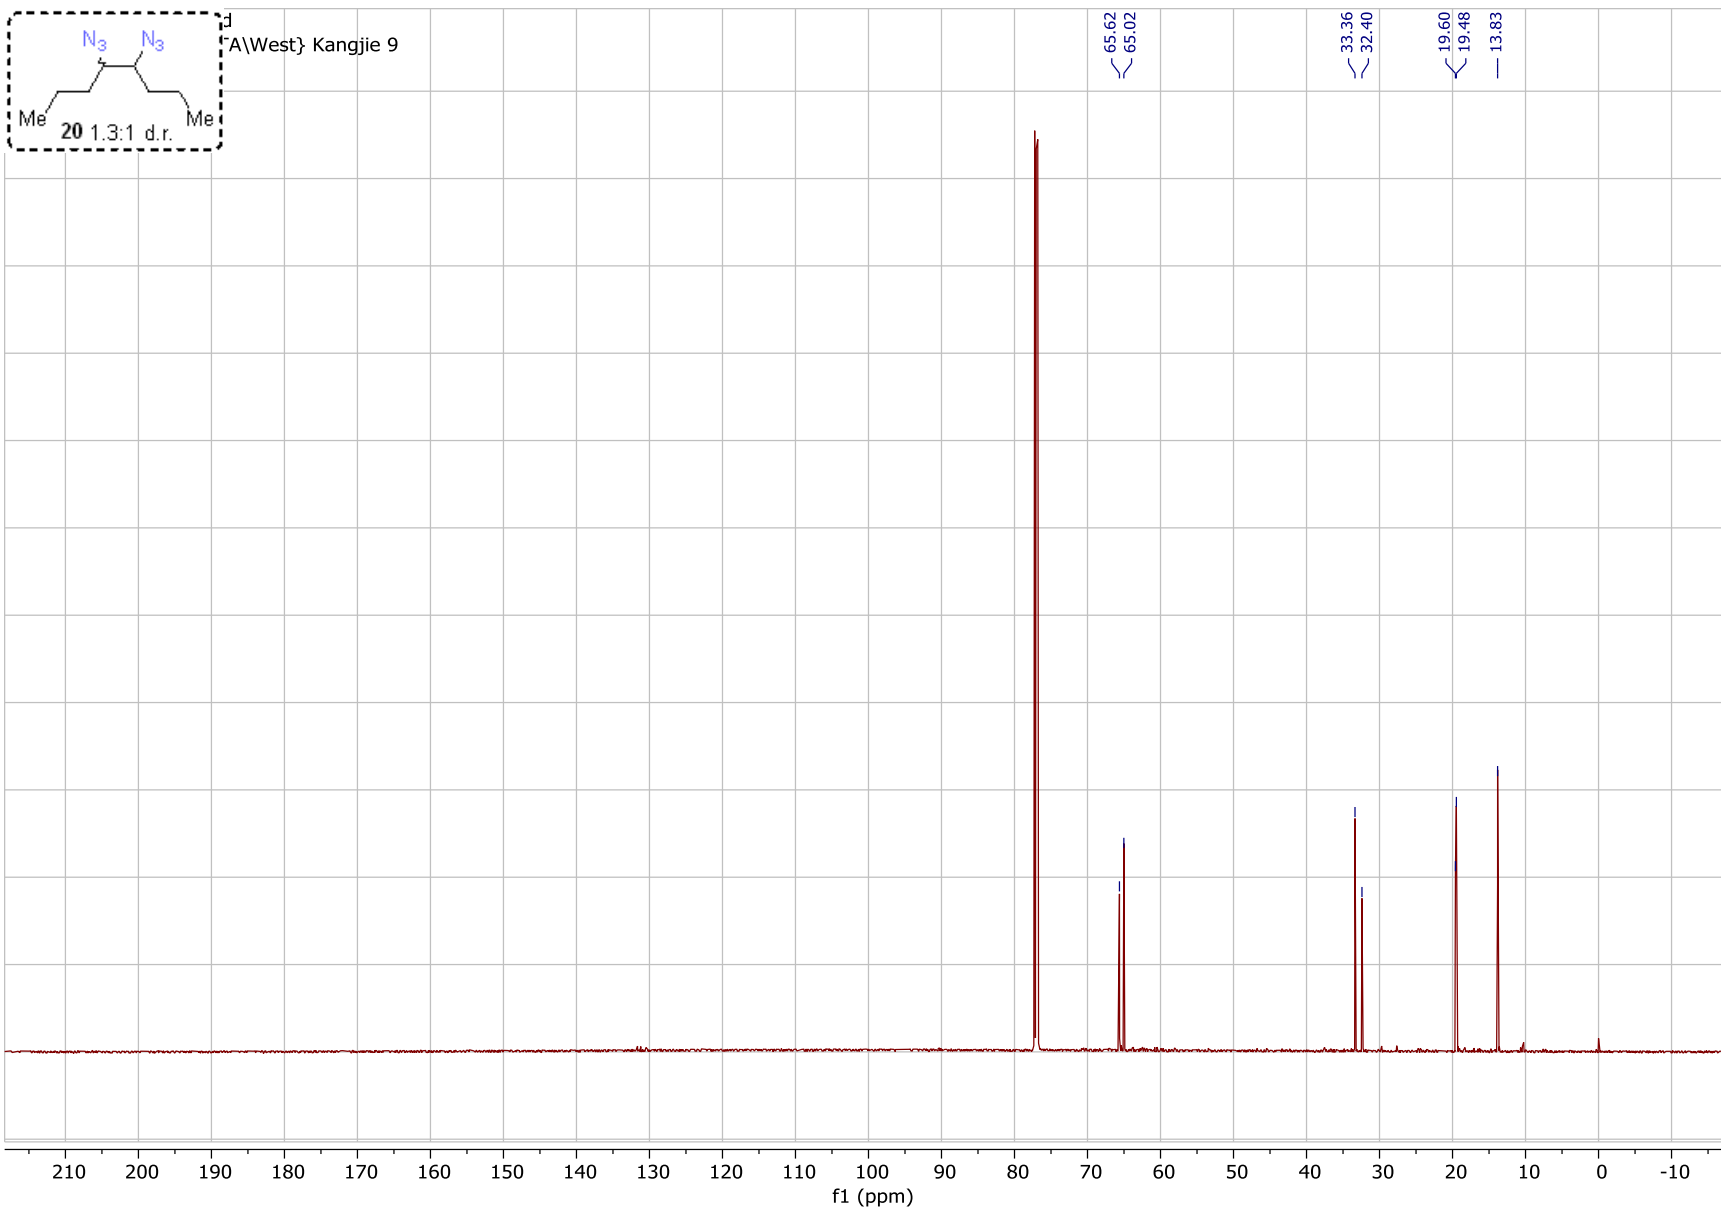

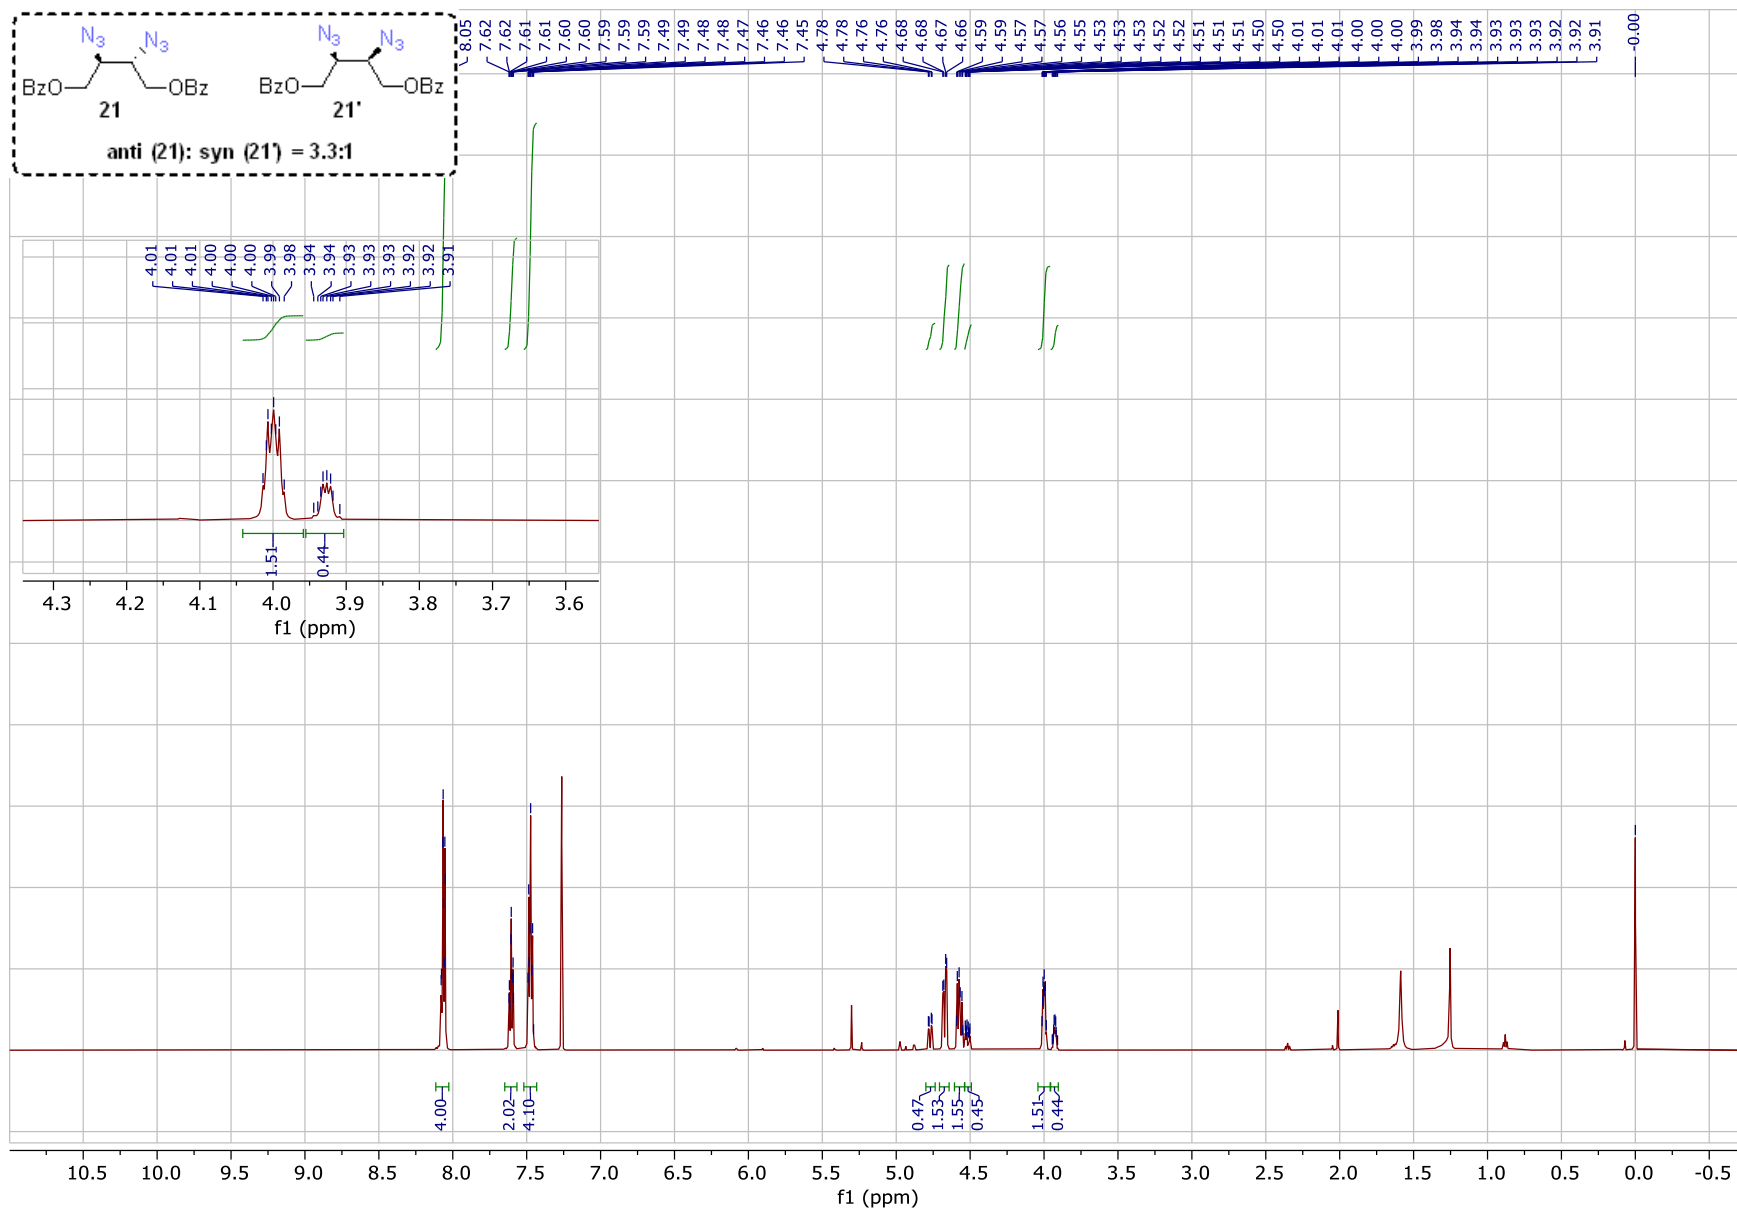

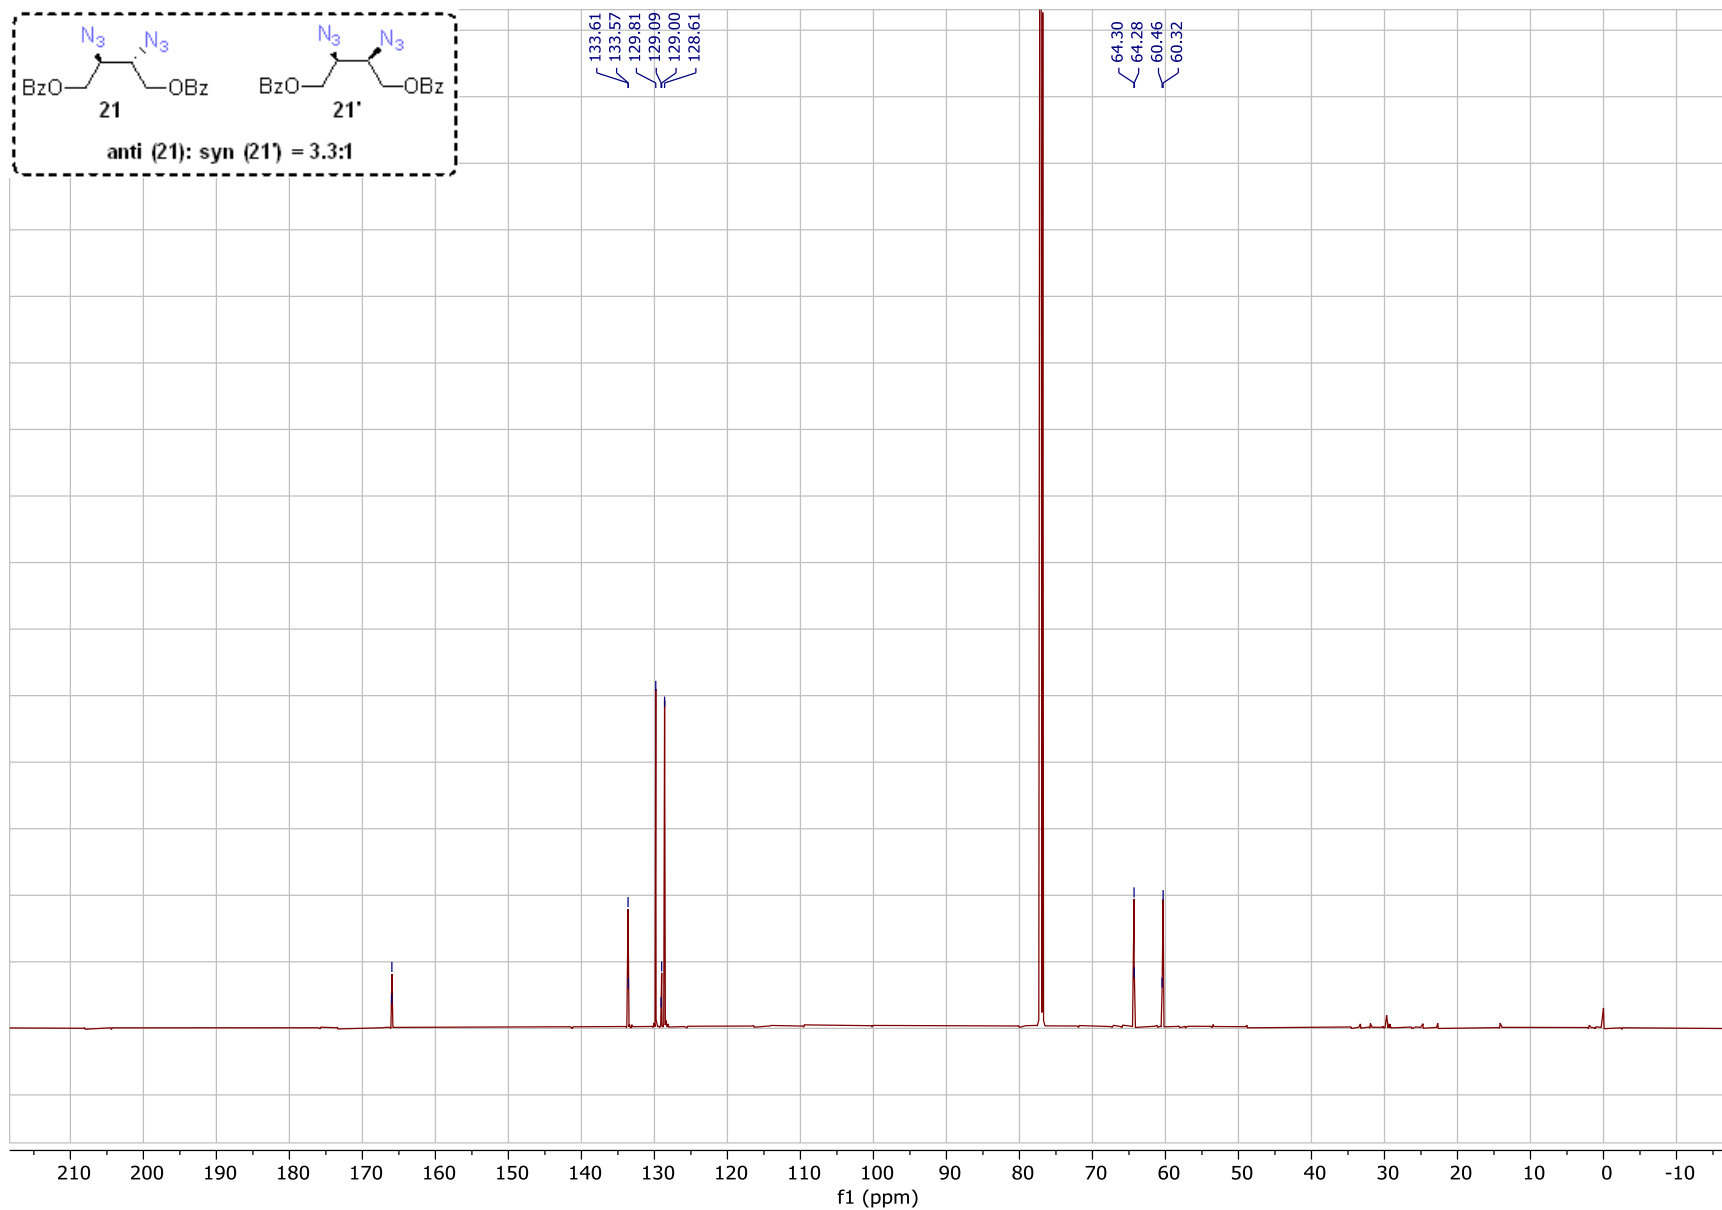

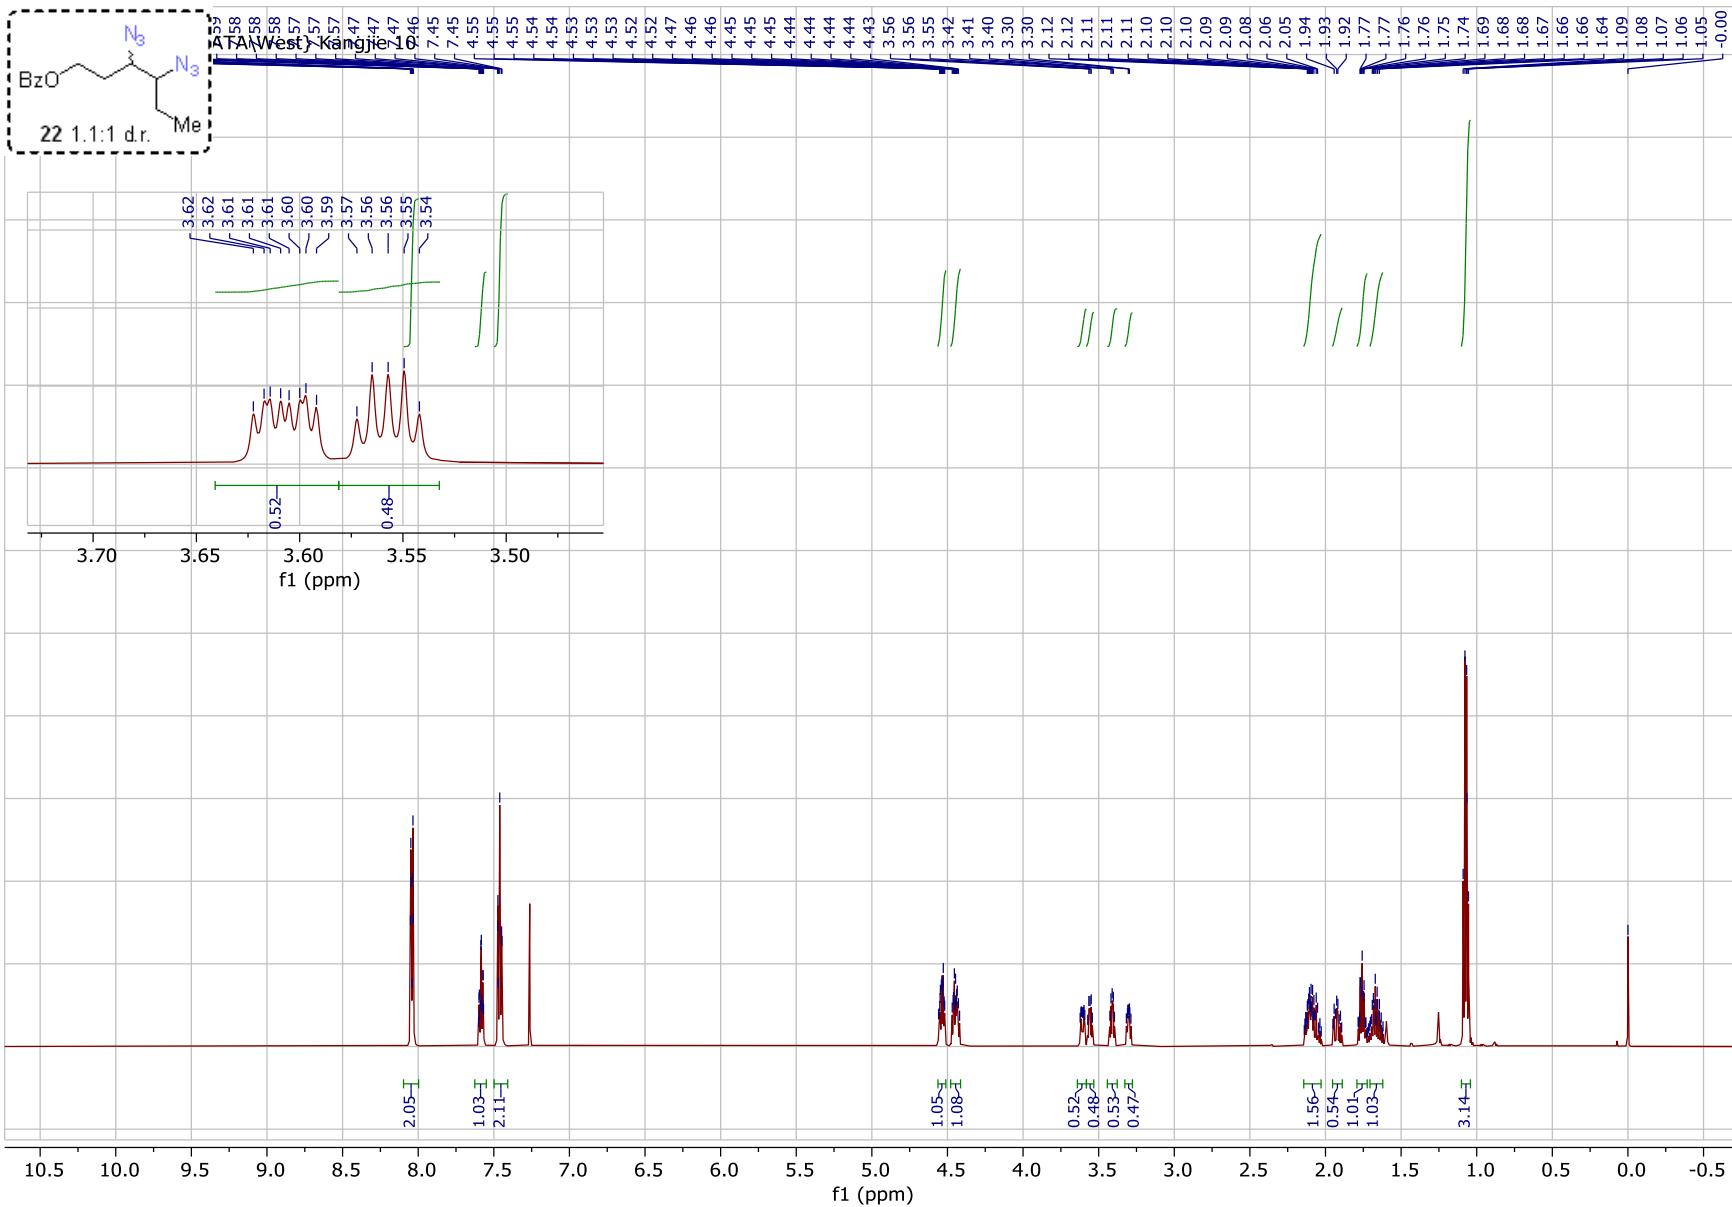

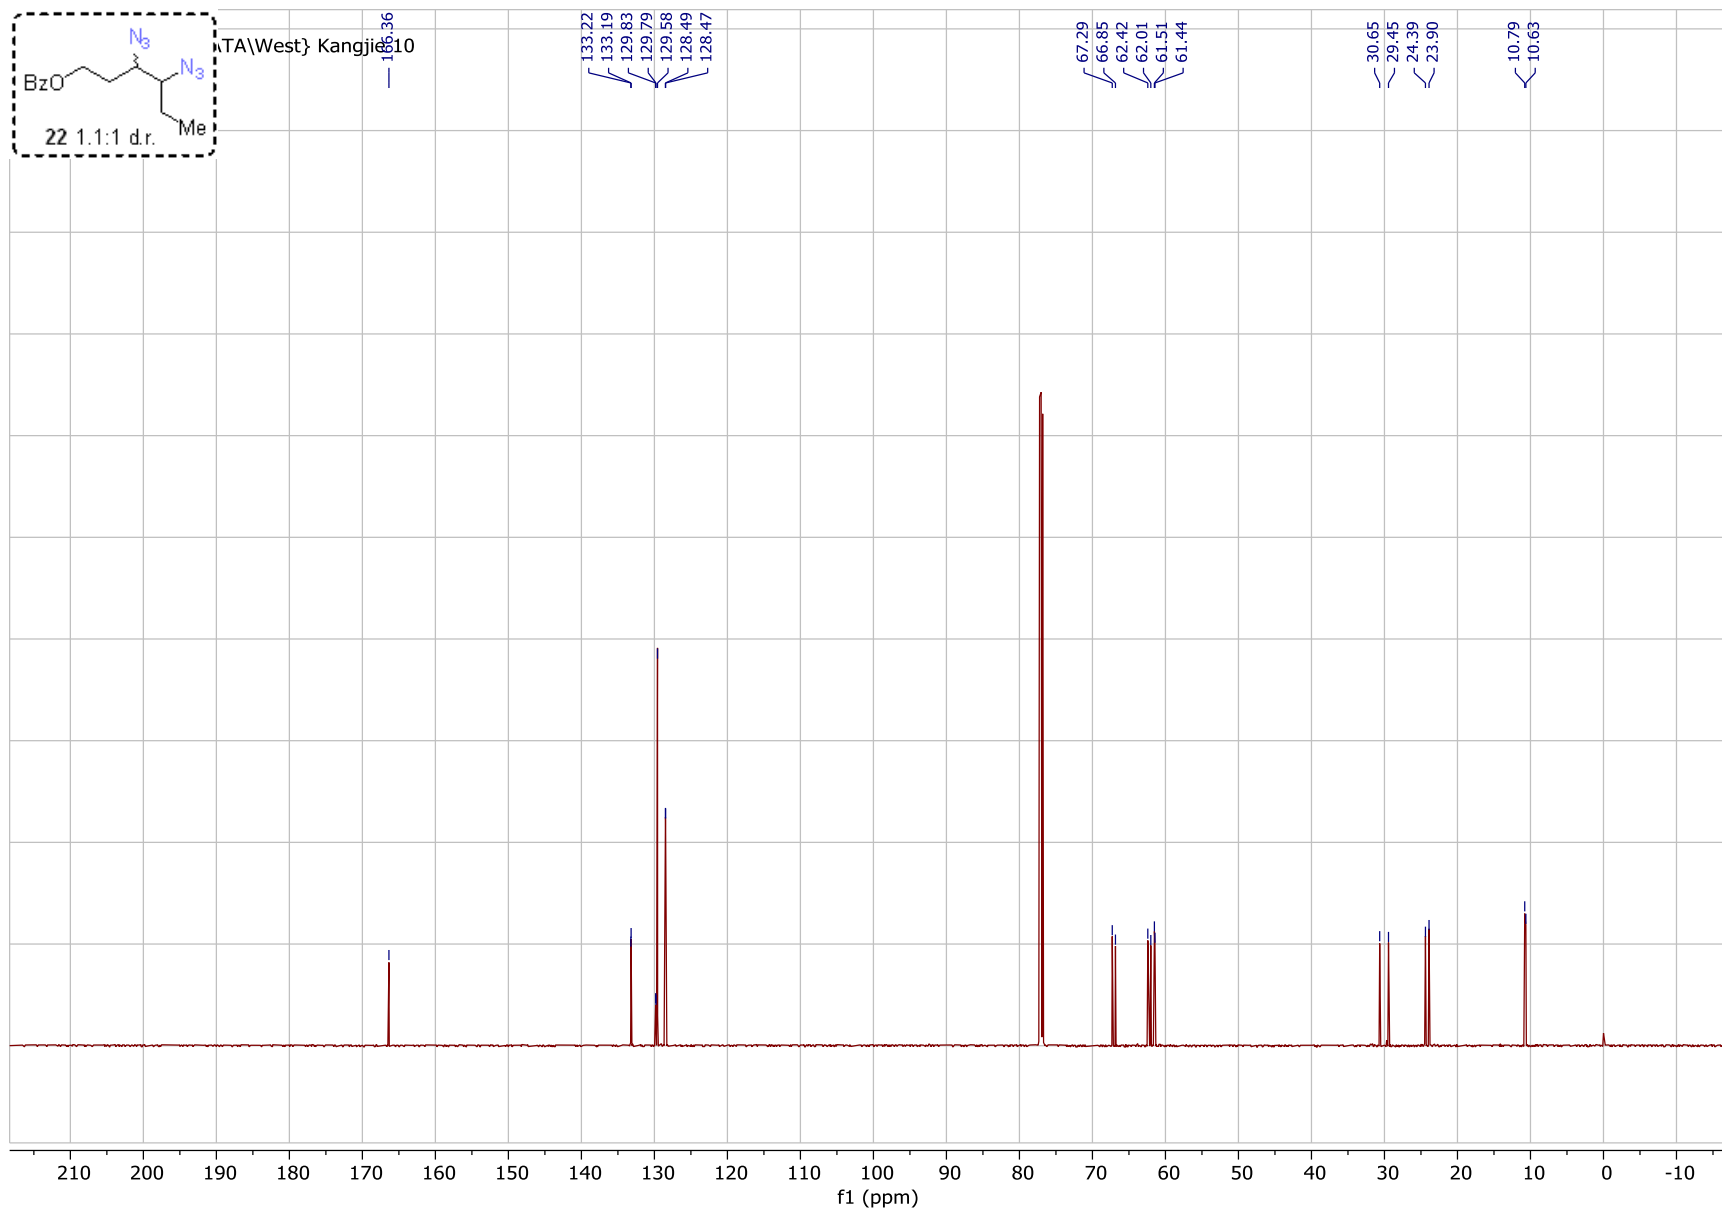

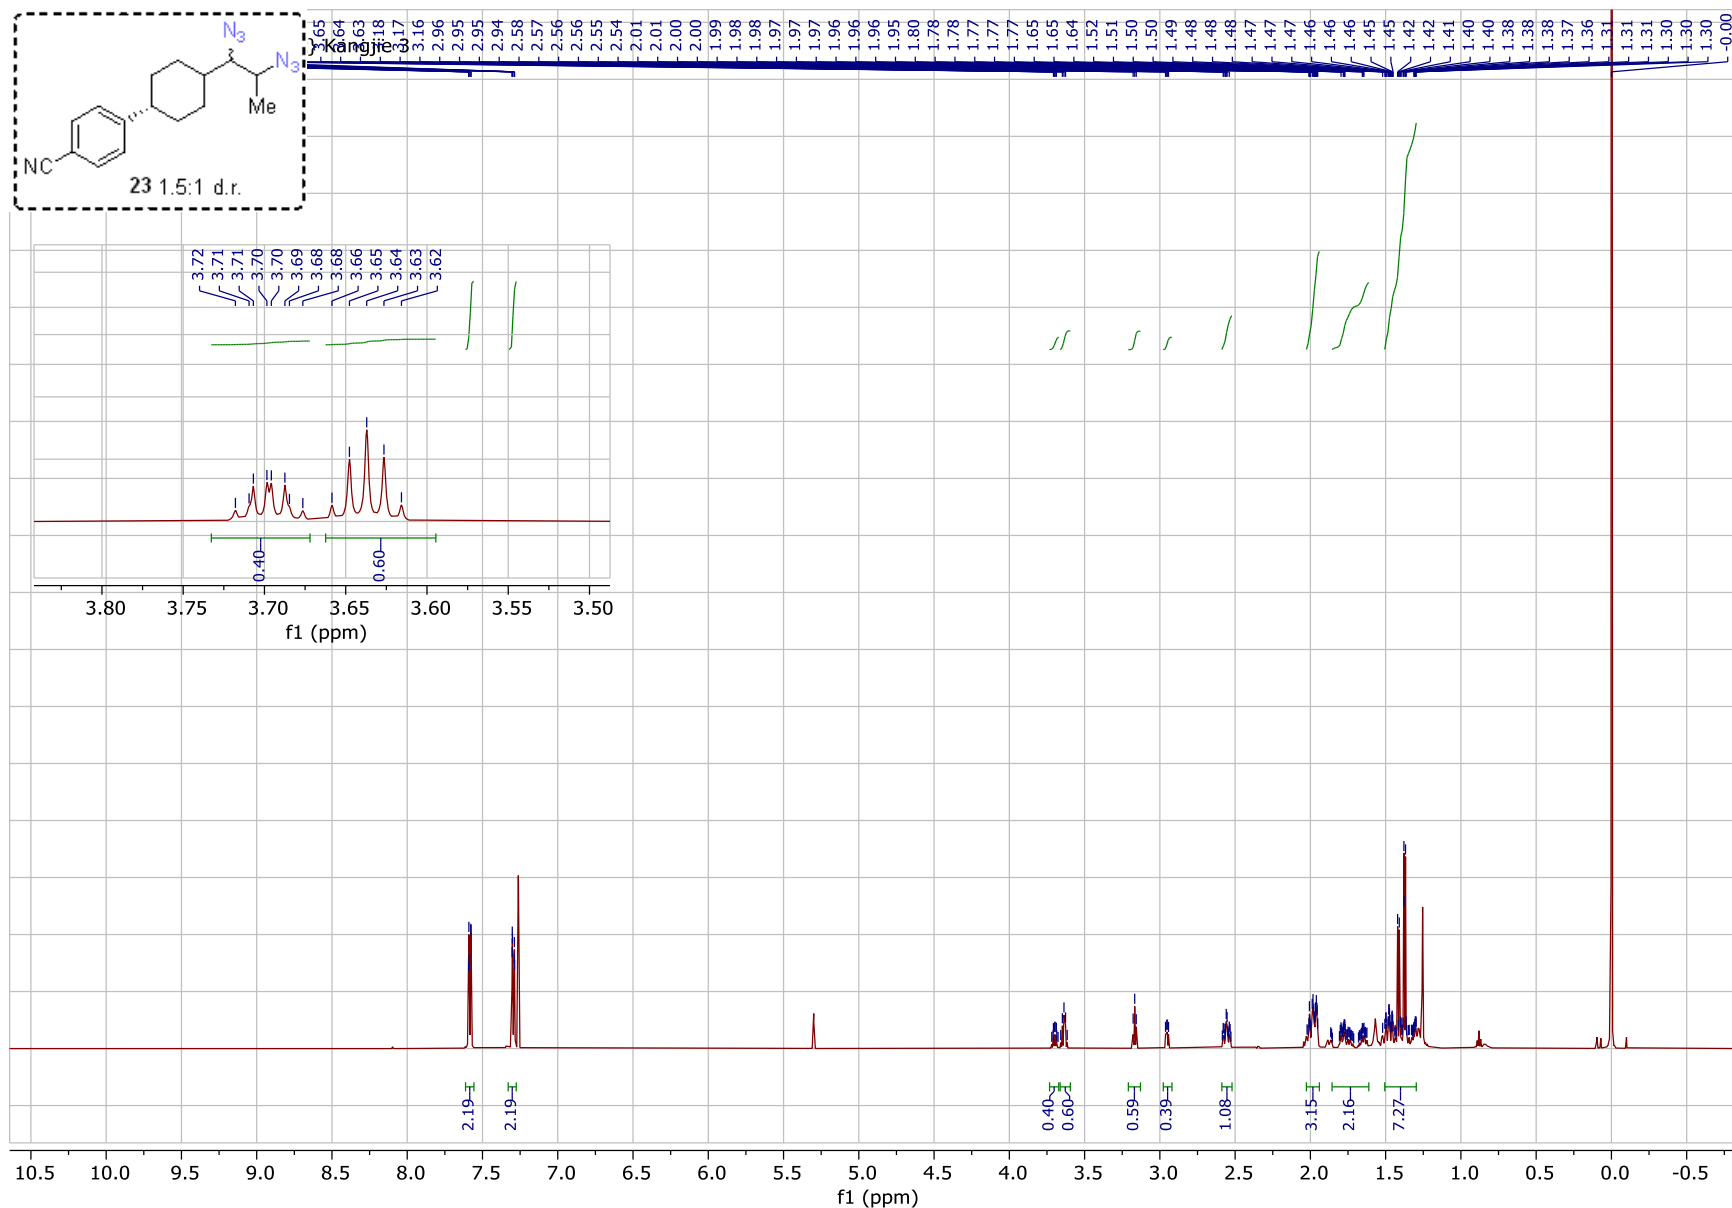

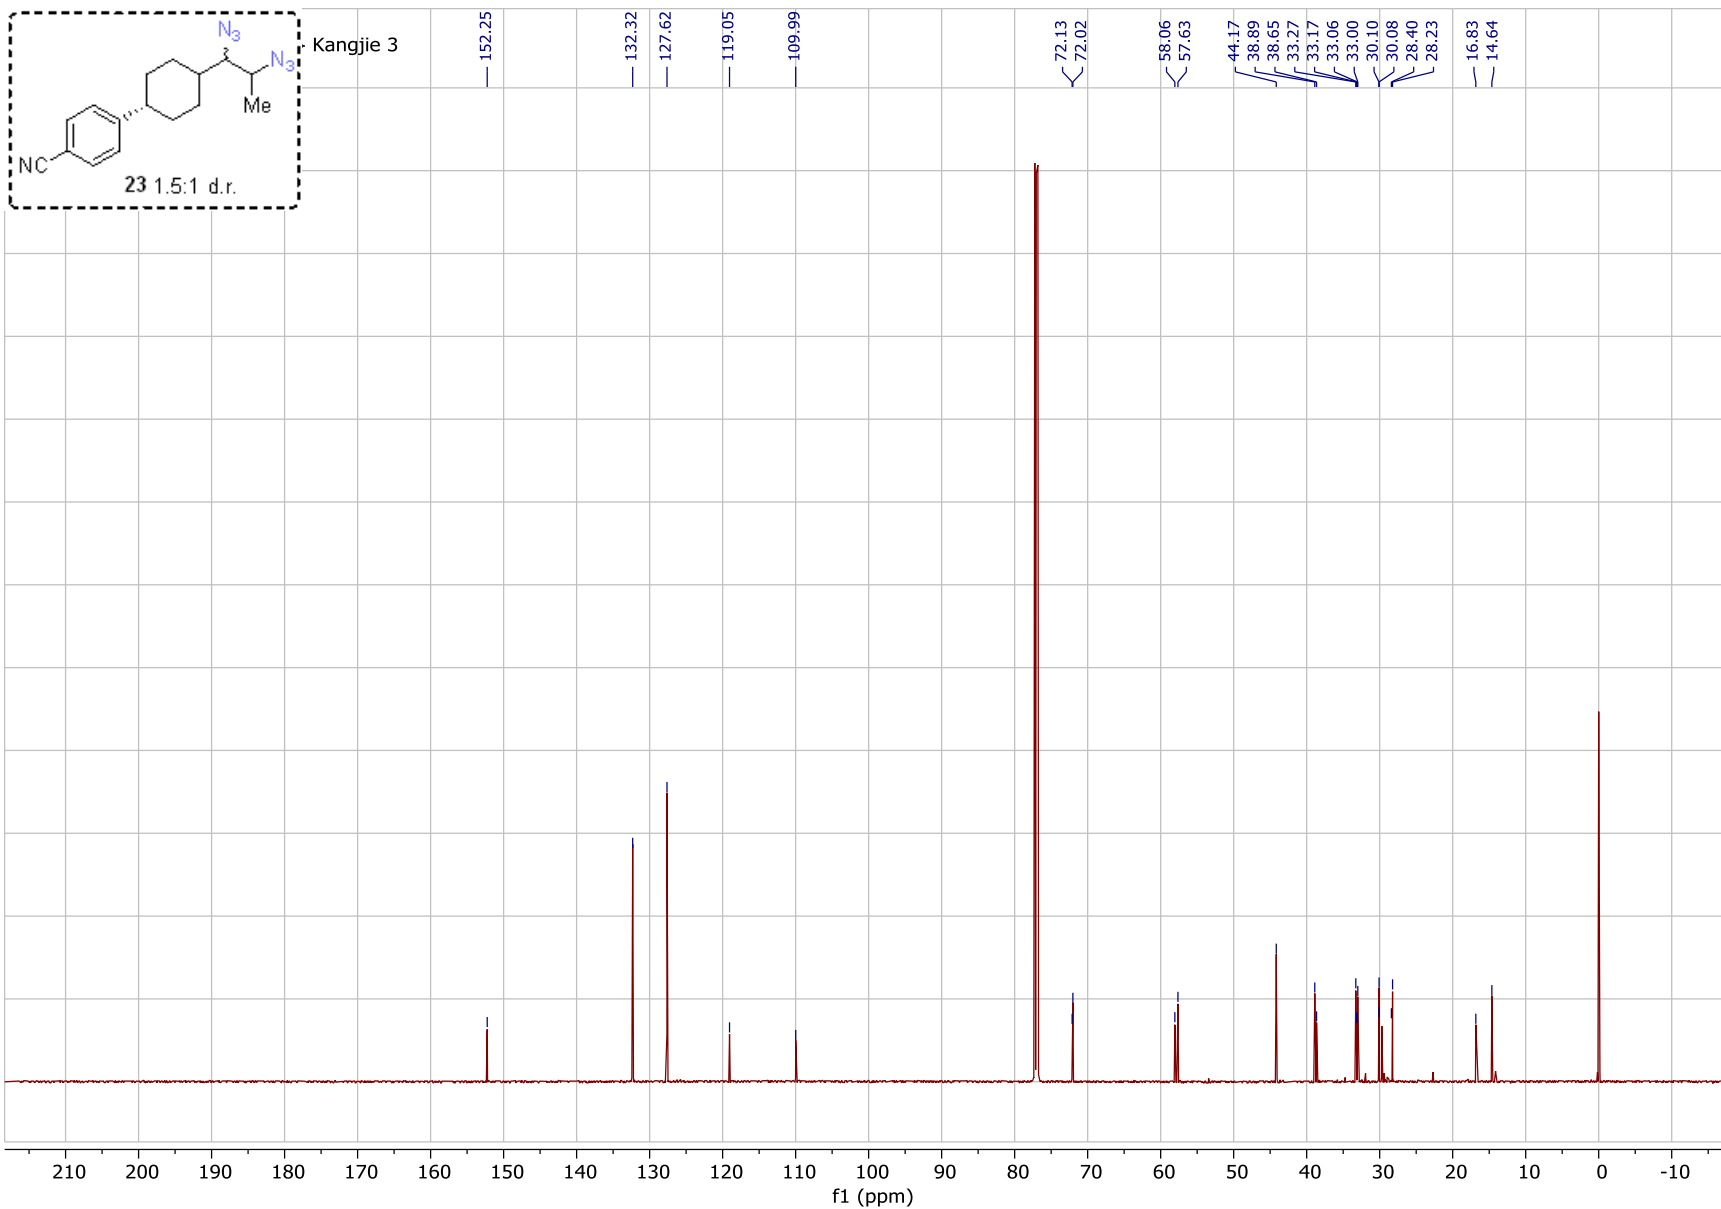

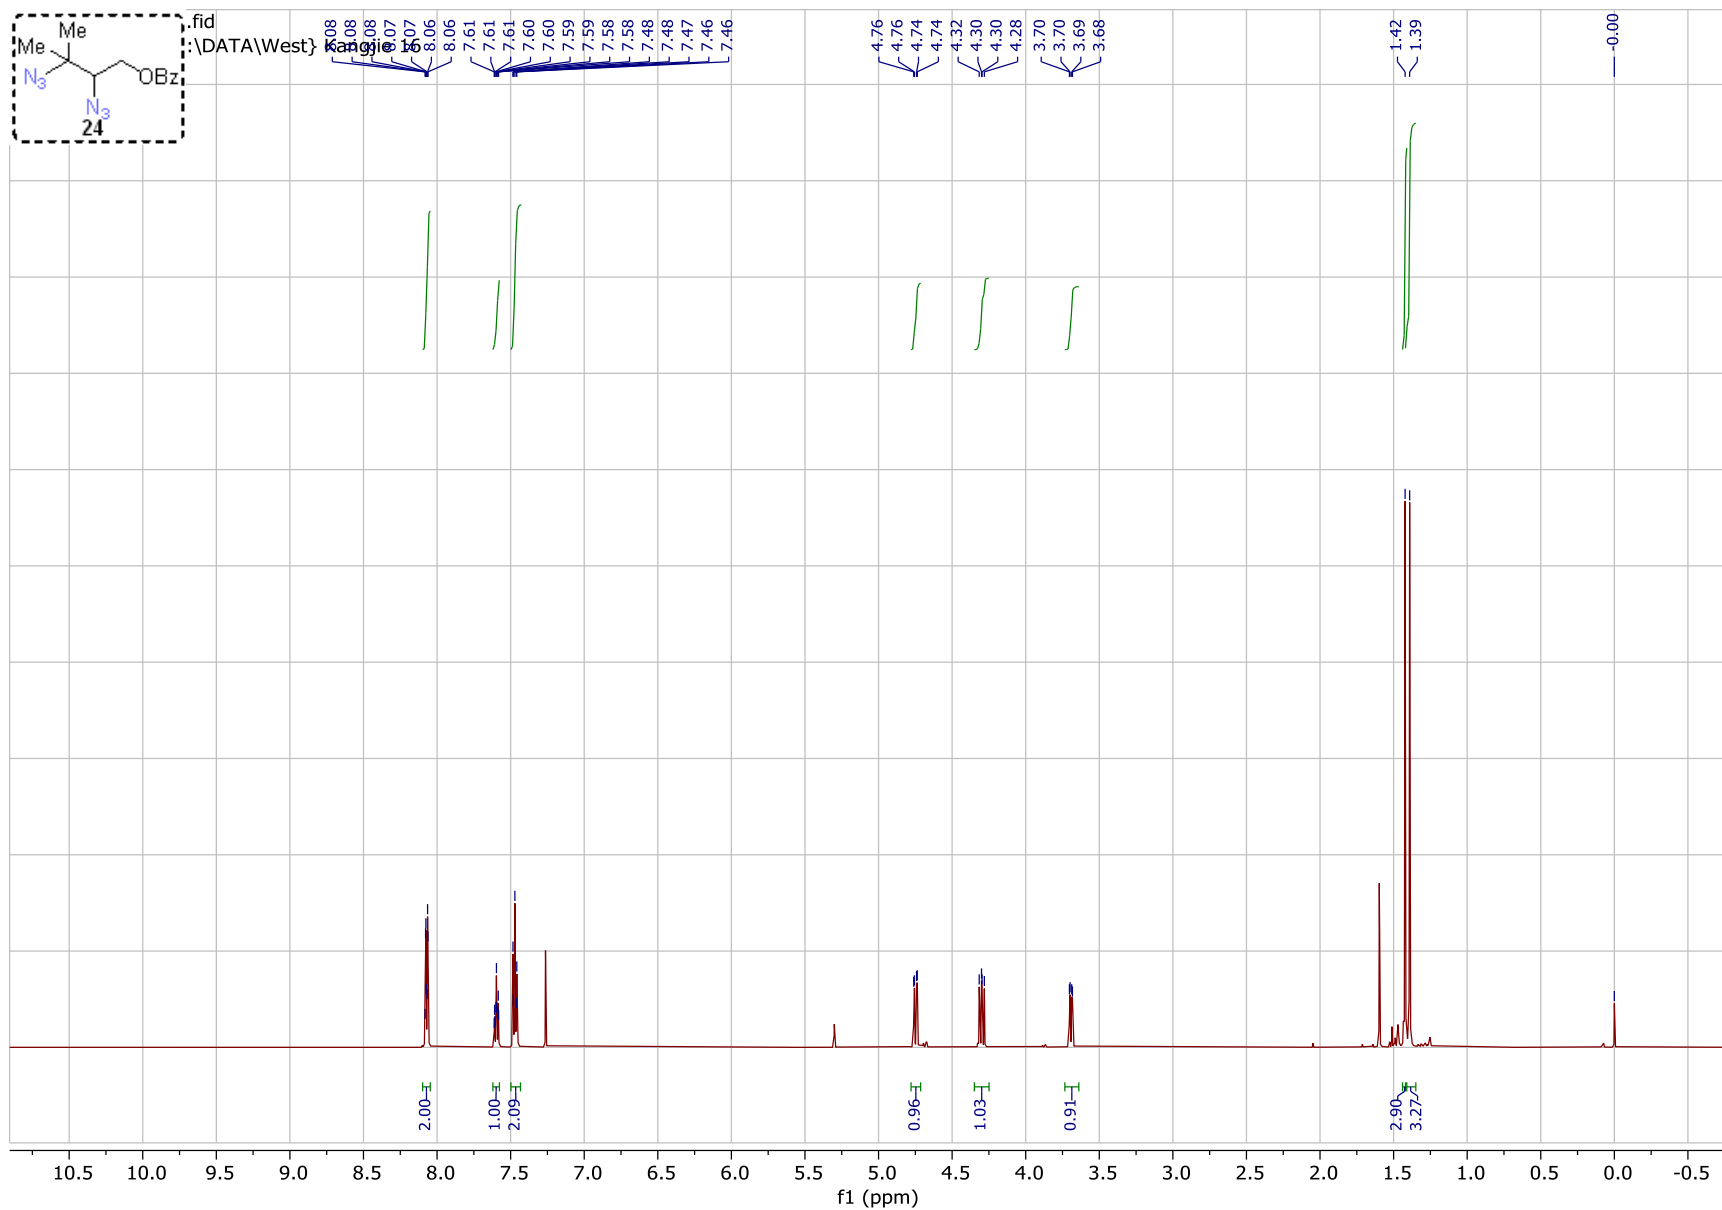



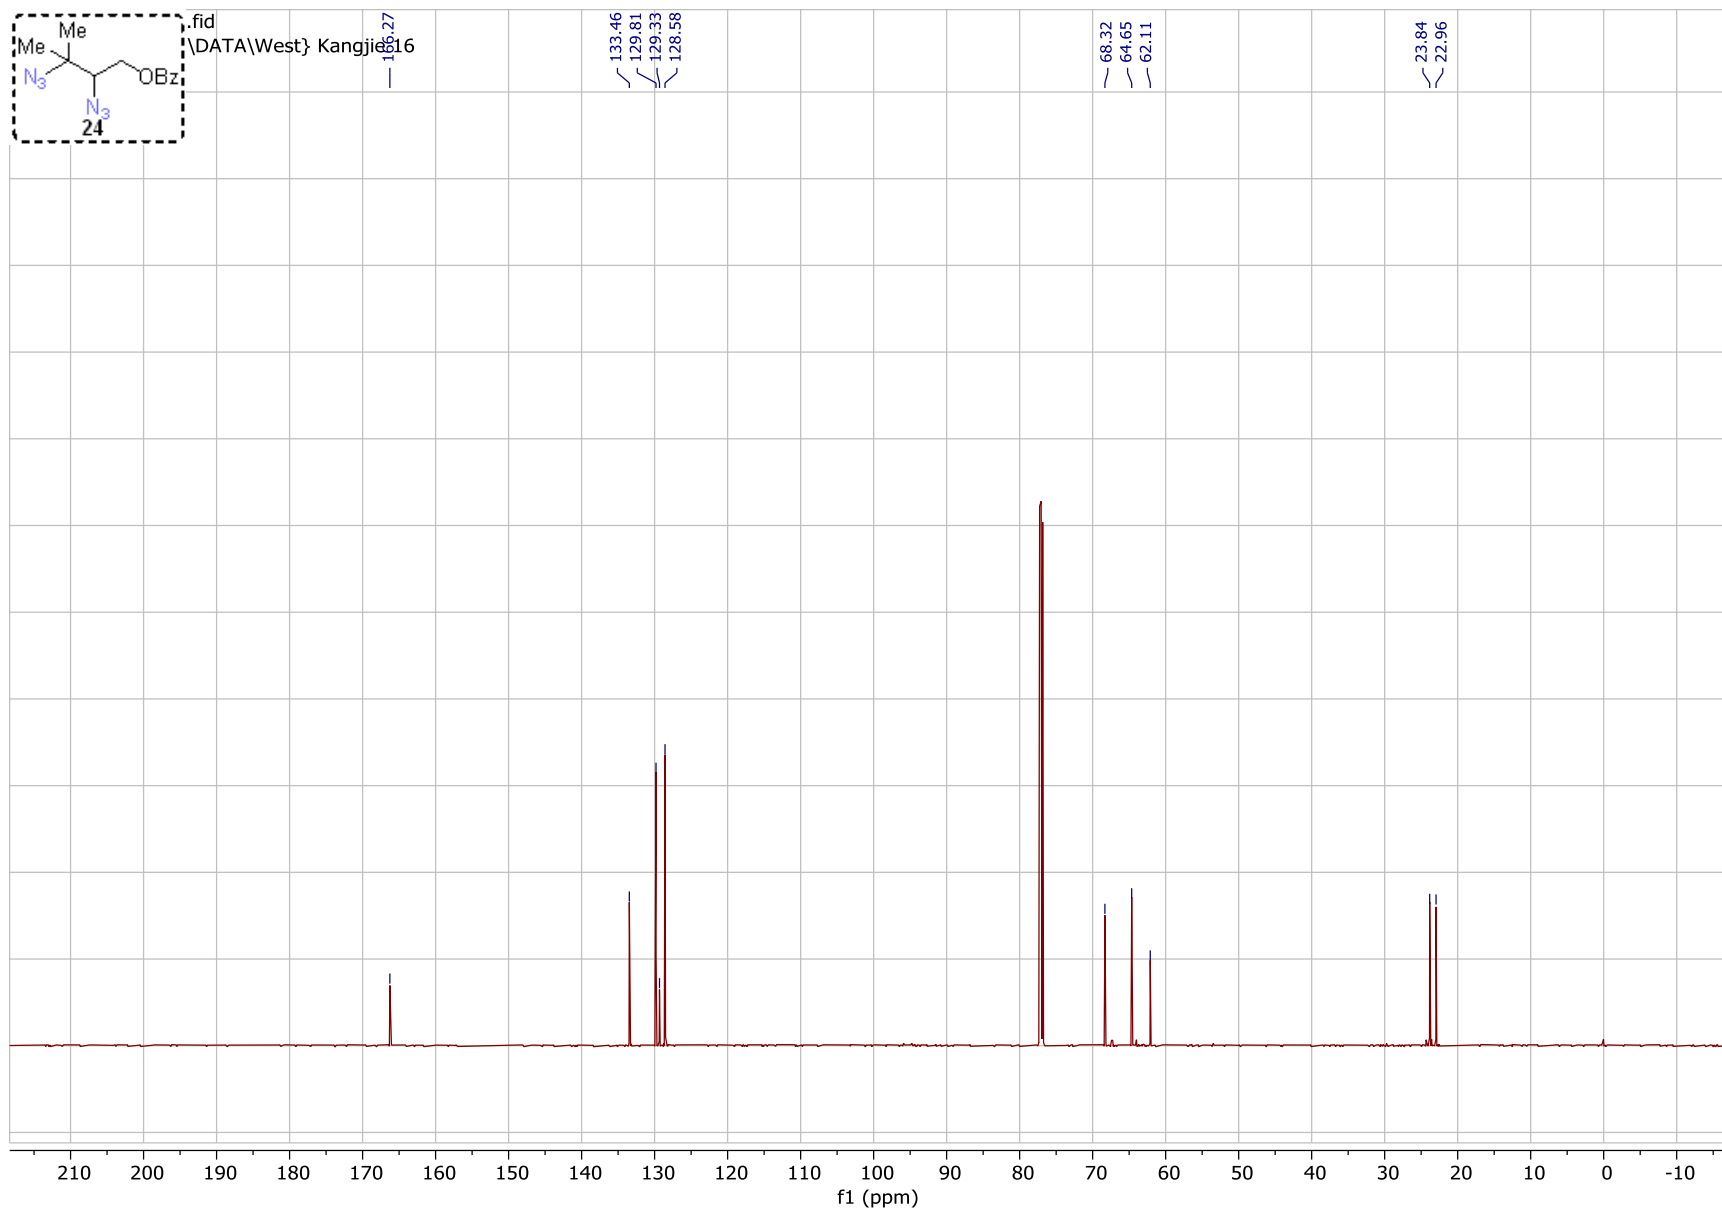

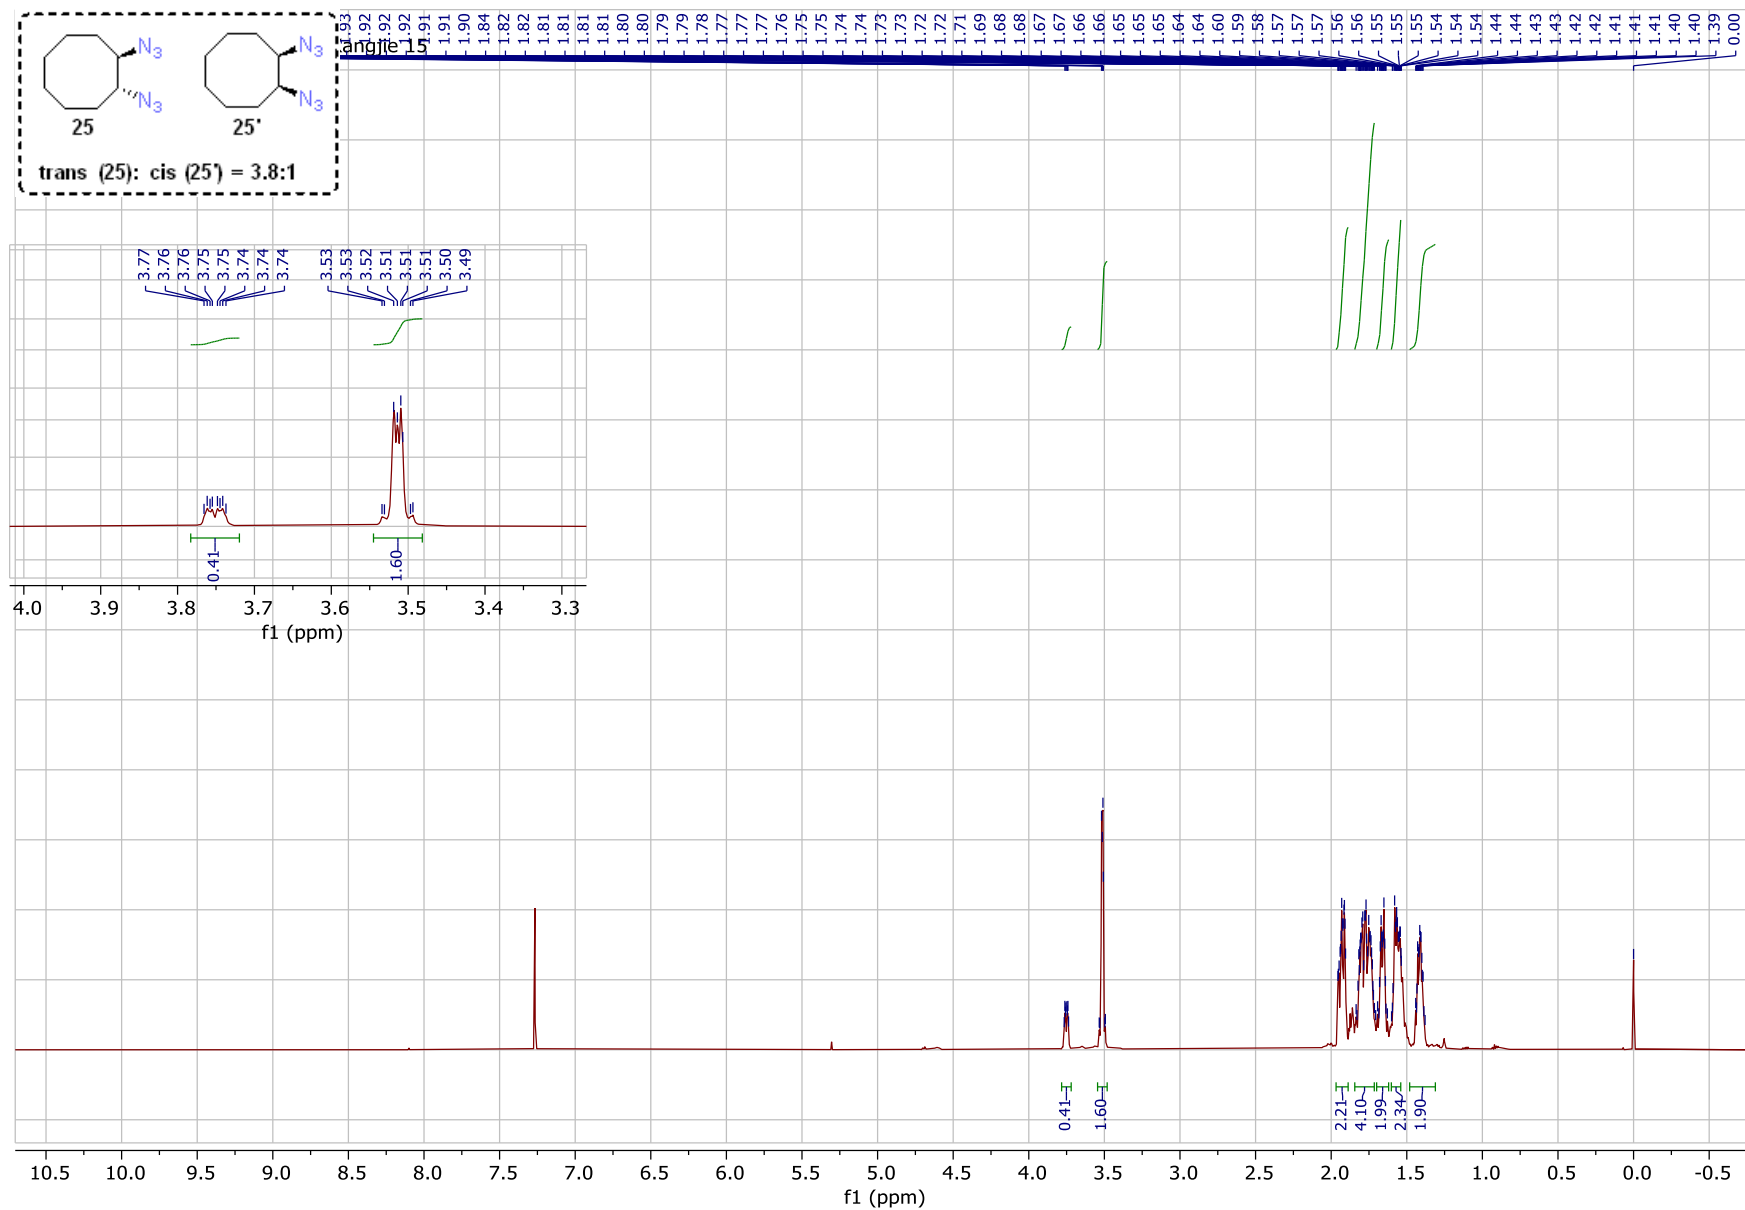

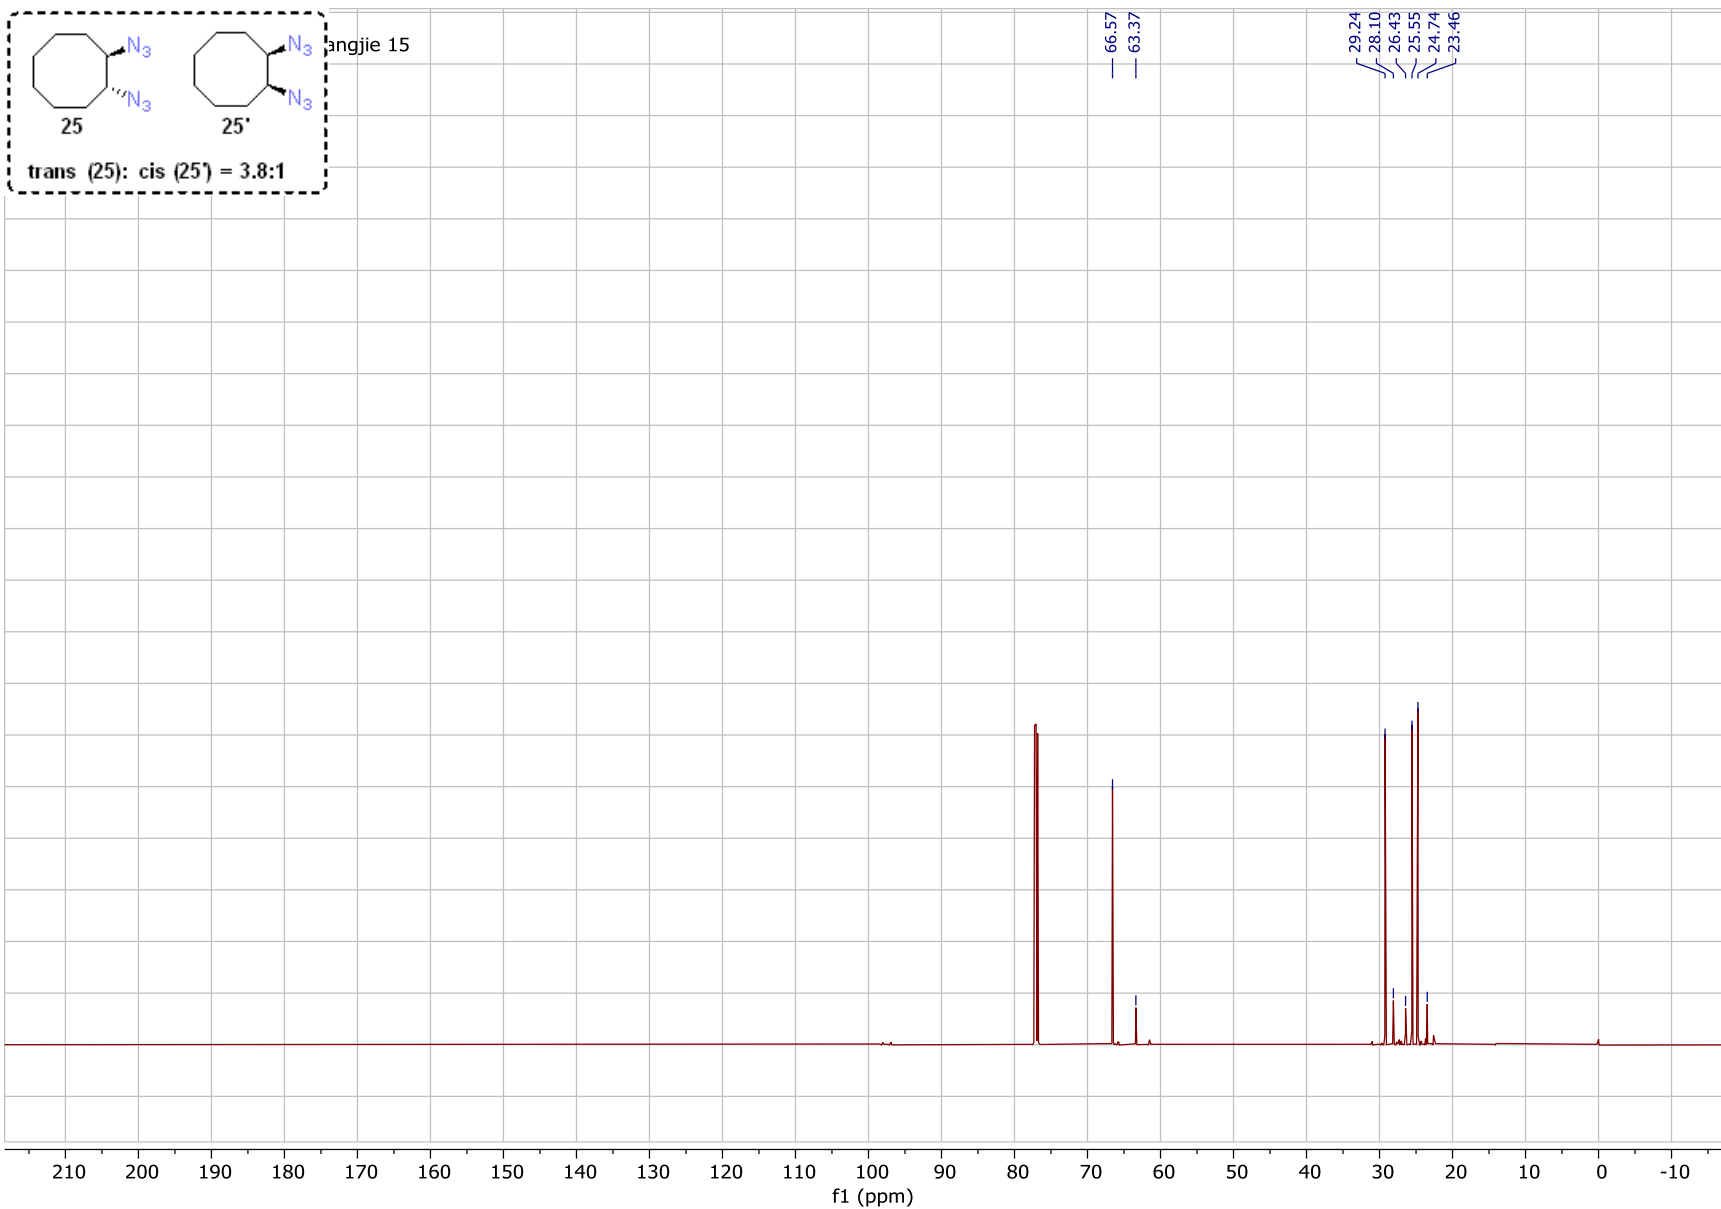

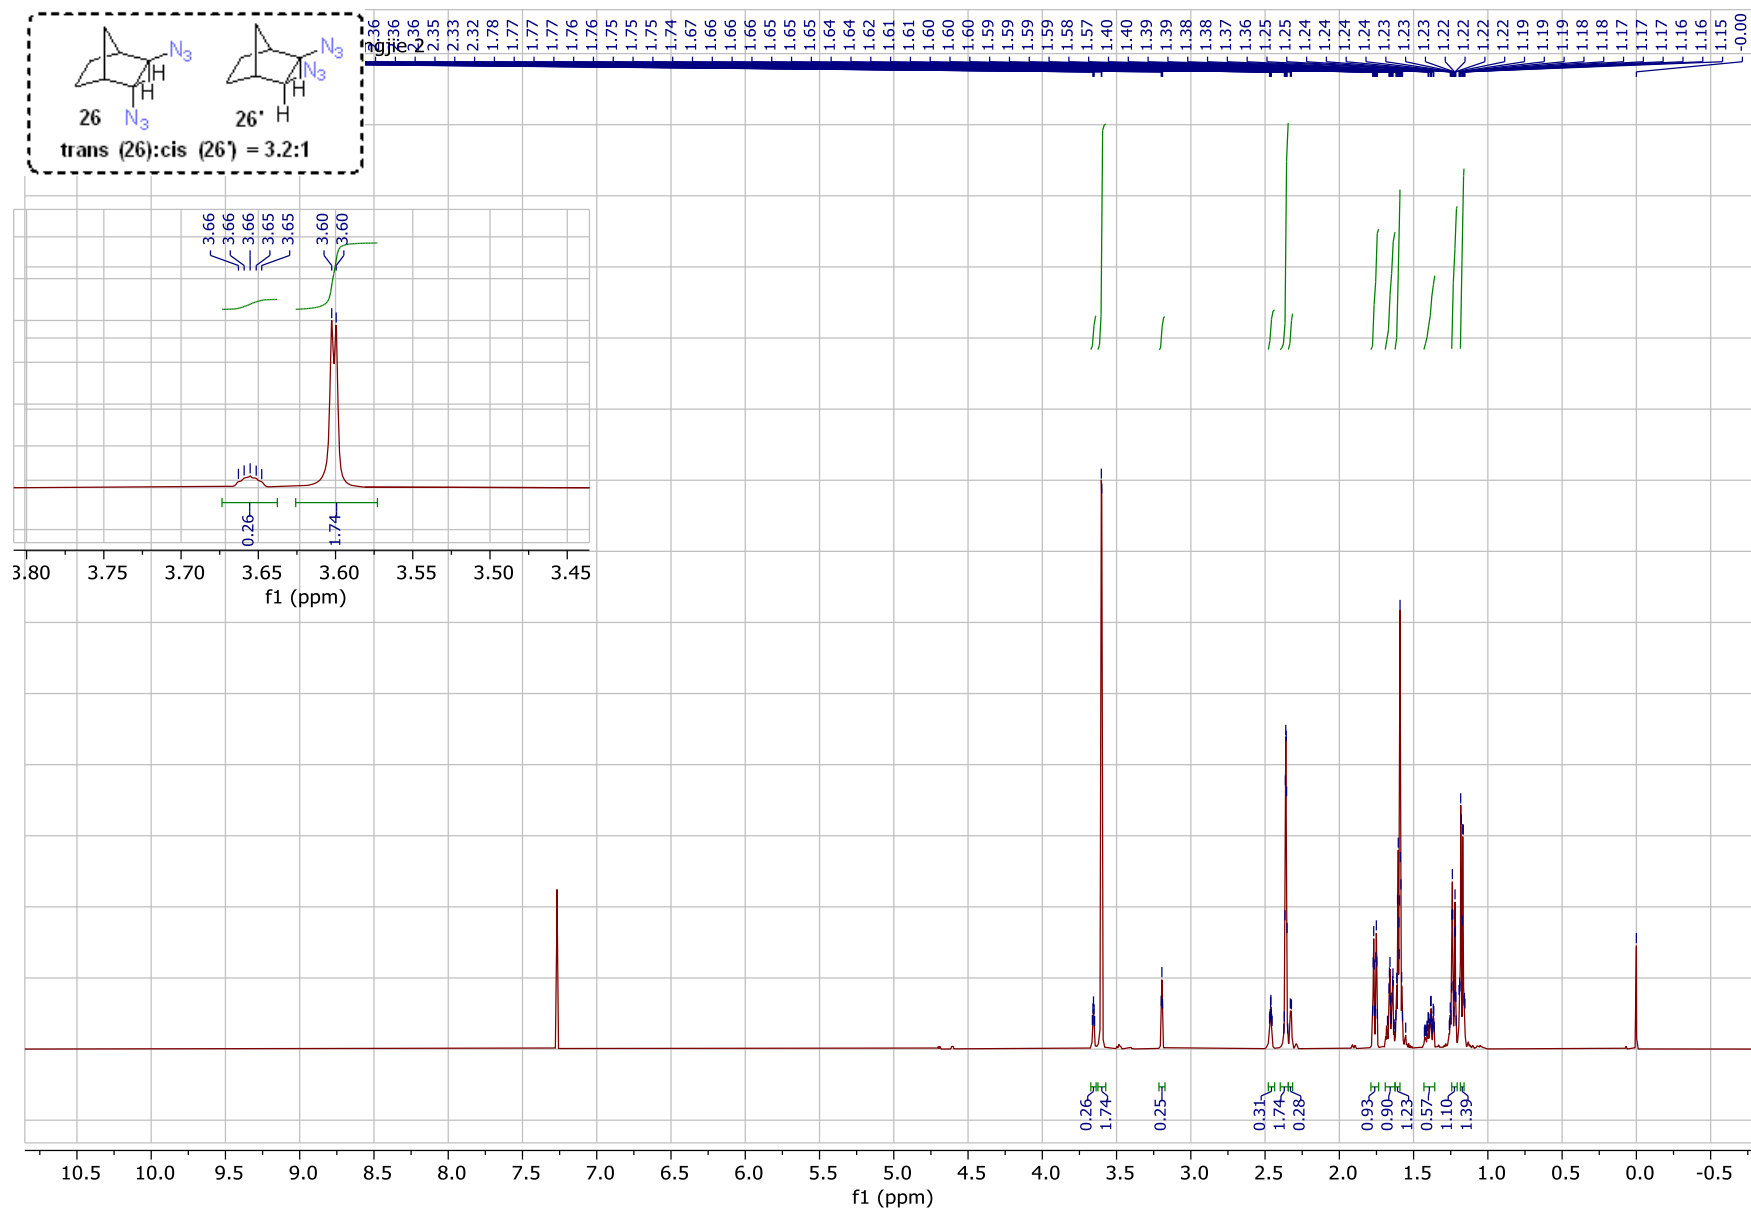

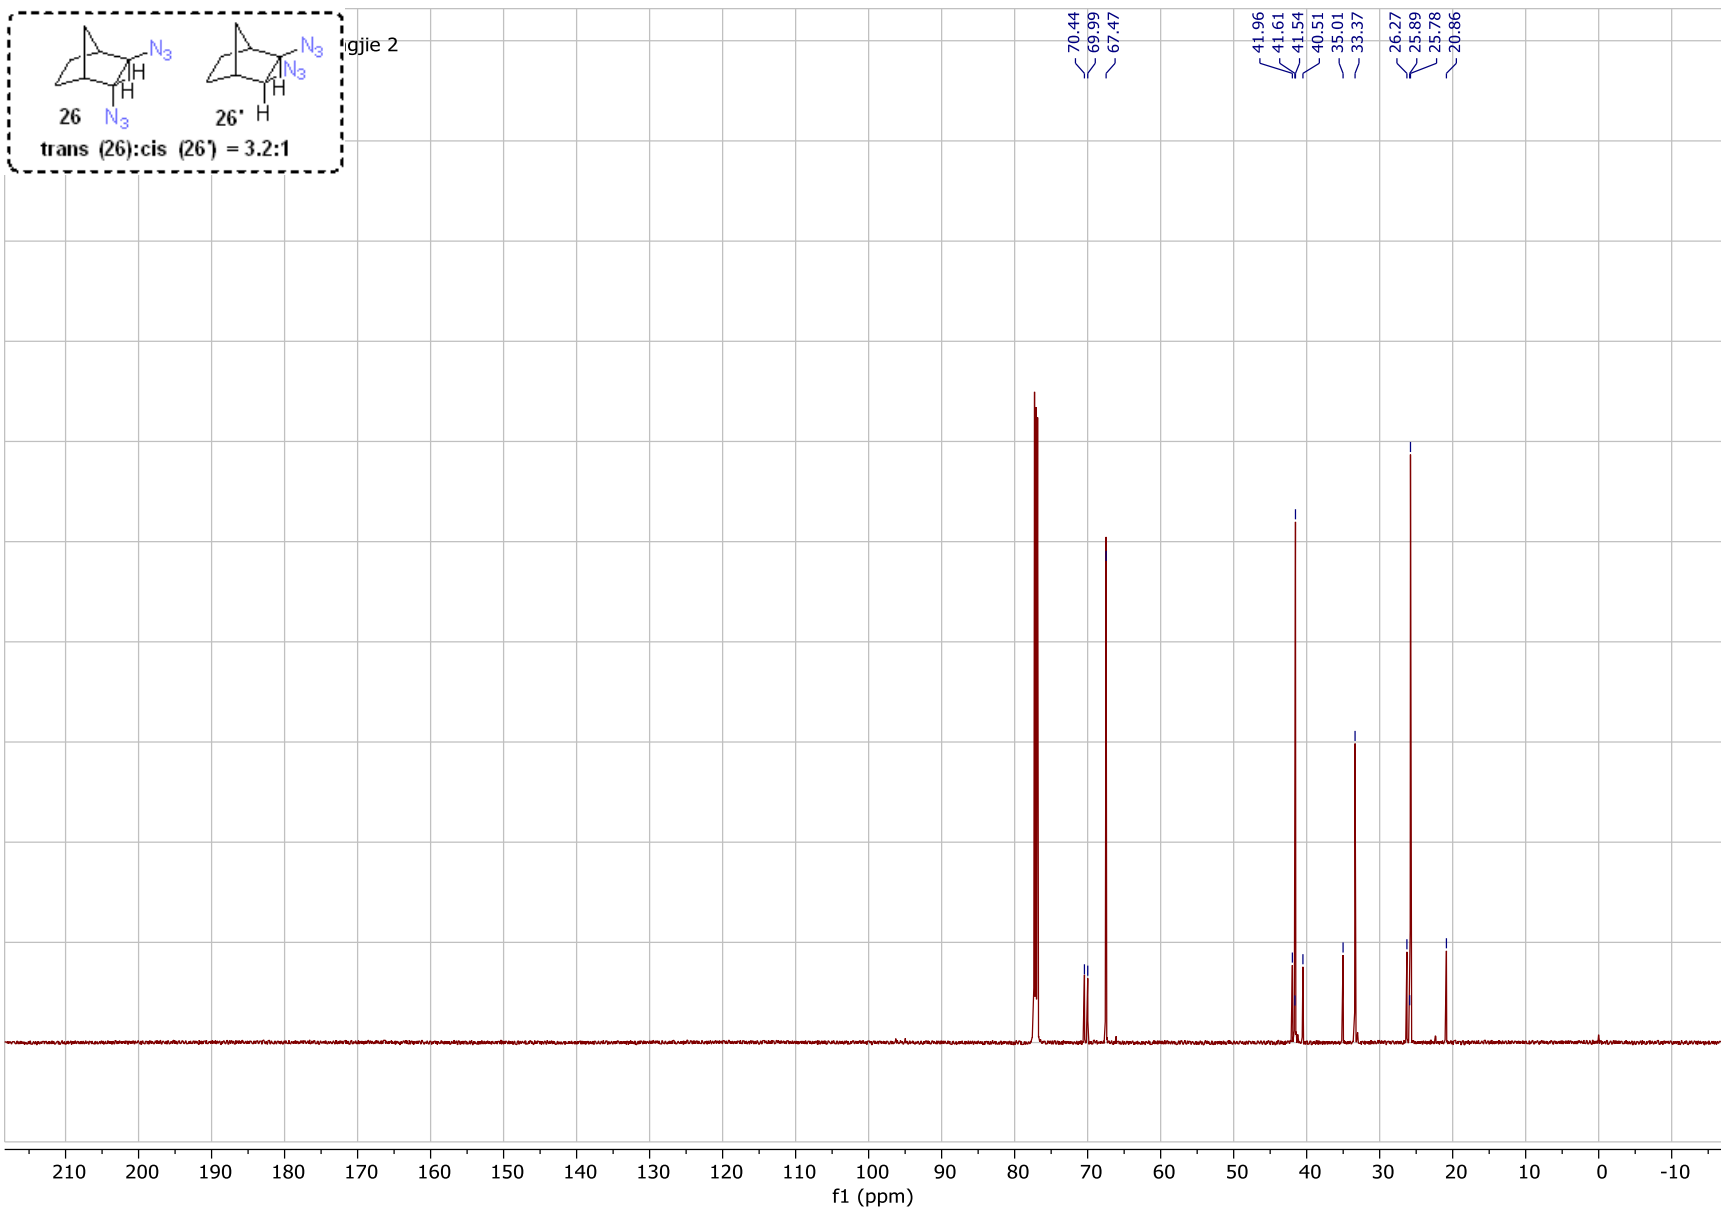

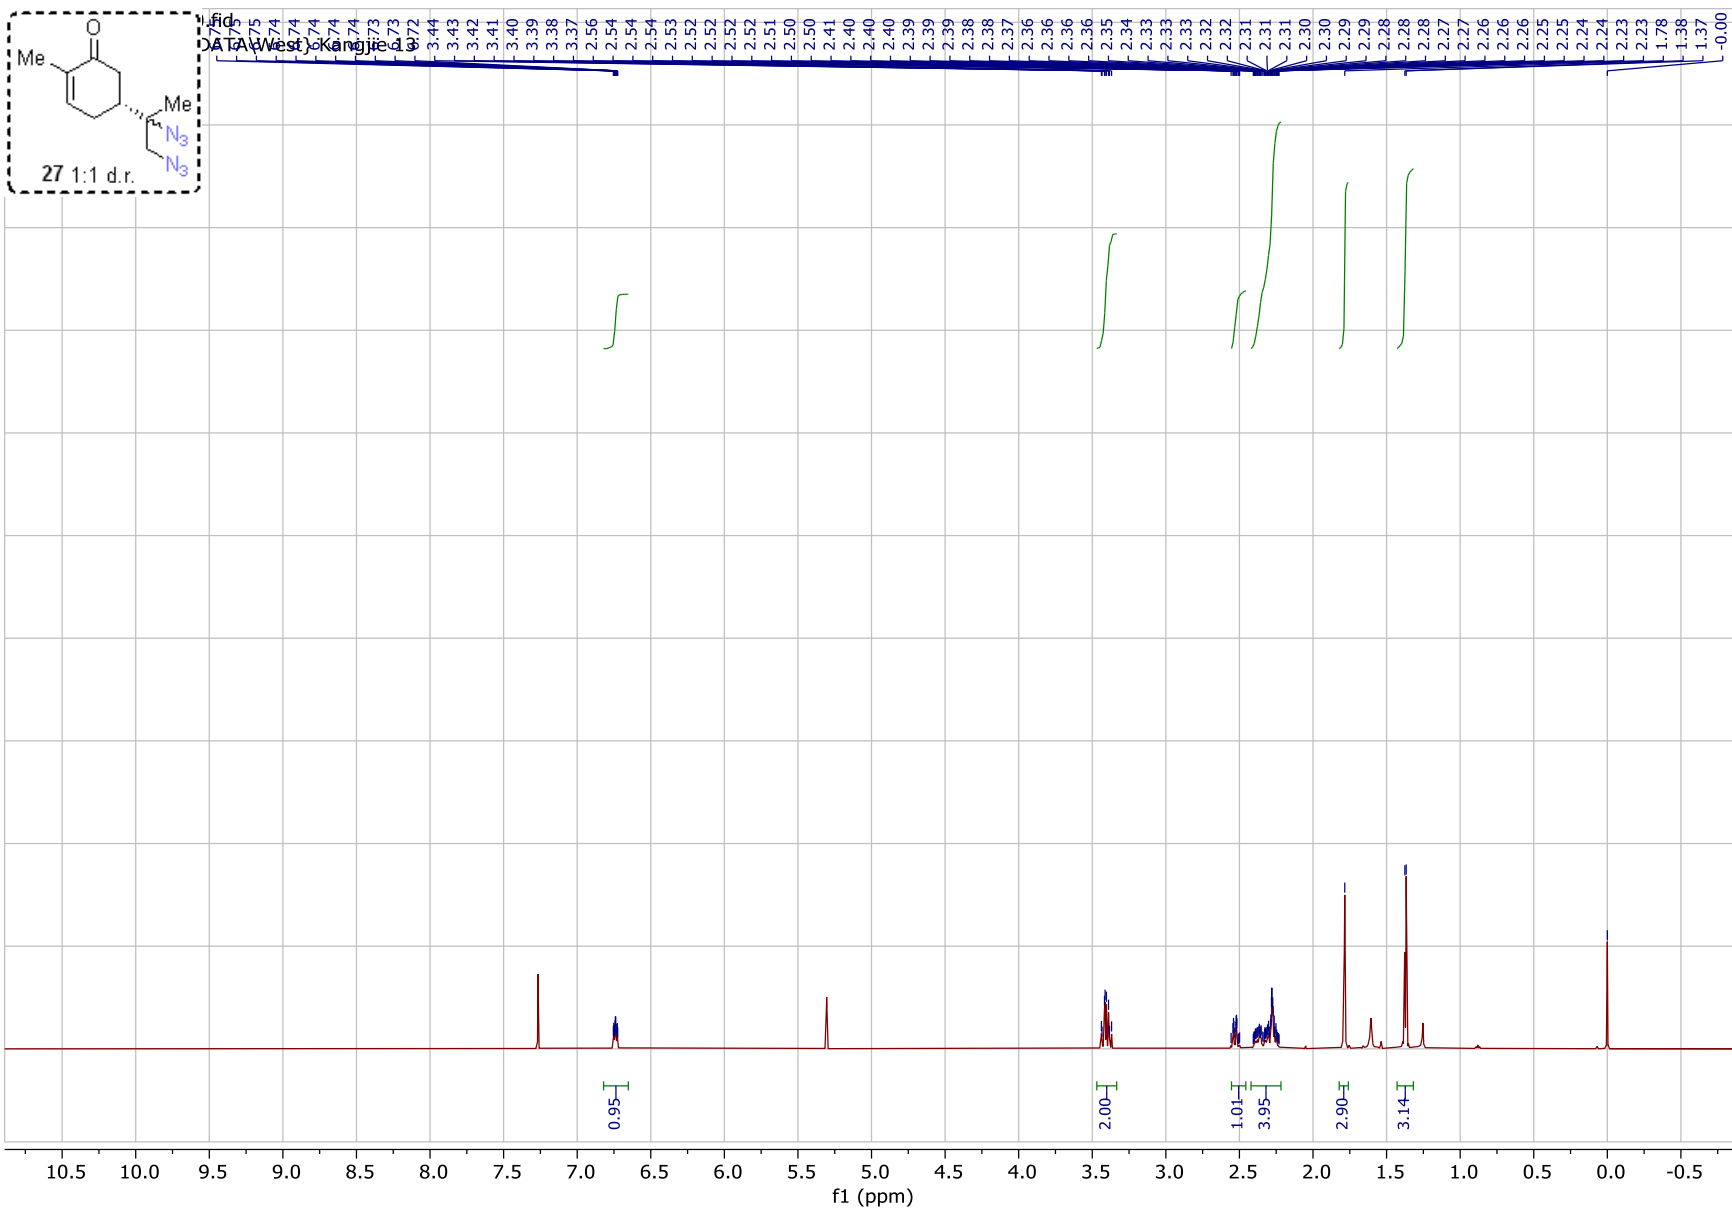

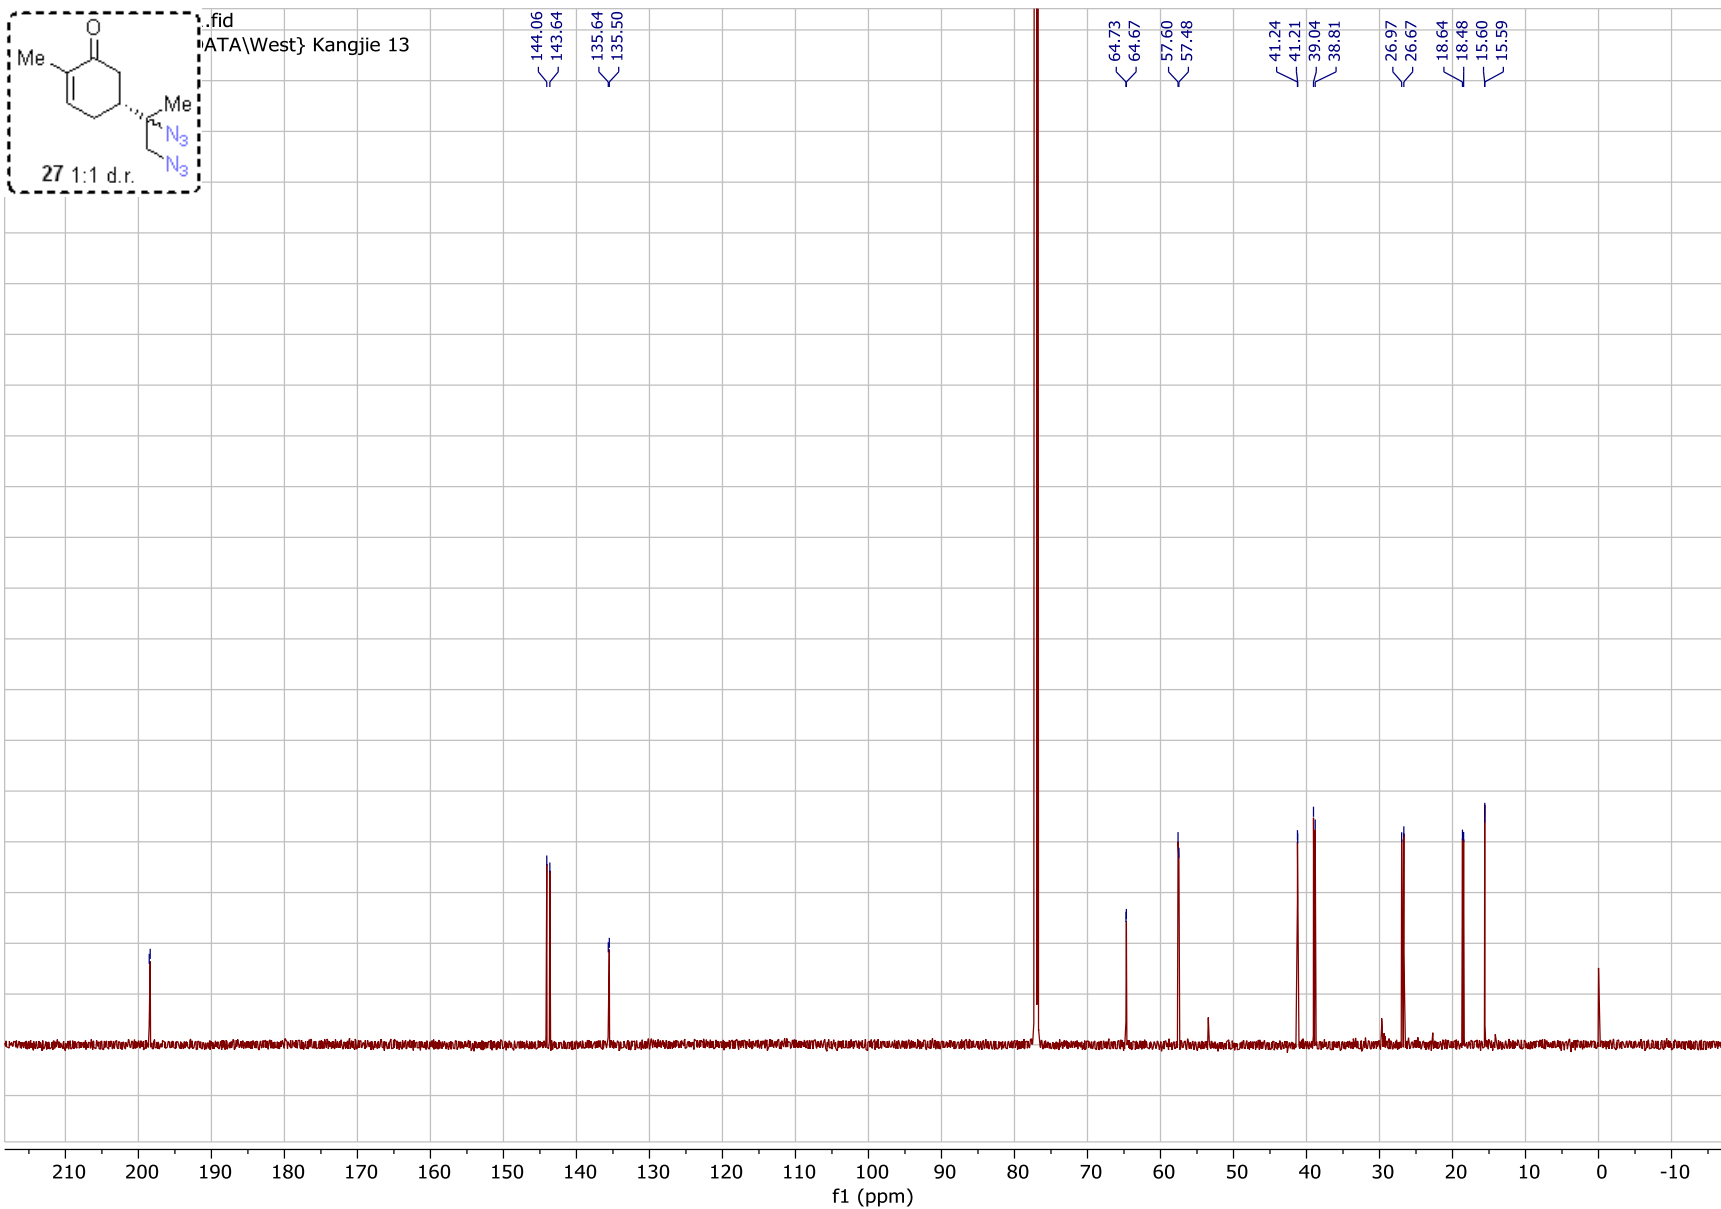

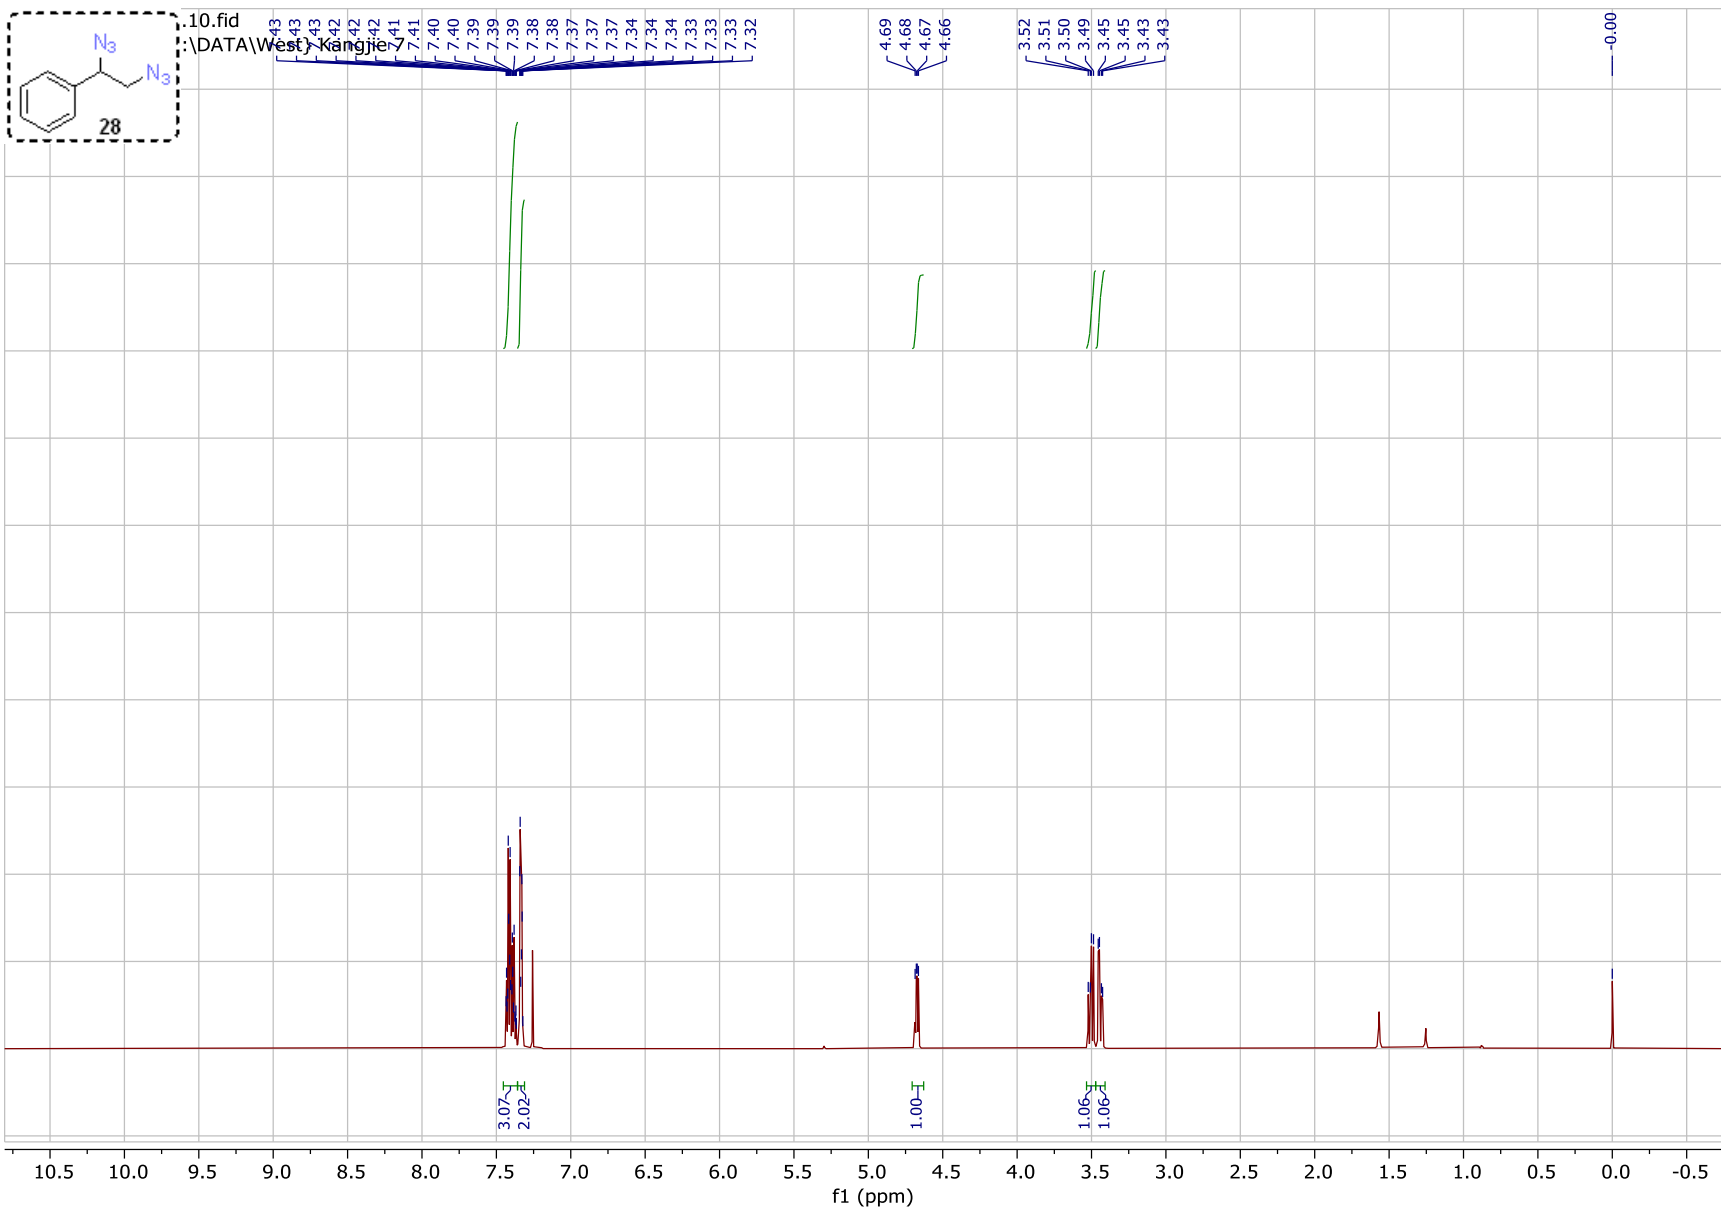



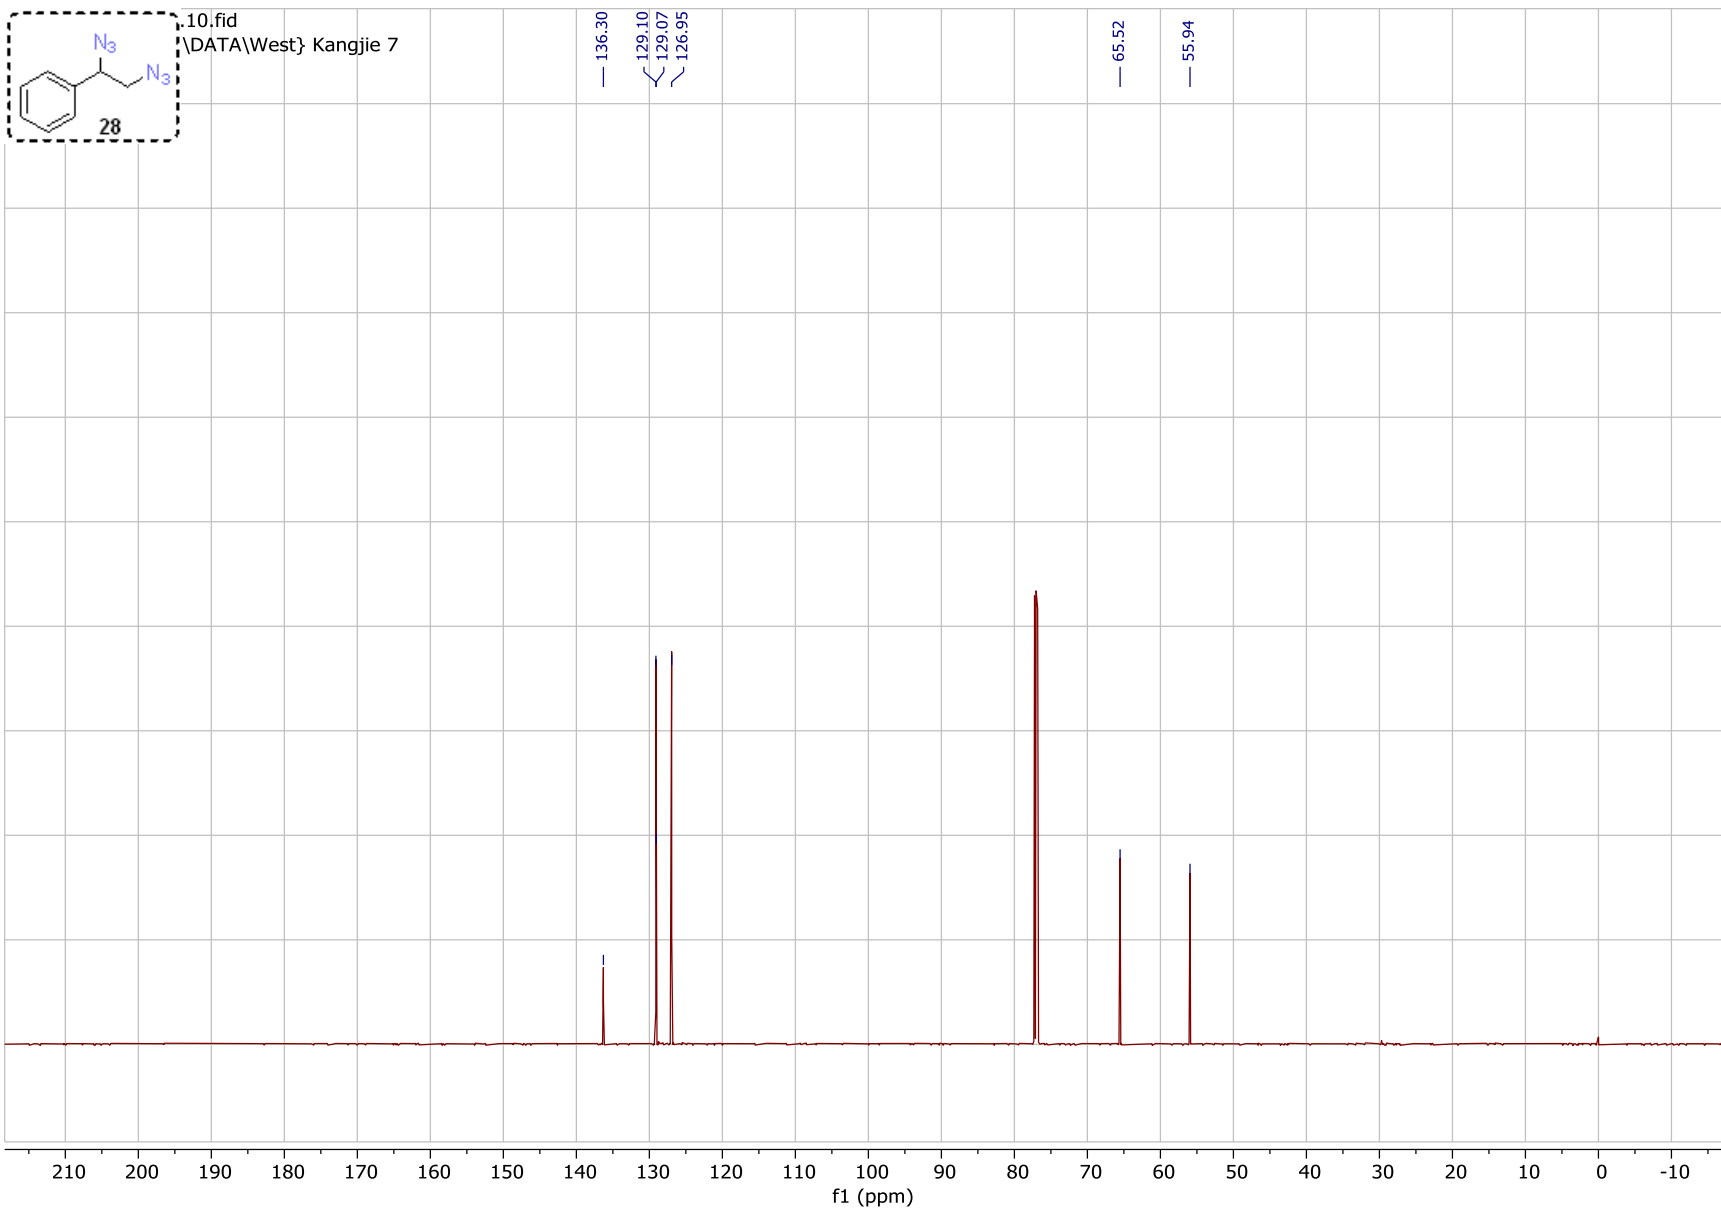

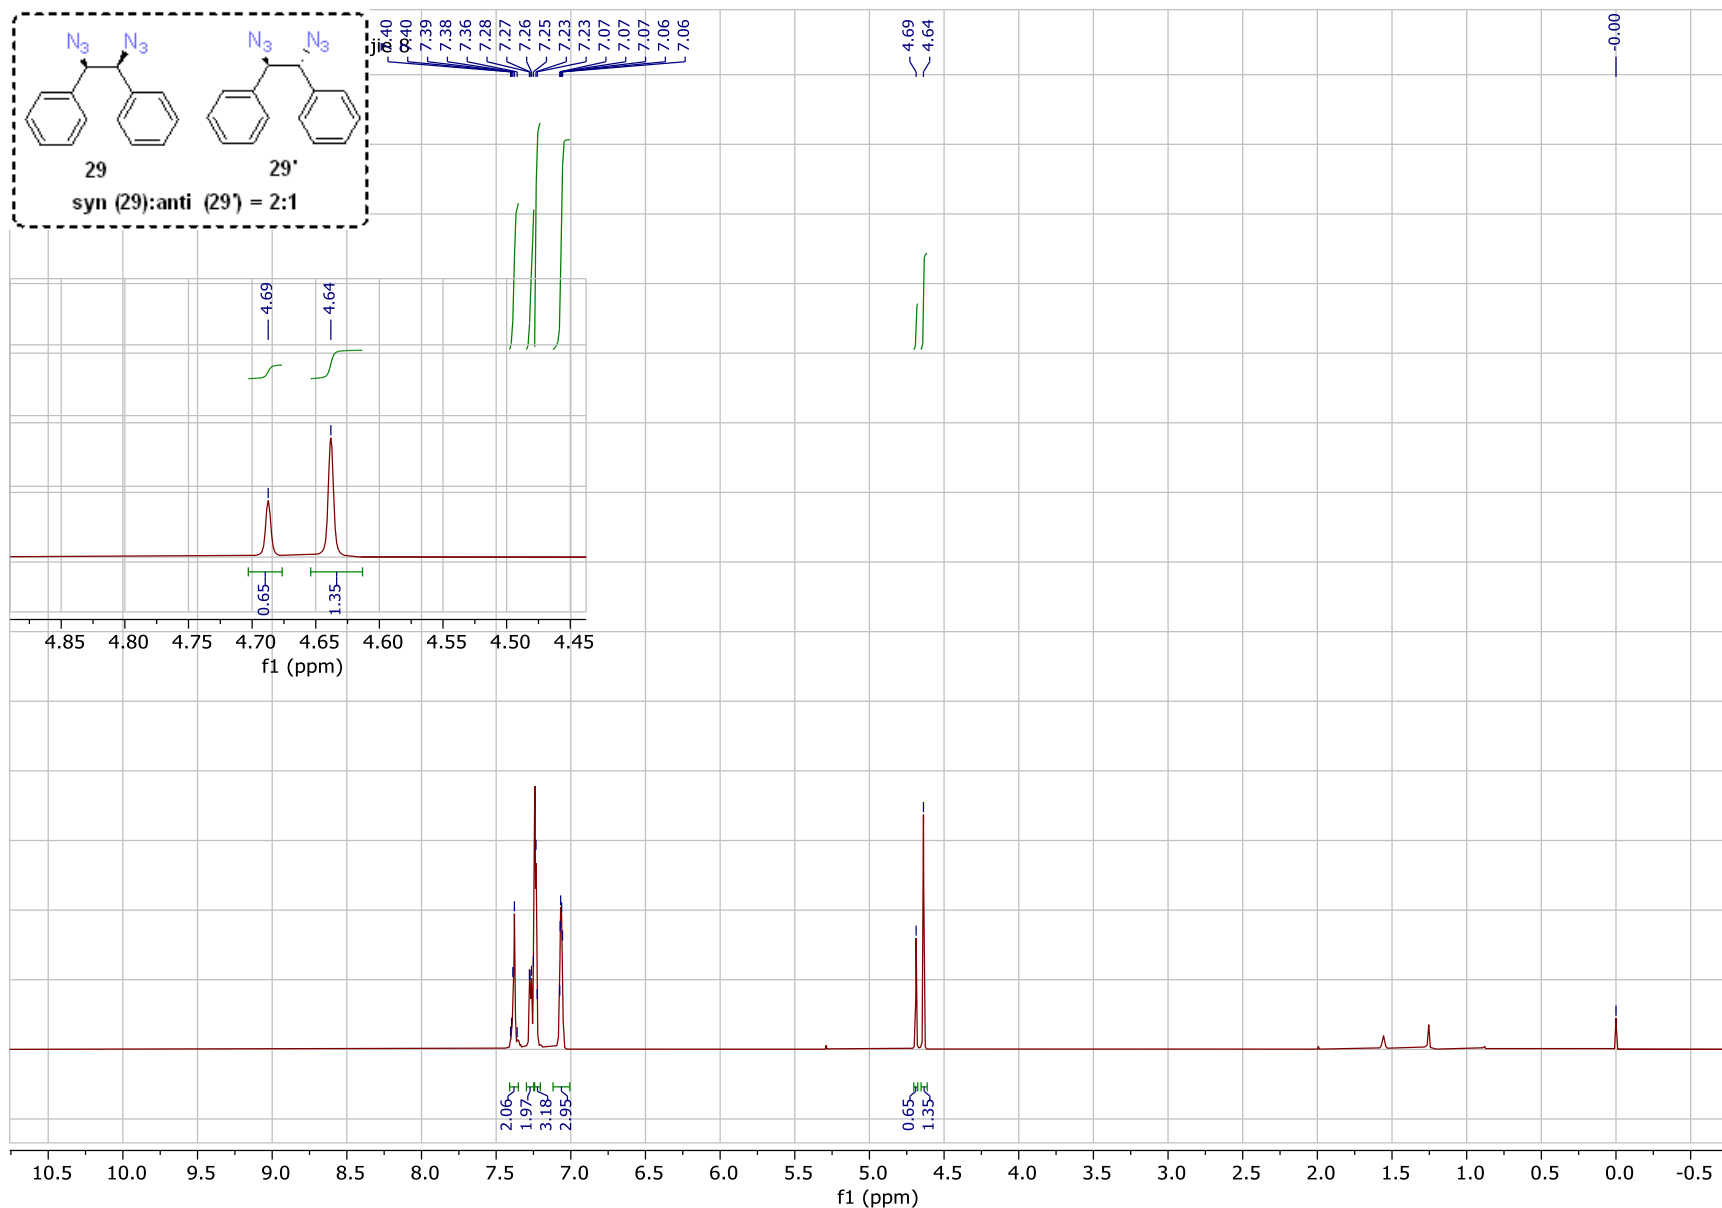

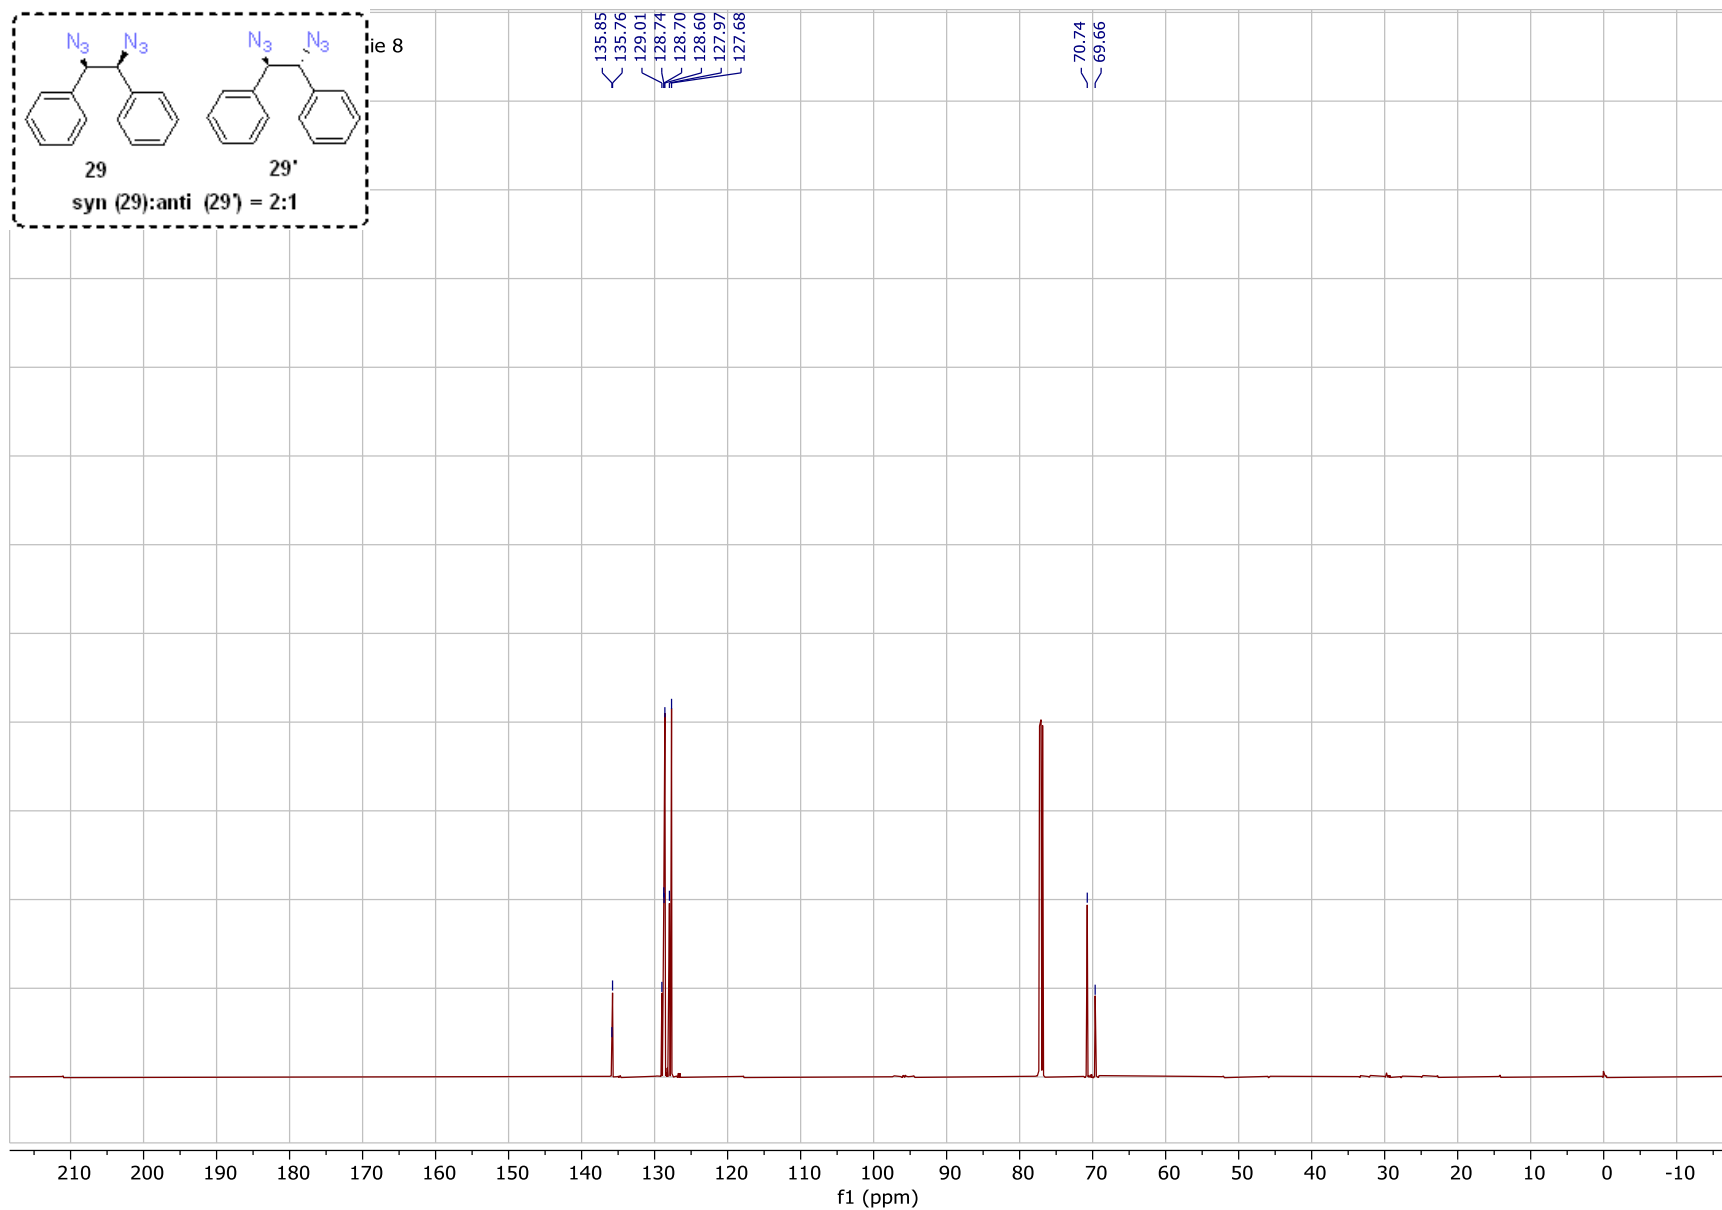

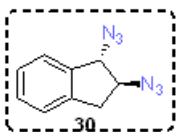

10.fid

D:\DATA\West\Kangjie

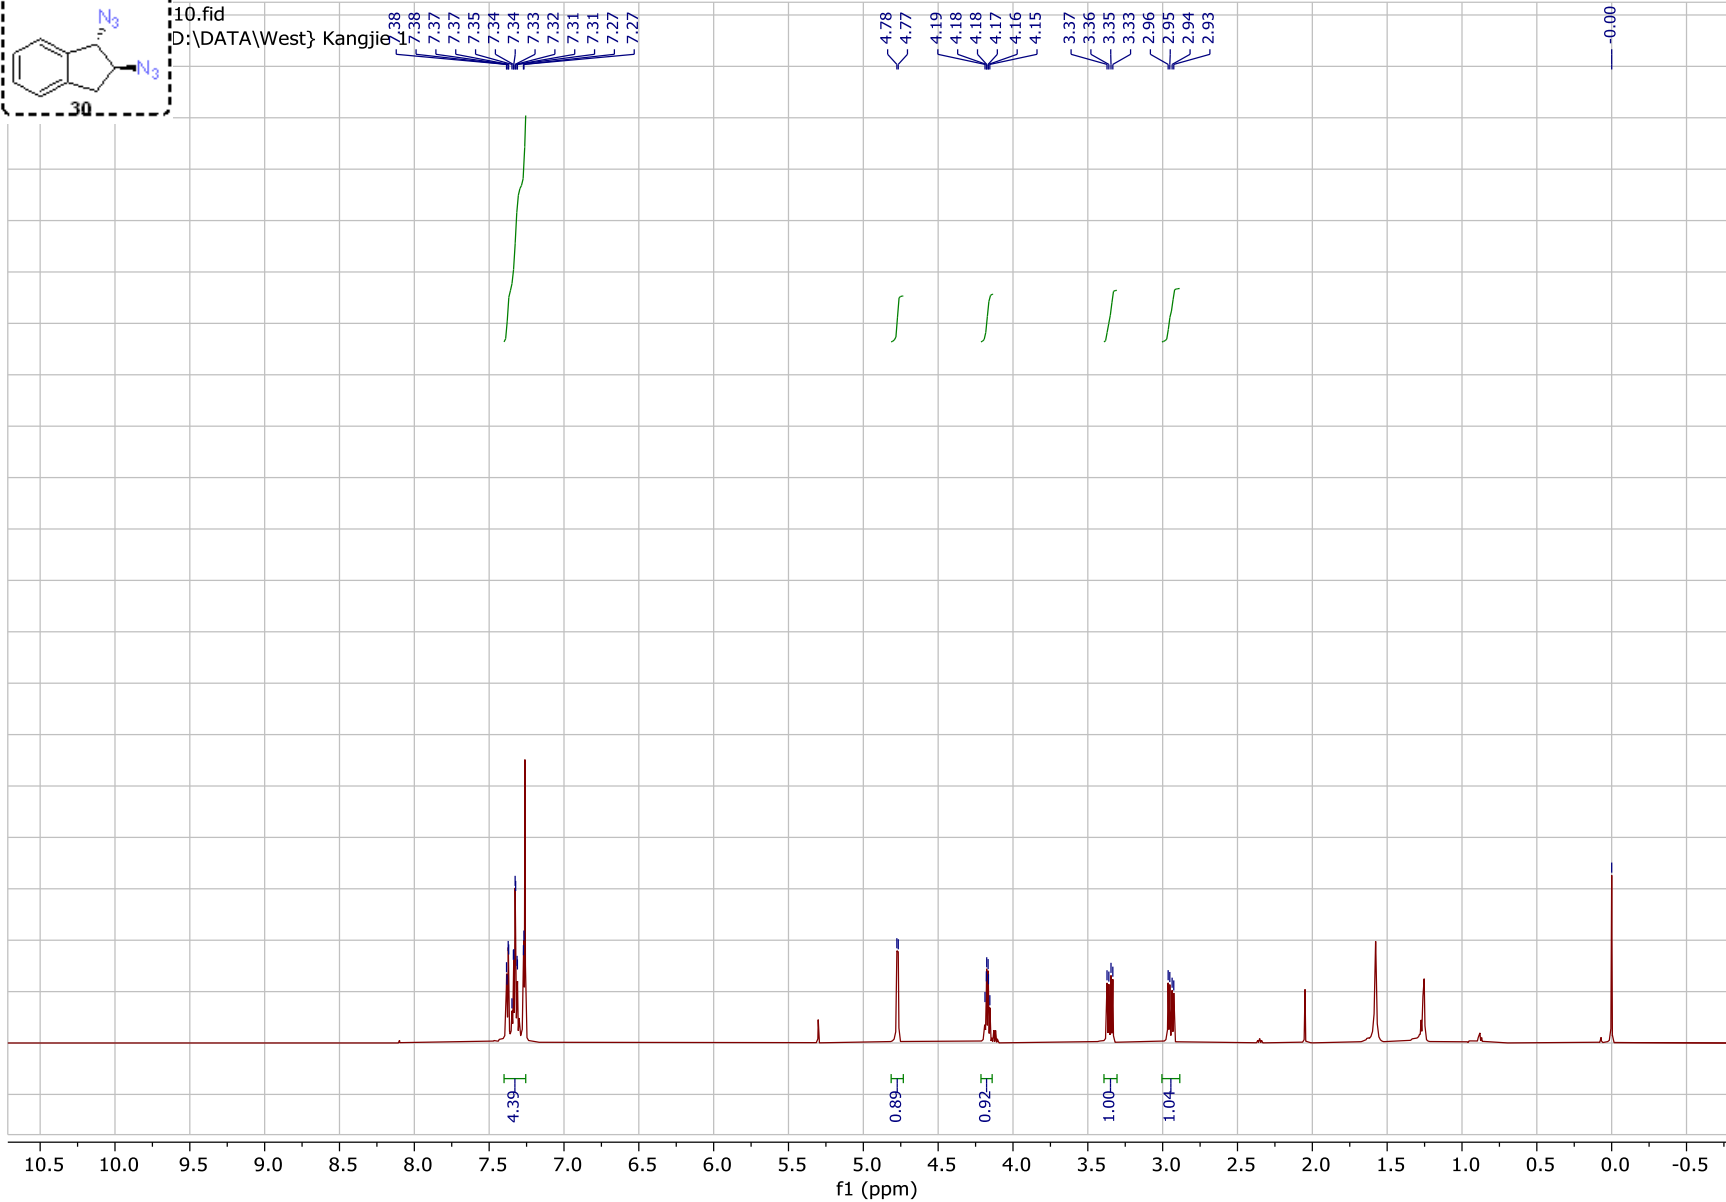

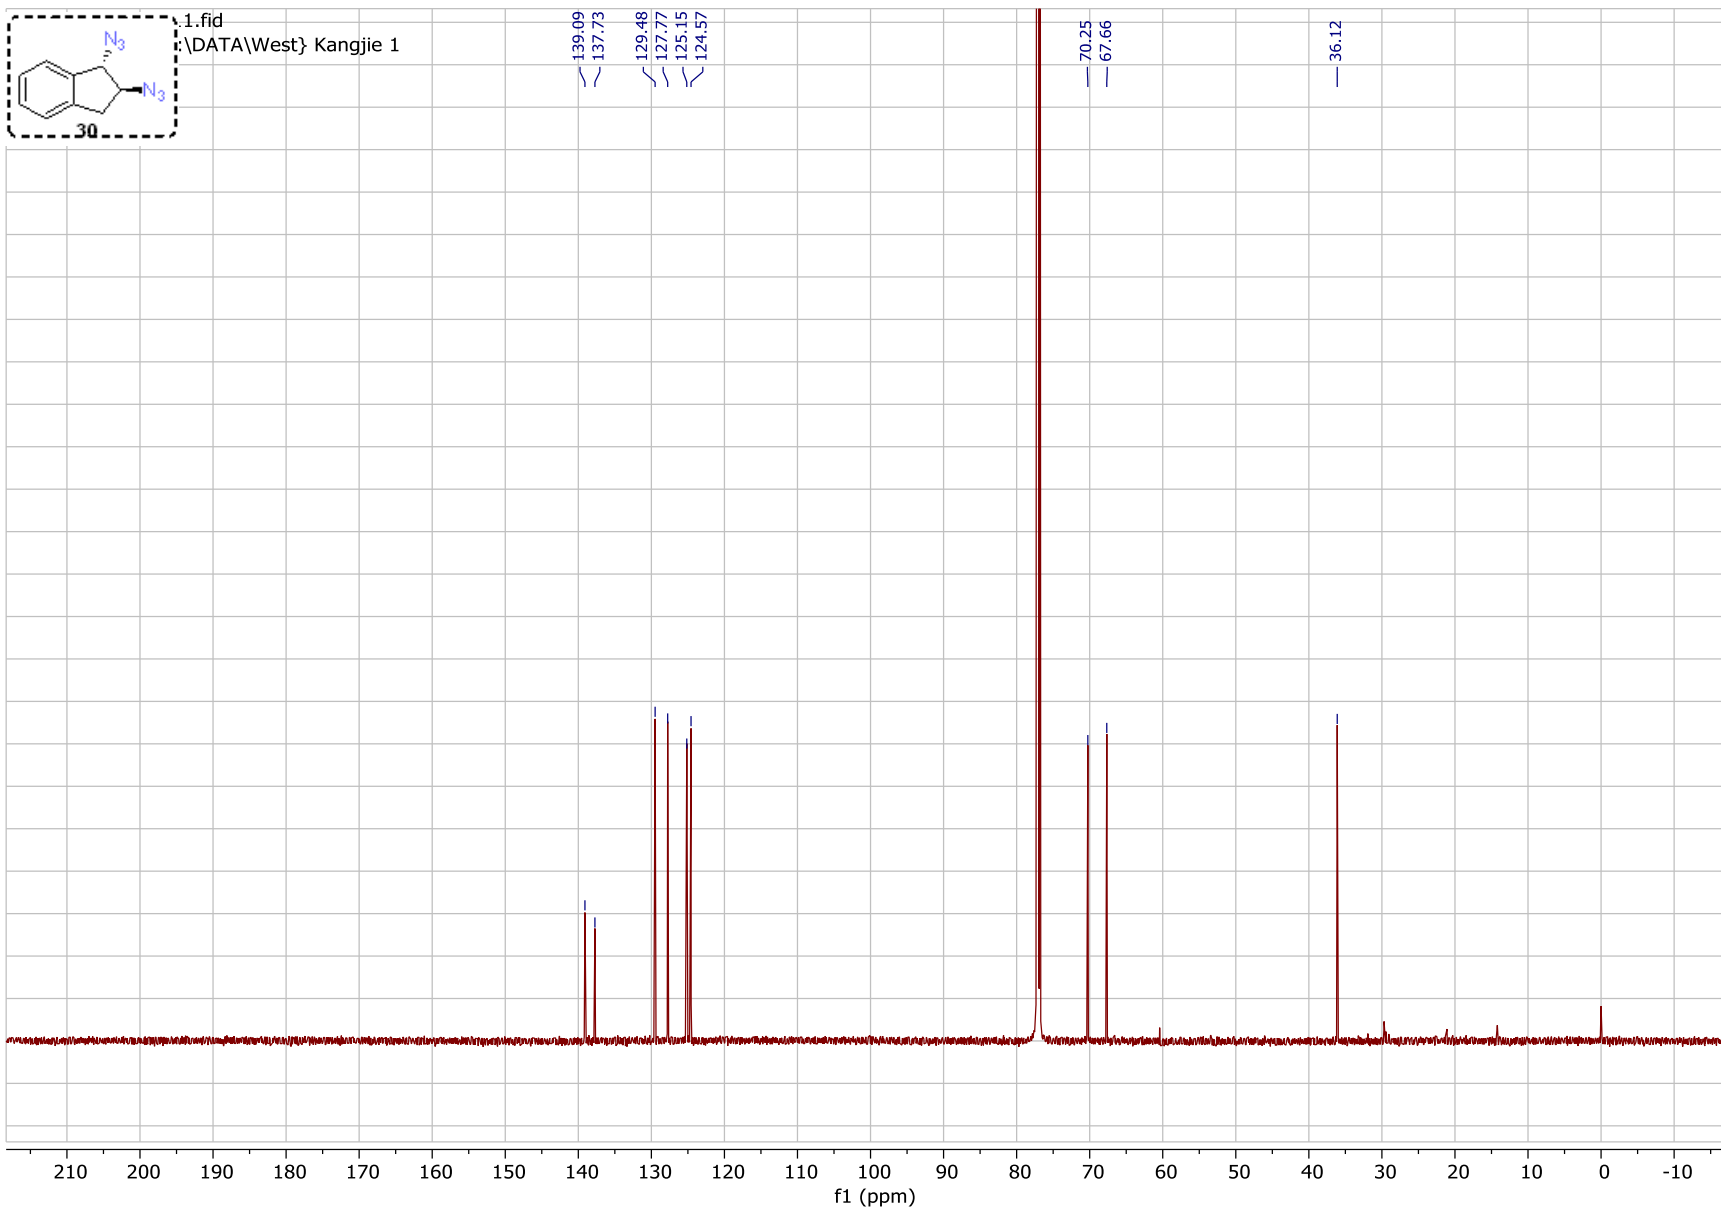

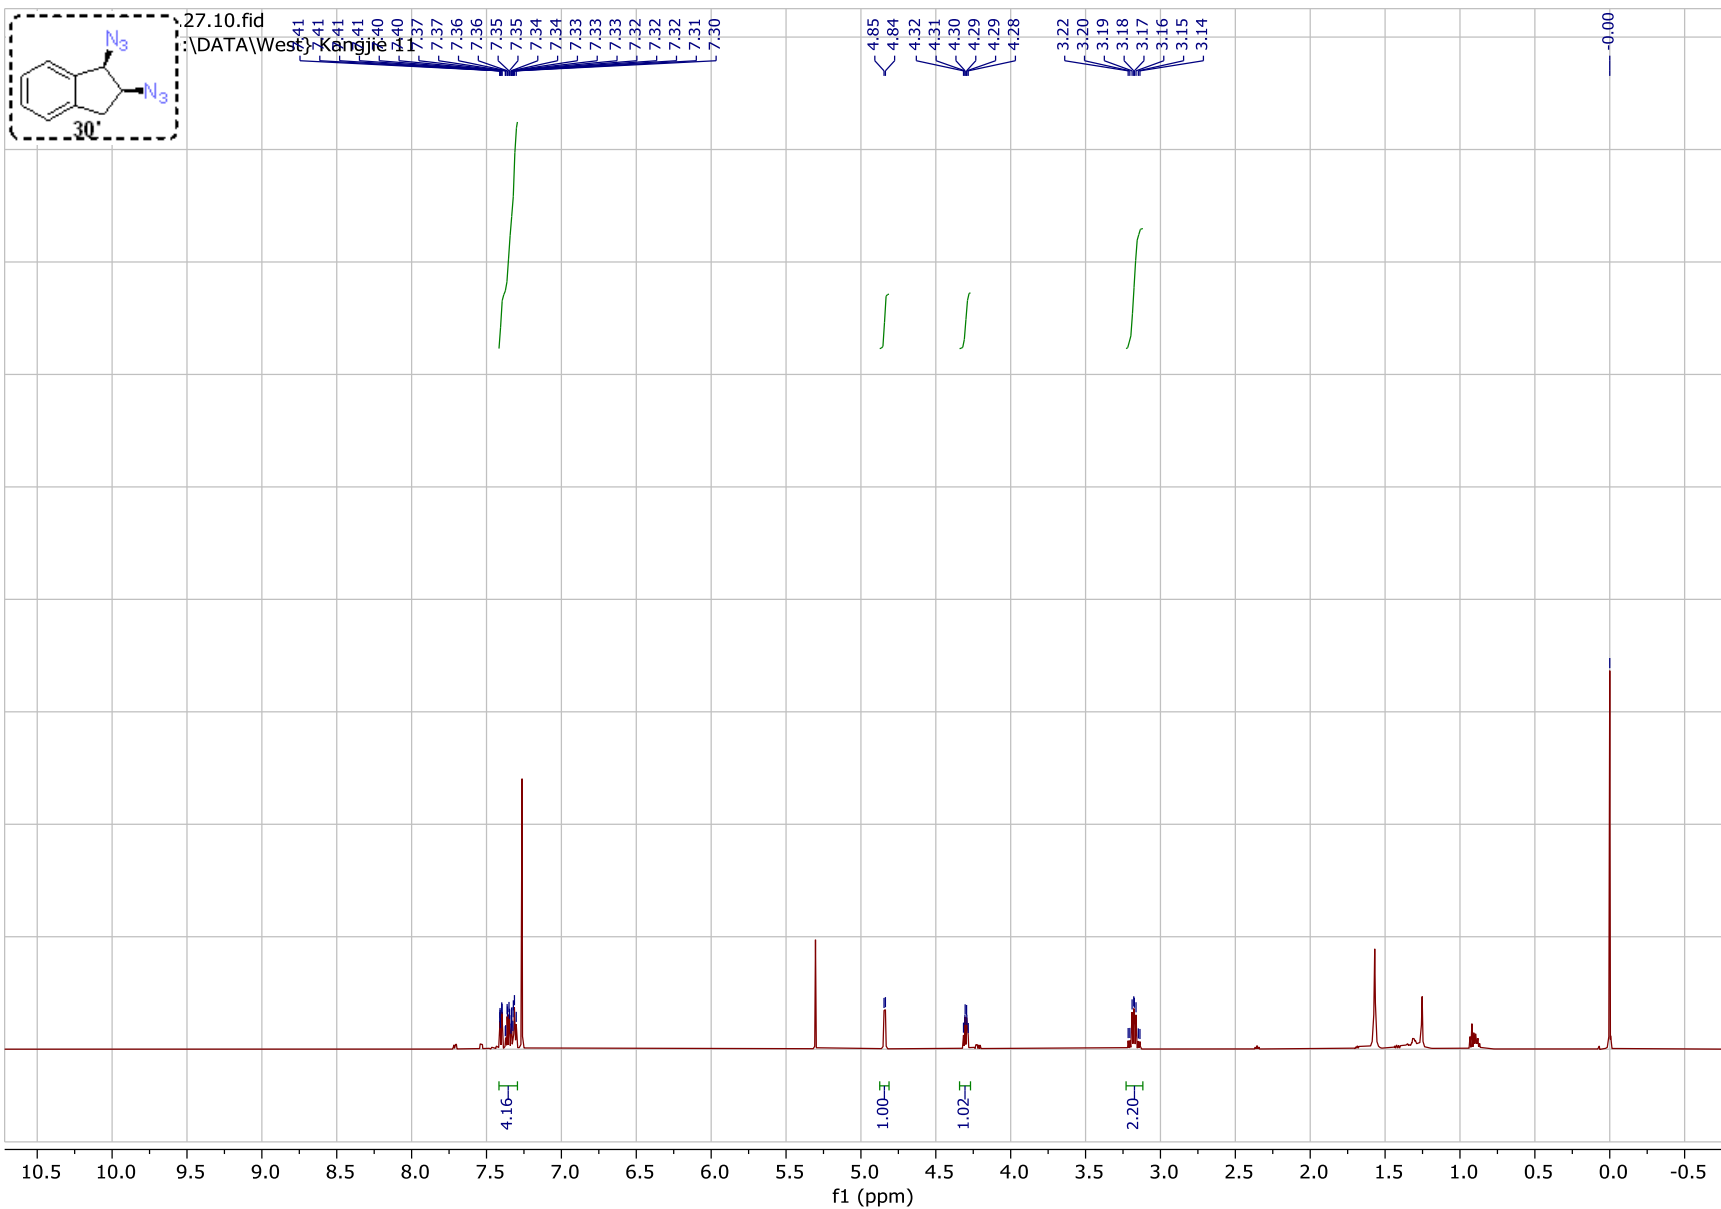

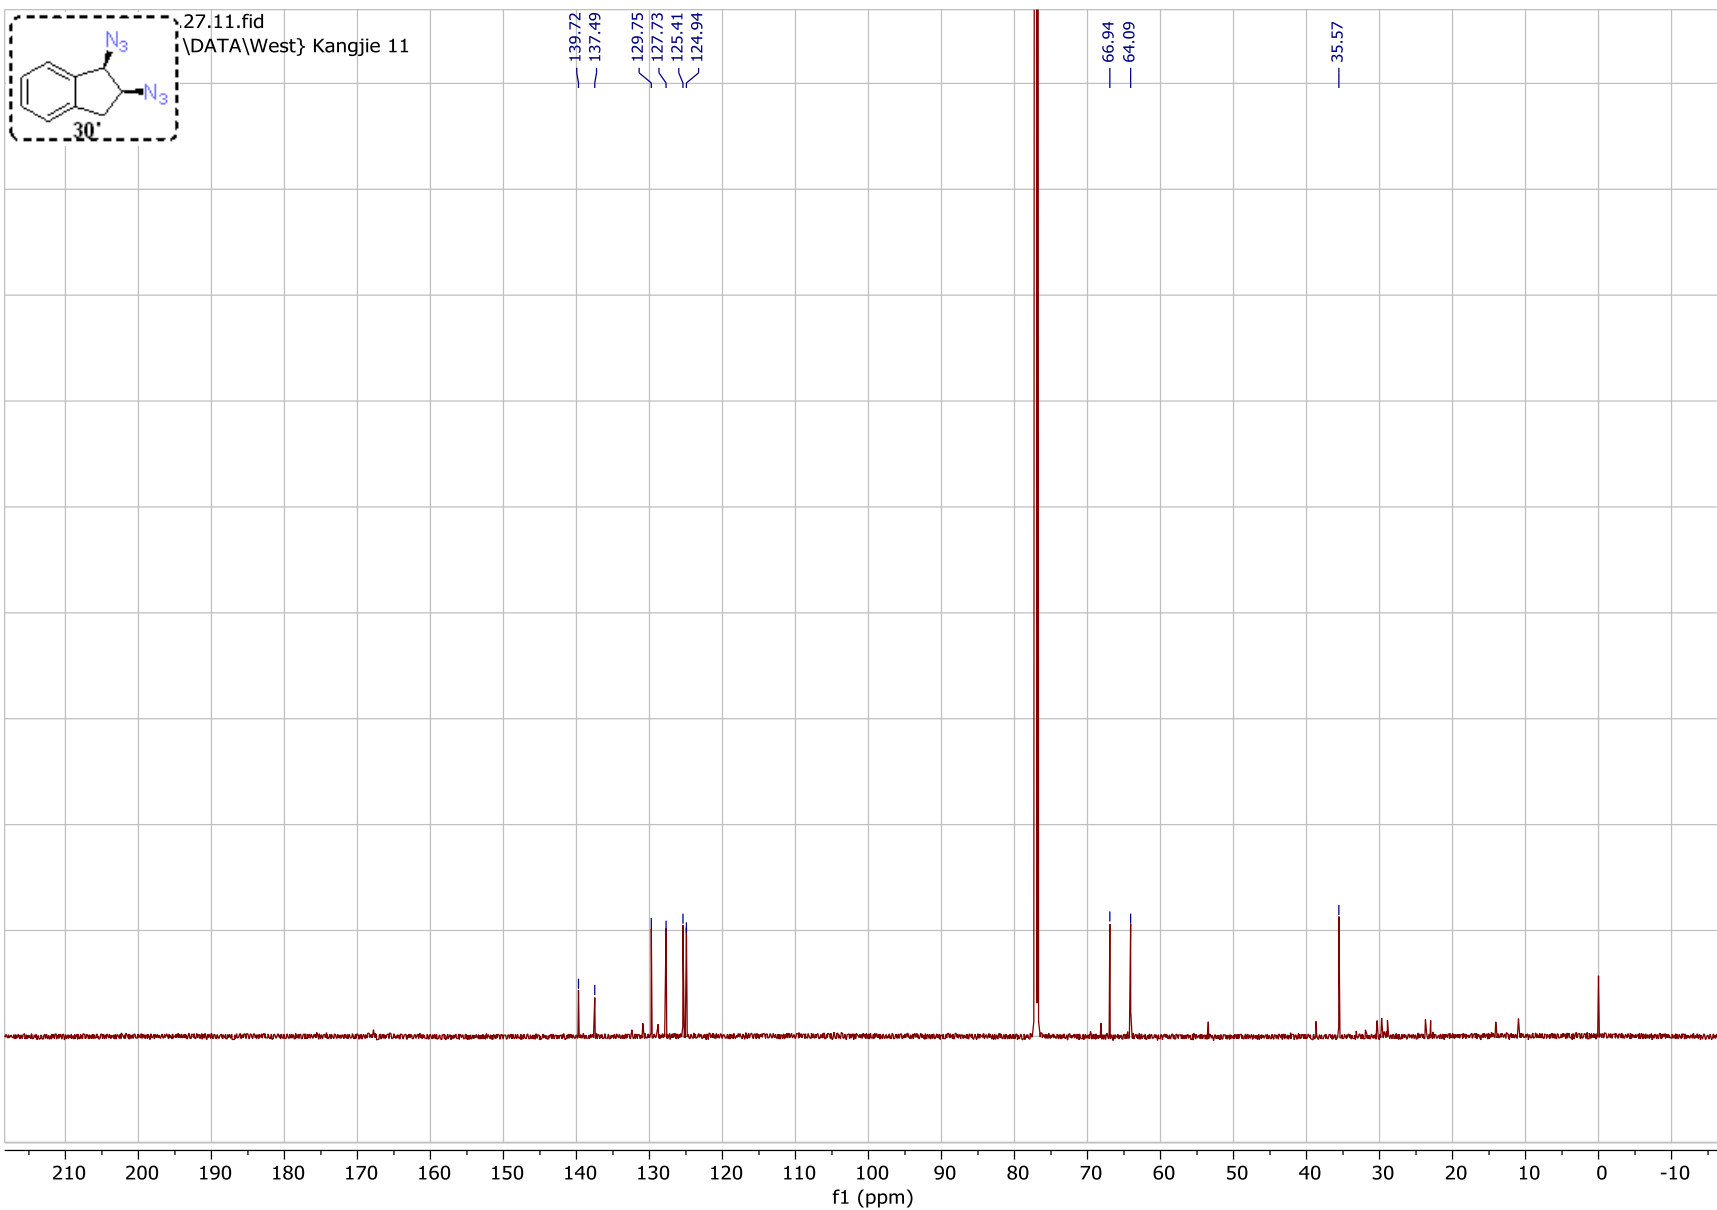





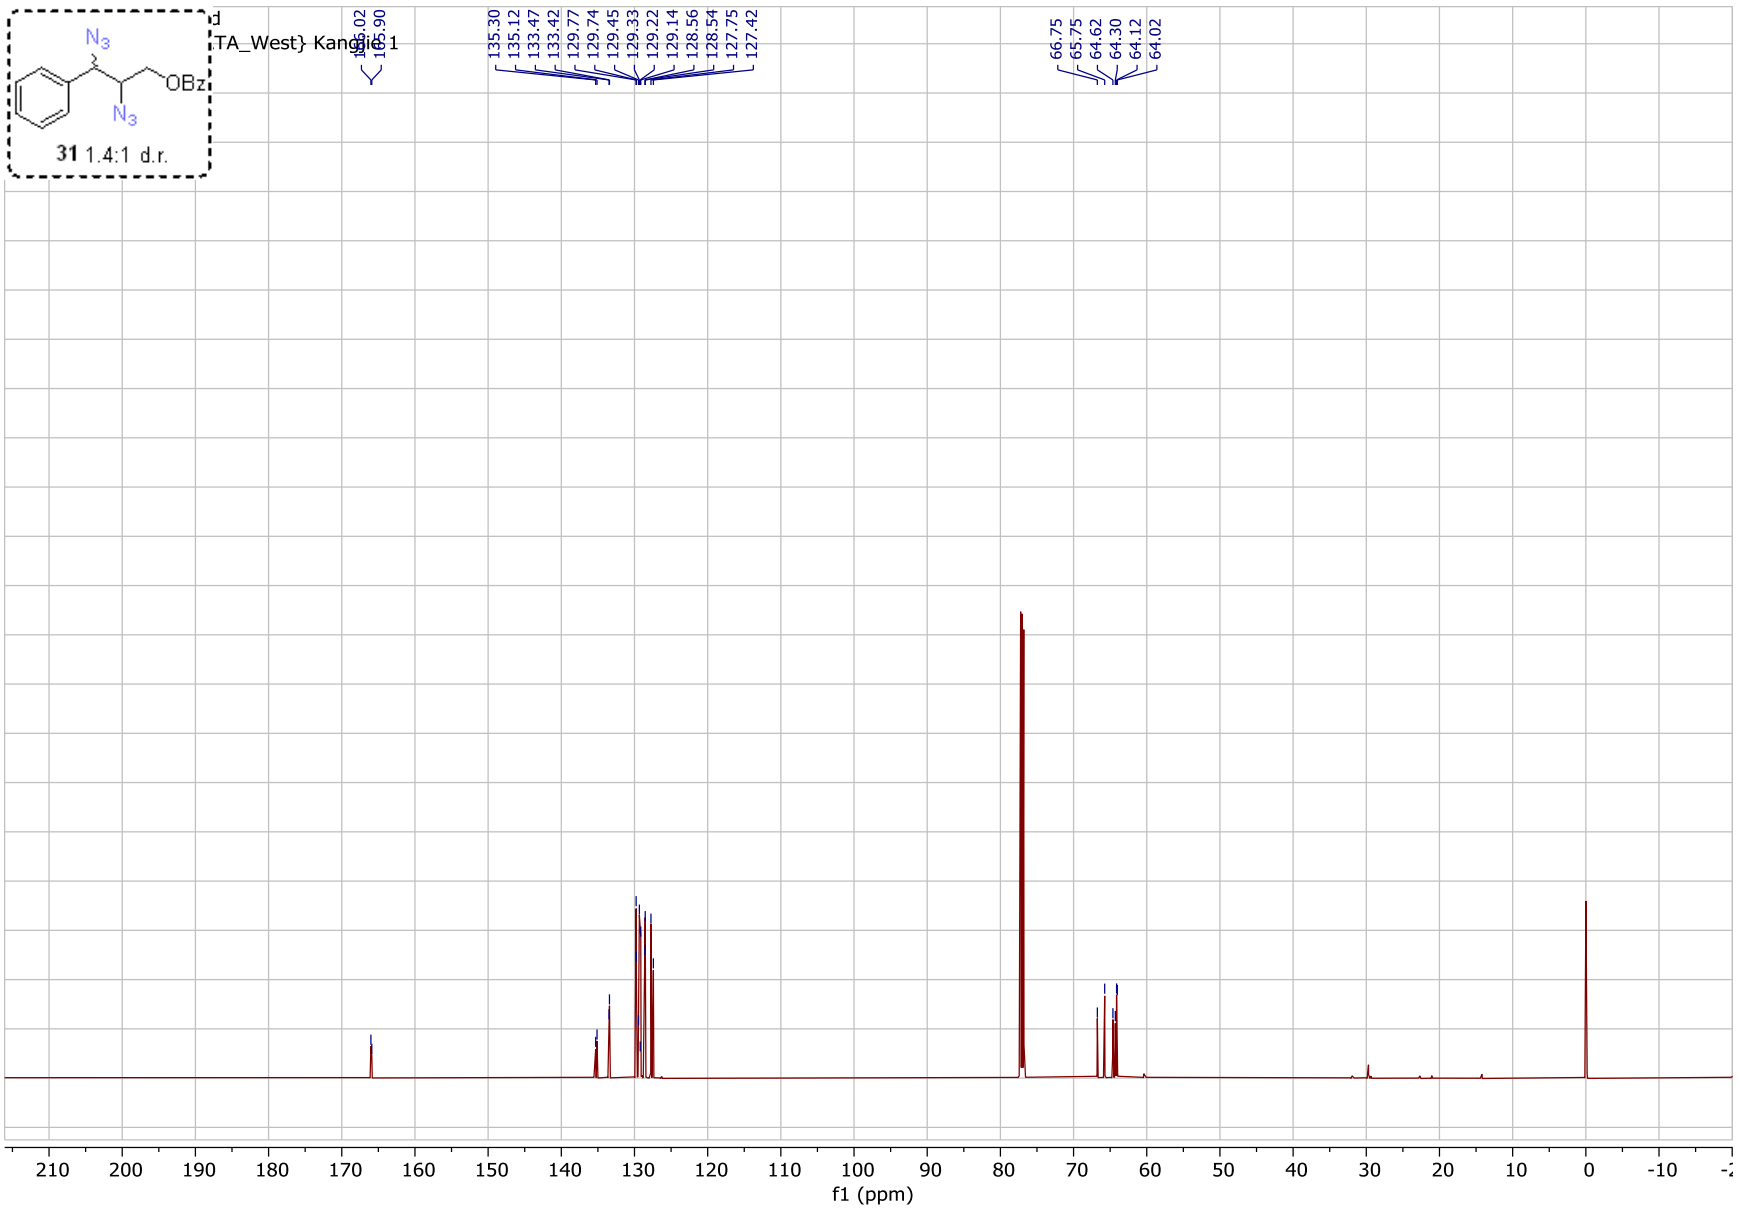

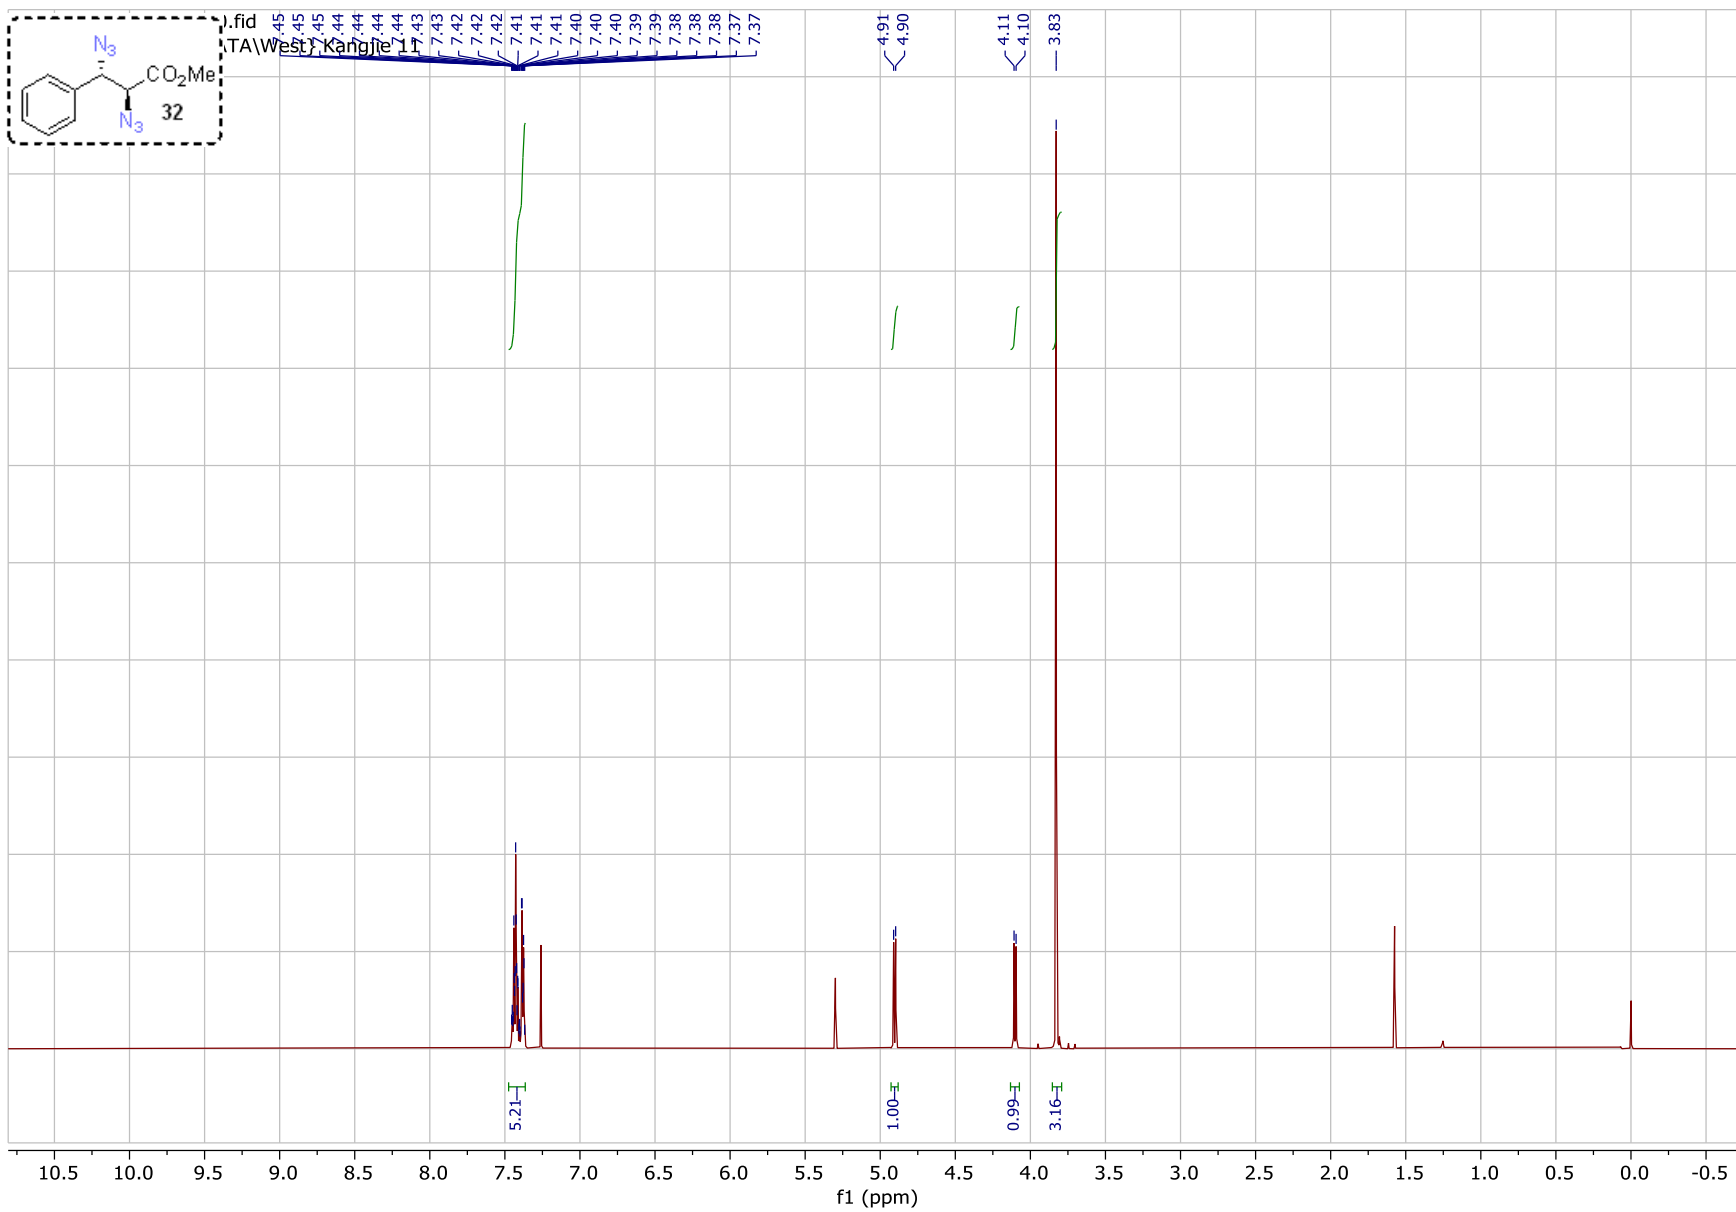

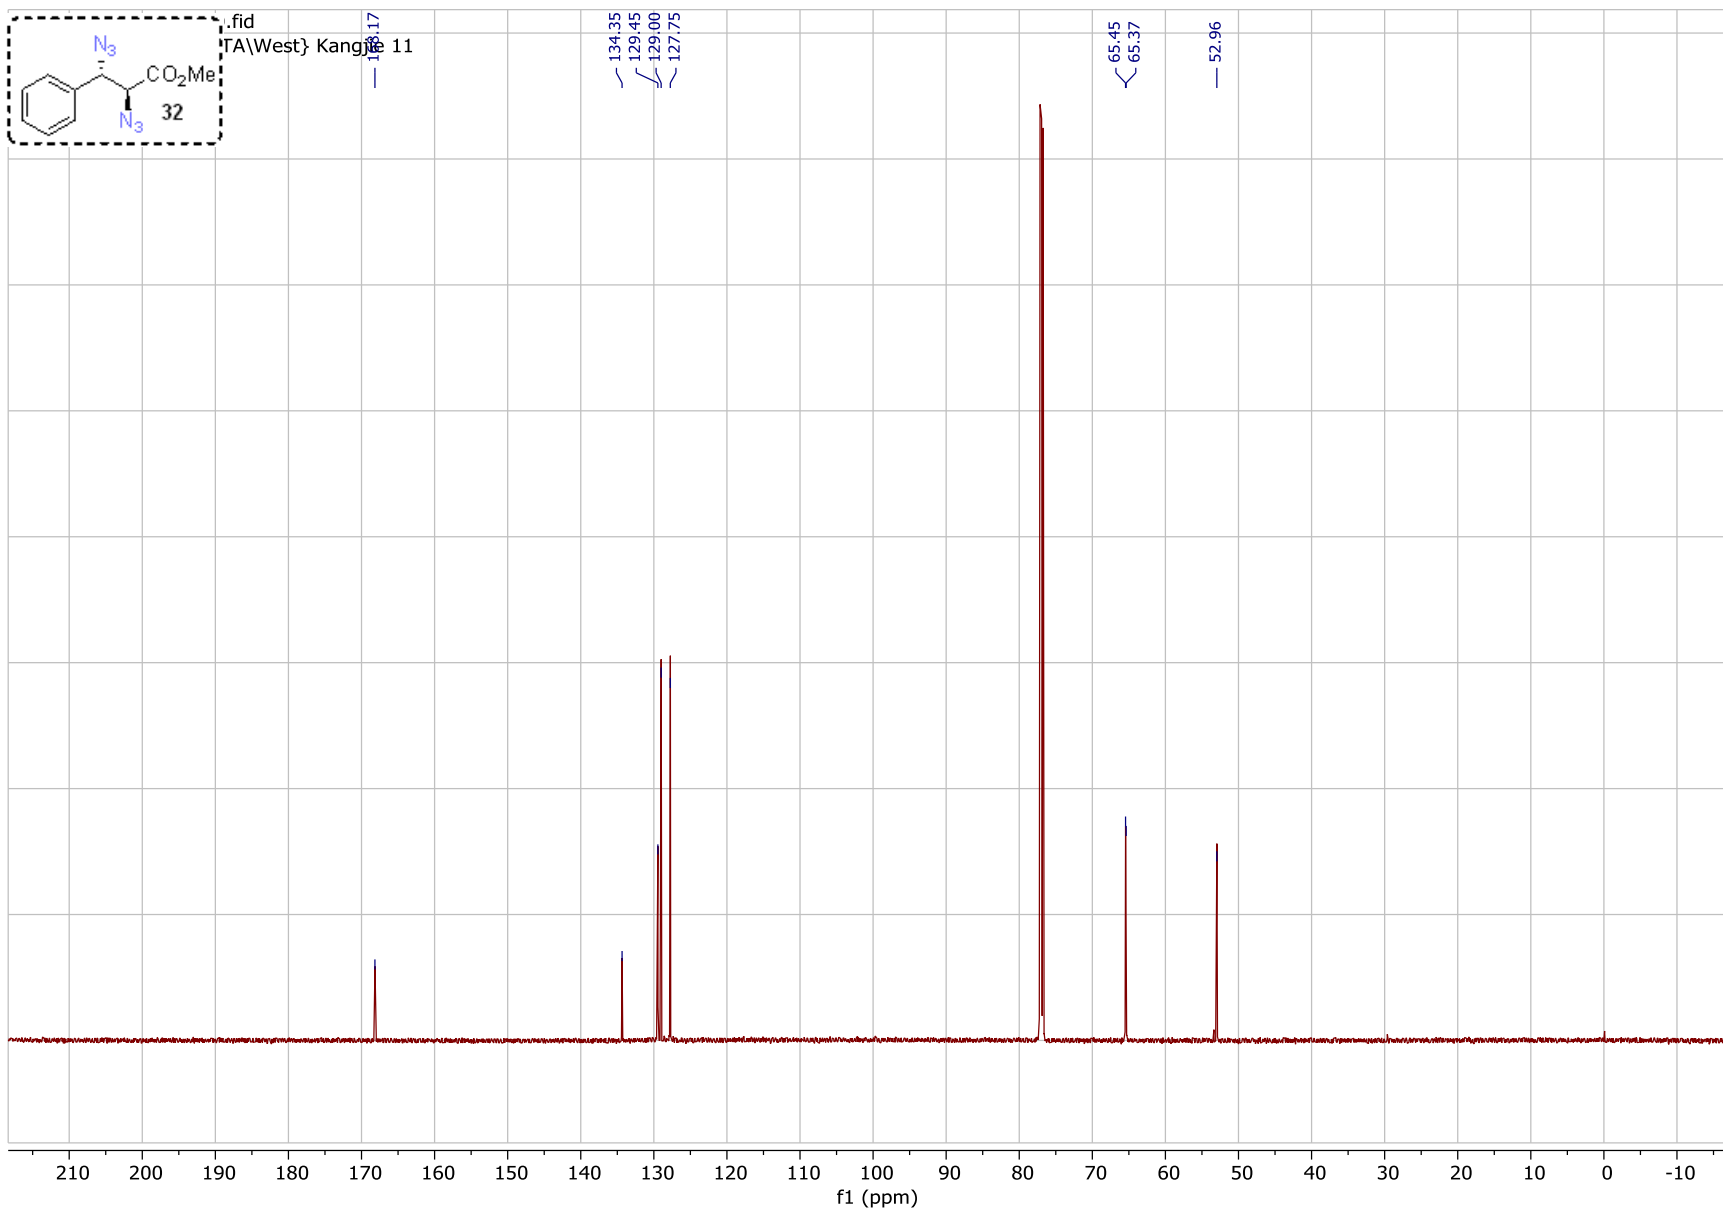

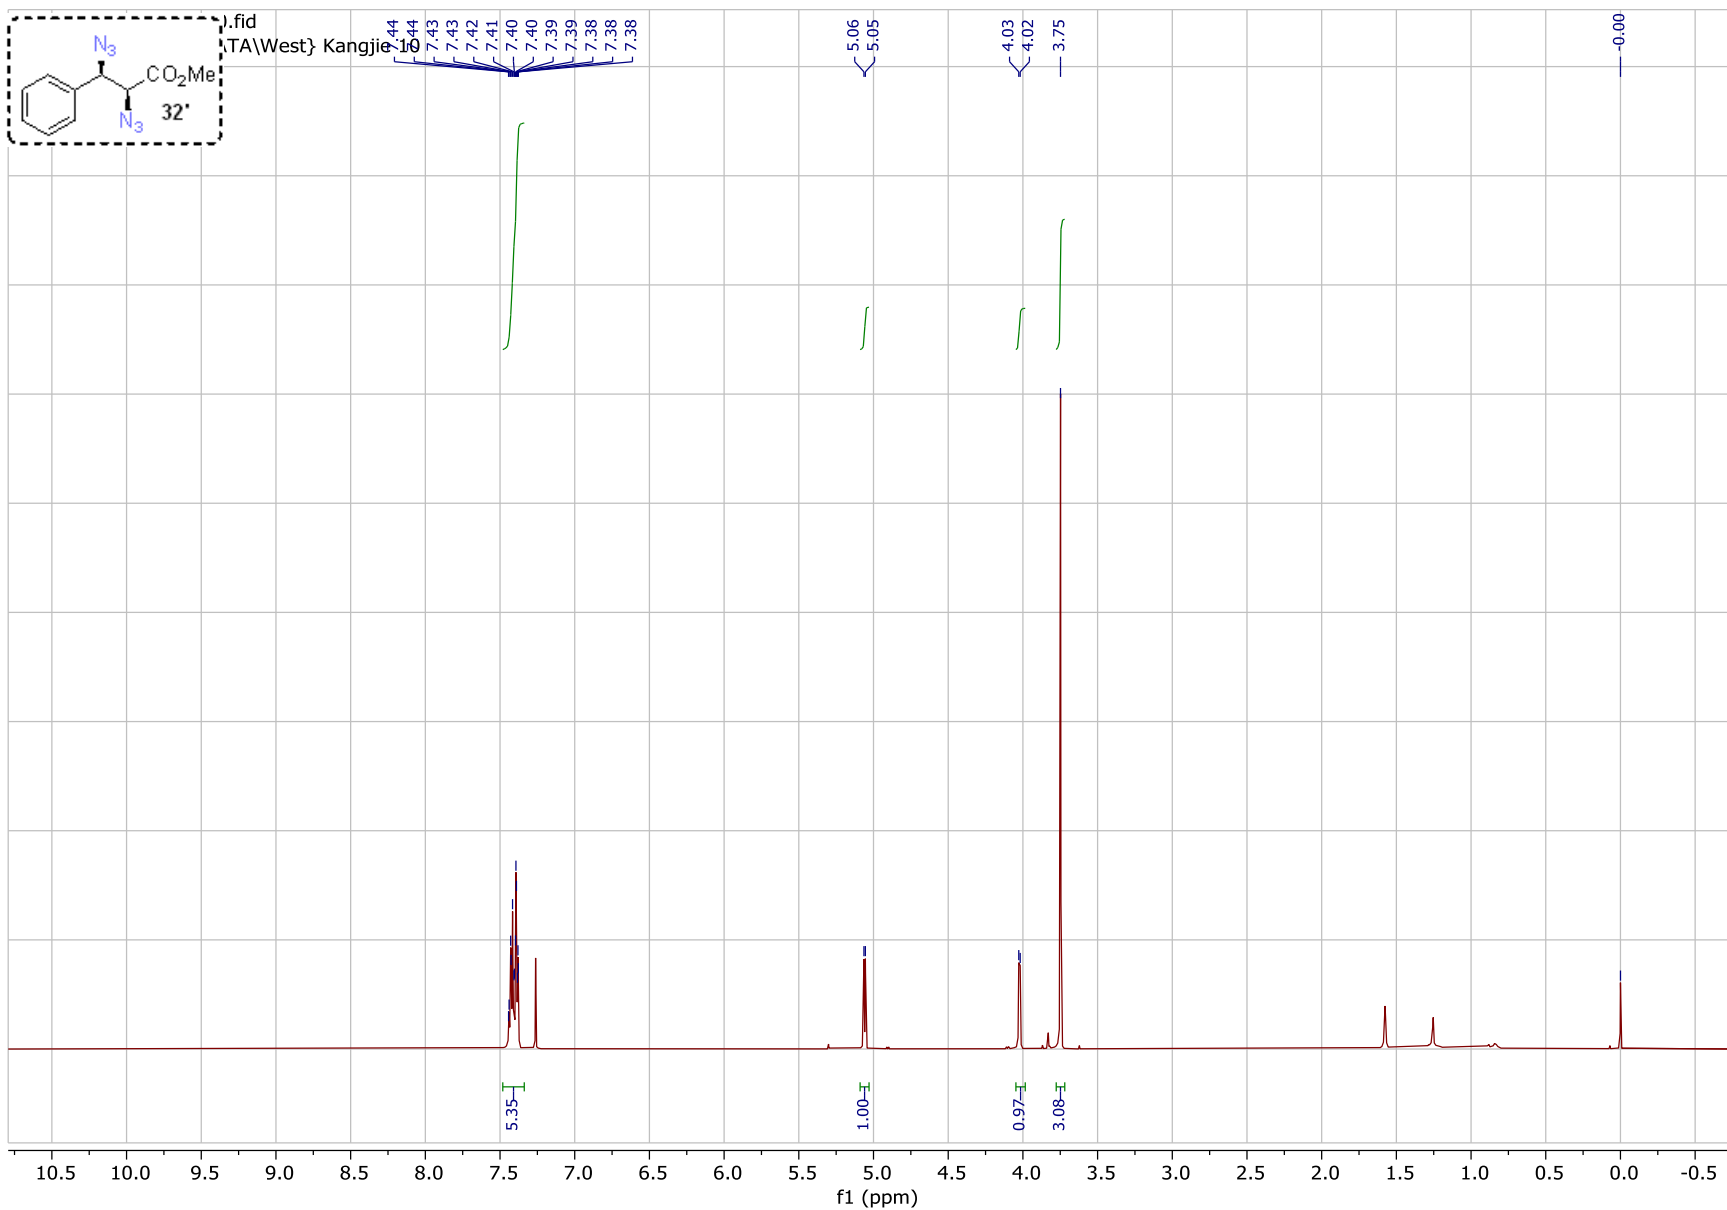

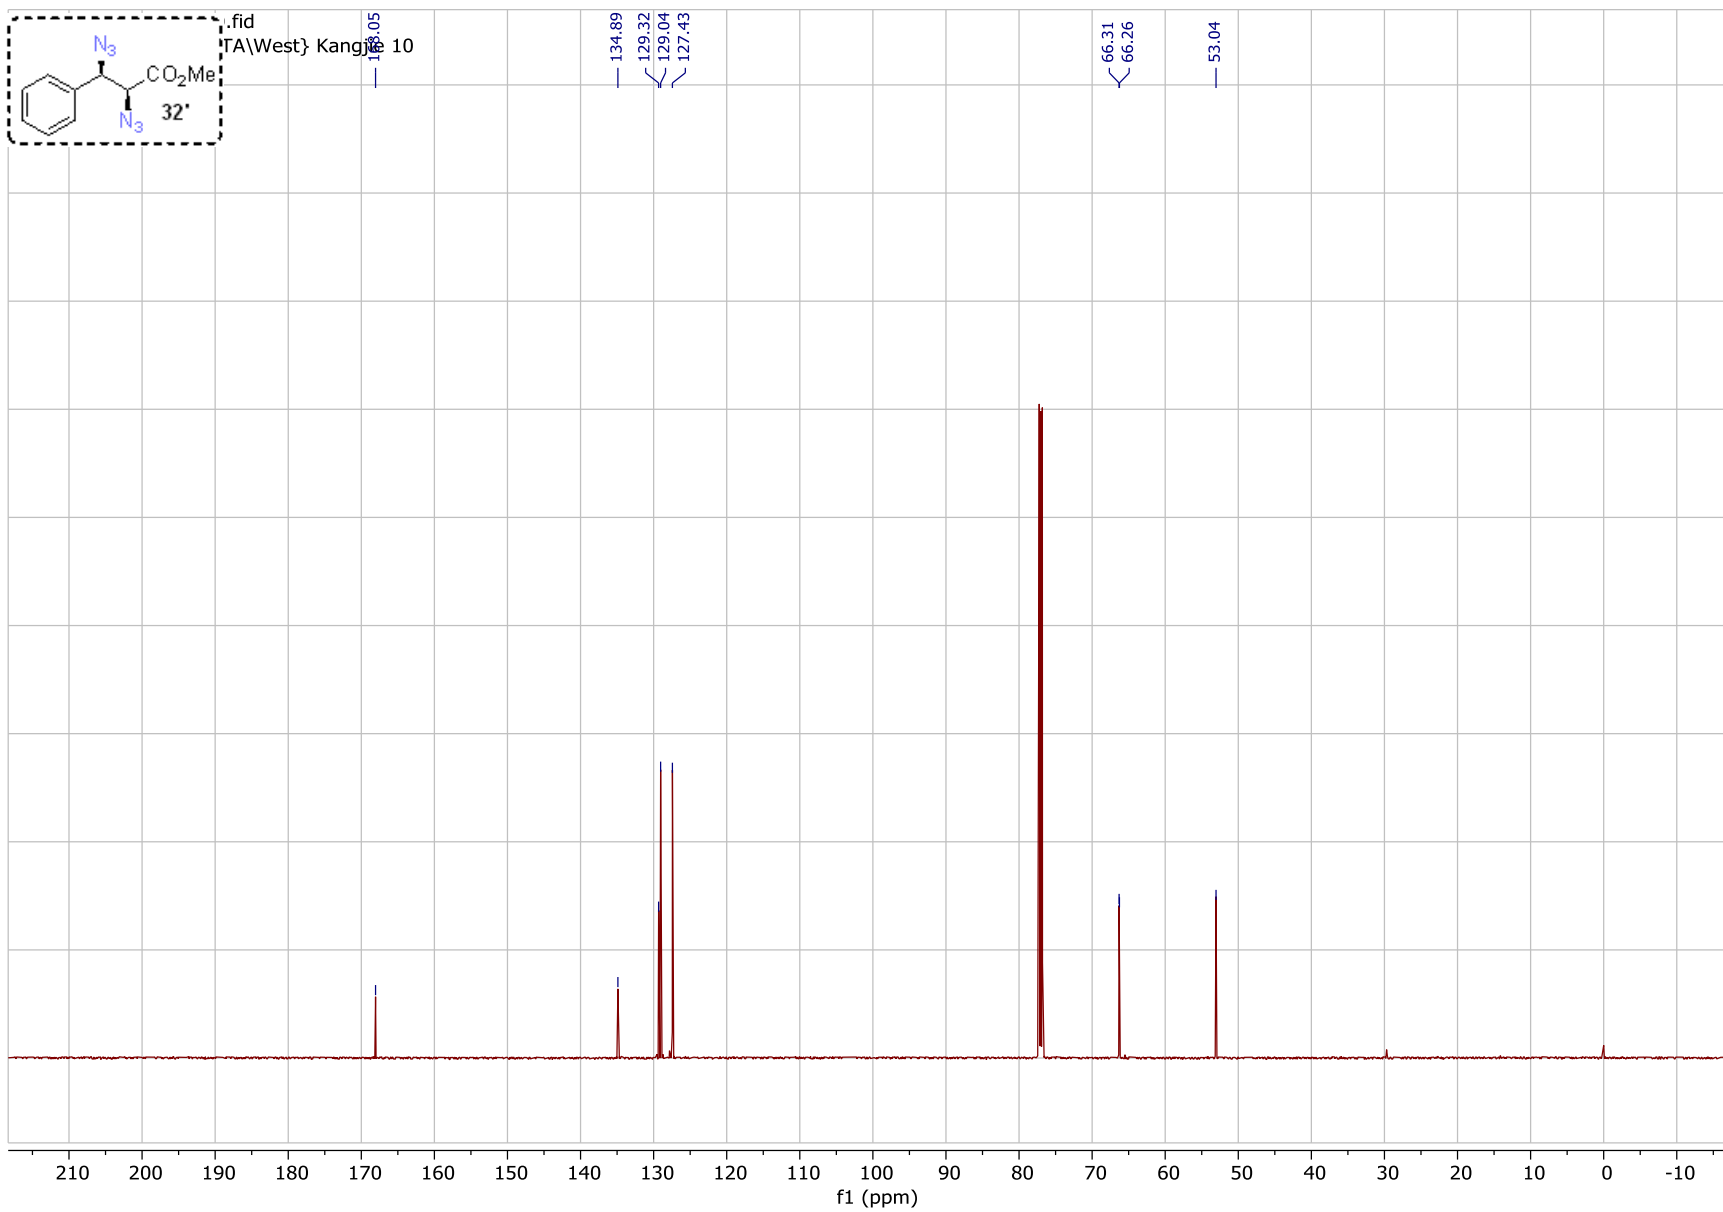

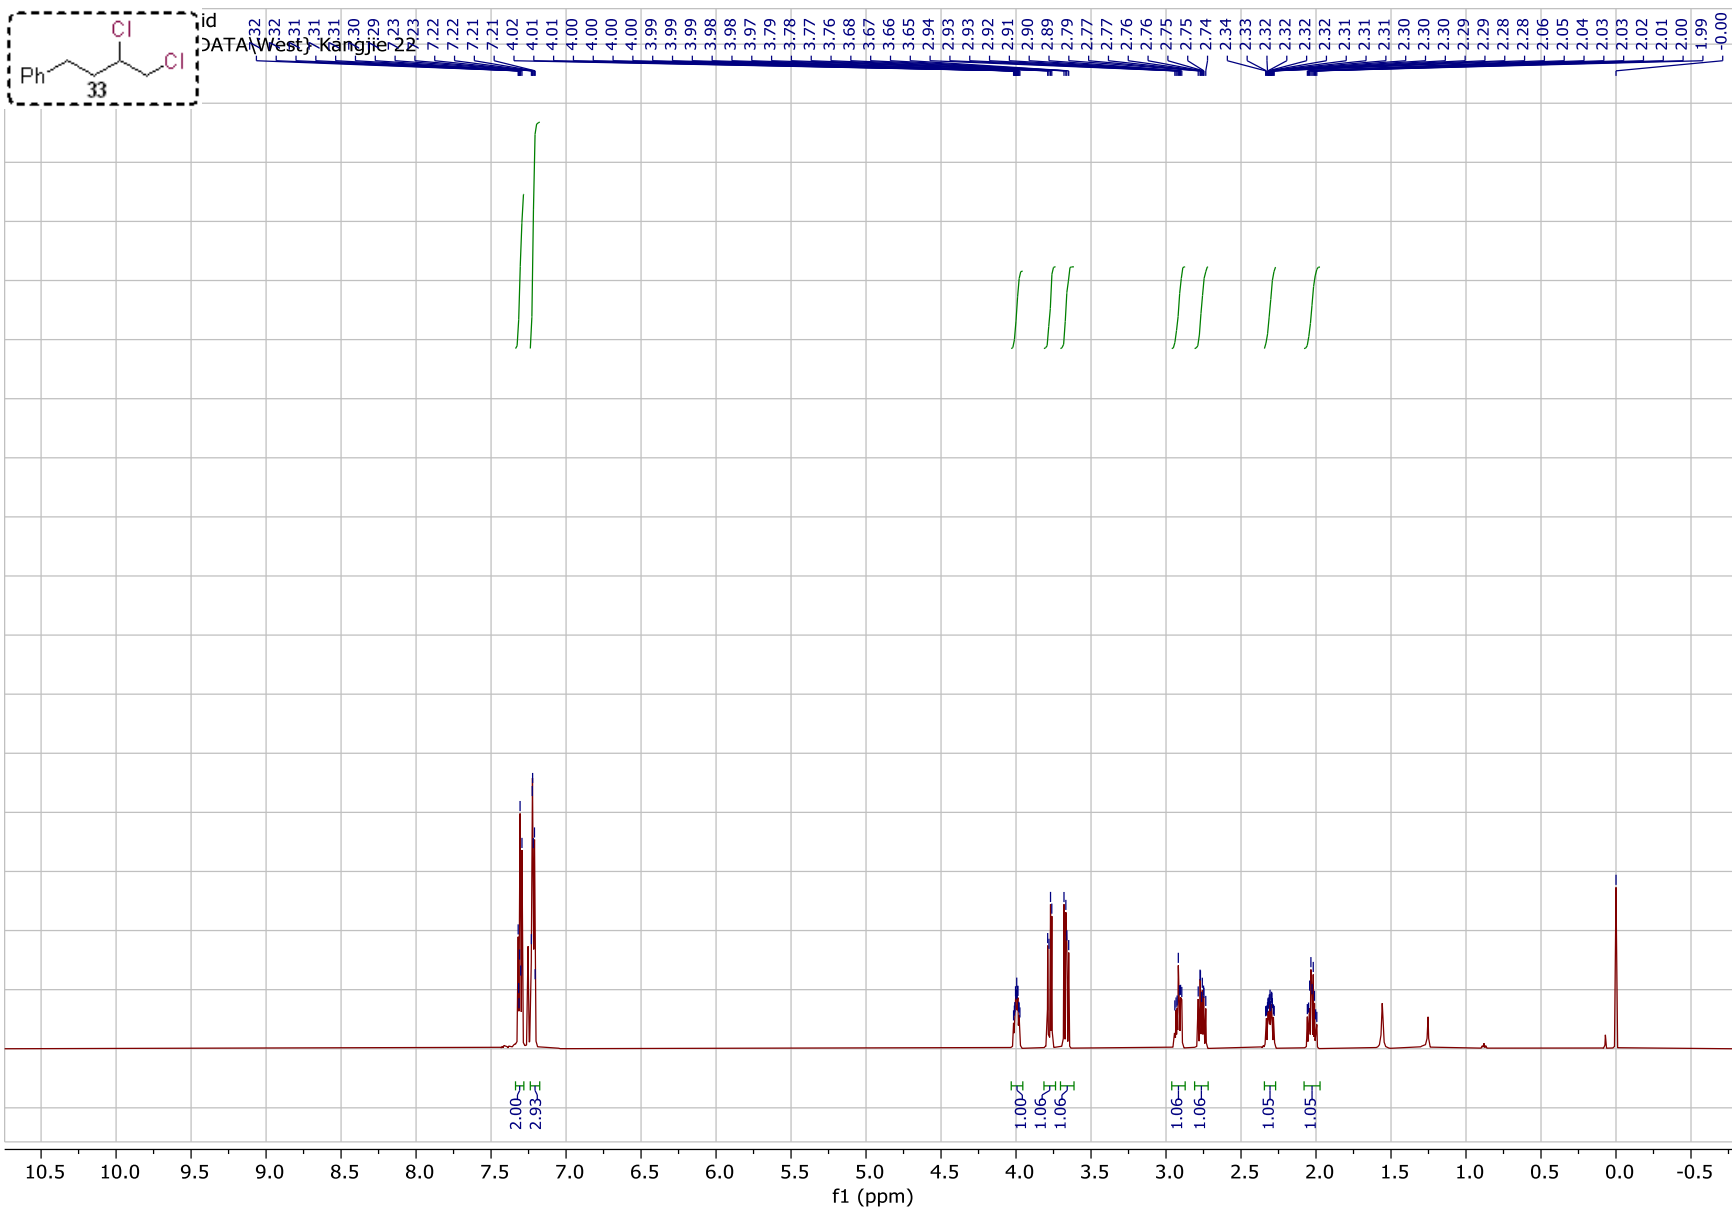

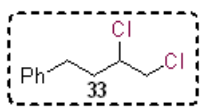

id  
ATA\West\ Kangjie 22

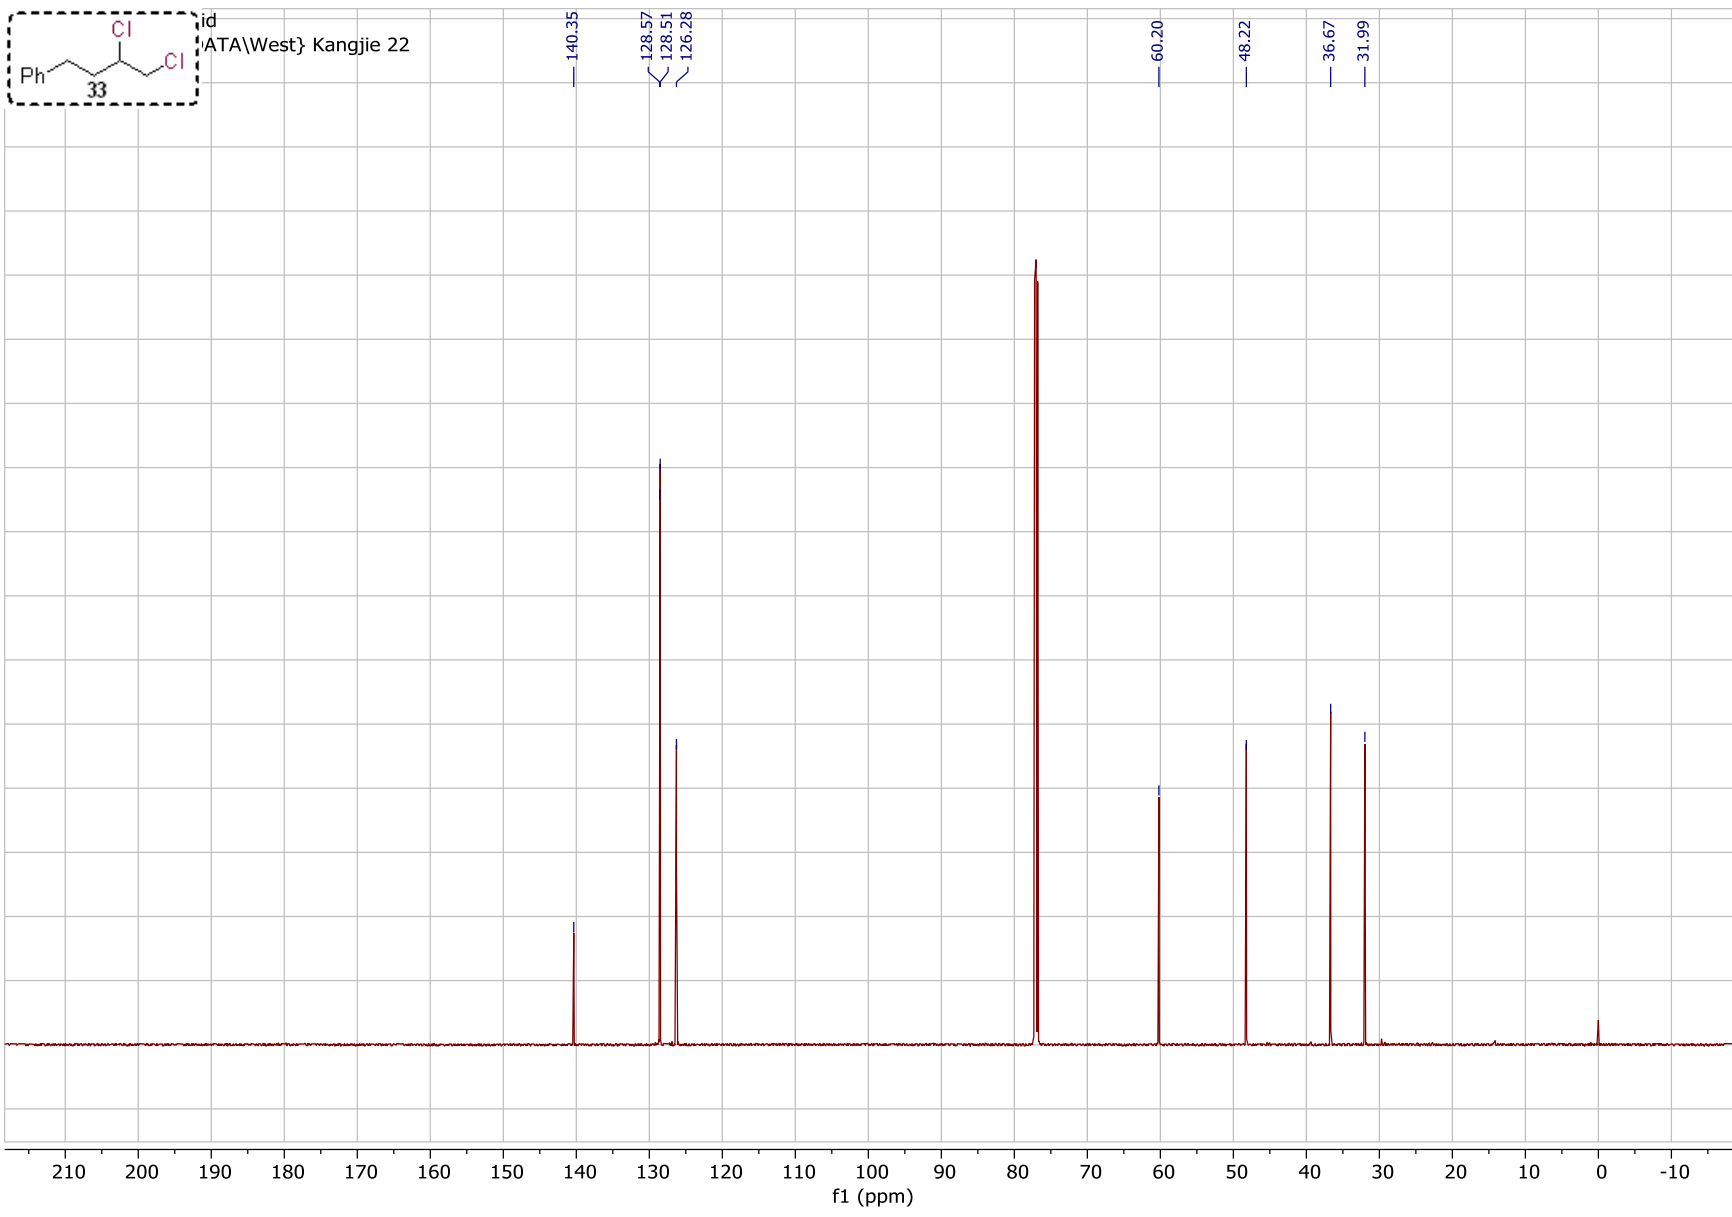

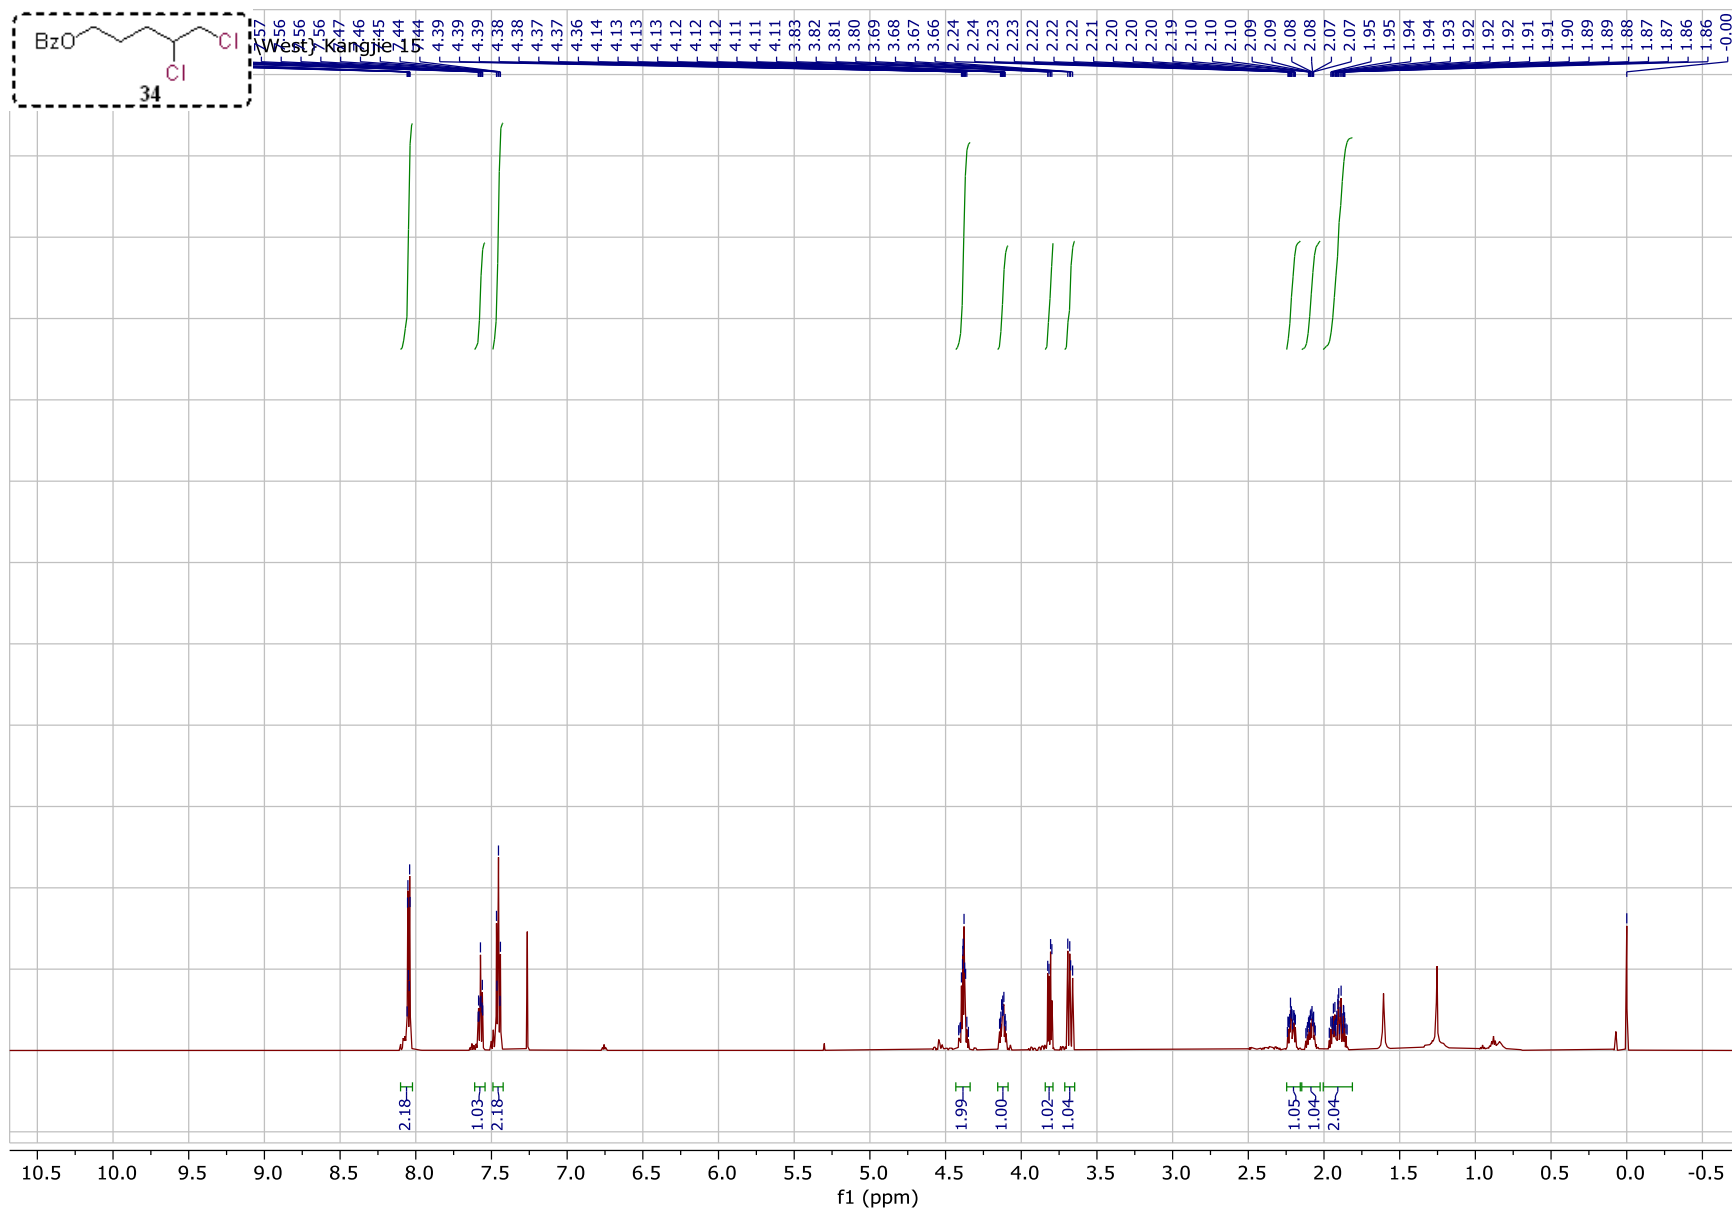



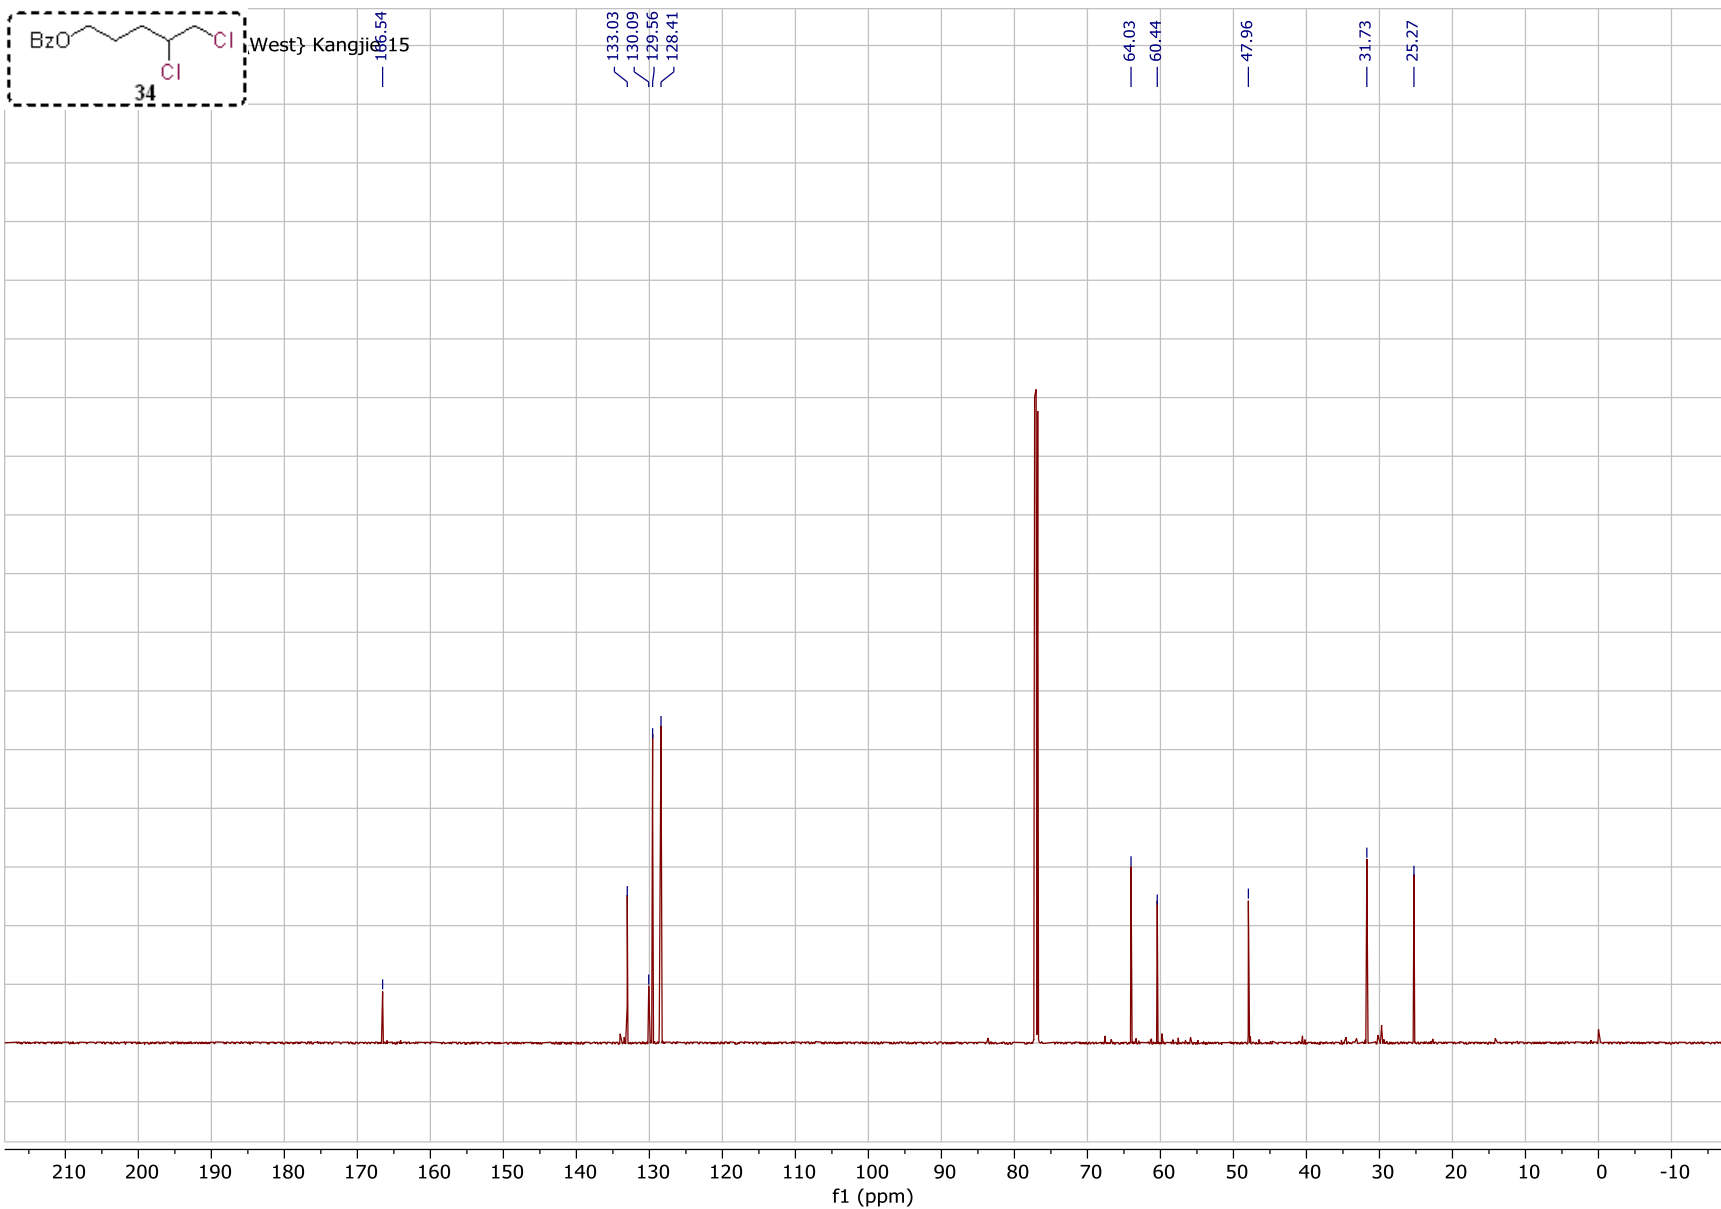



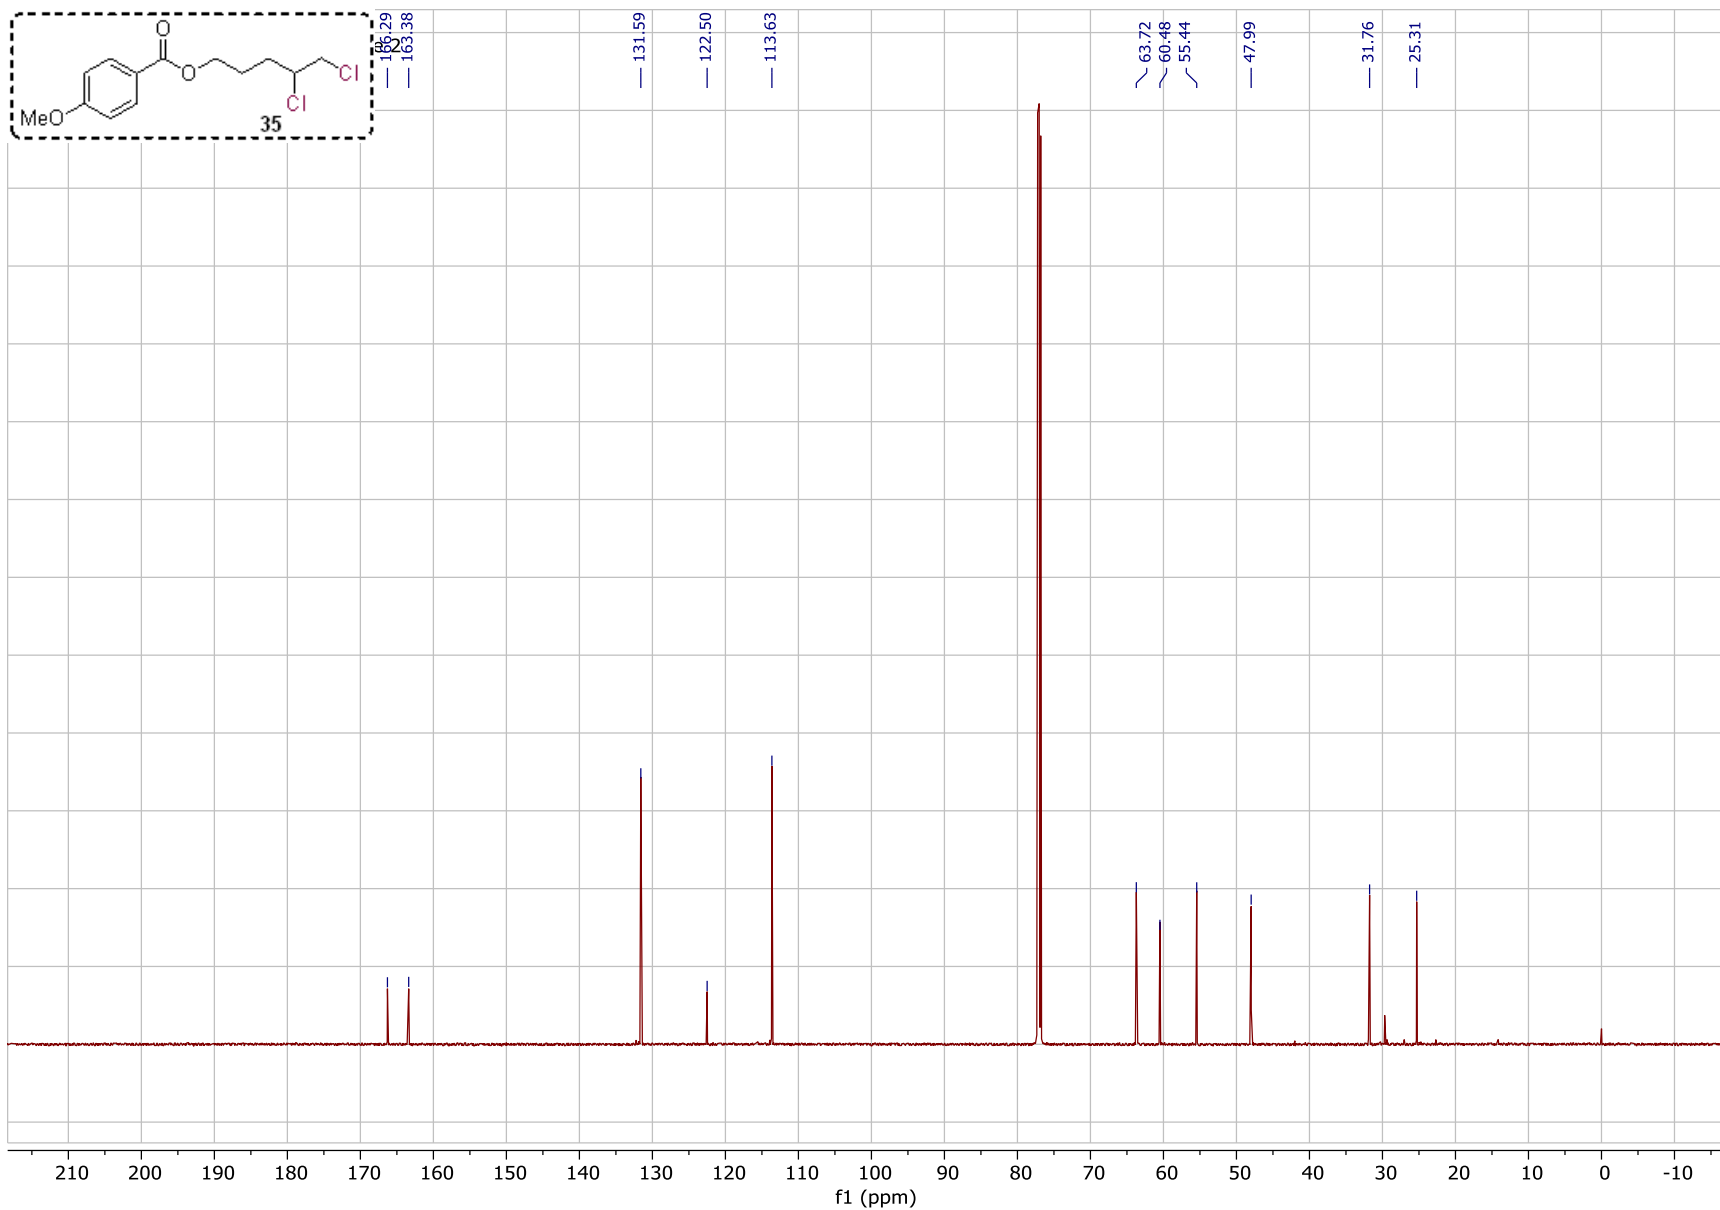

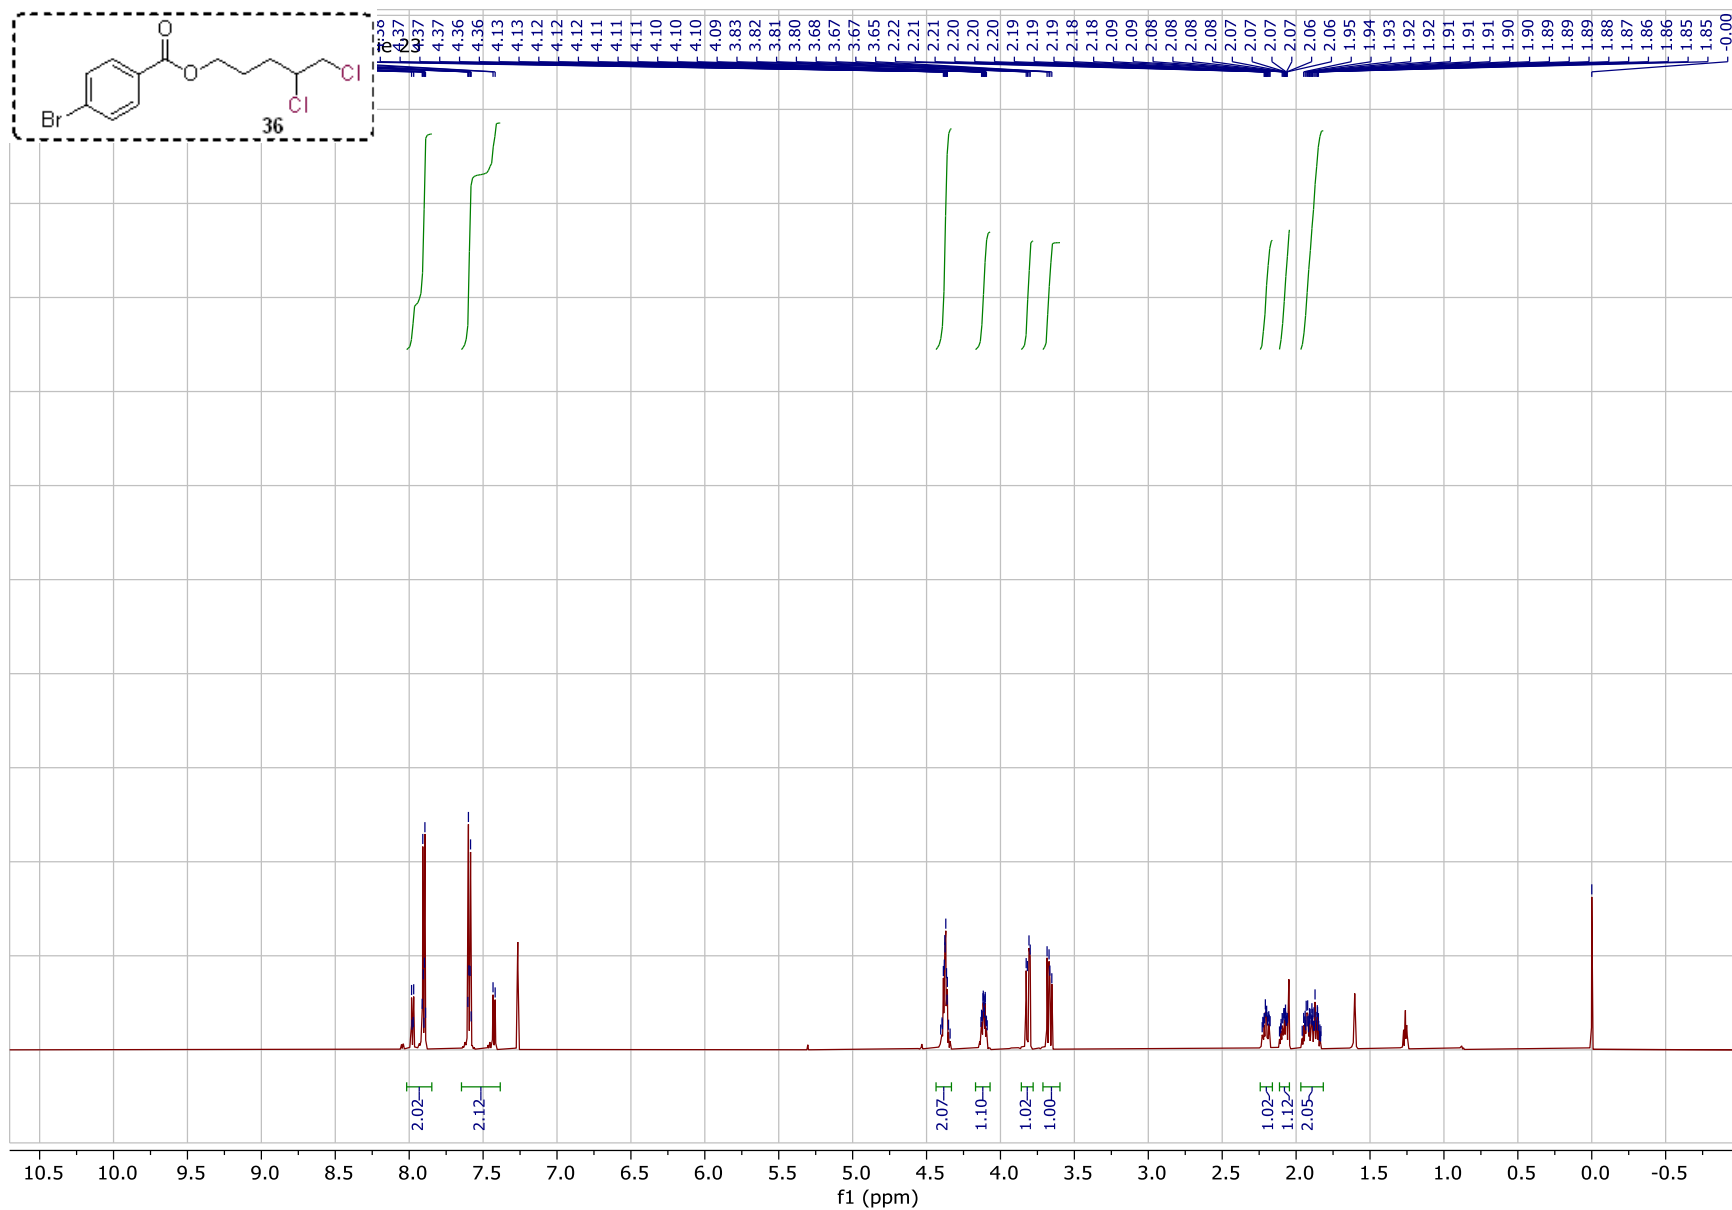

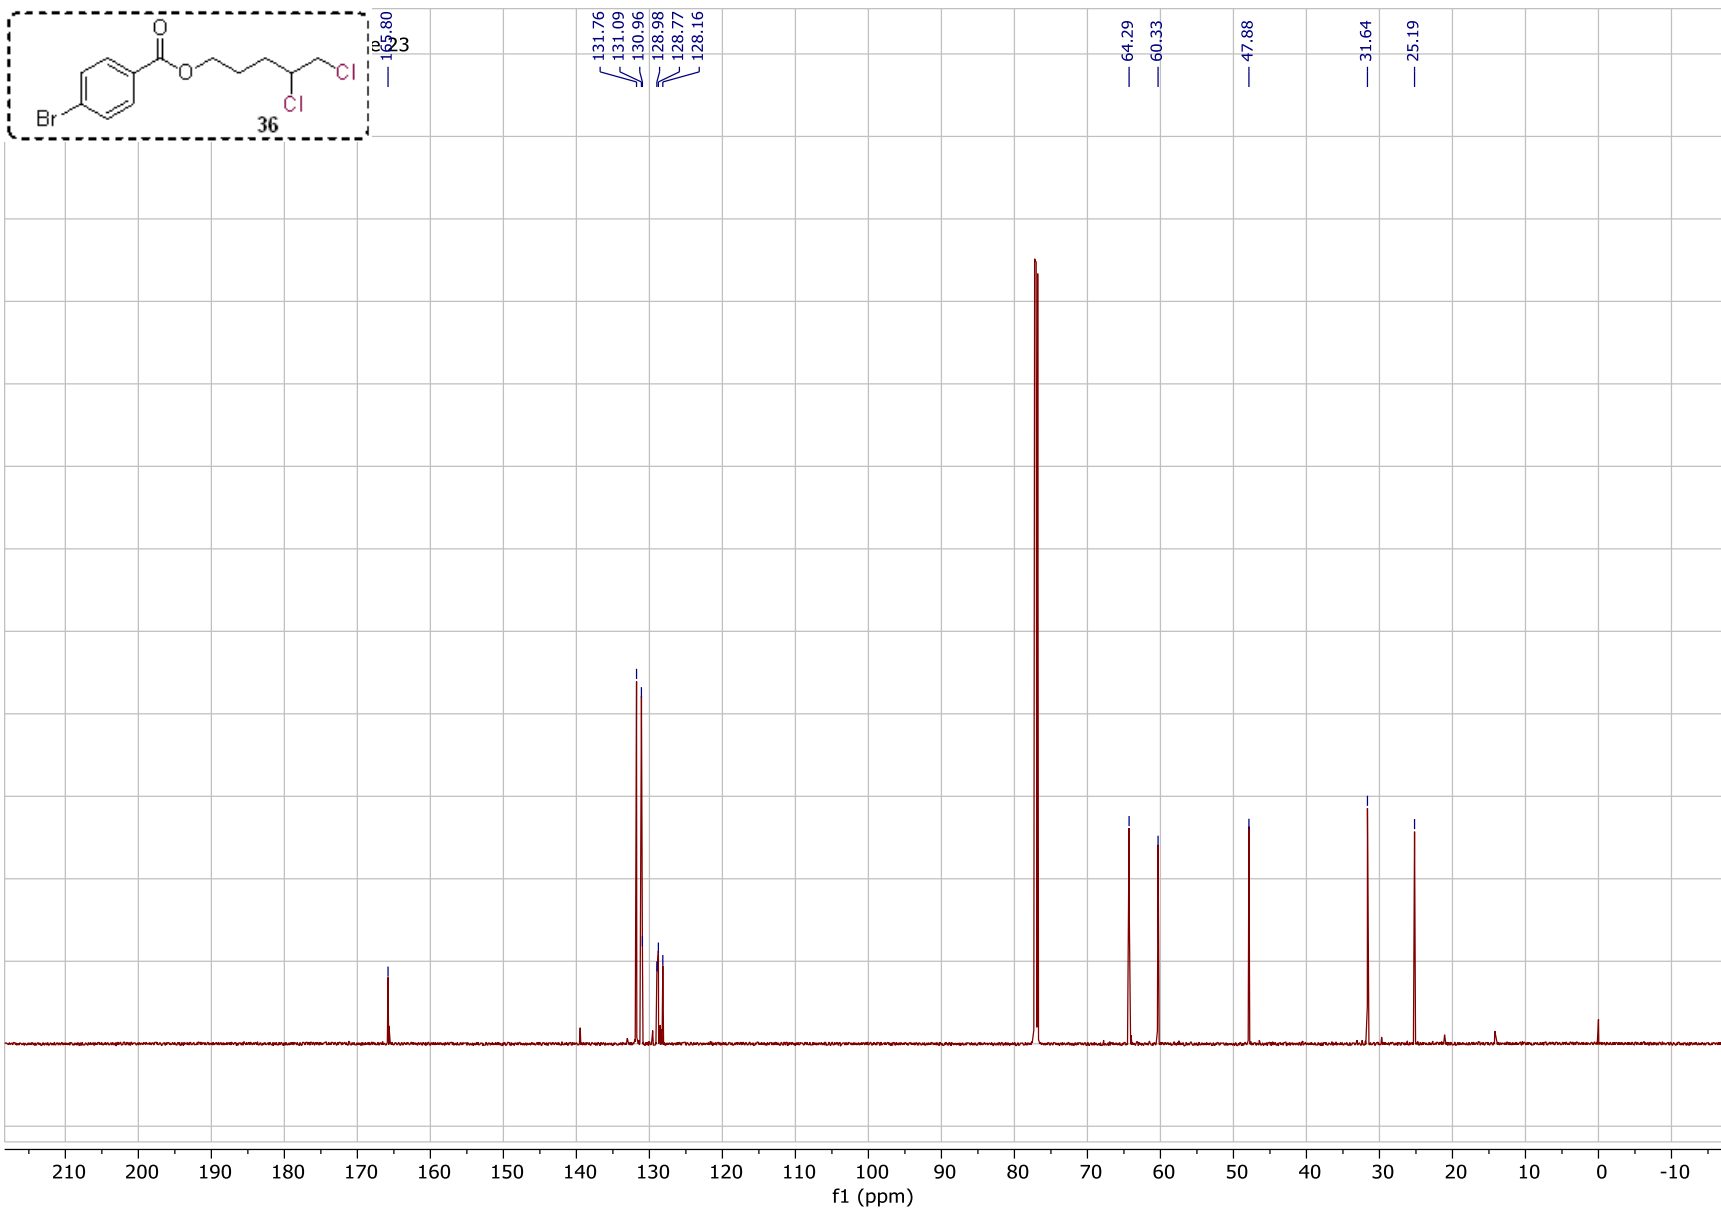

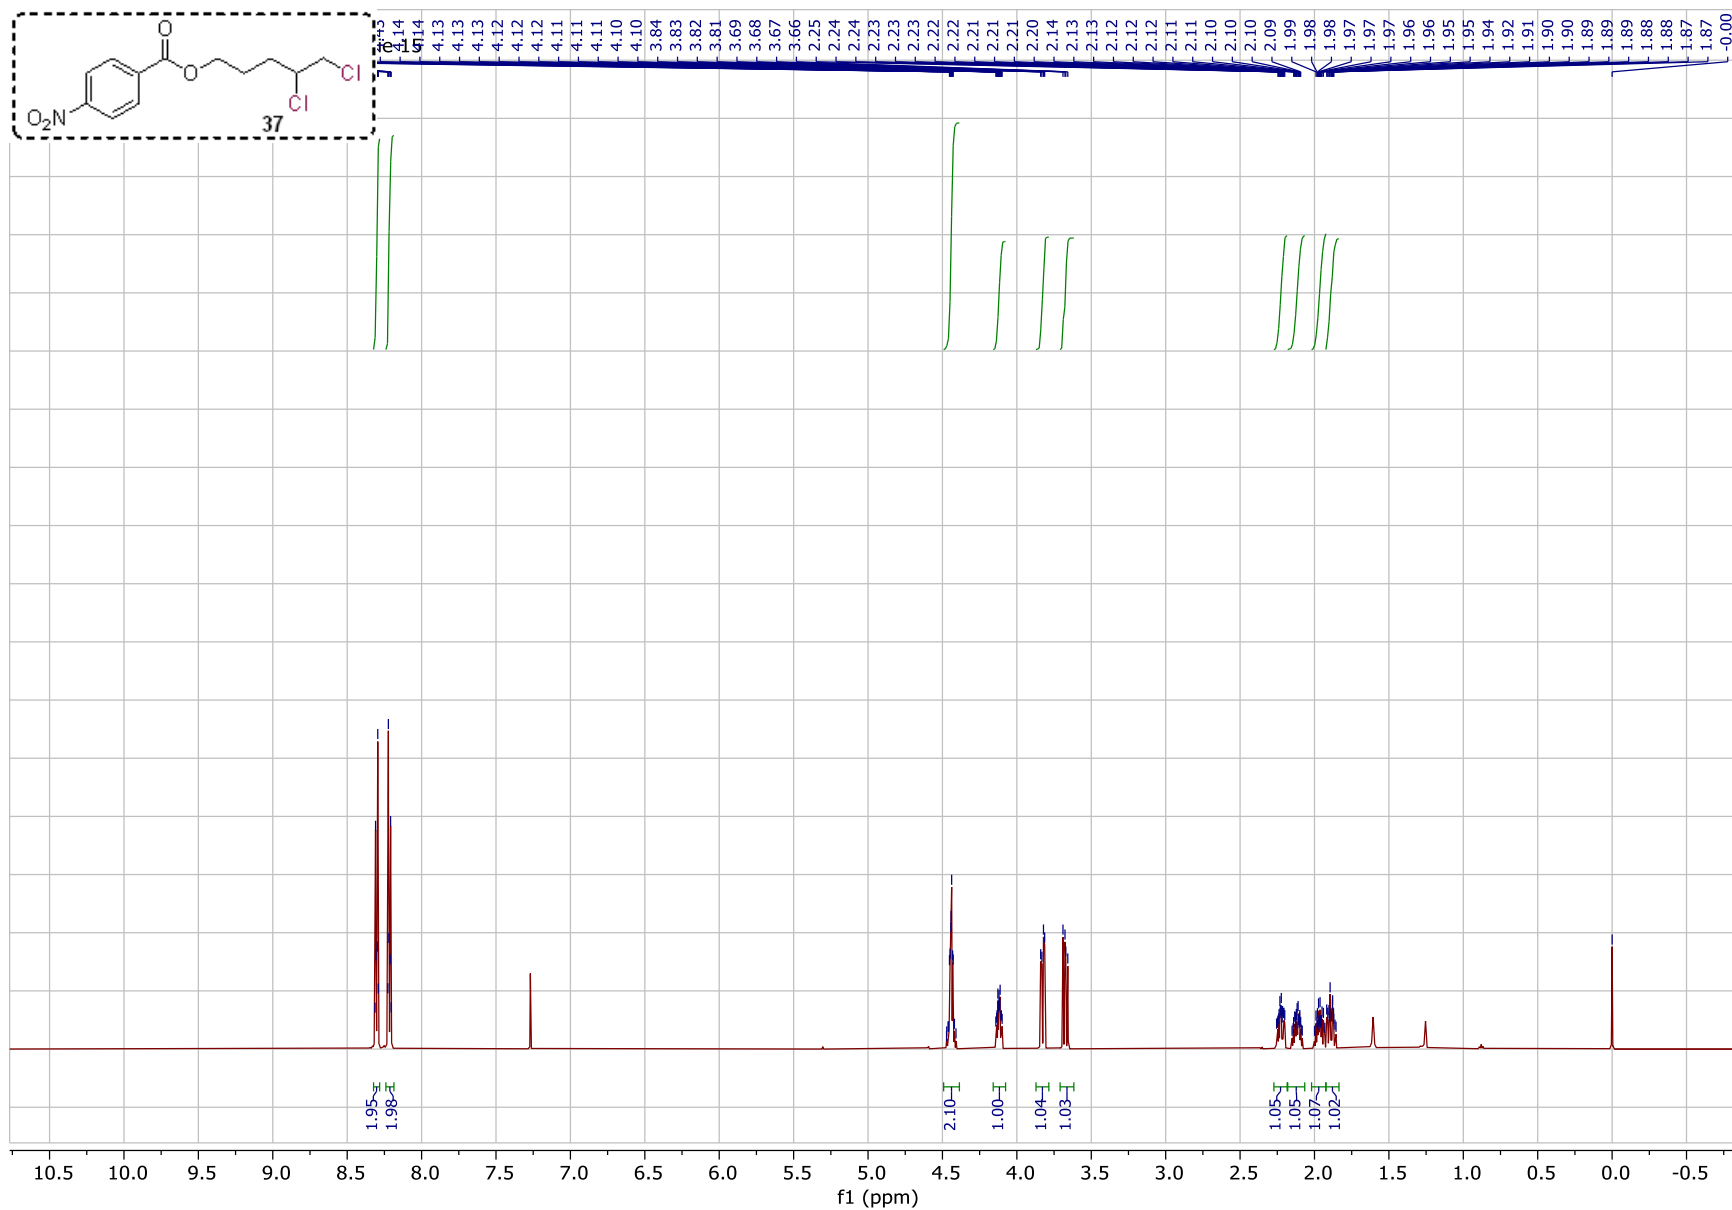

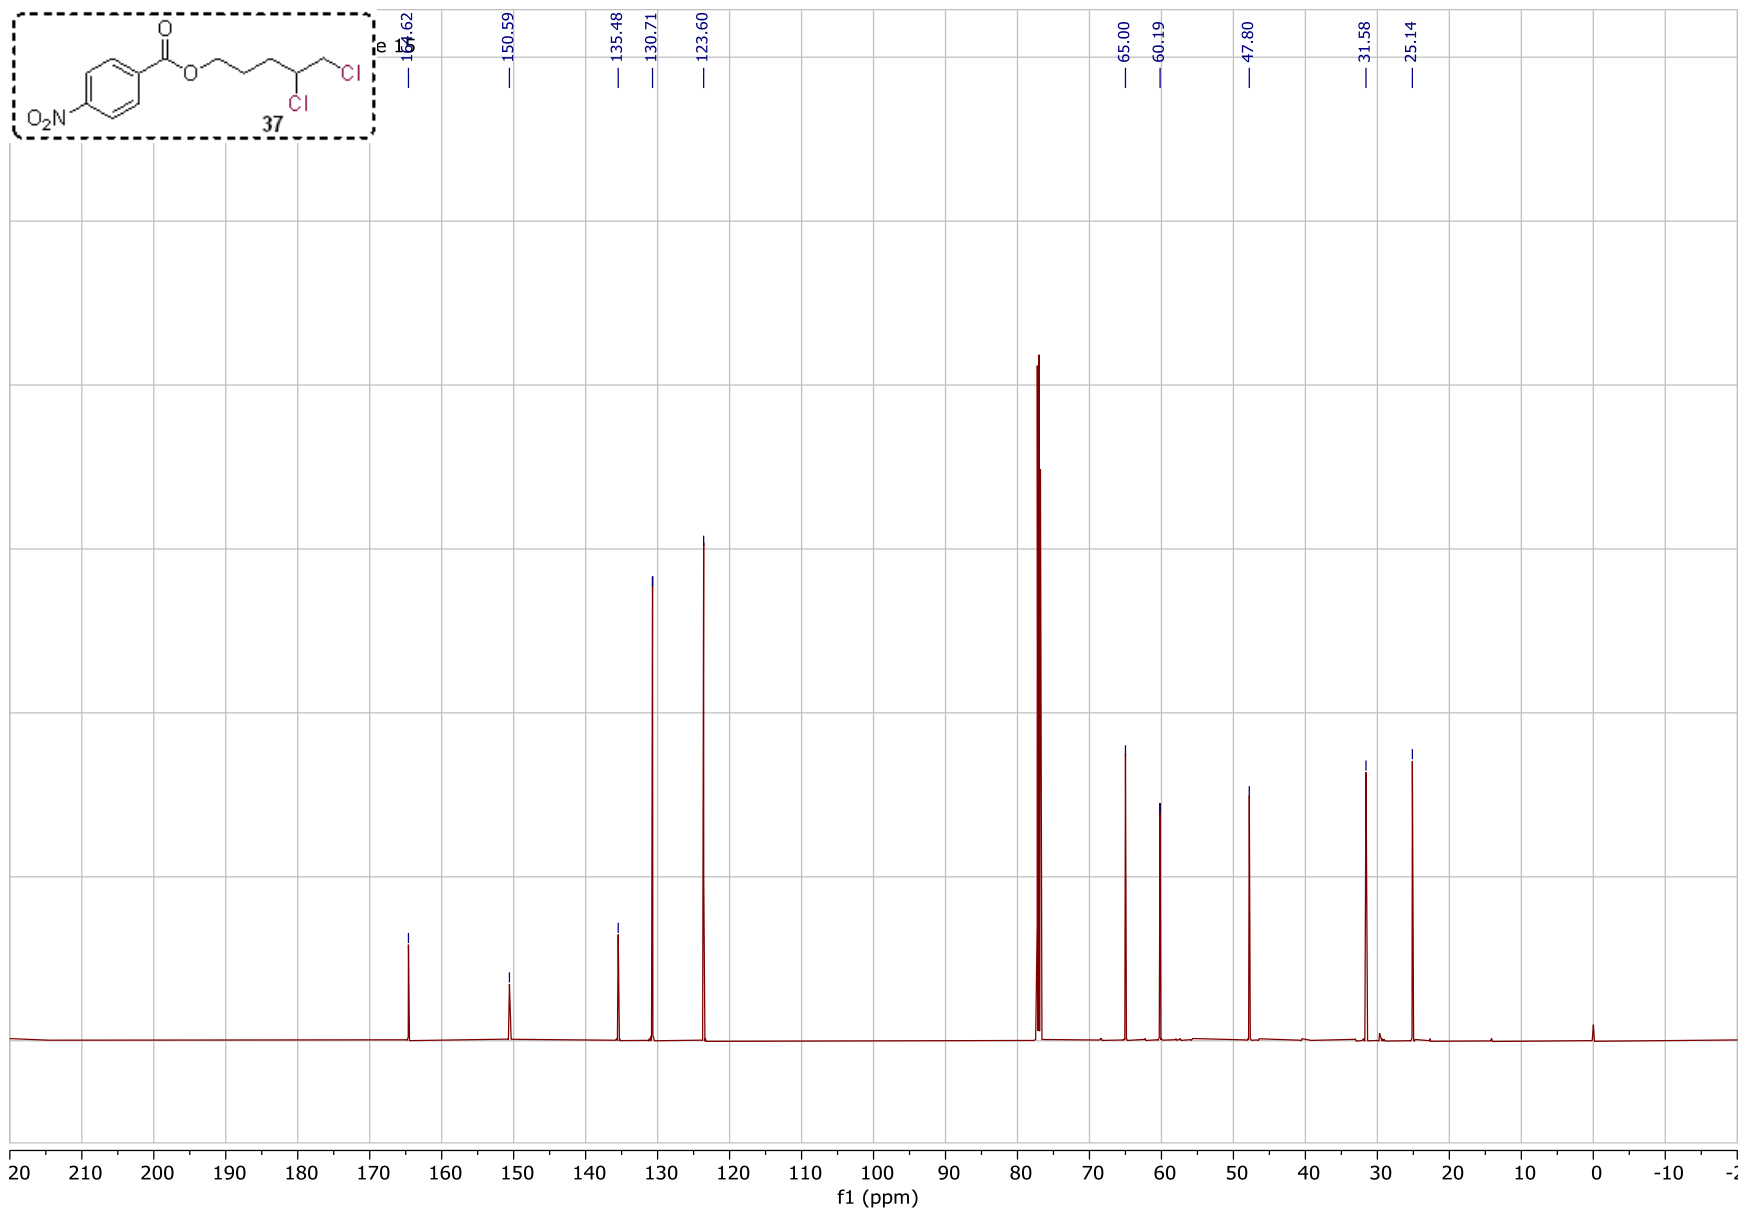

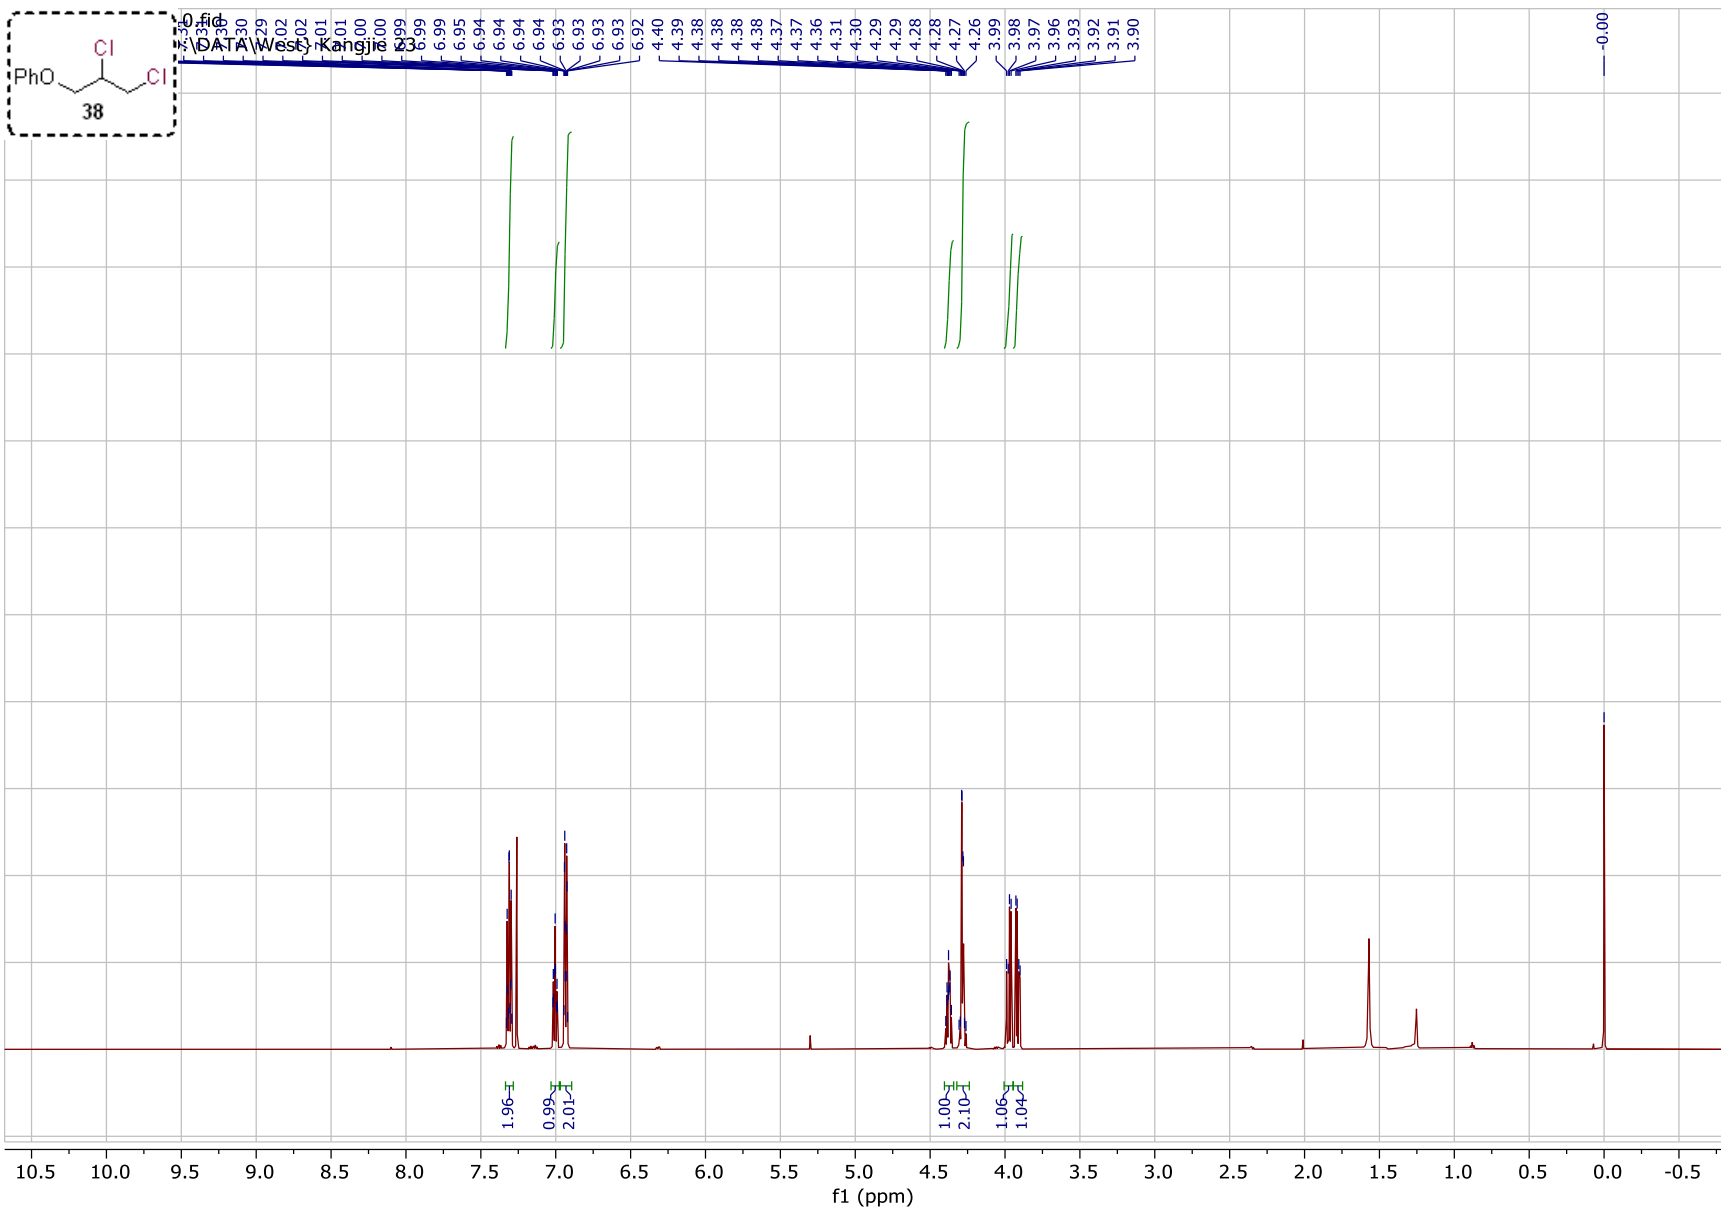



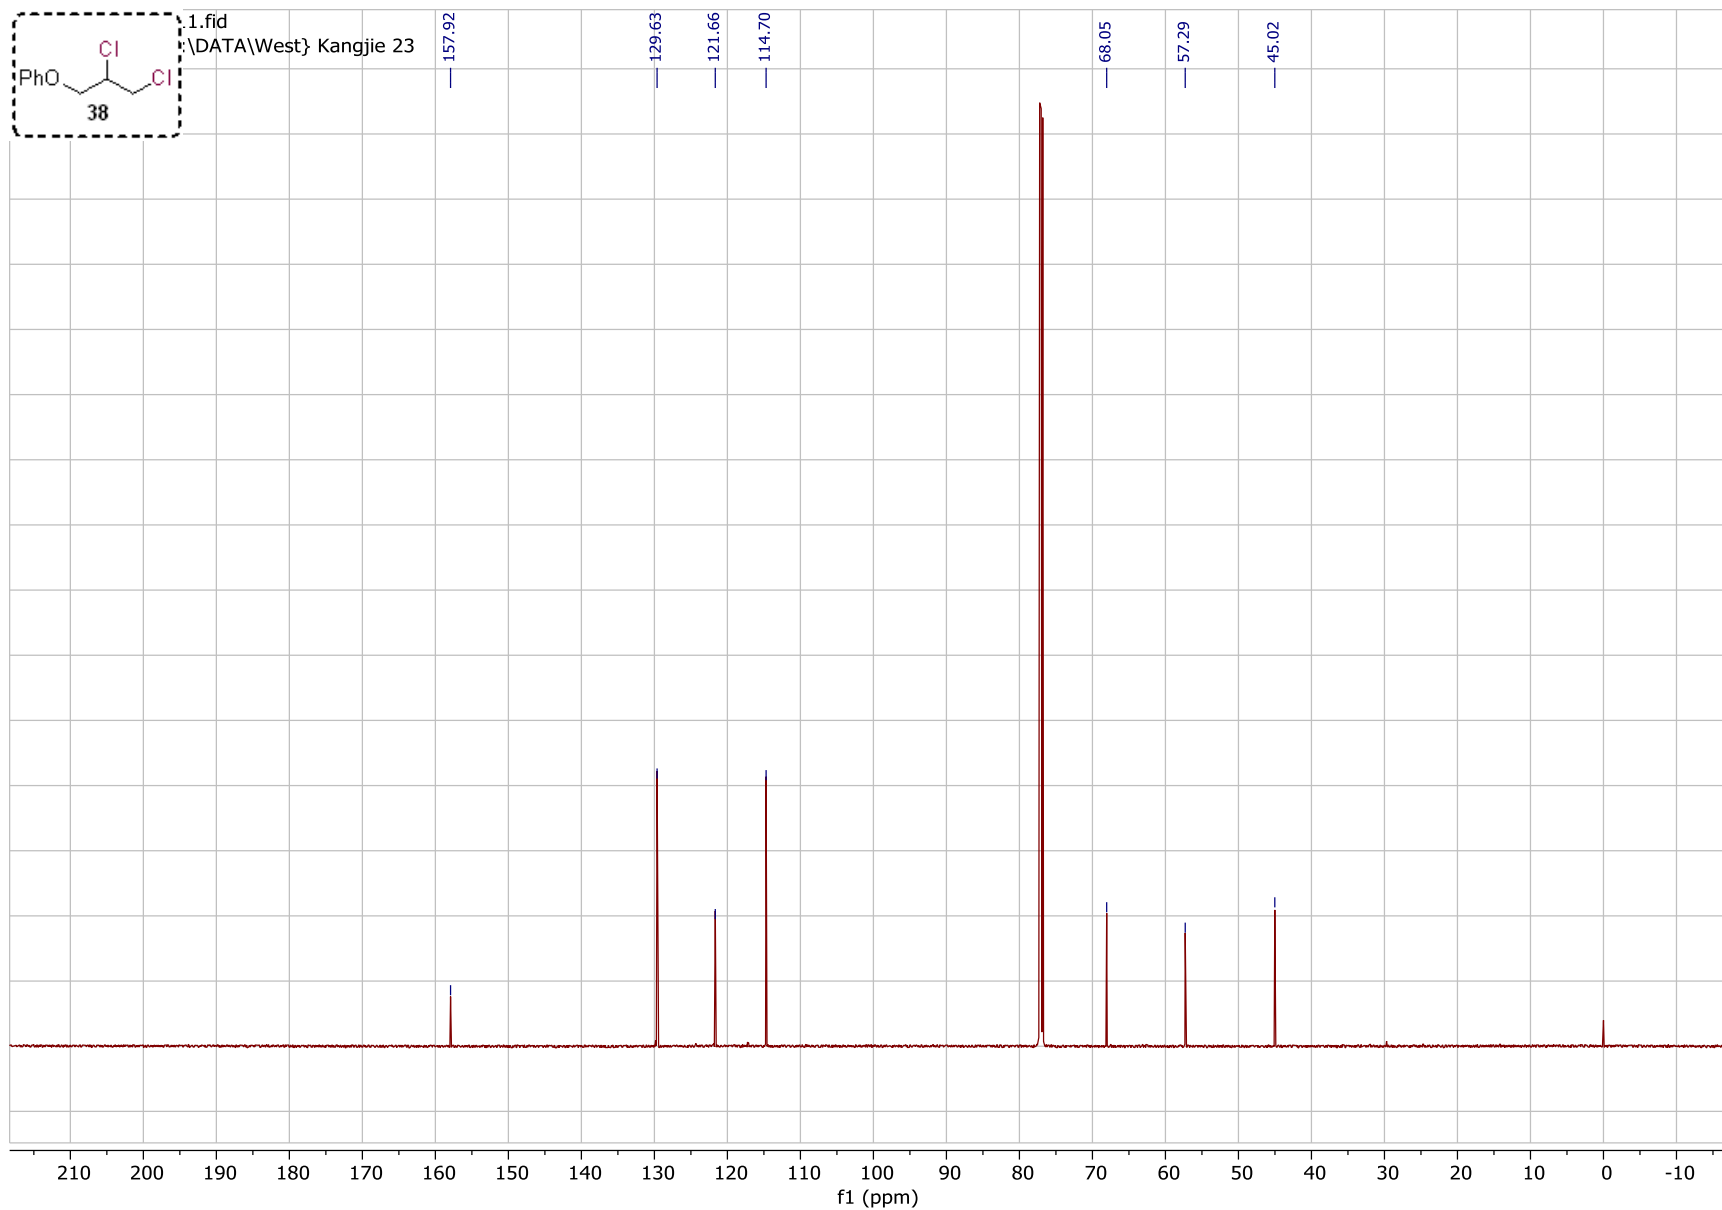

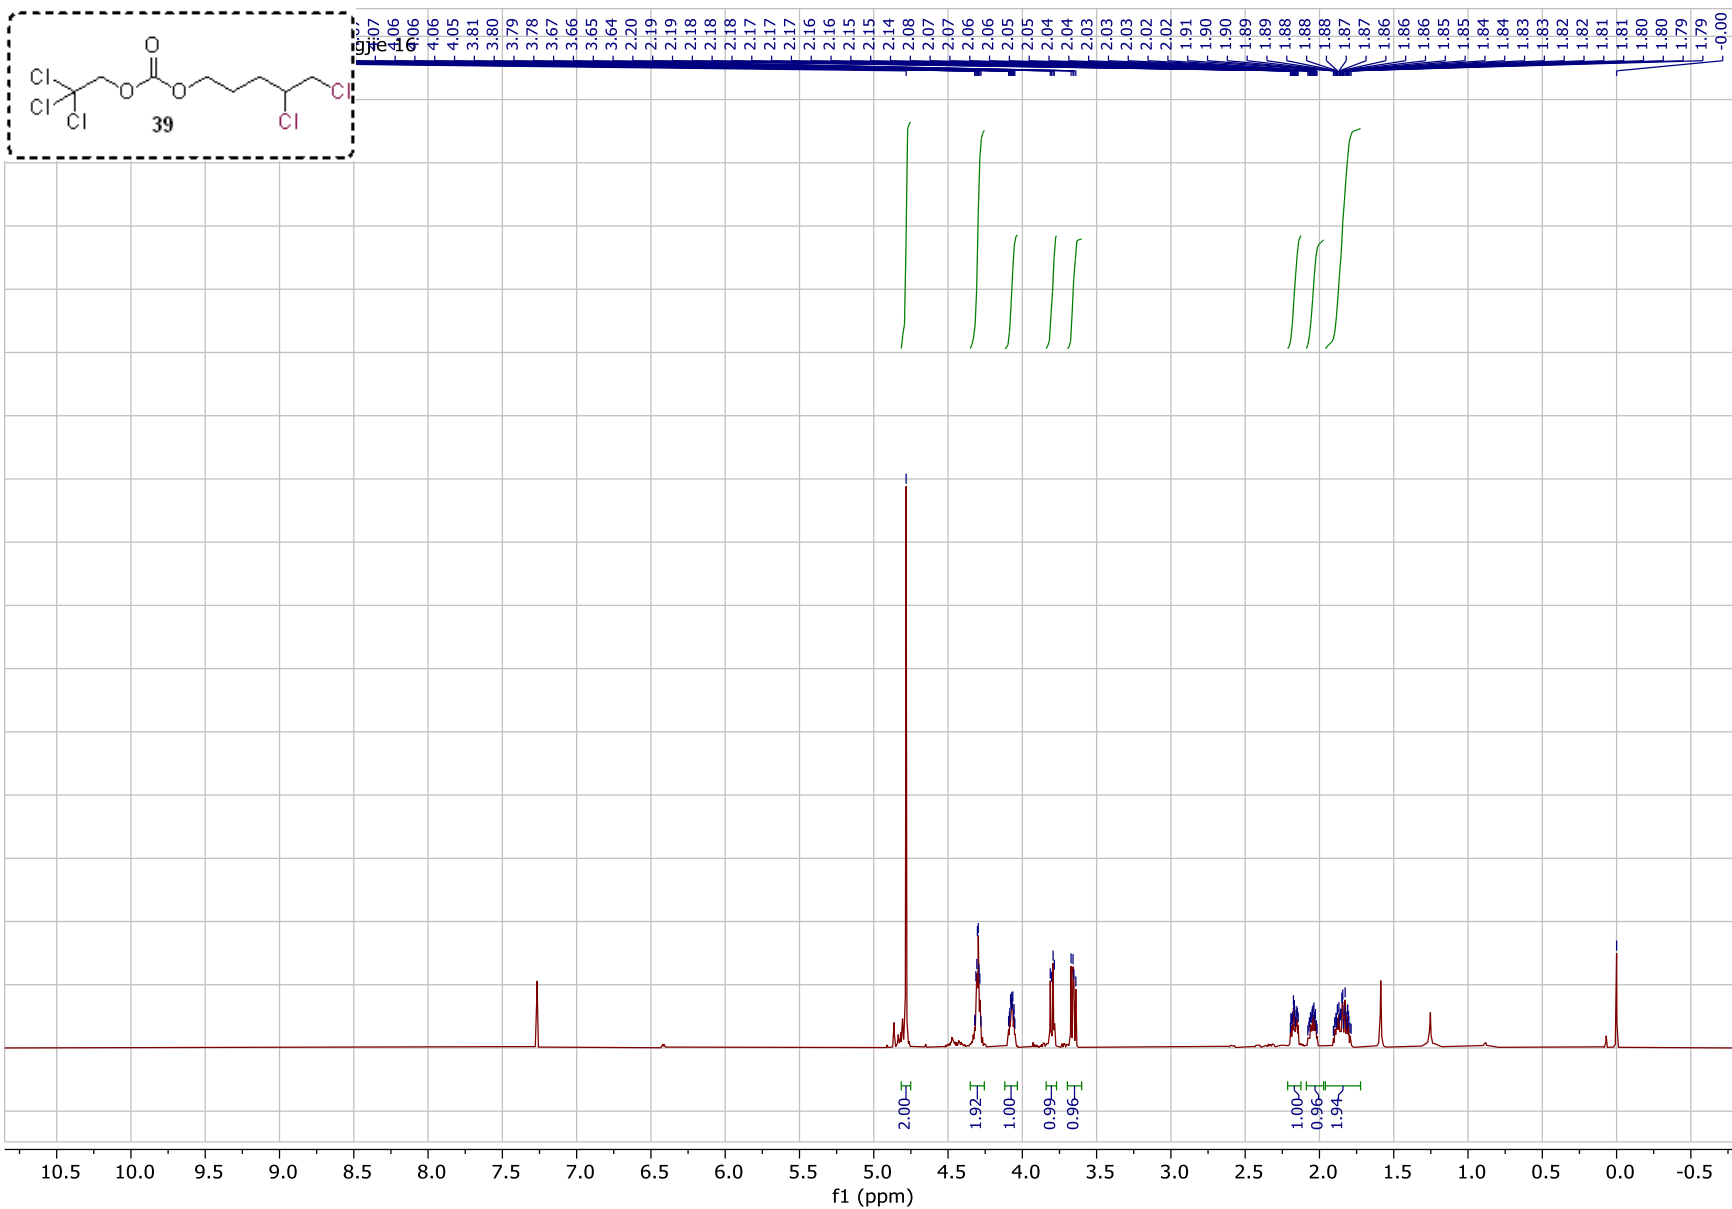

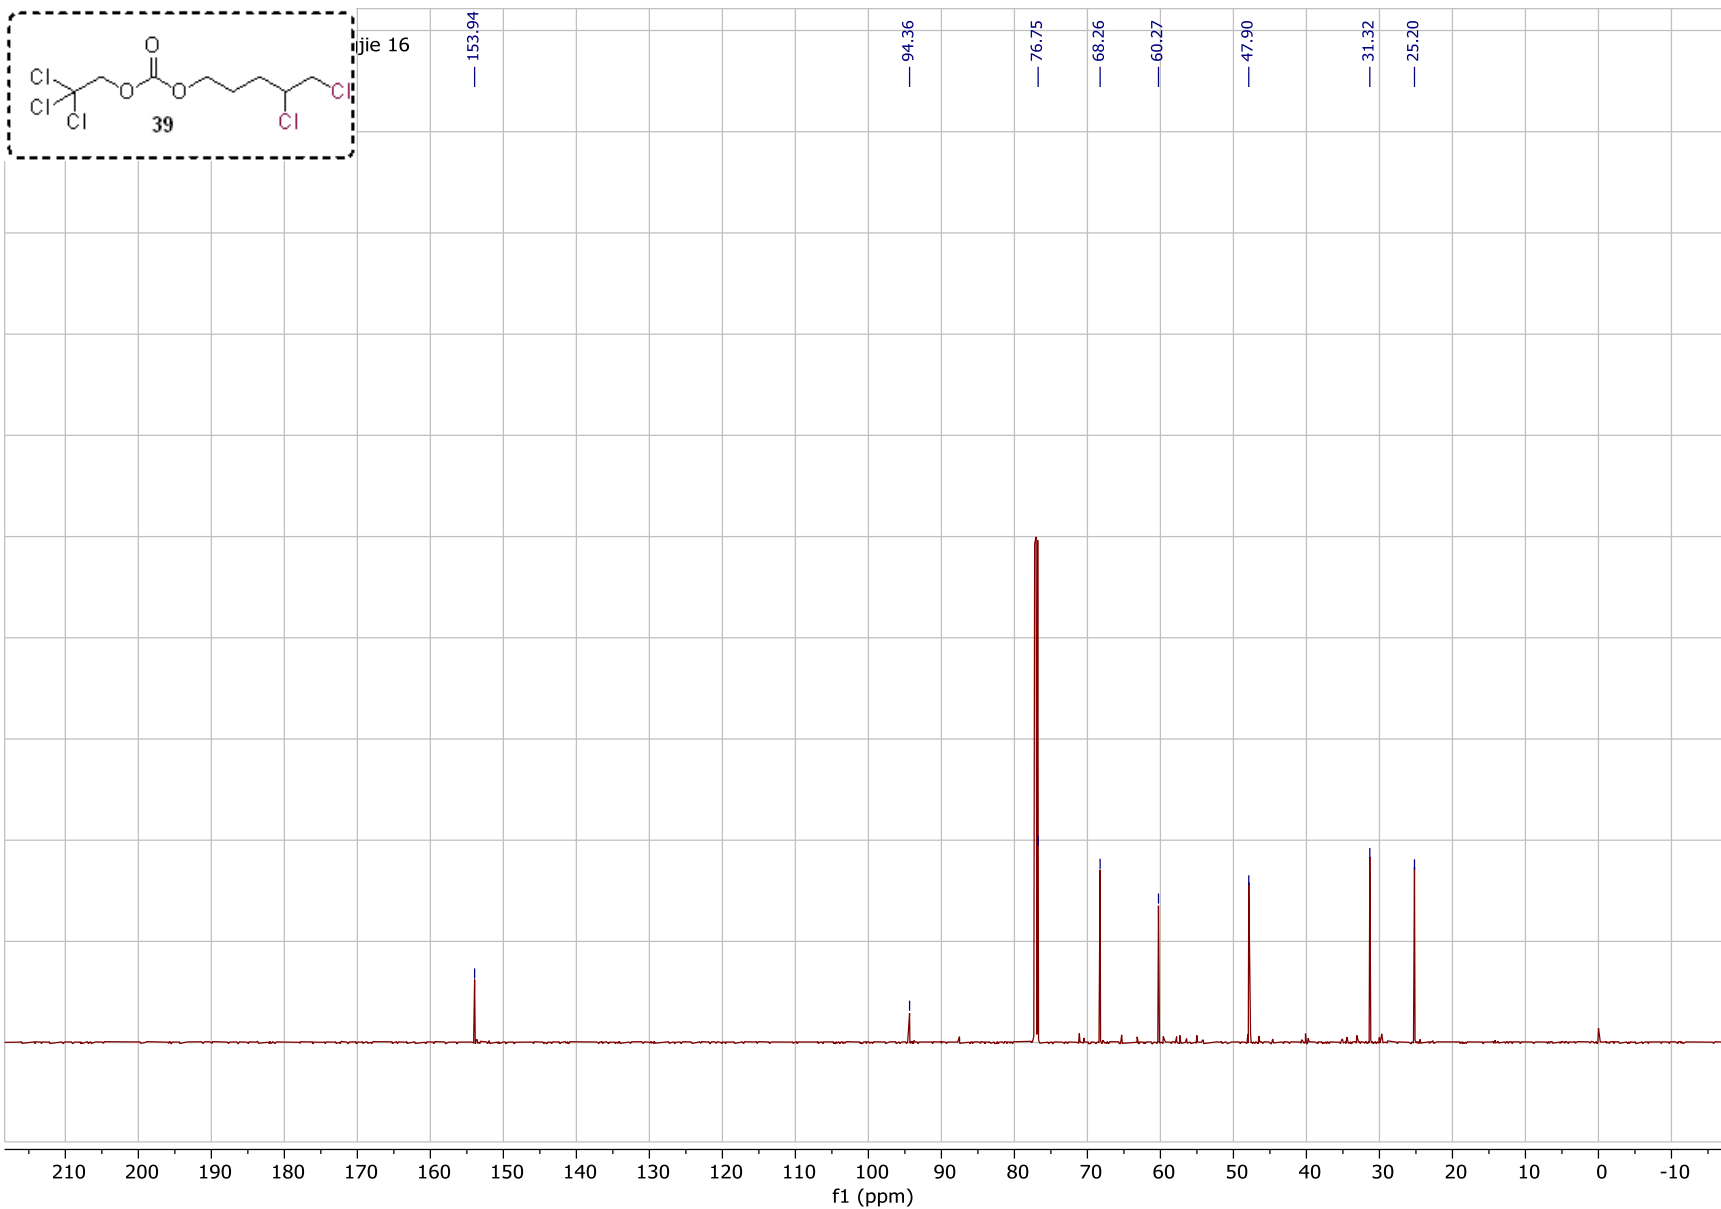

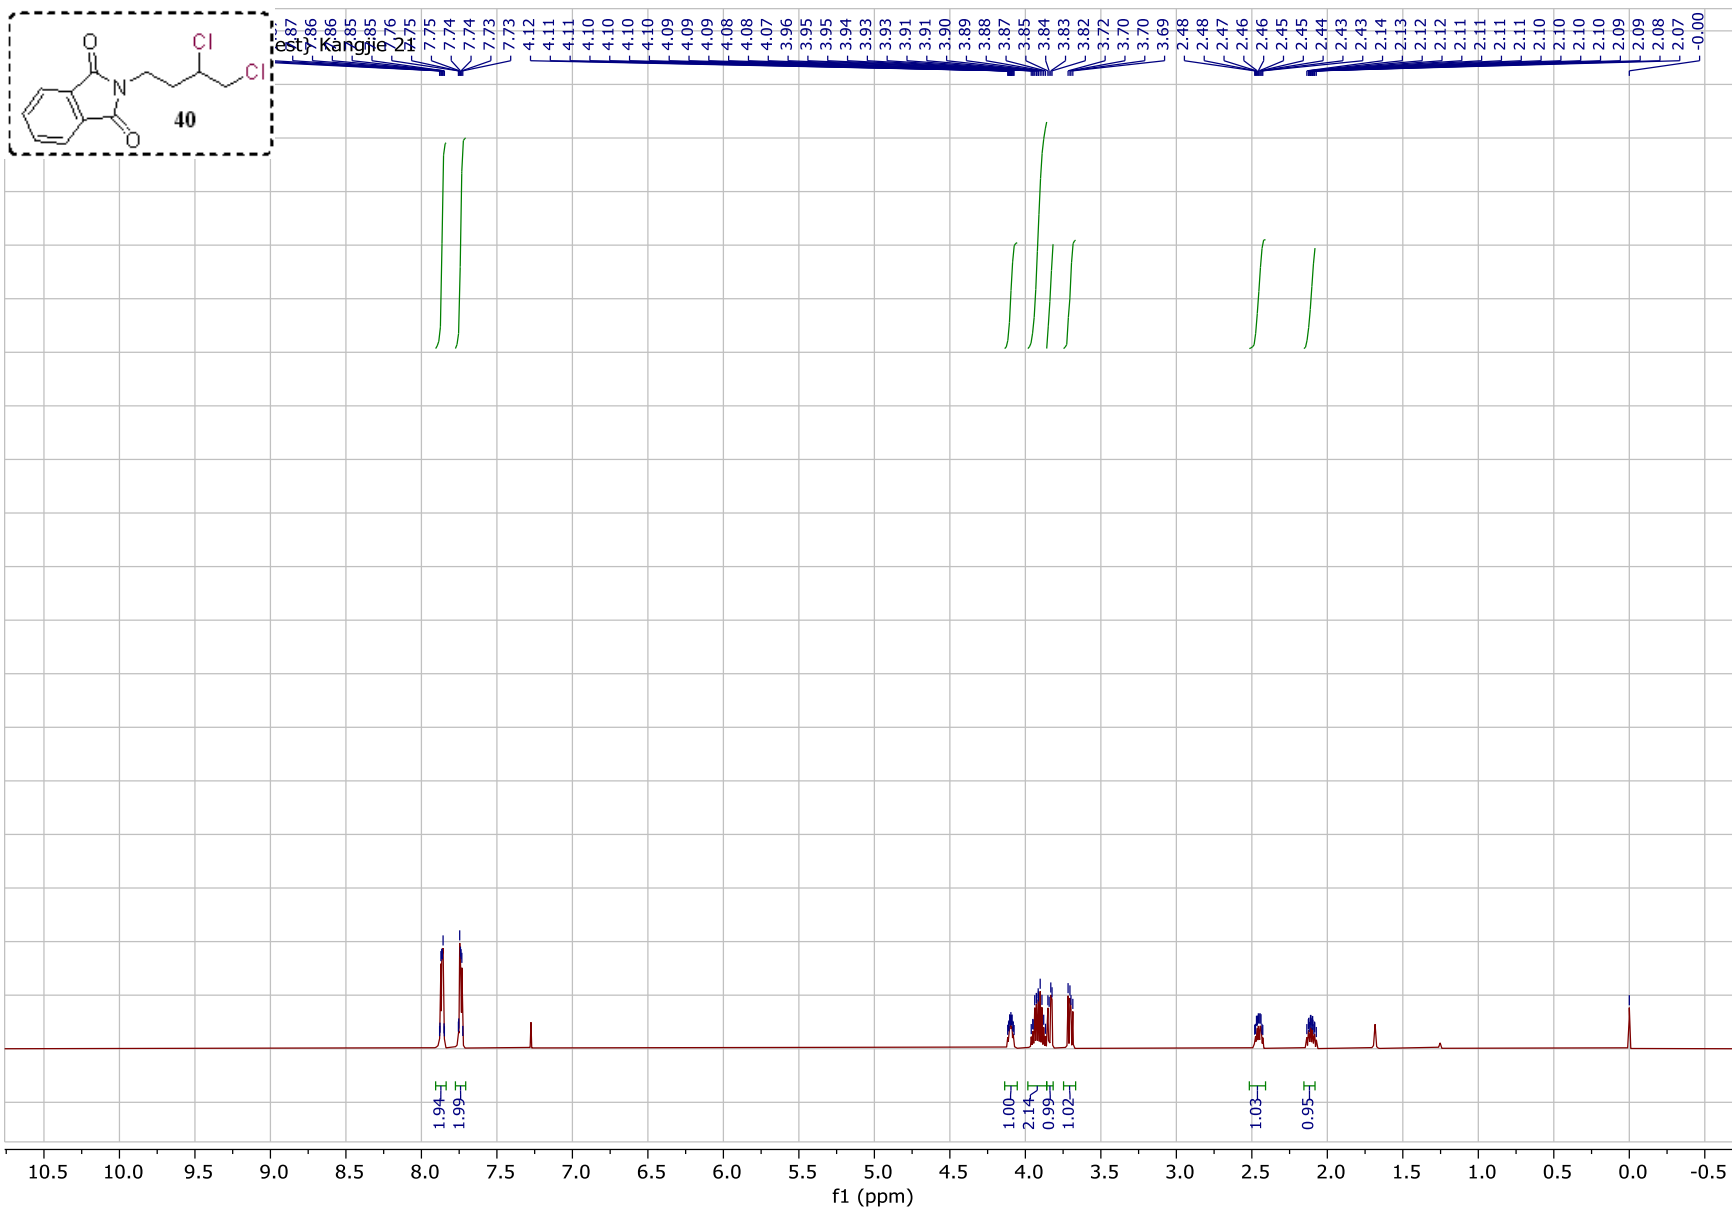

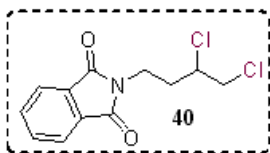

est) Kang 21

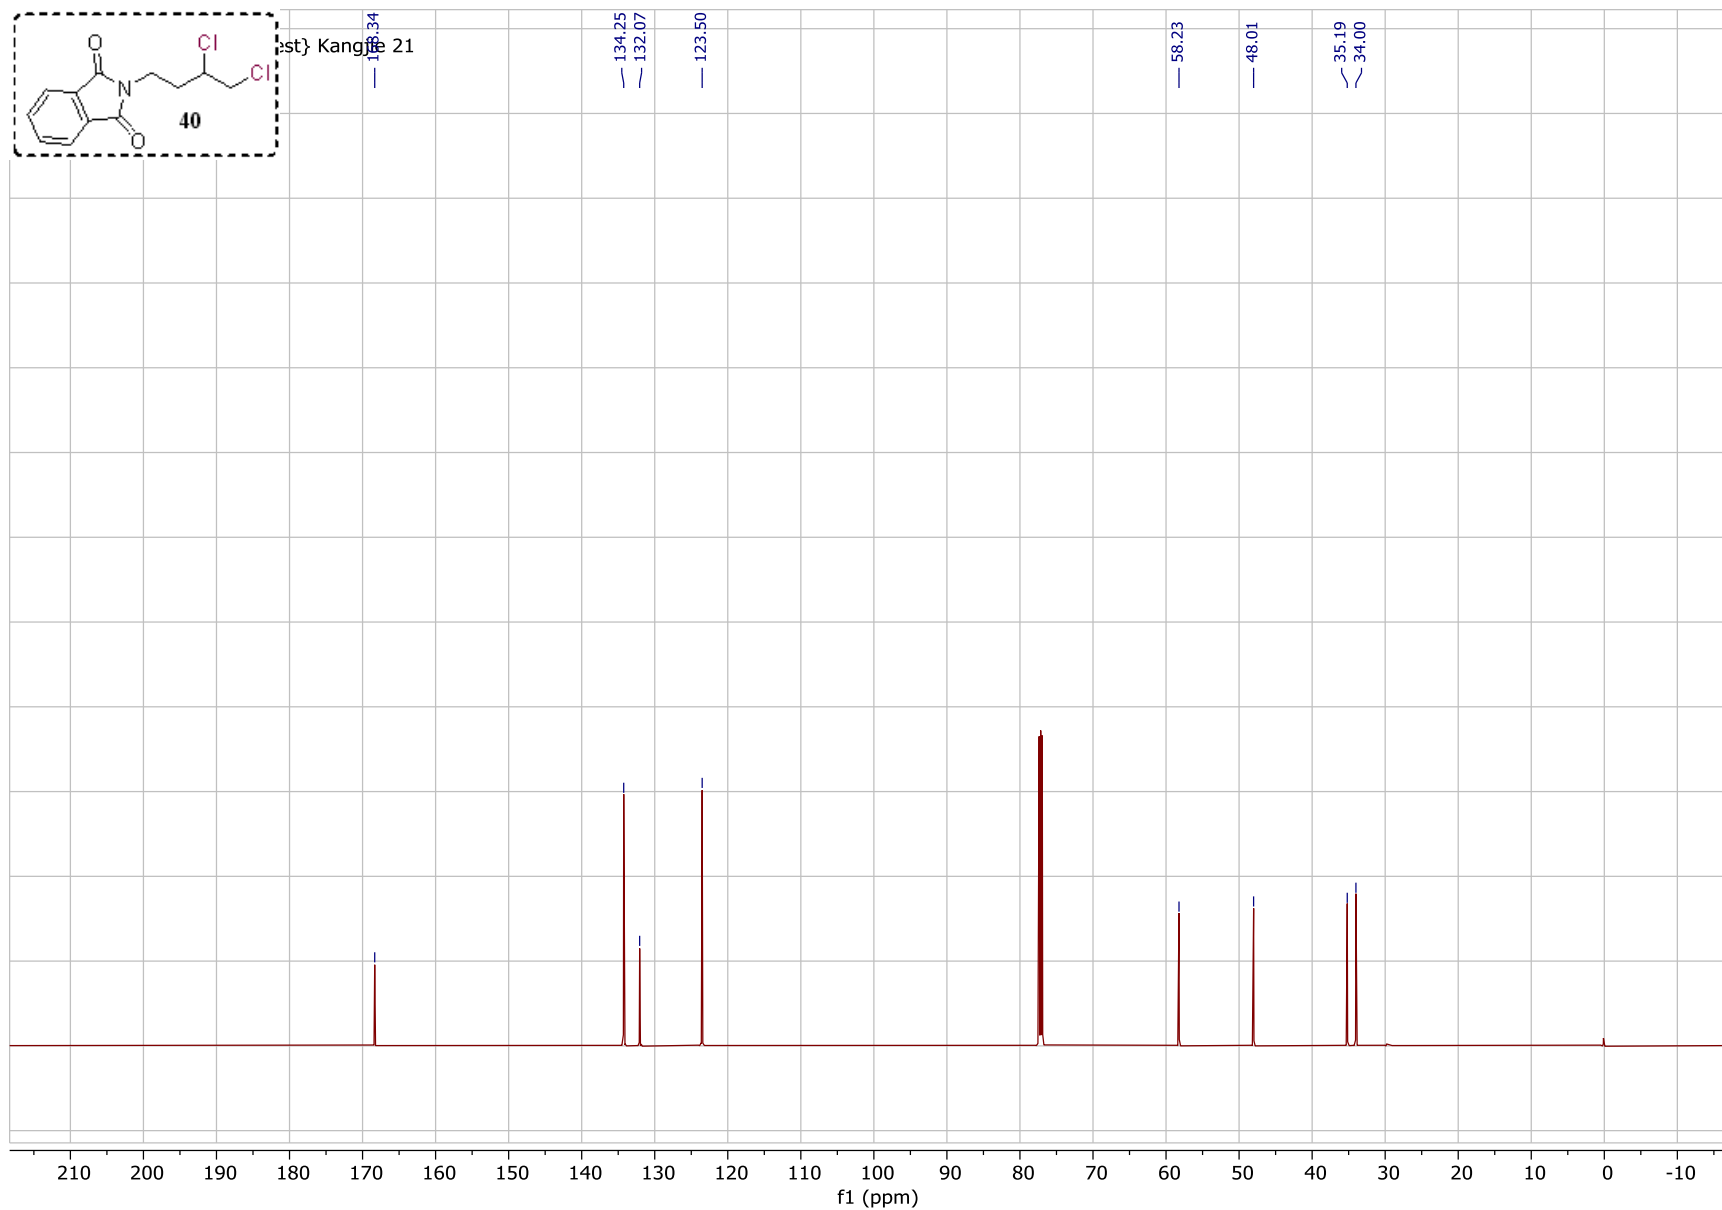



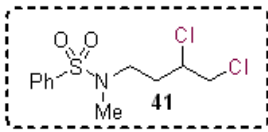

est} Kangjie 14

136.93  
132.83  
129.20  
127.42

57.65

48.08  
47.25

35.52  
33.50

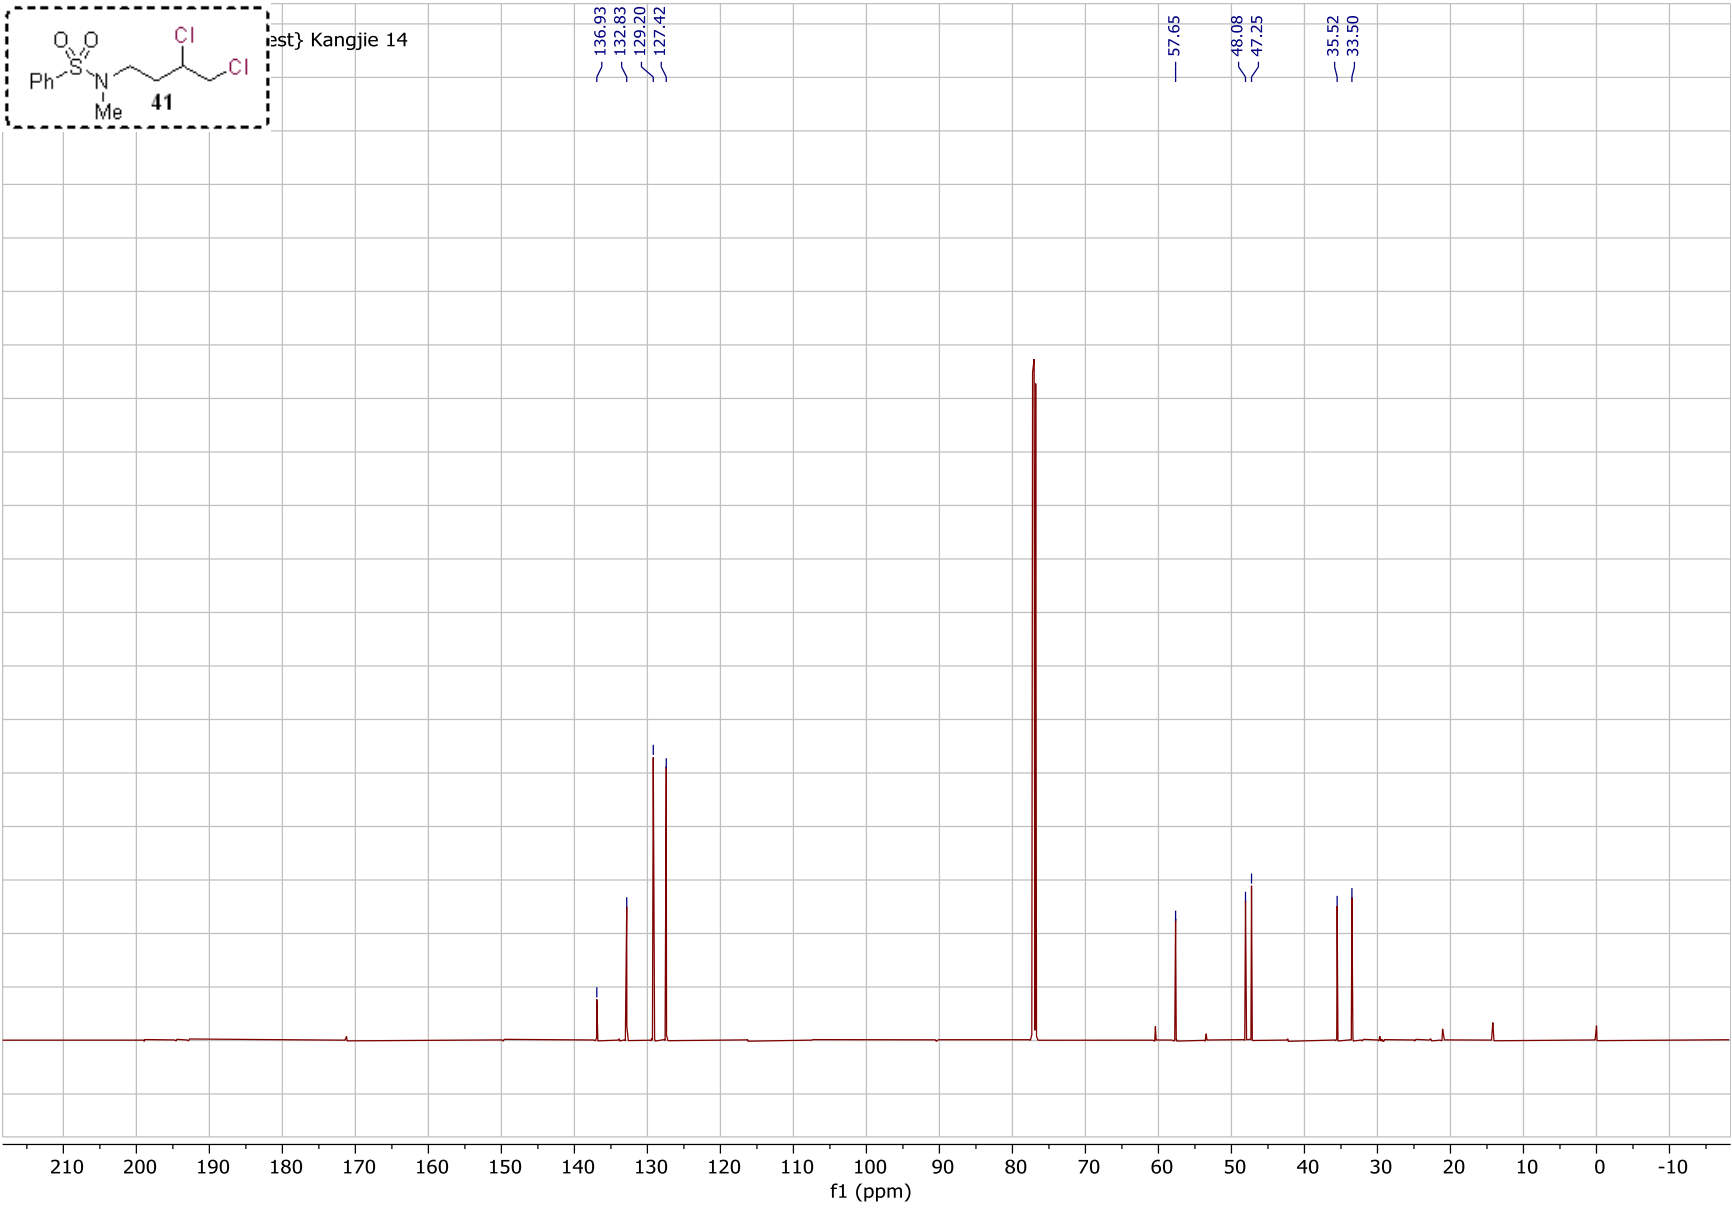

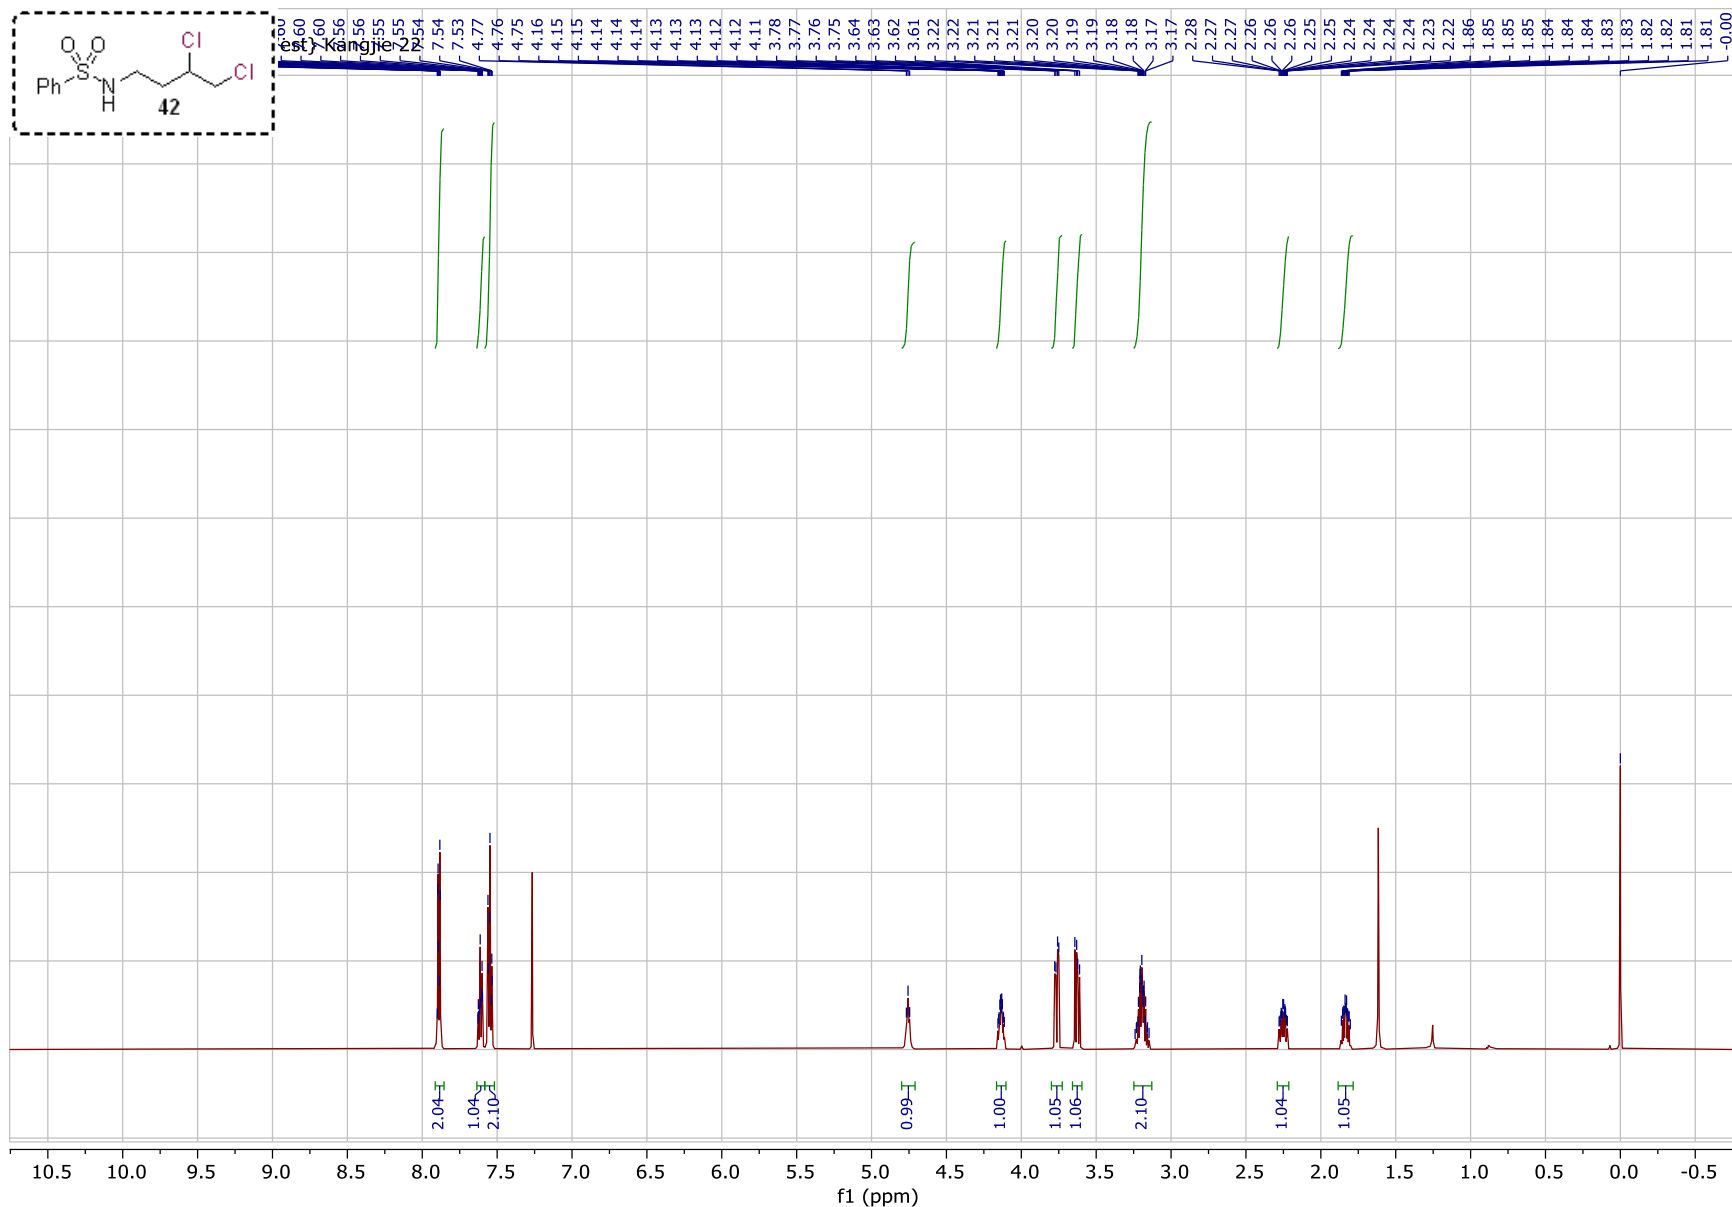



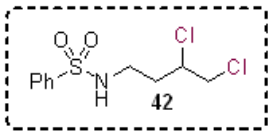

ast) Kangjie 22

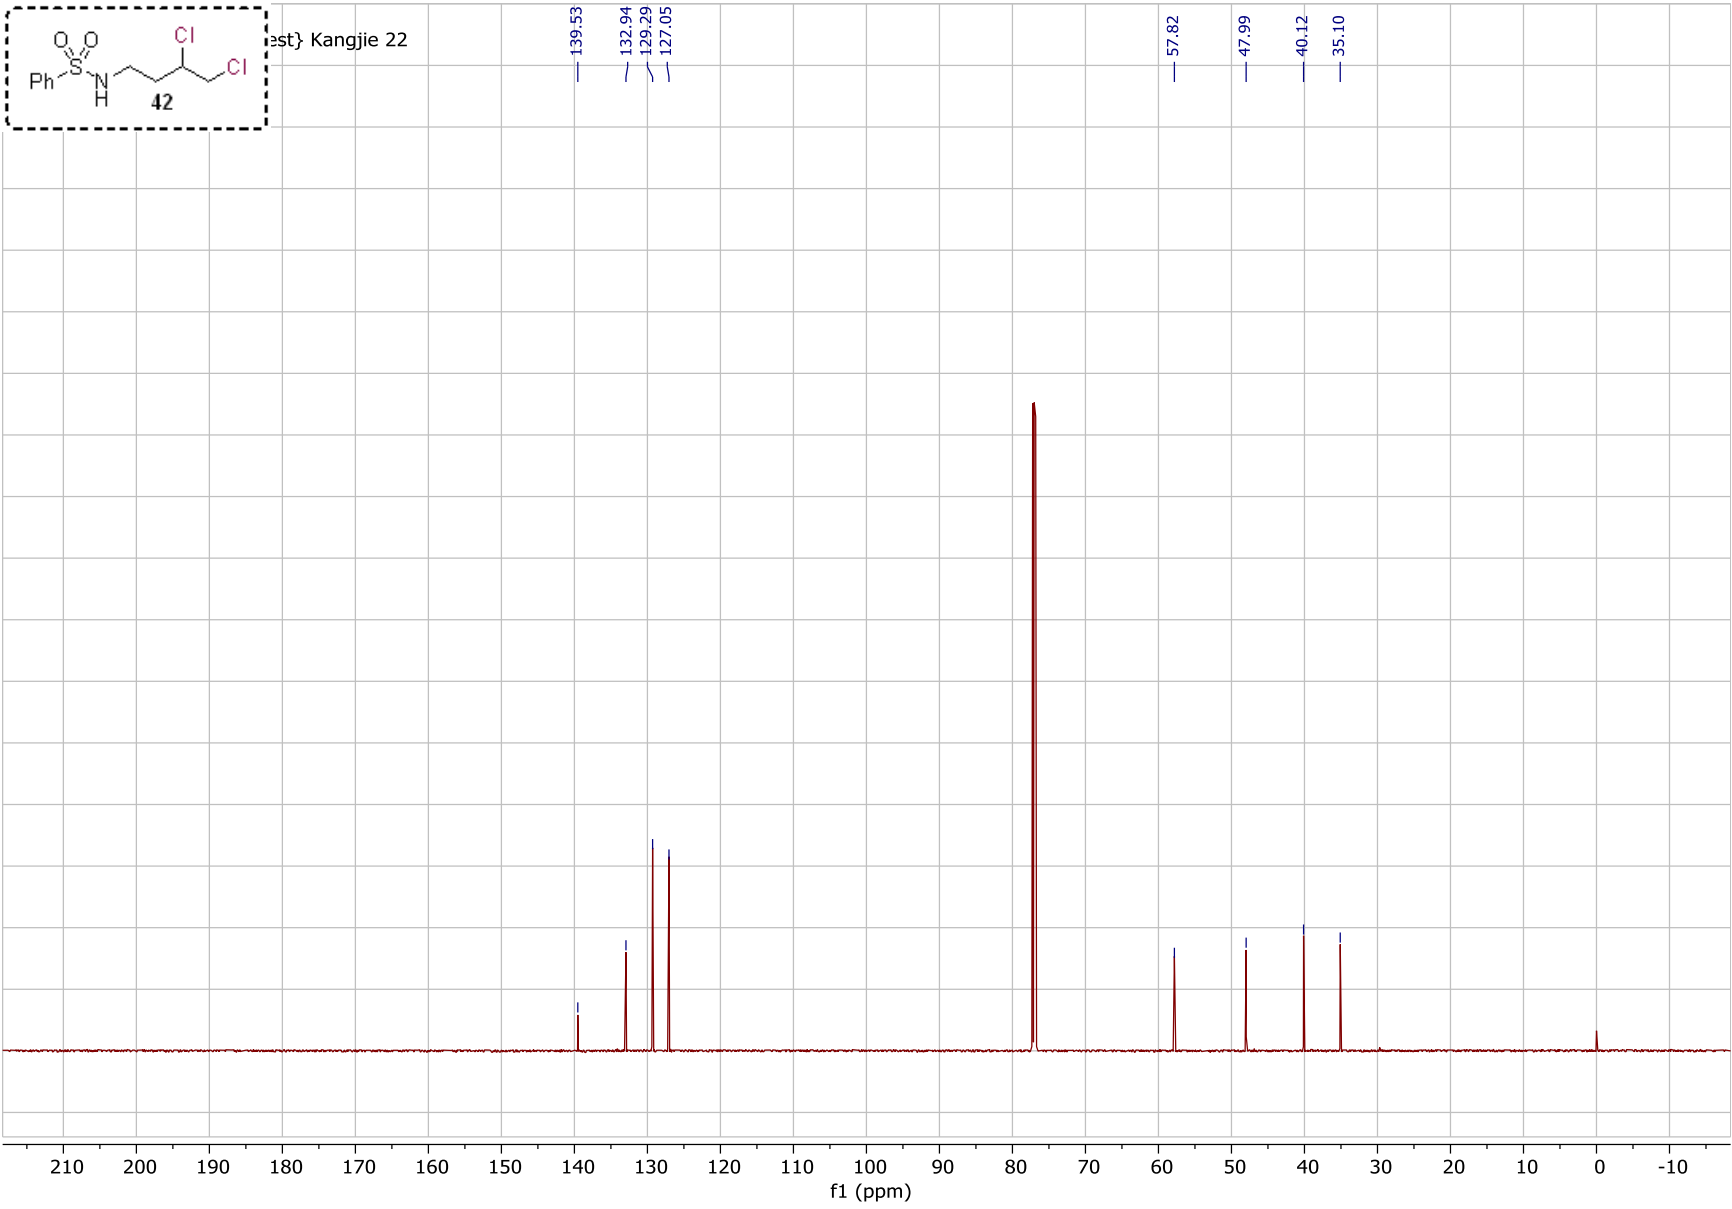

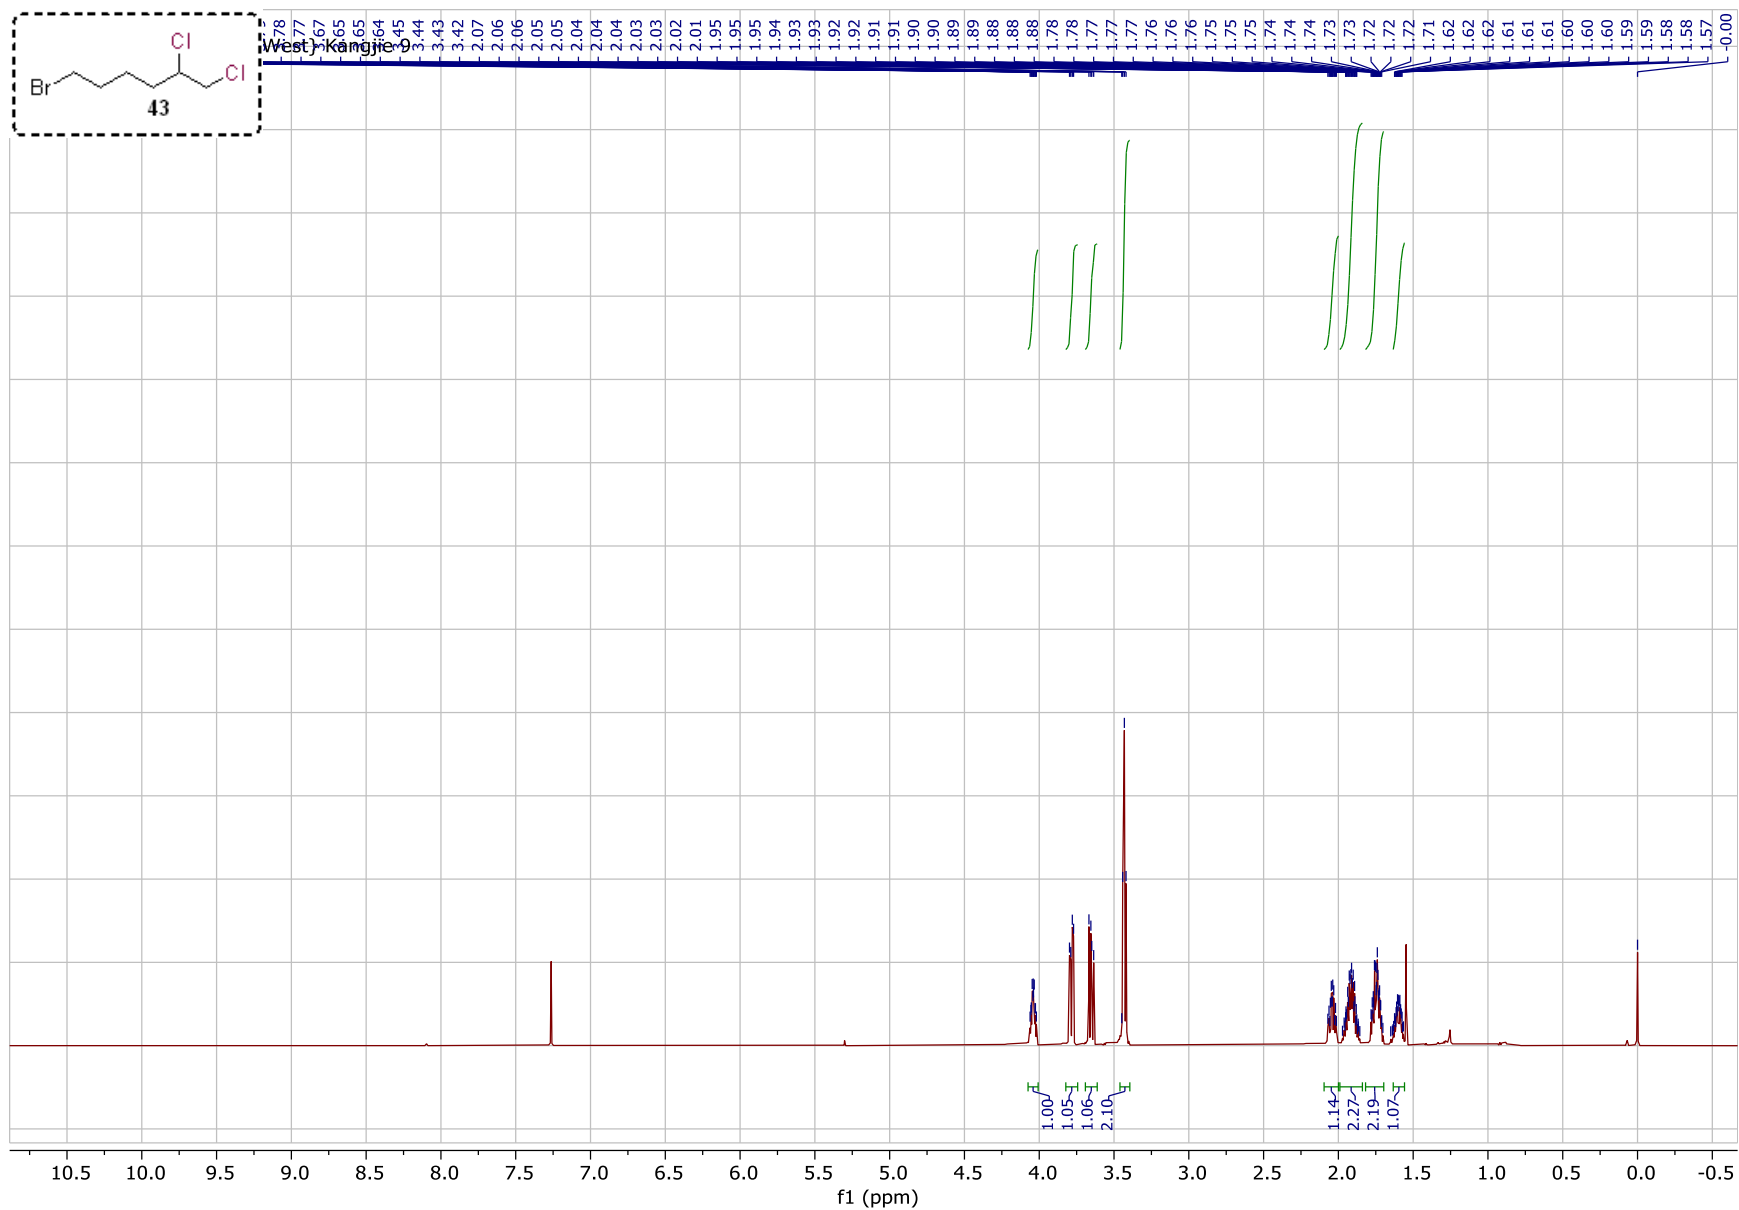

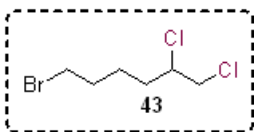

Vest, Kangjie 9

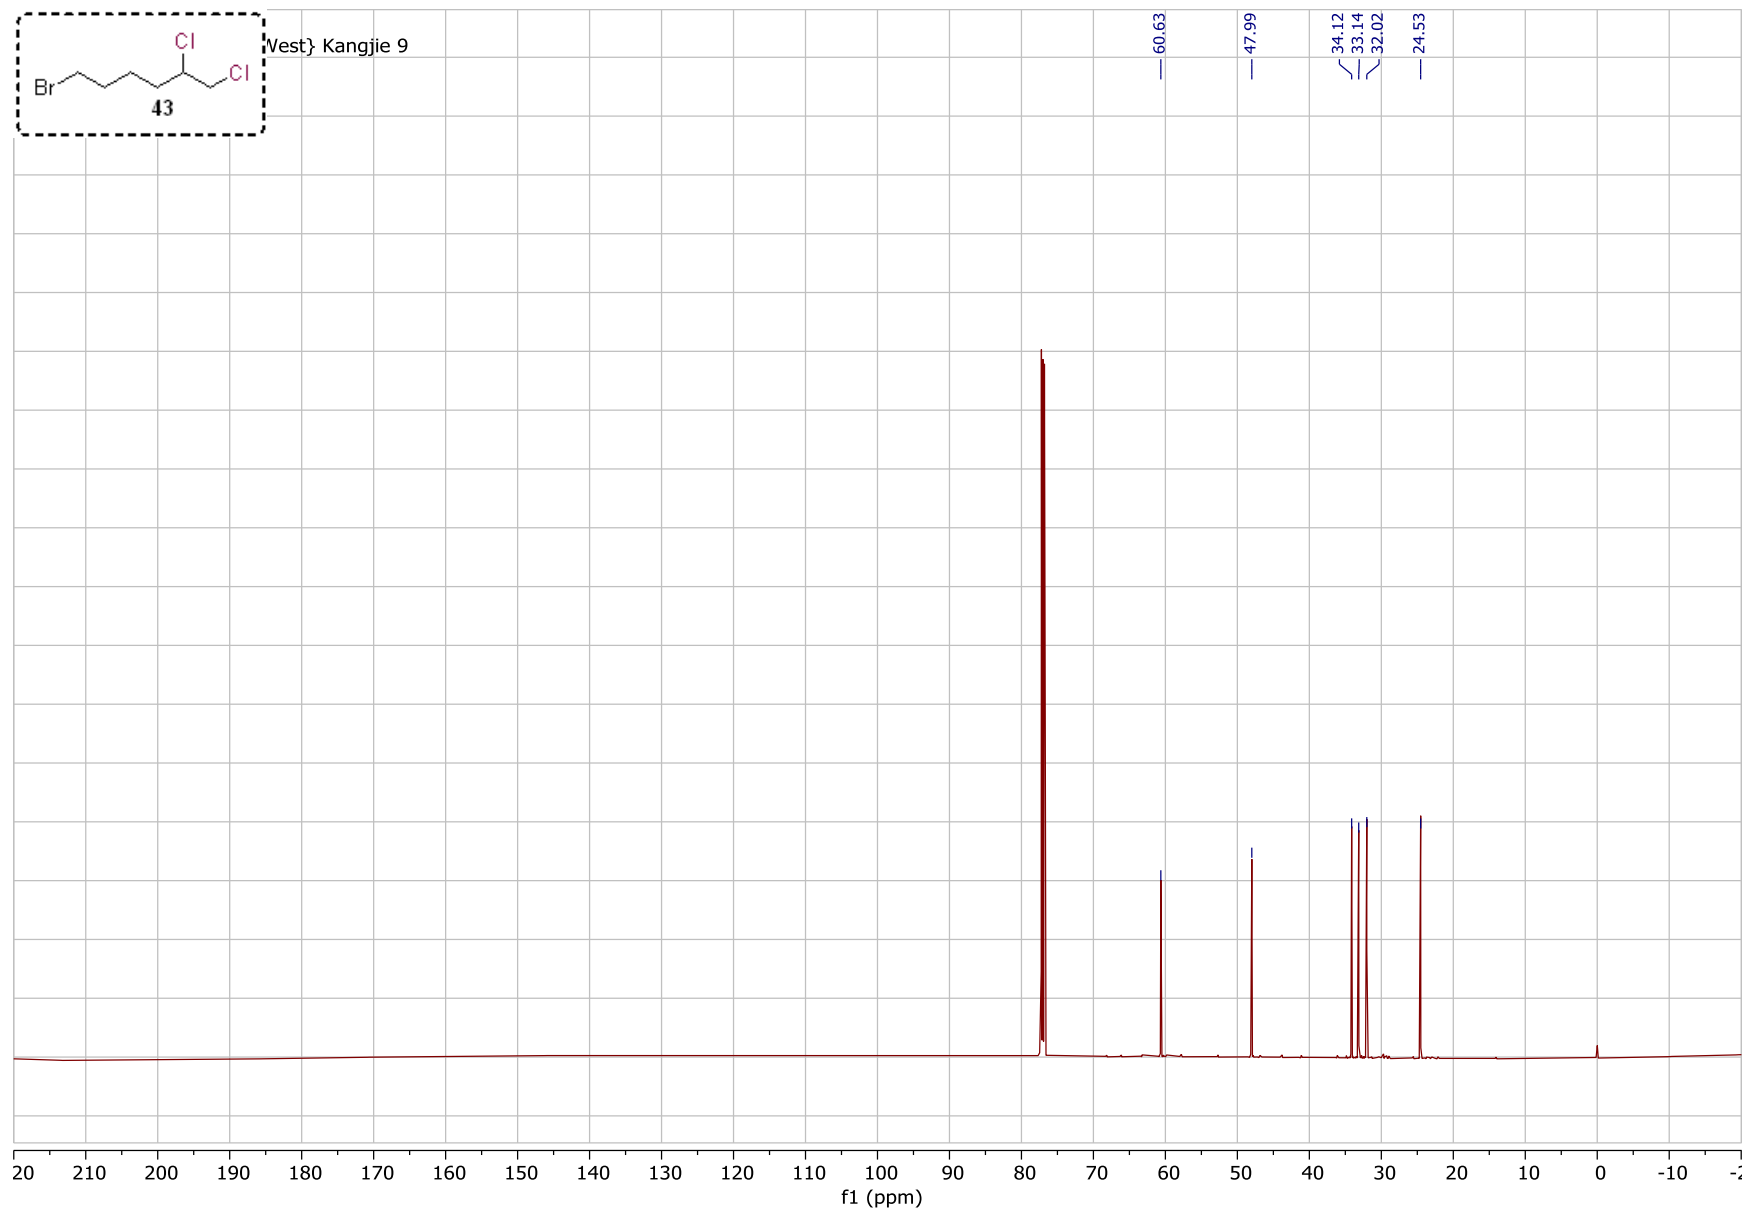

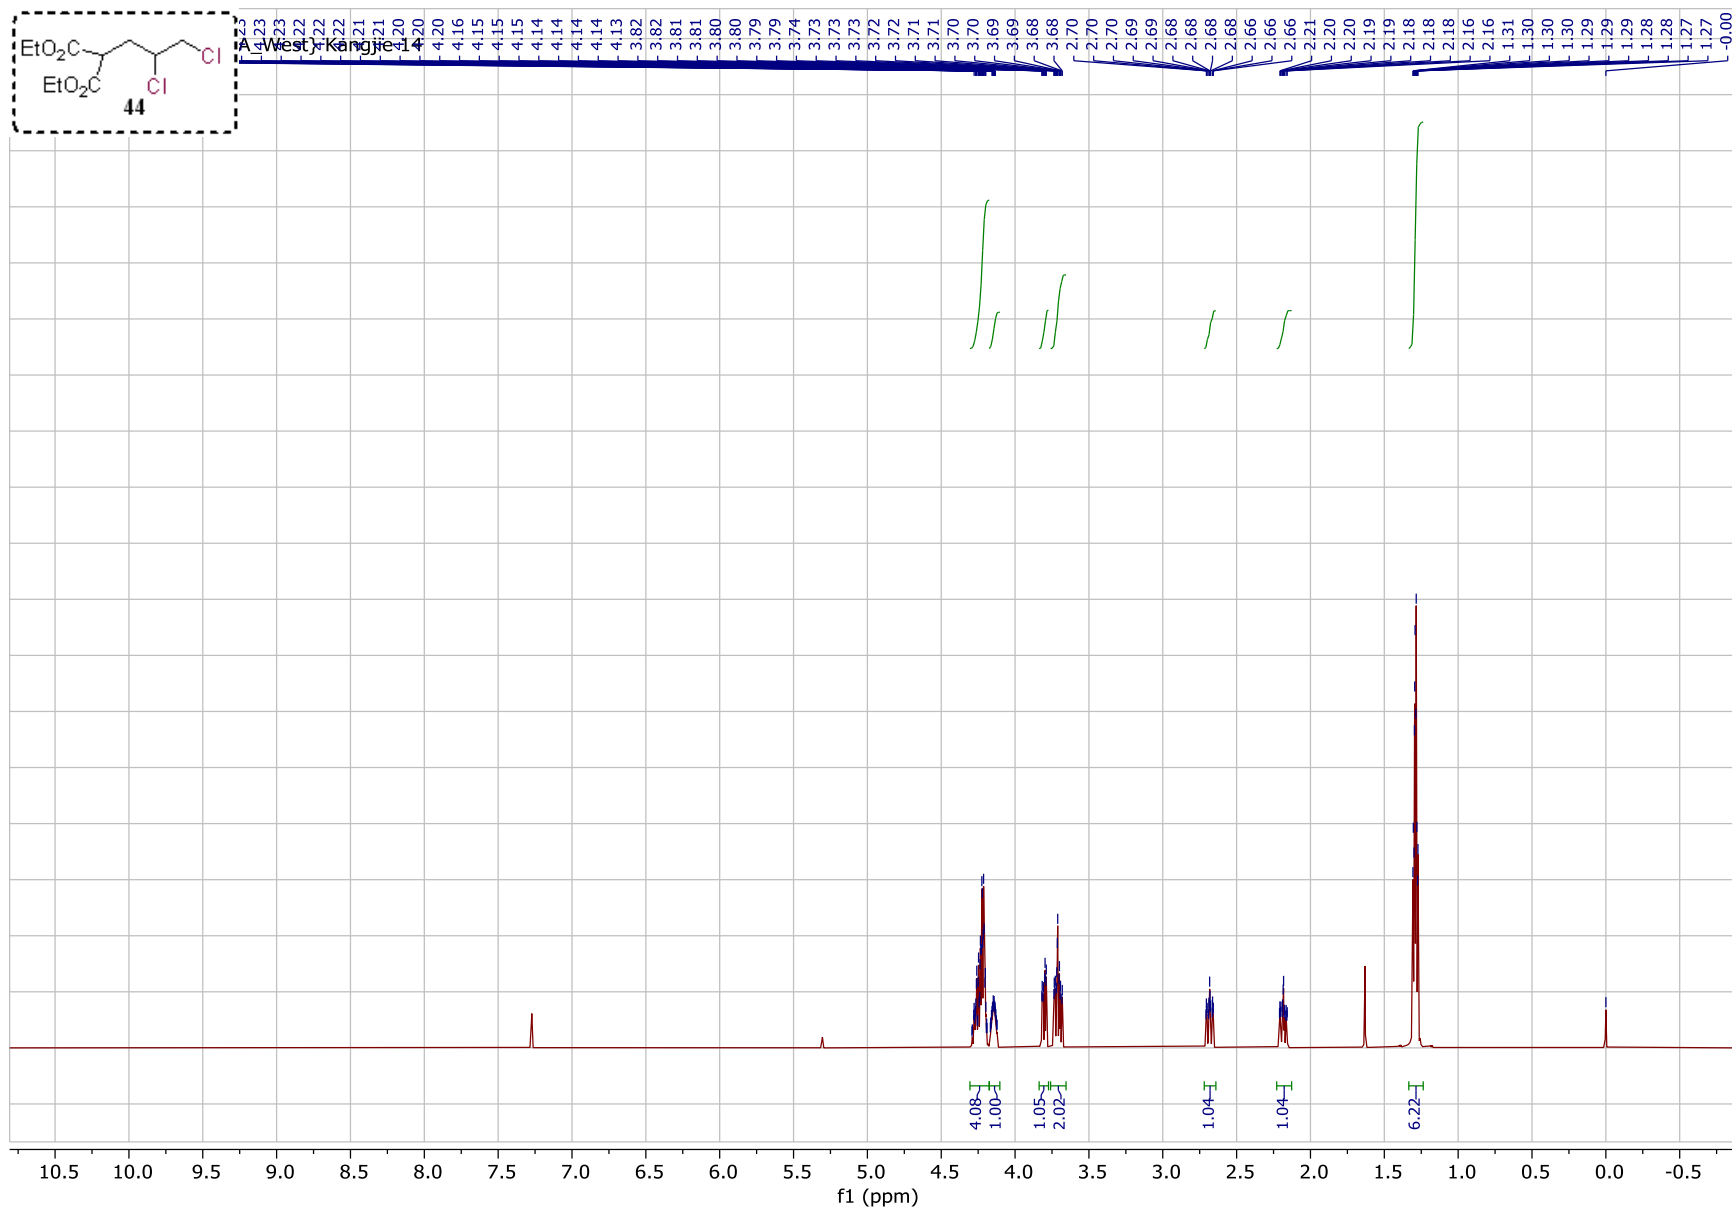

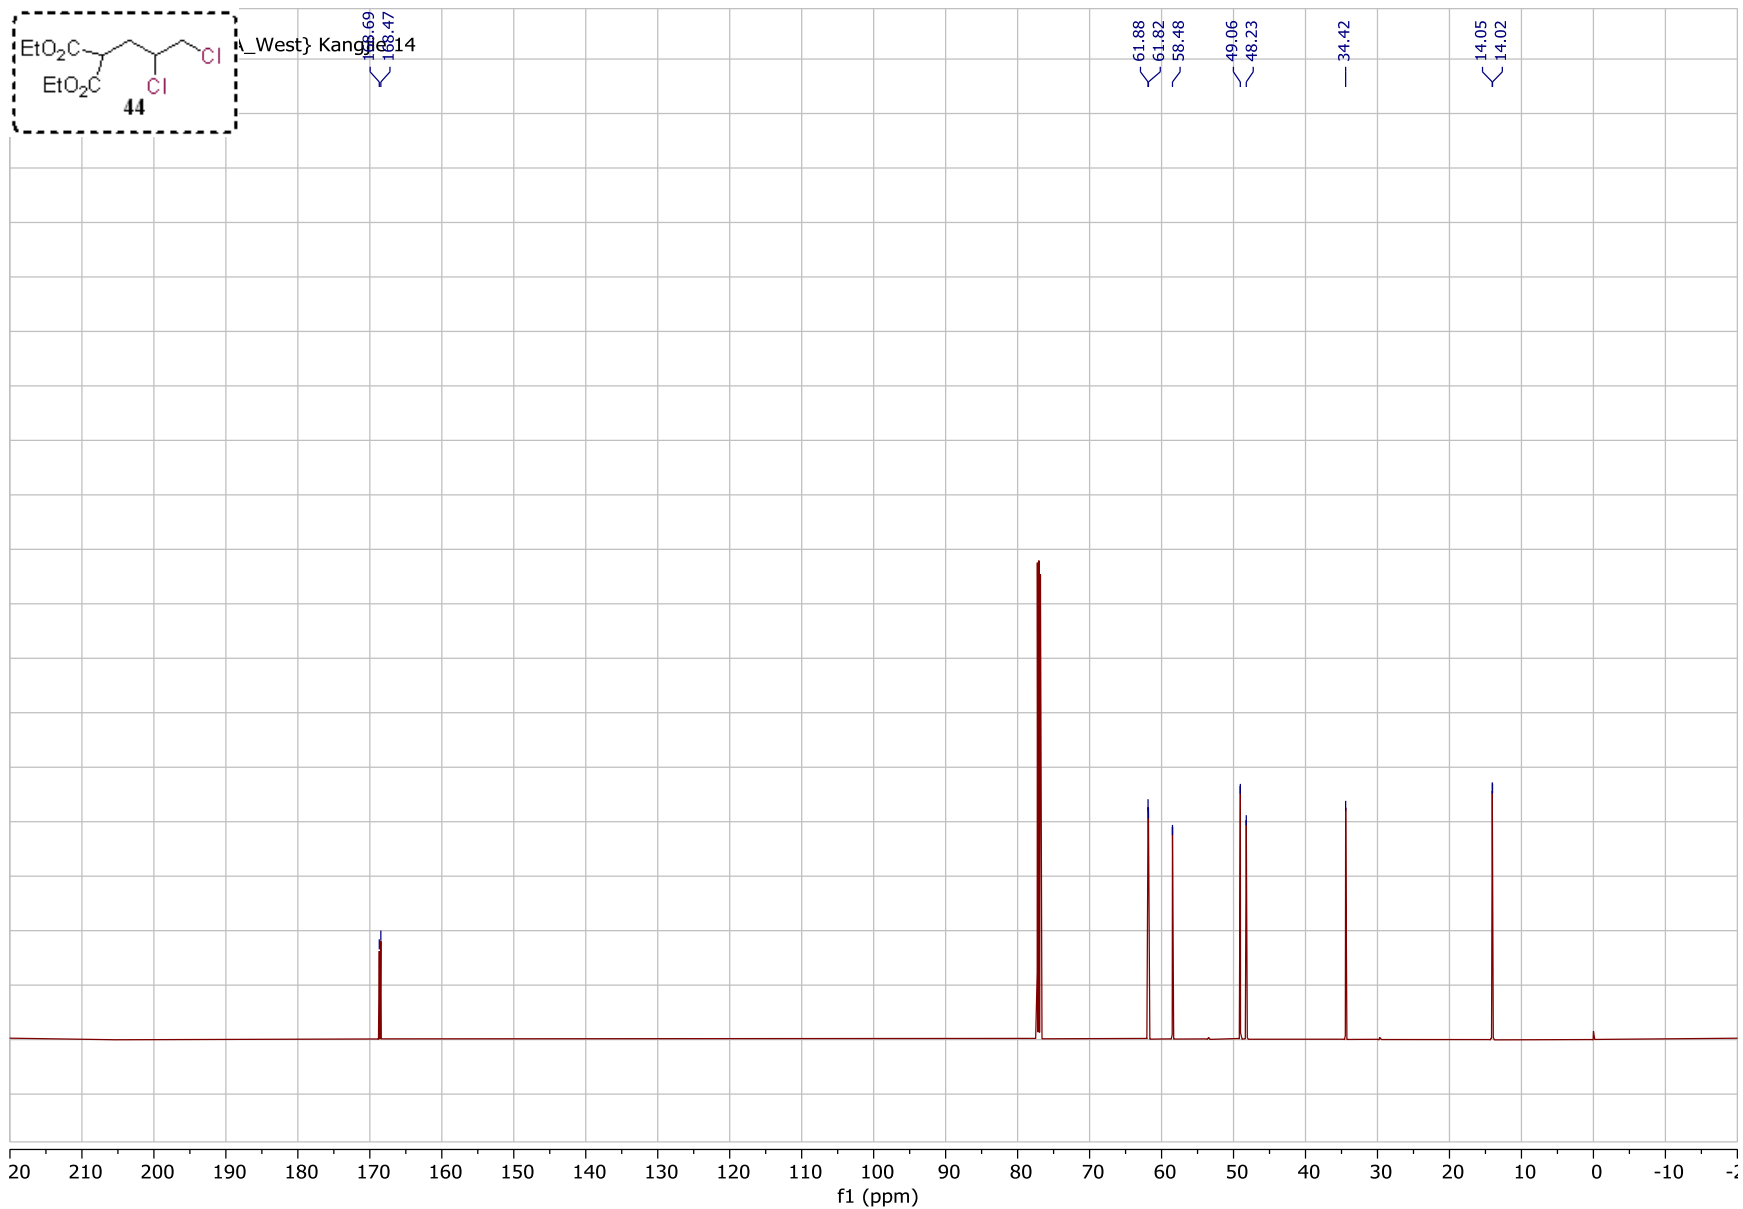

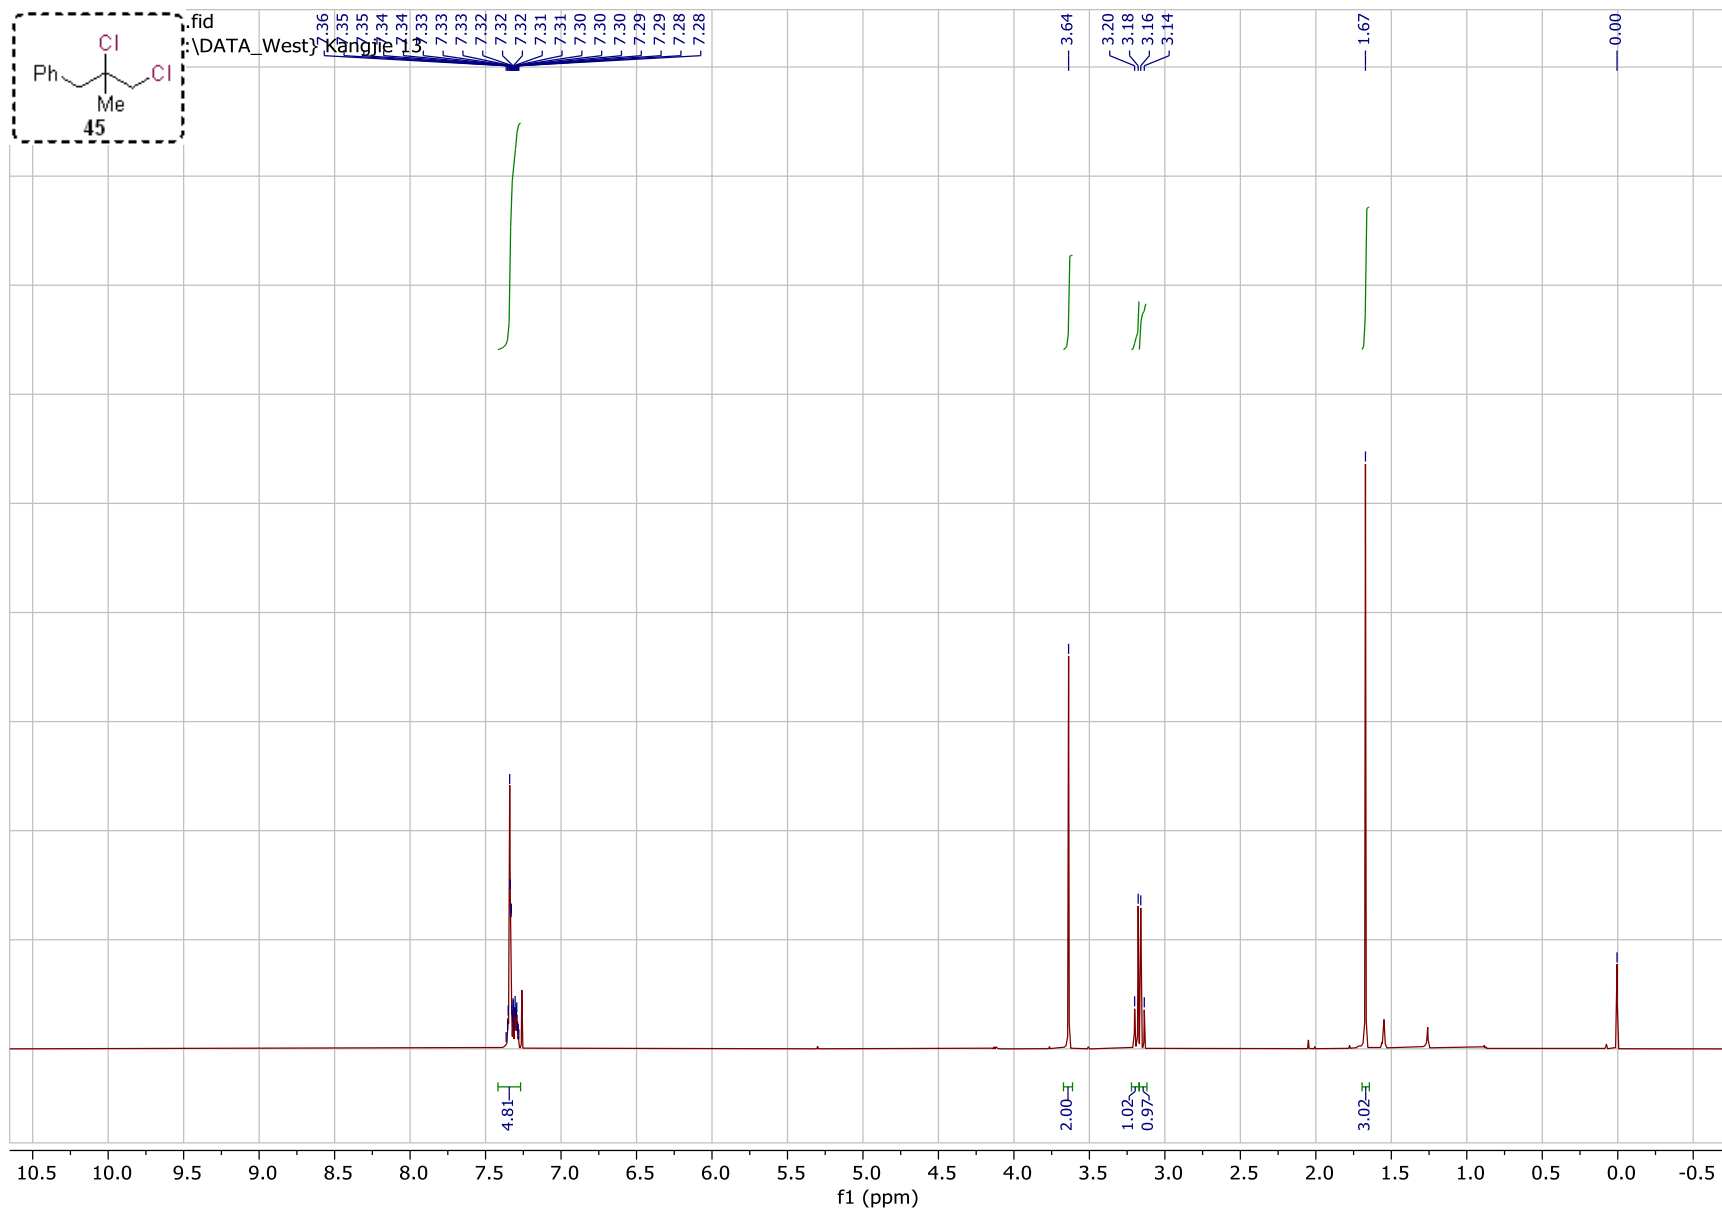

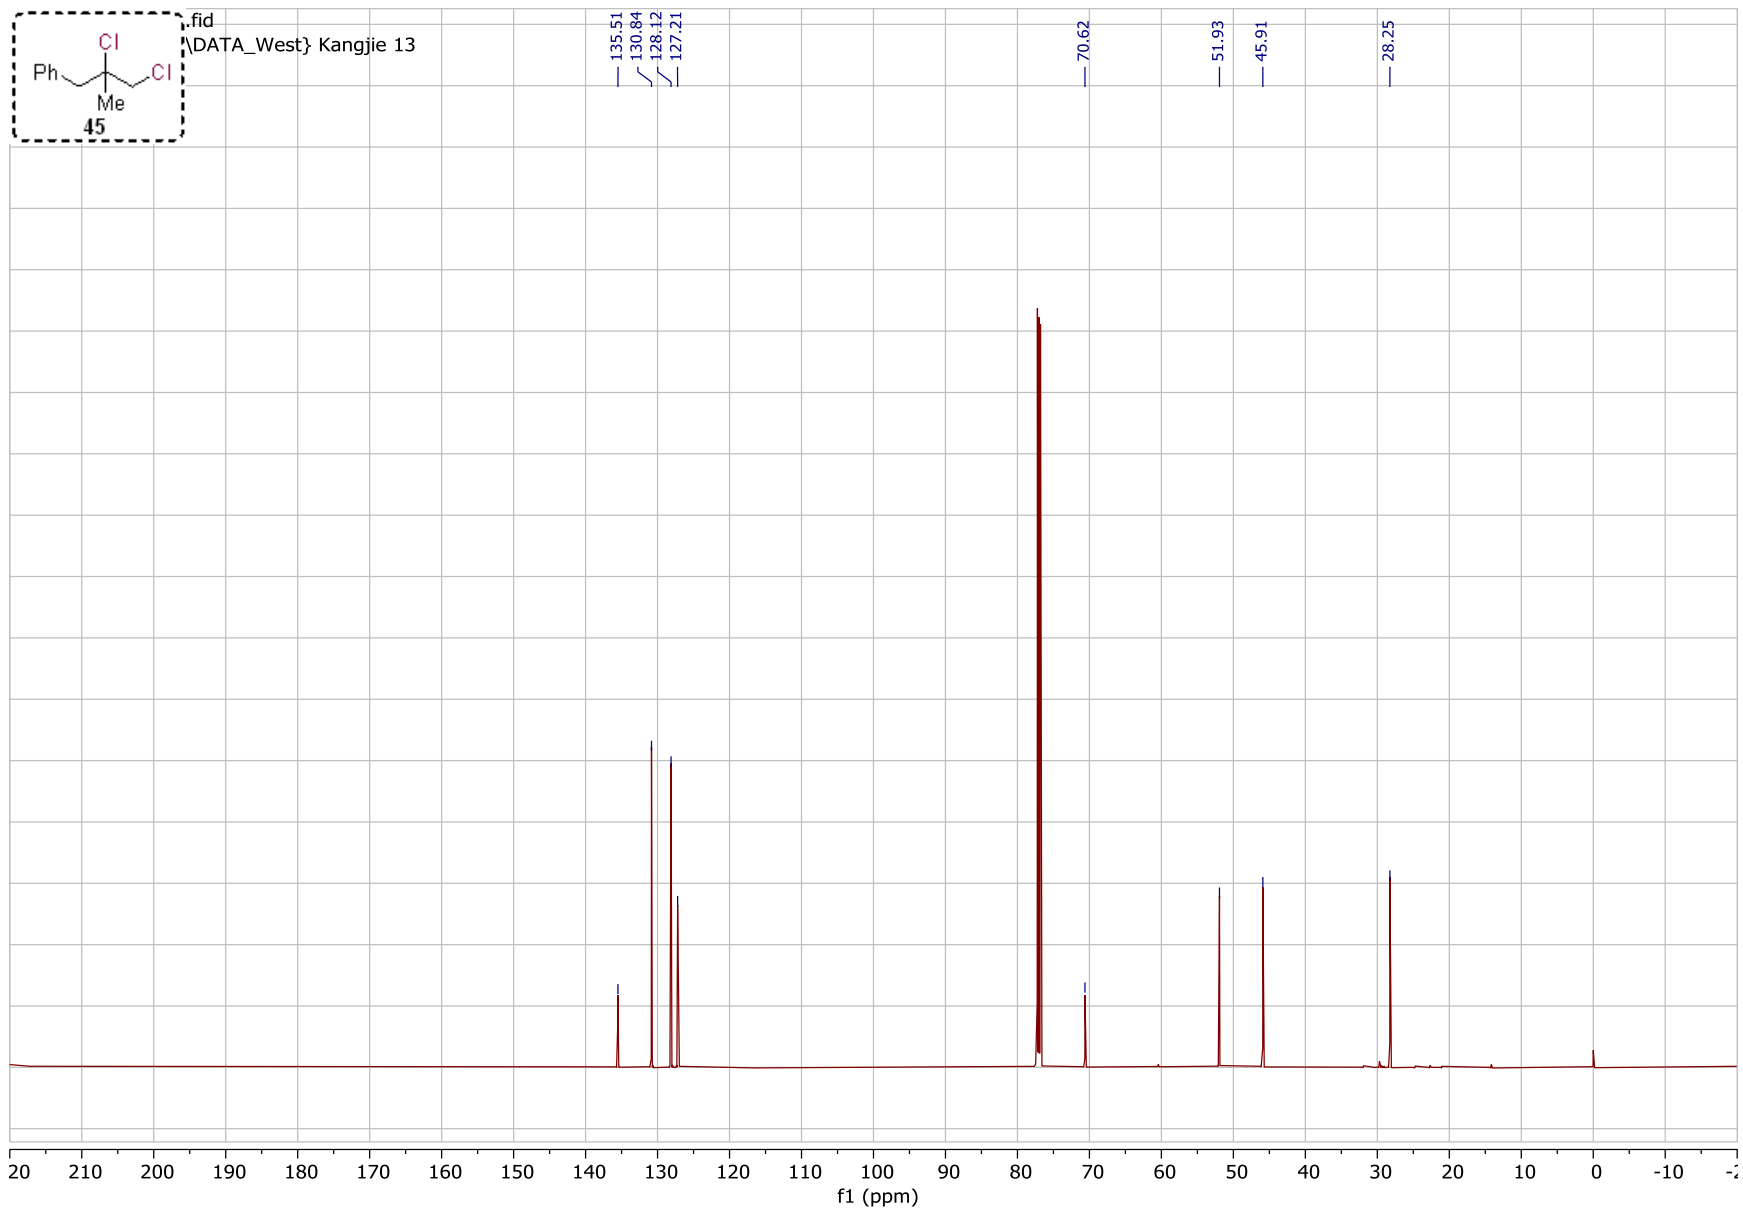

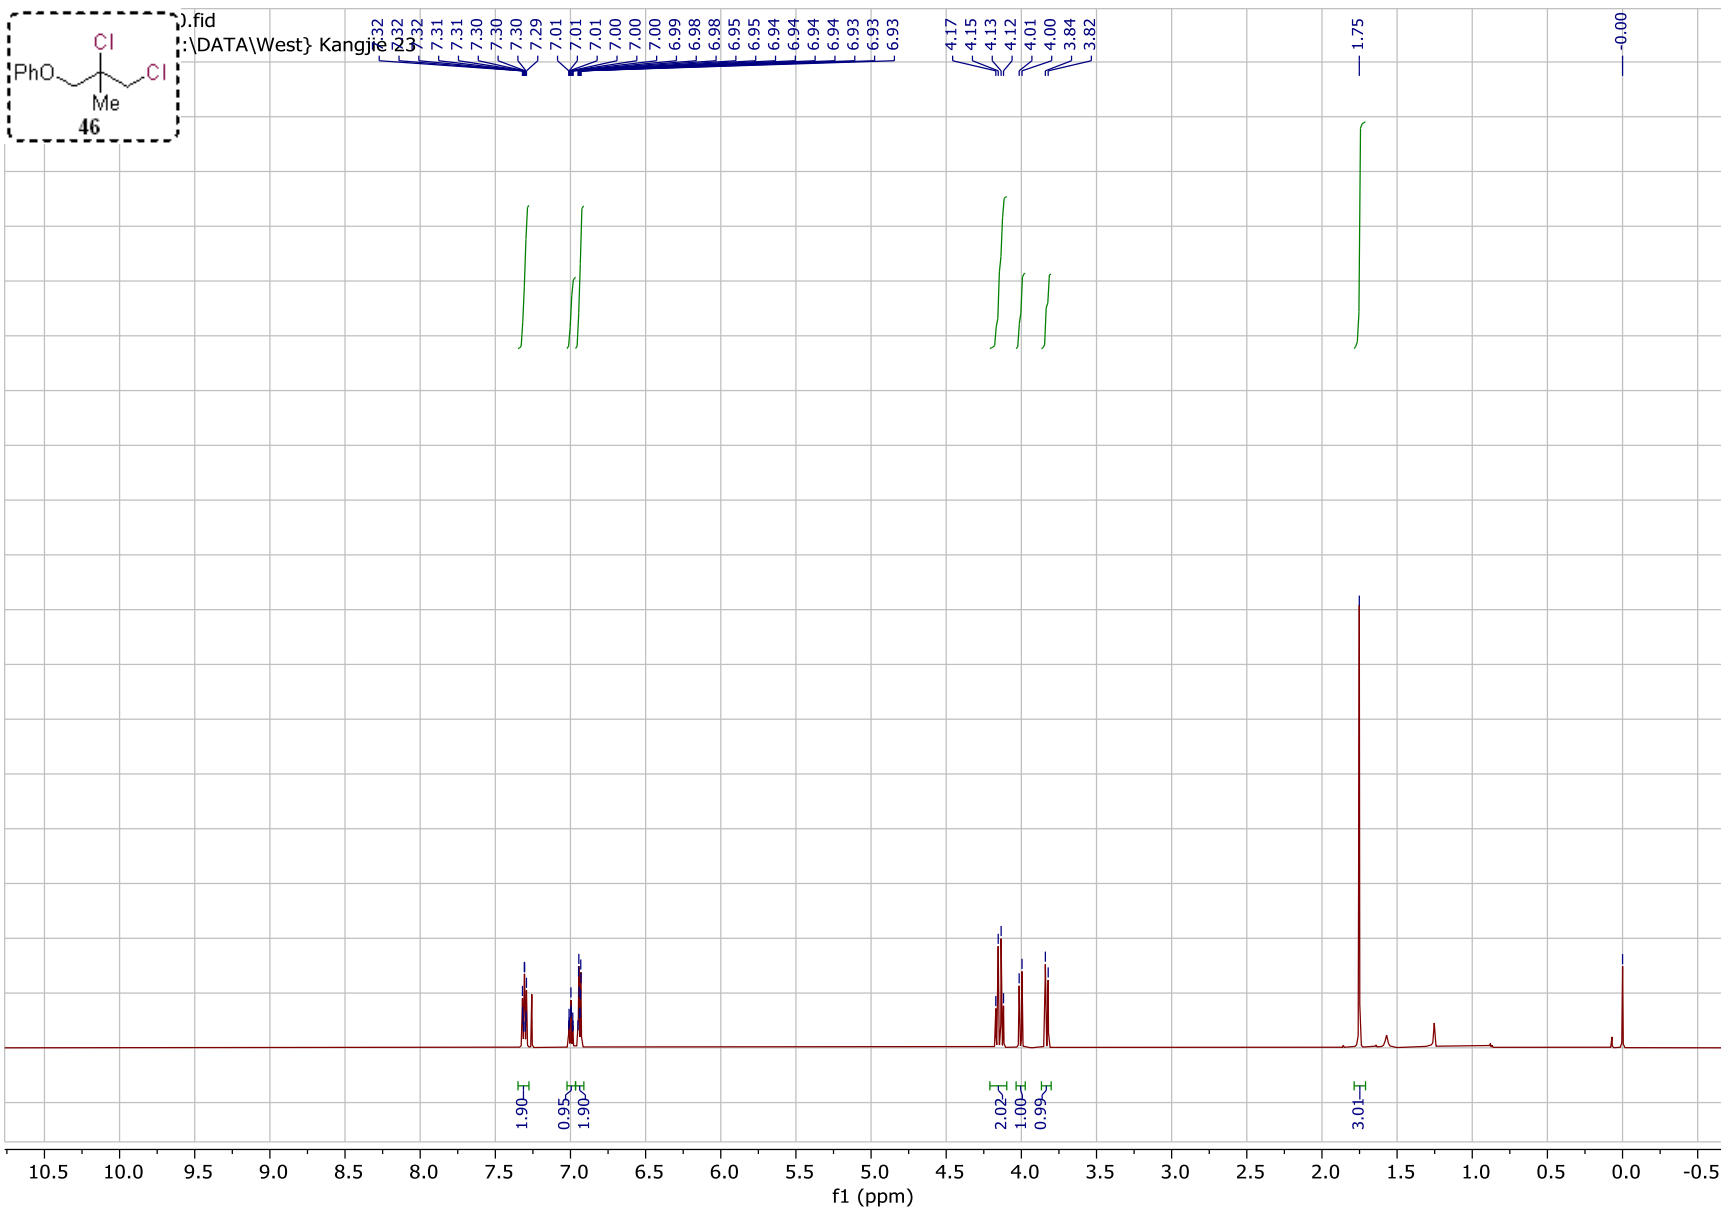



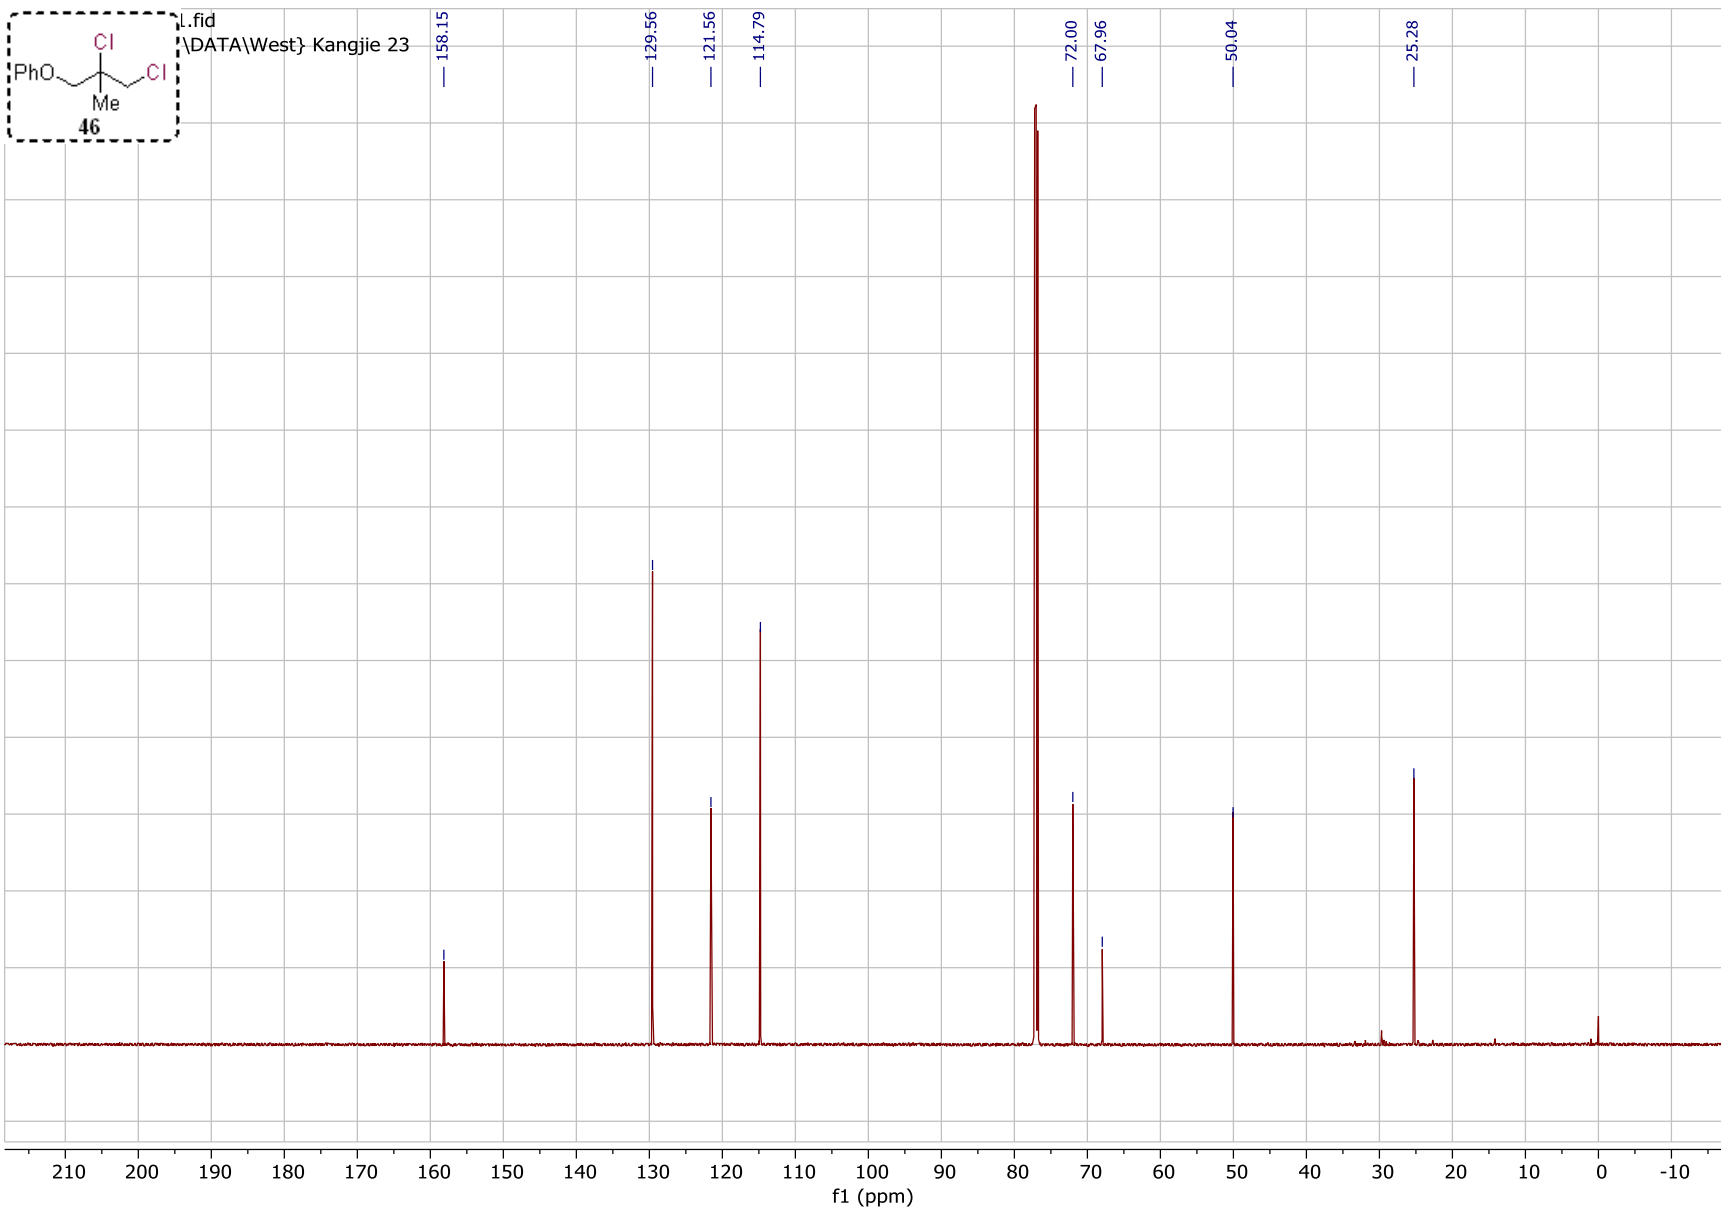

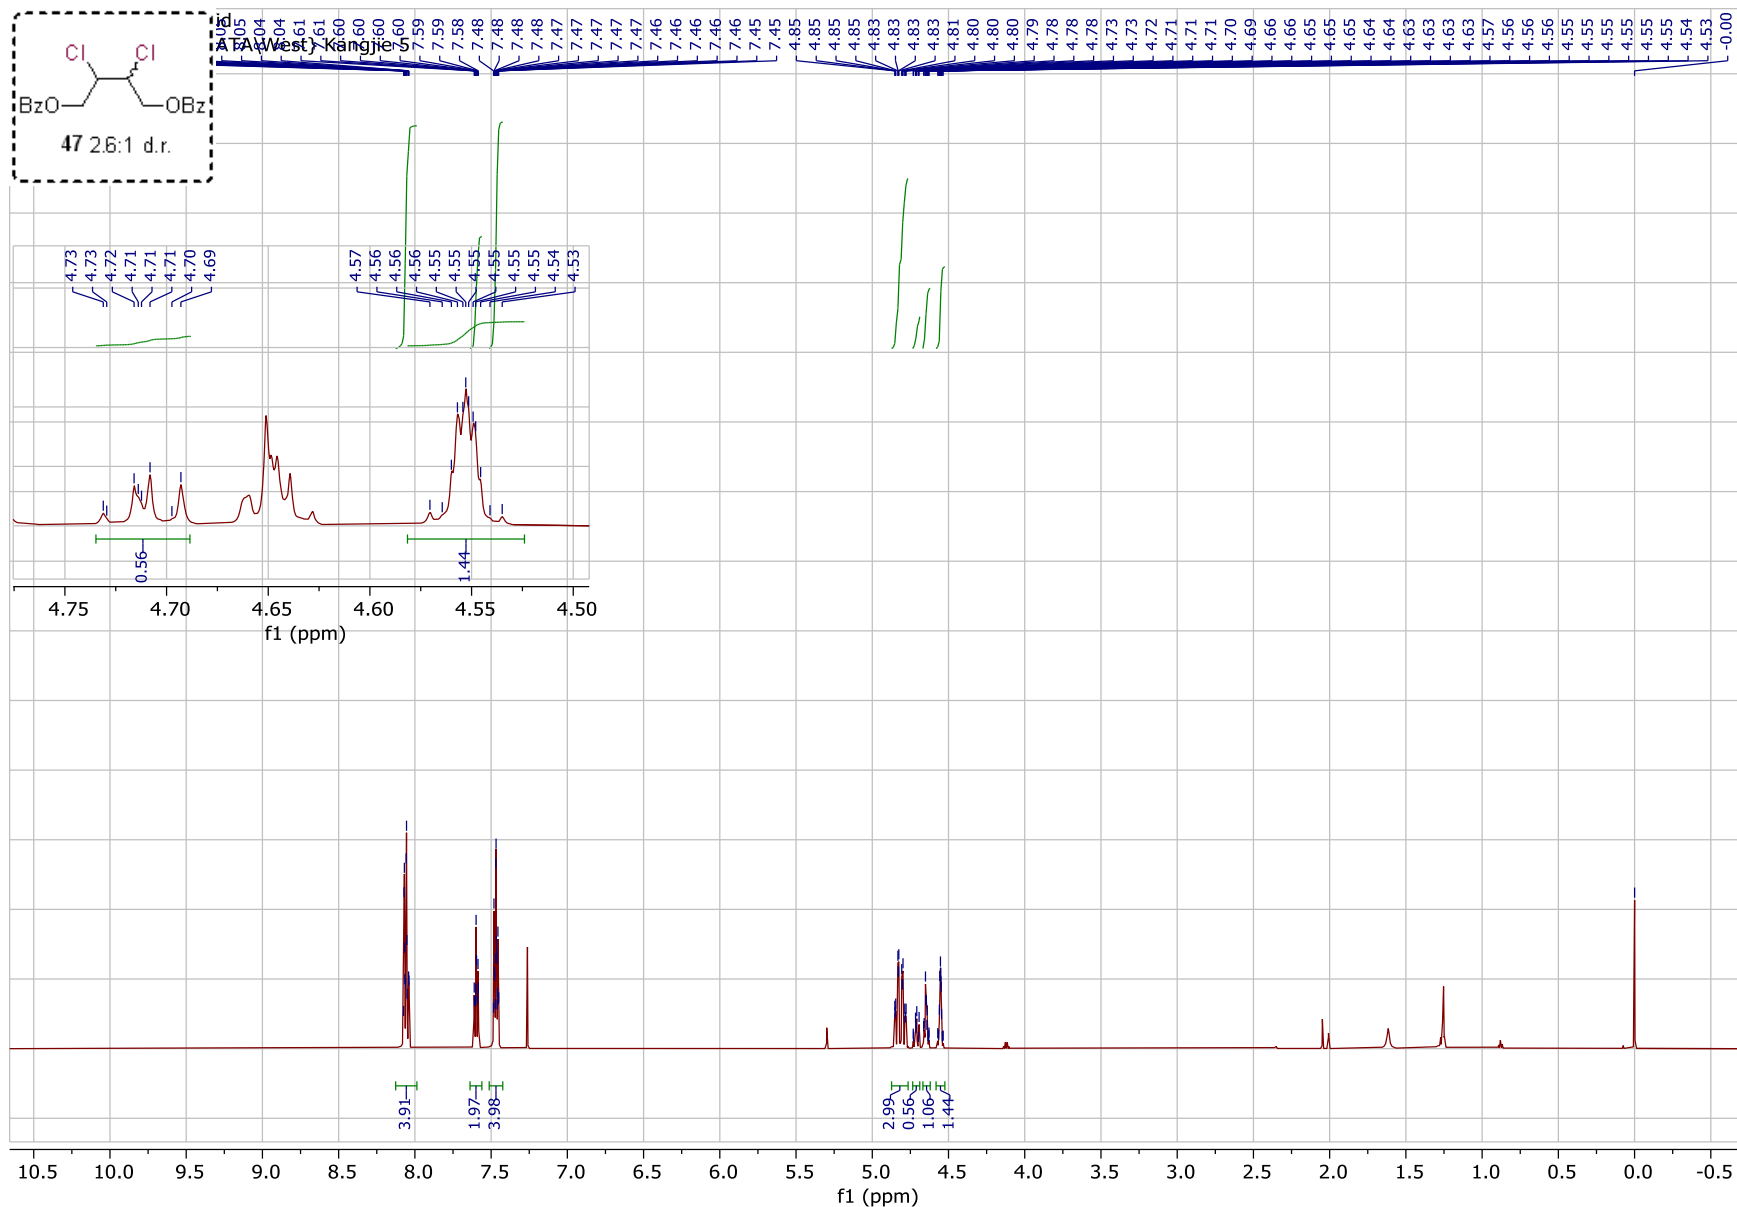

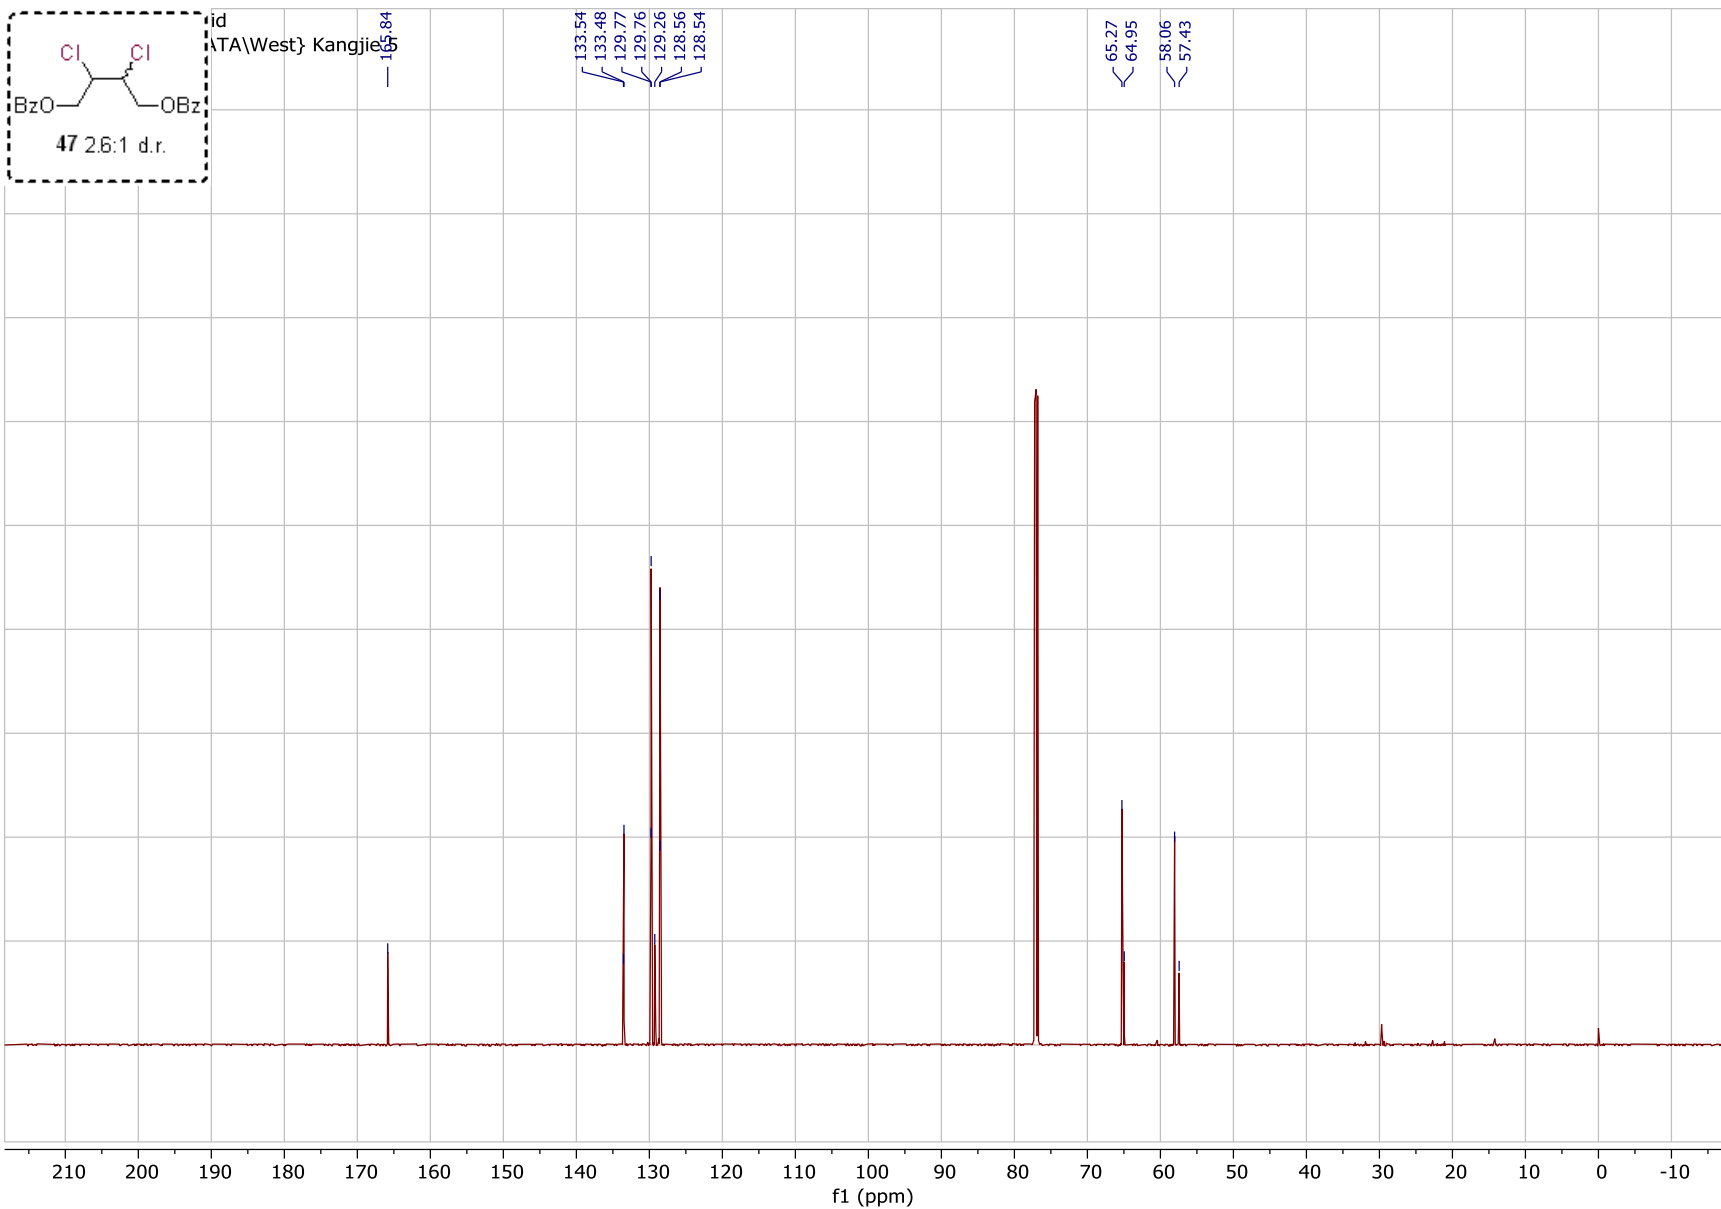

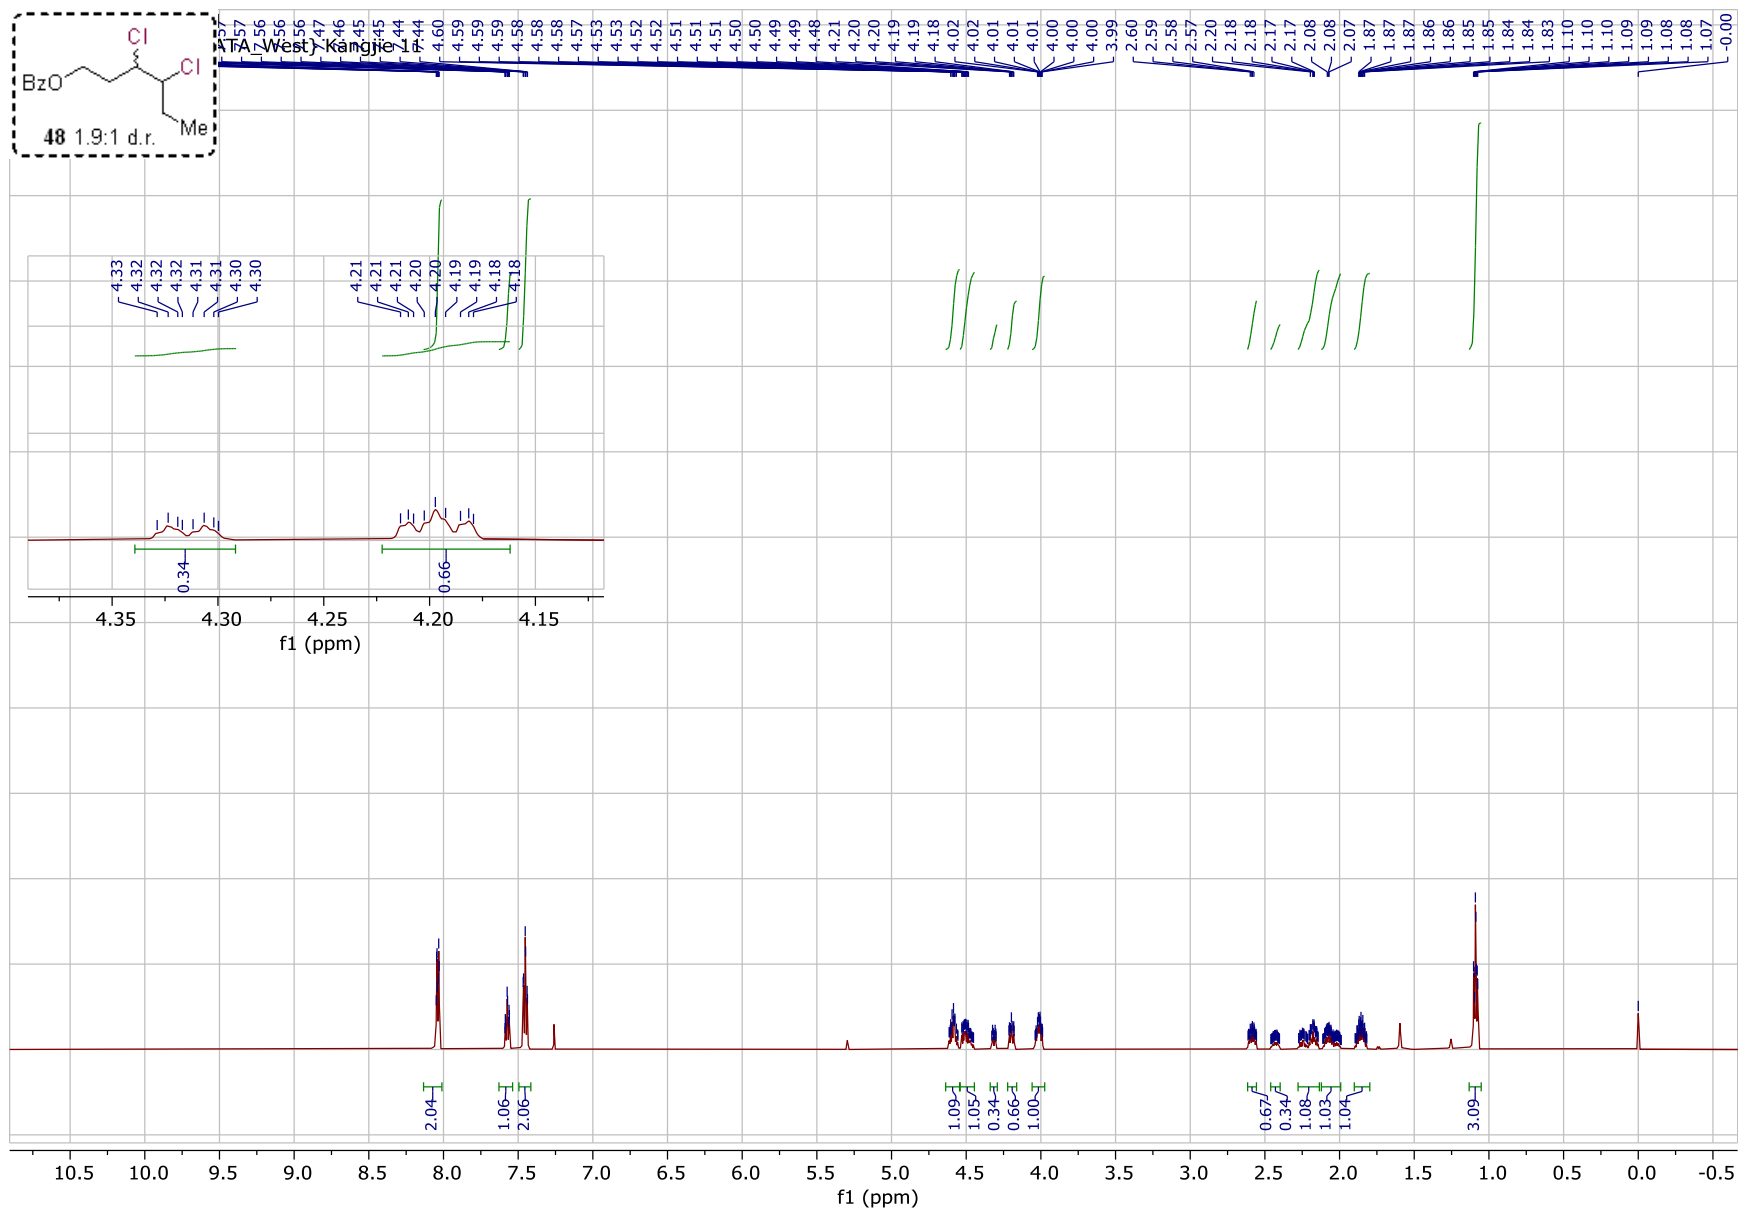

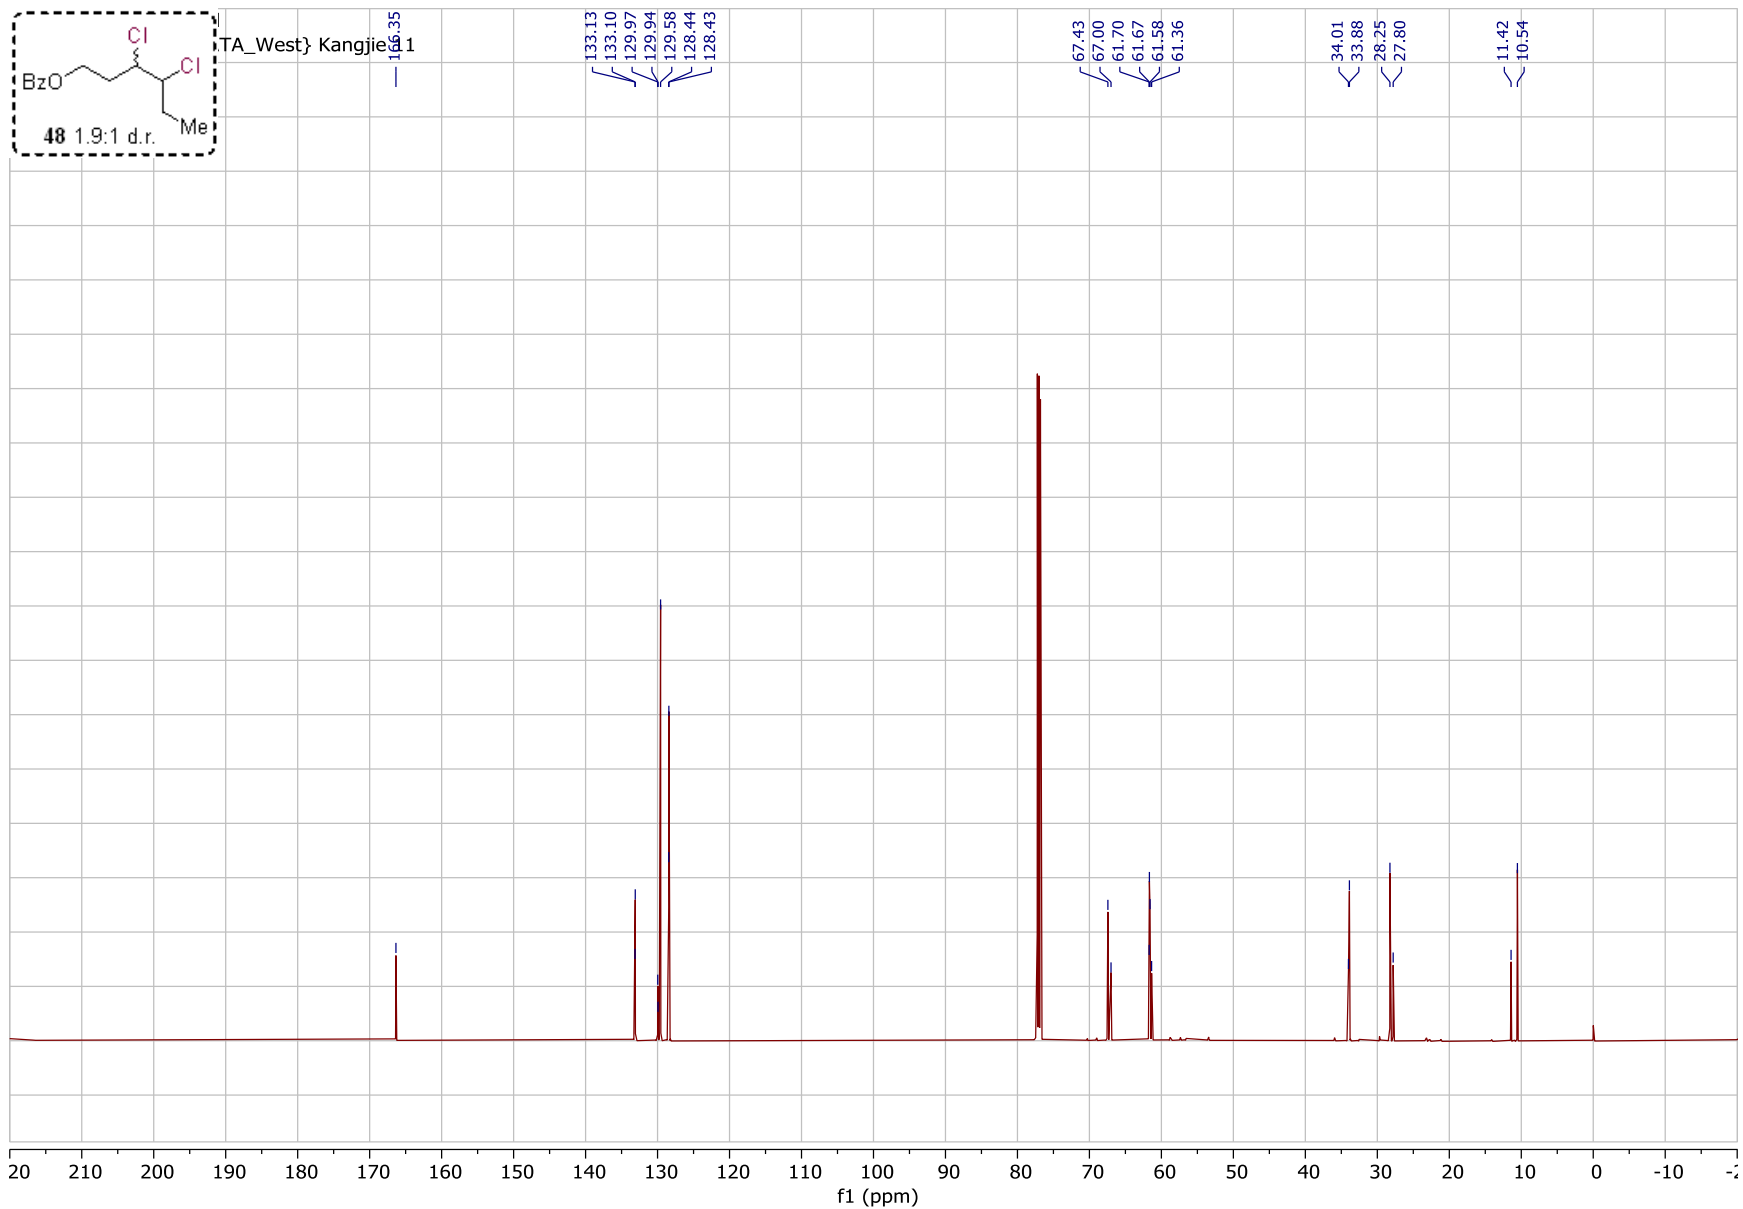

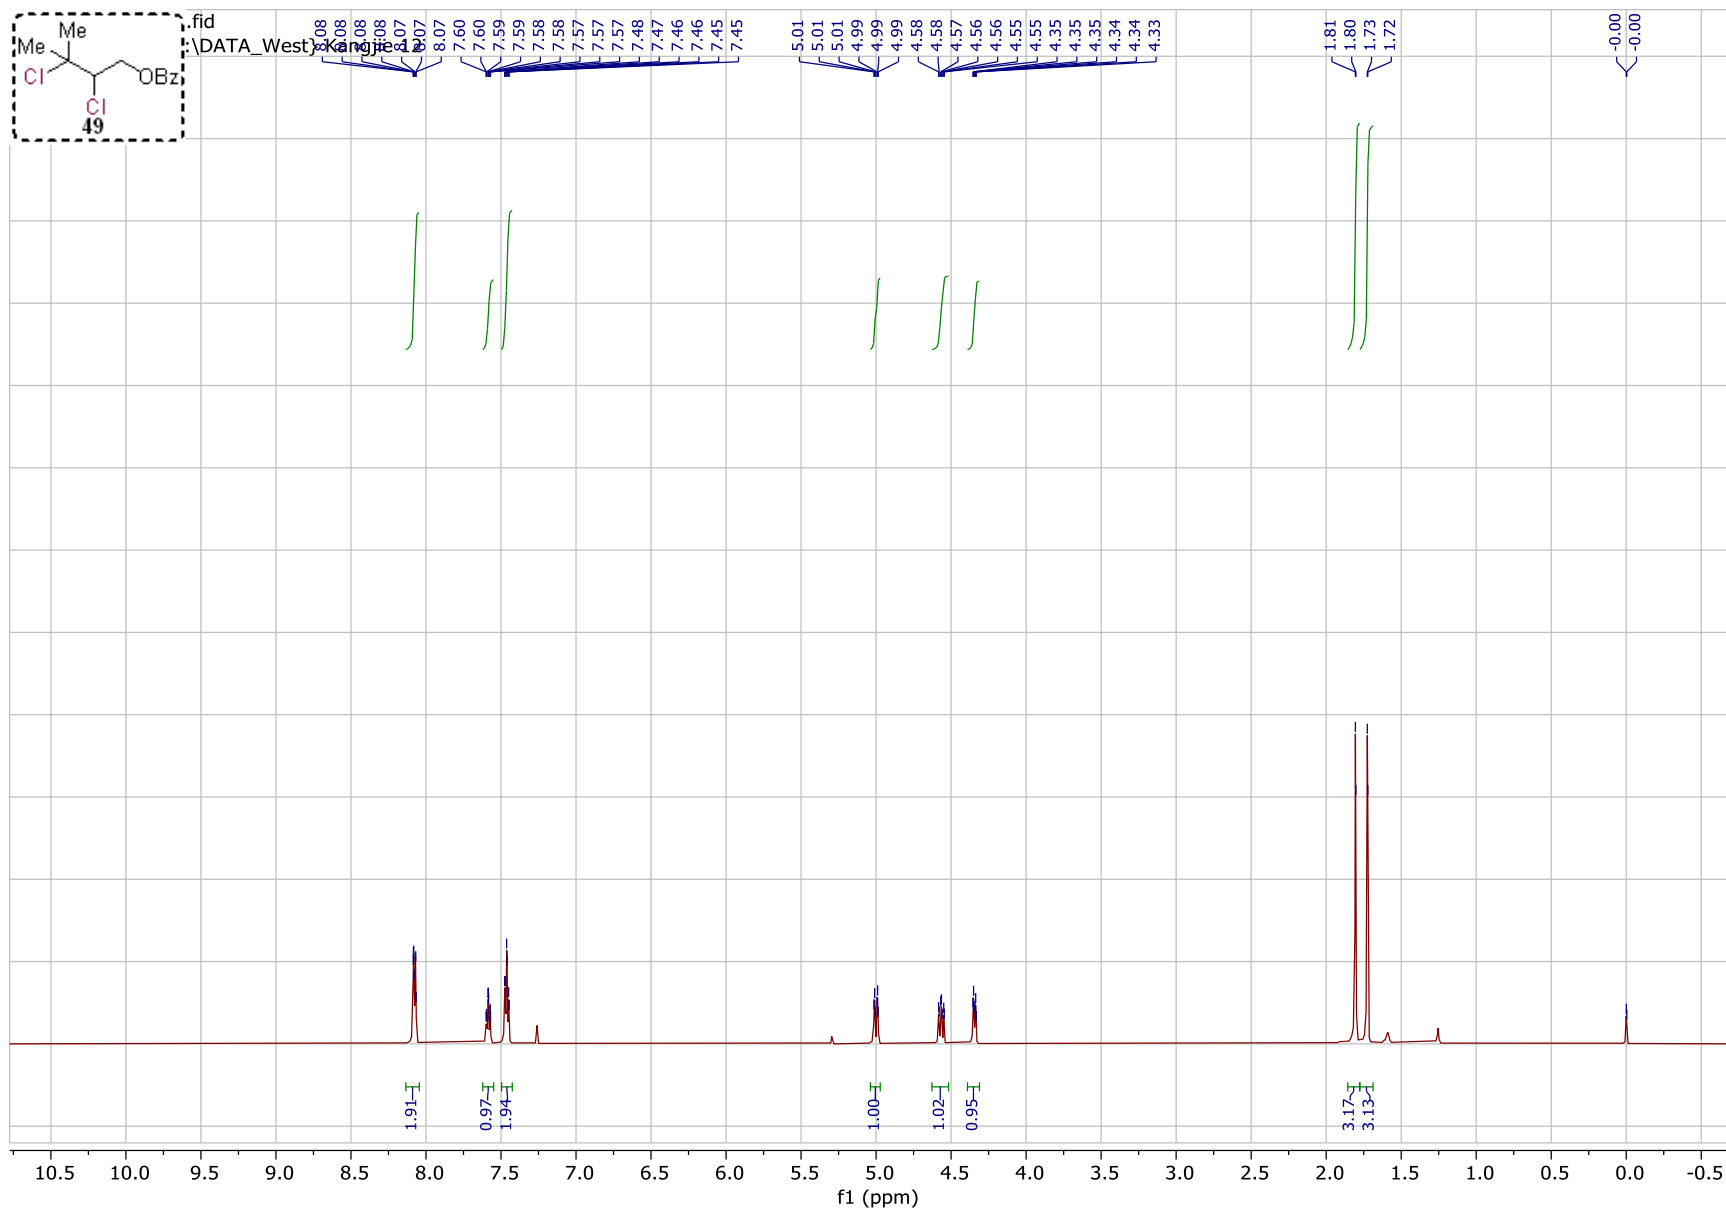

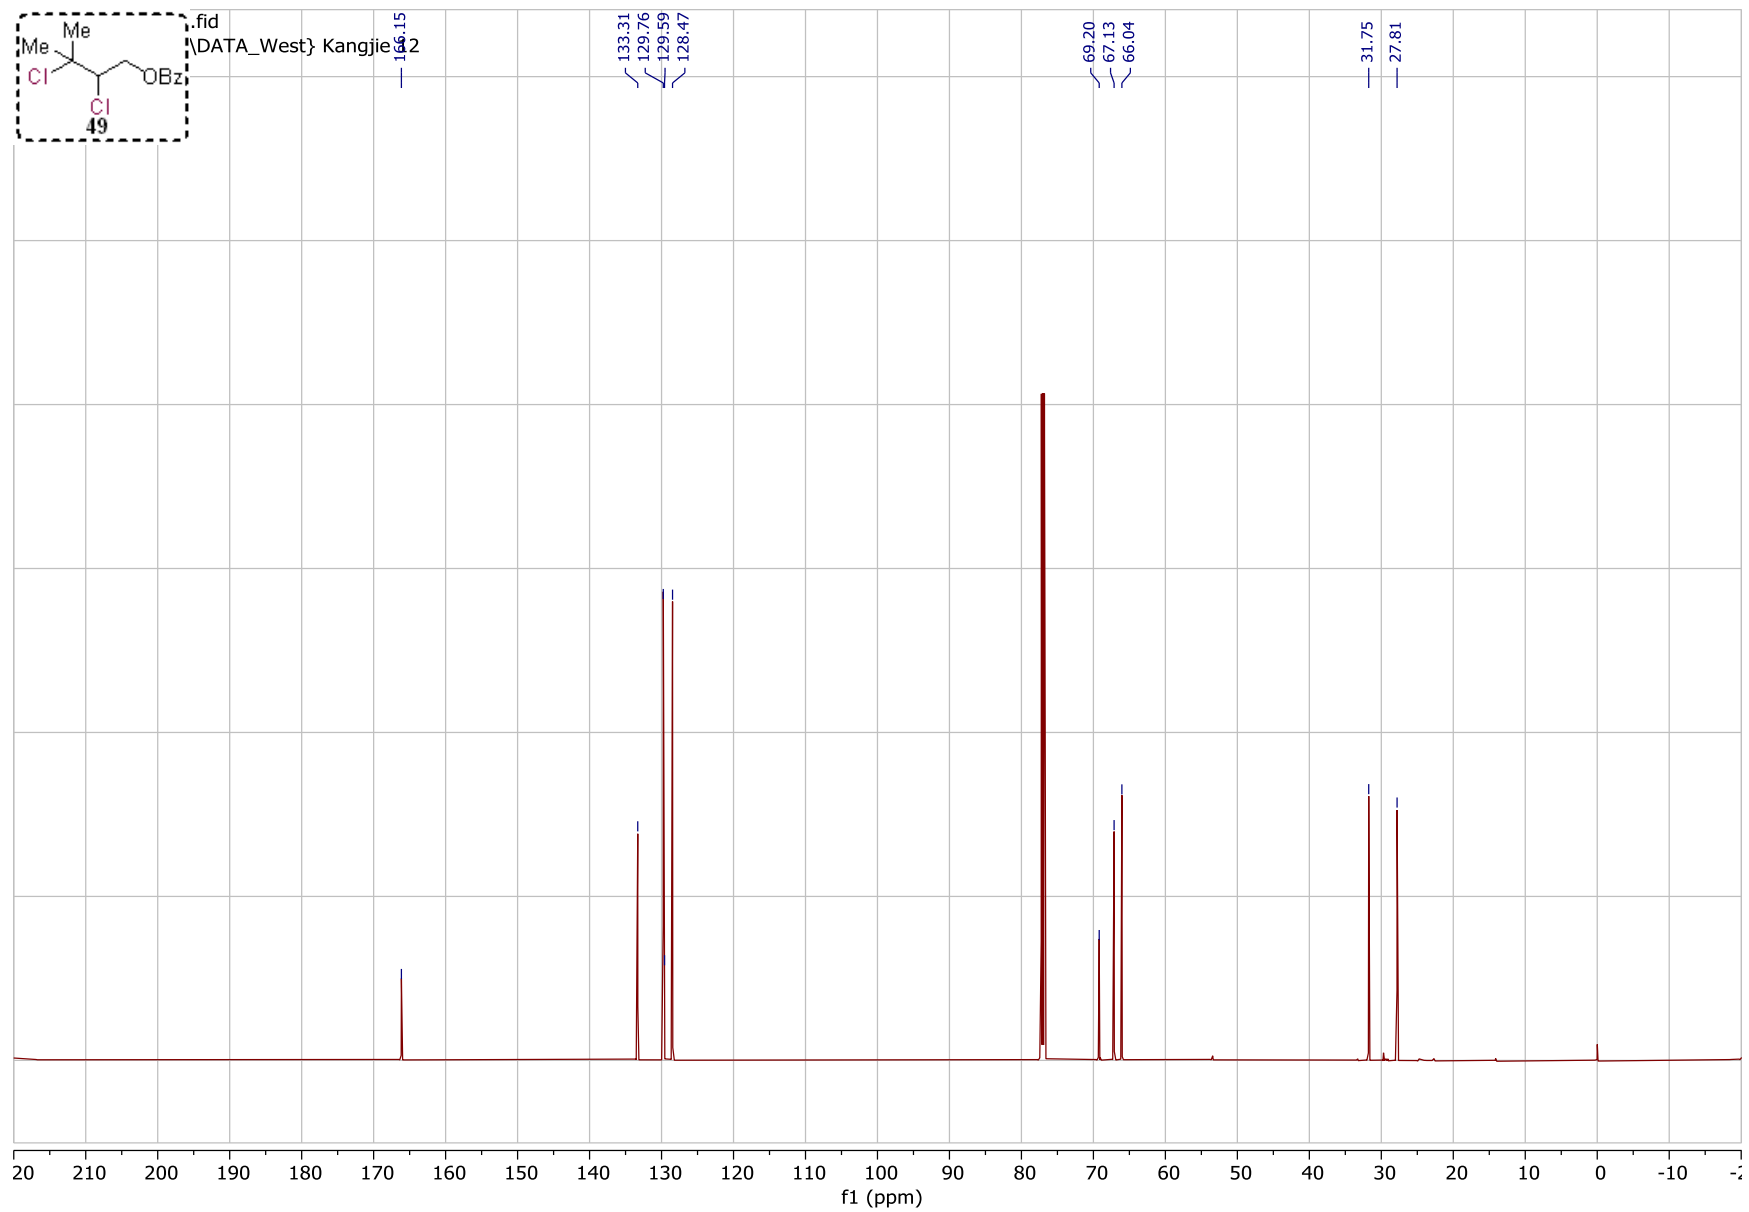

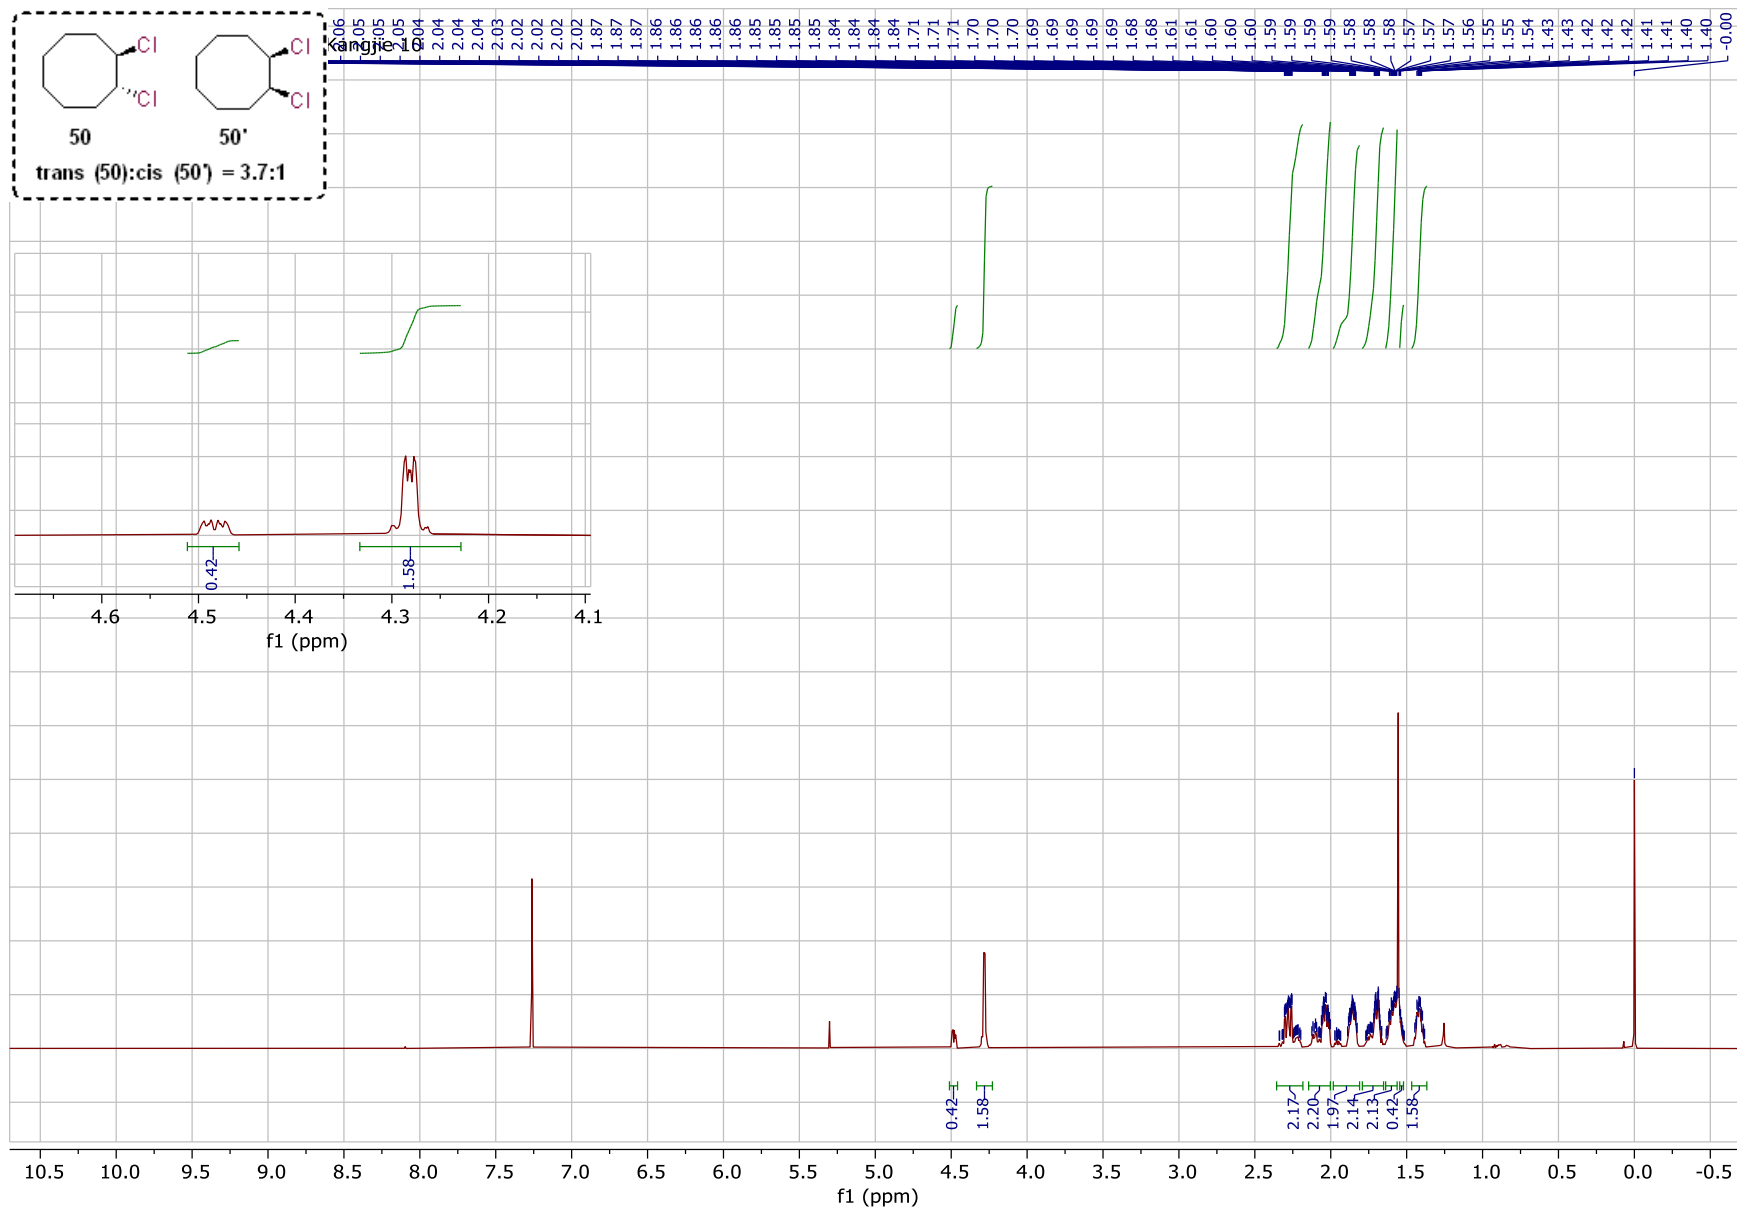



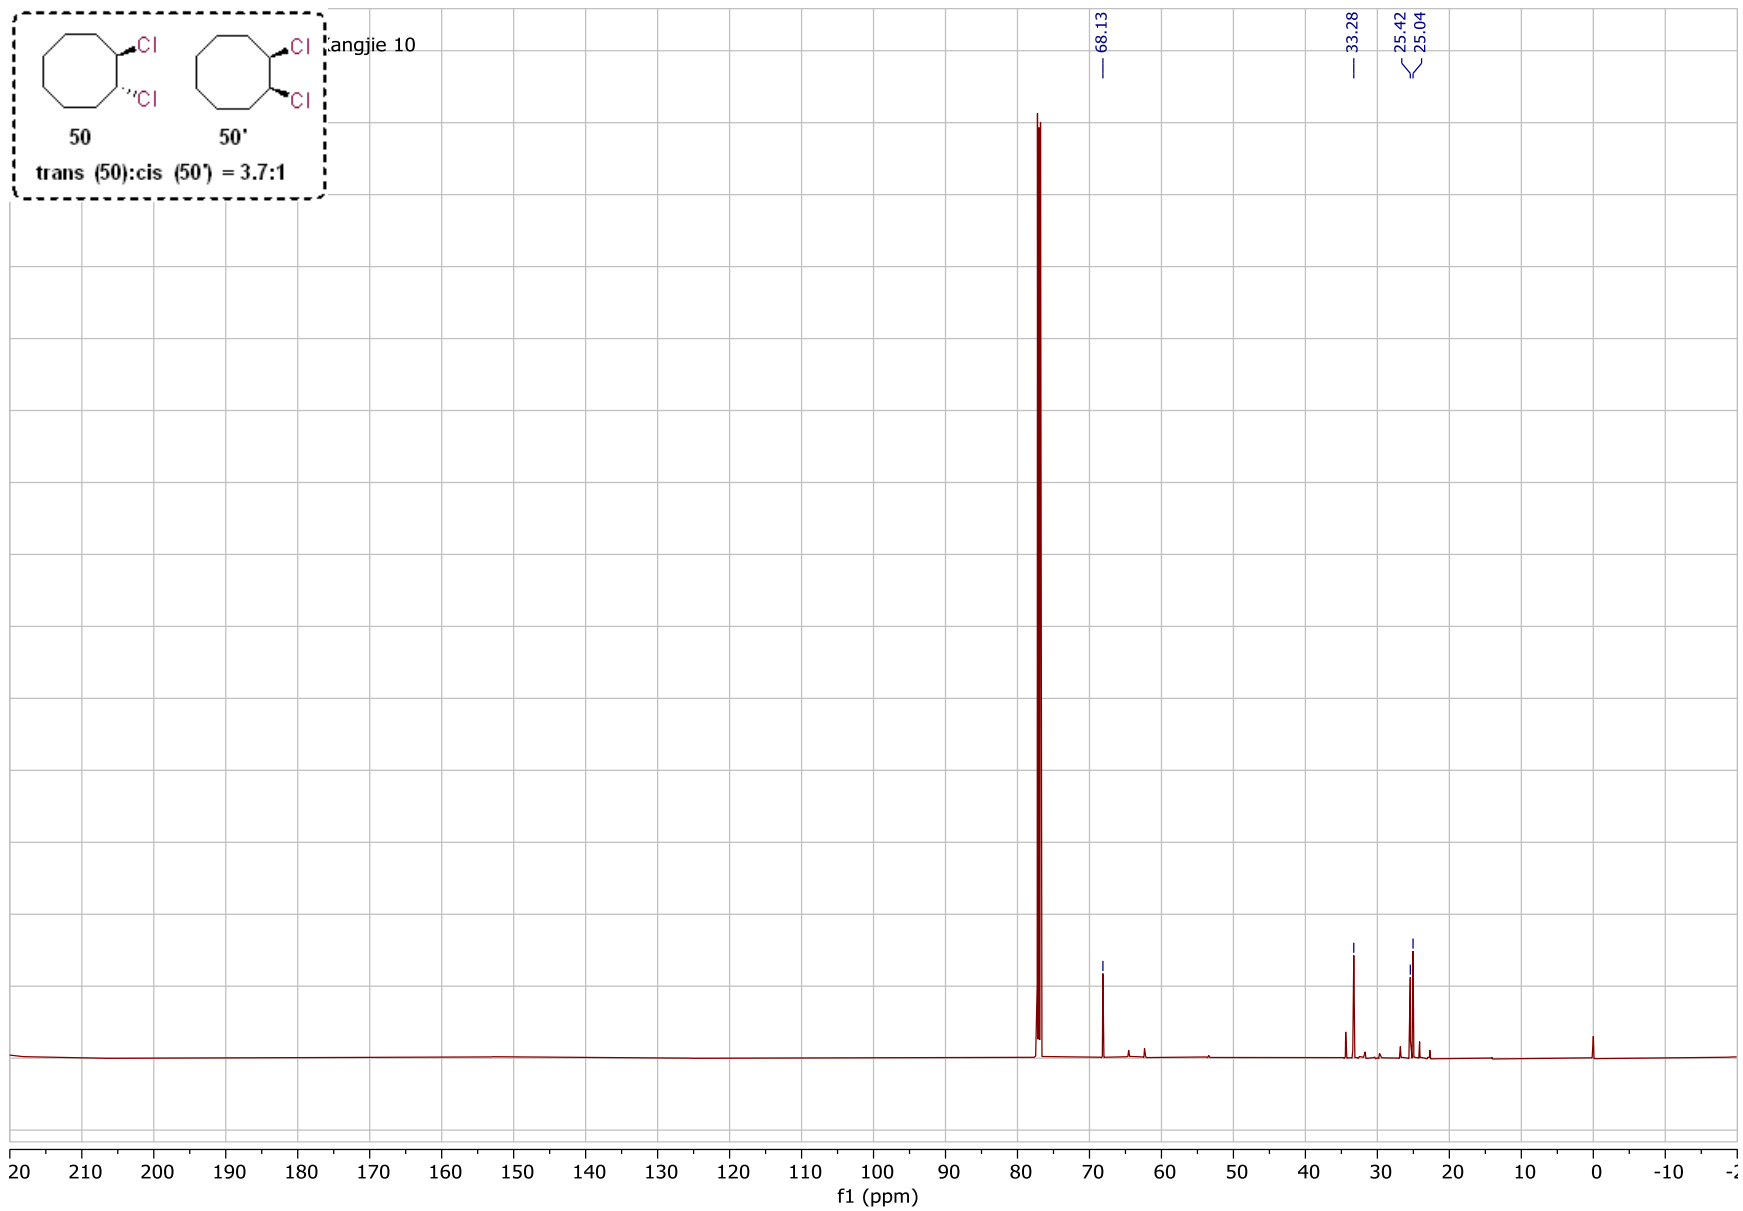

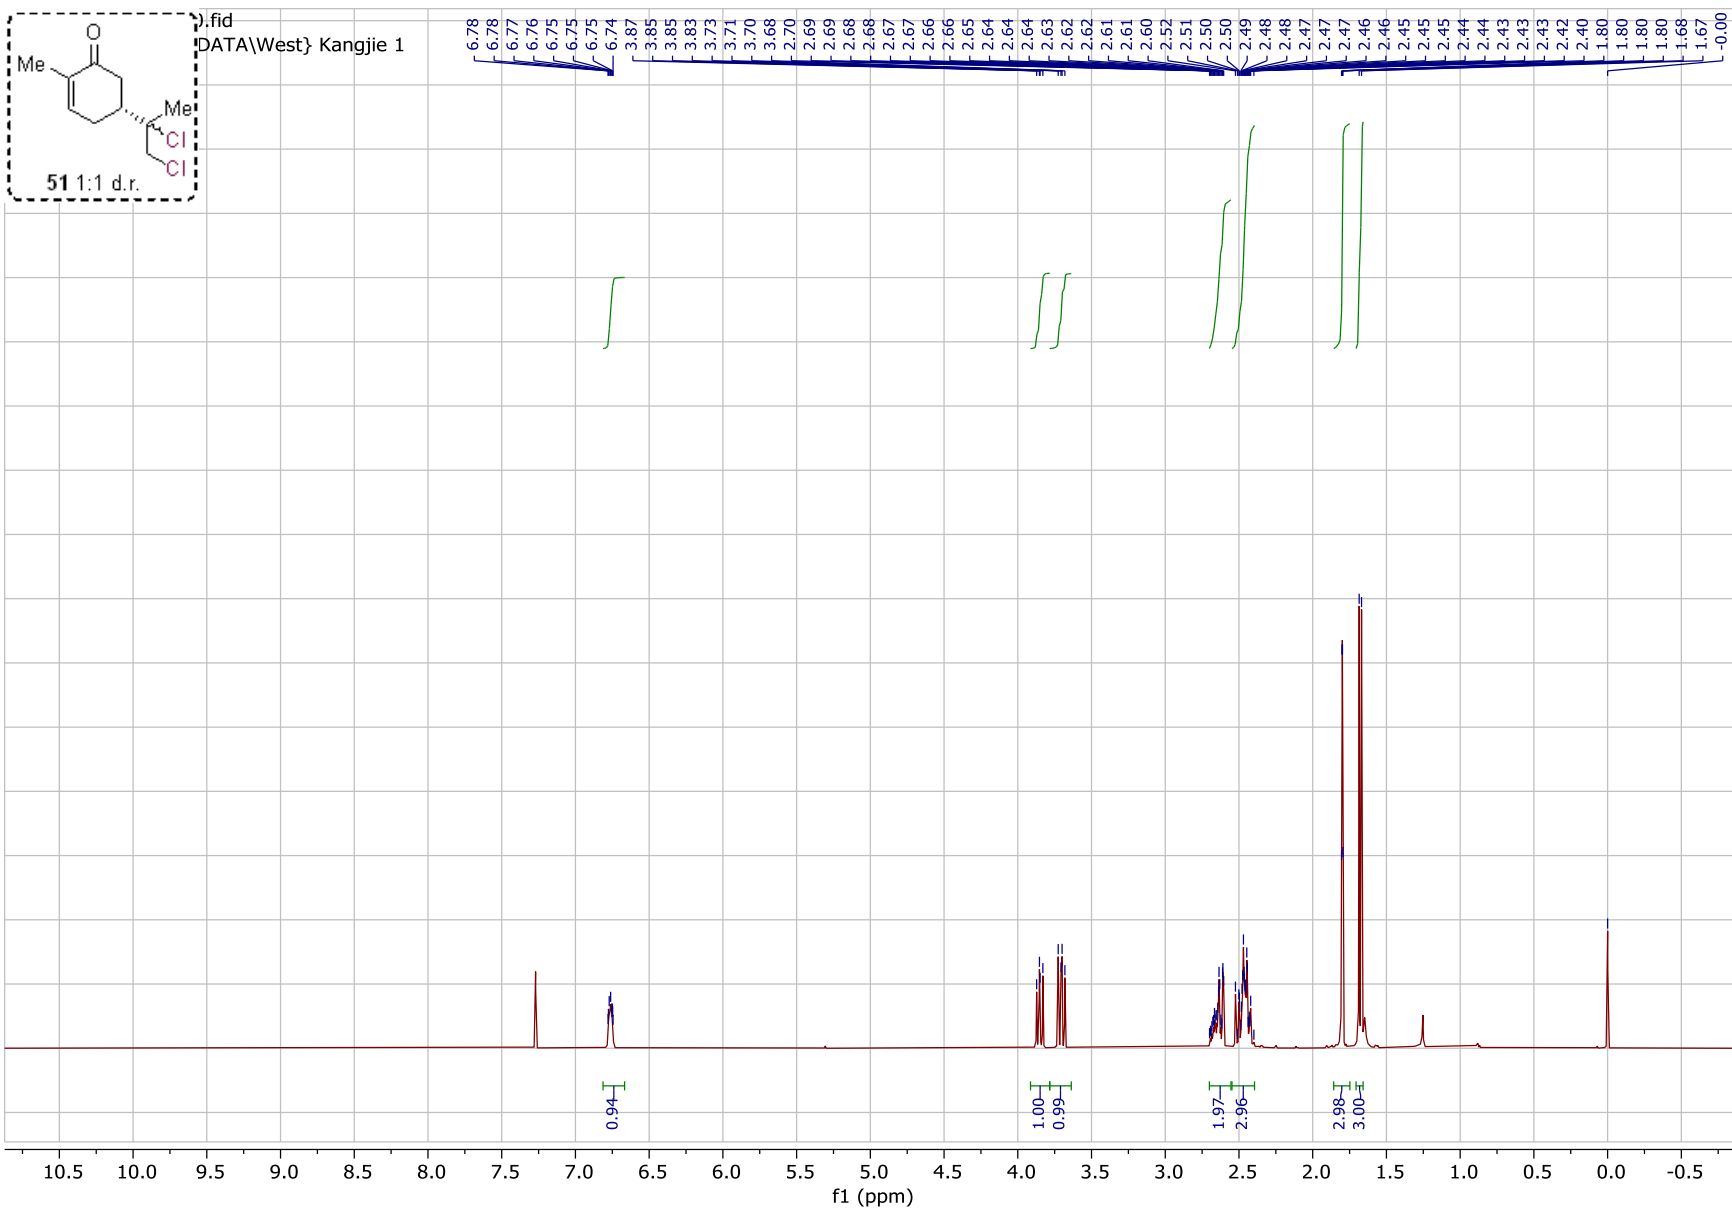

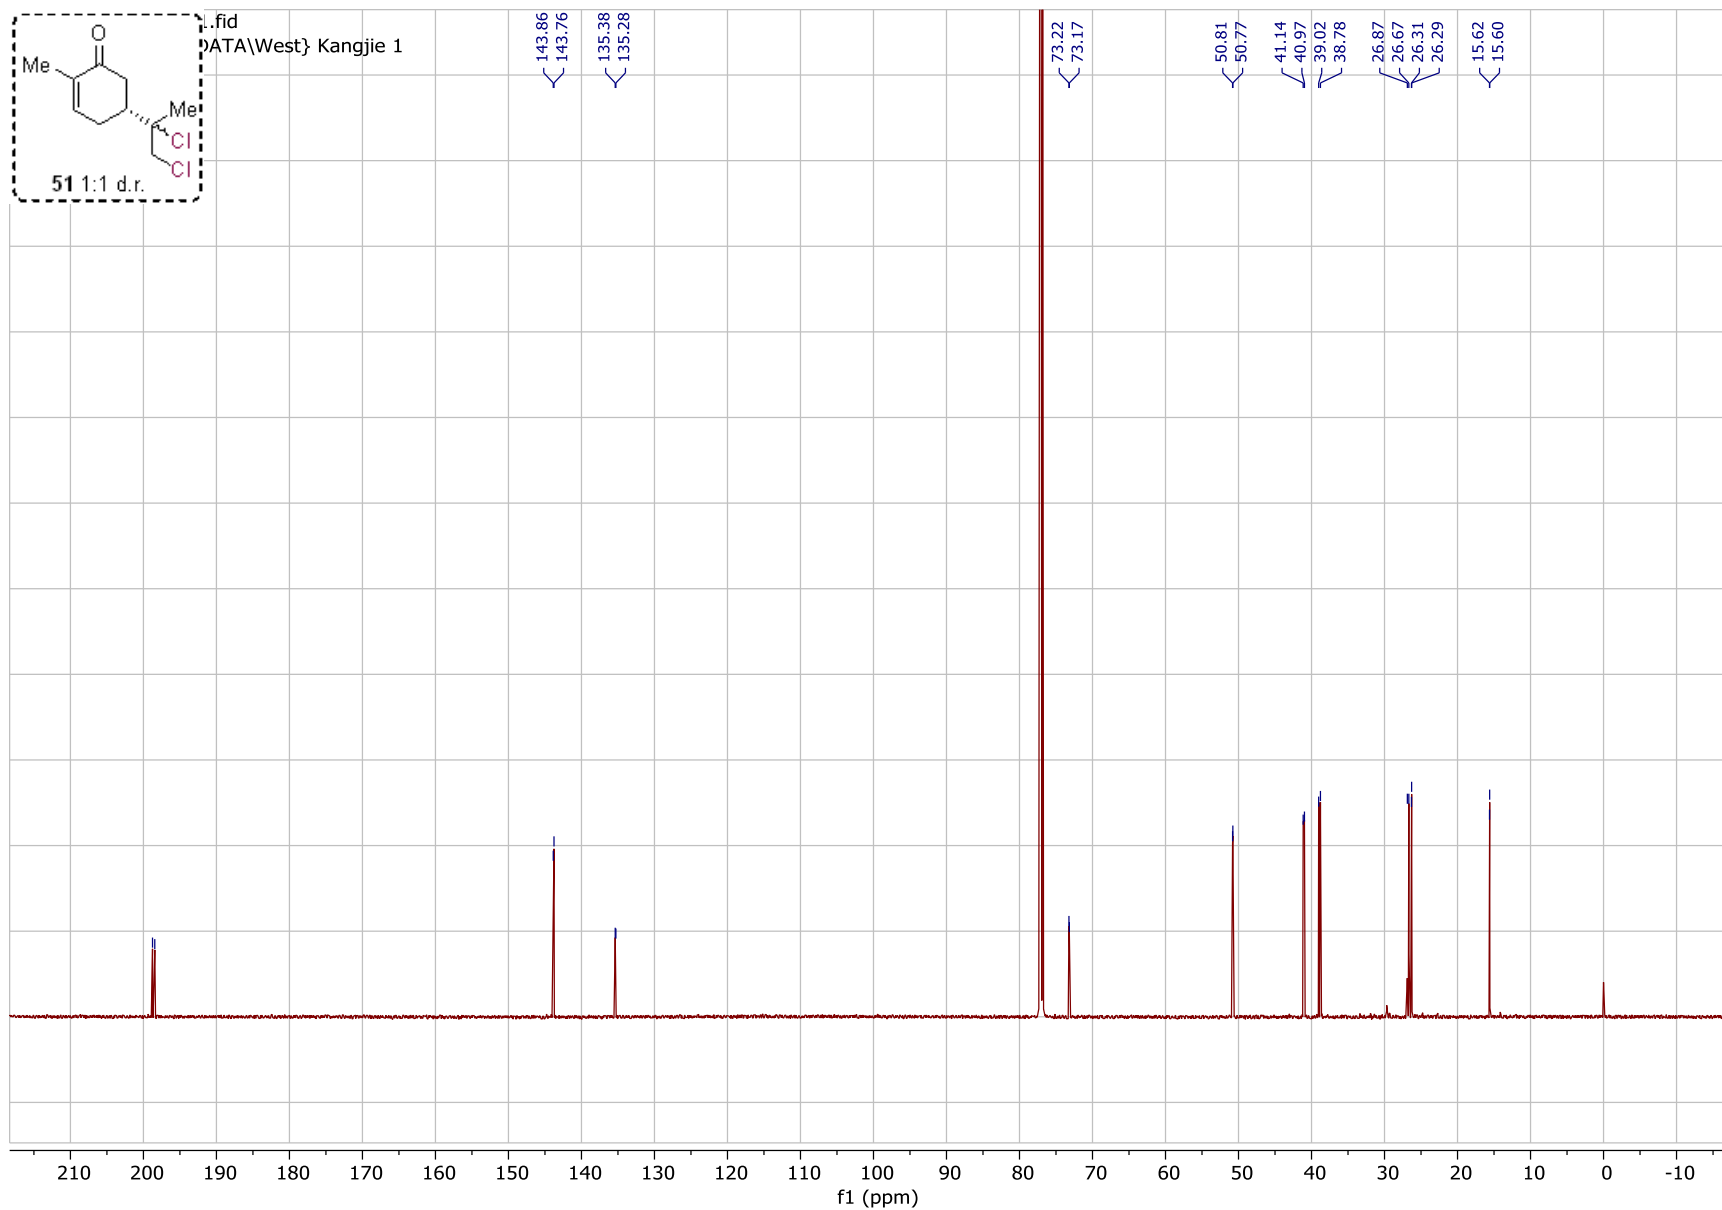

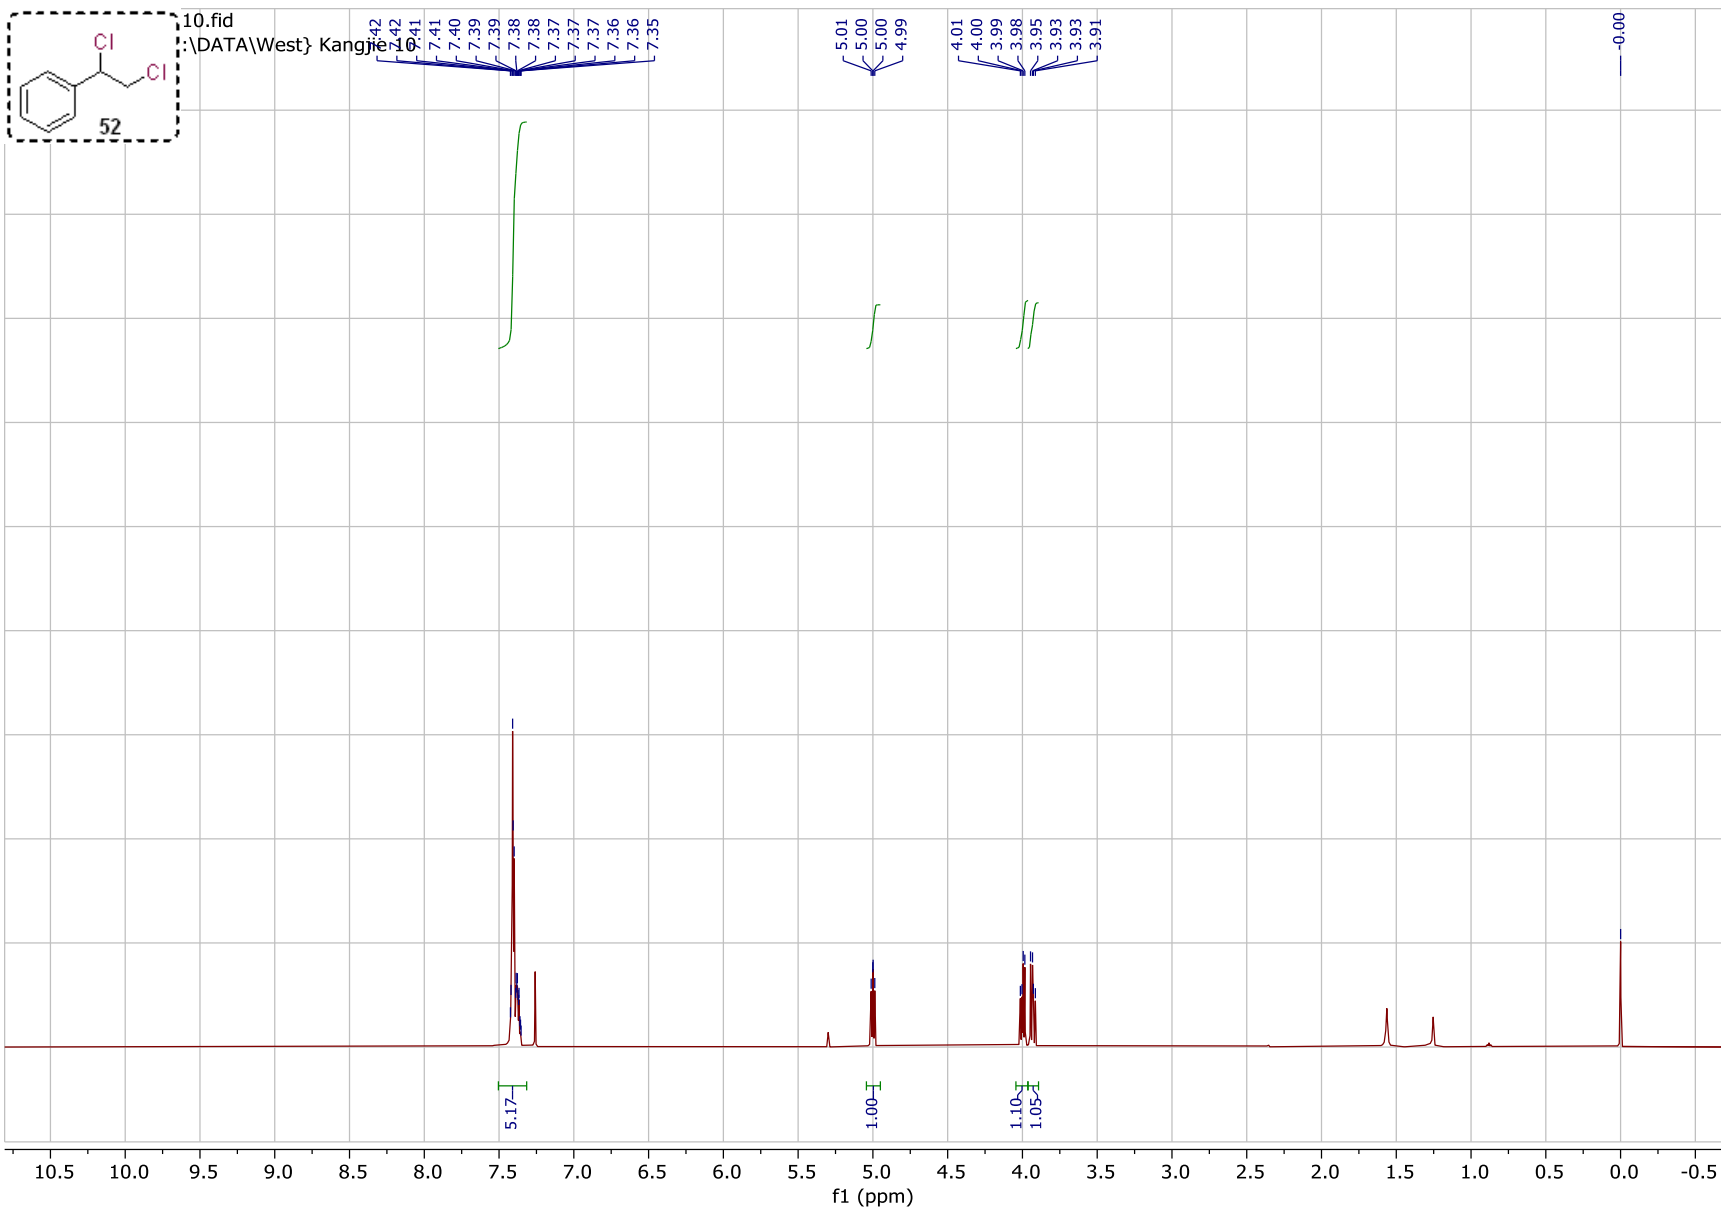

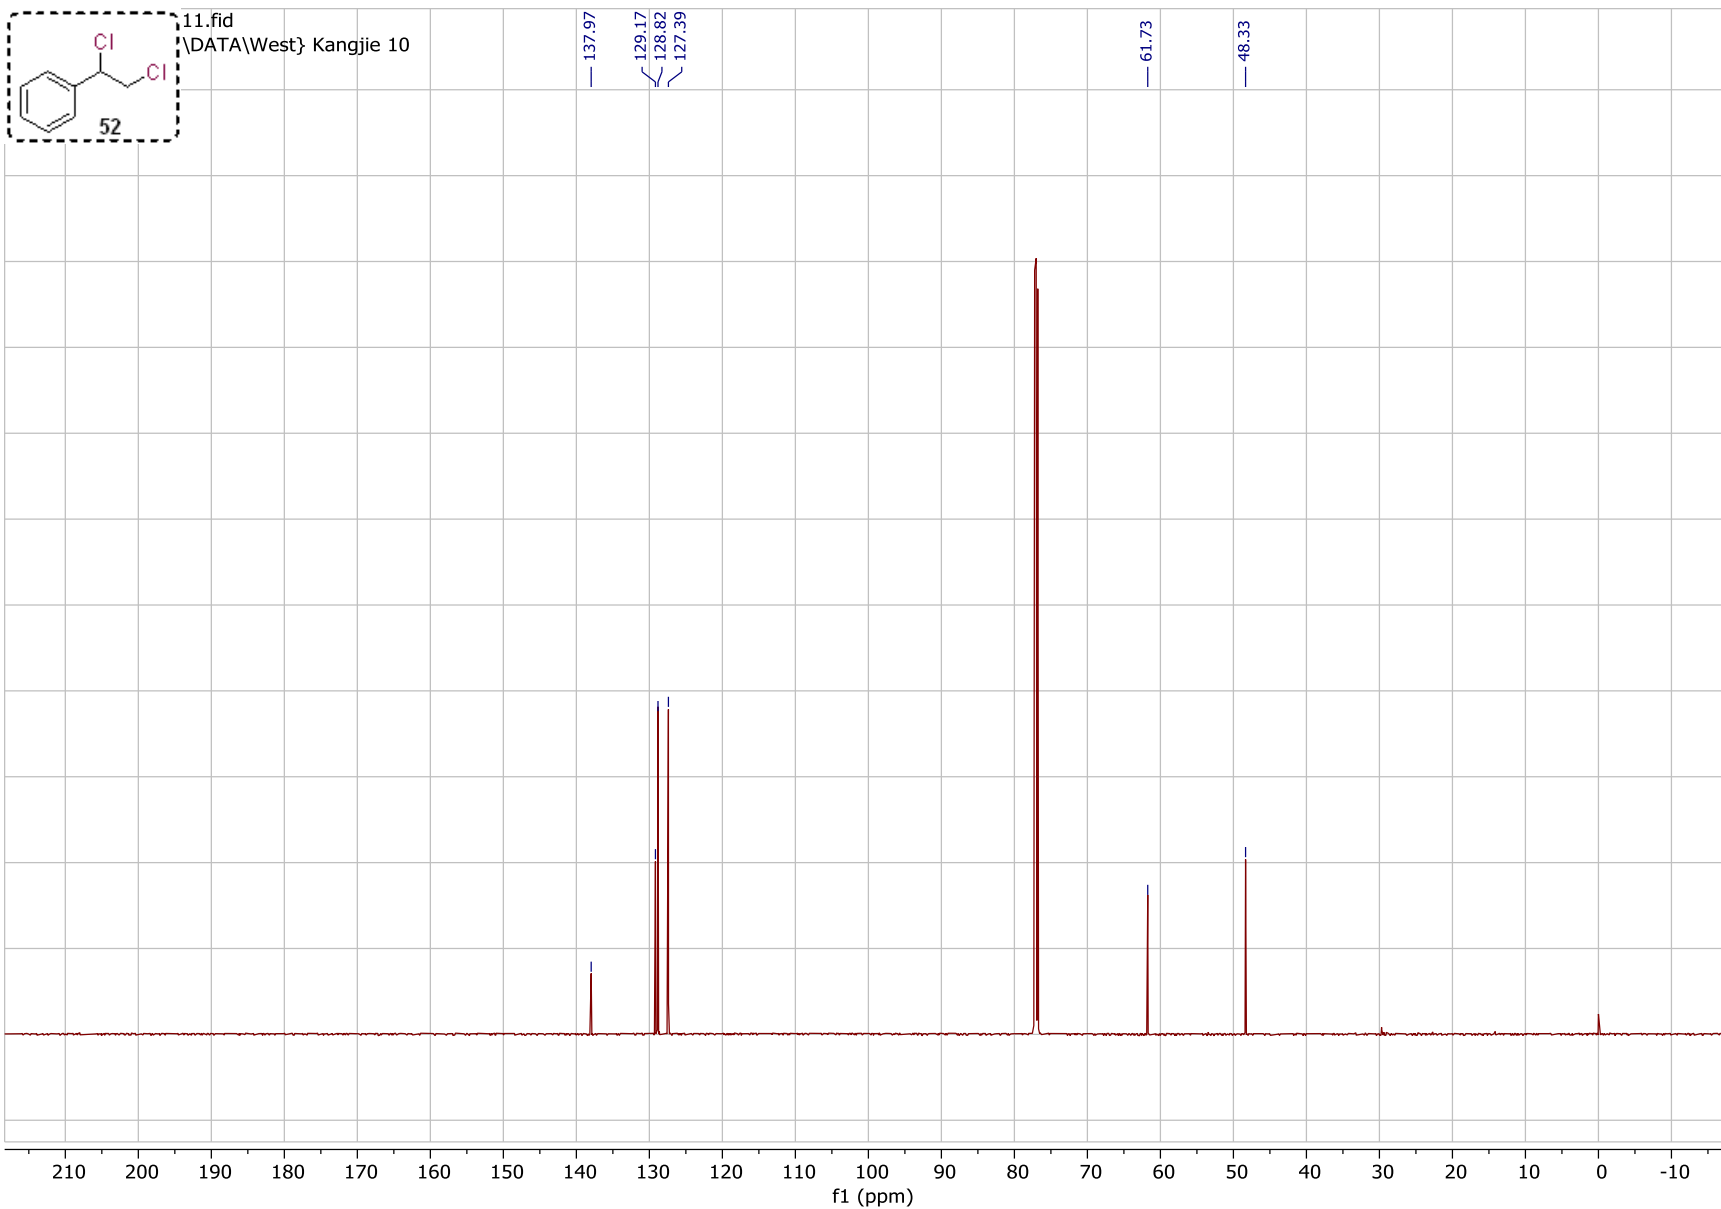

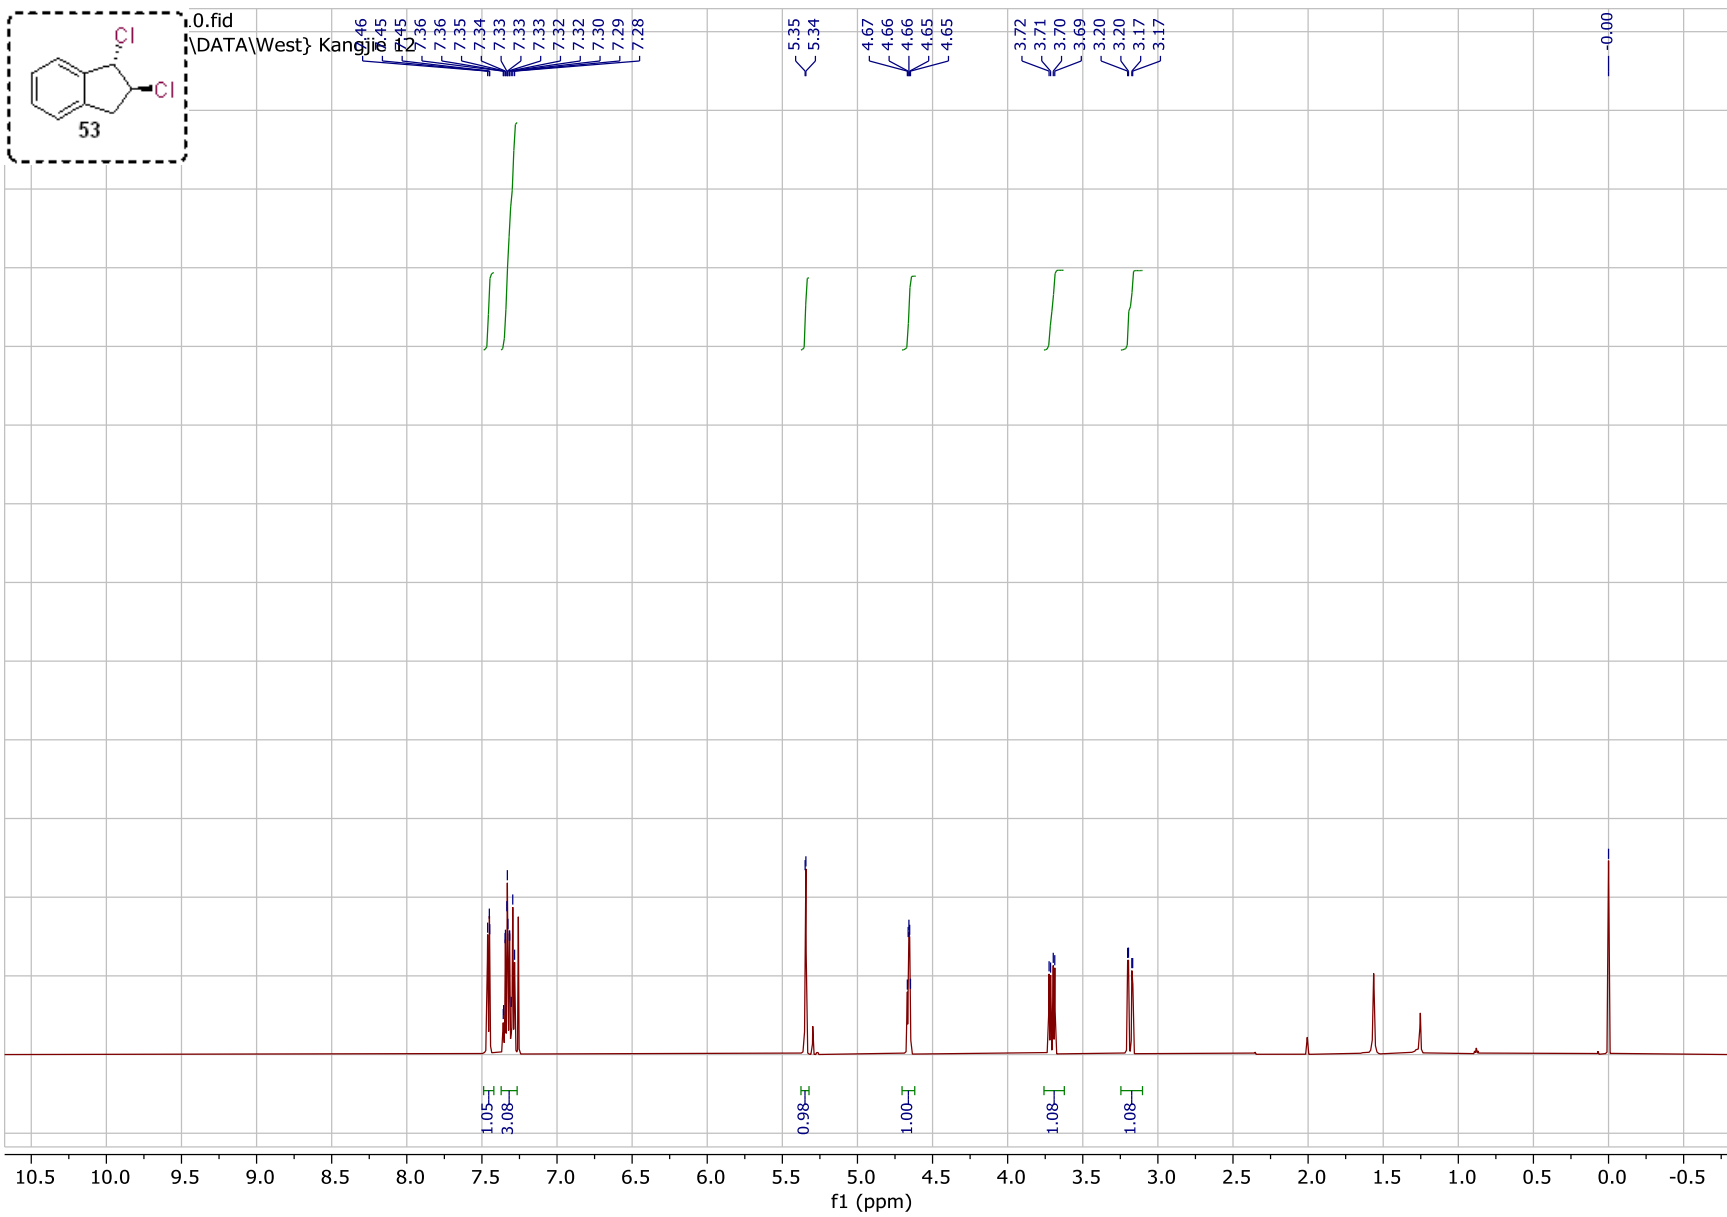

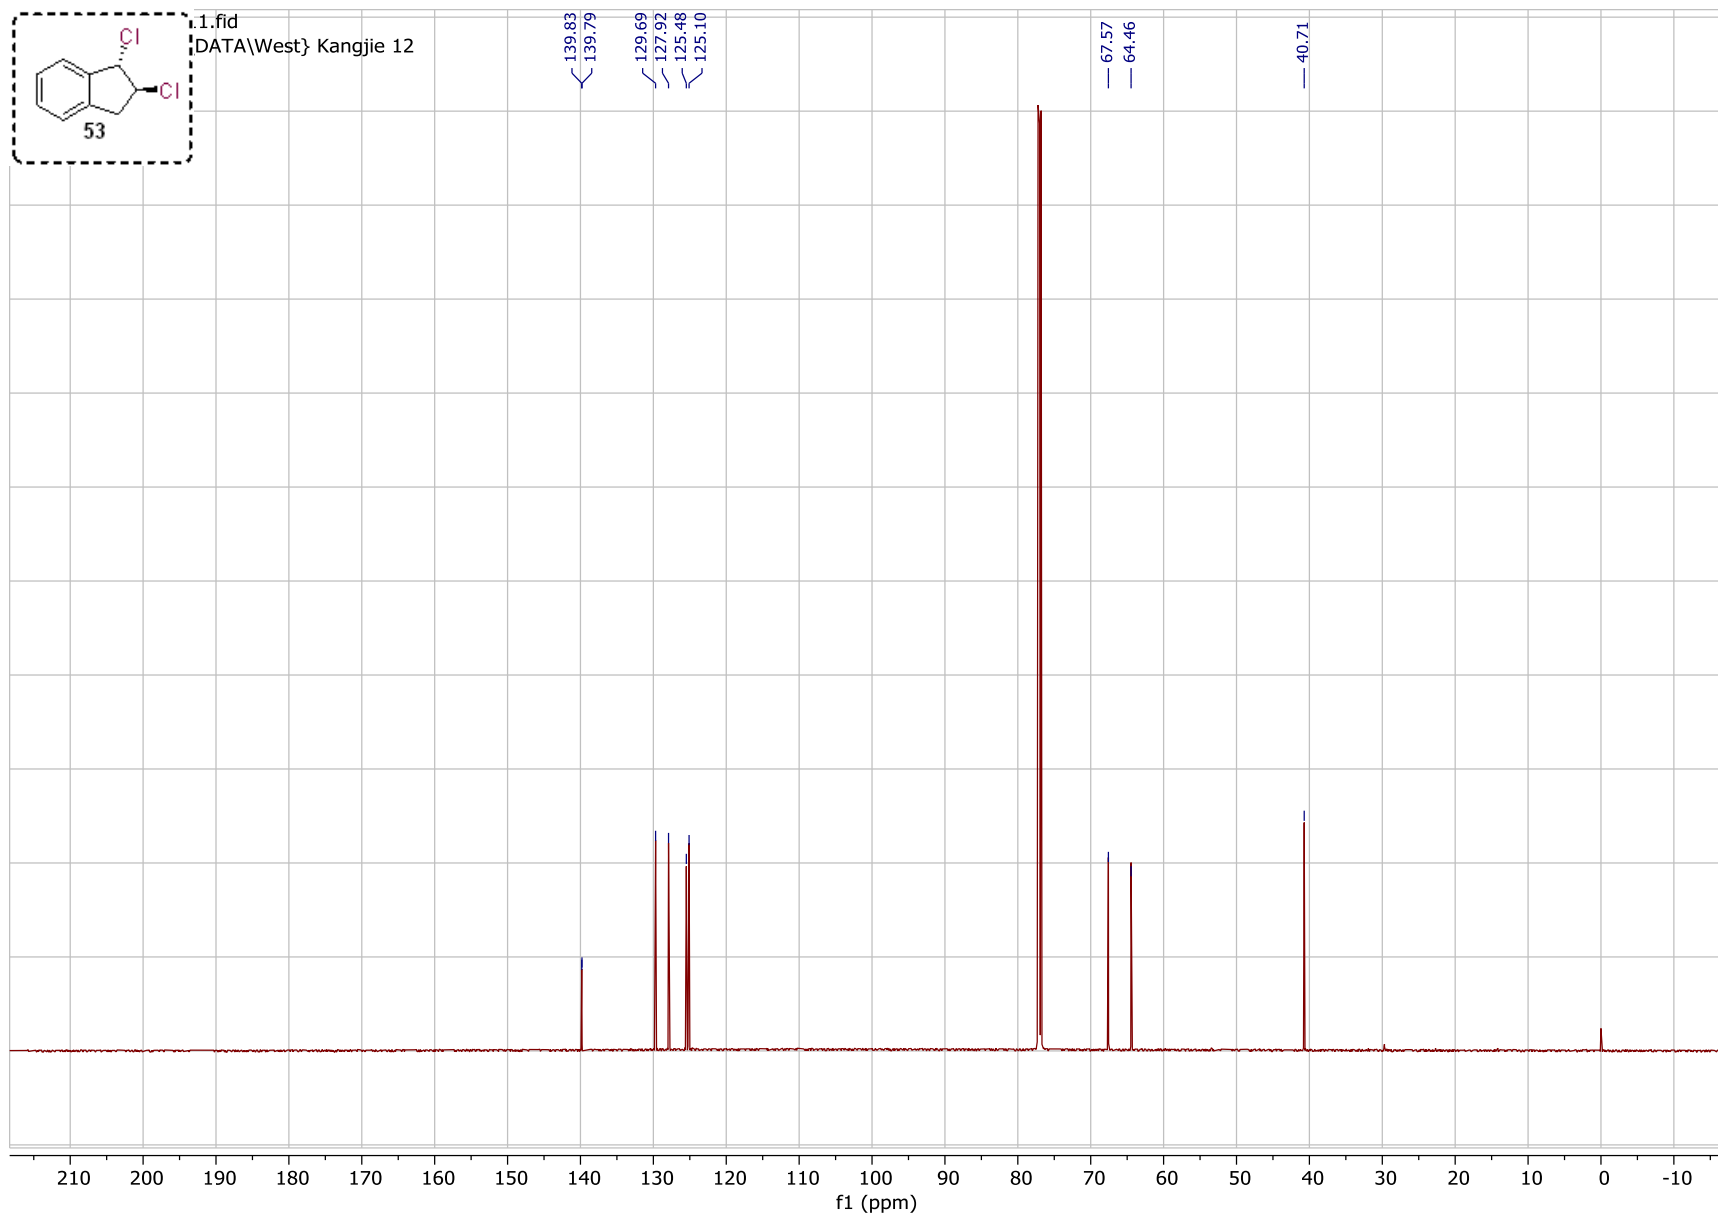

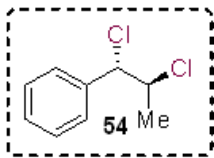

TA\_West} Kangjie 18

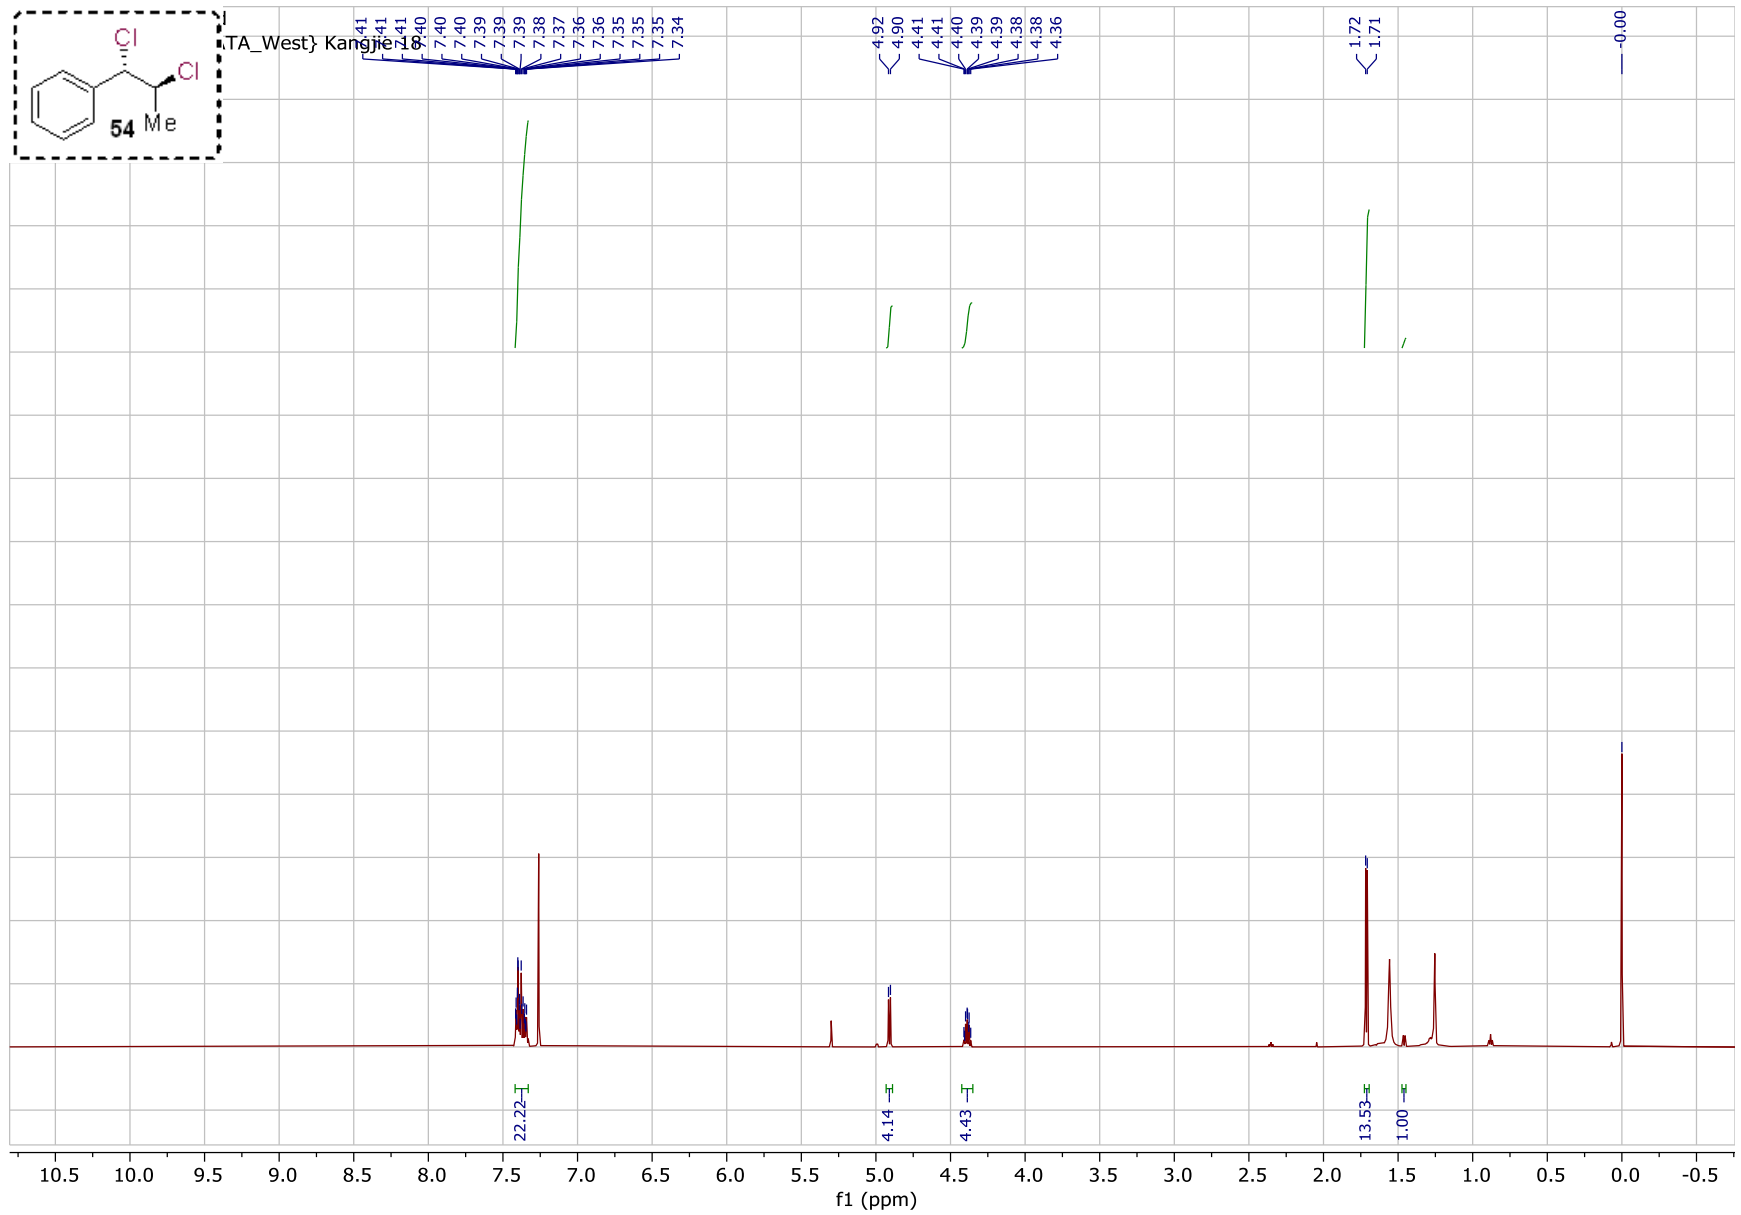



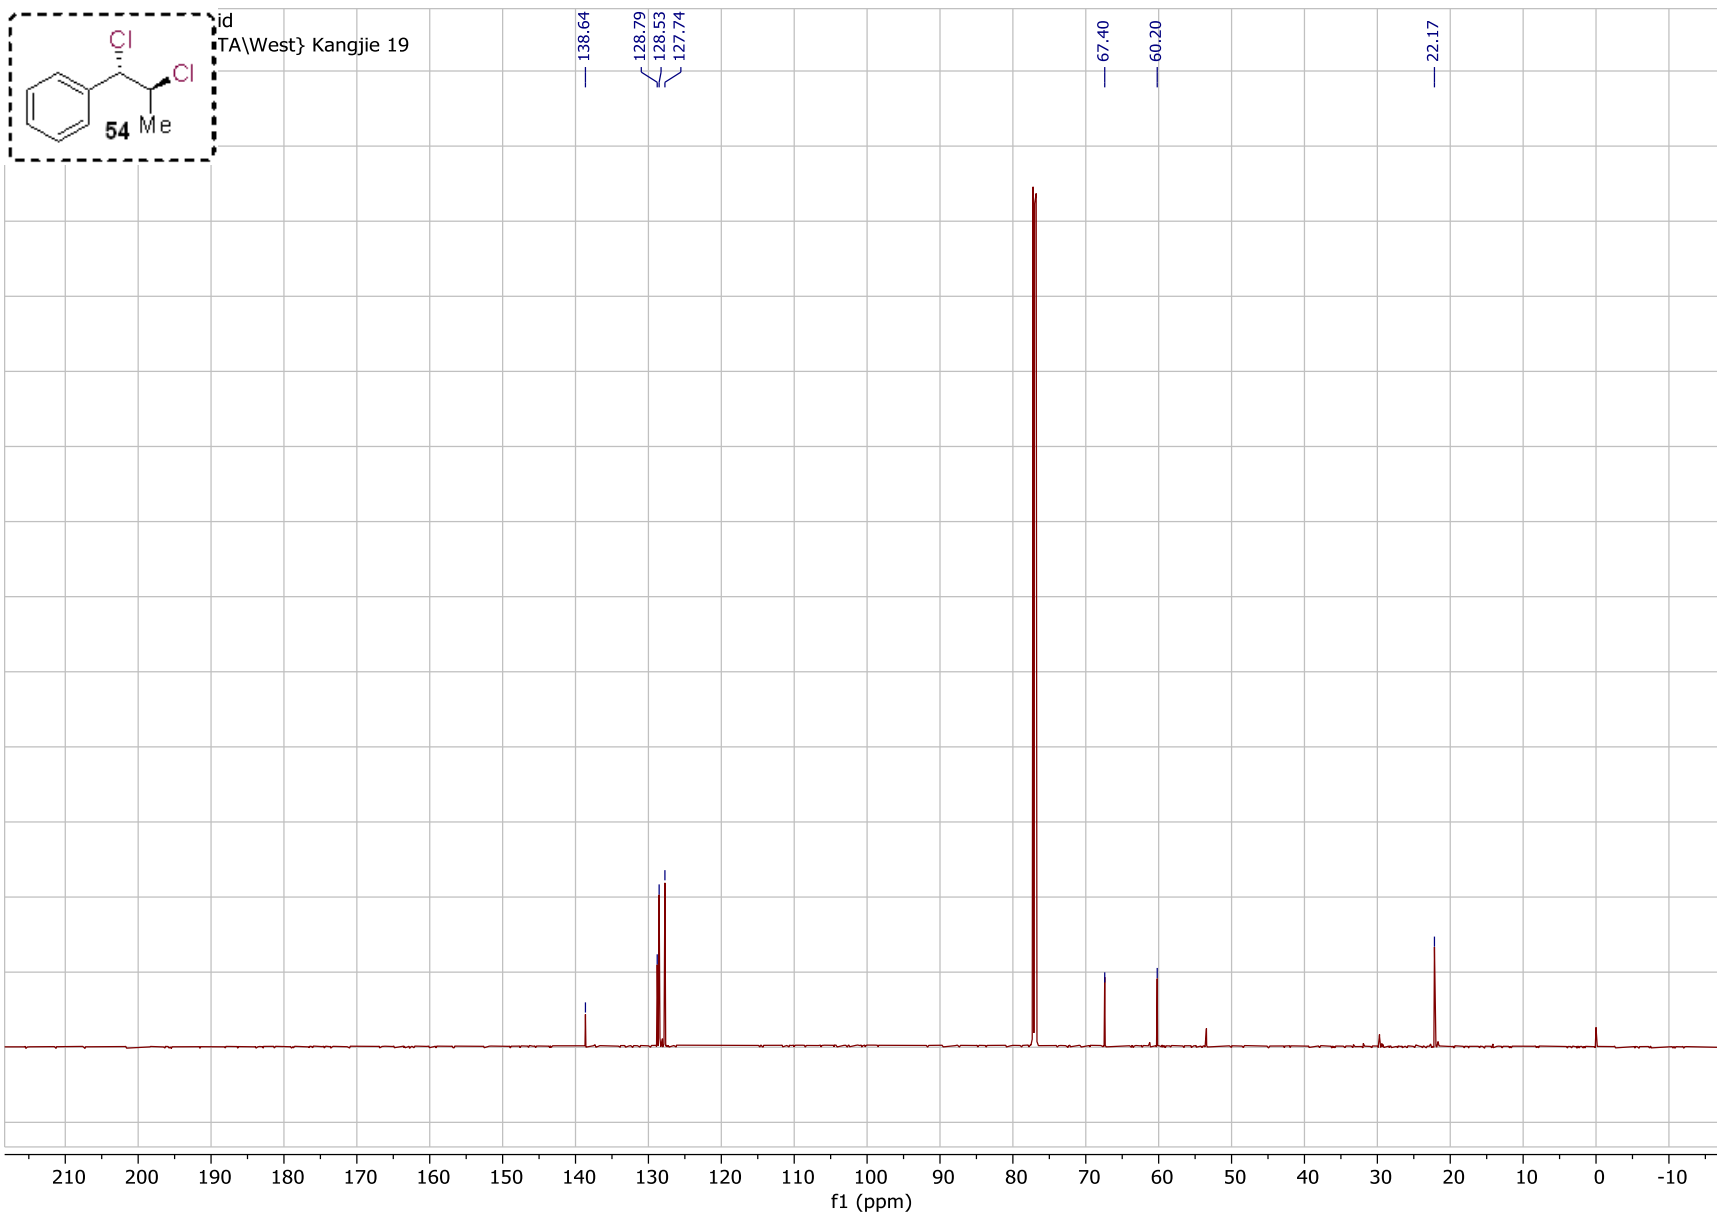

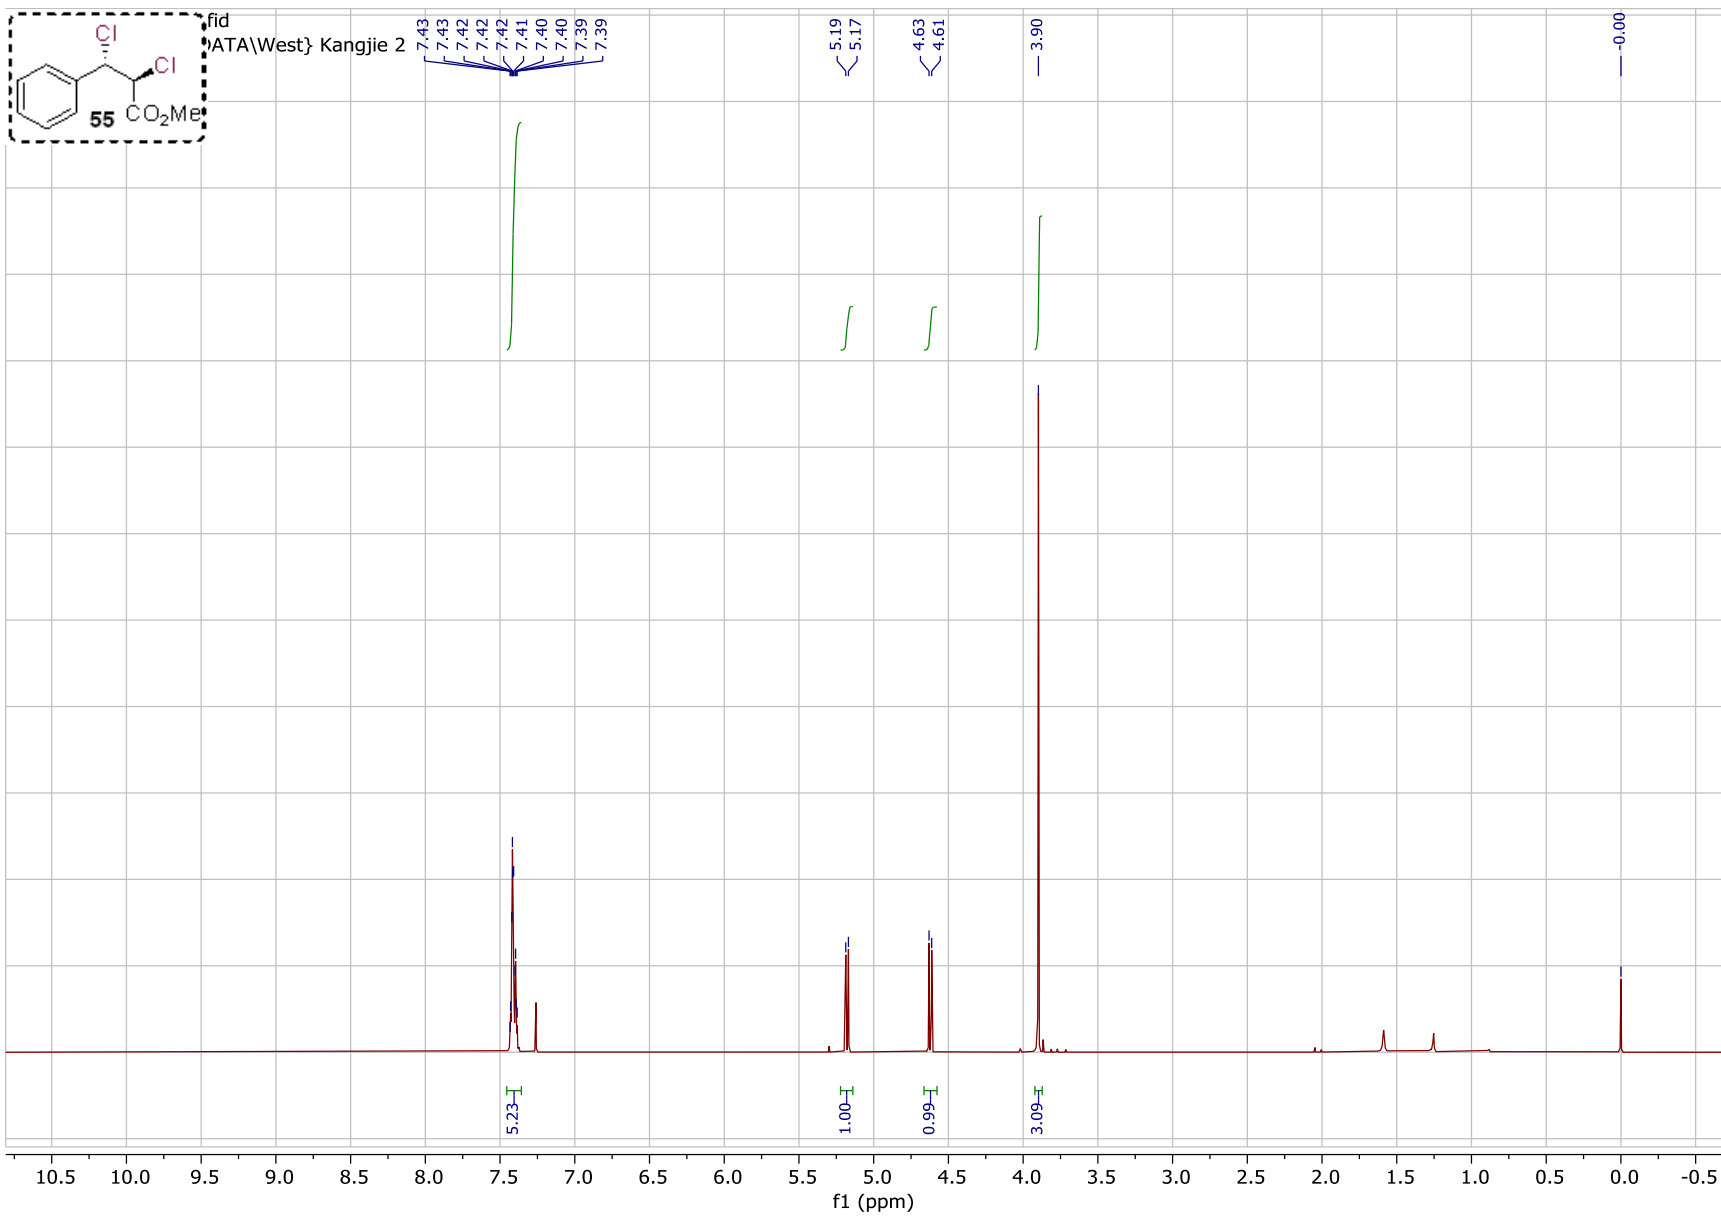

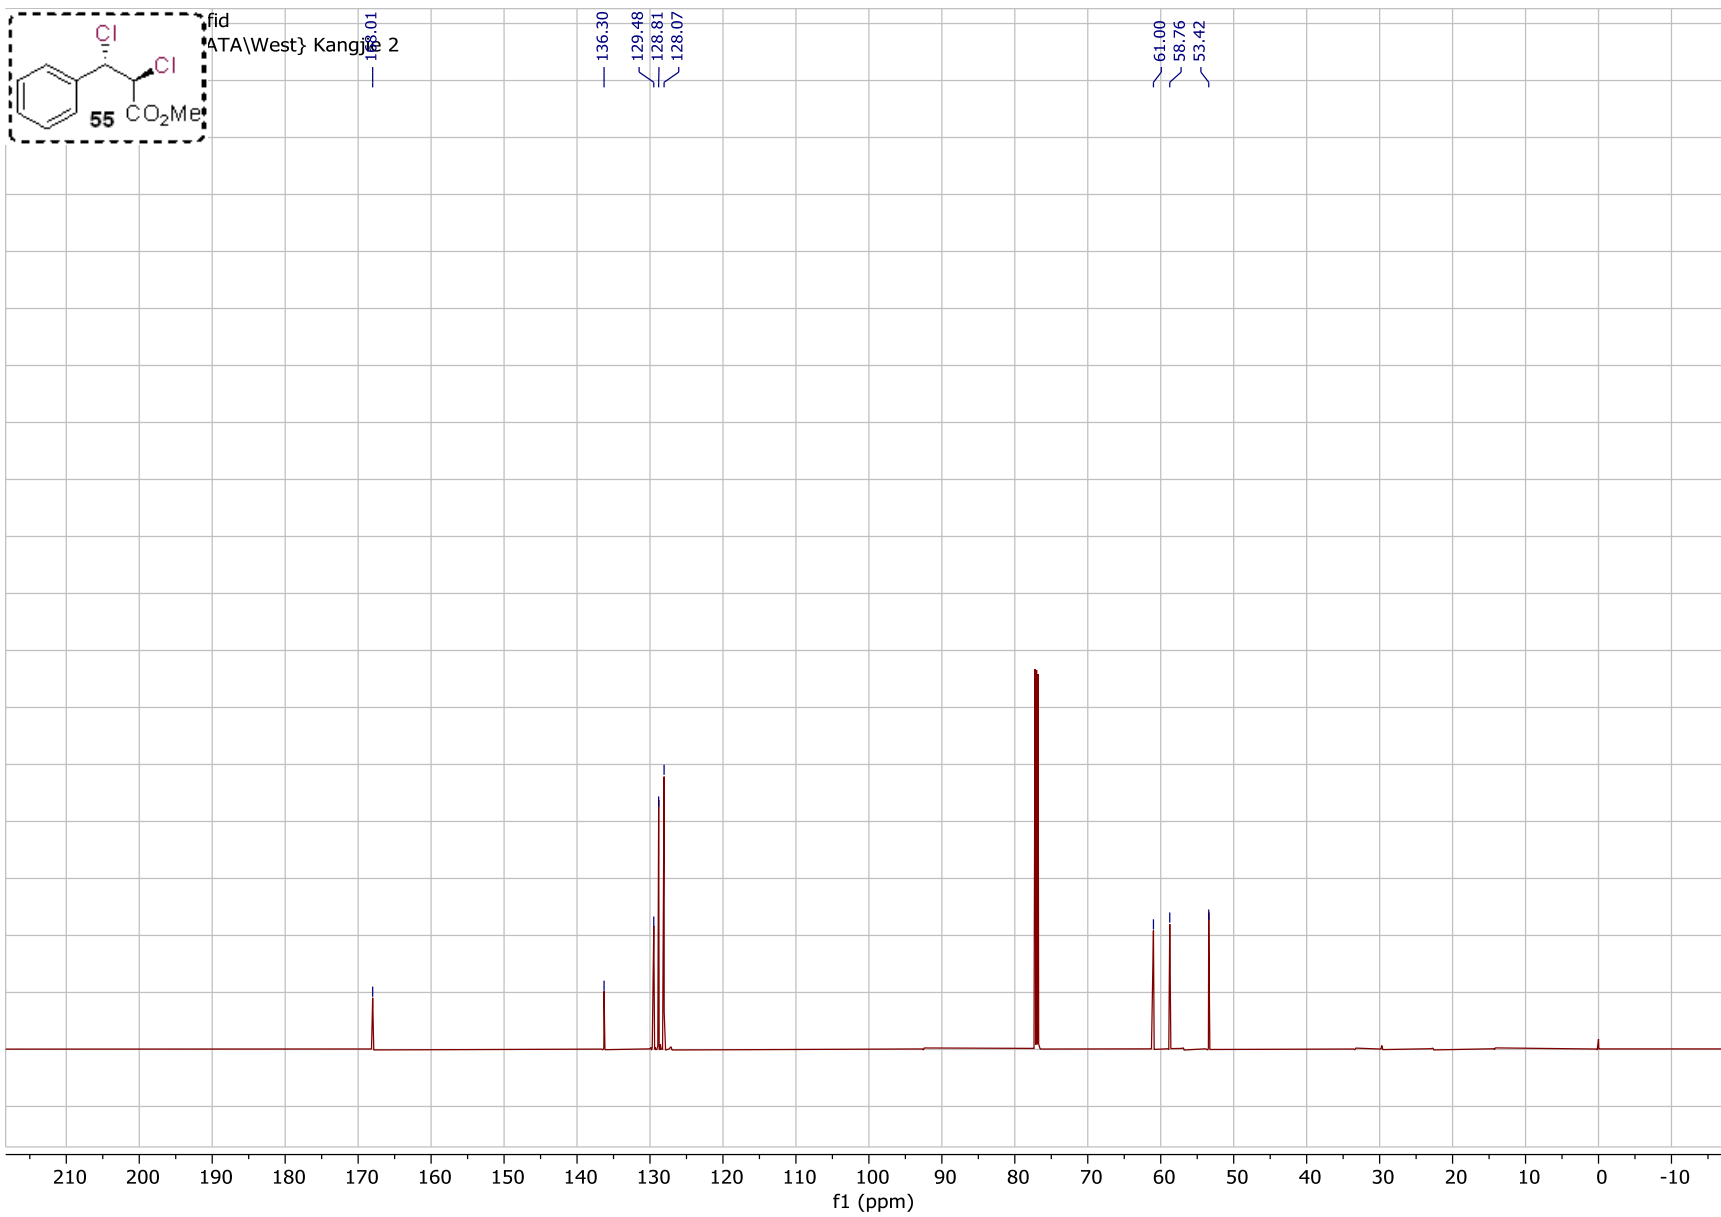

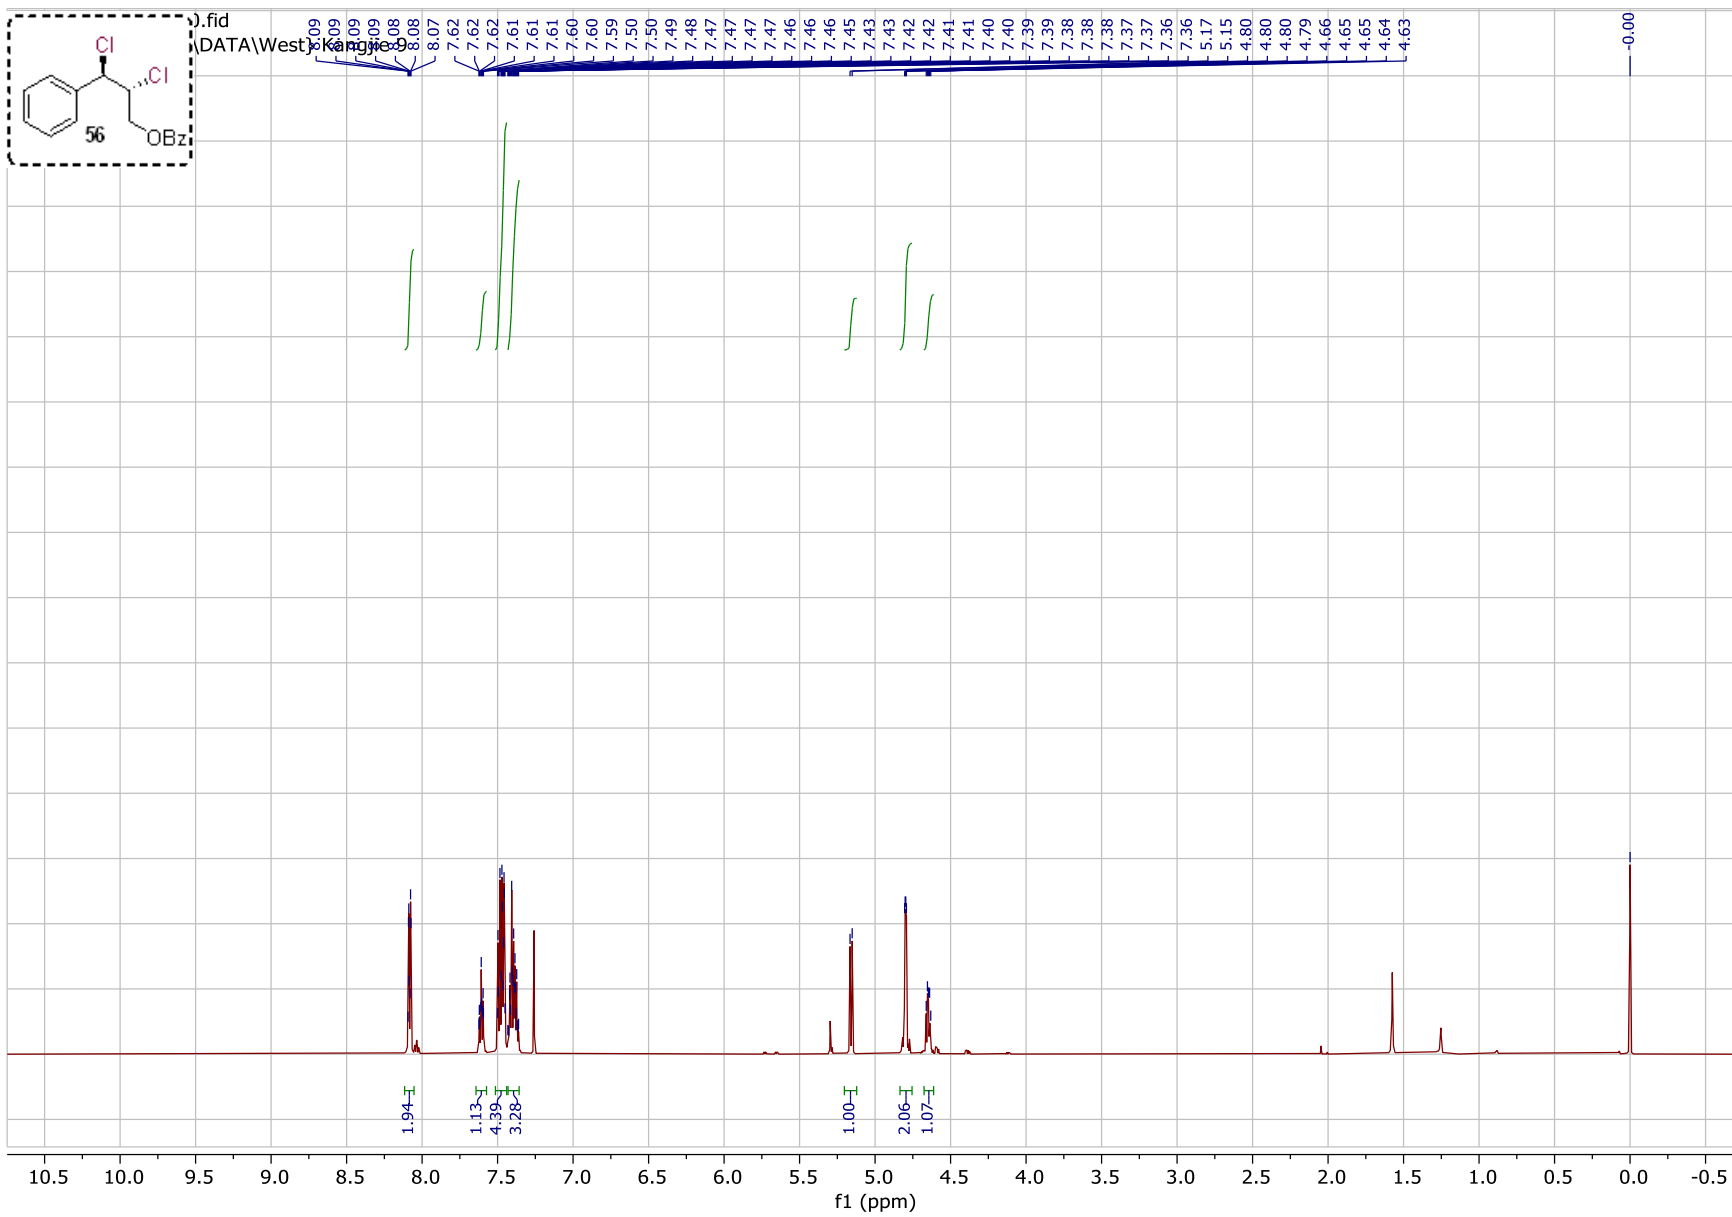

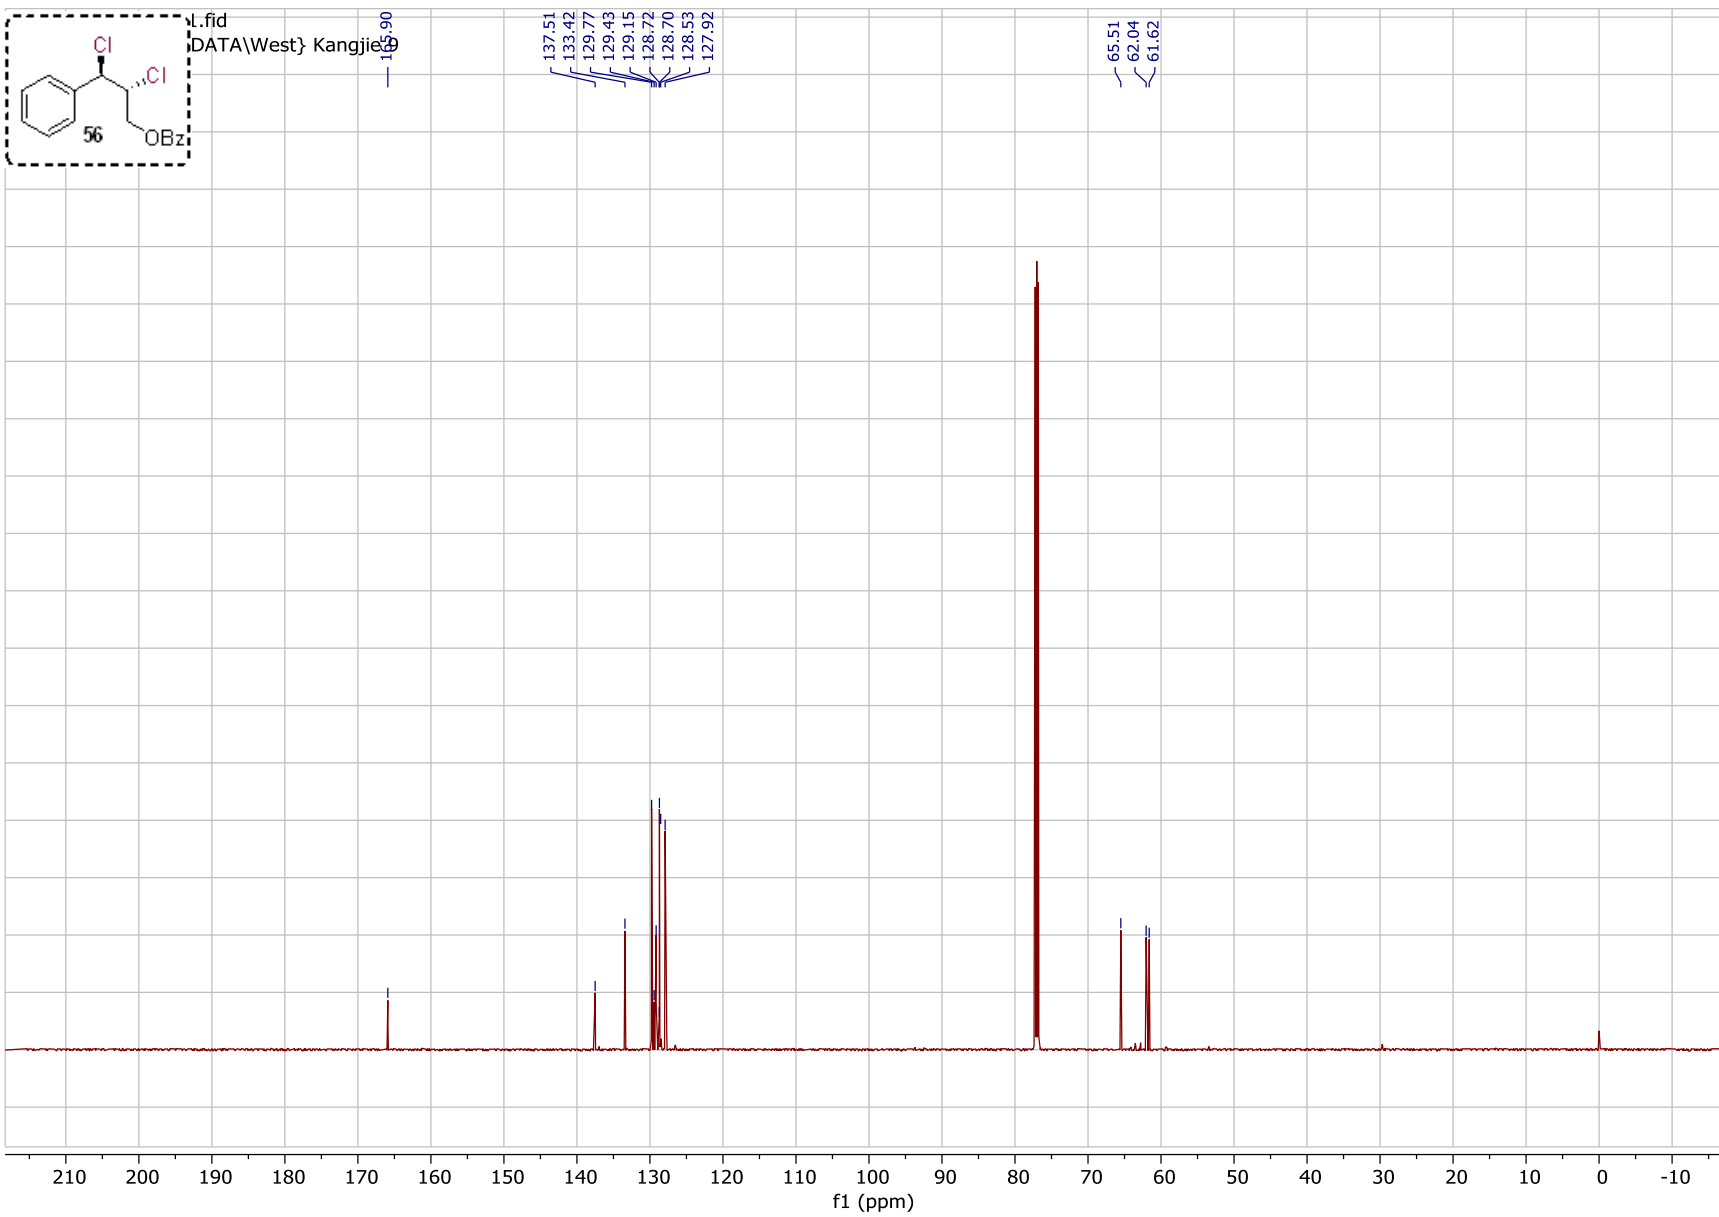

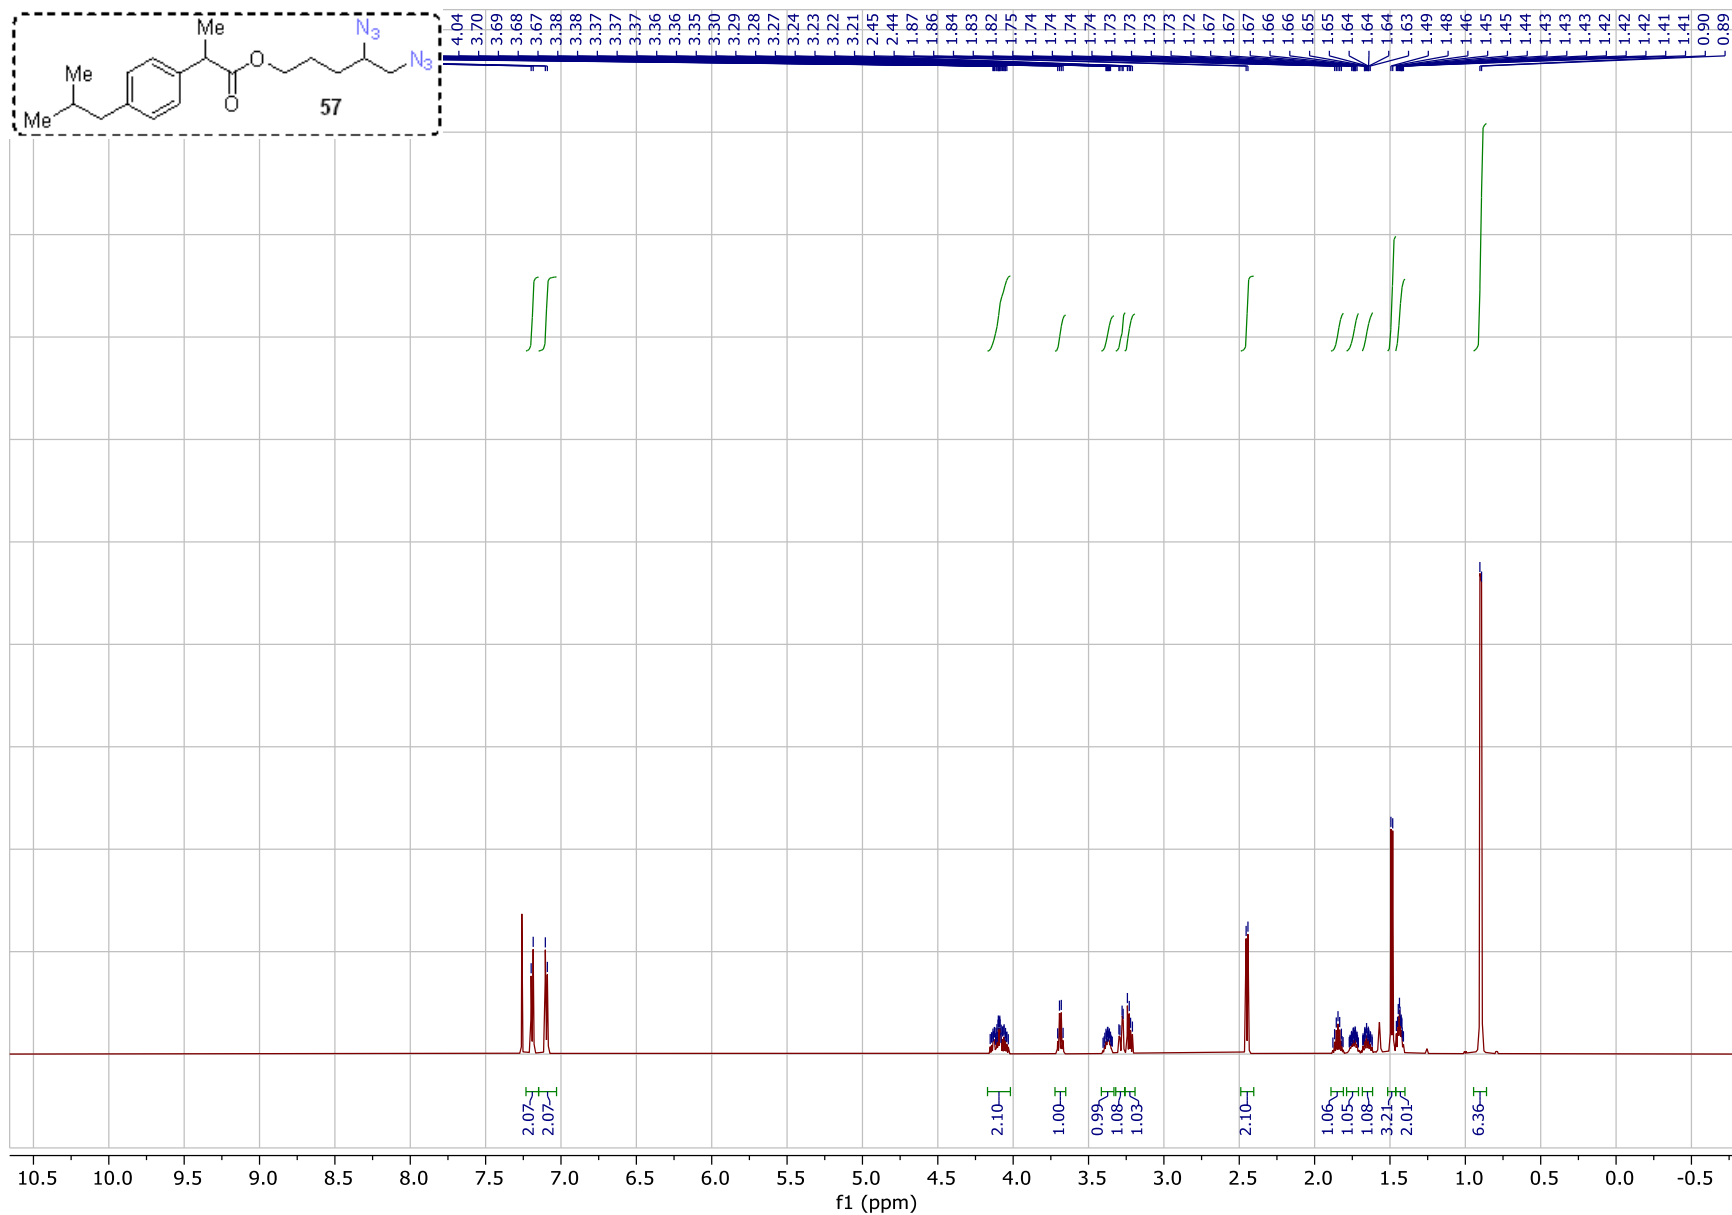

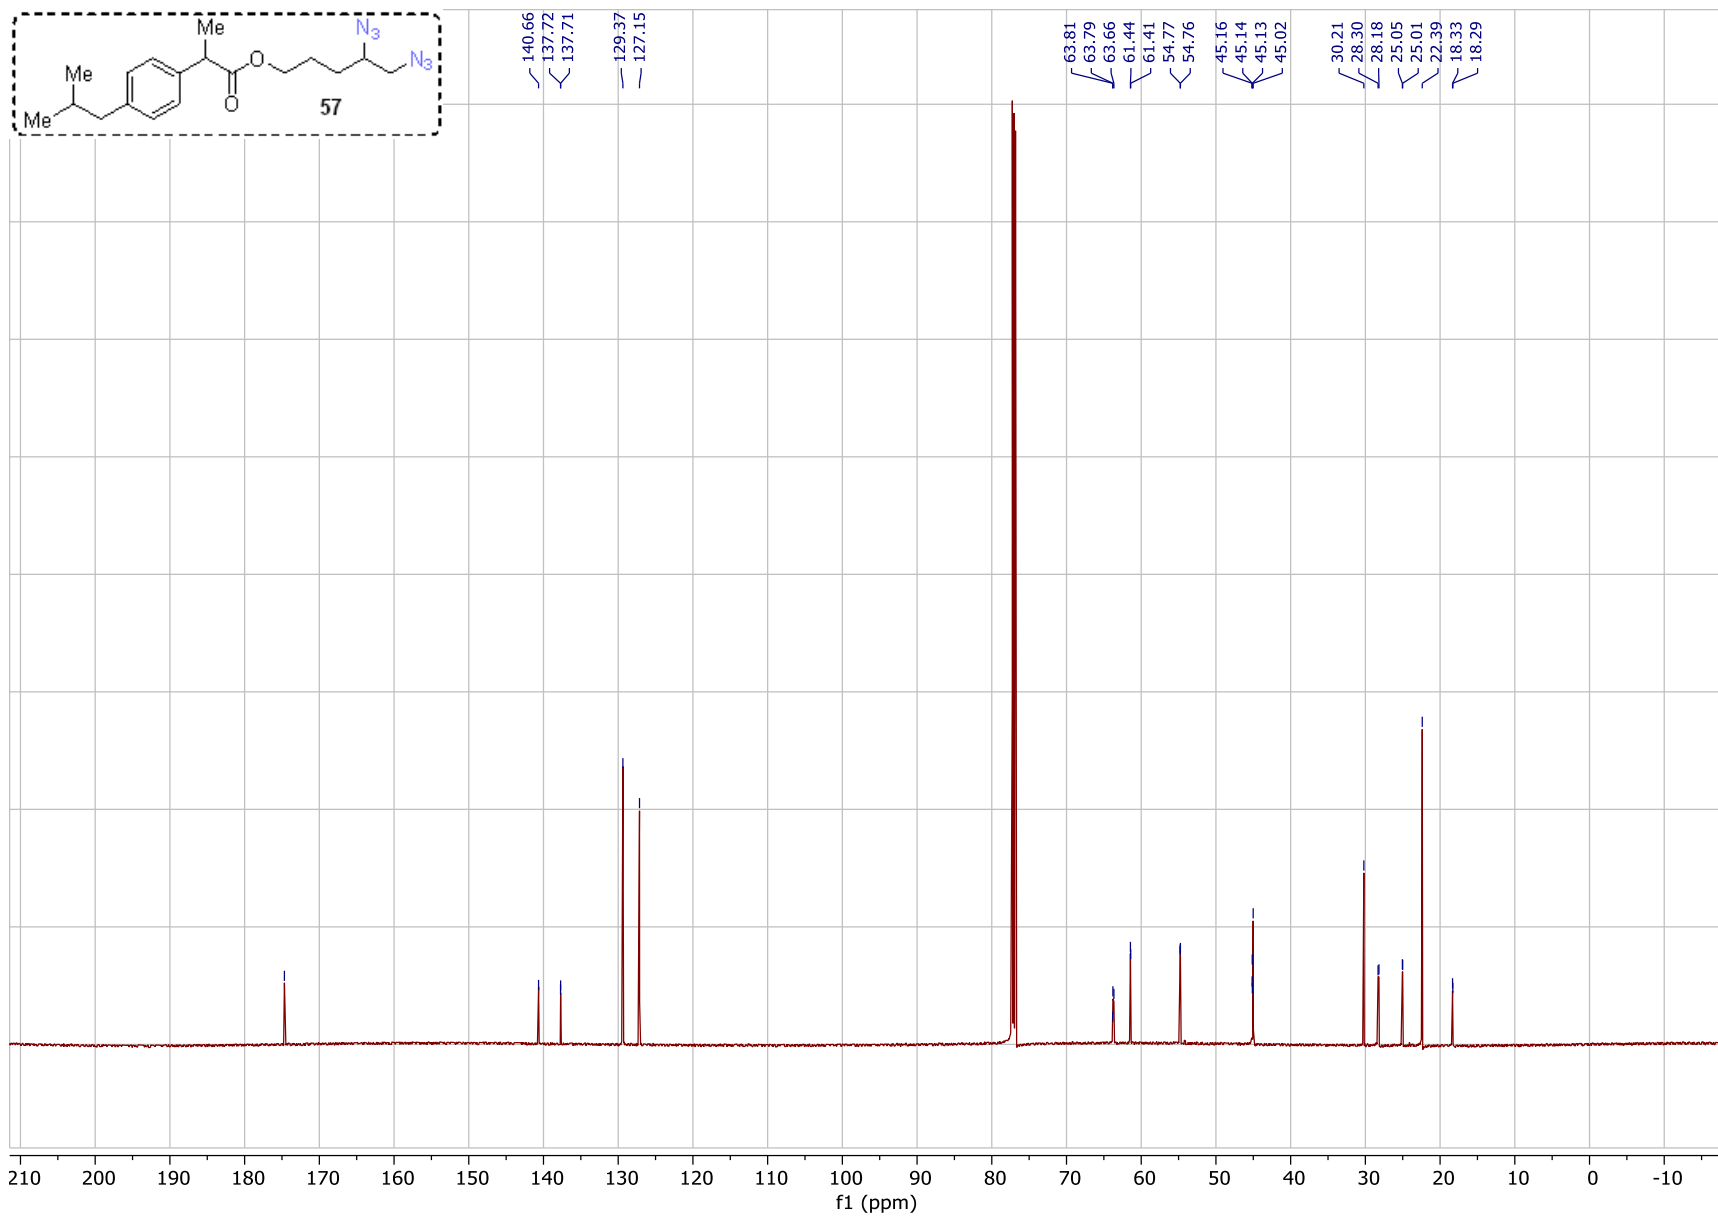

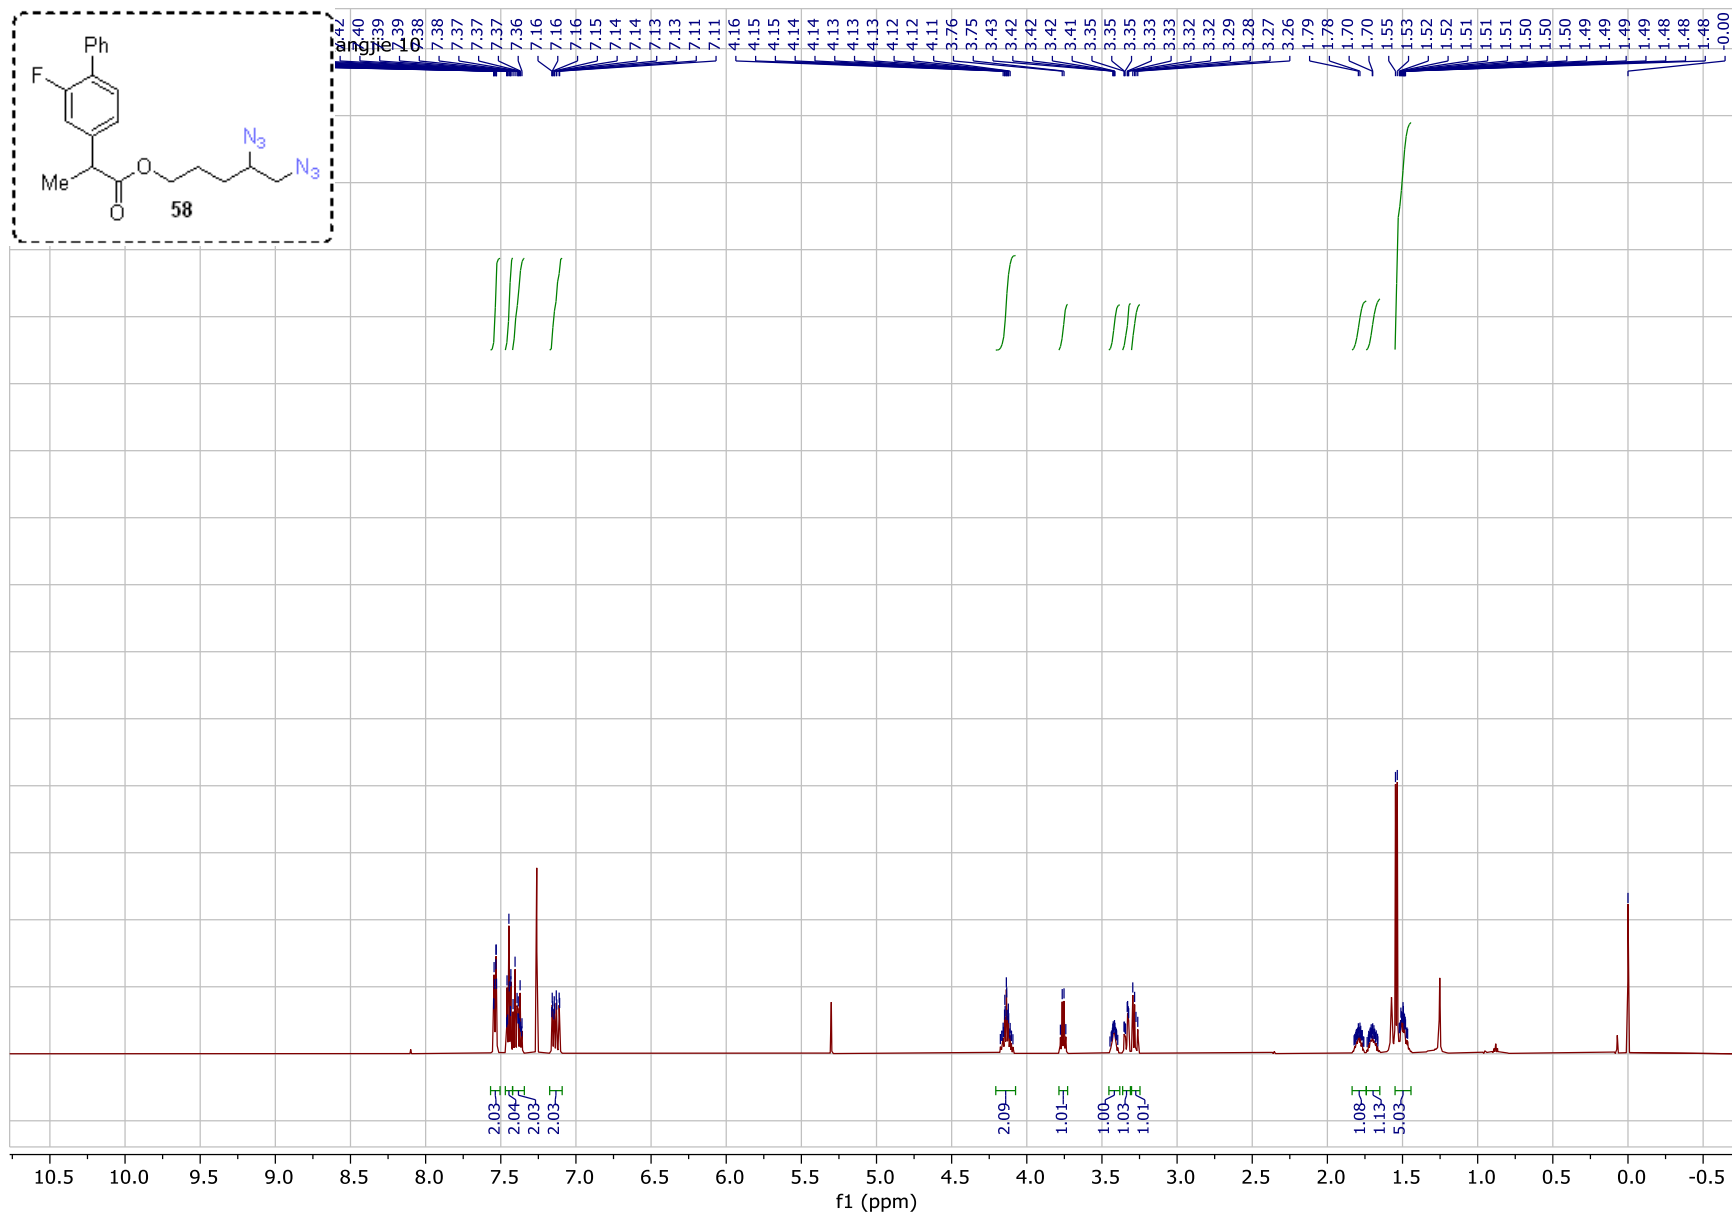



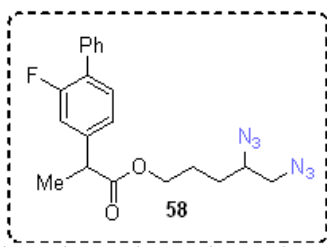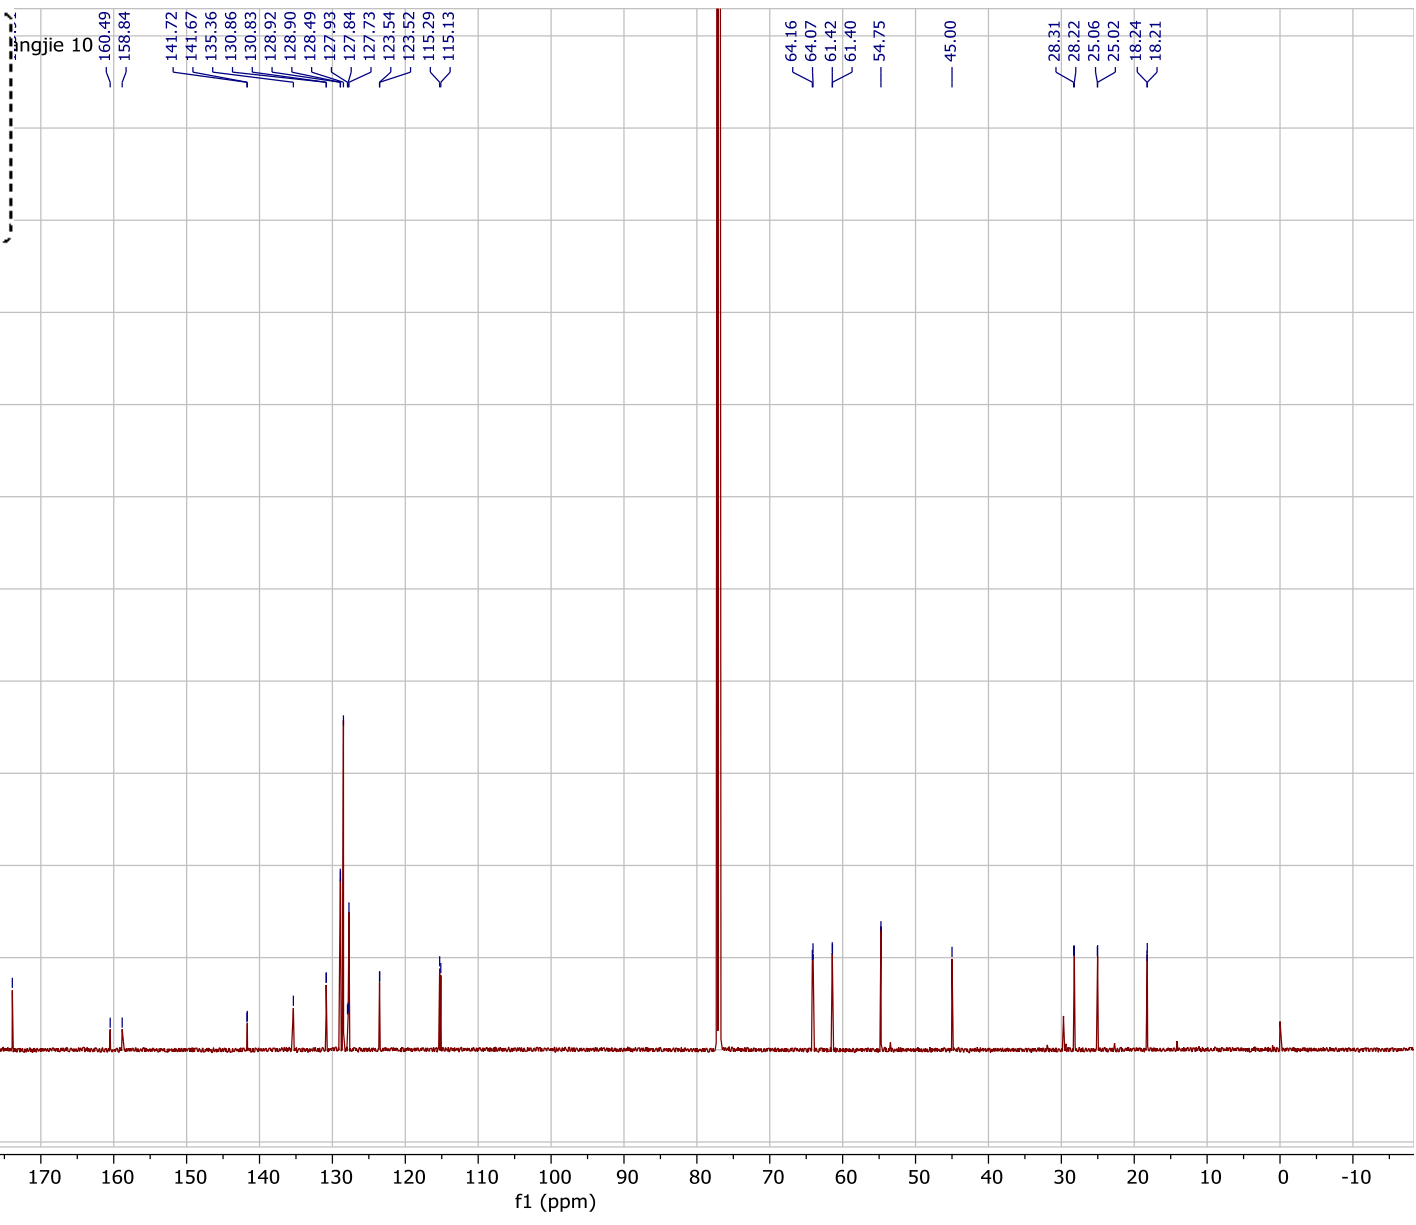

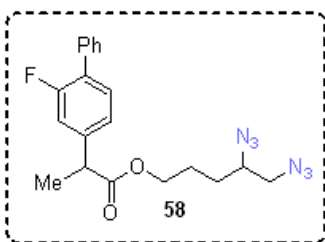

ATA\West\ Kangjie 10

-117.50  
-117.52  
-117.54

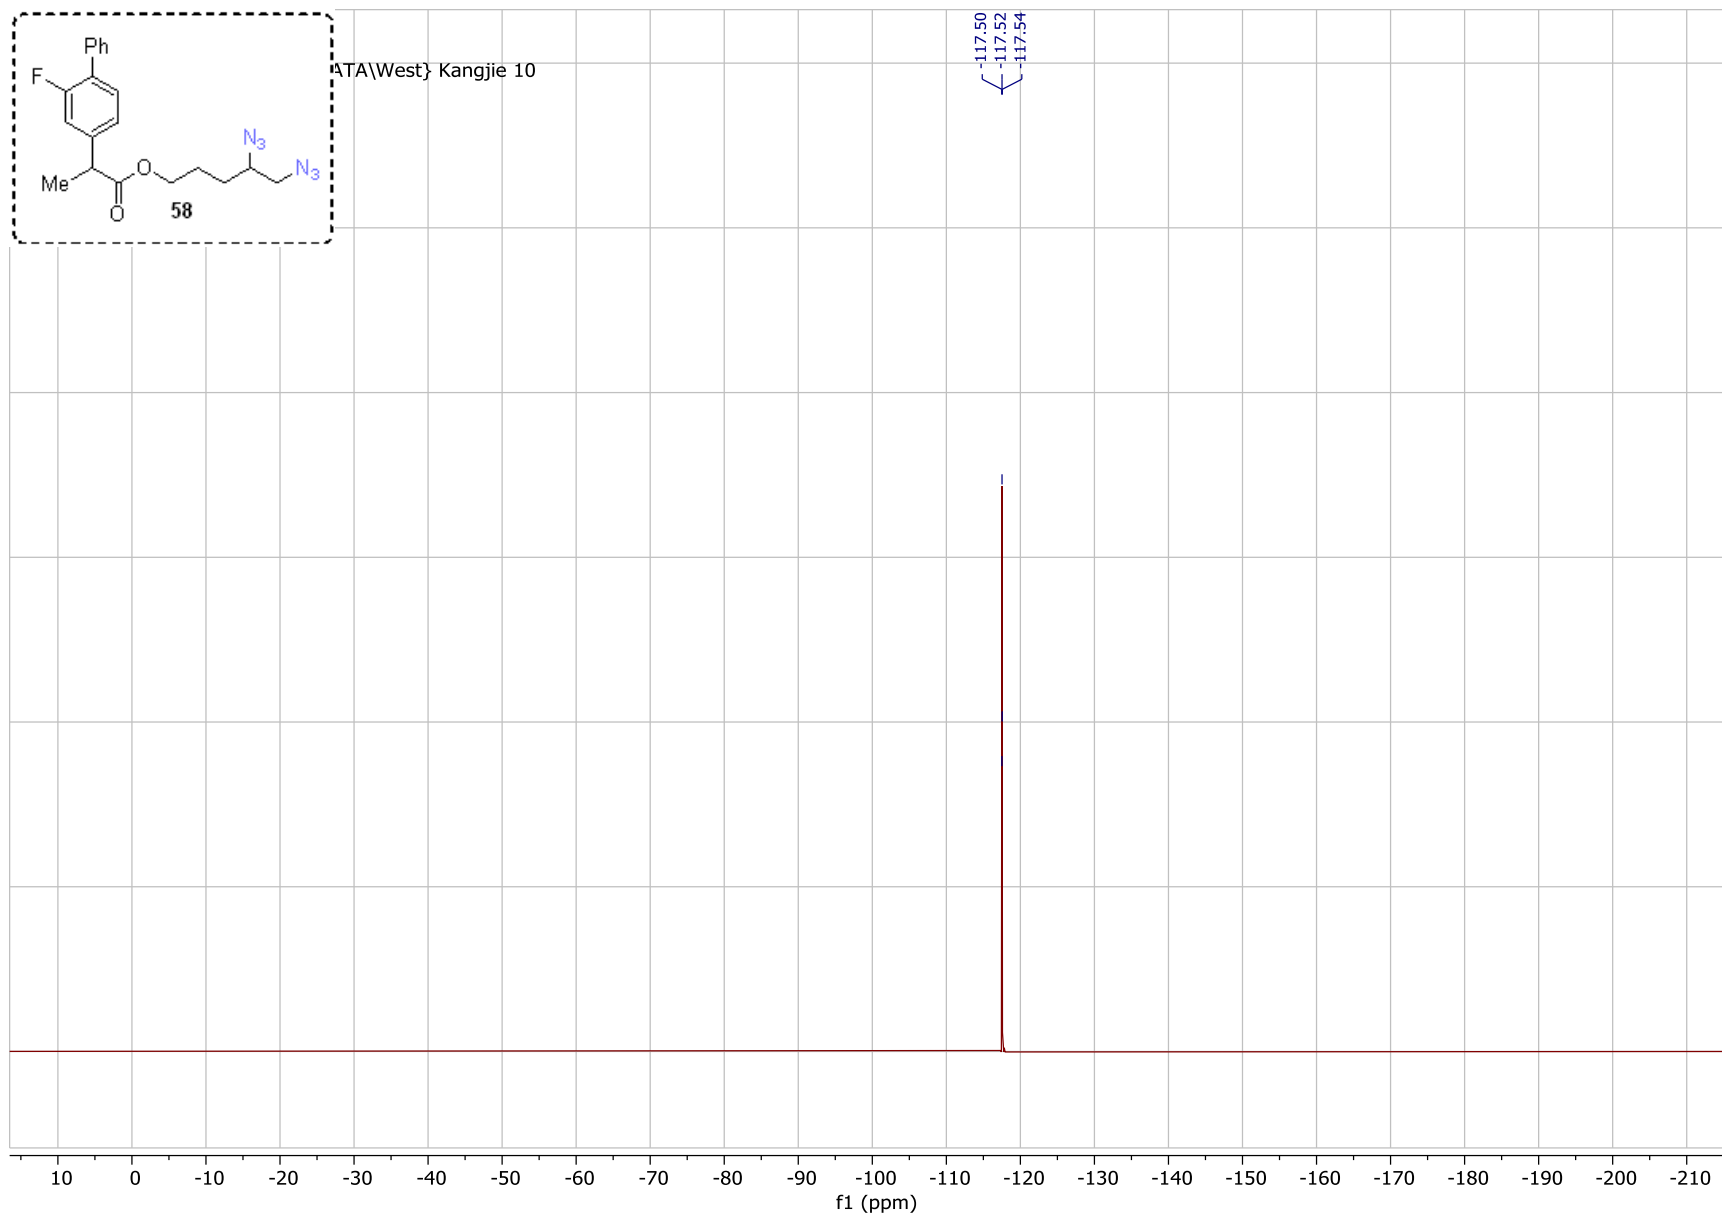

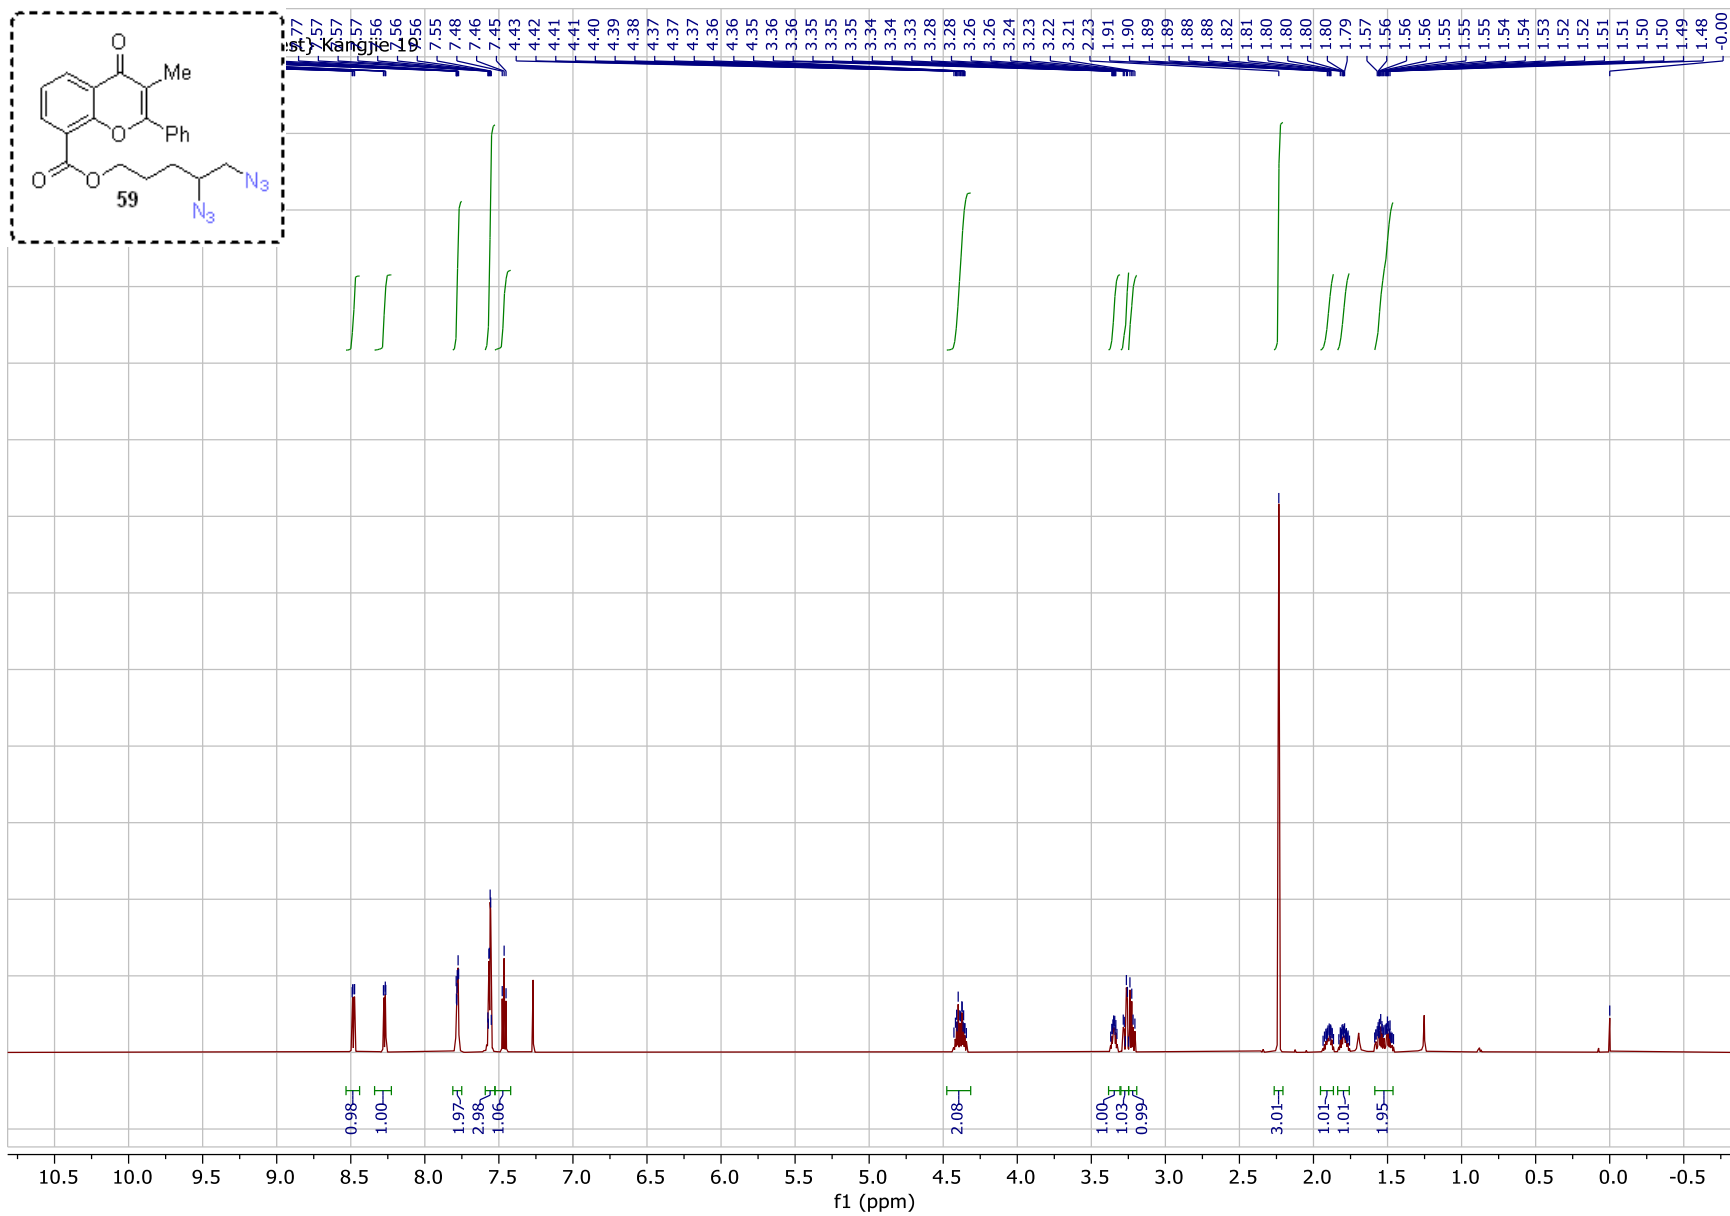

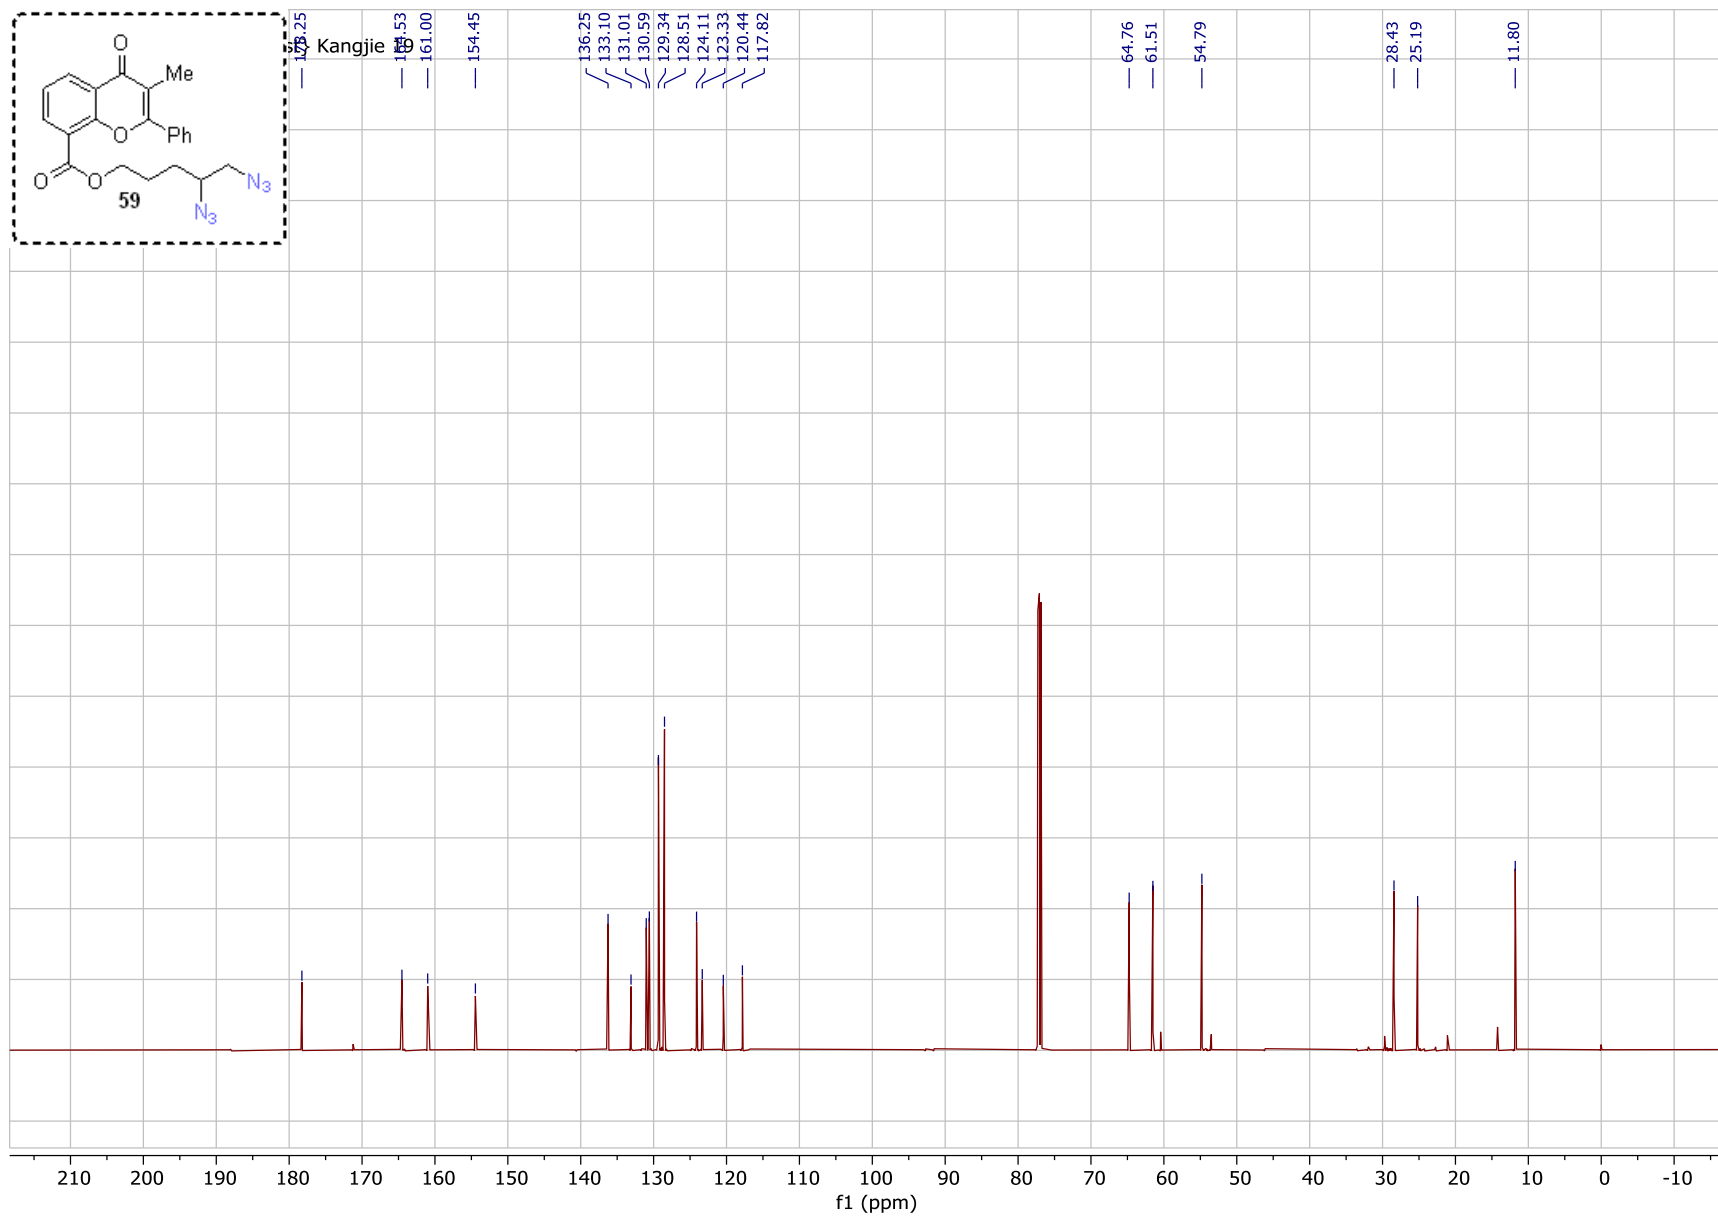

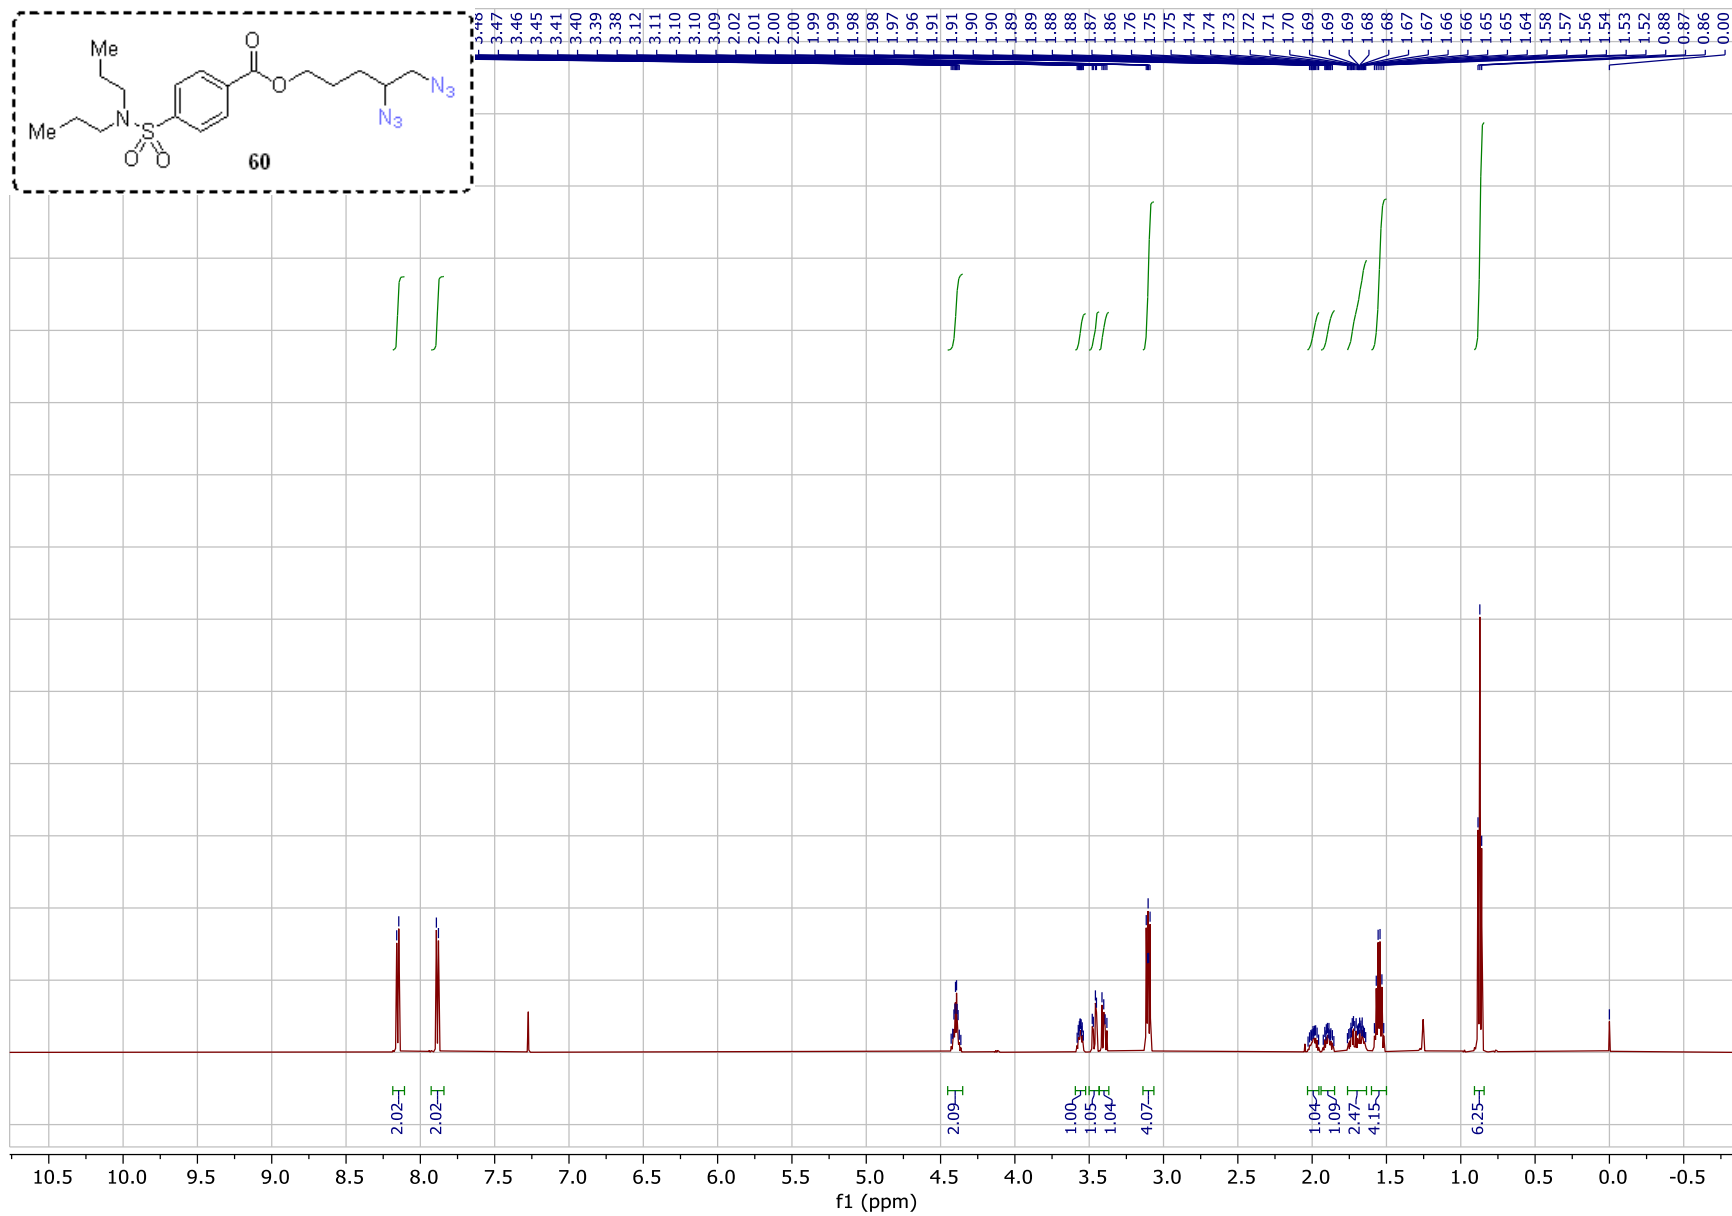

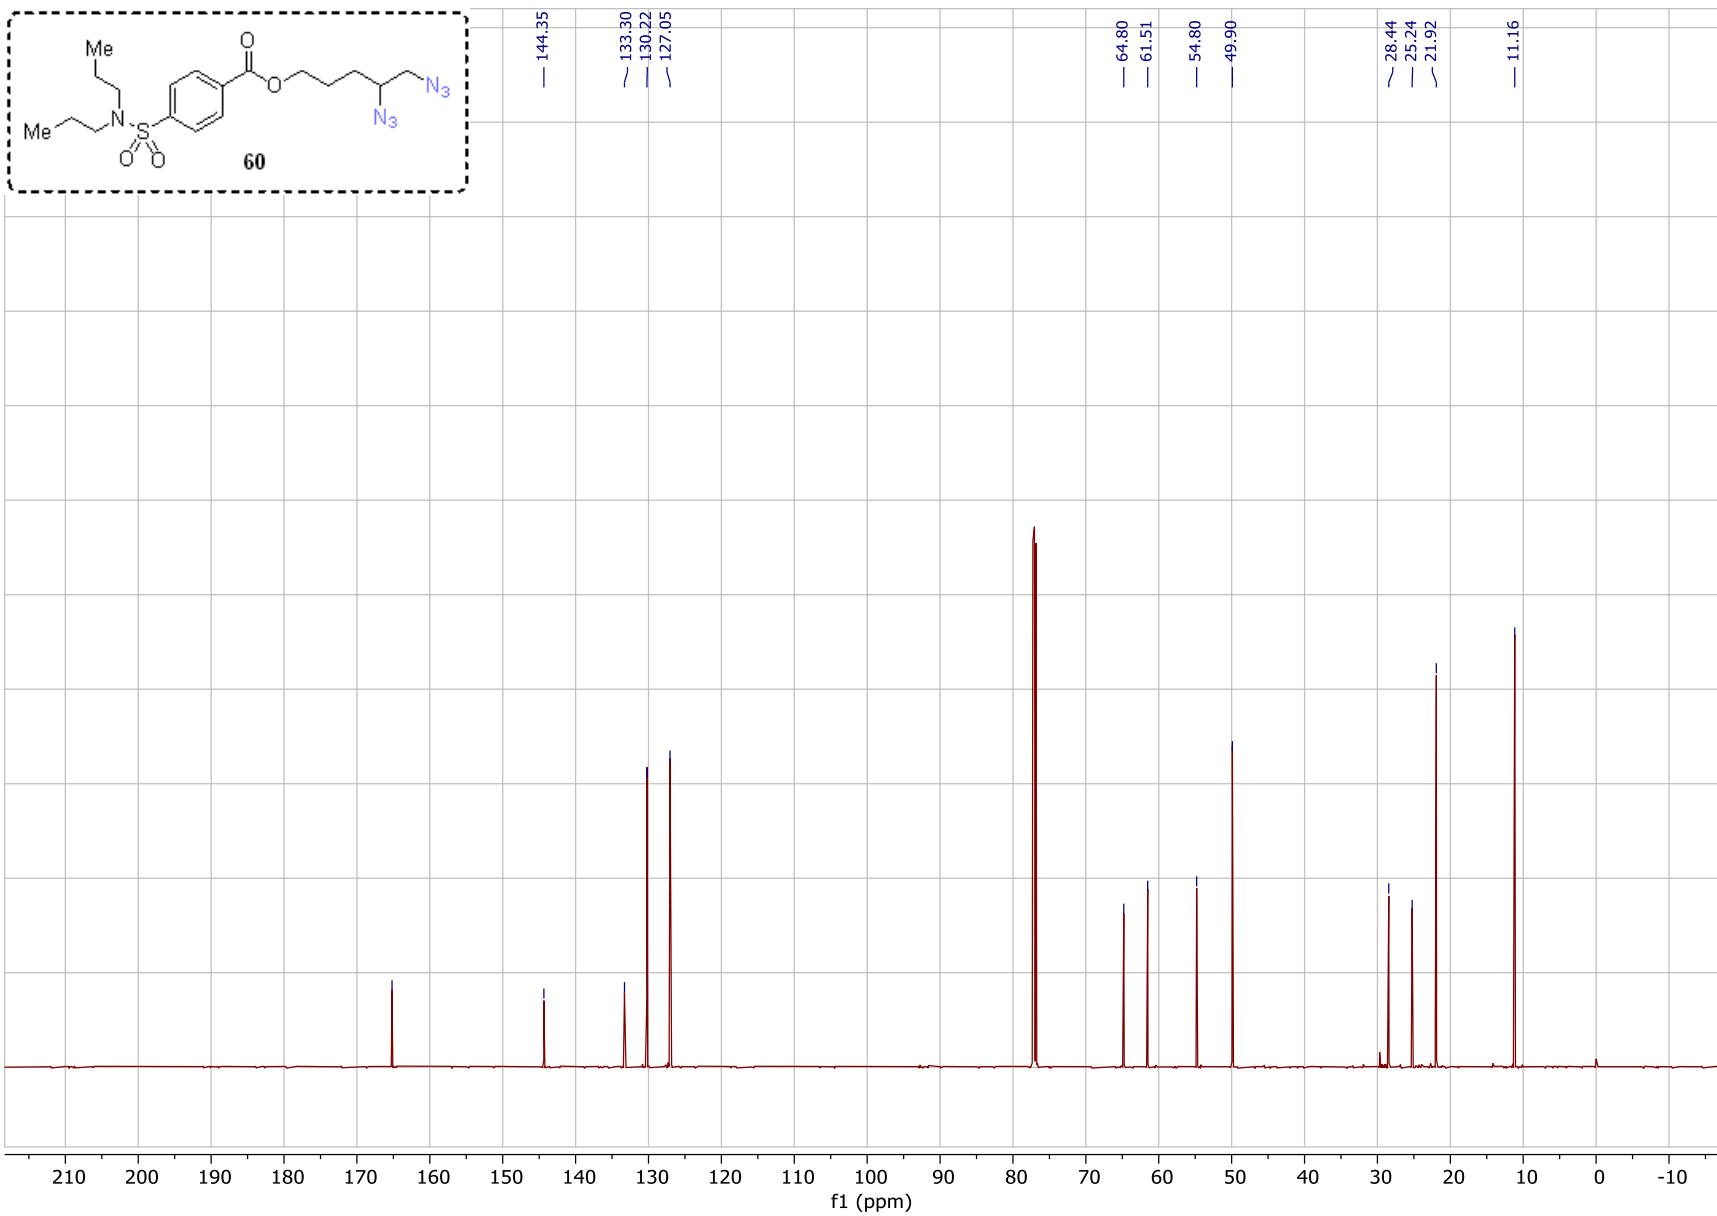

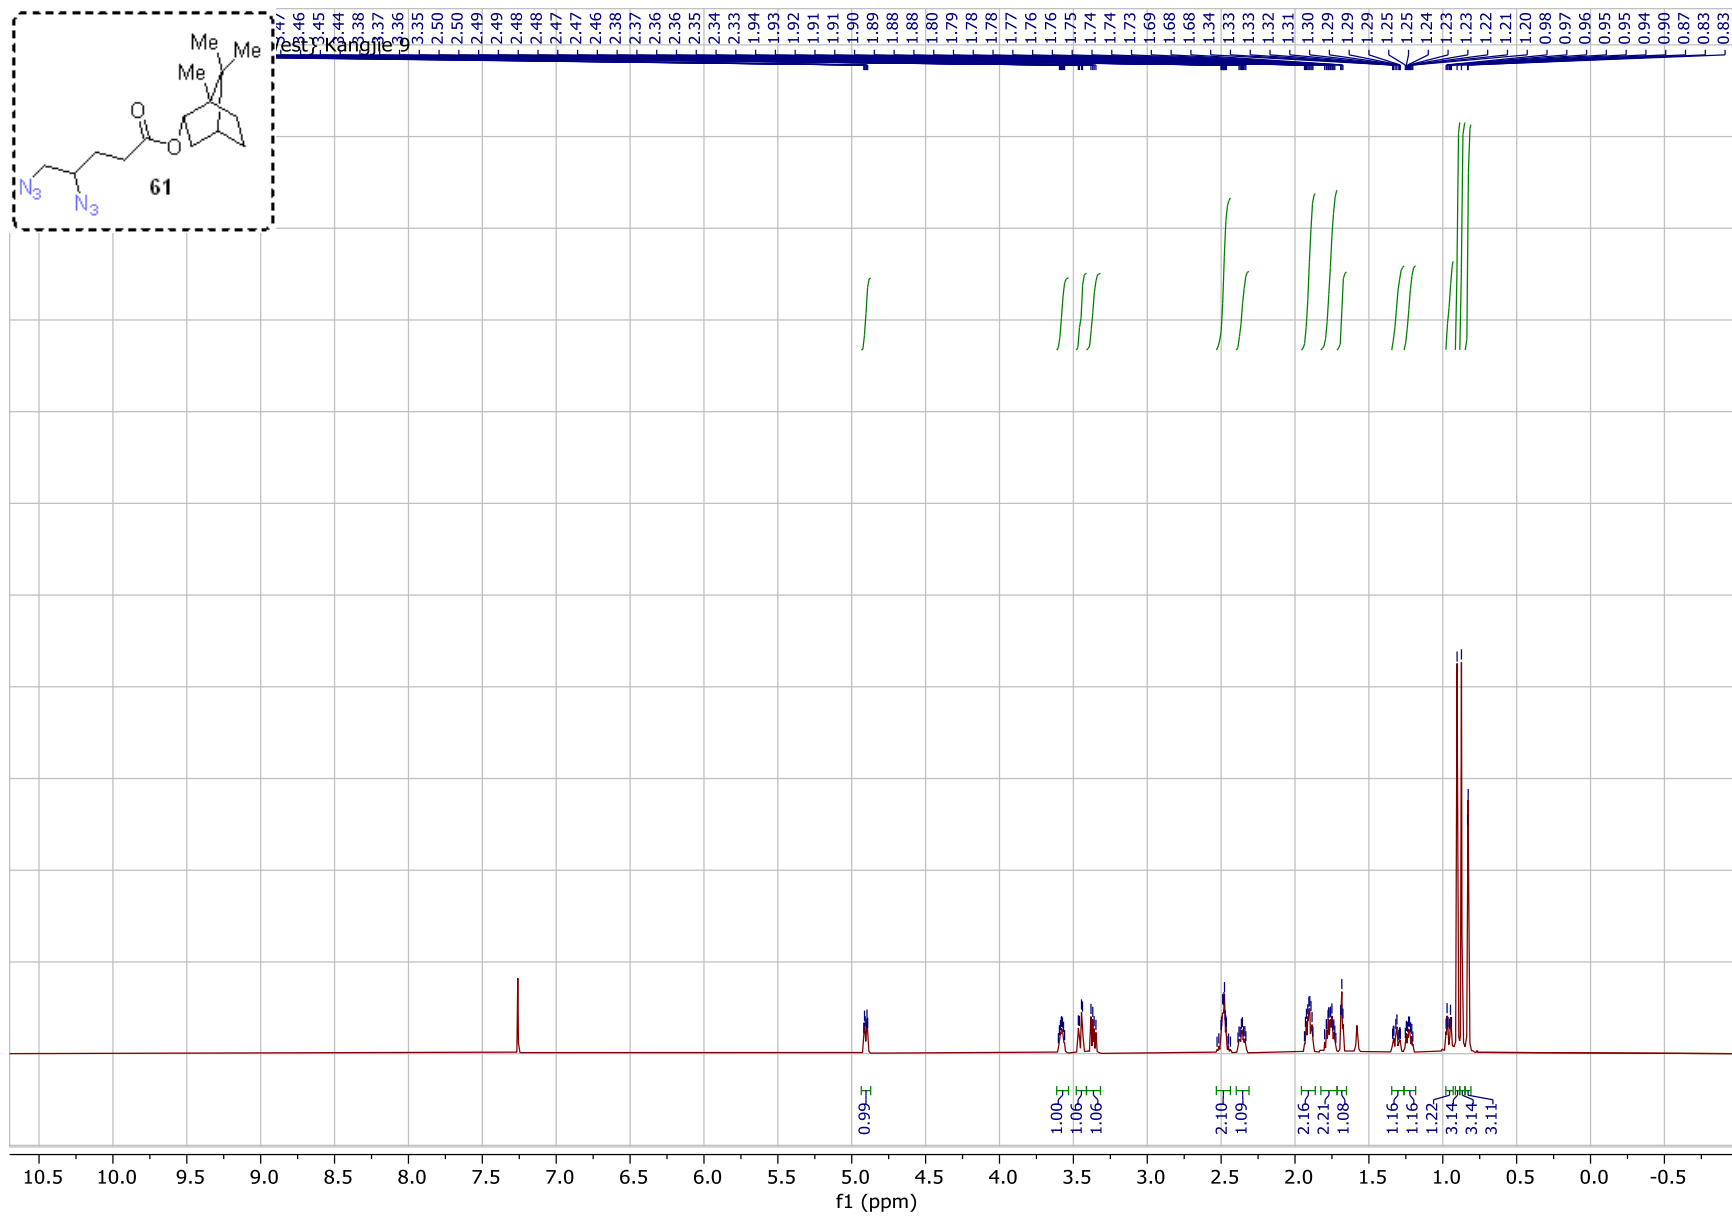

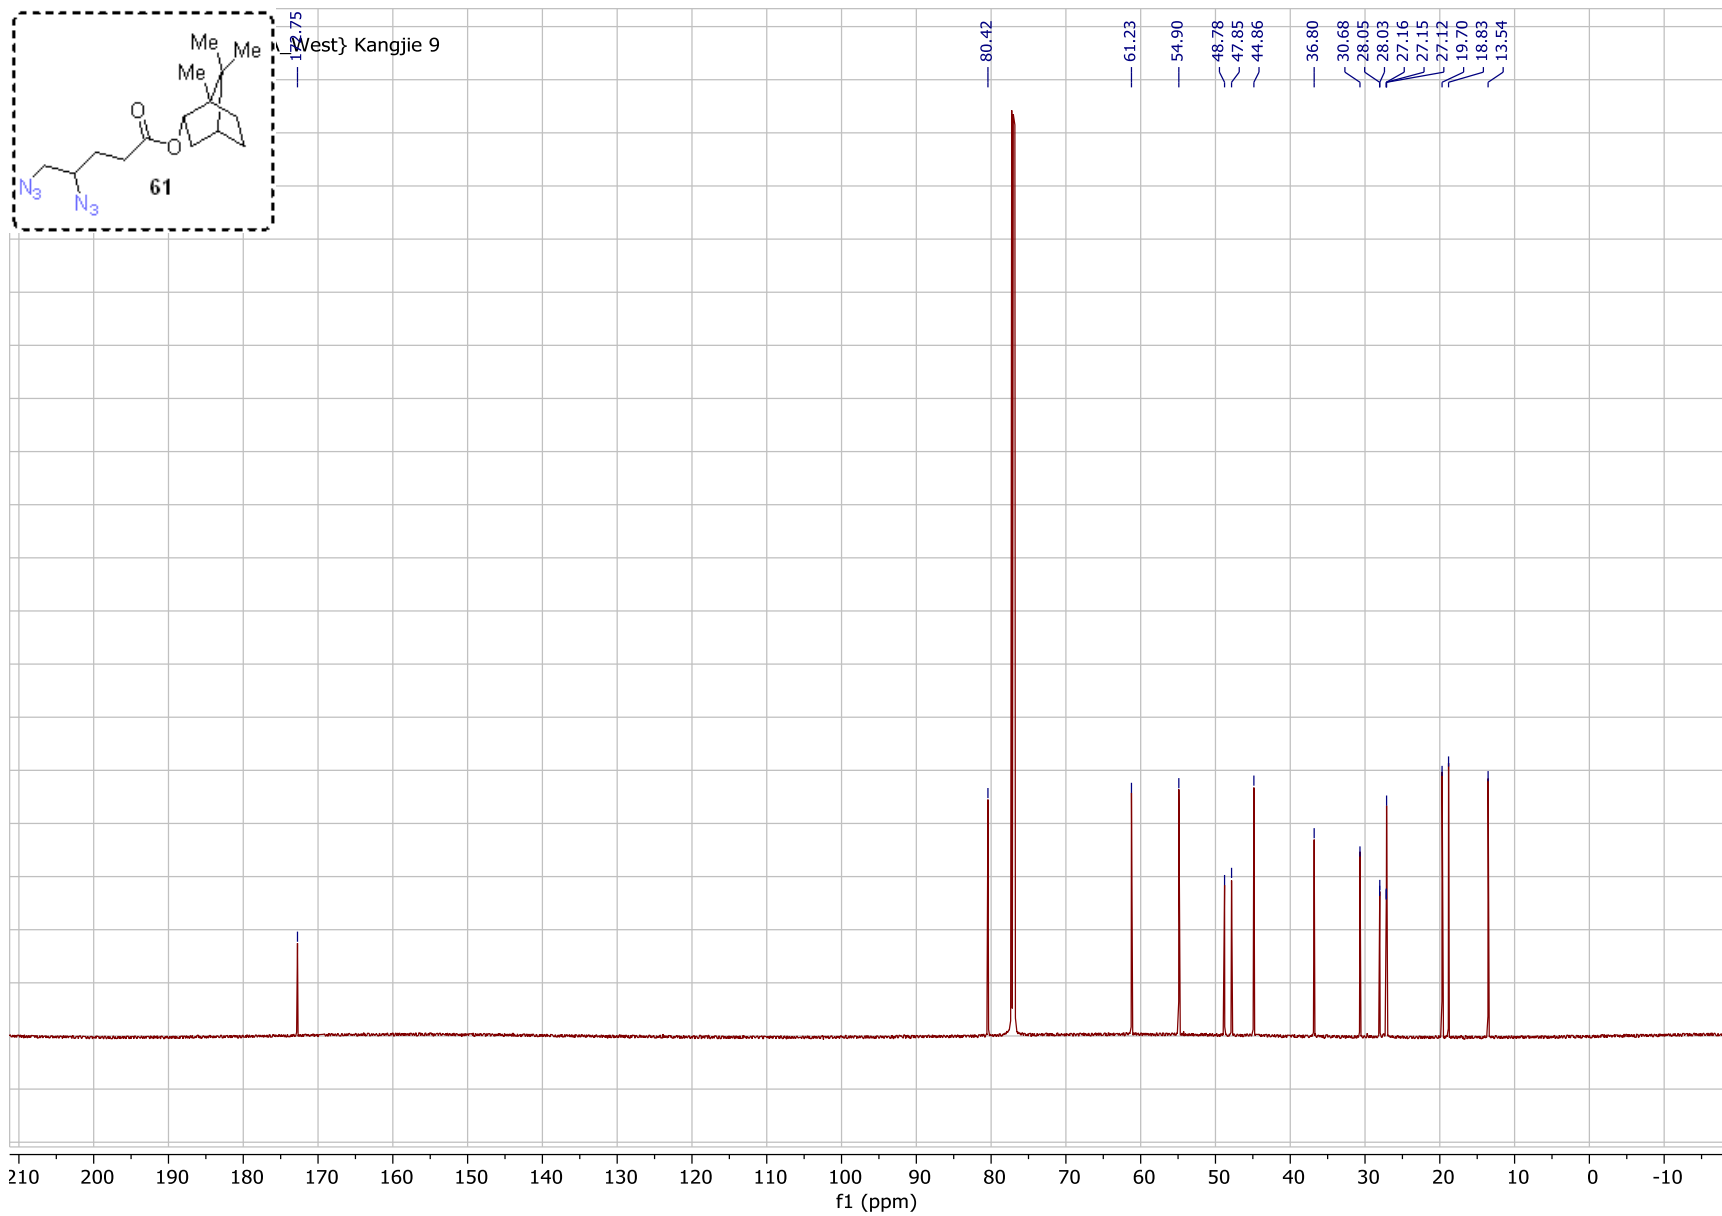



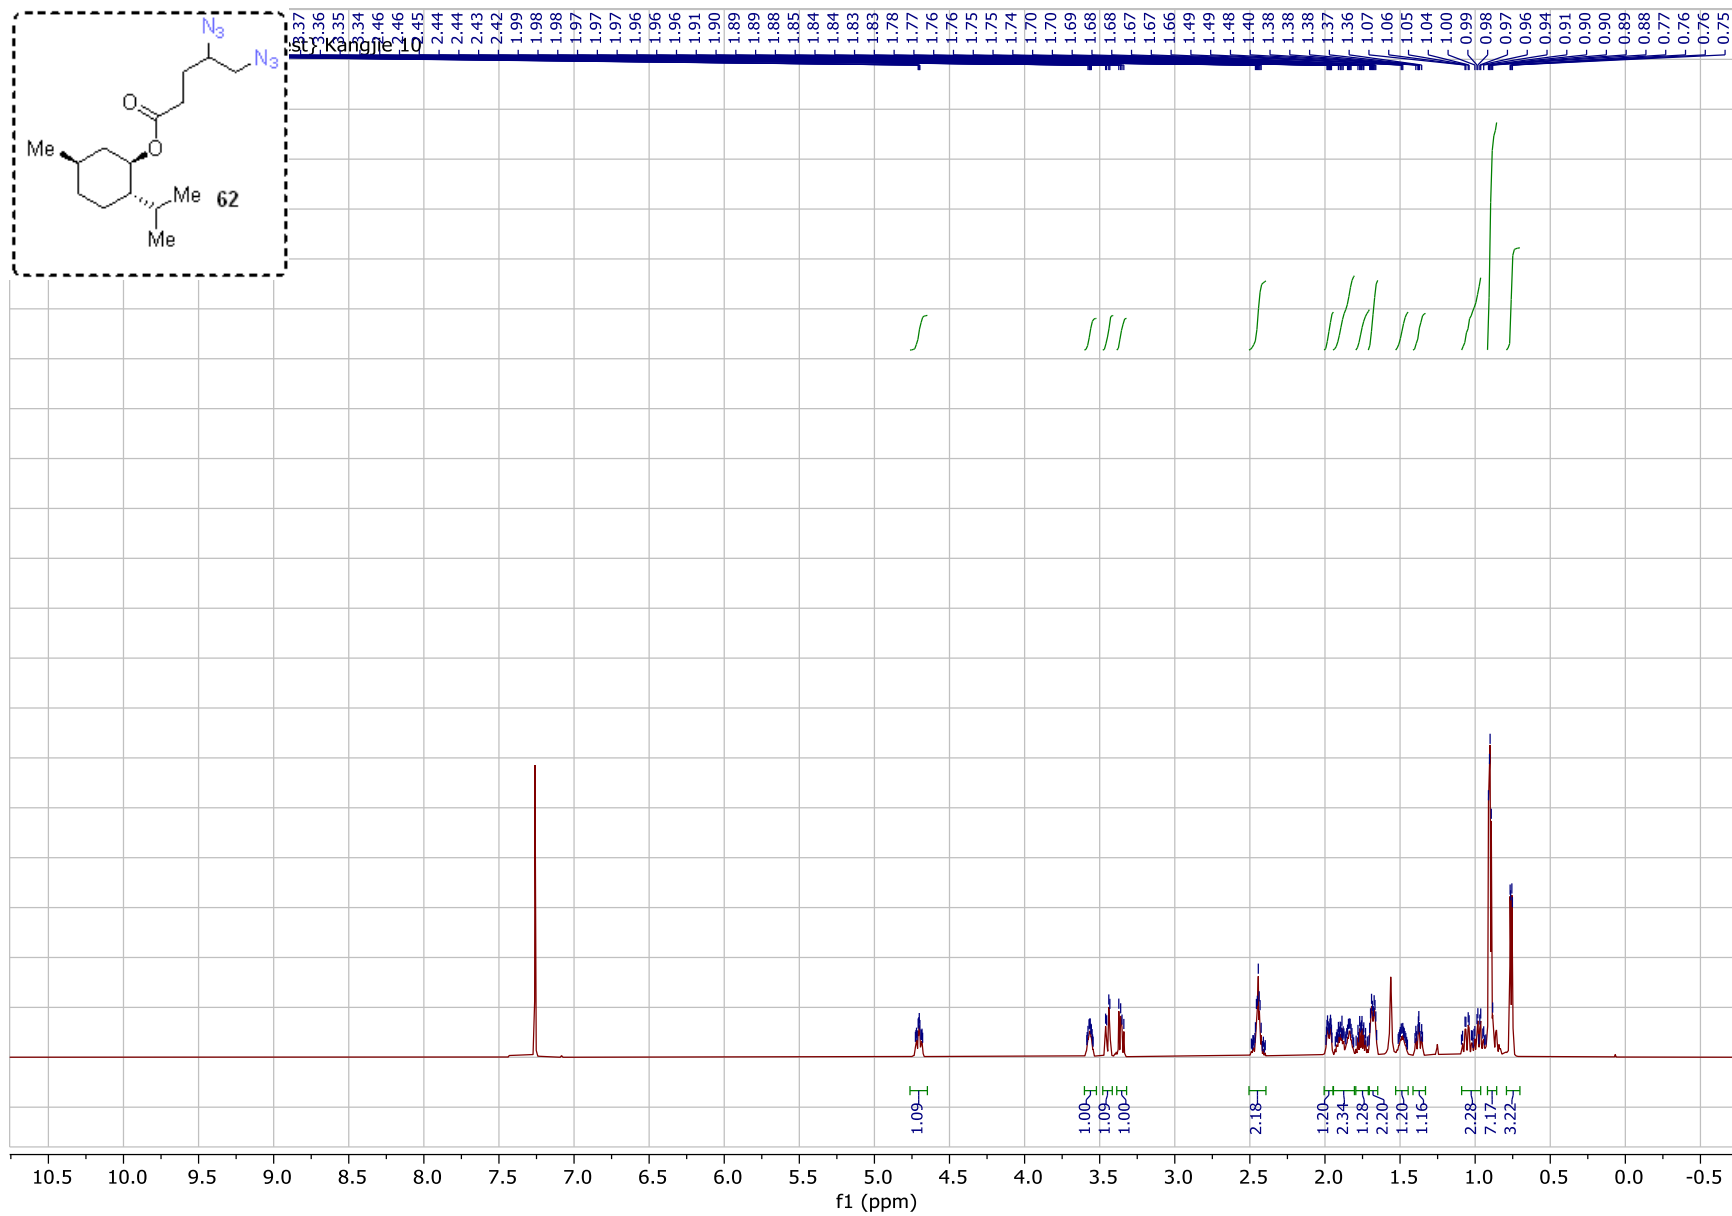

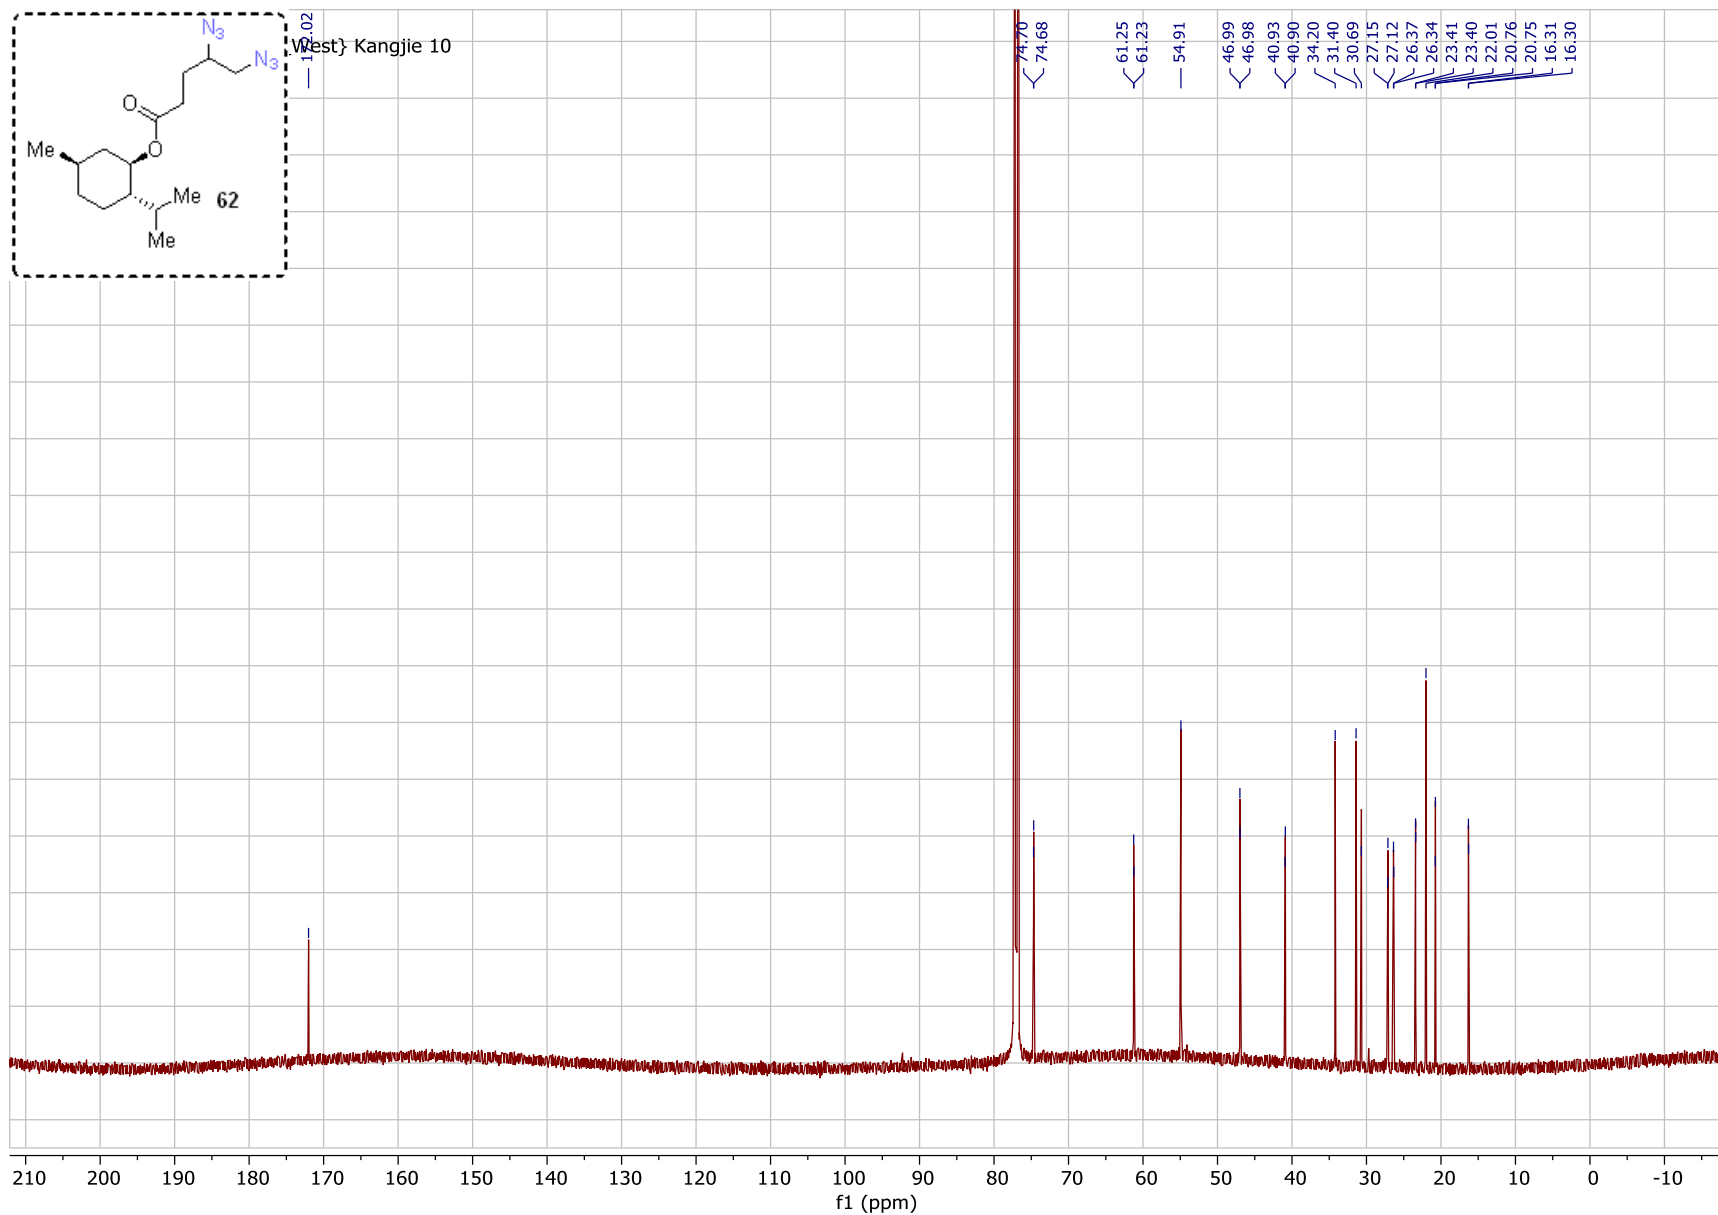

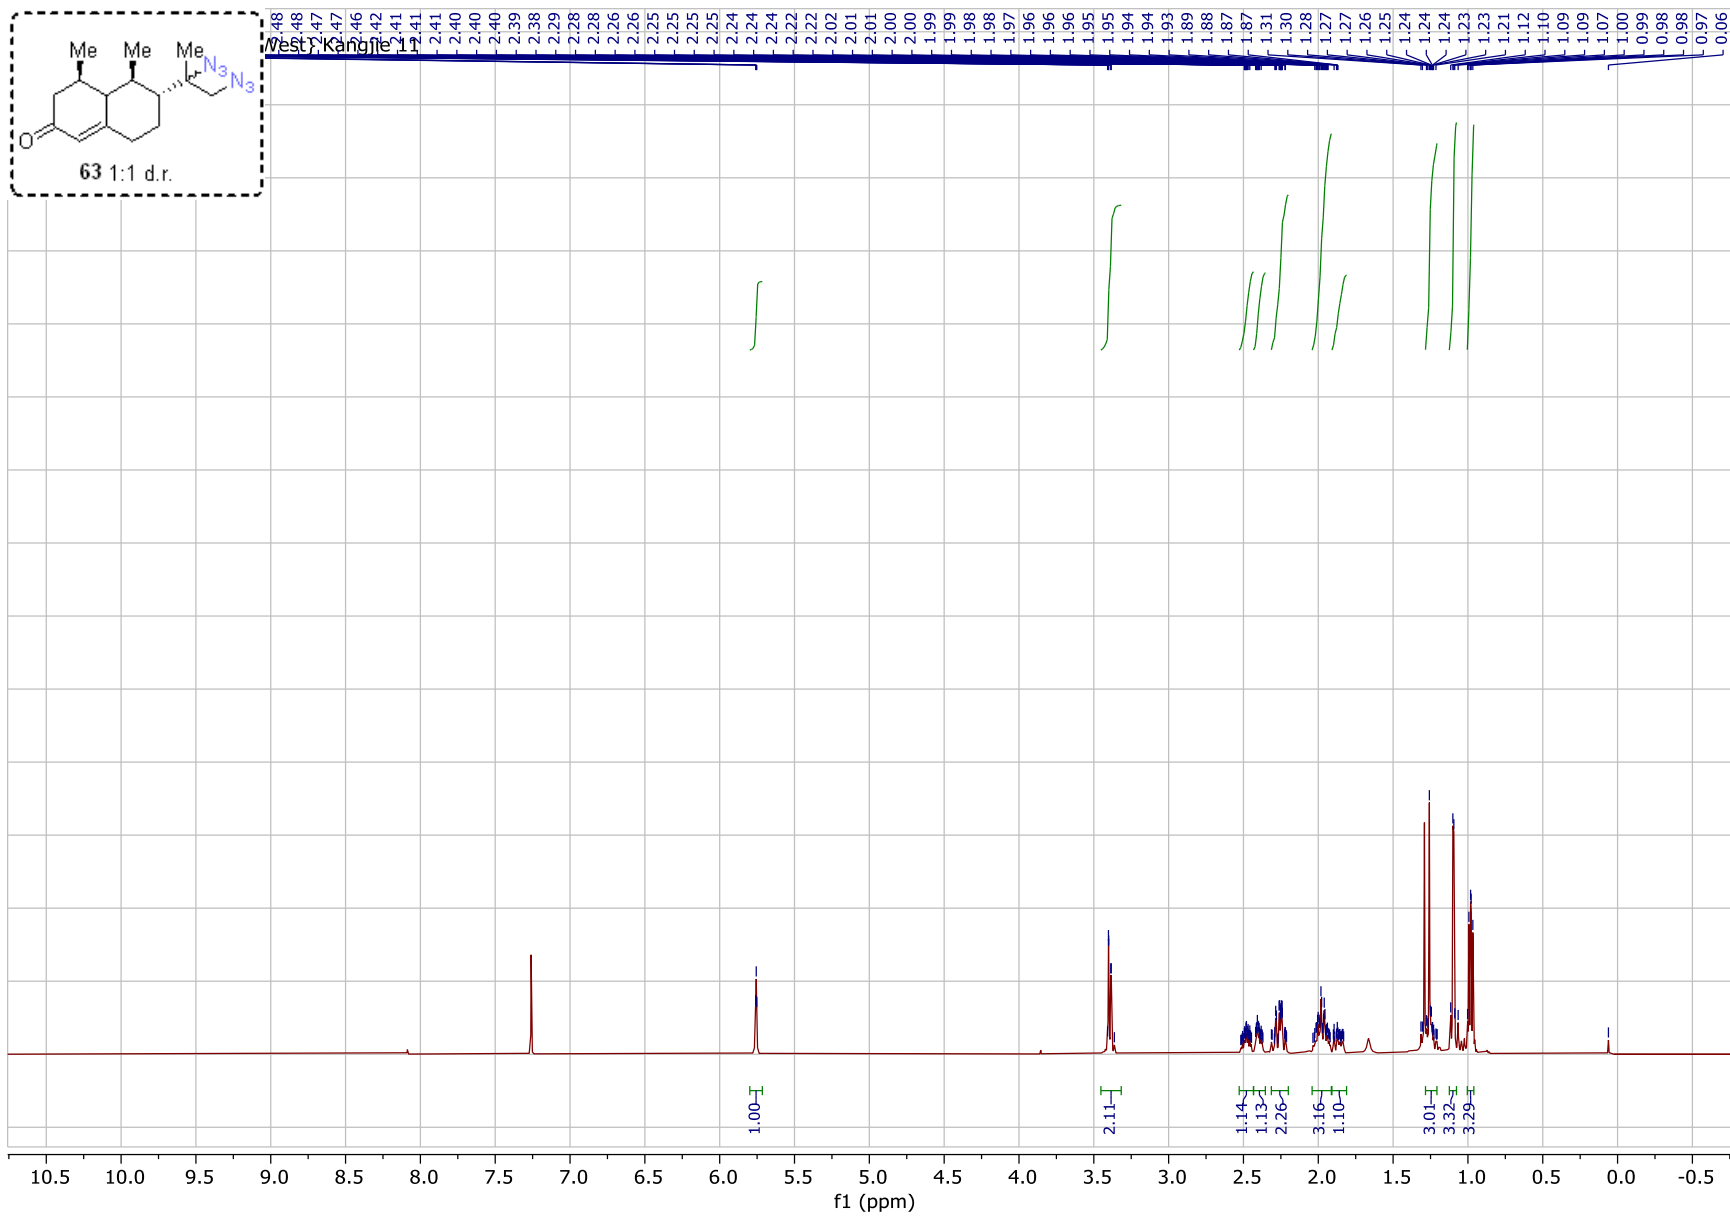

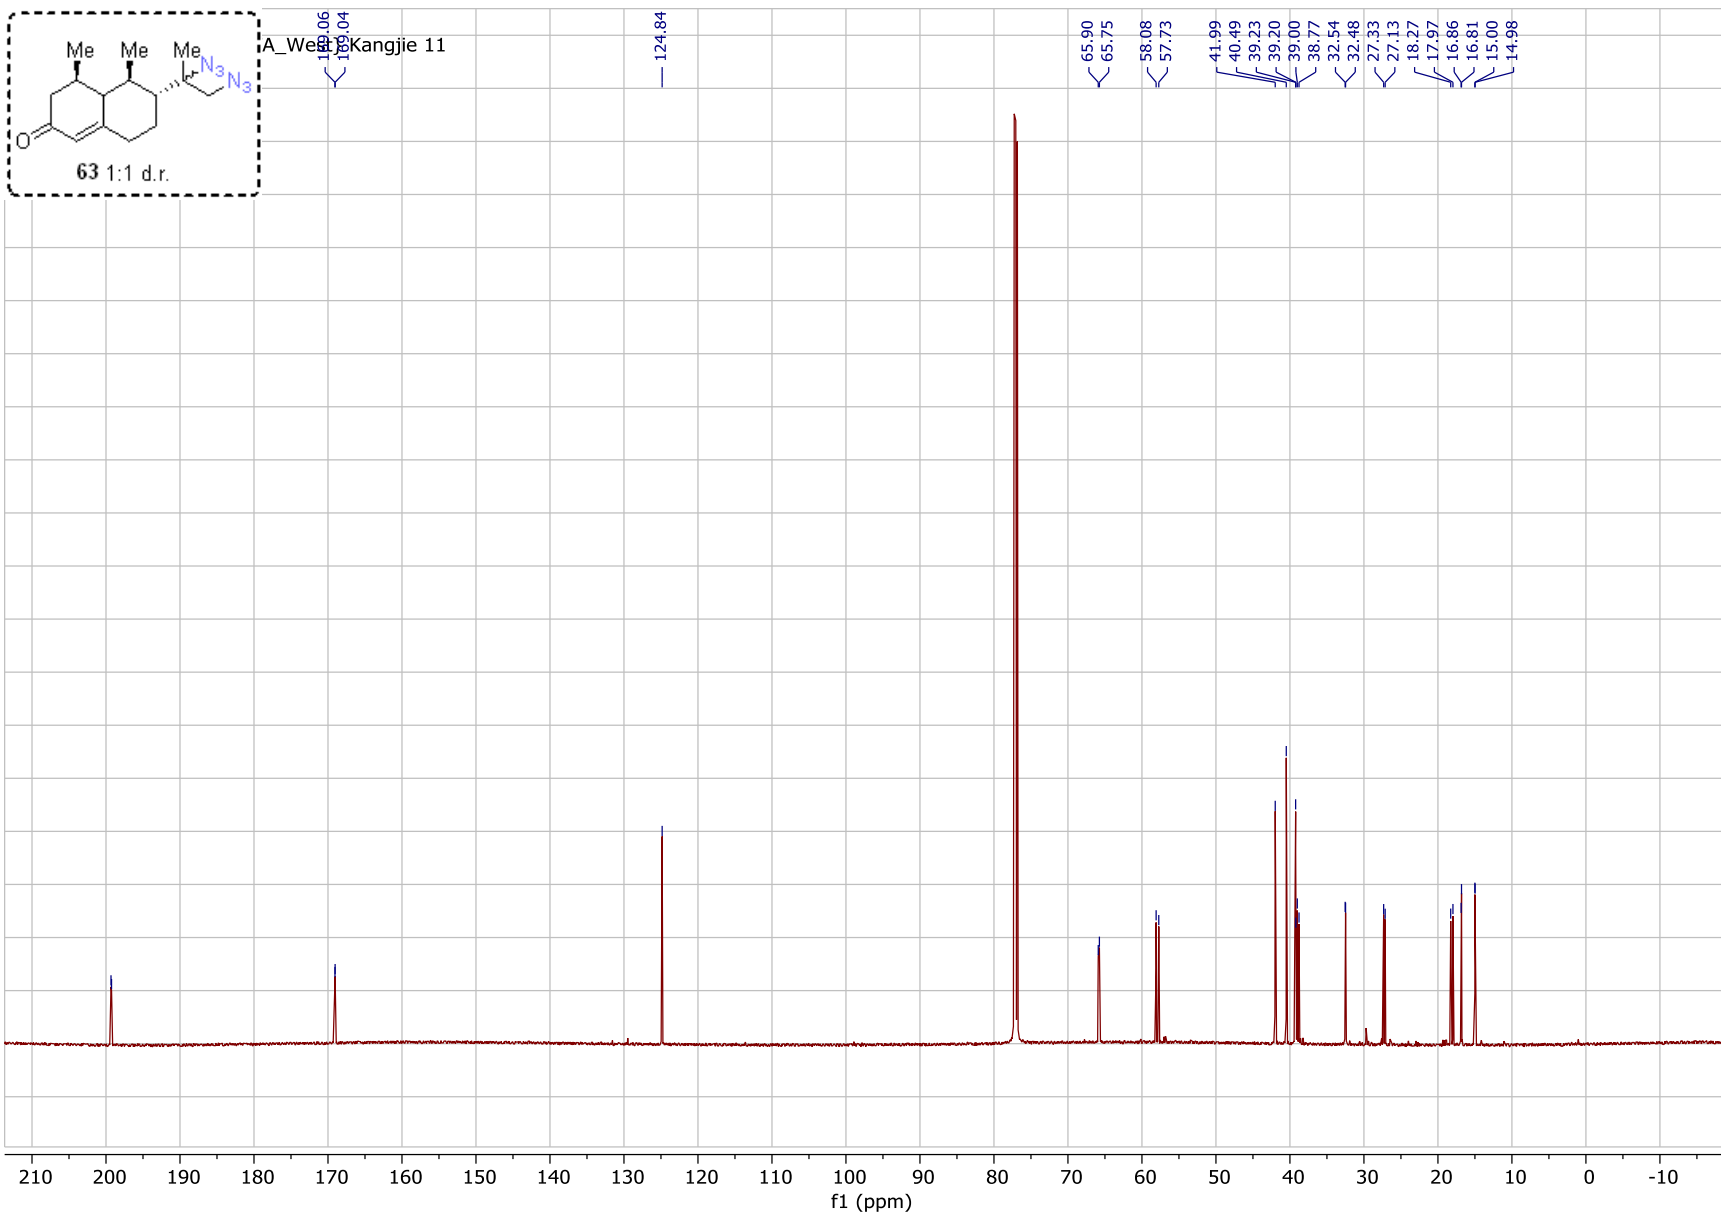

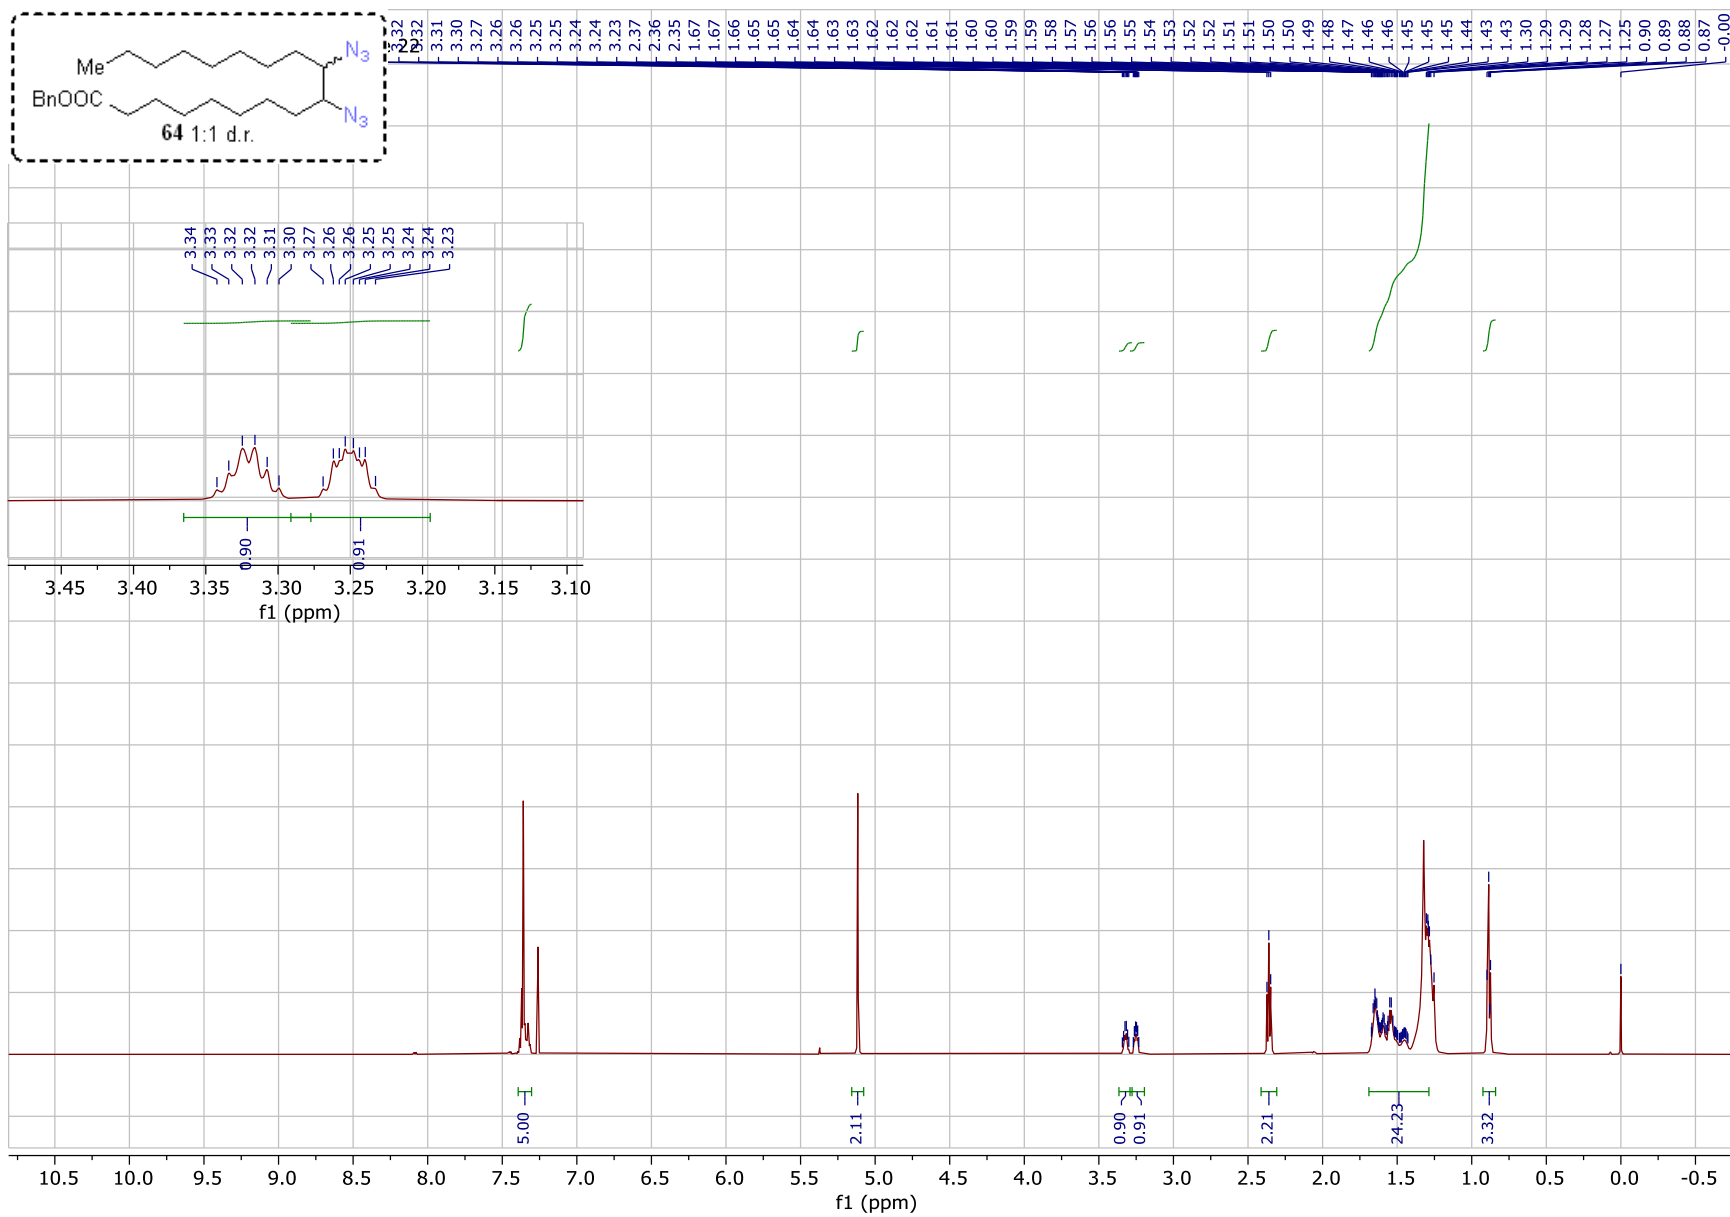

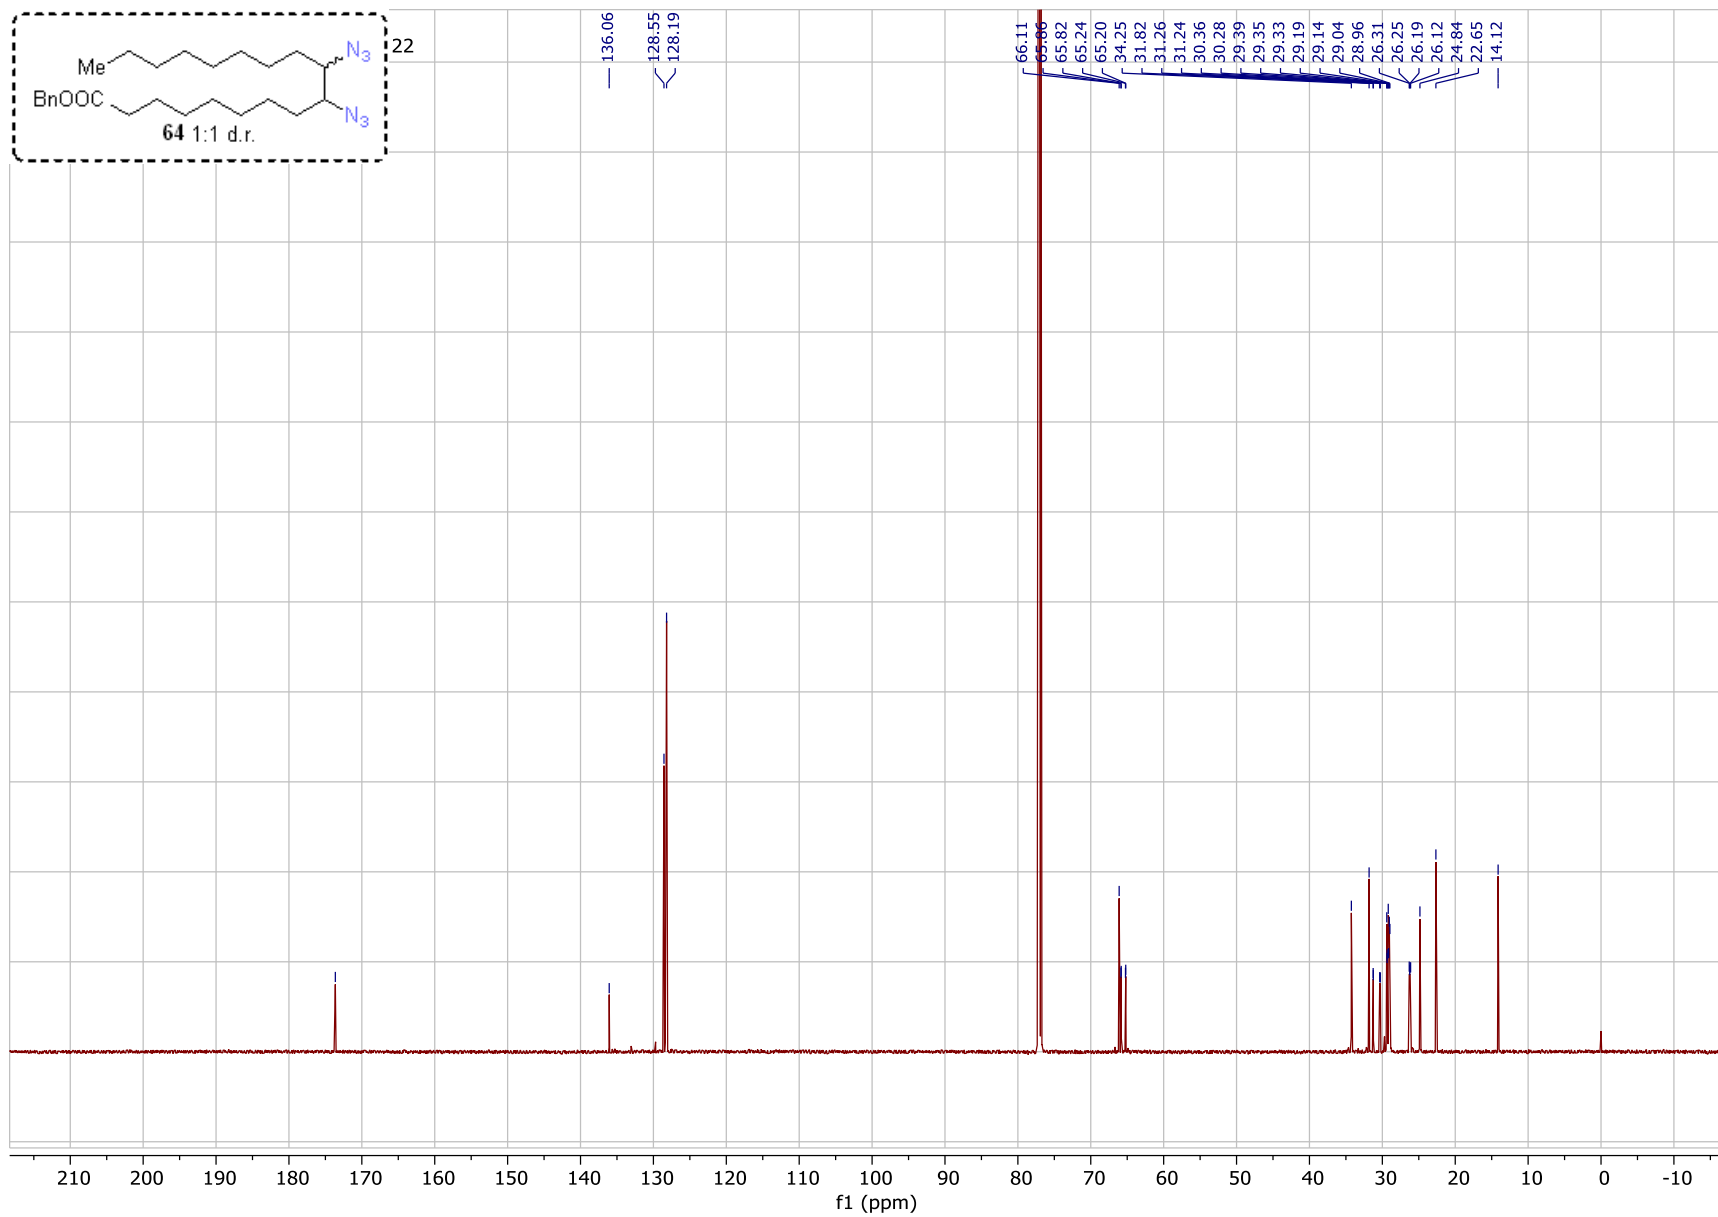

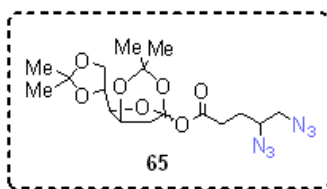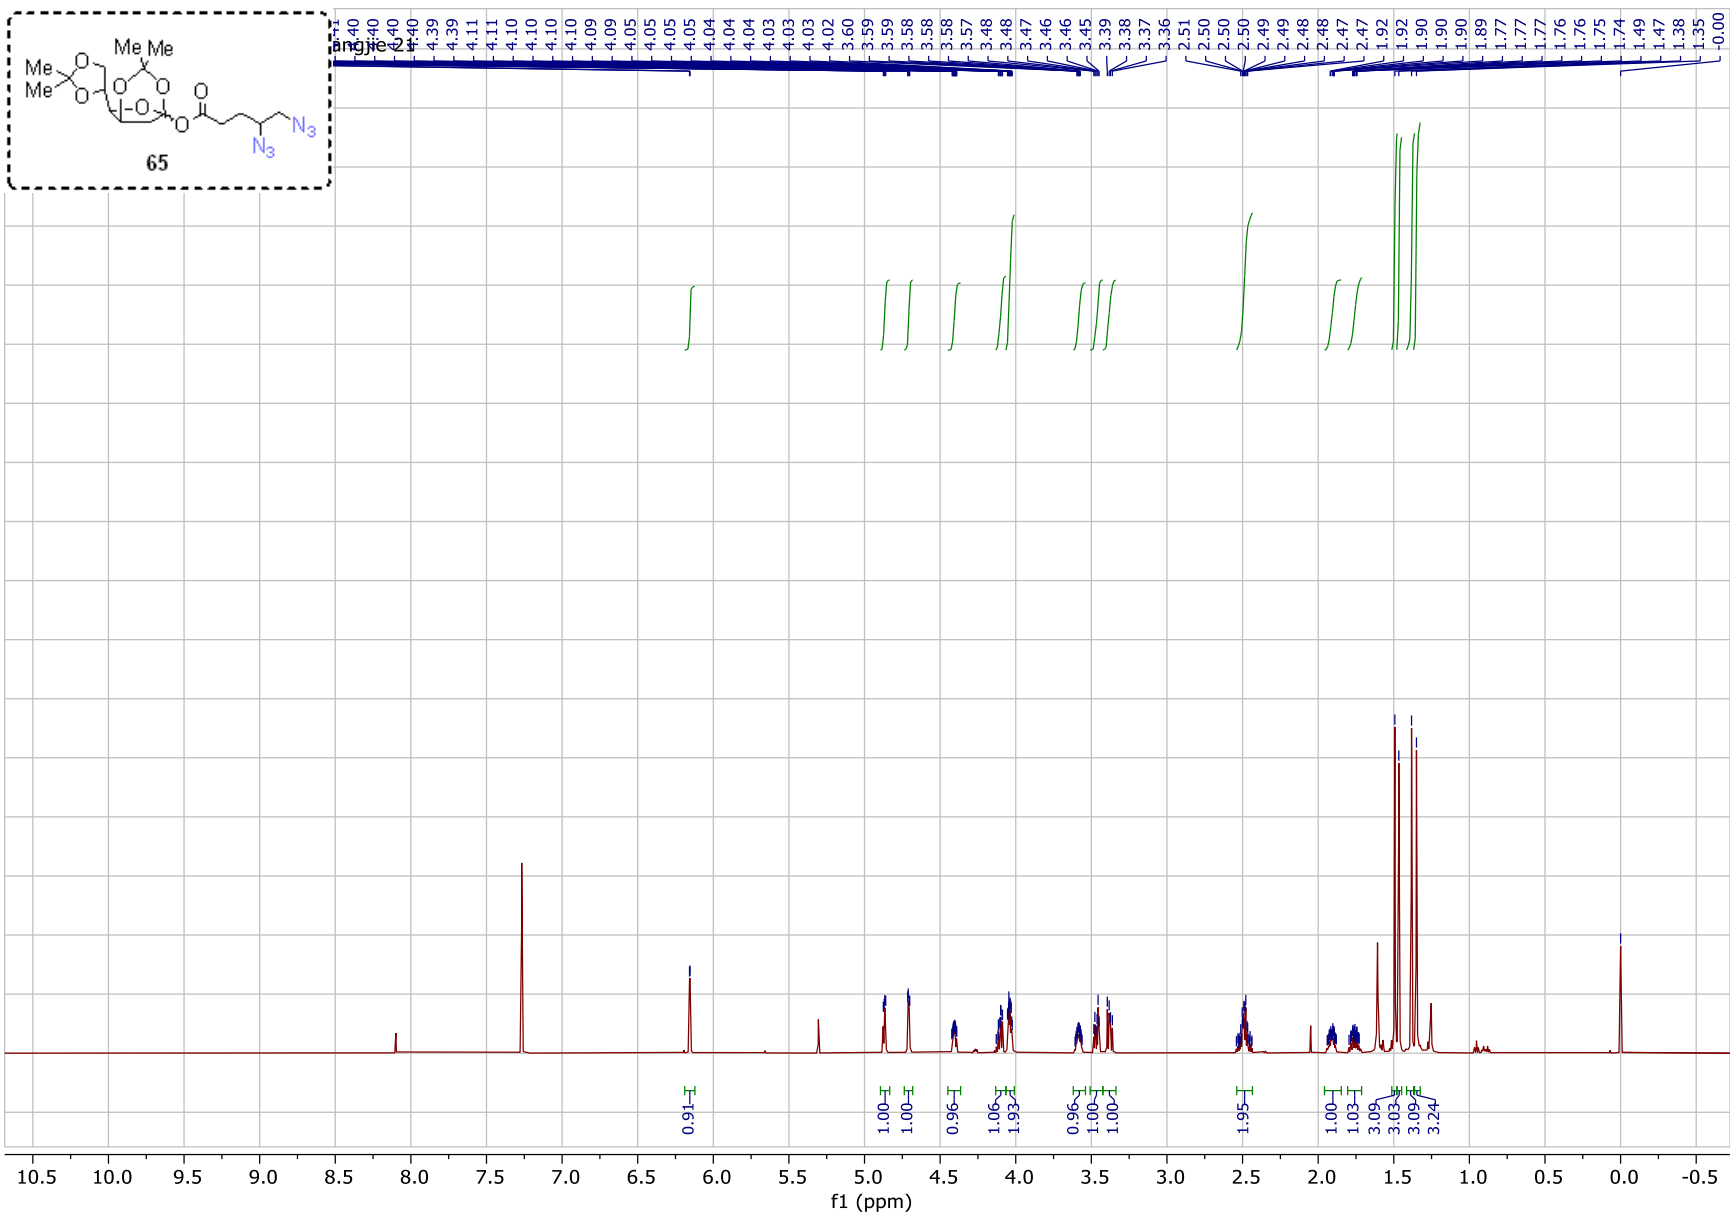

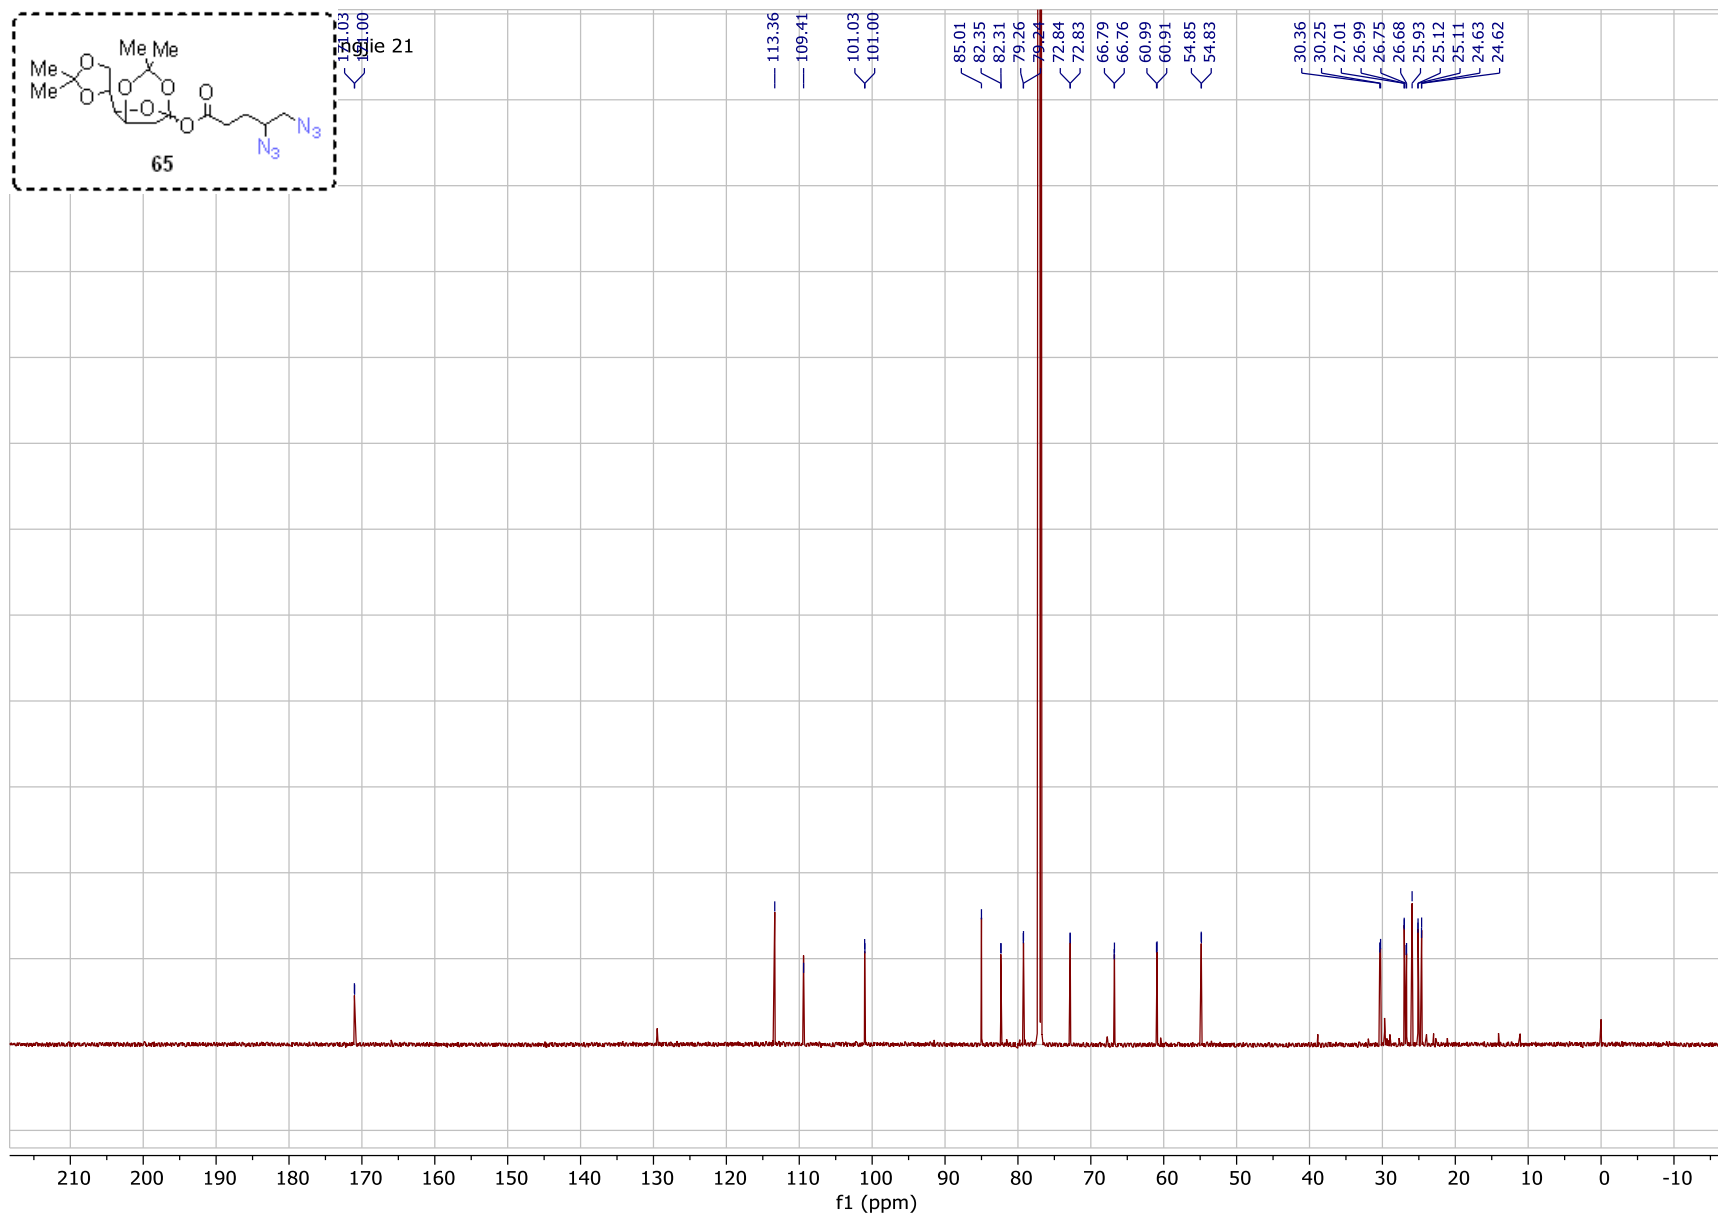



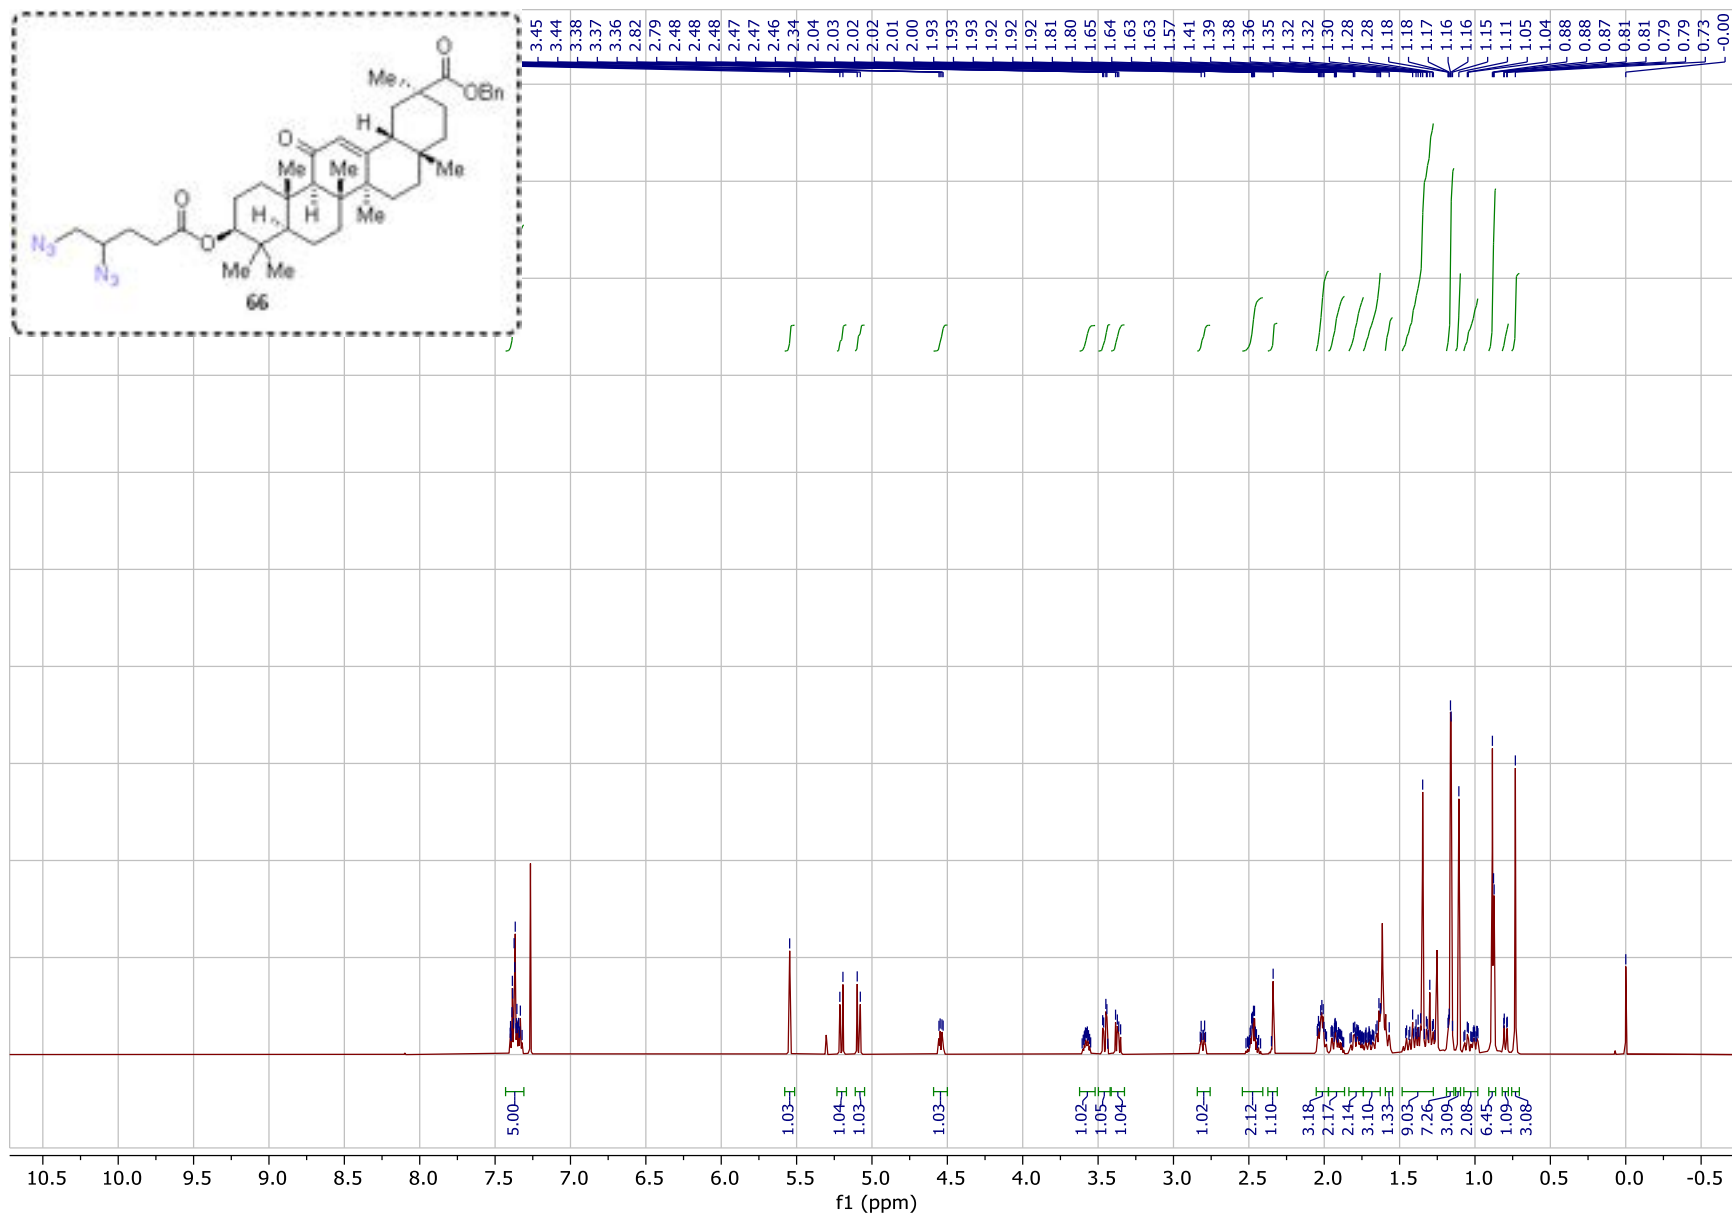

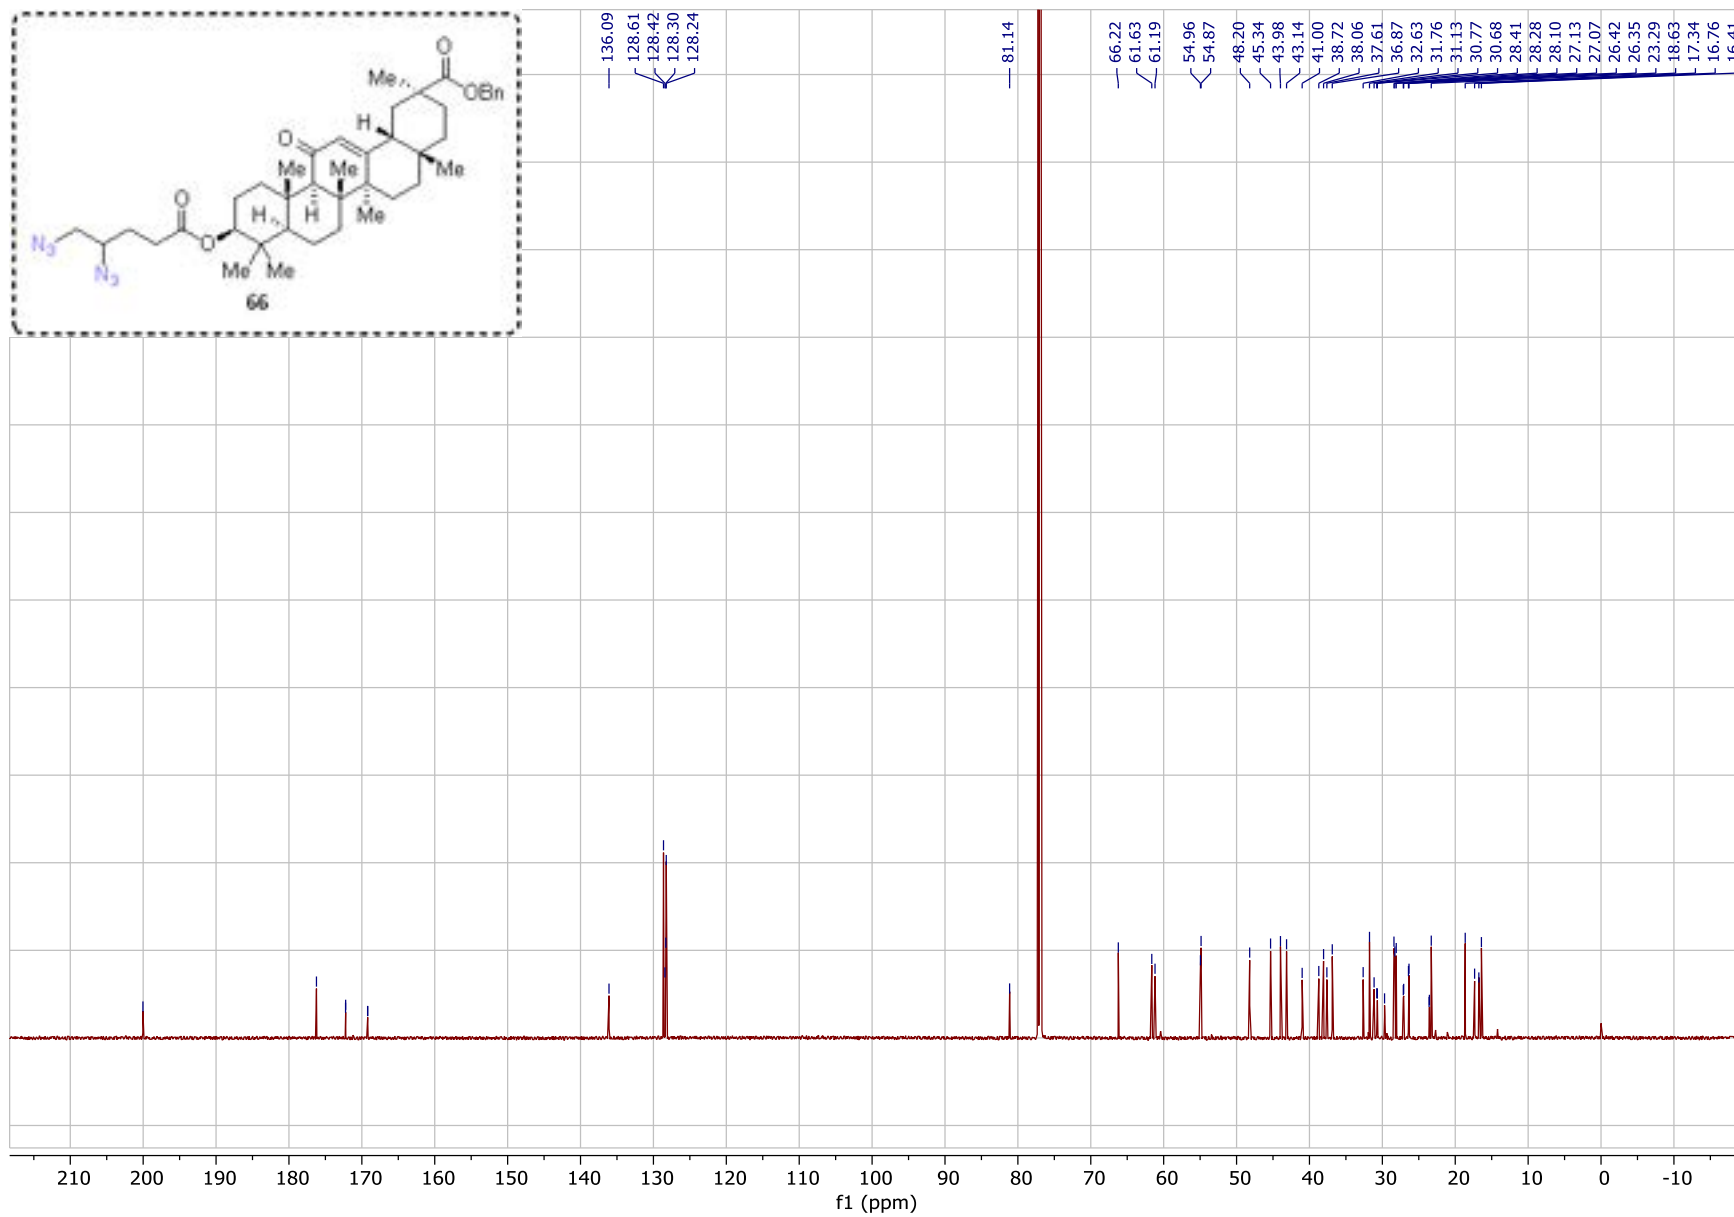

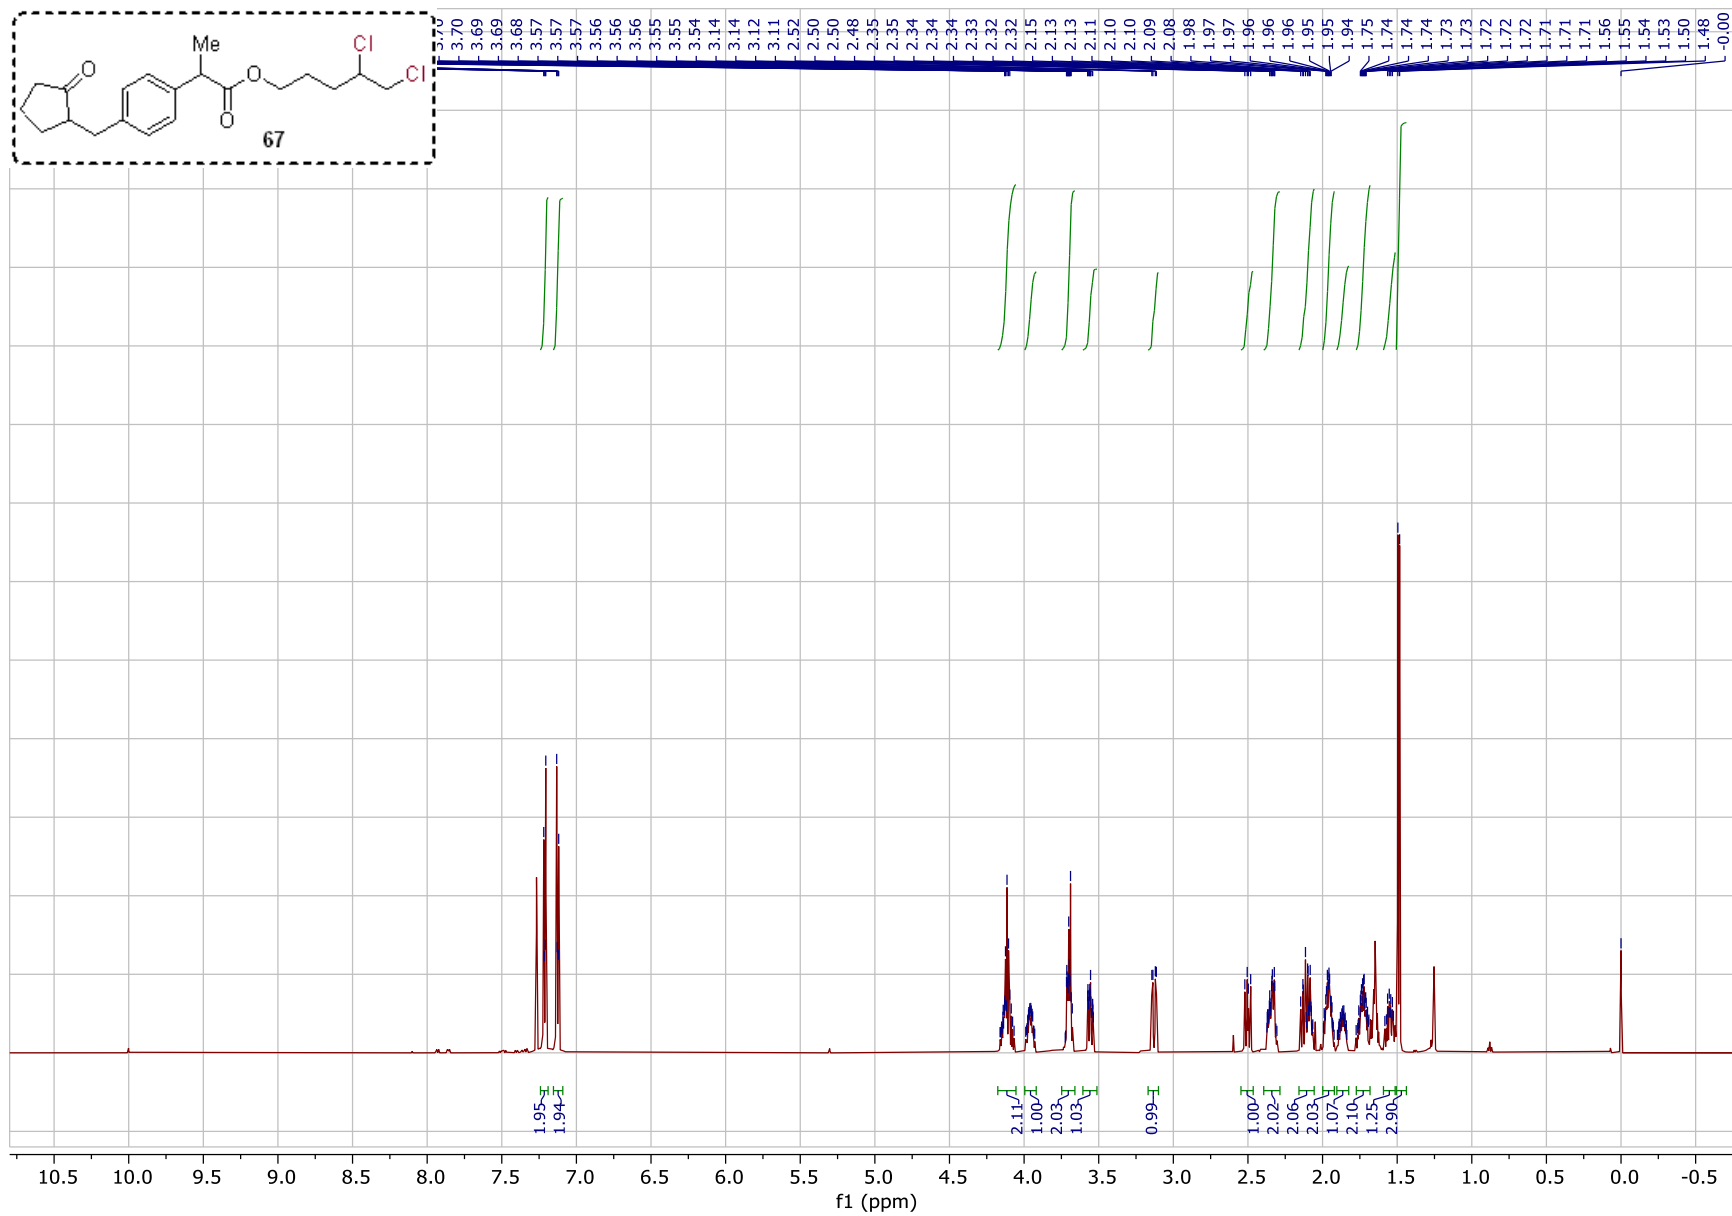

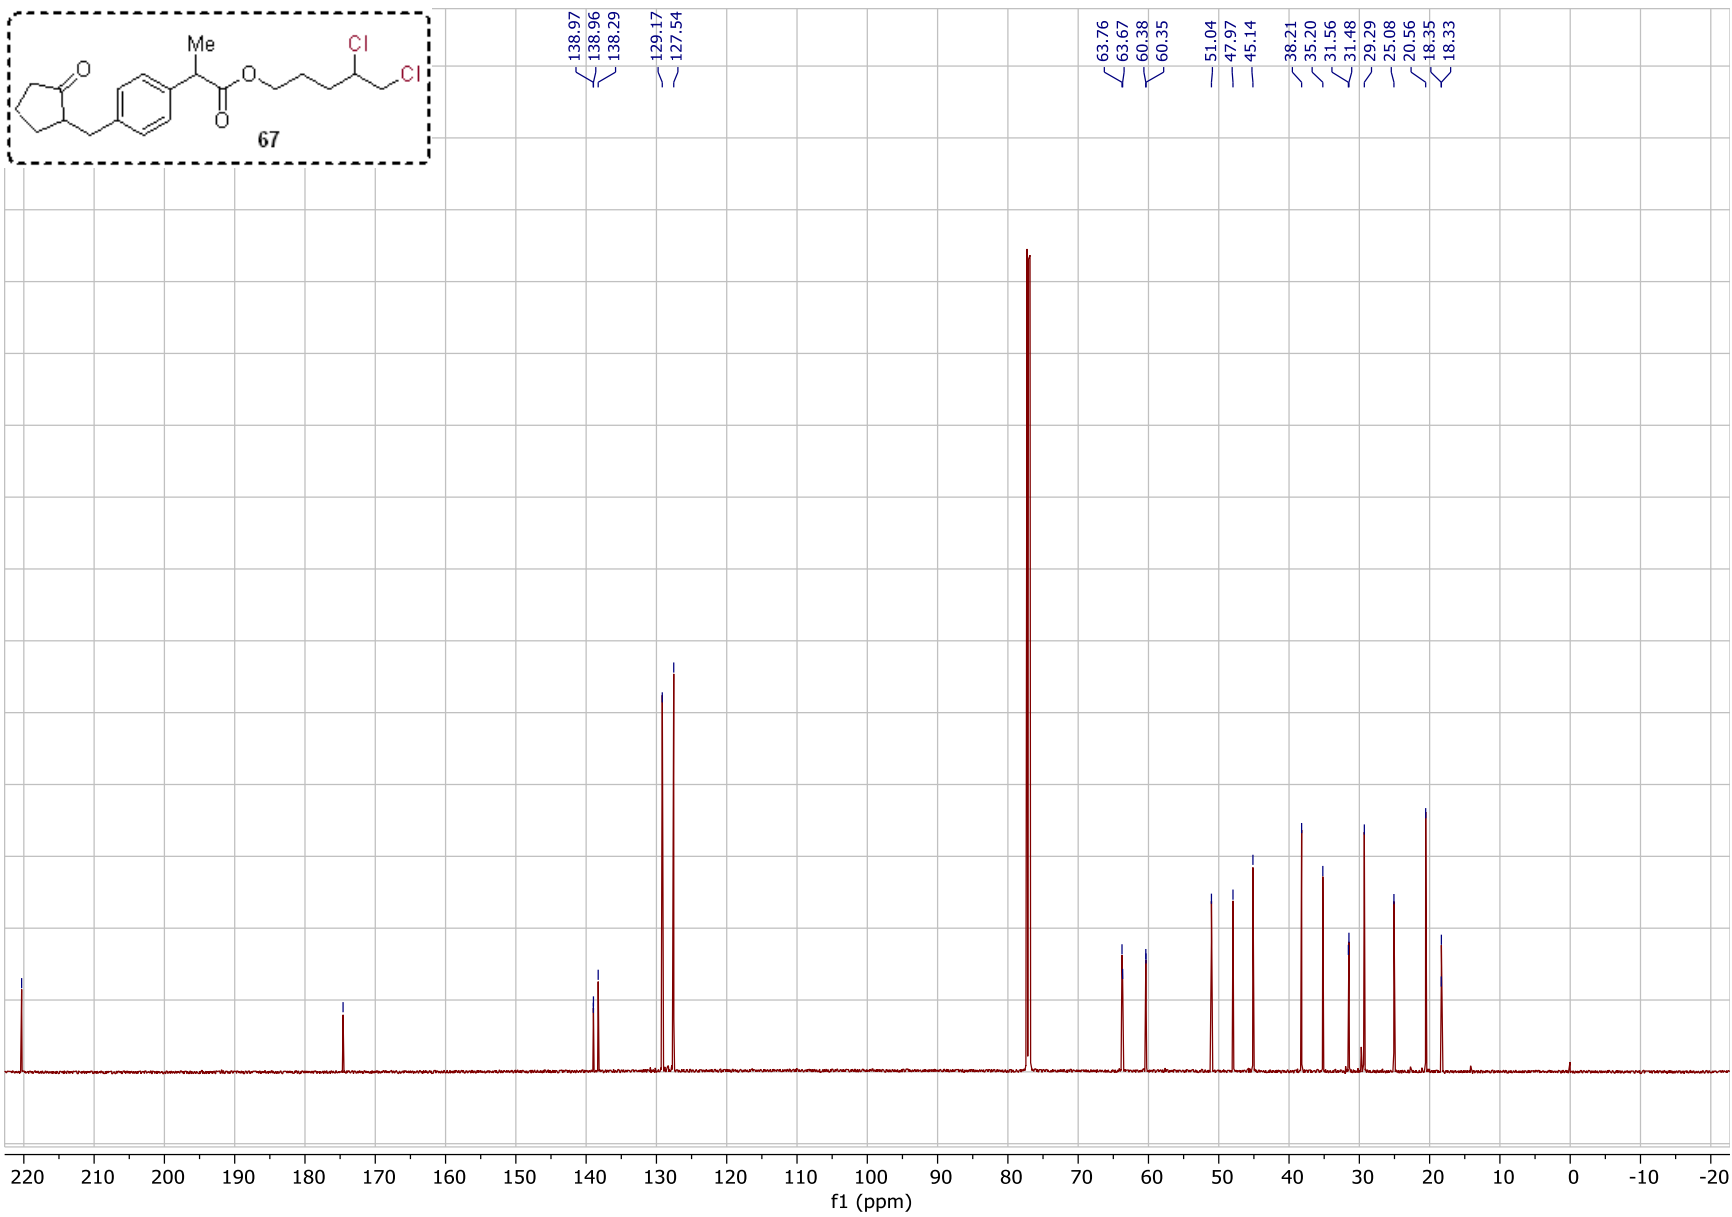

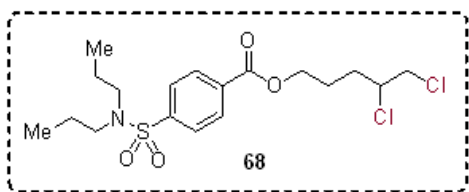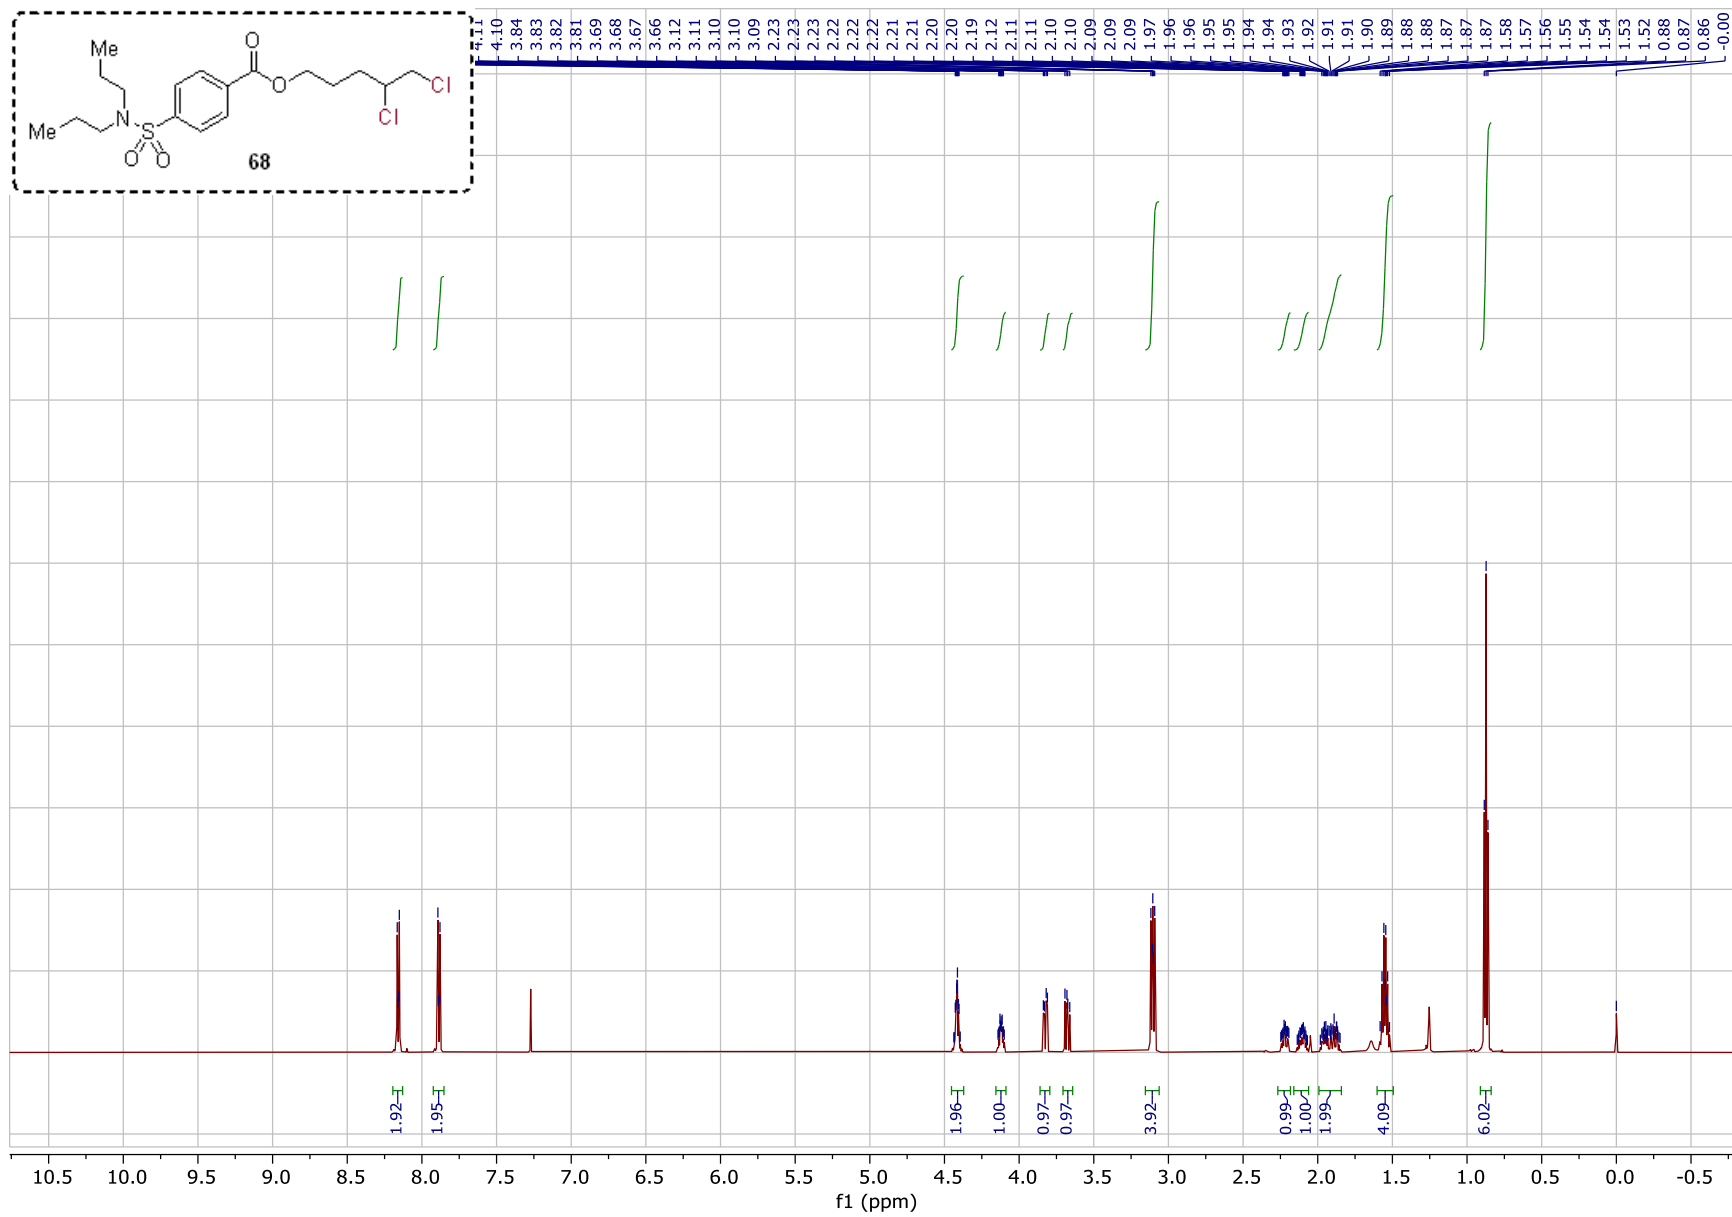

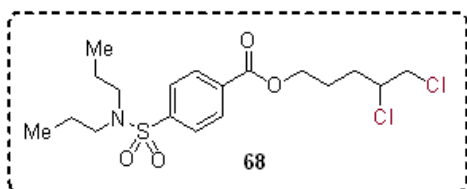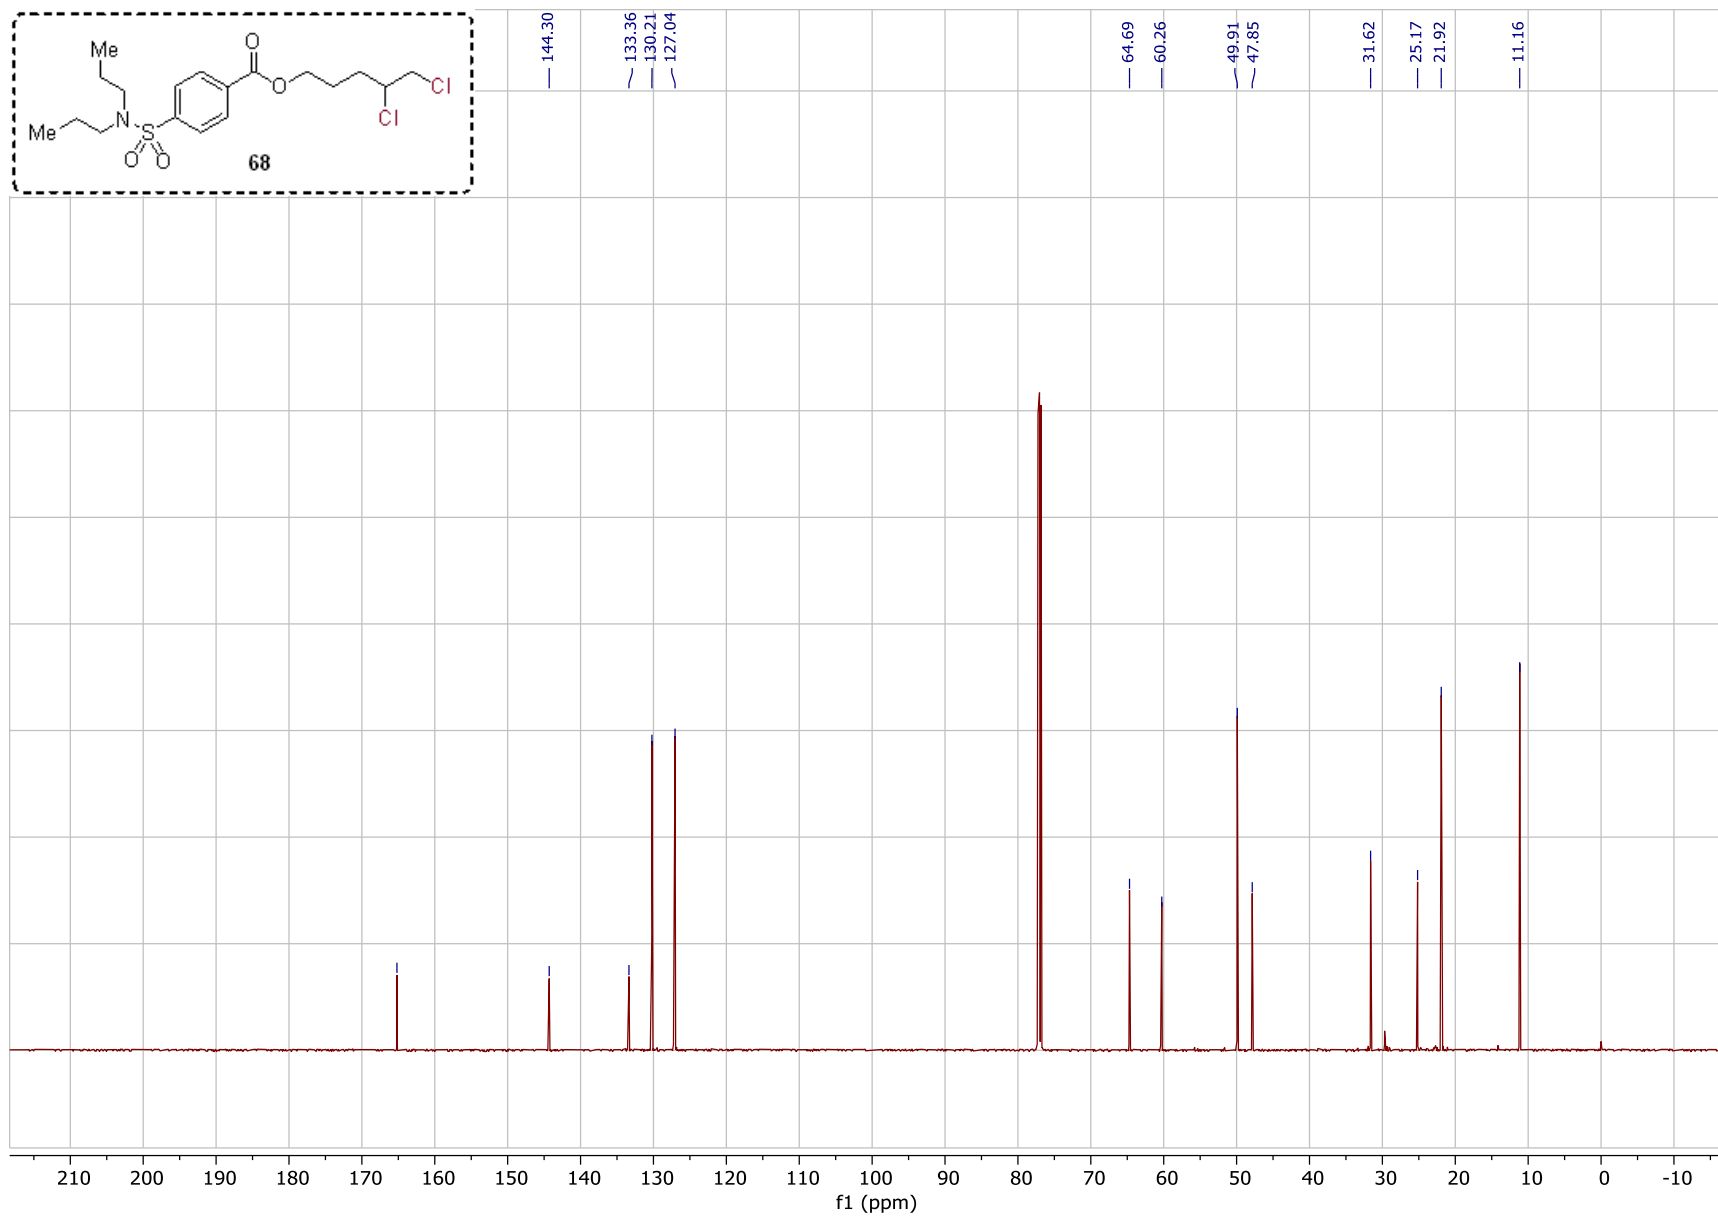

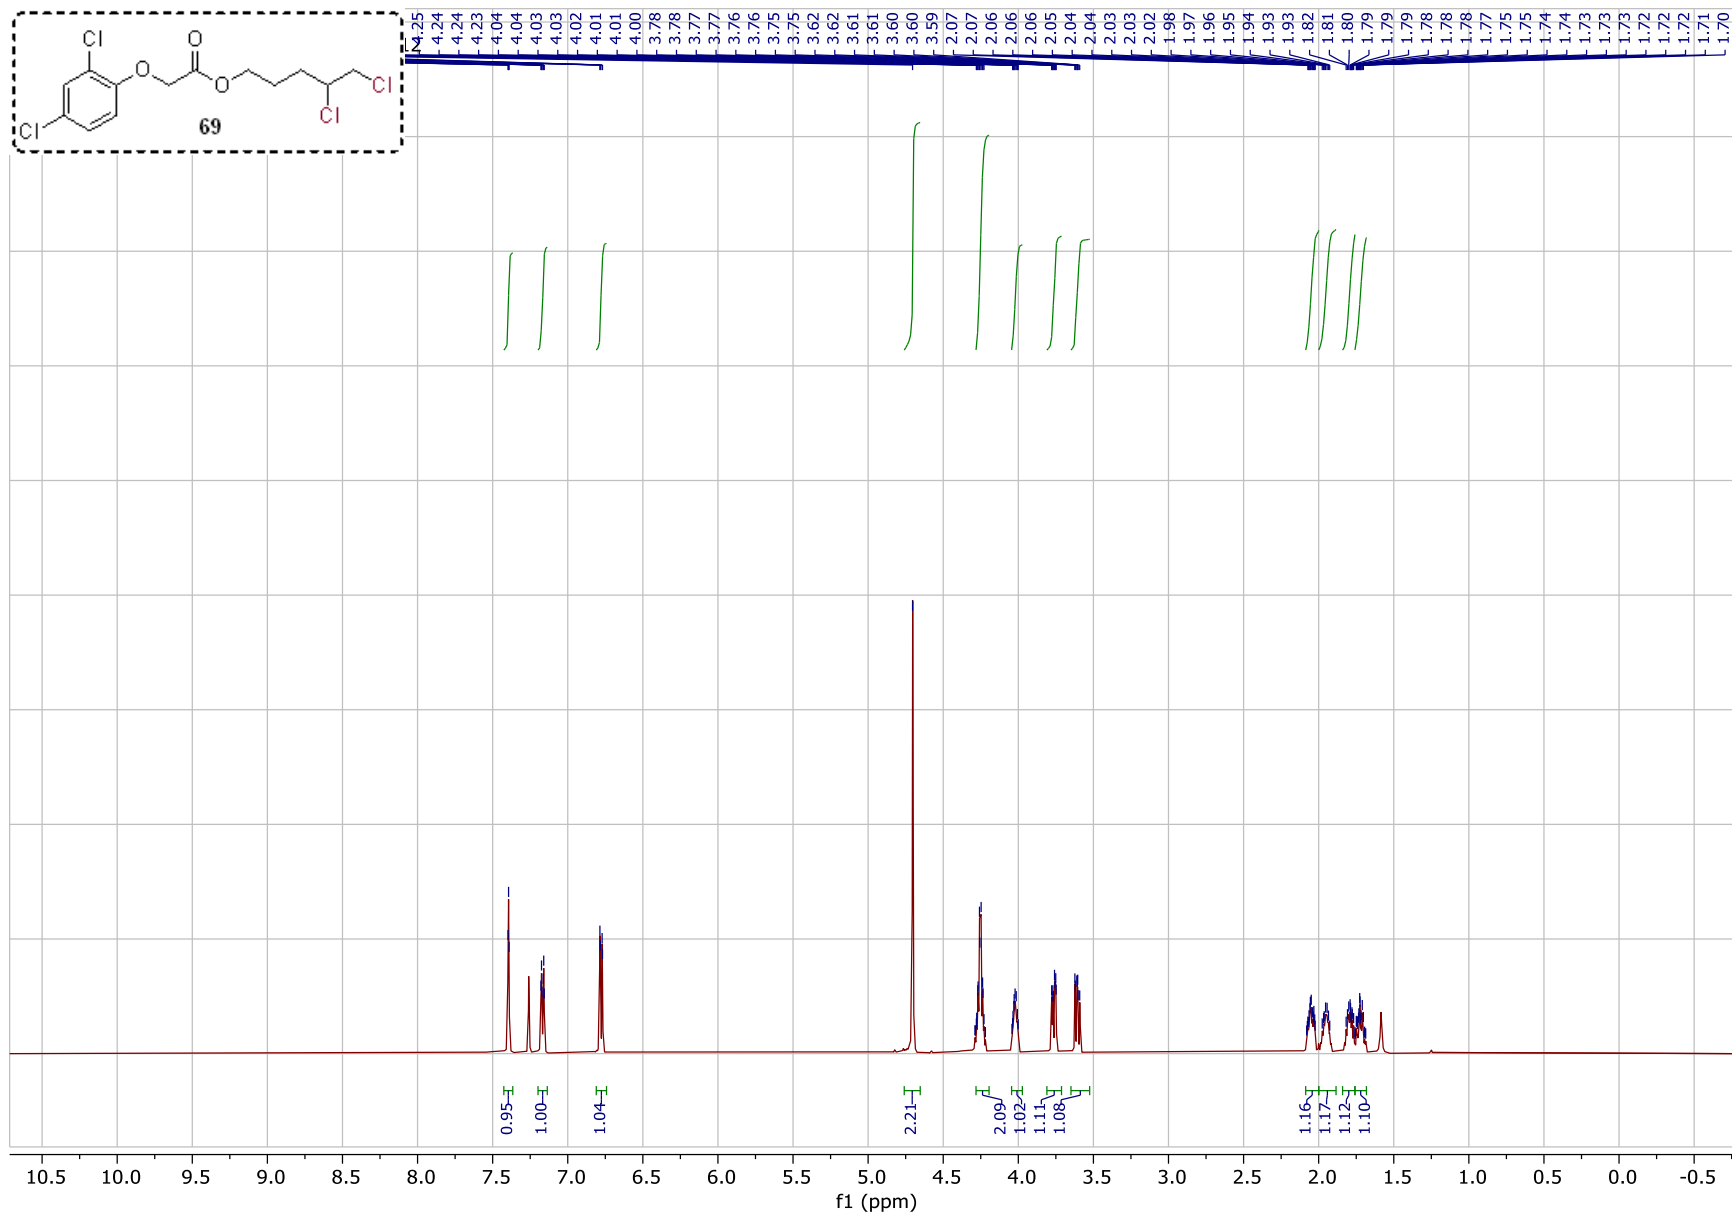

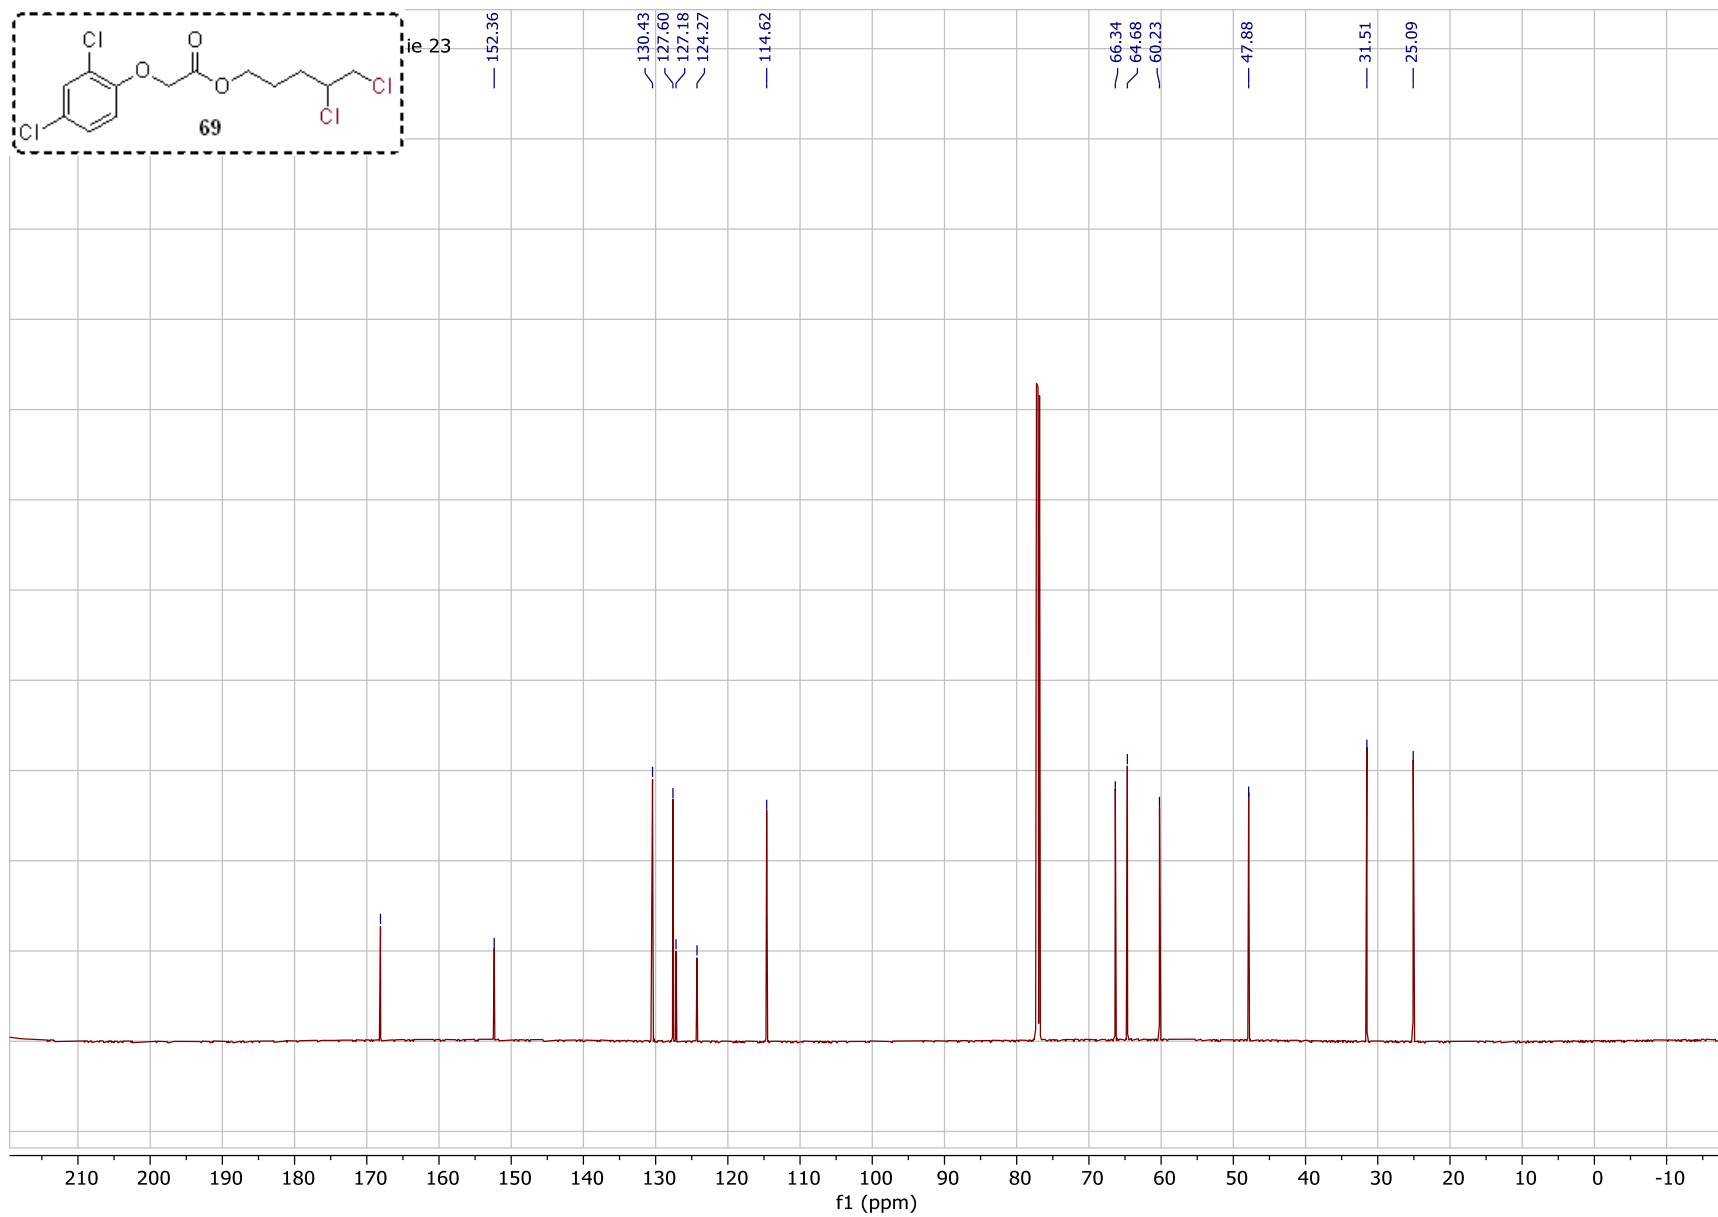



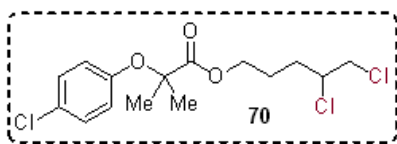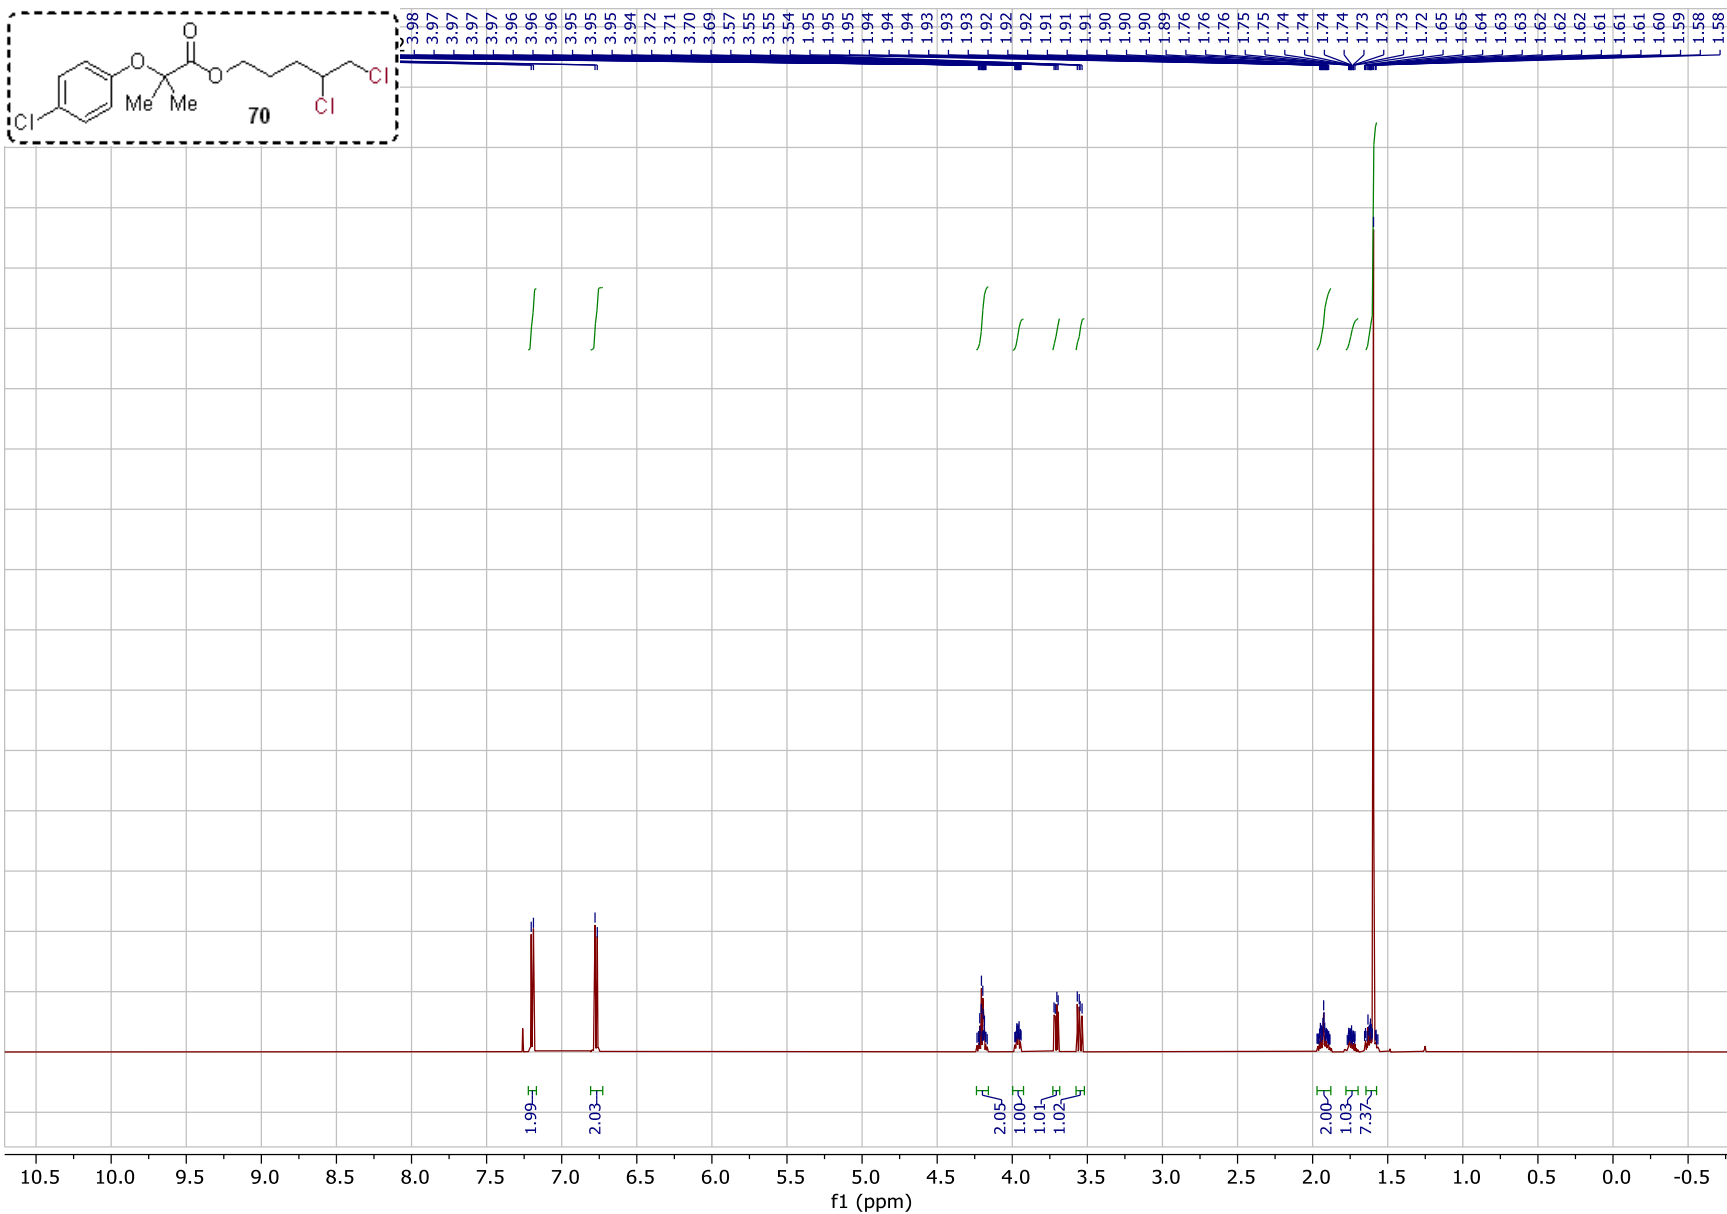

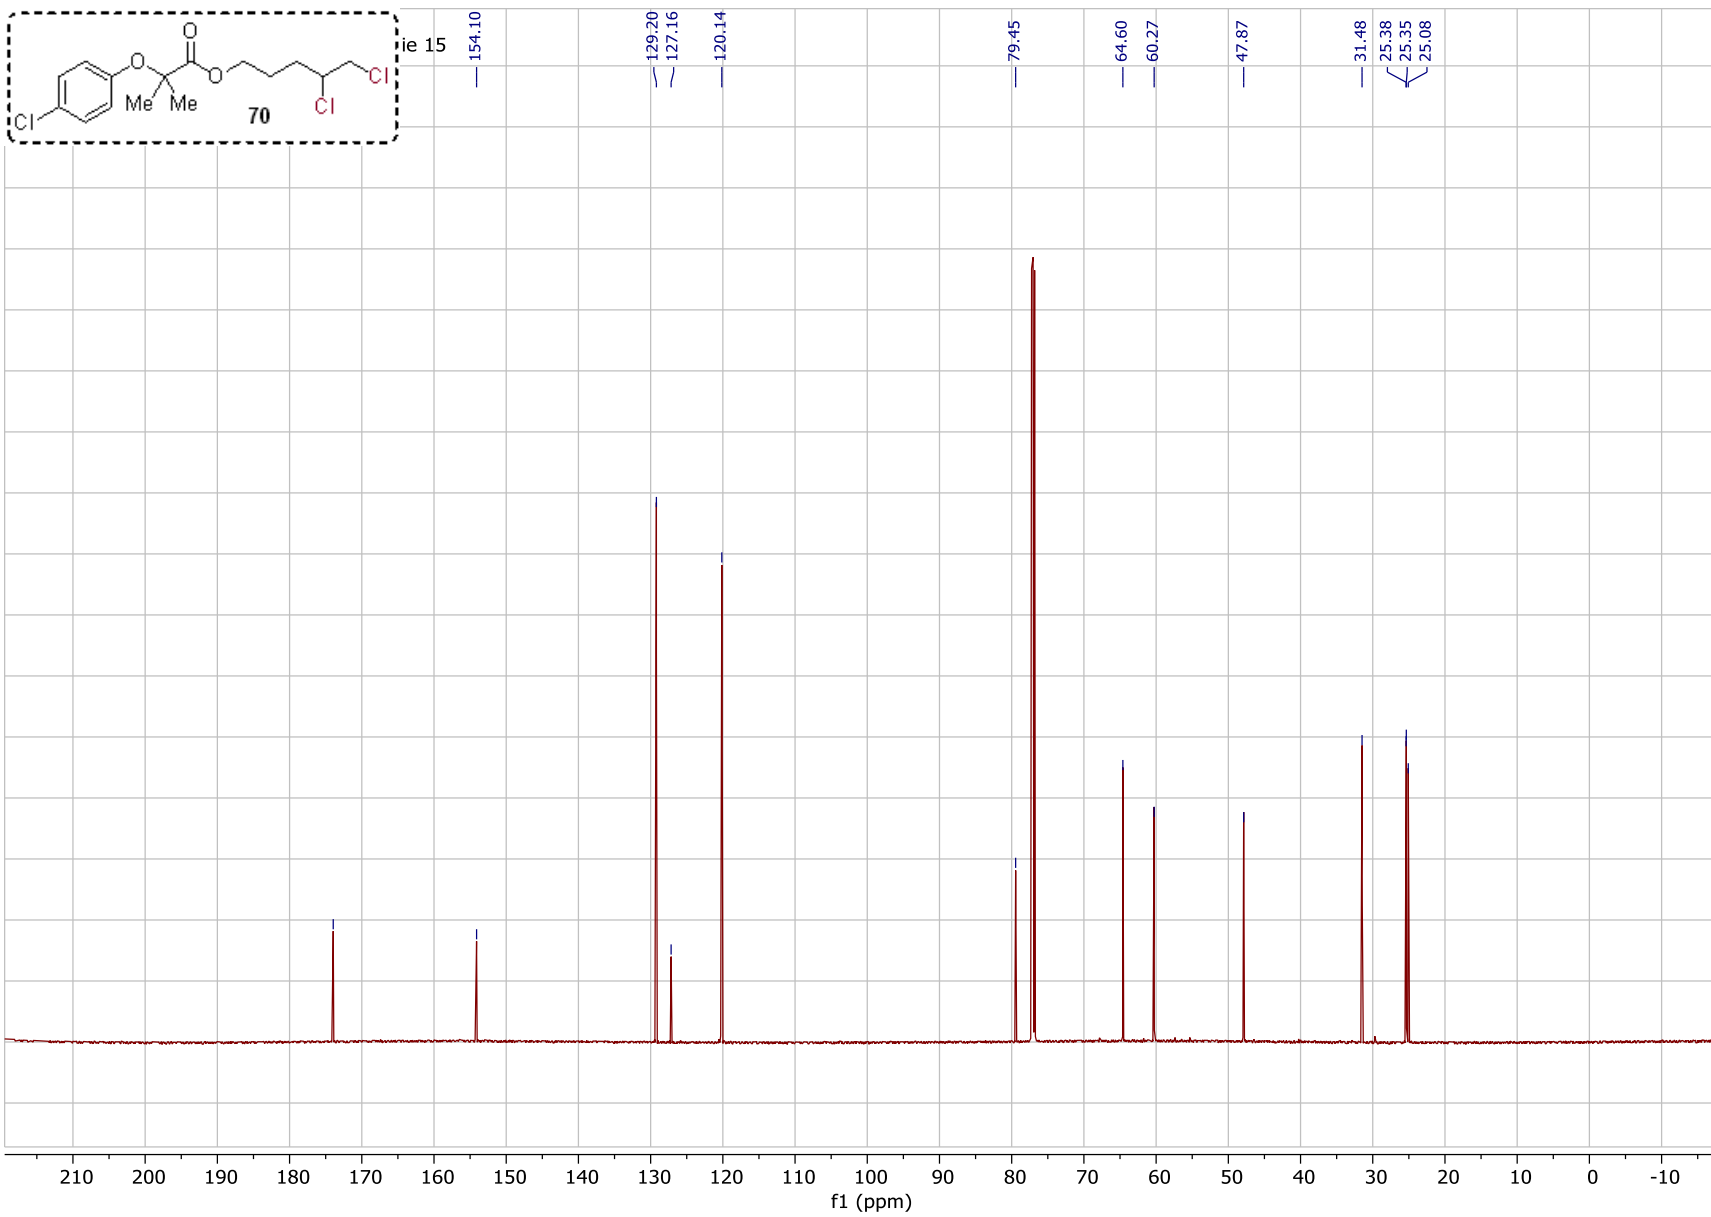

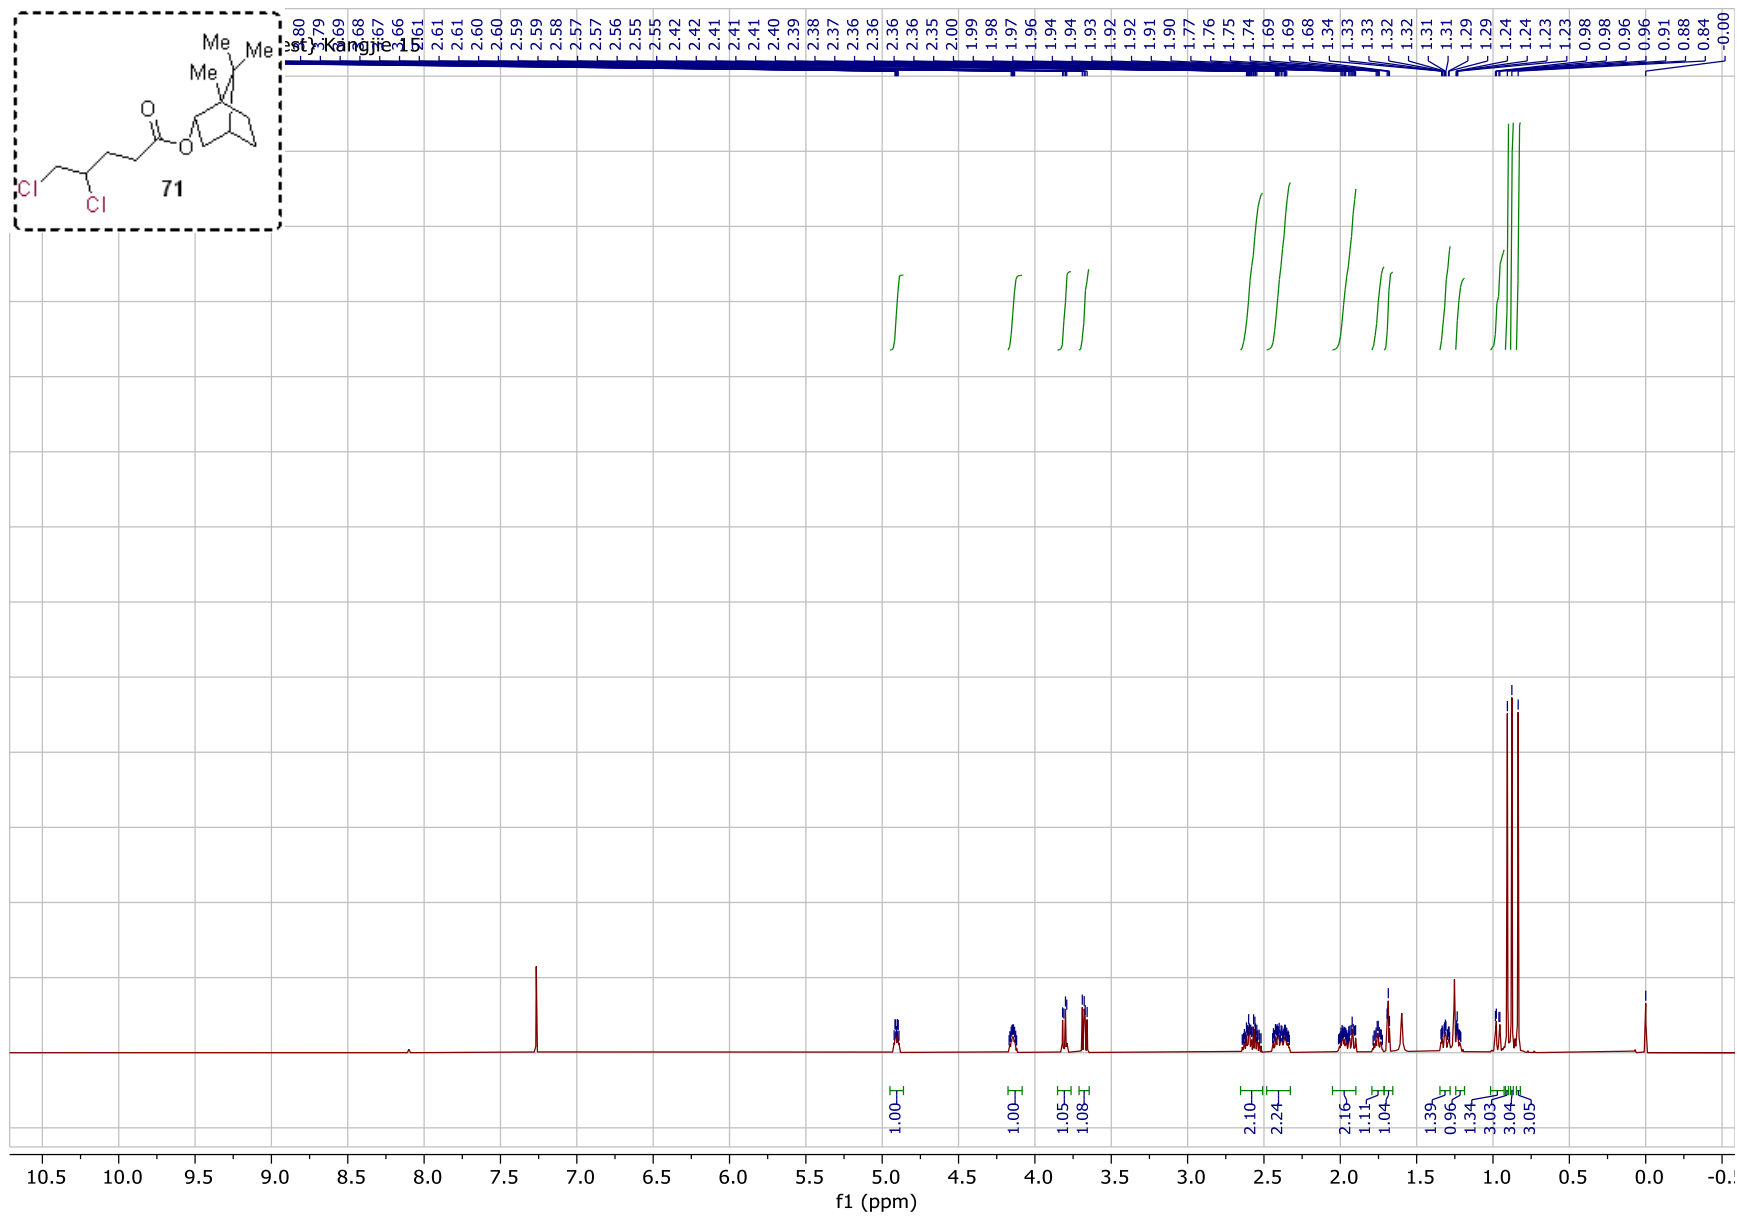

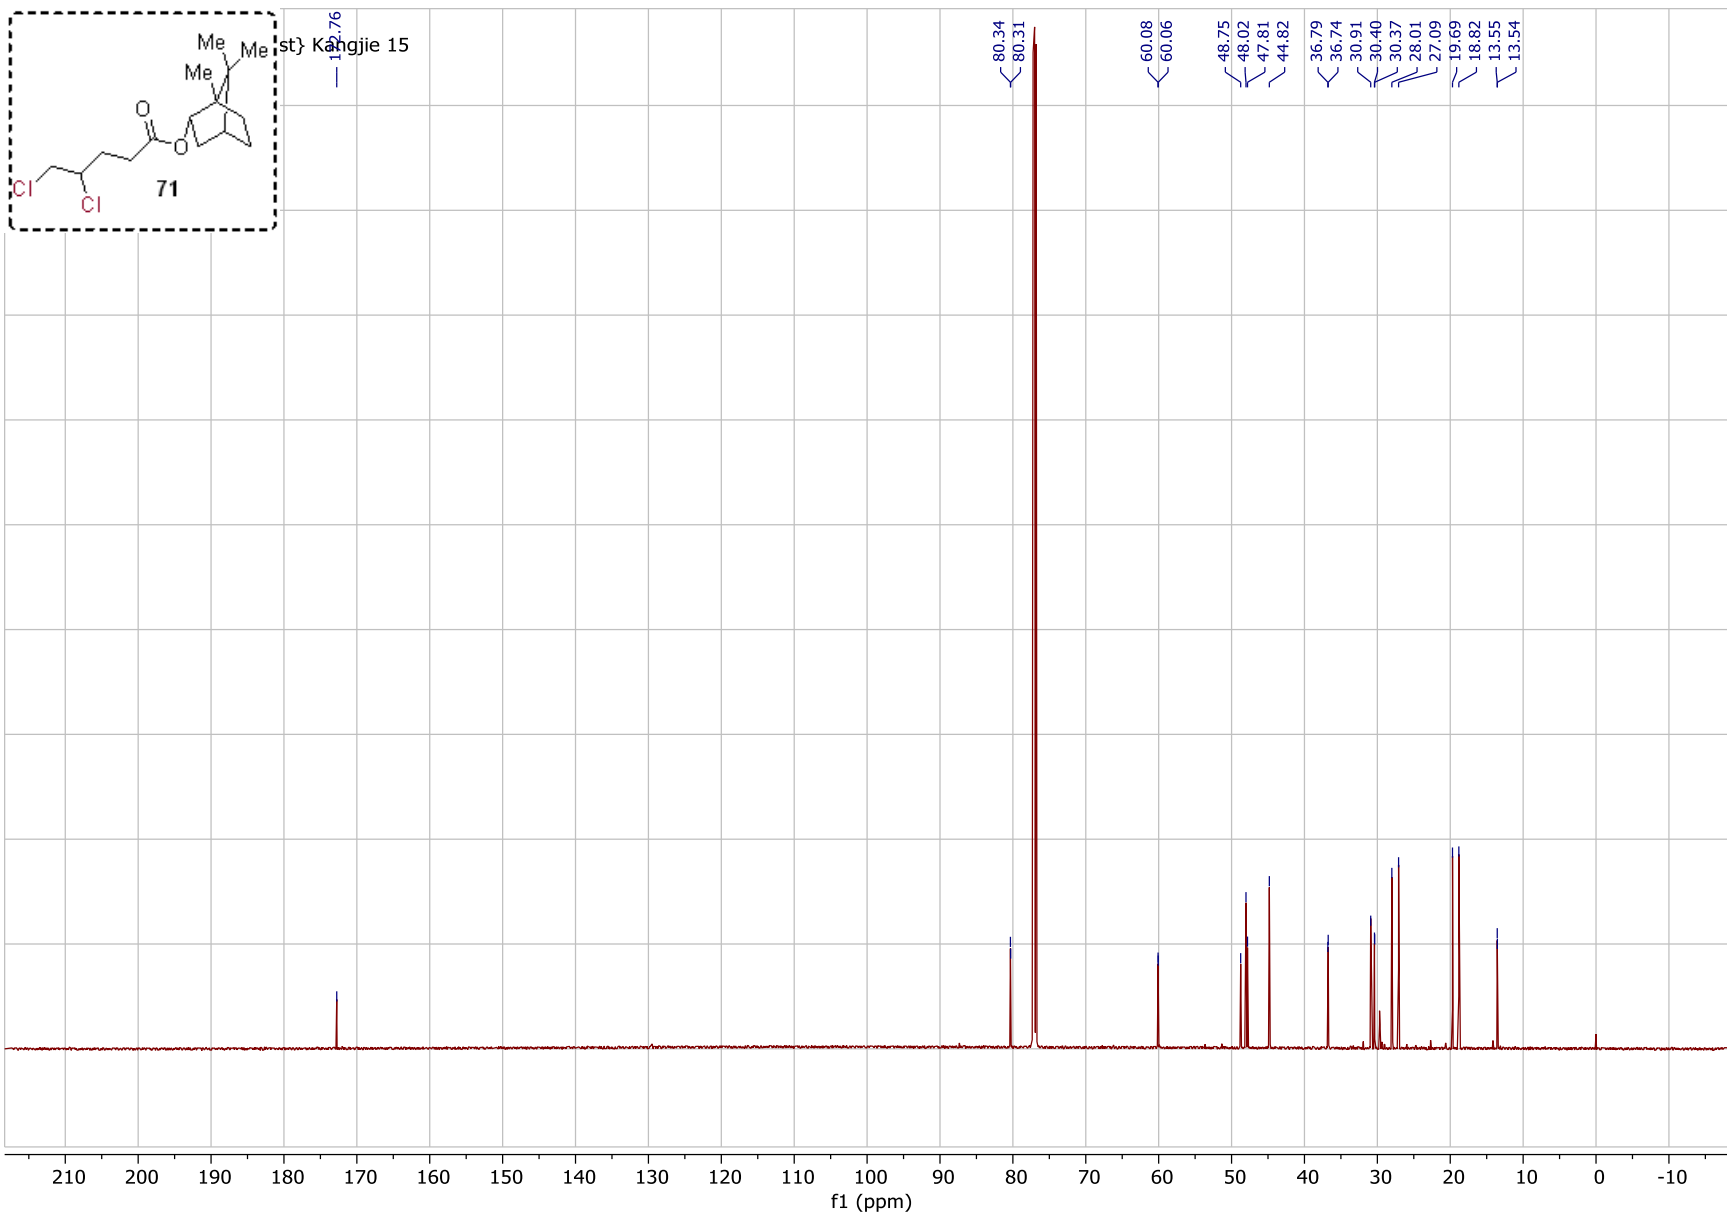

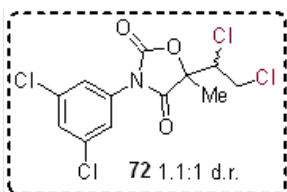

st) Kangjie 2

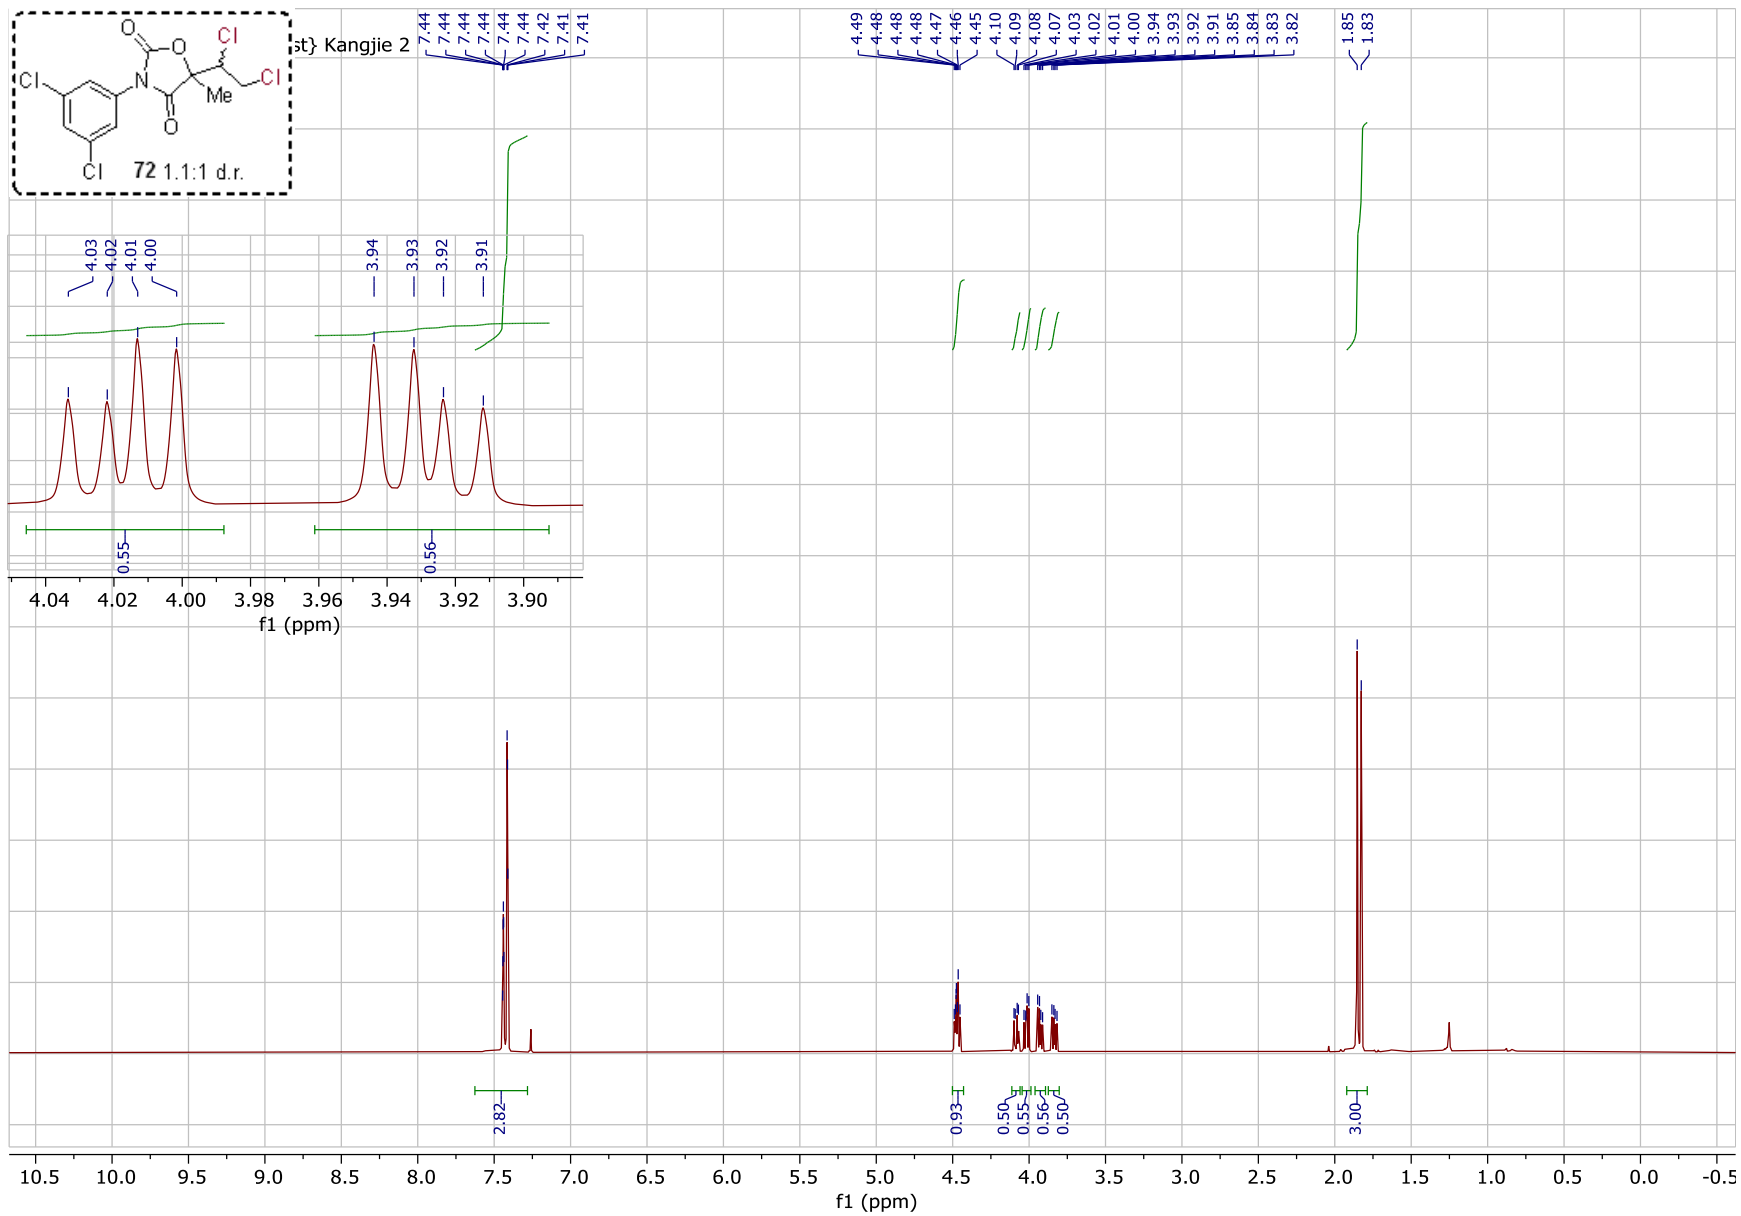

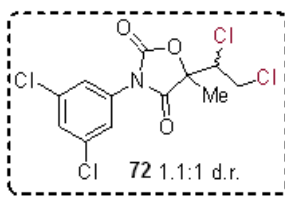

West Kangjie 2

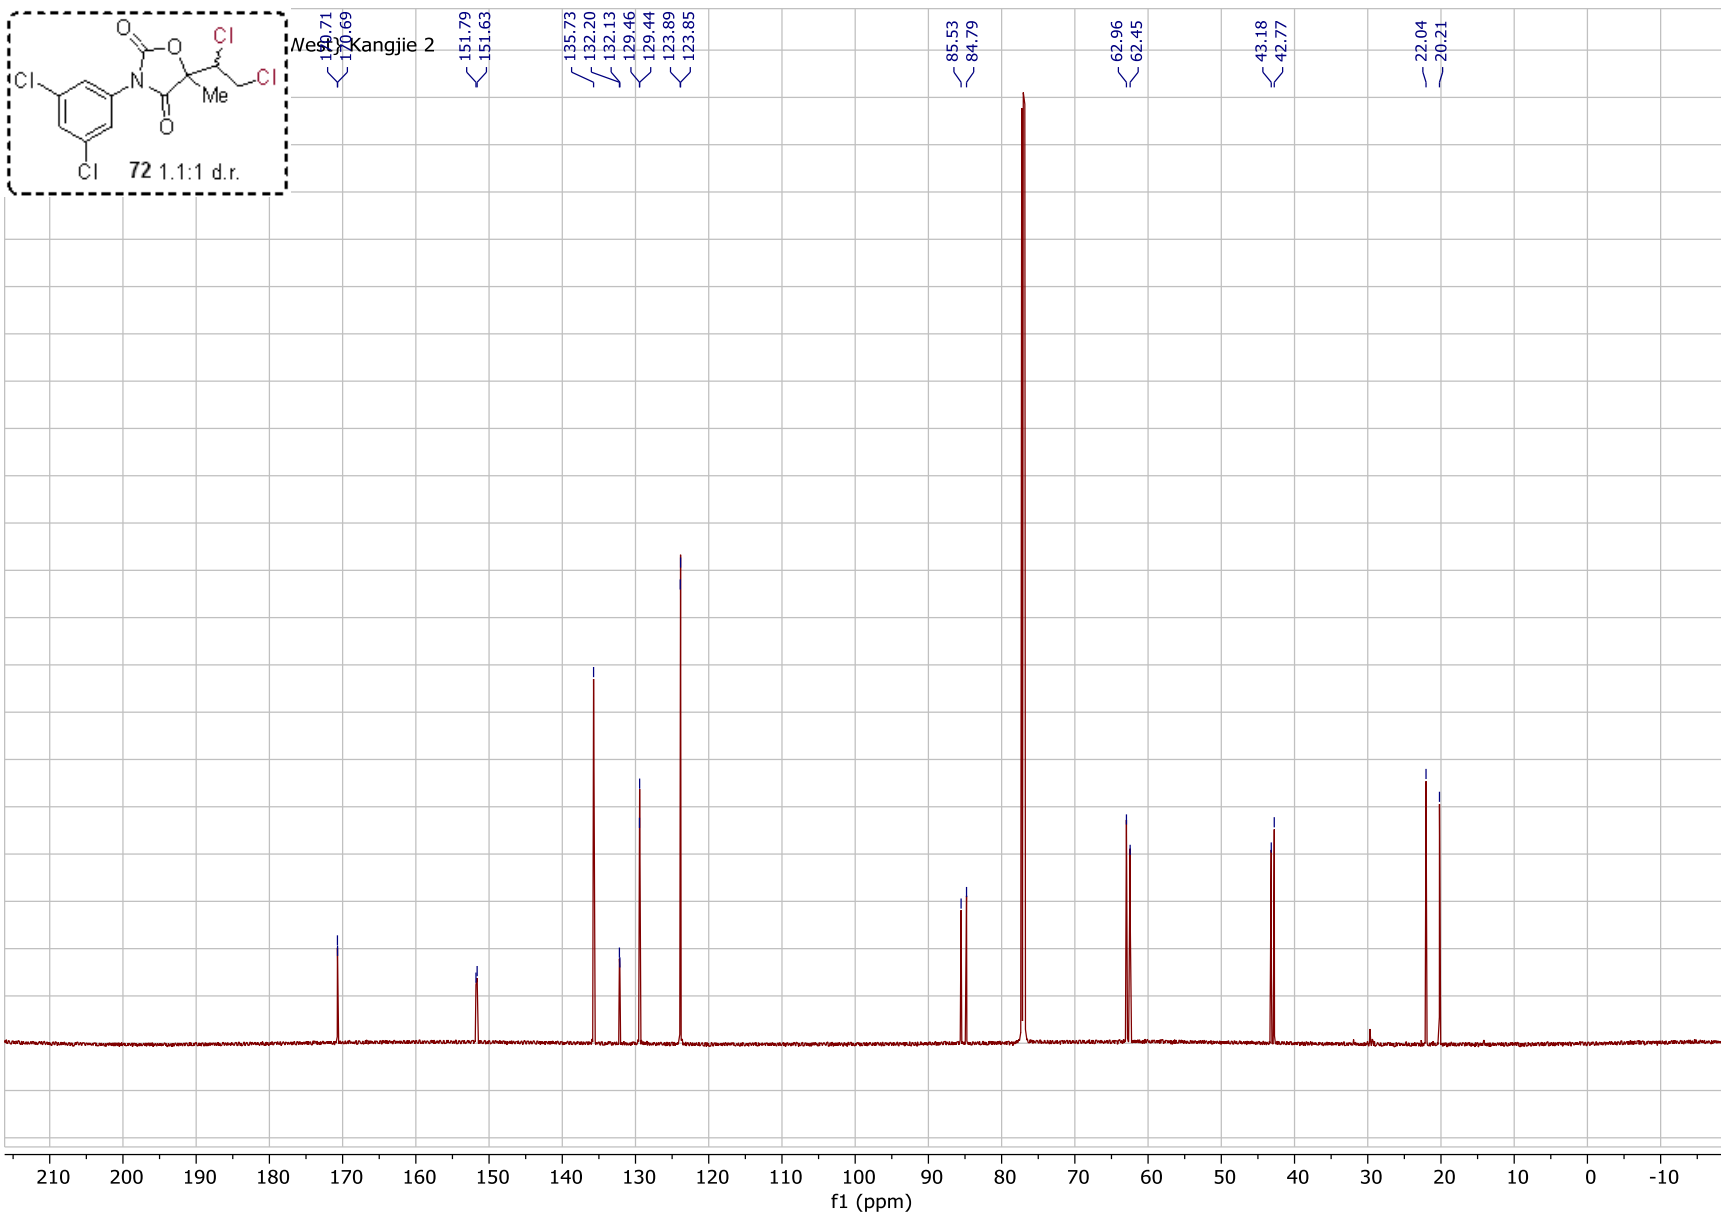

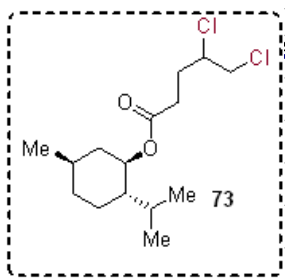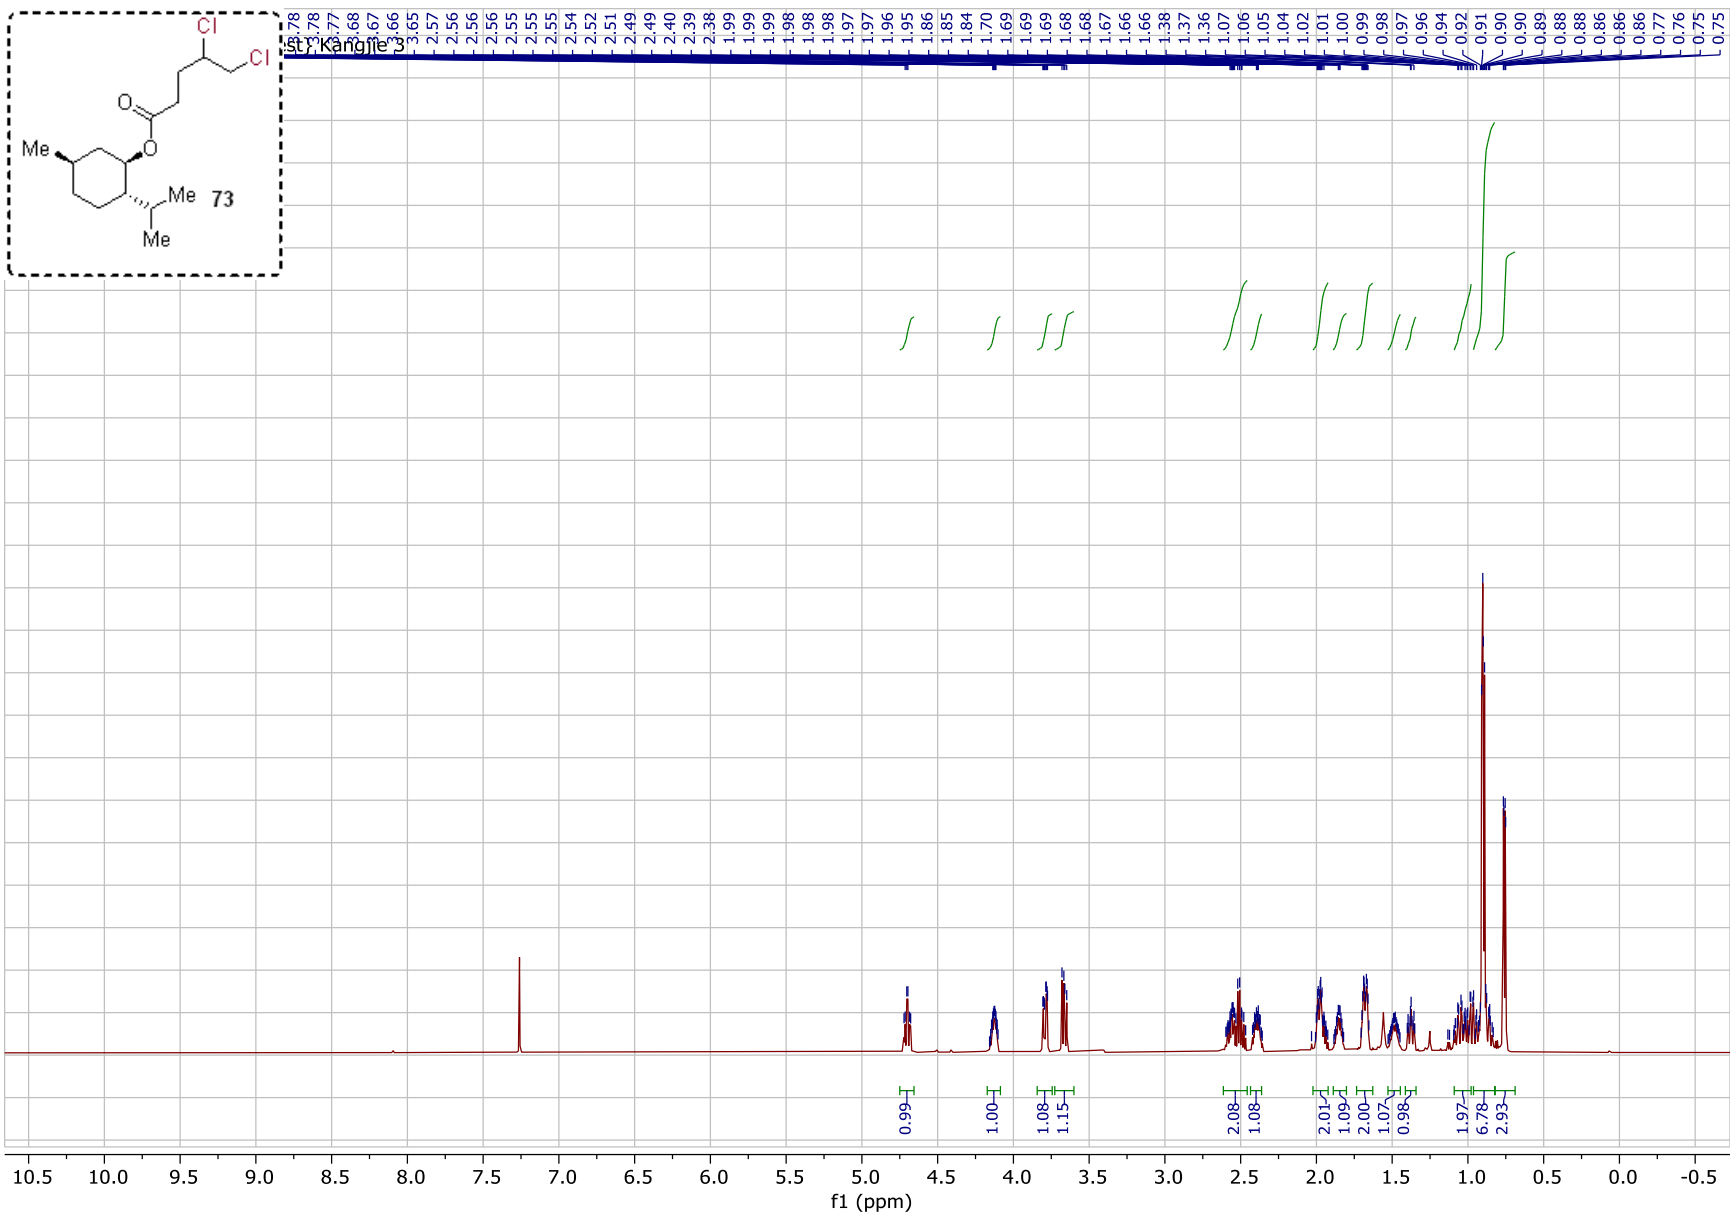

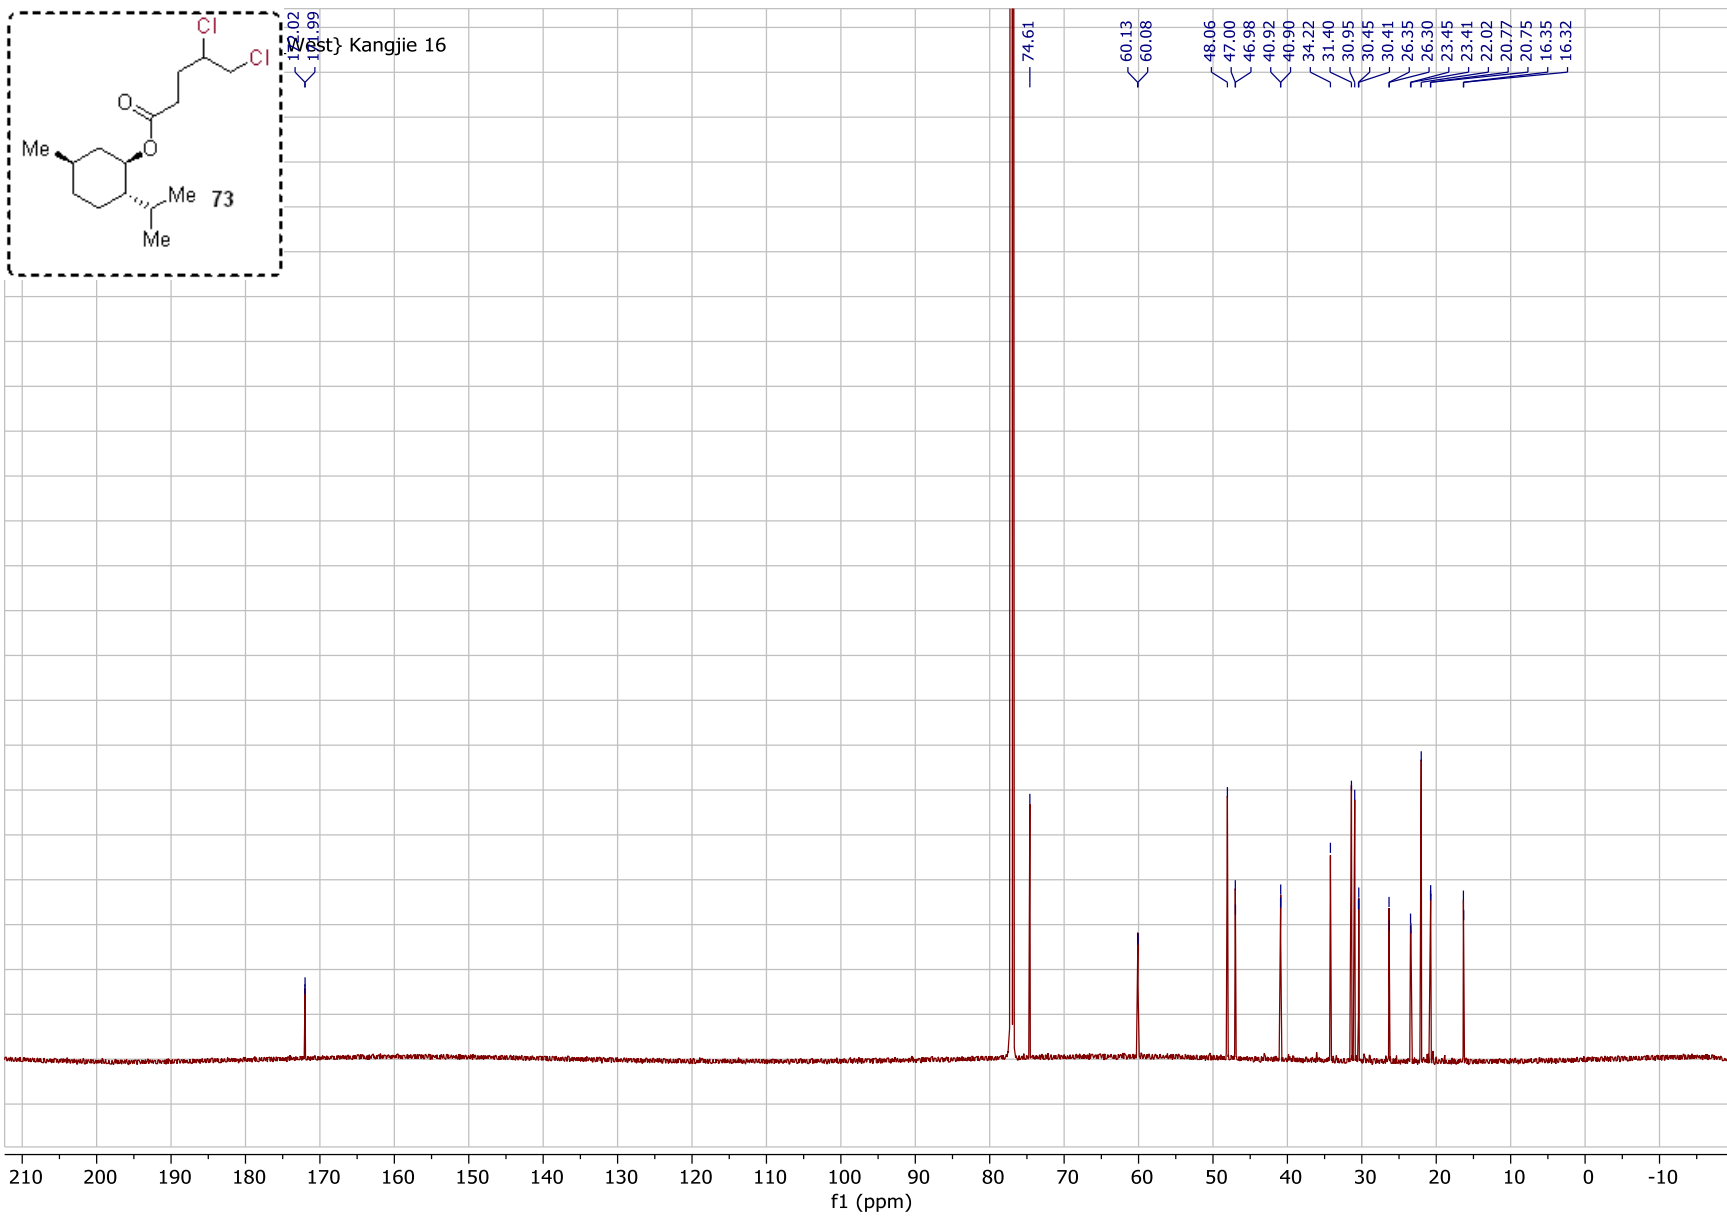



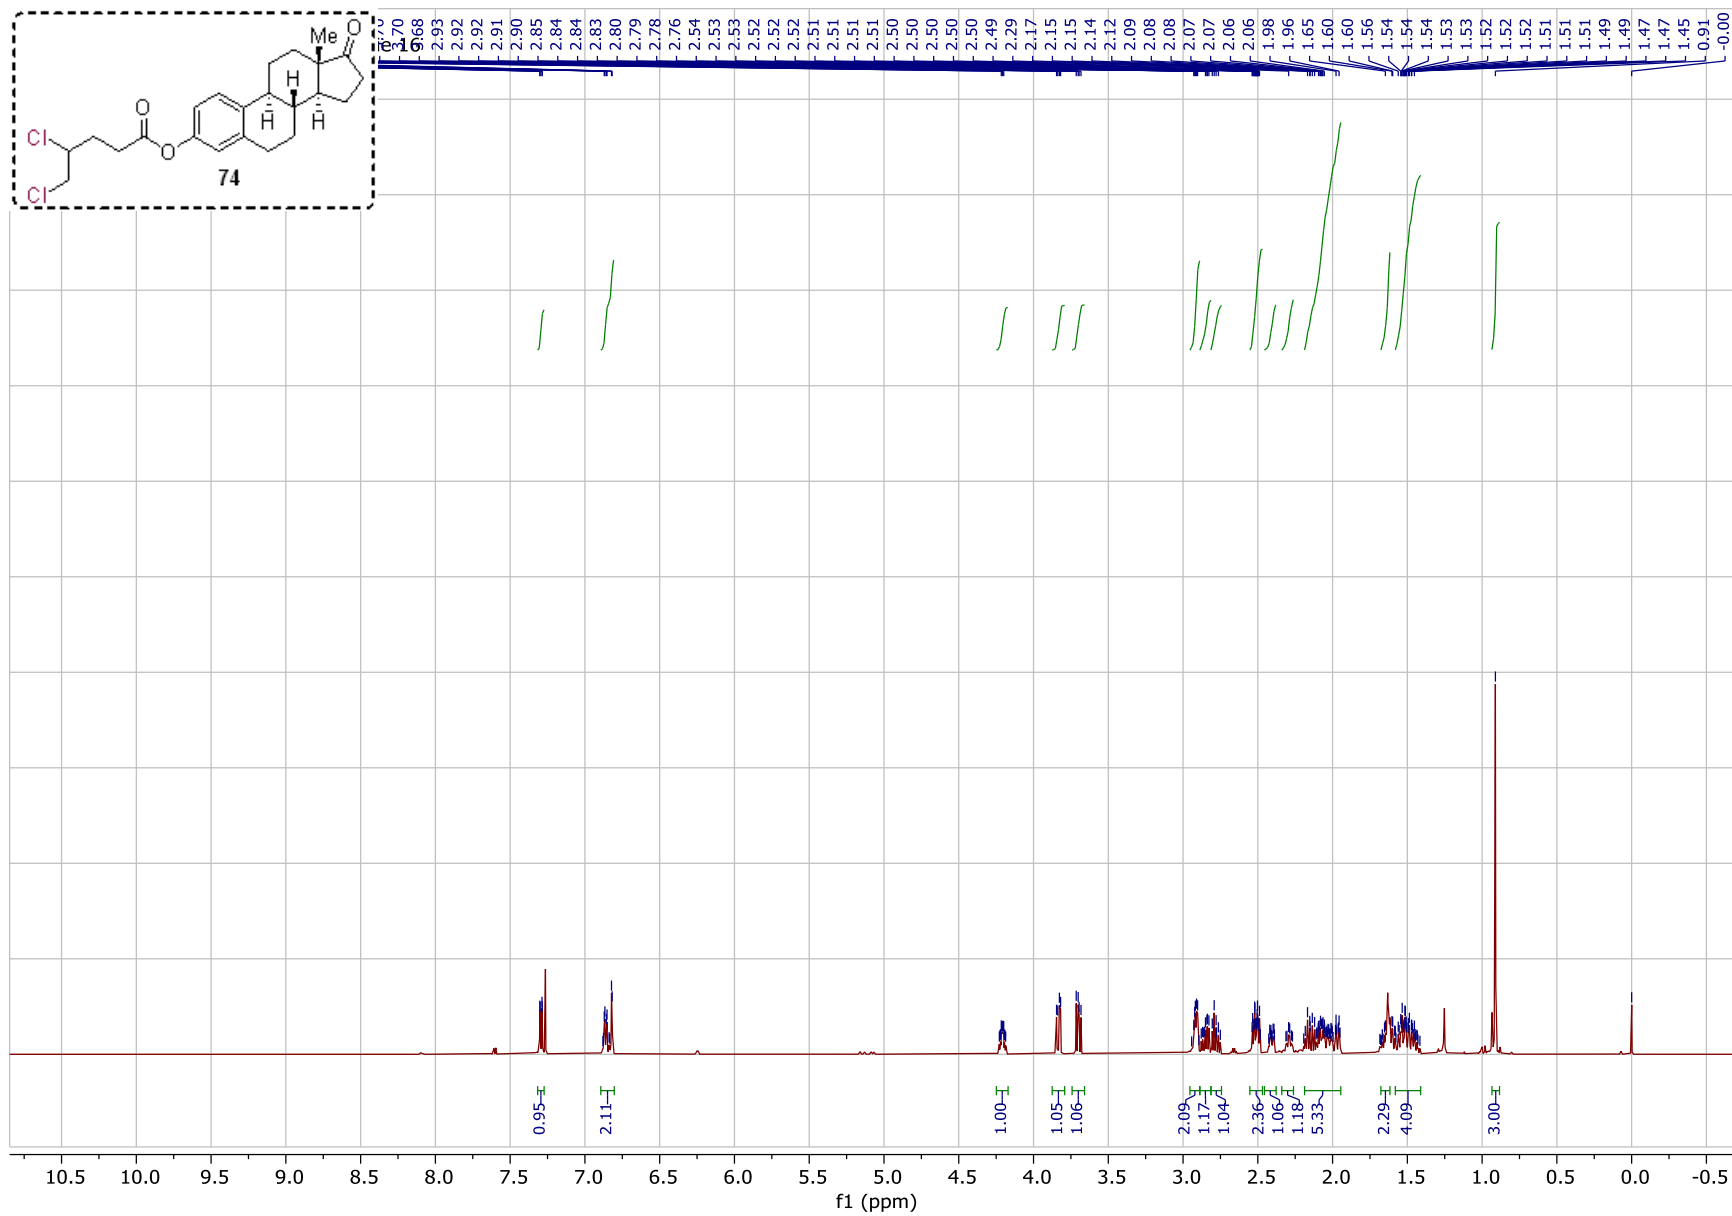

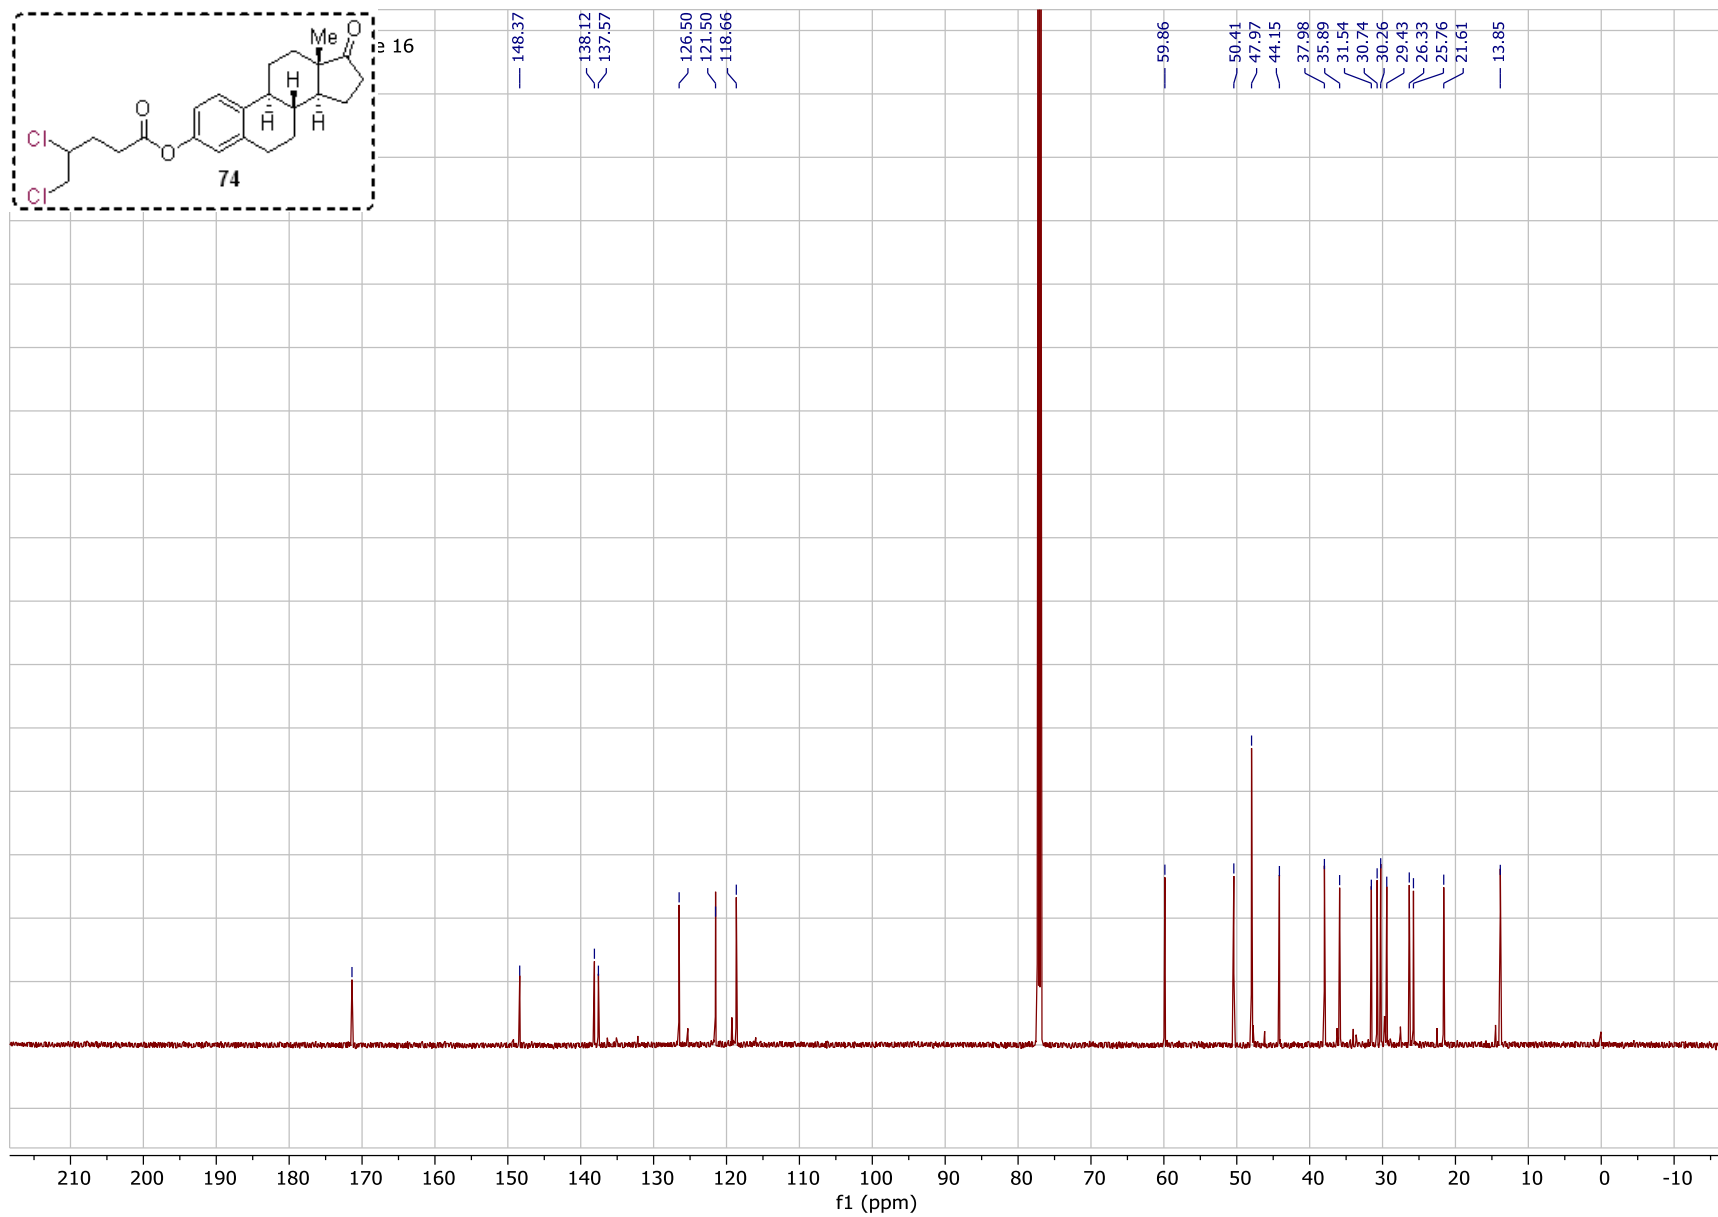

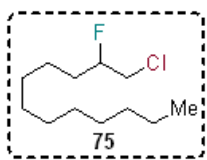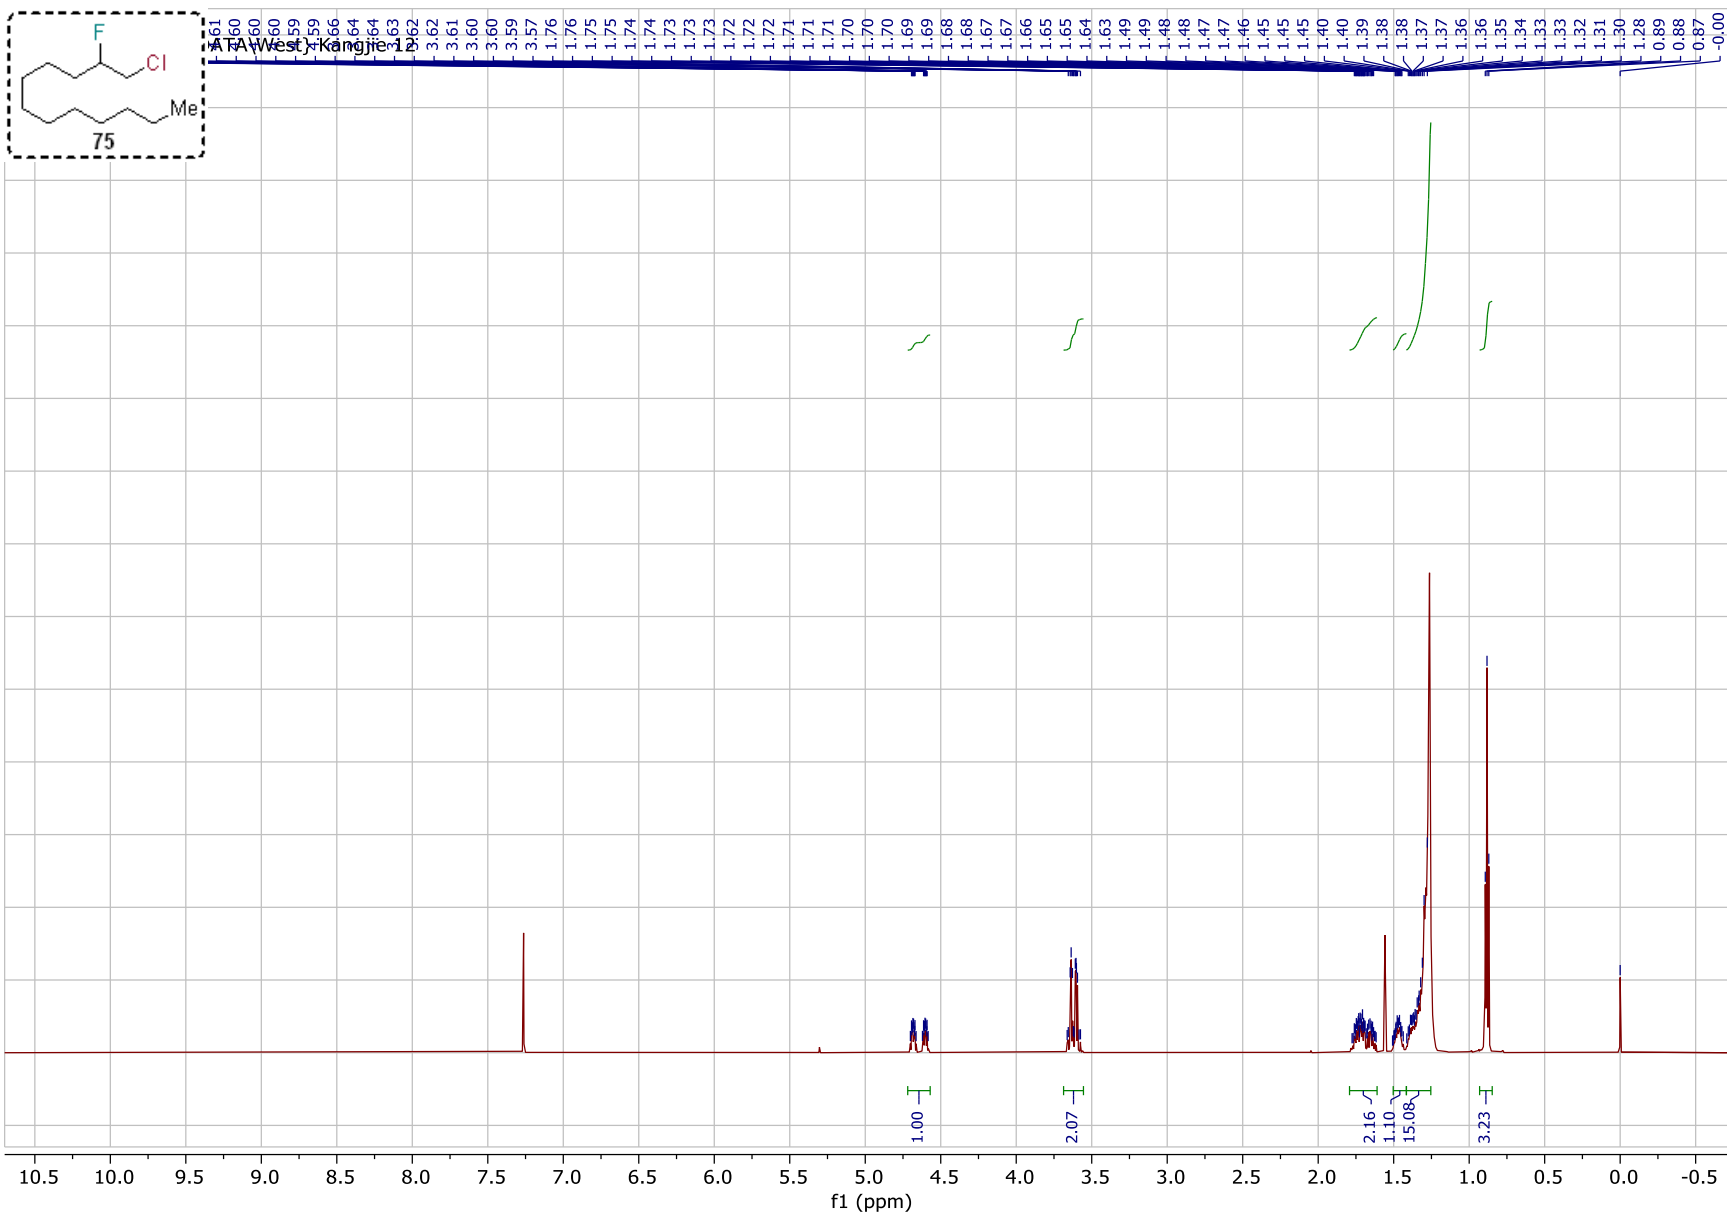

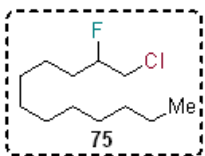

ATA\West\ Kangjie 12

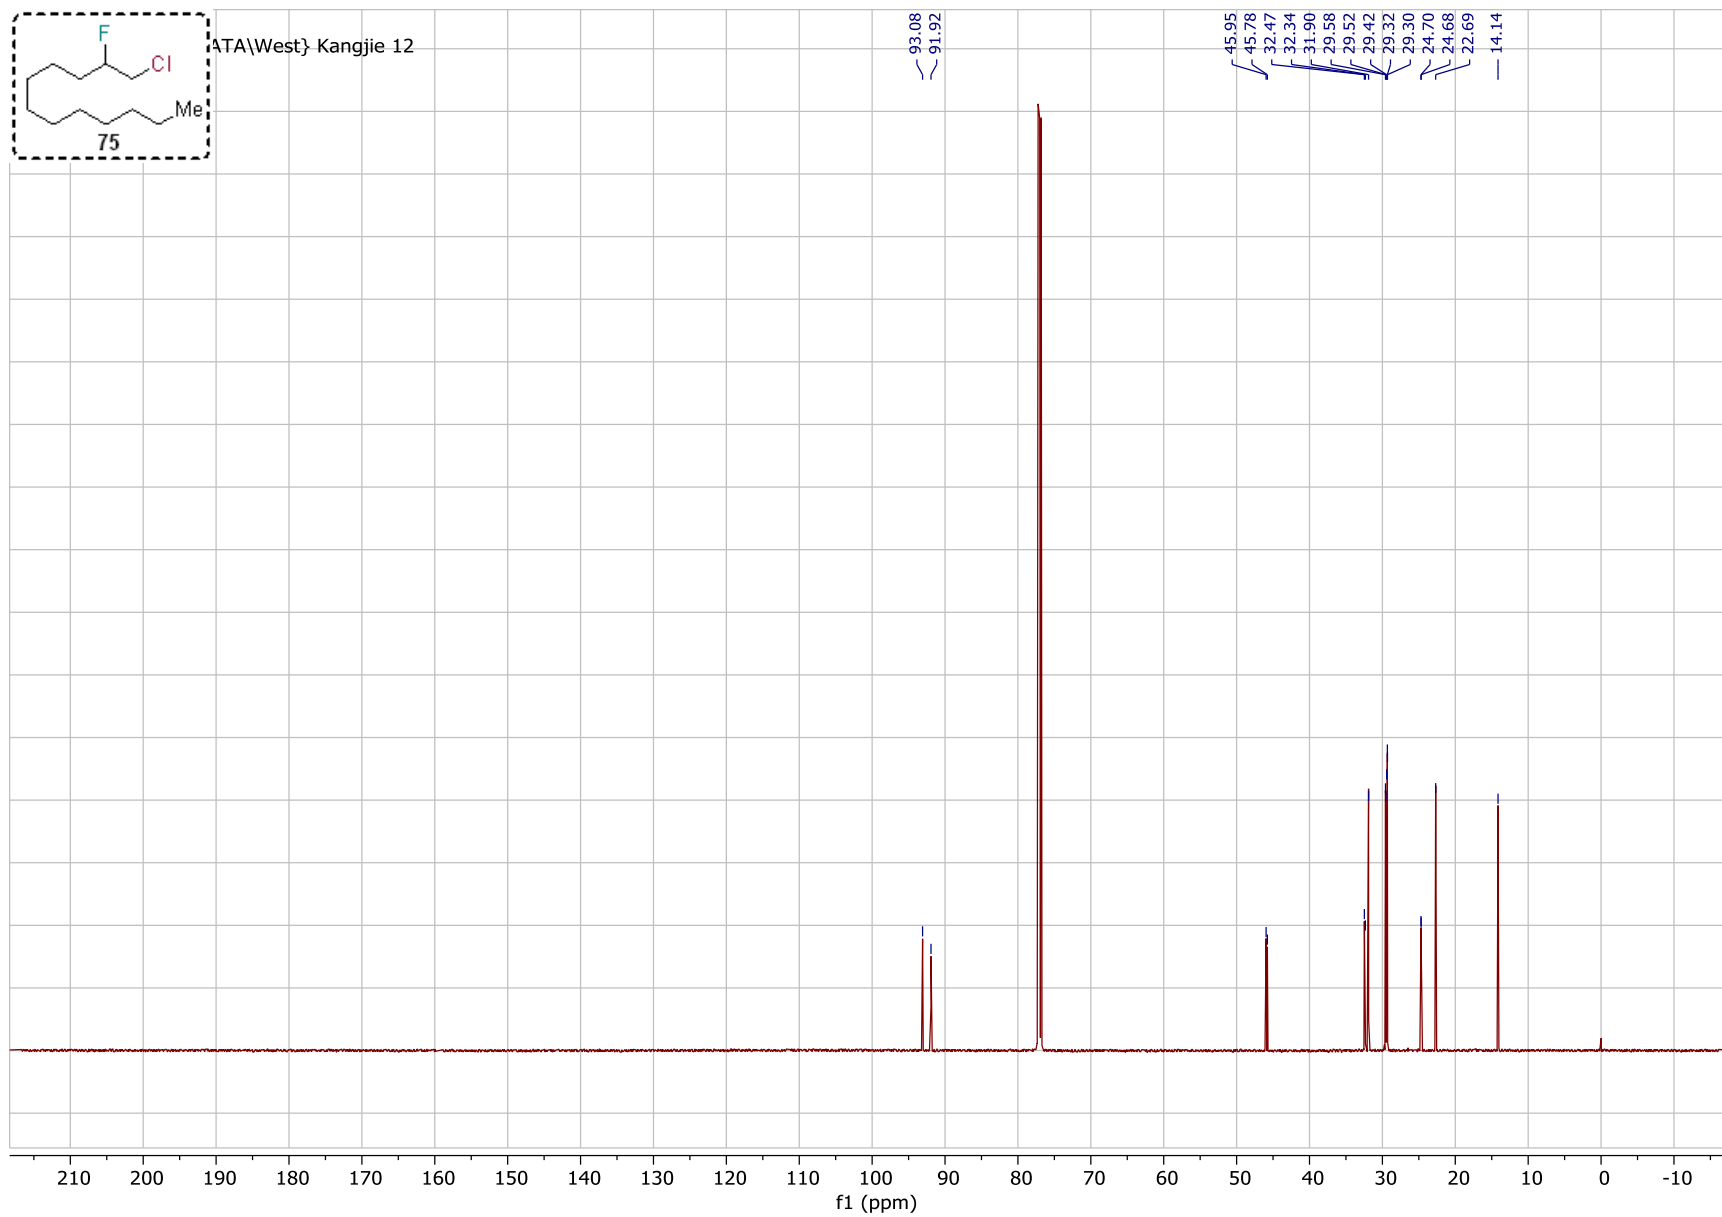

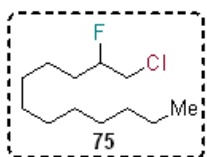

1D  
CDCl3 {D:\DATA\West} Kangjie 12

-181.76  
-181.79  
-181.80  
-181.81  
-181.83  
-181.83  
-181.84  
-181.85  
-181.86  
-181.88  
-181.90  
-181.91  
-181.92  
-181.93  
-181.93  
-181.95  
-181.96  
-181.97  
-182.00

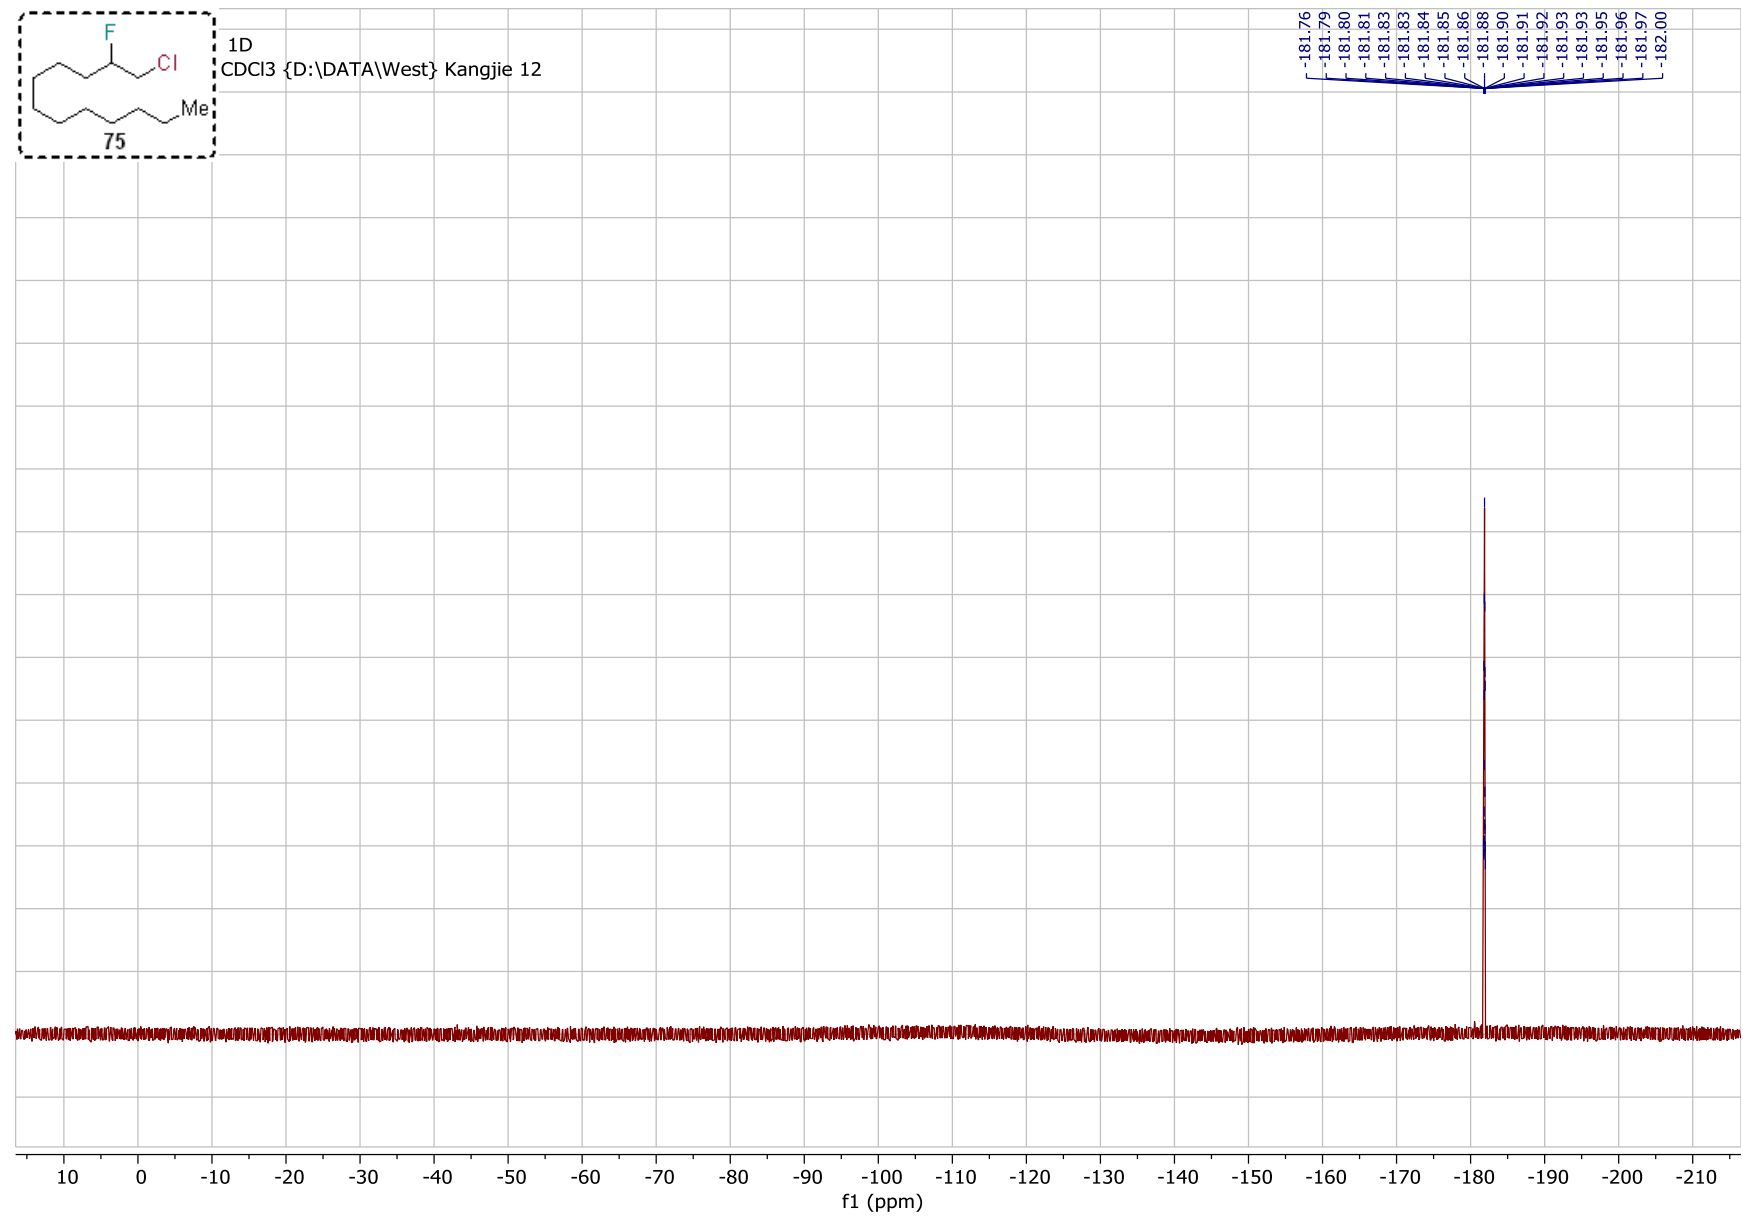

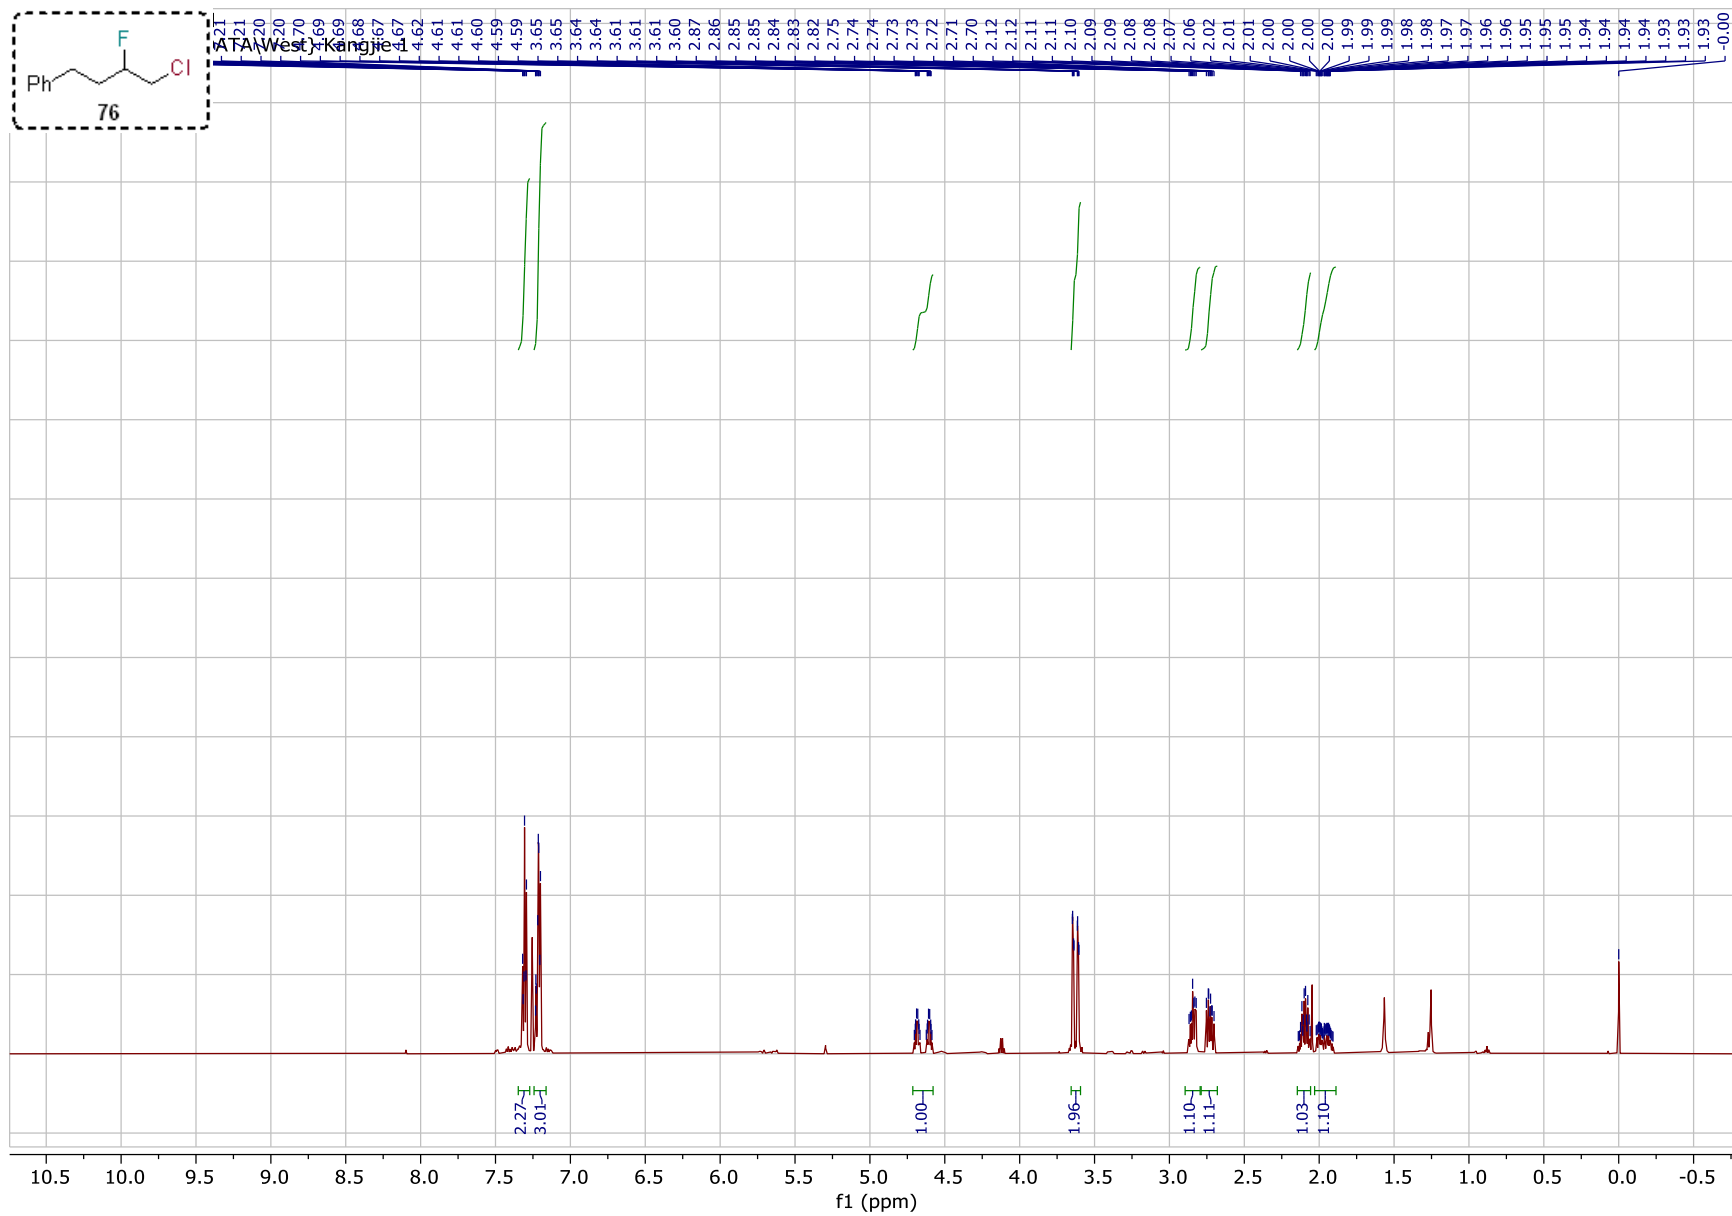

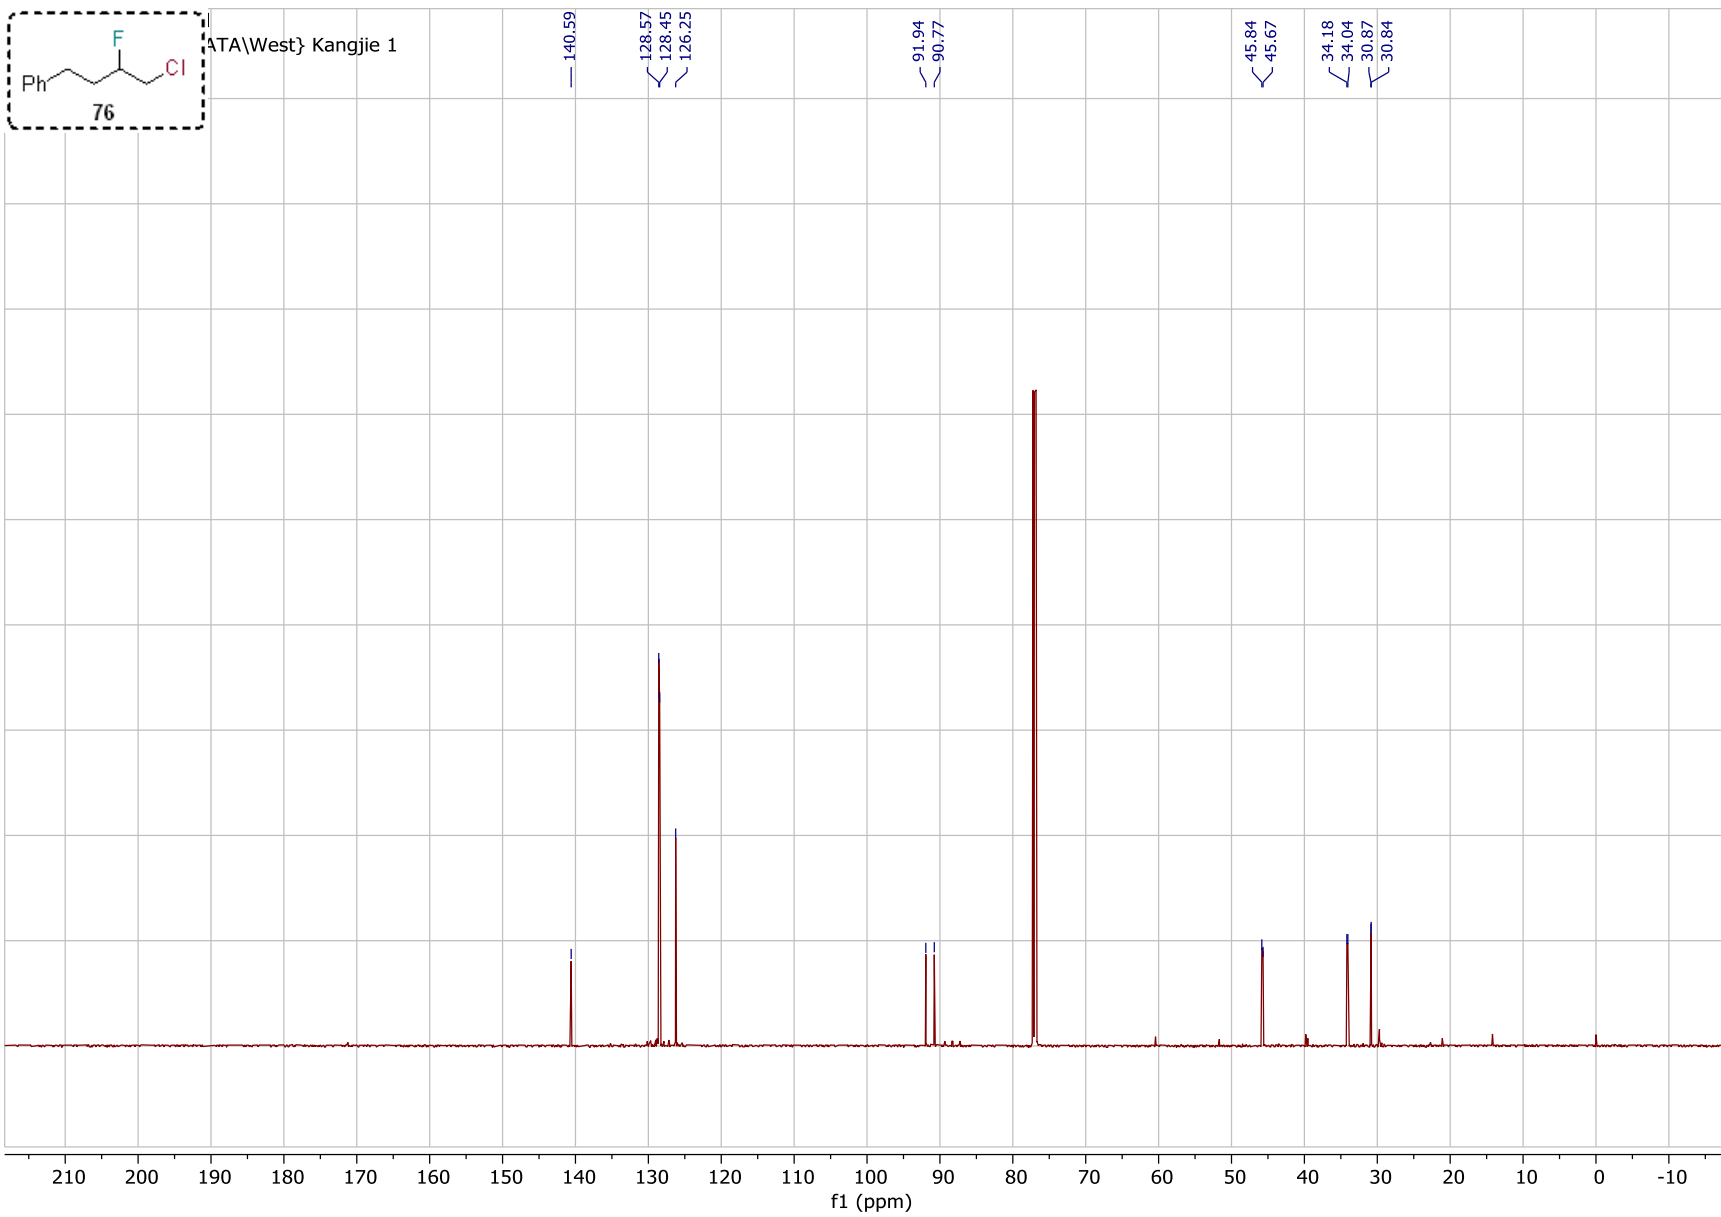

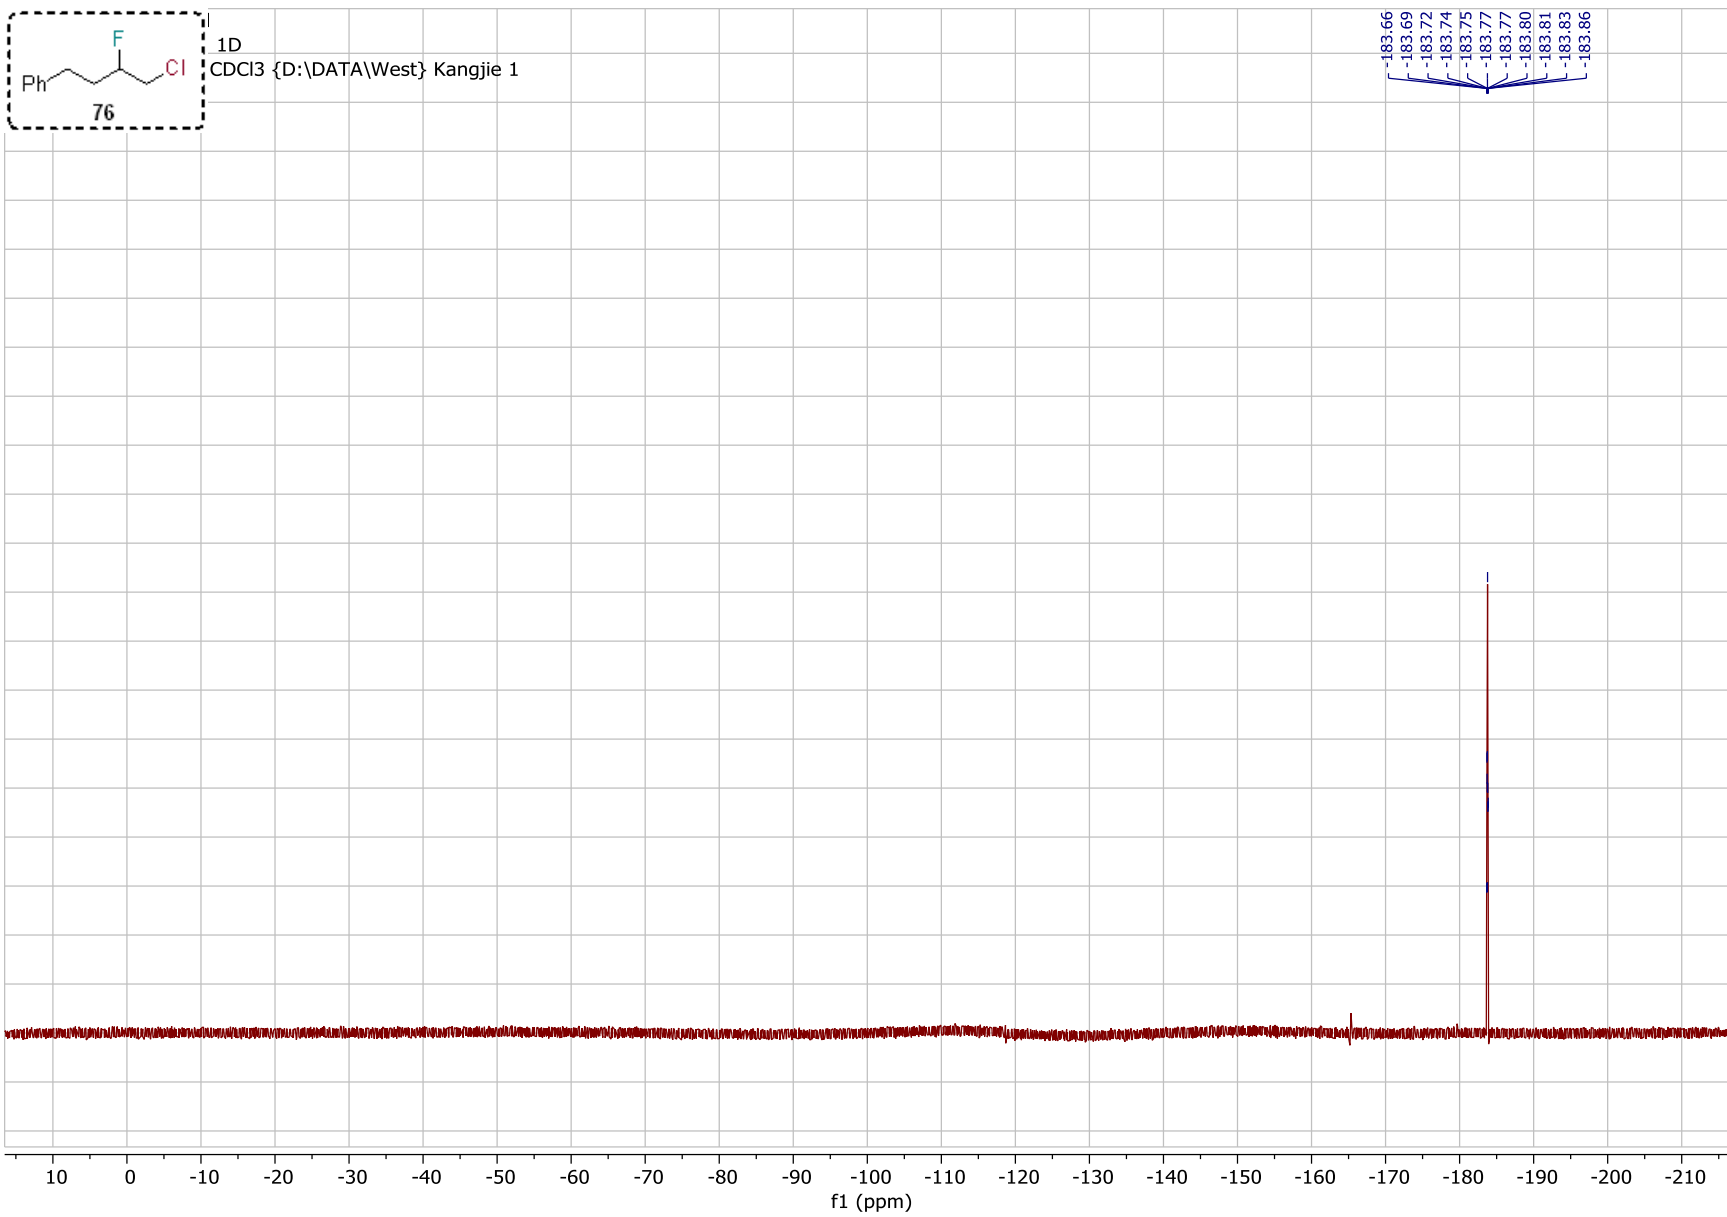



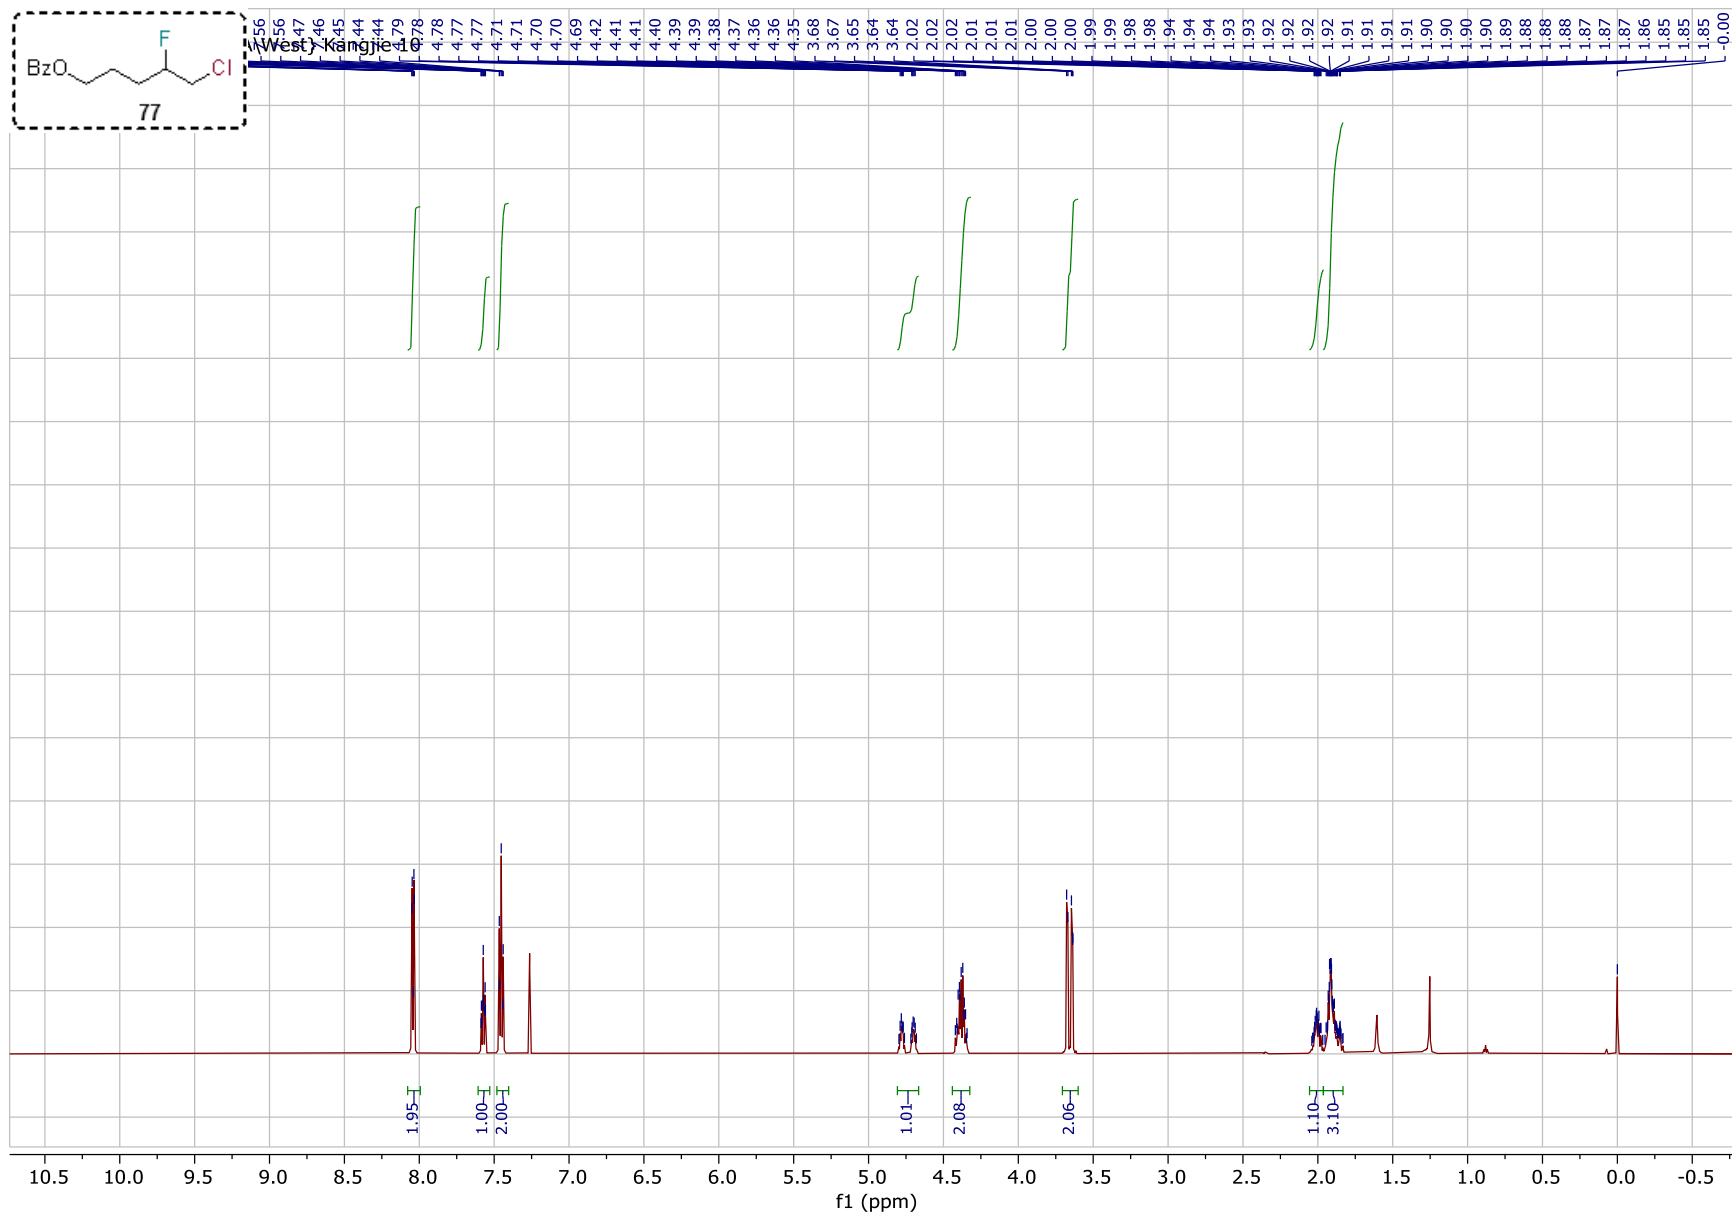

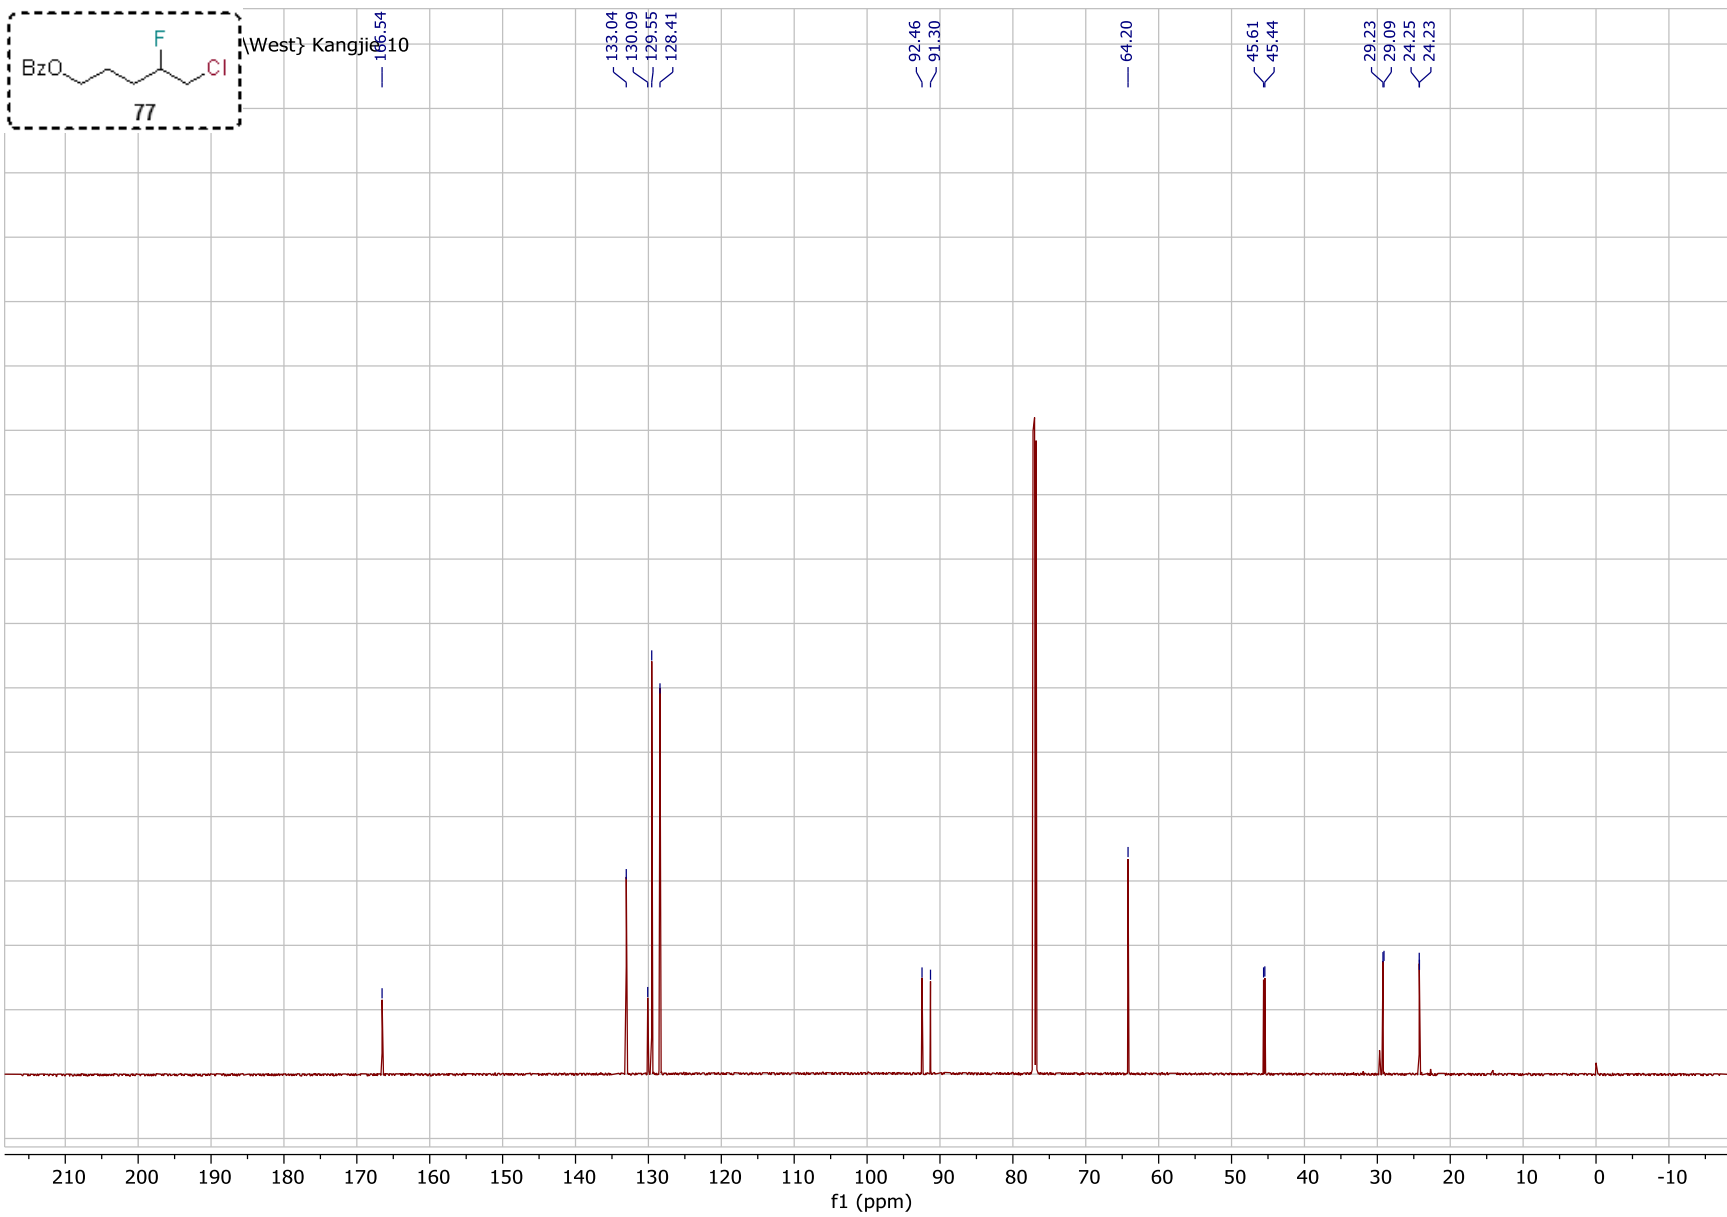

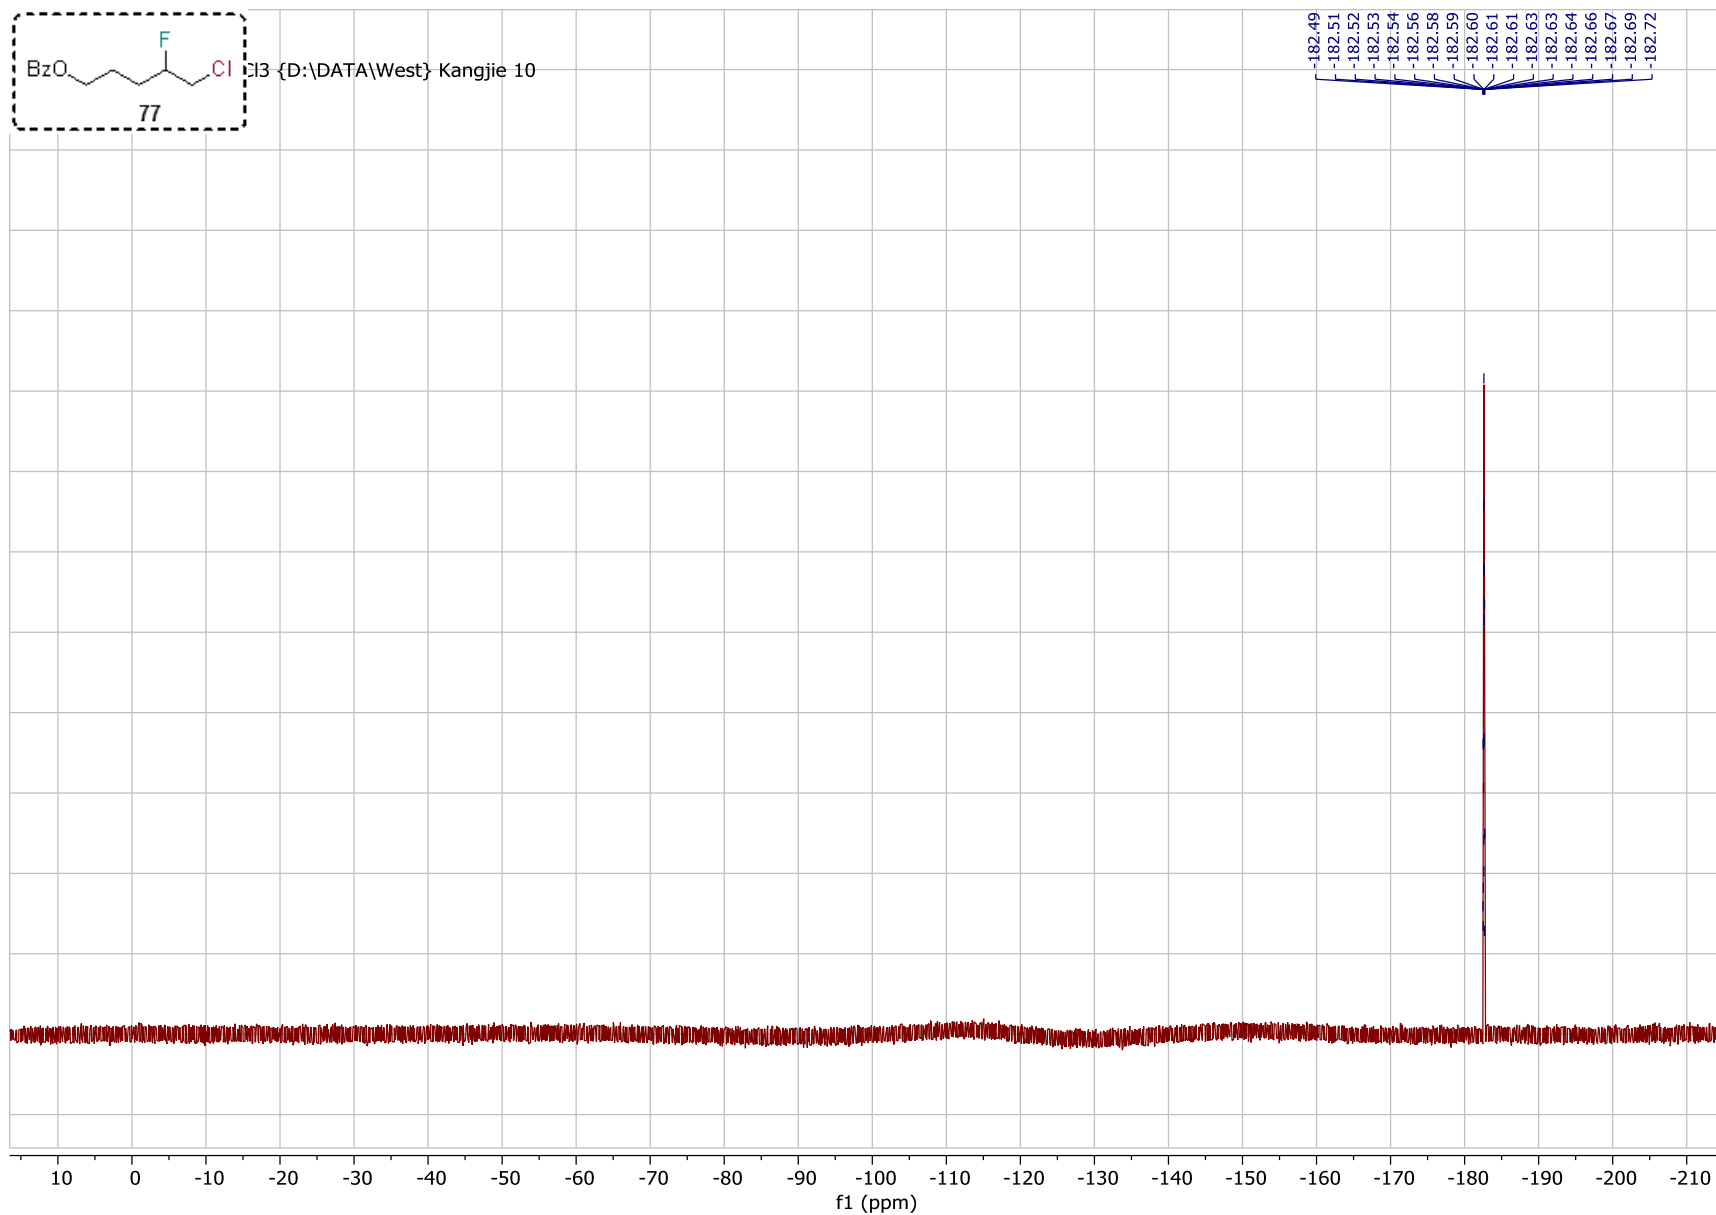

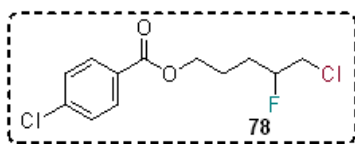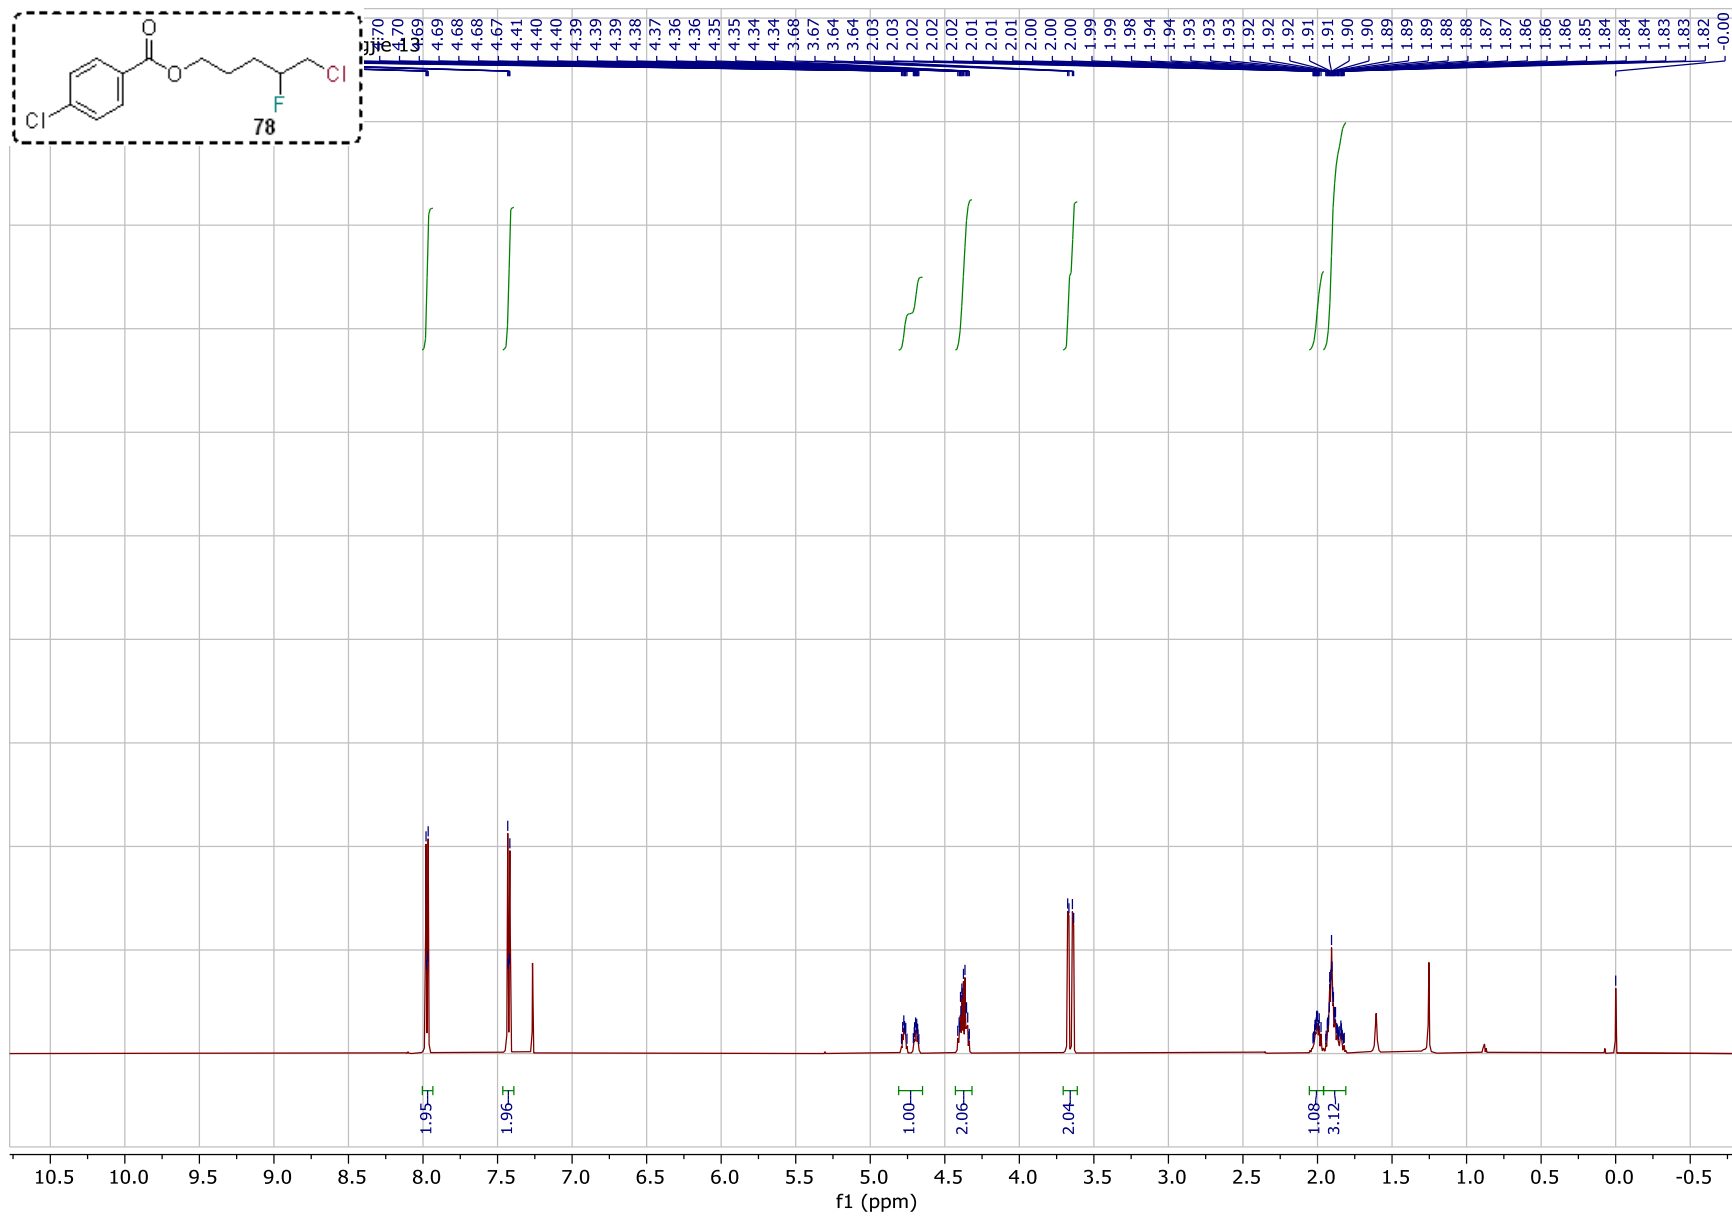

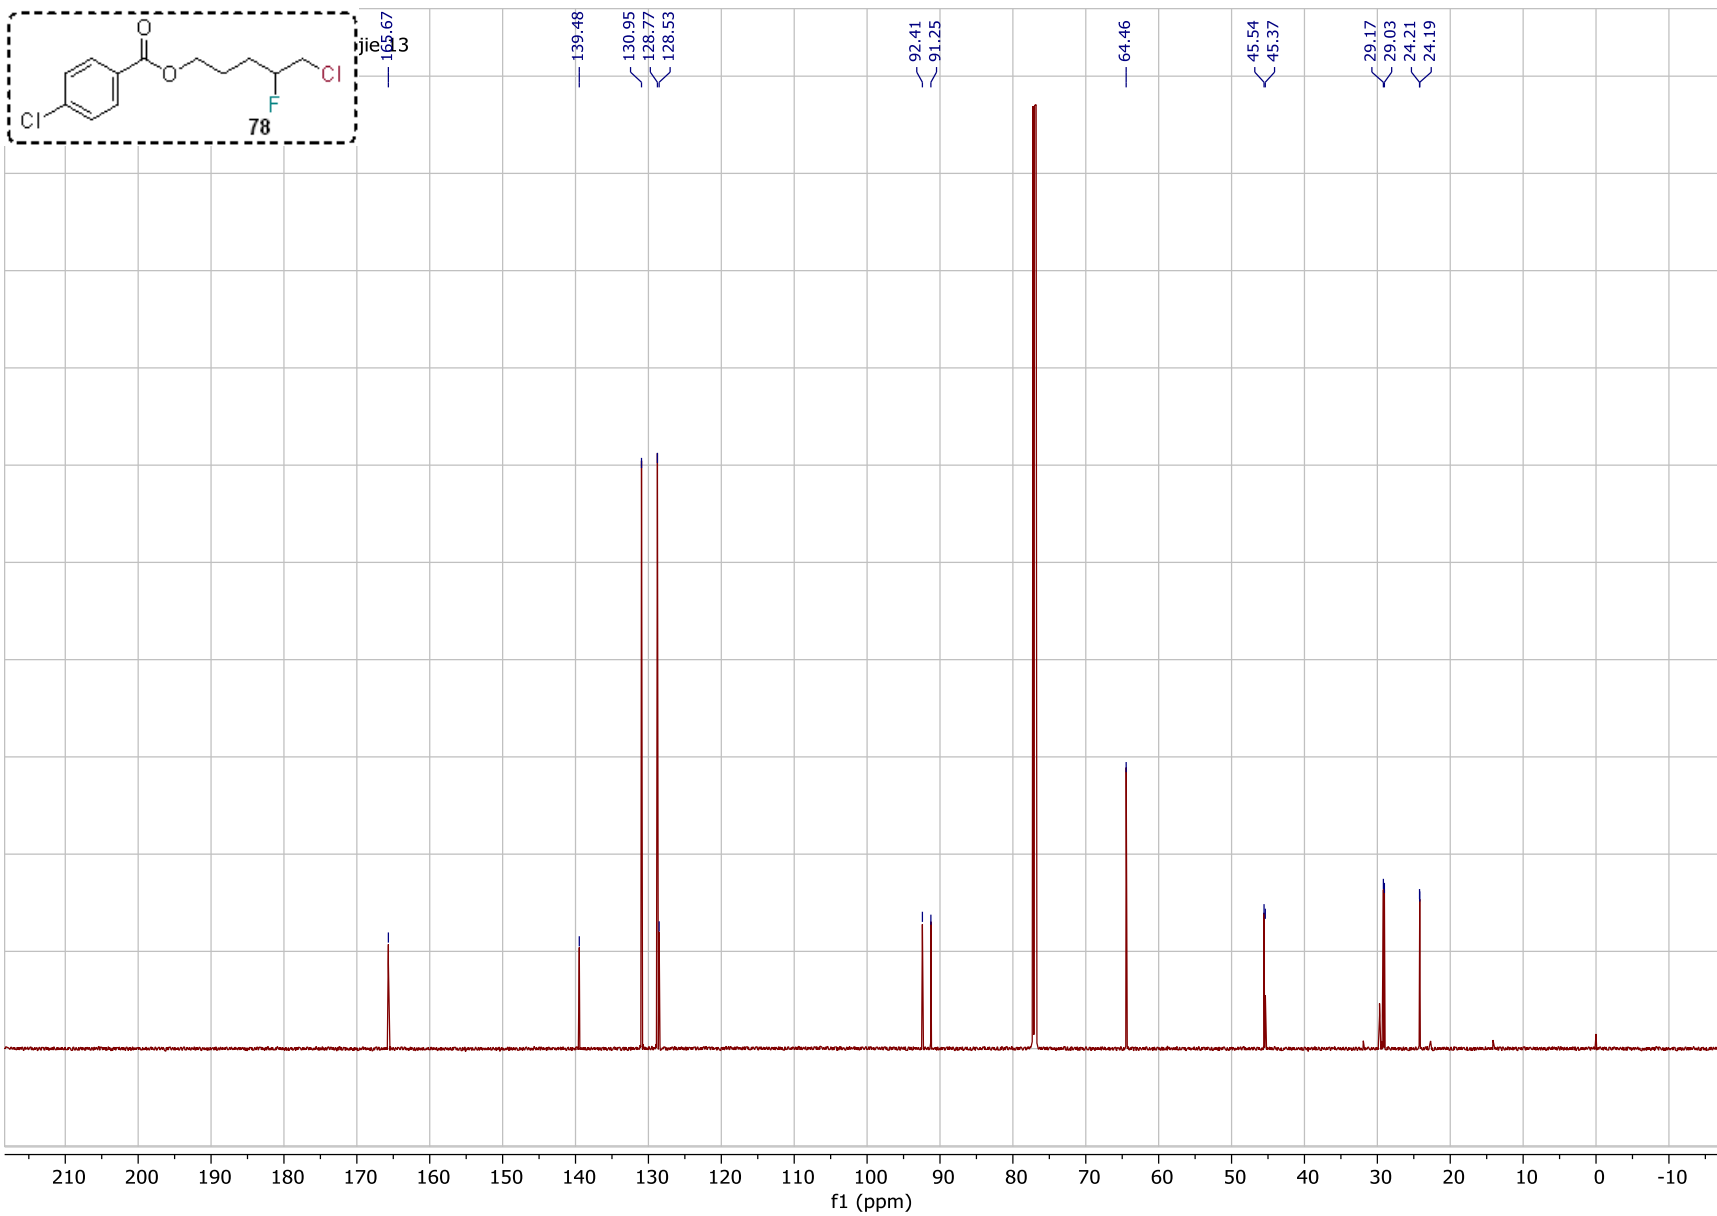

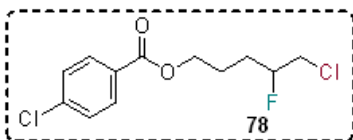

West Kangjie 13

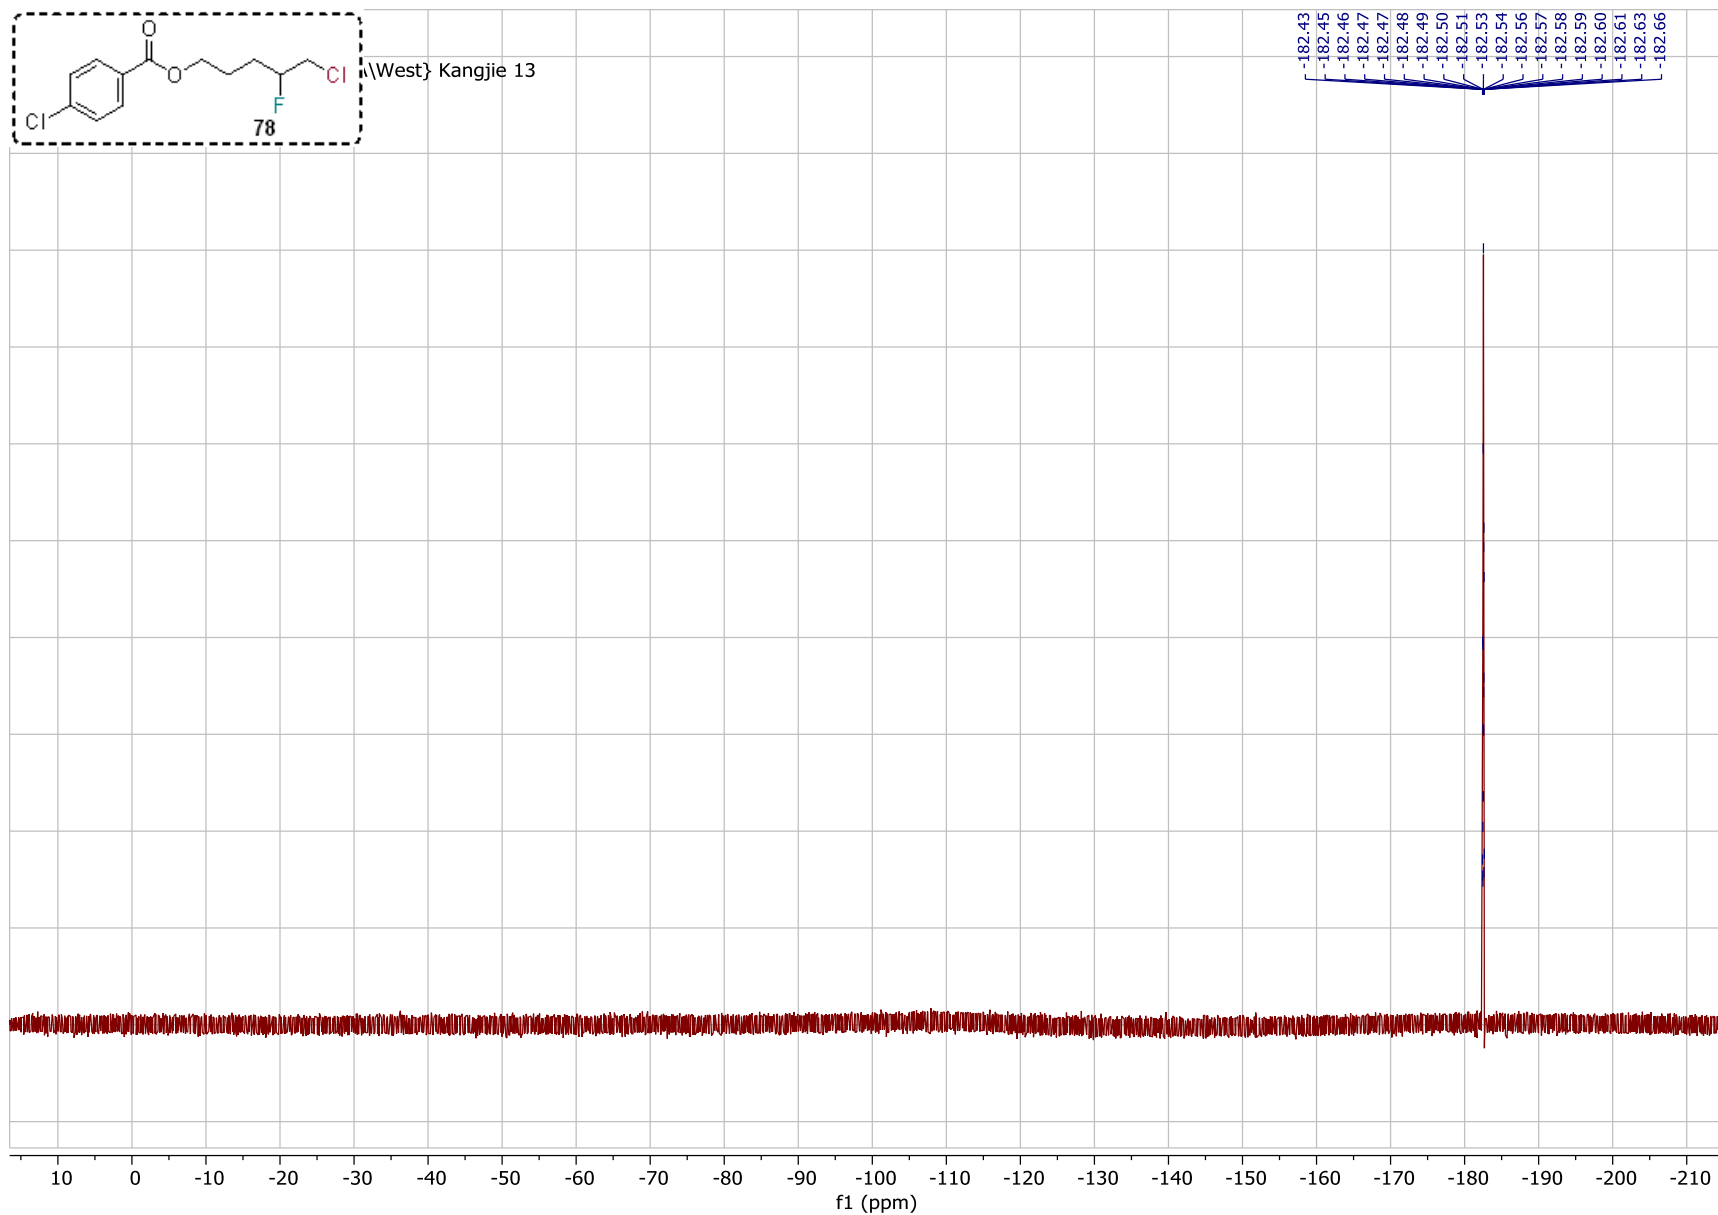

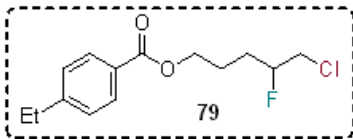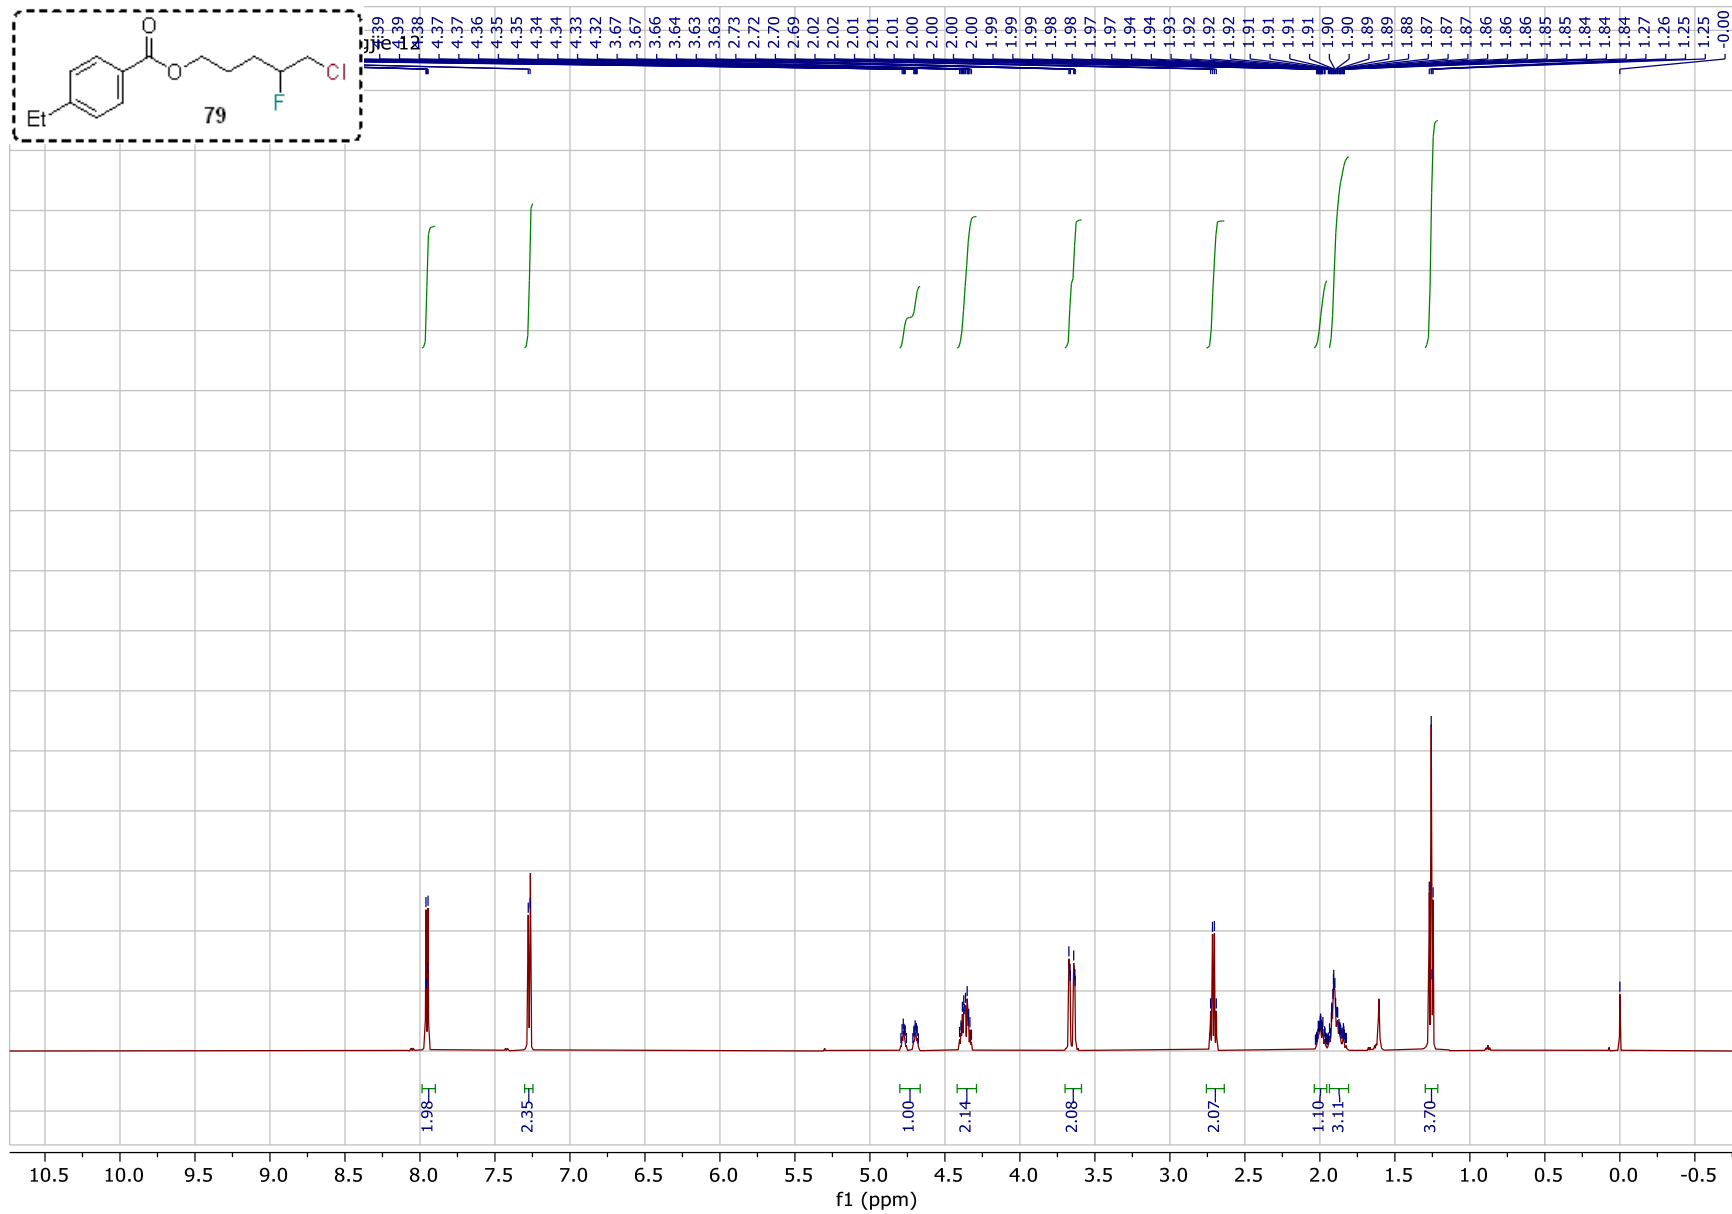

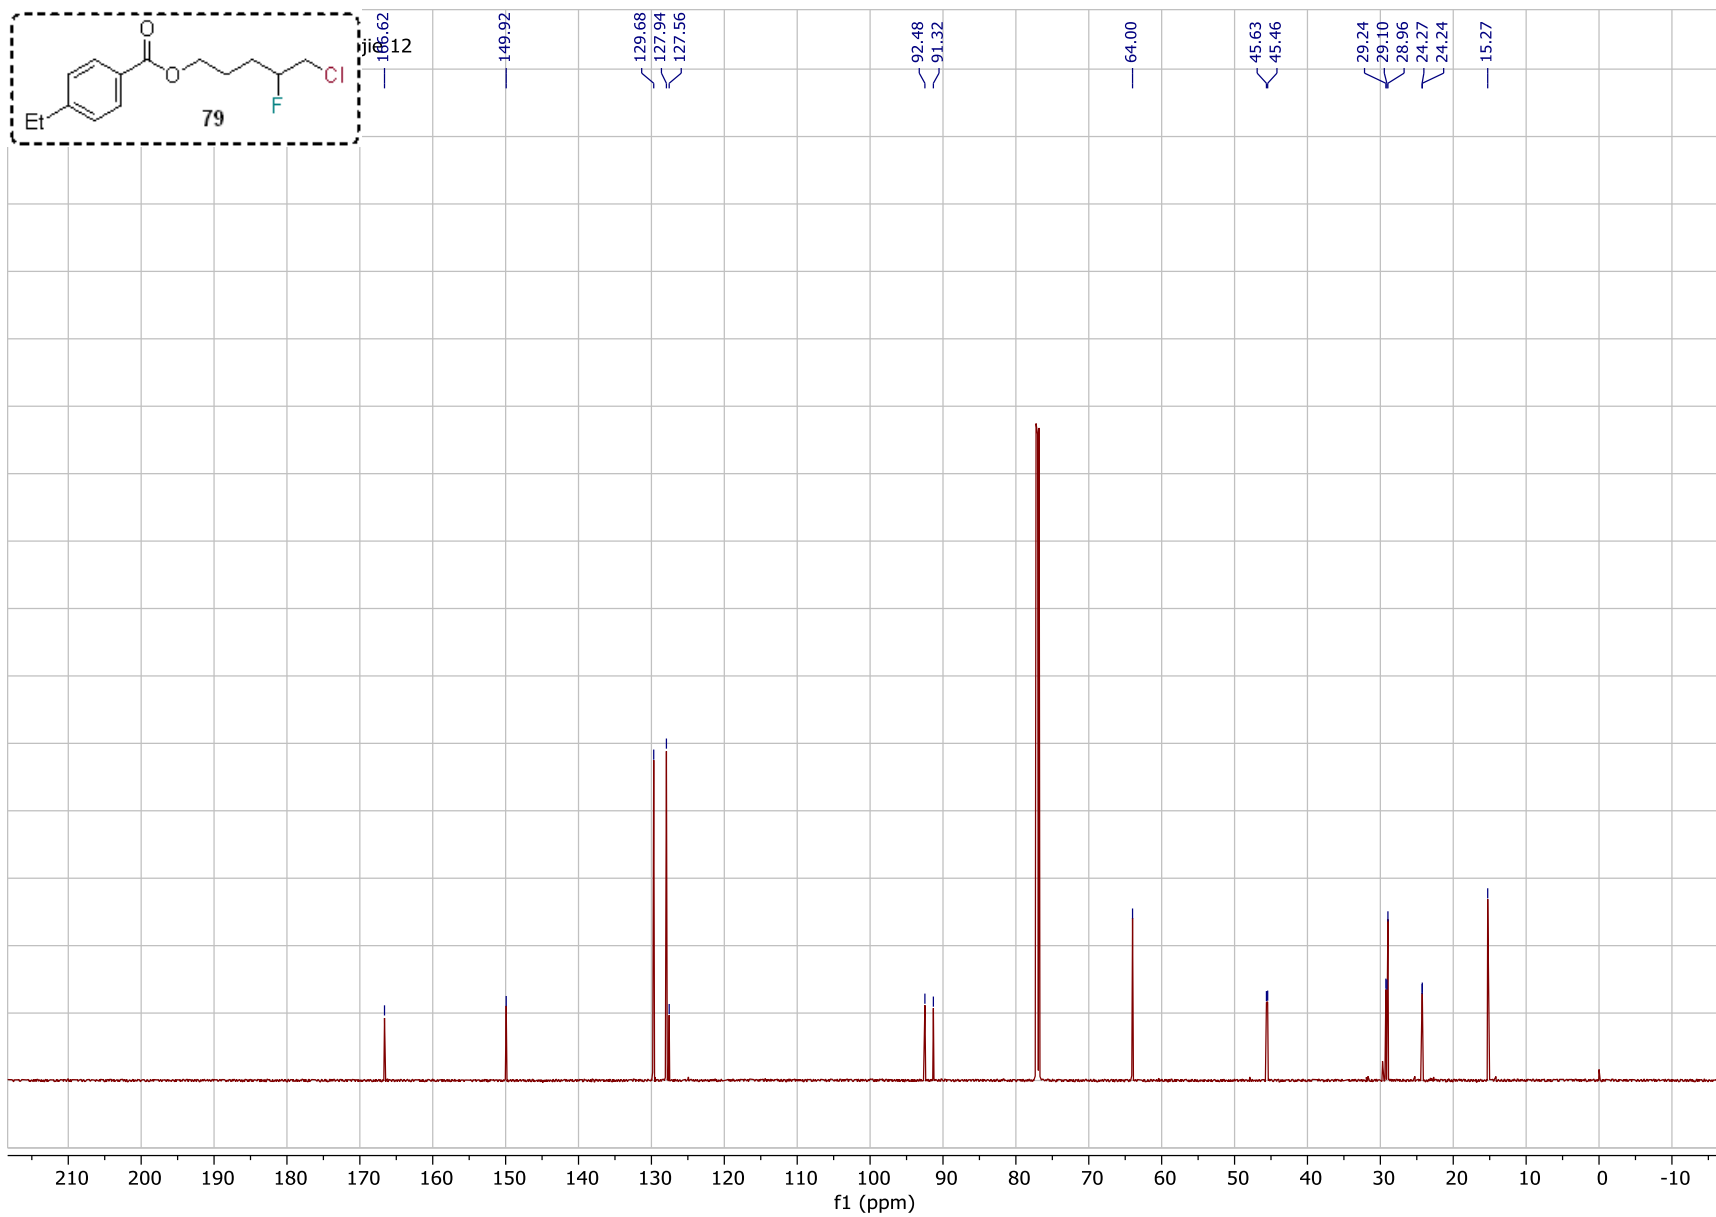



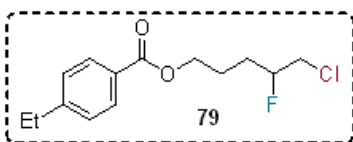

West Kangjie 12

-182.50  
-182.52  
-182.53  
-182.55  
-182.57  
-182.59  
-182.60  
-182.62  
-182.64  
-182.64  
-182.65  
-182.67  
-182.69  
-182.70  
-182.73

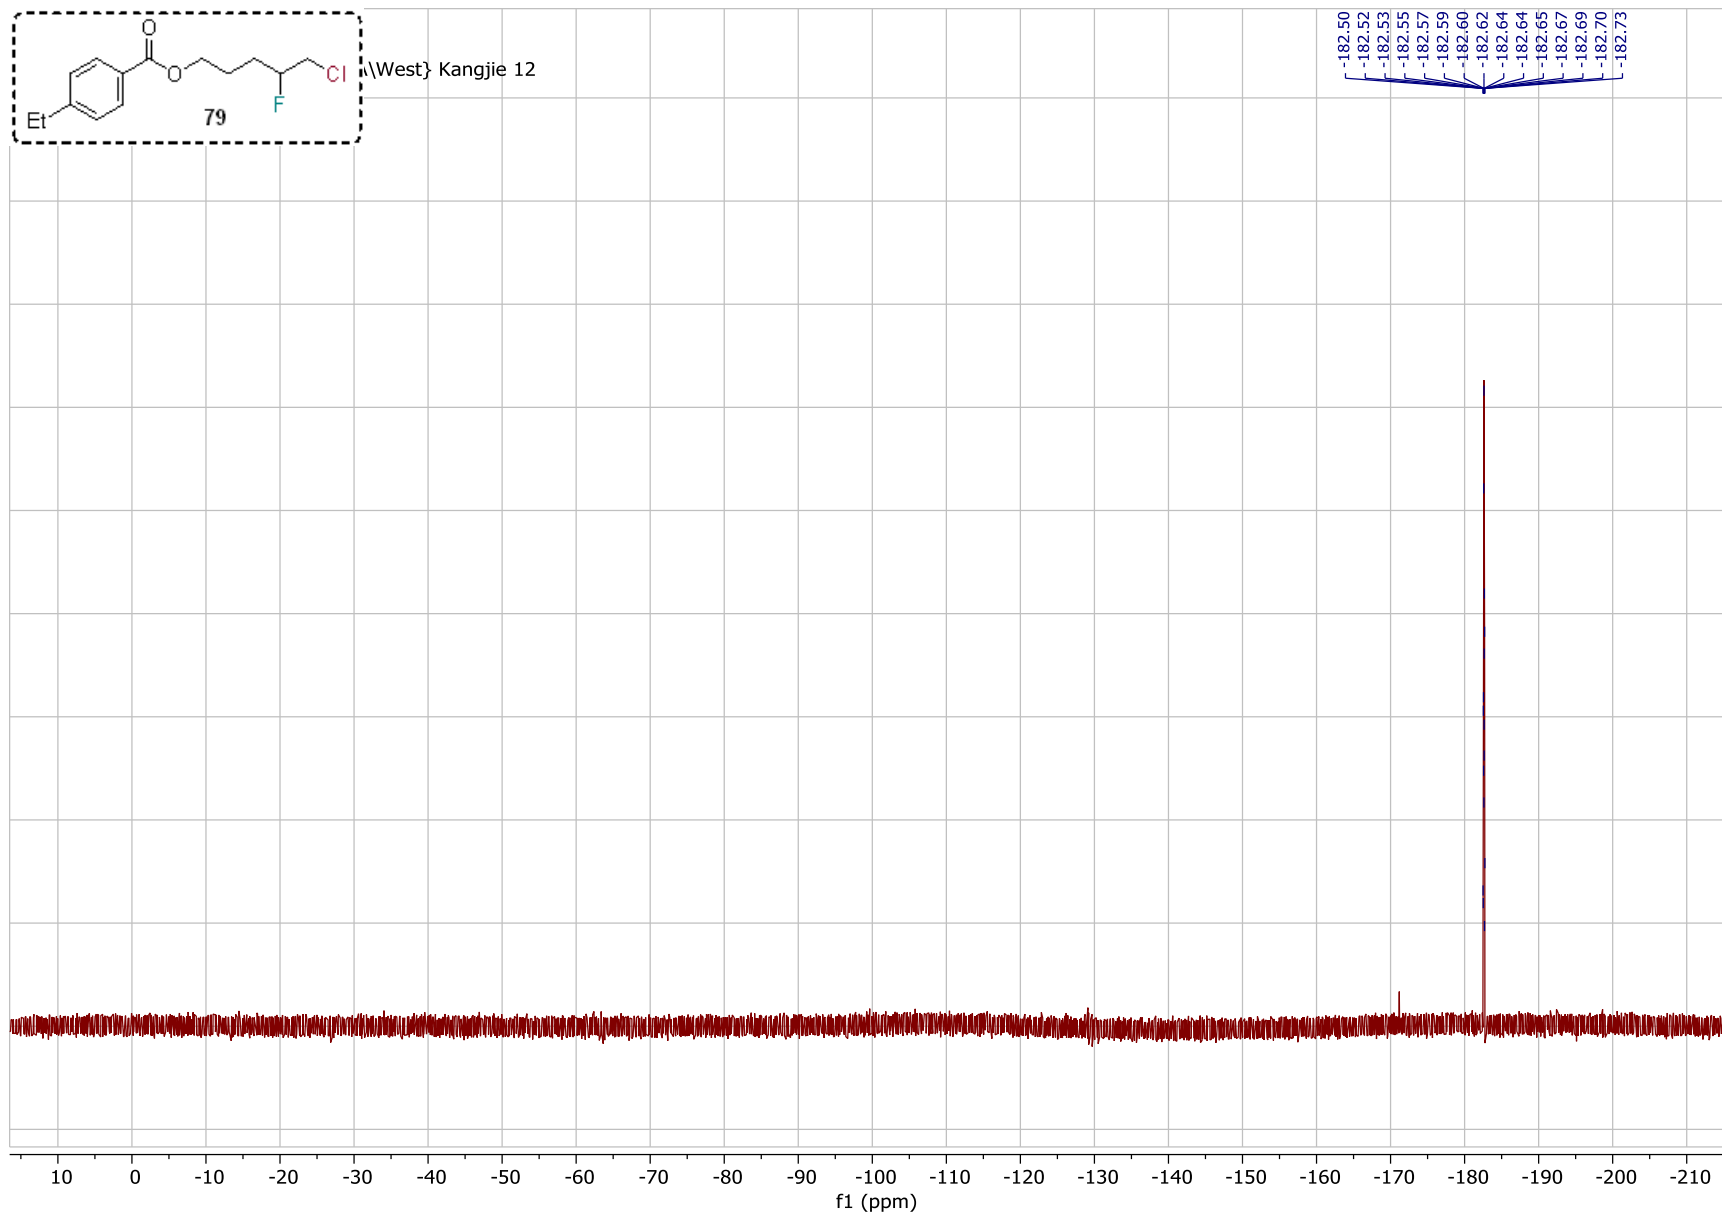

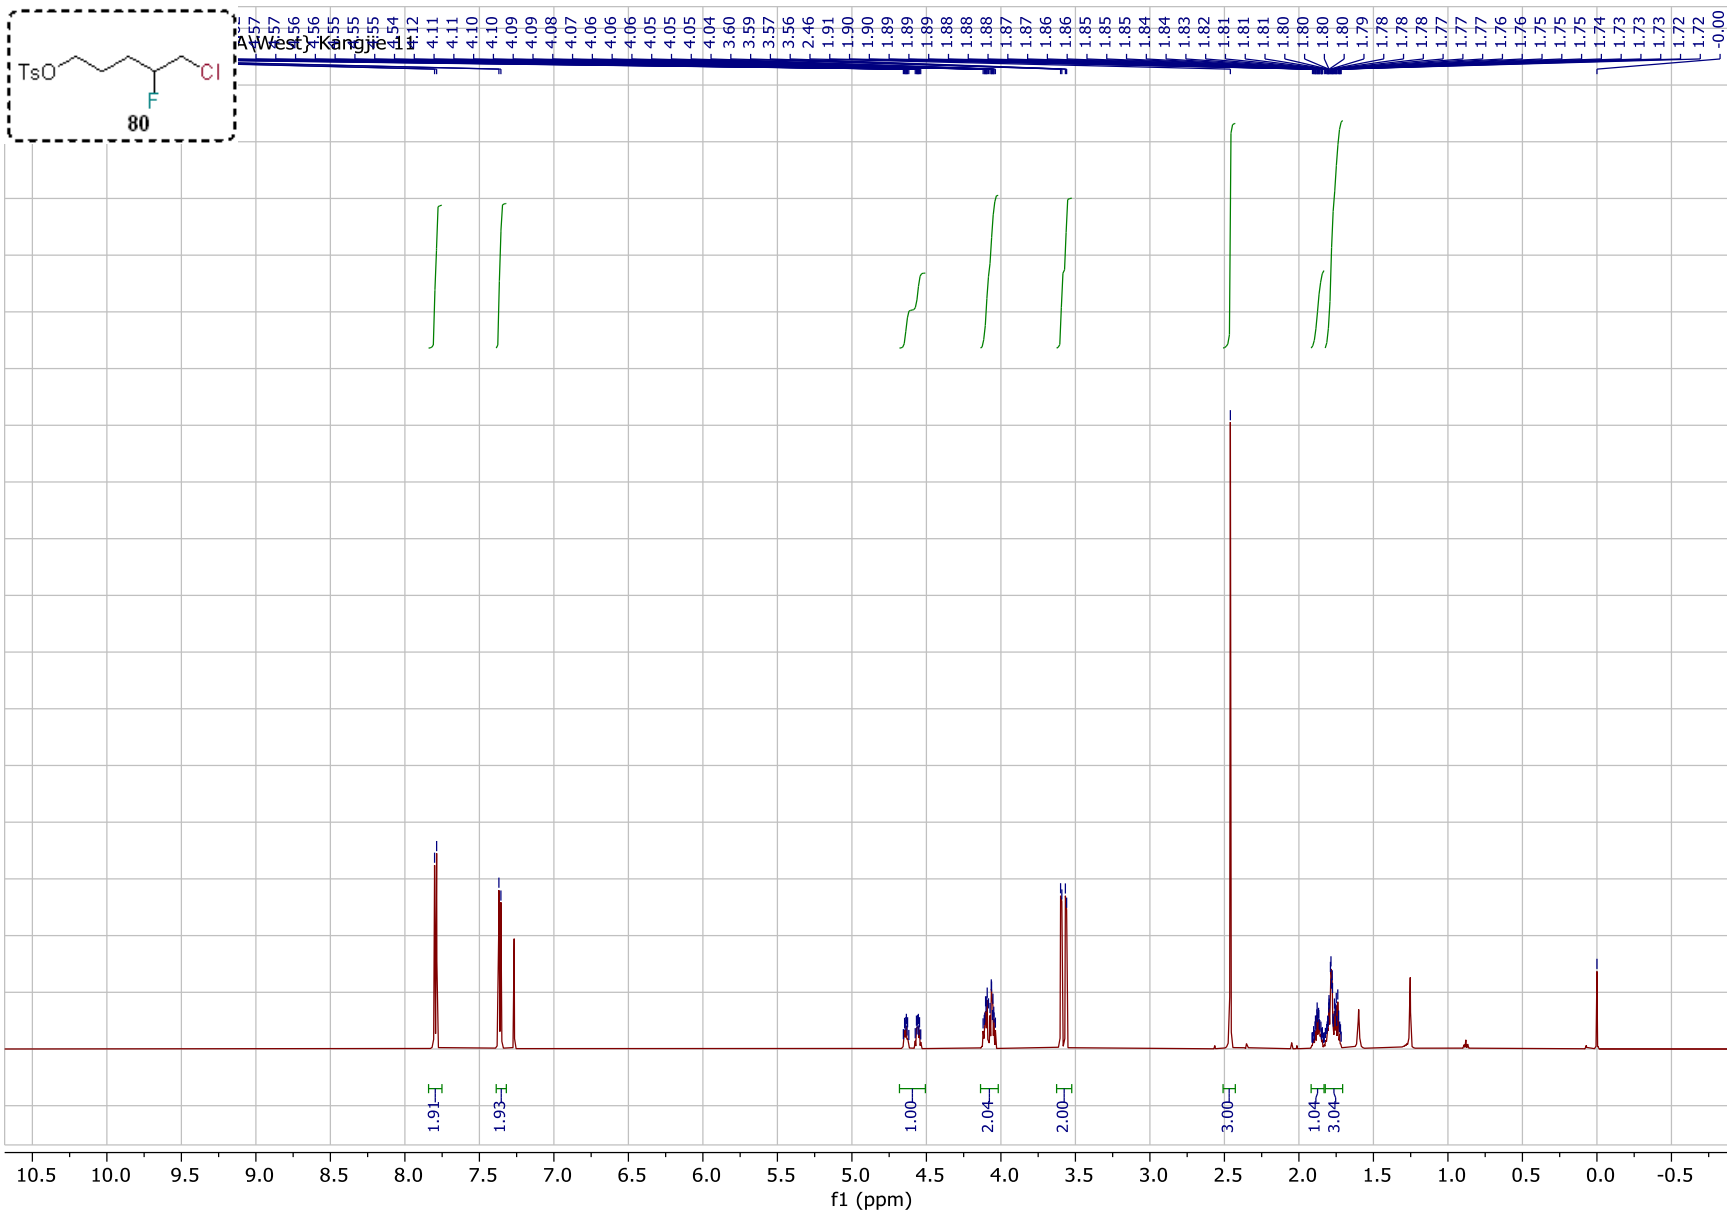

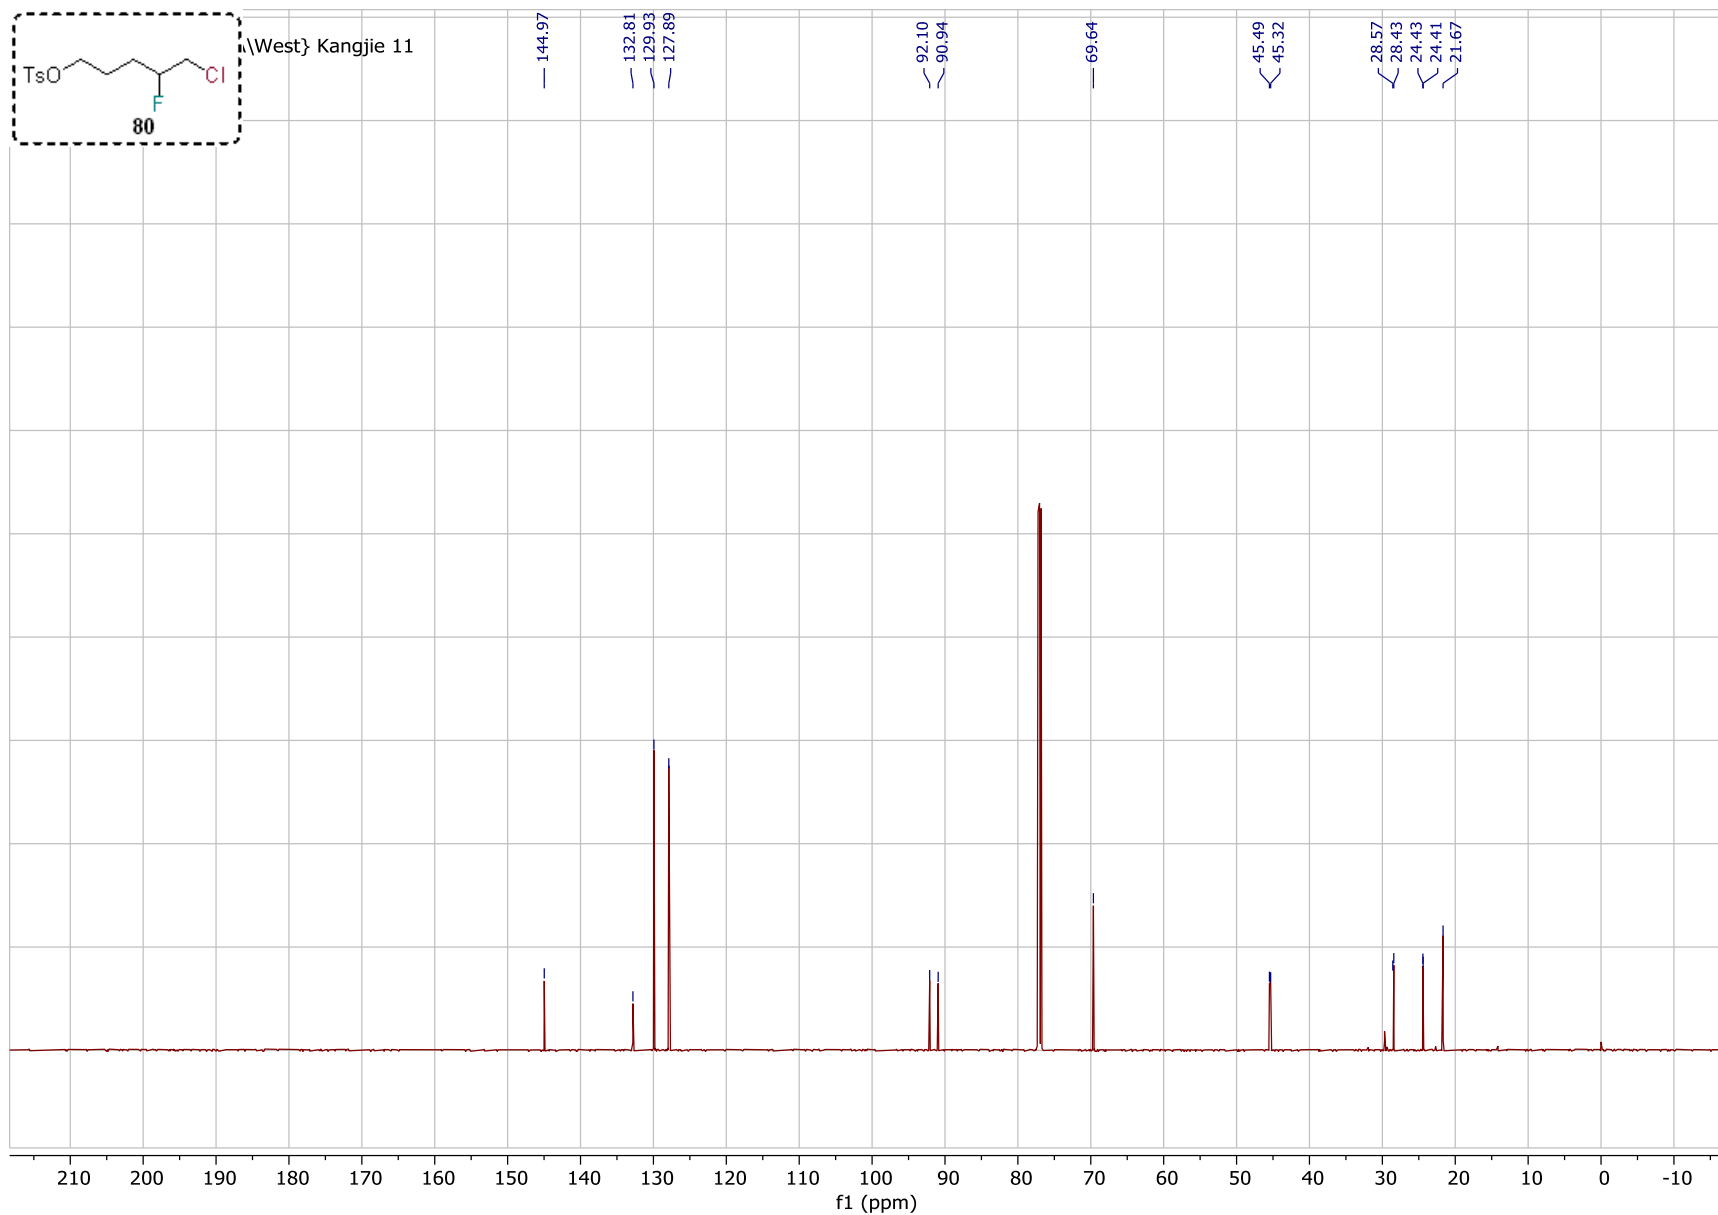

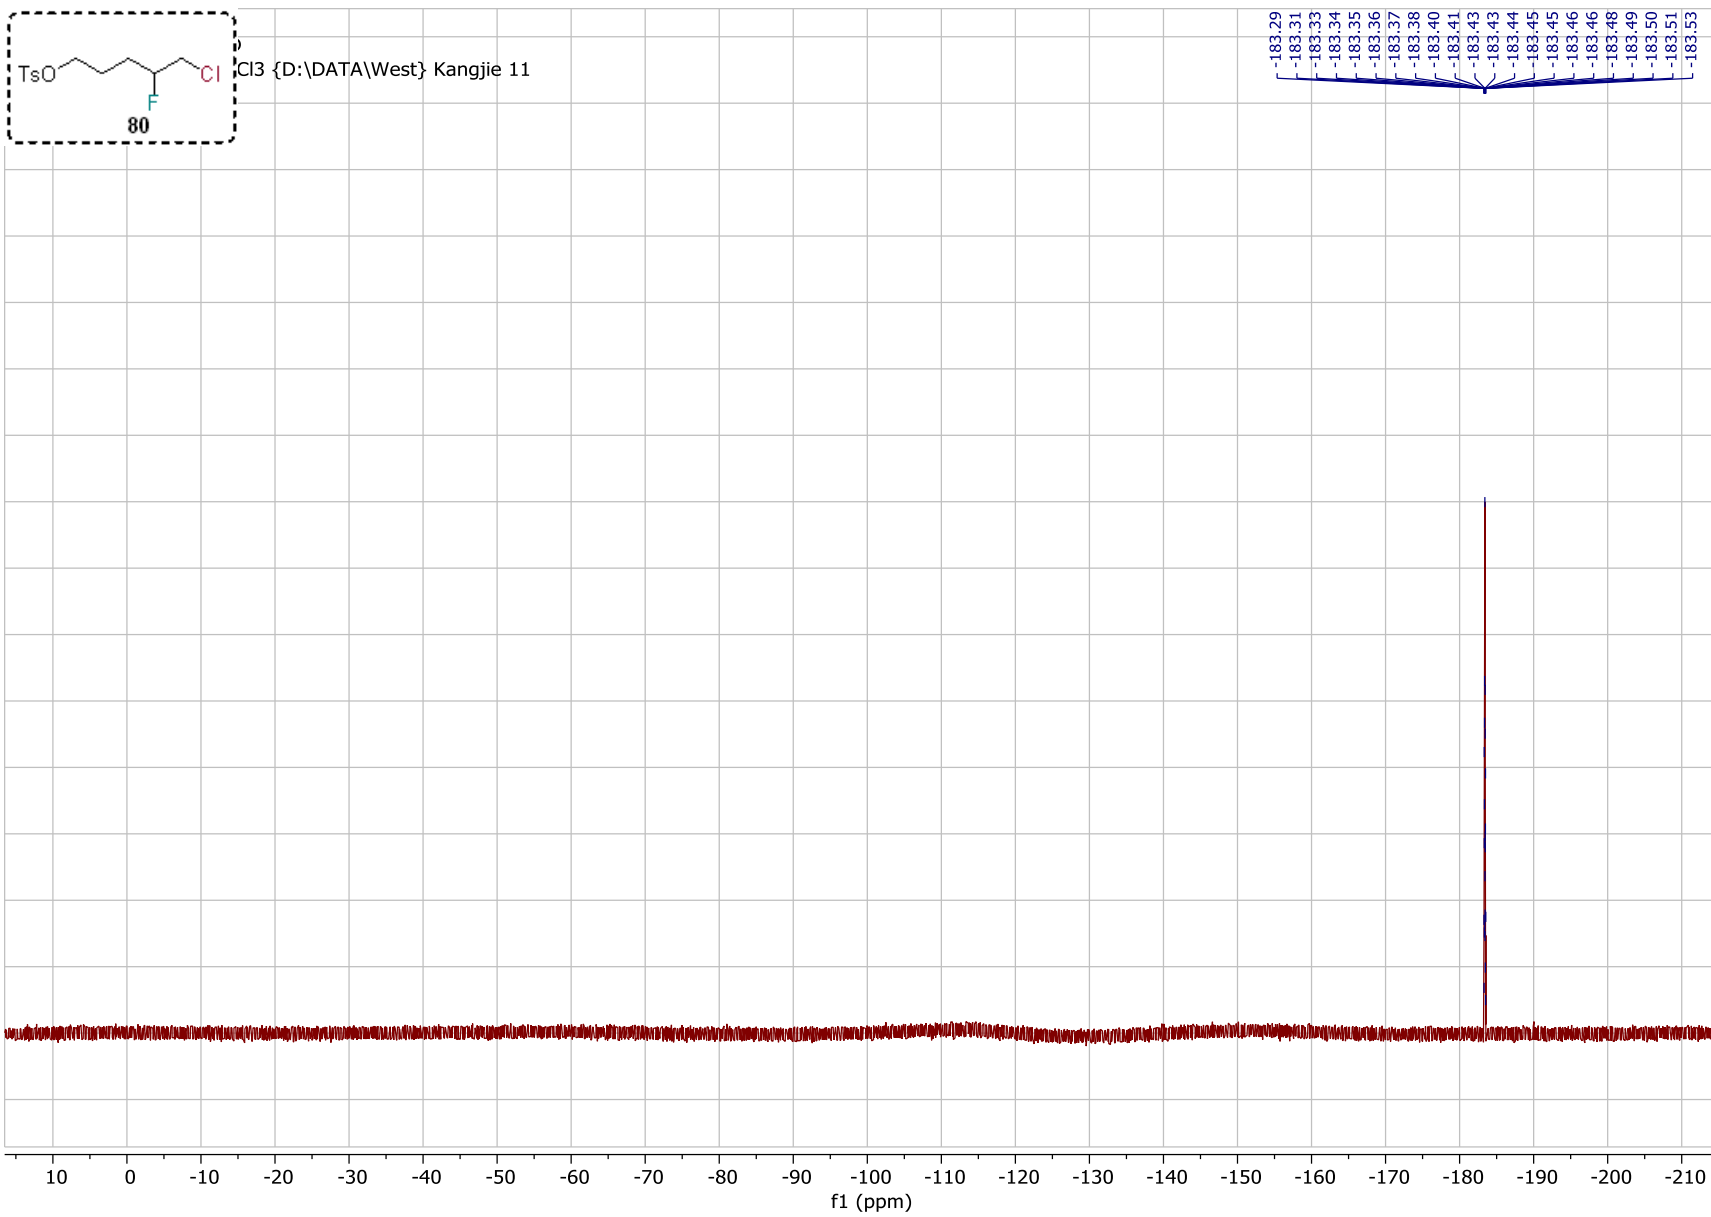

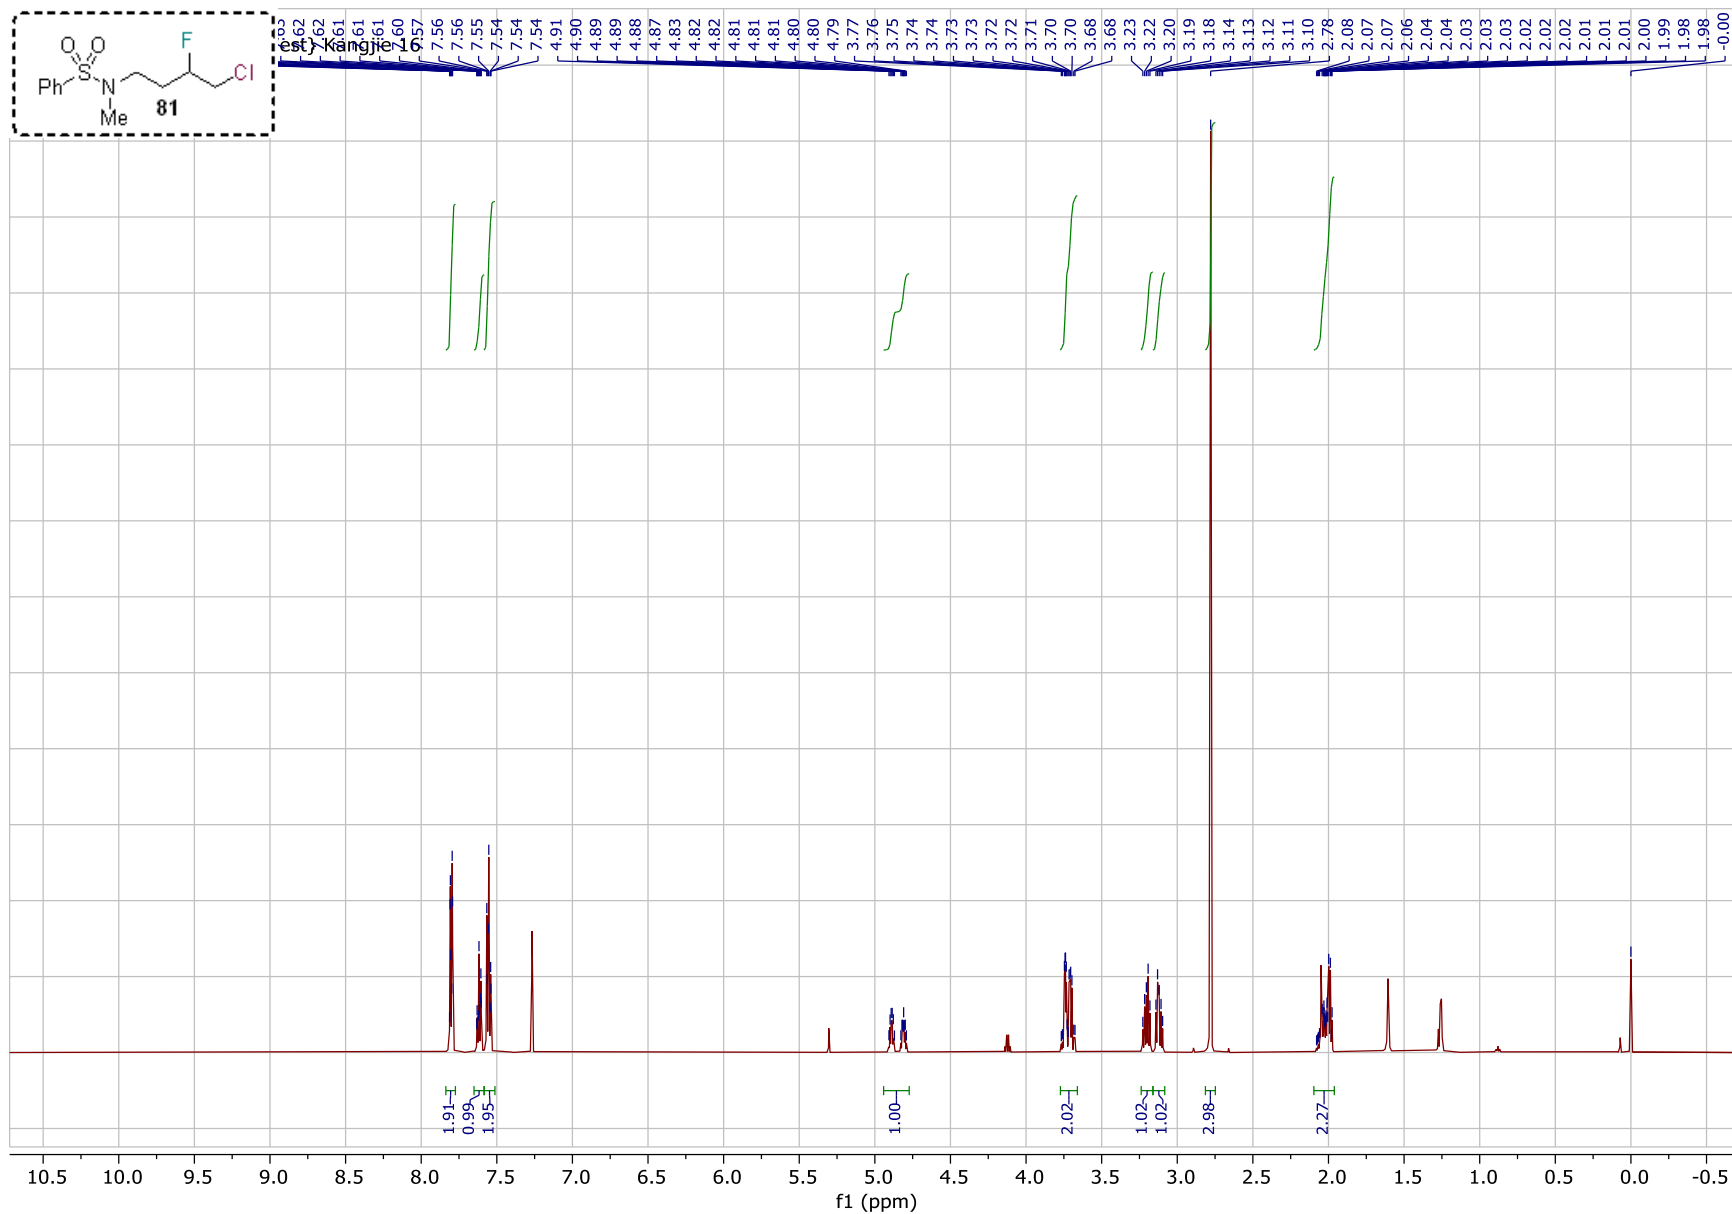

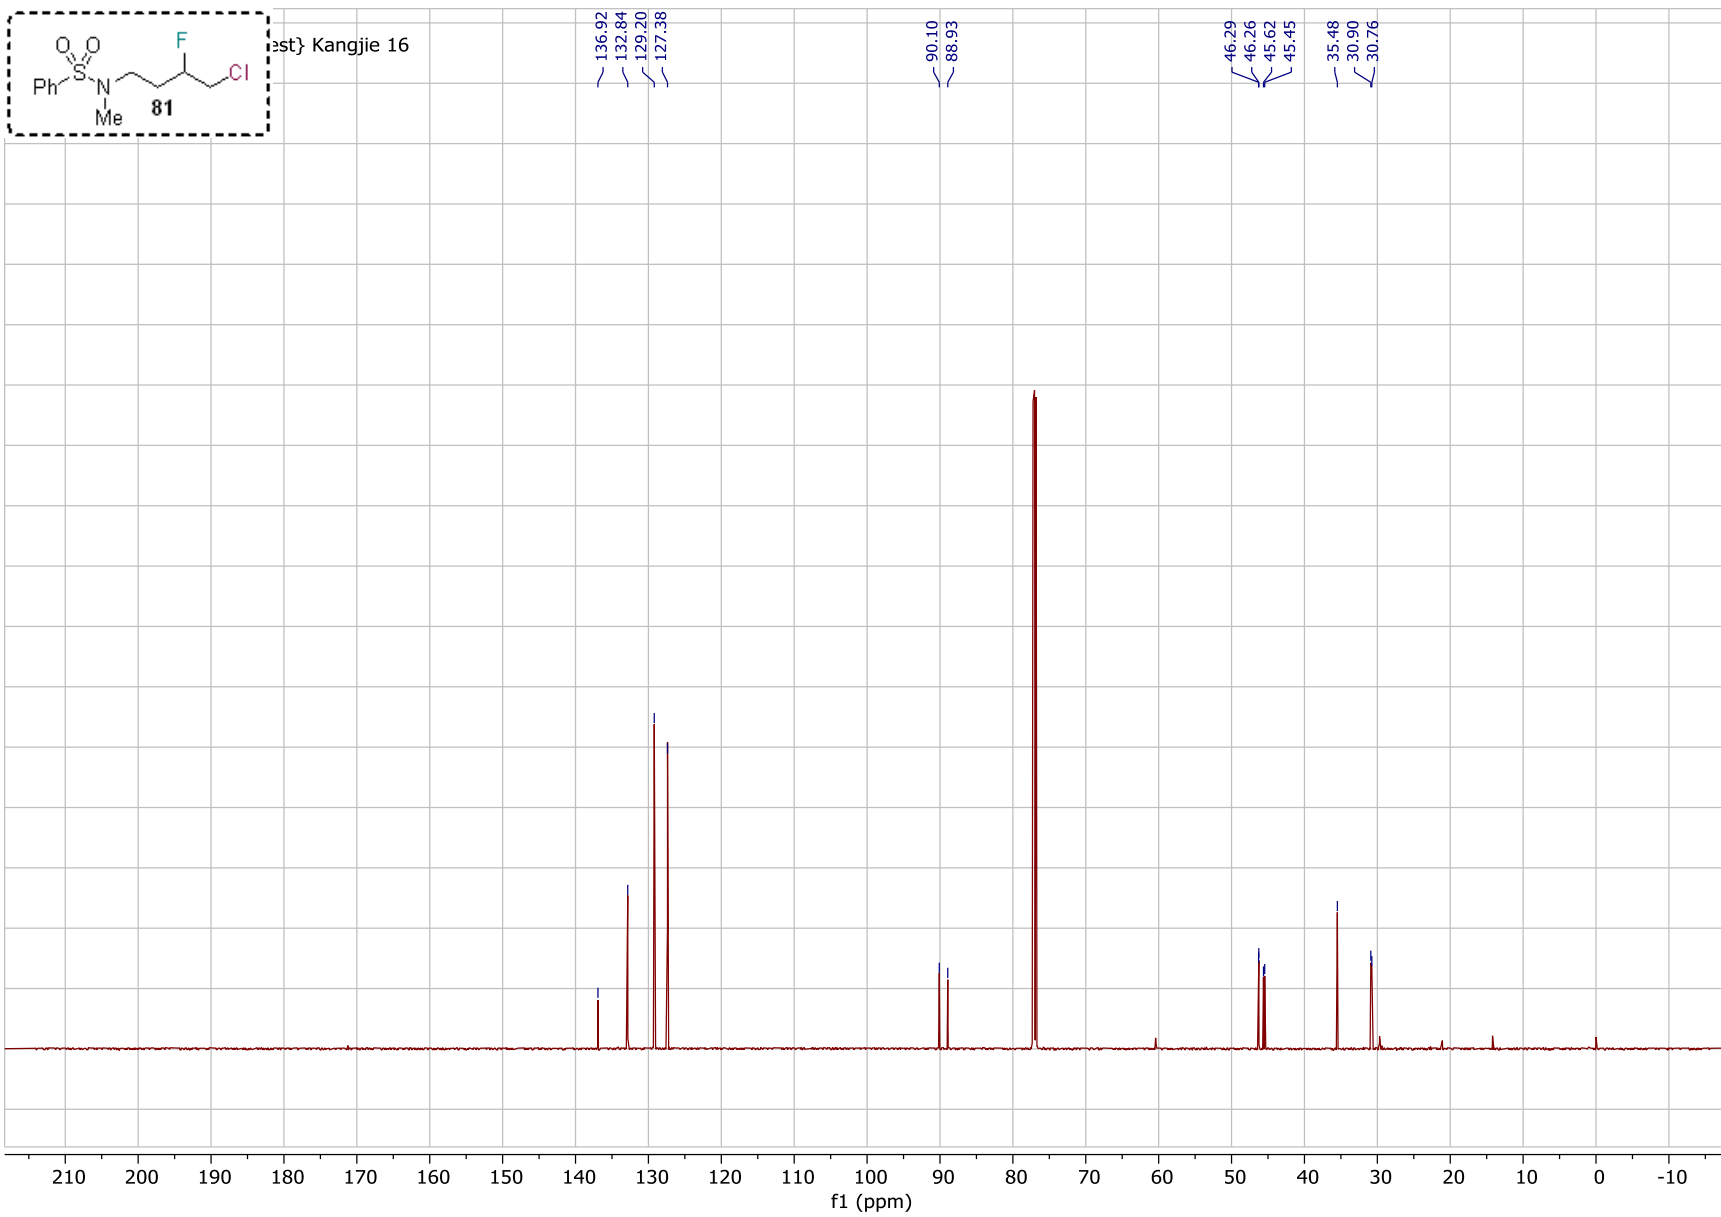

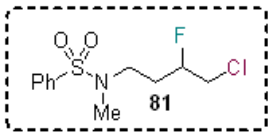

{D:\DATA\West} Kangjie 16

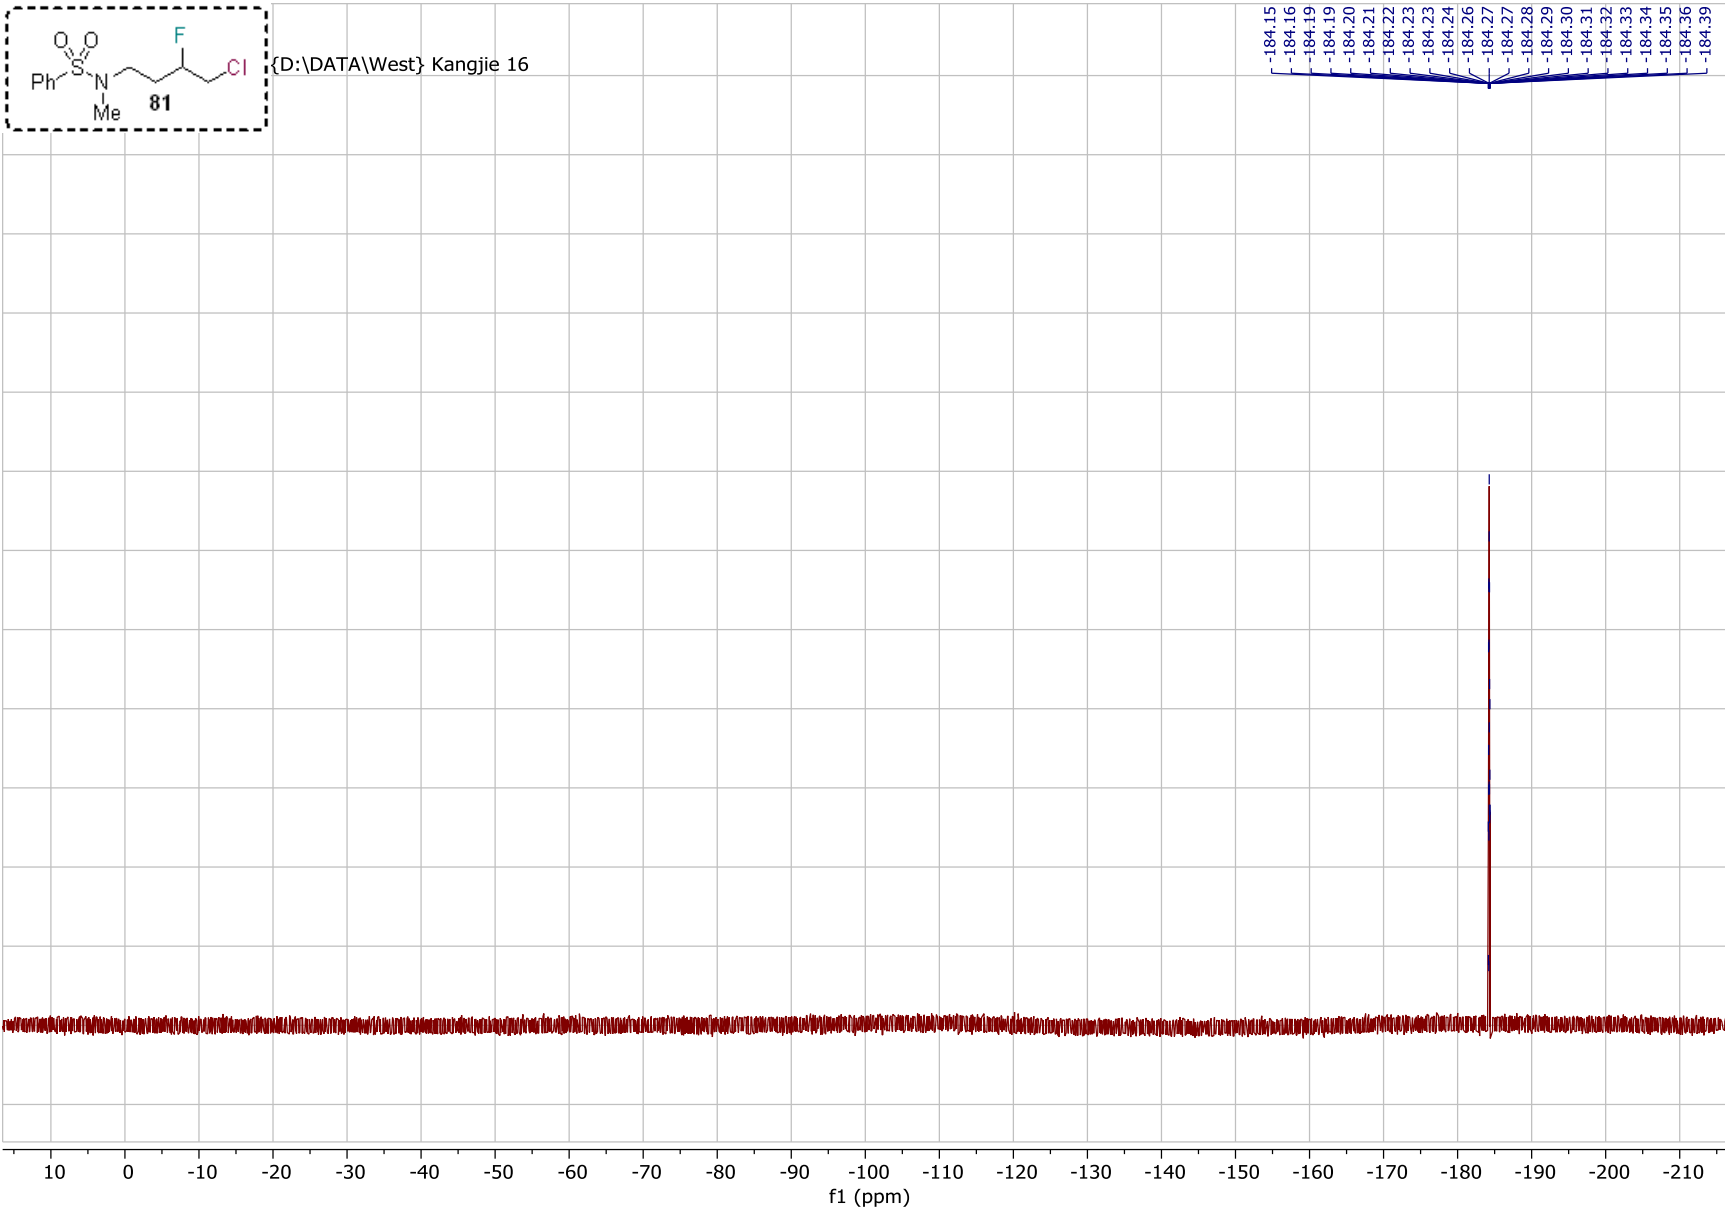

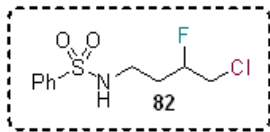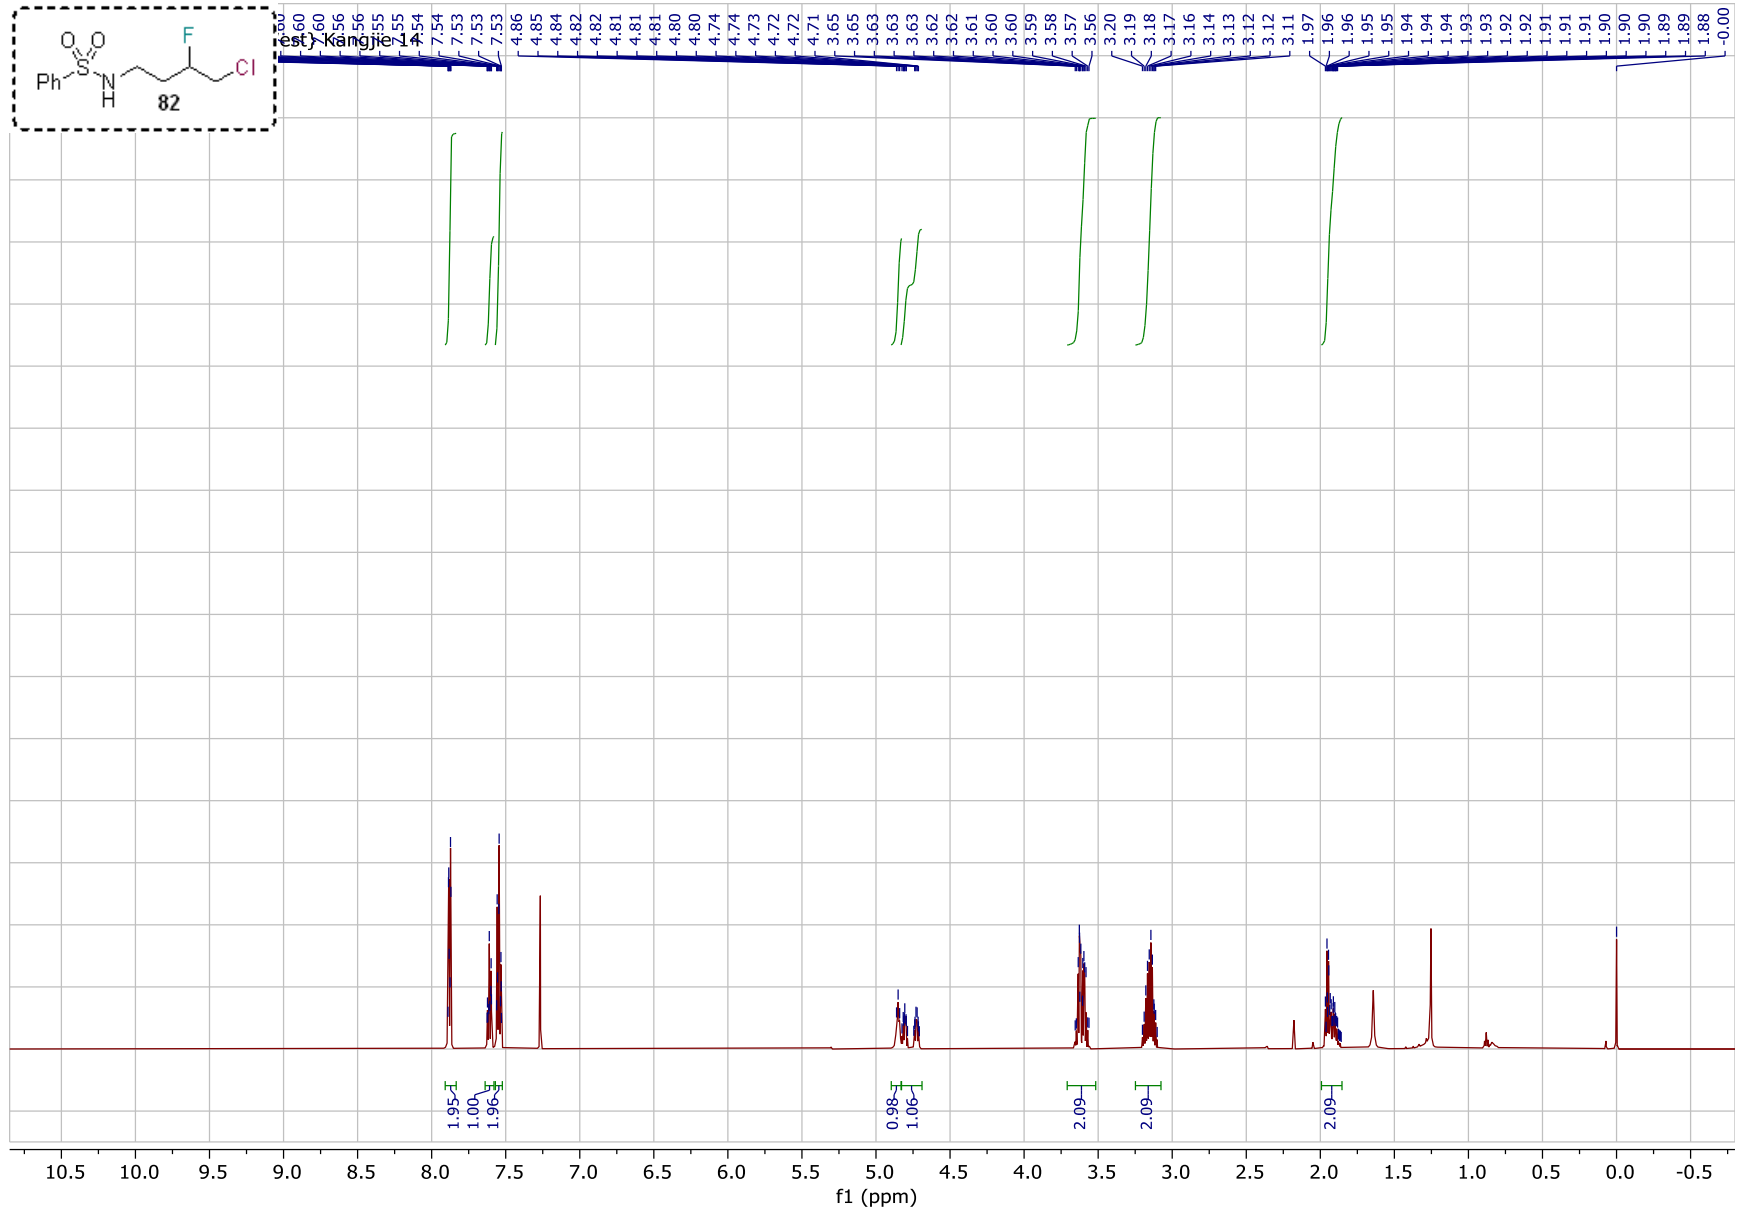



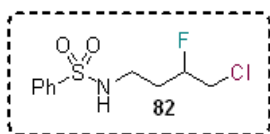

est) Kangjie 14

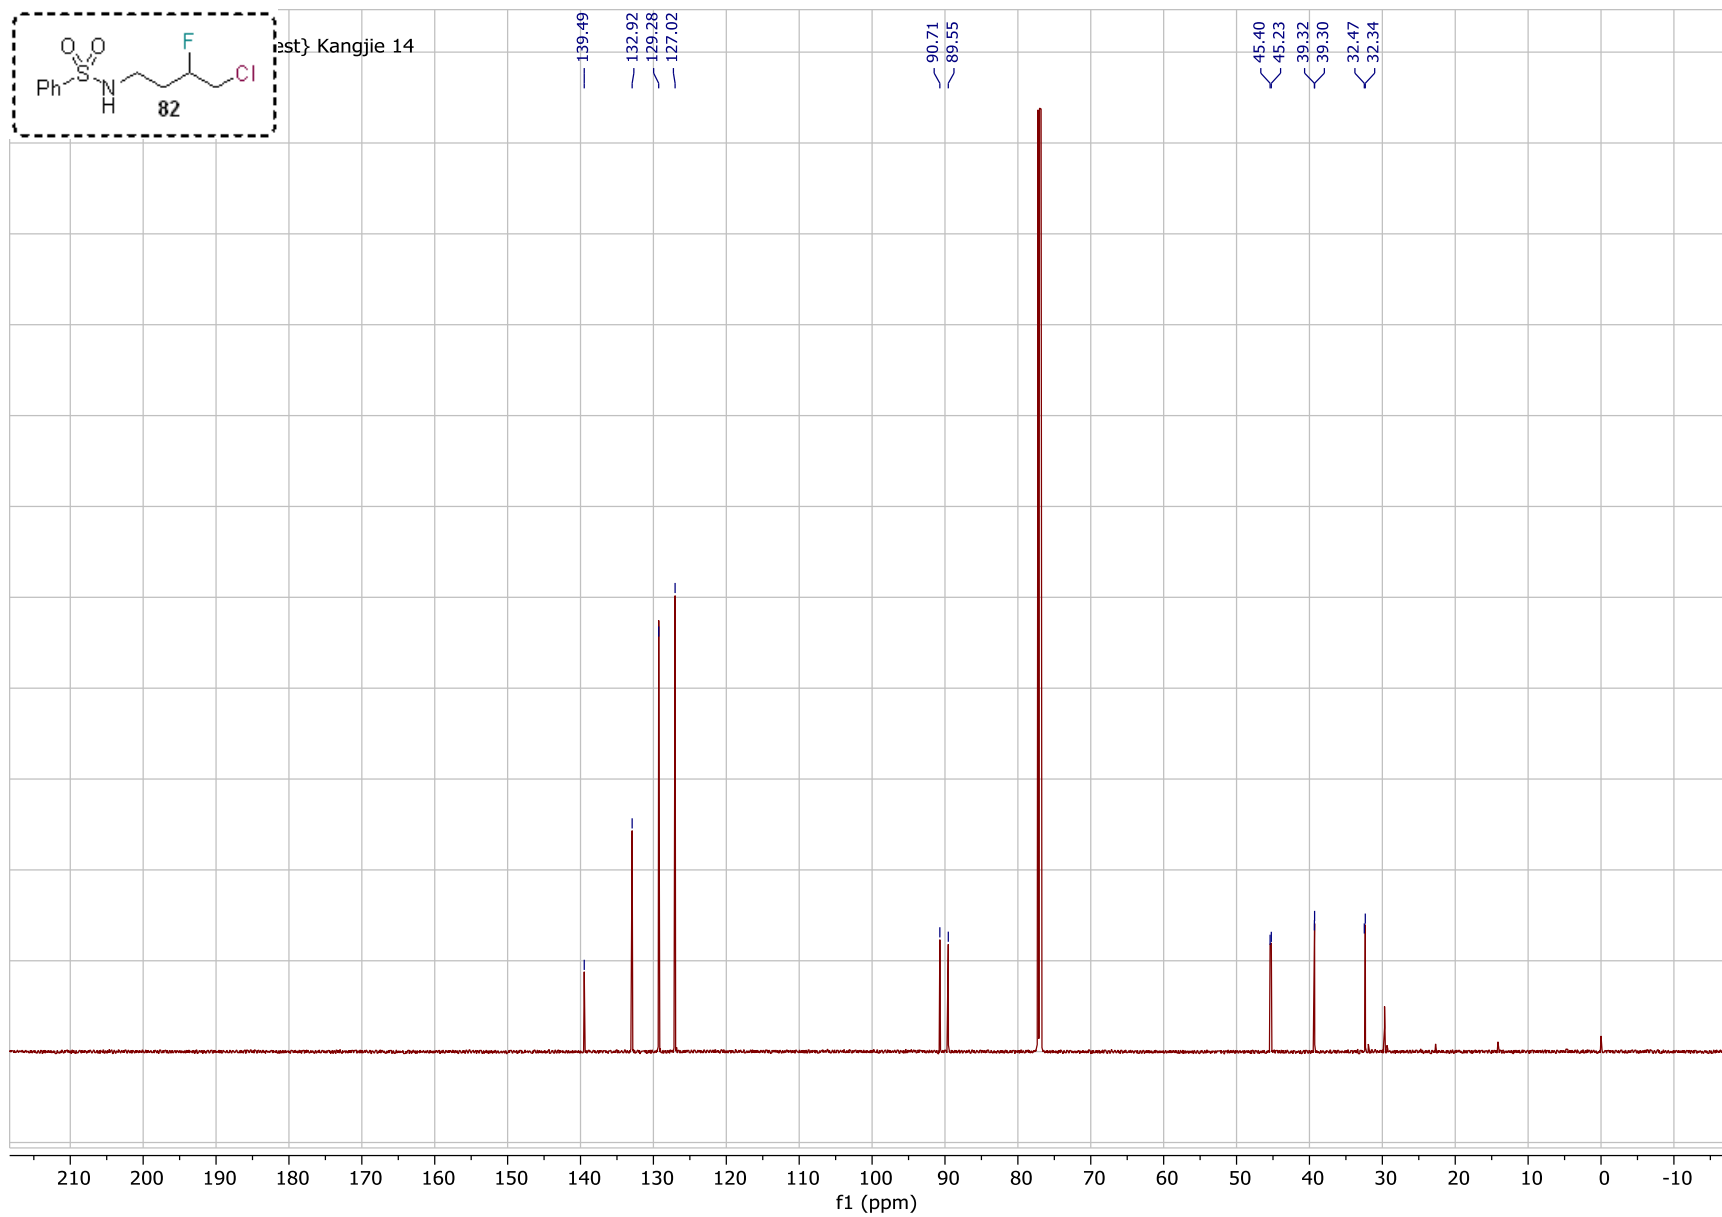

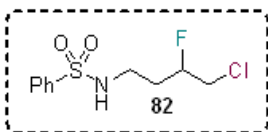

{D:\DATA\West} Kangjie 14

- 184.37
- 184.40
- 184.41
- 184.43
- 184.44
- 184.44
- 184.46
- 184.47
- 184.49
- 184.50
- 184.51
- 184.53
- 184.54
- 184.56
- 184.58
- 184.61

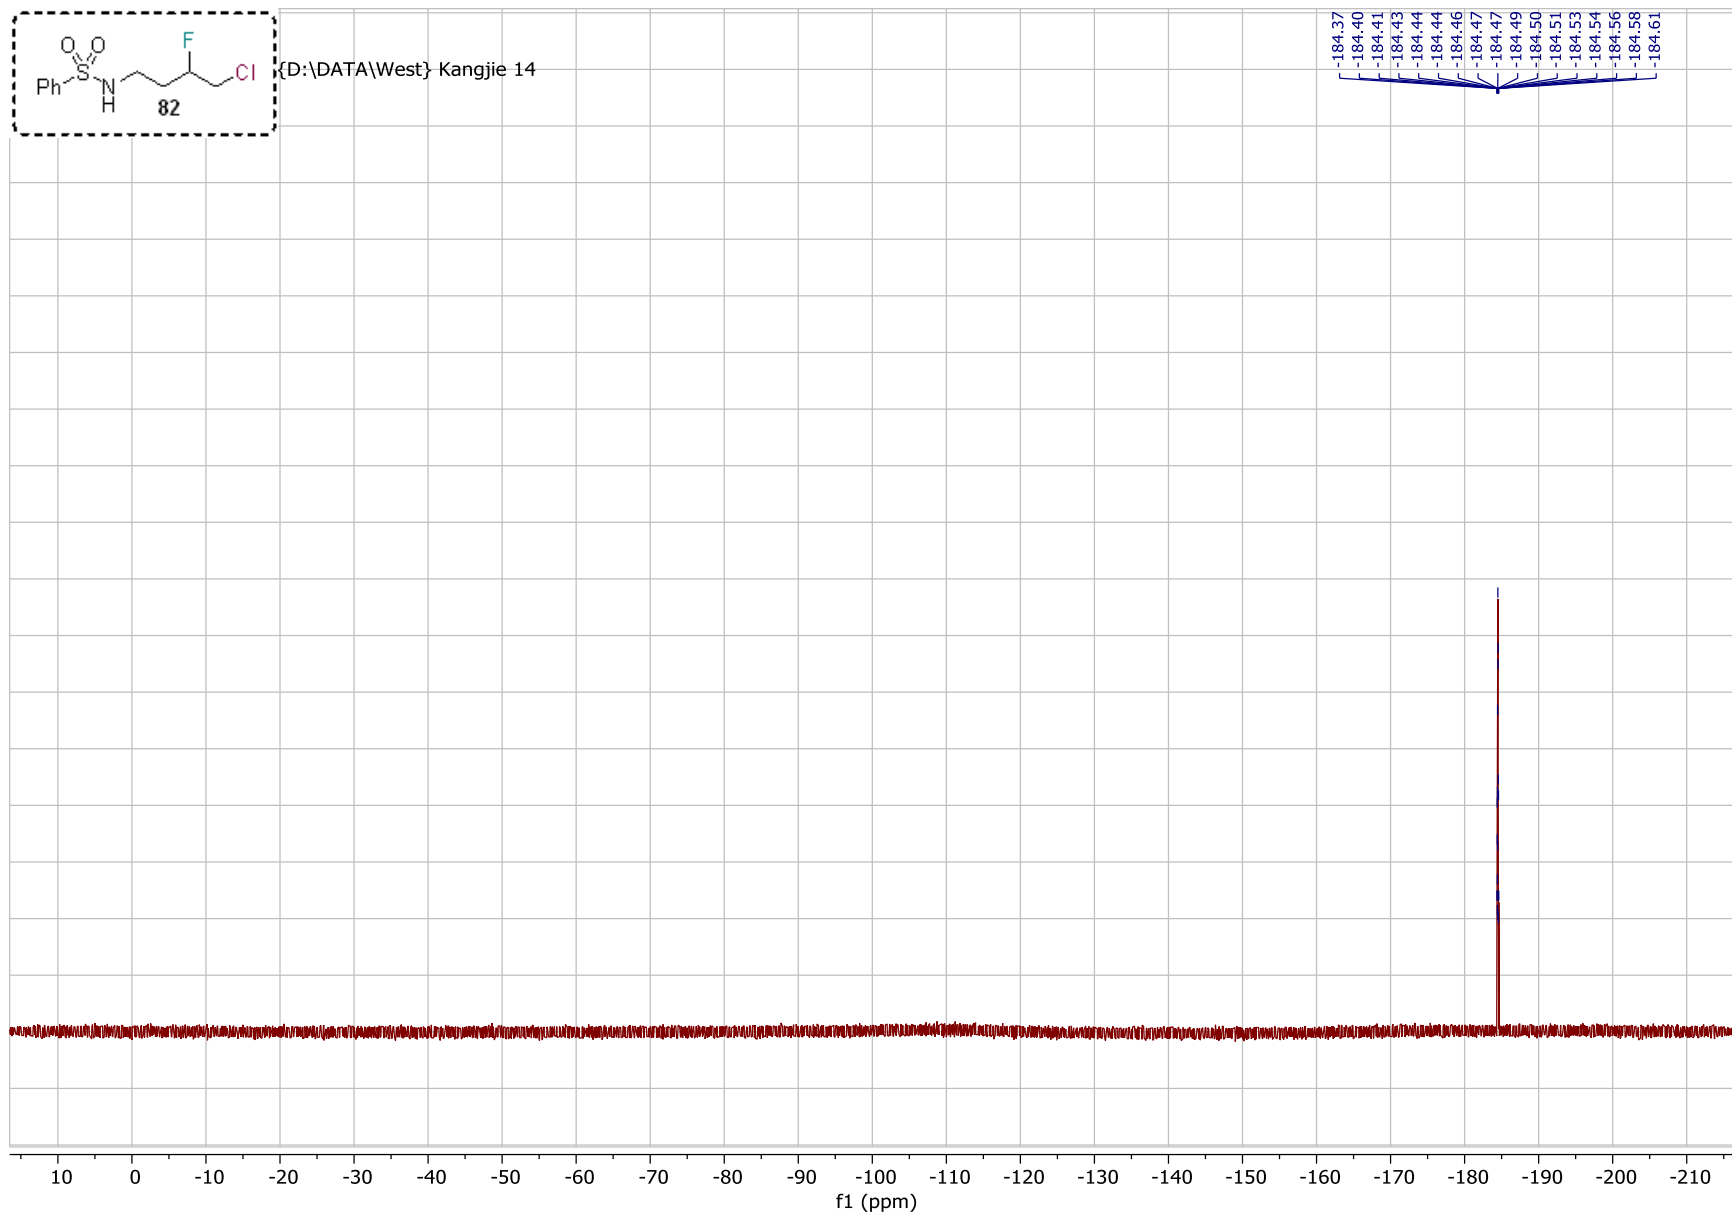

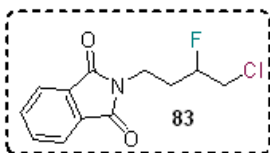

est) Kangjie

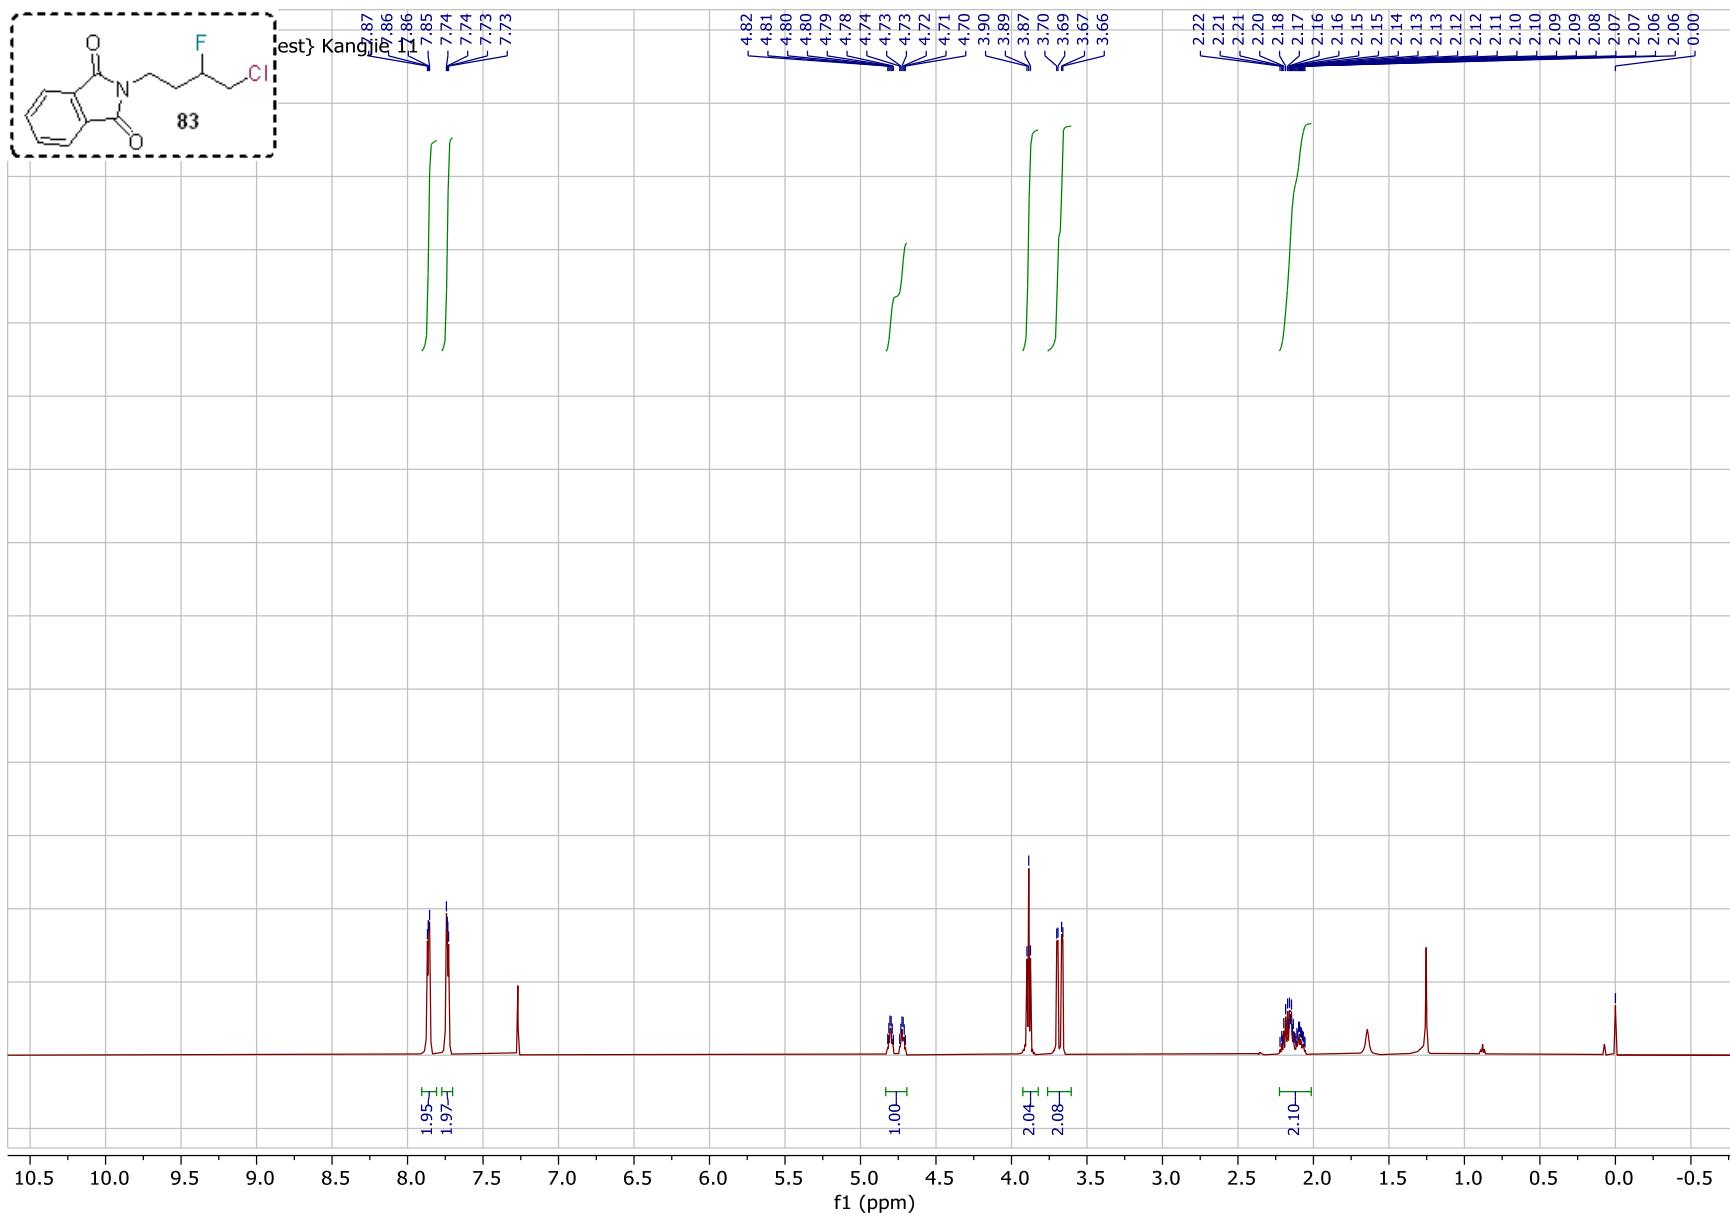

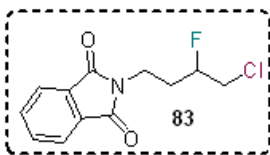

est) Kang 11

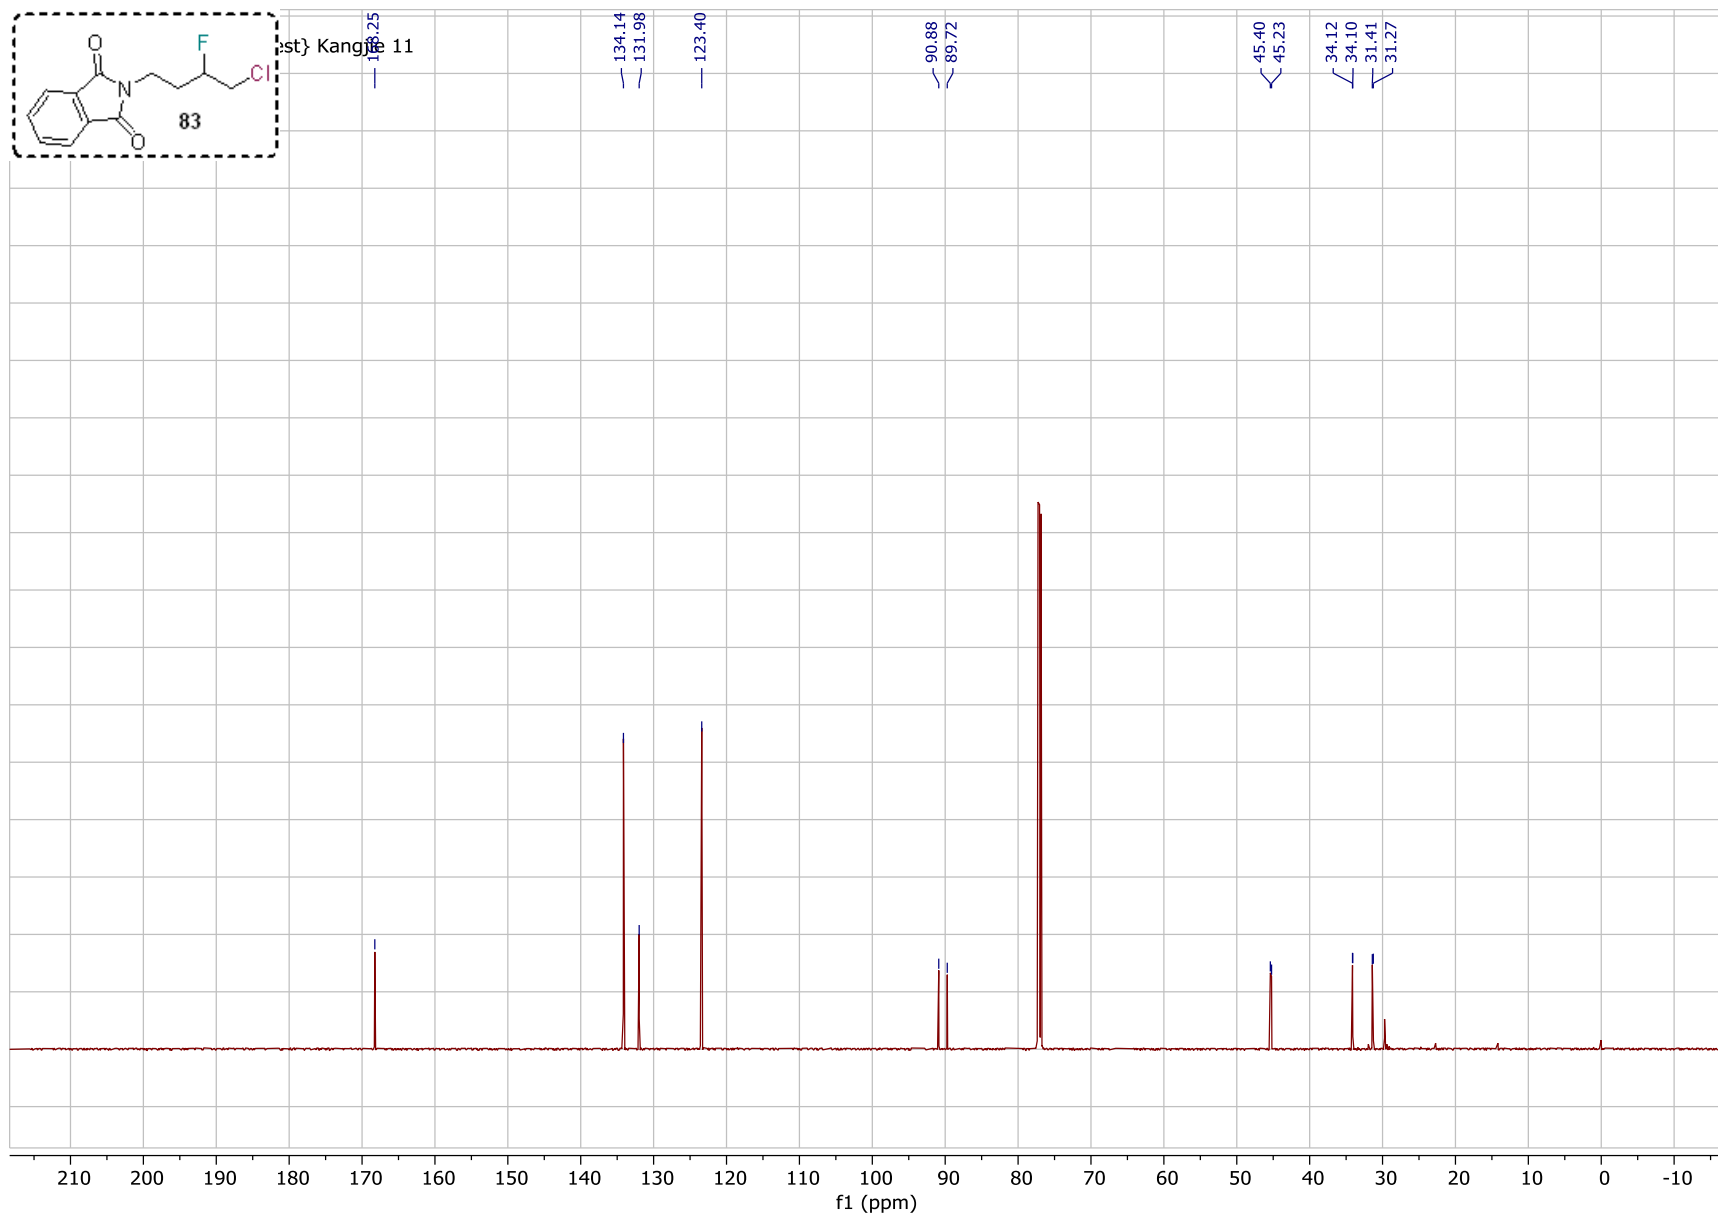



[D:\DATA\West} Kangjie 11

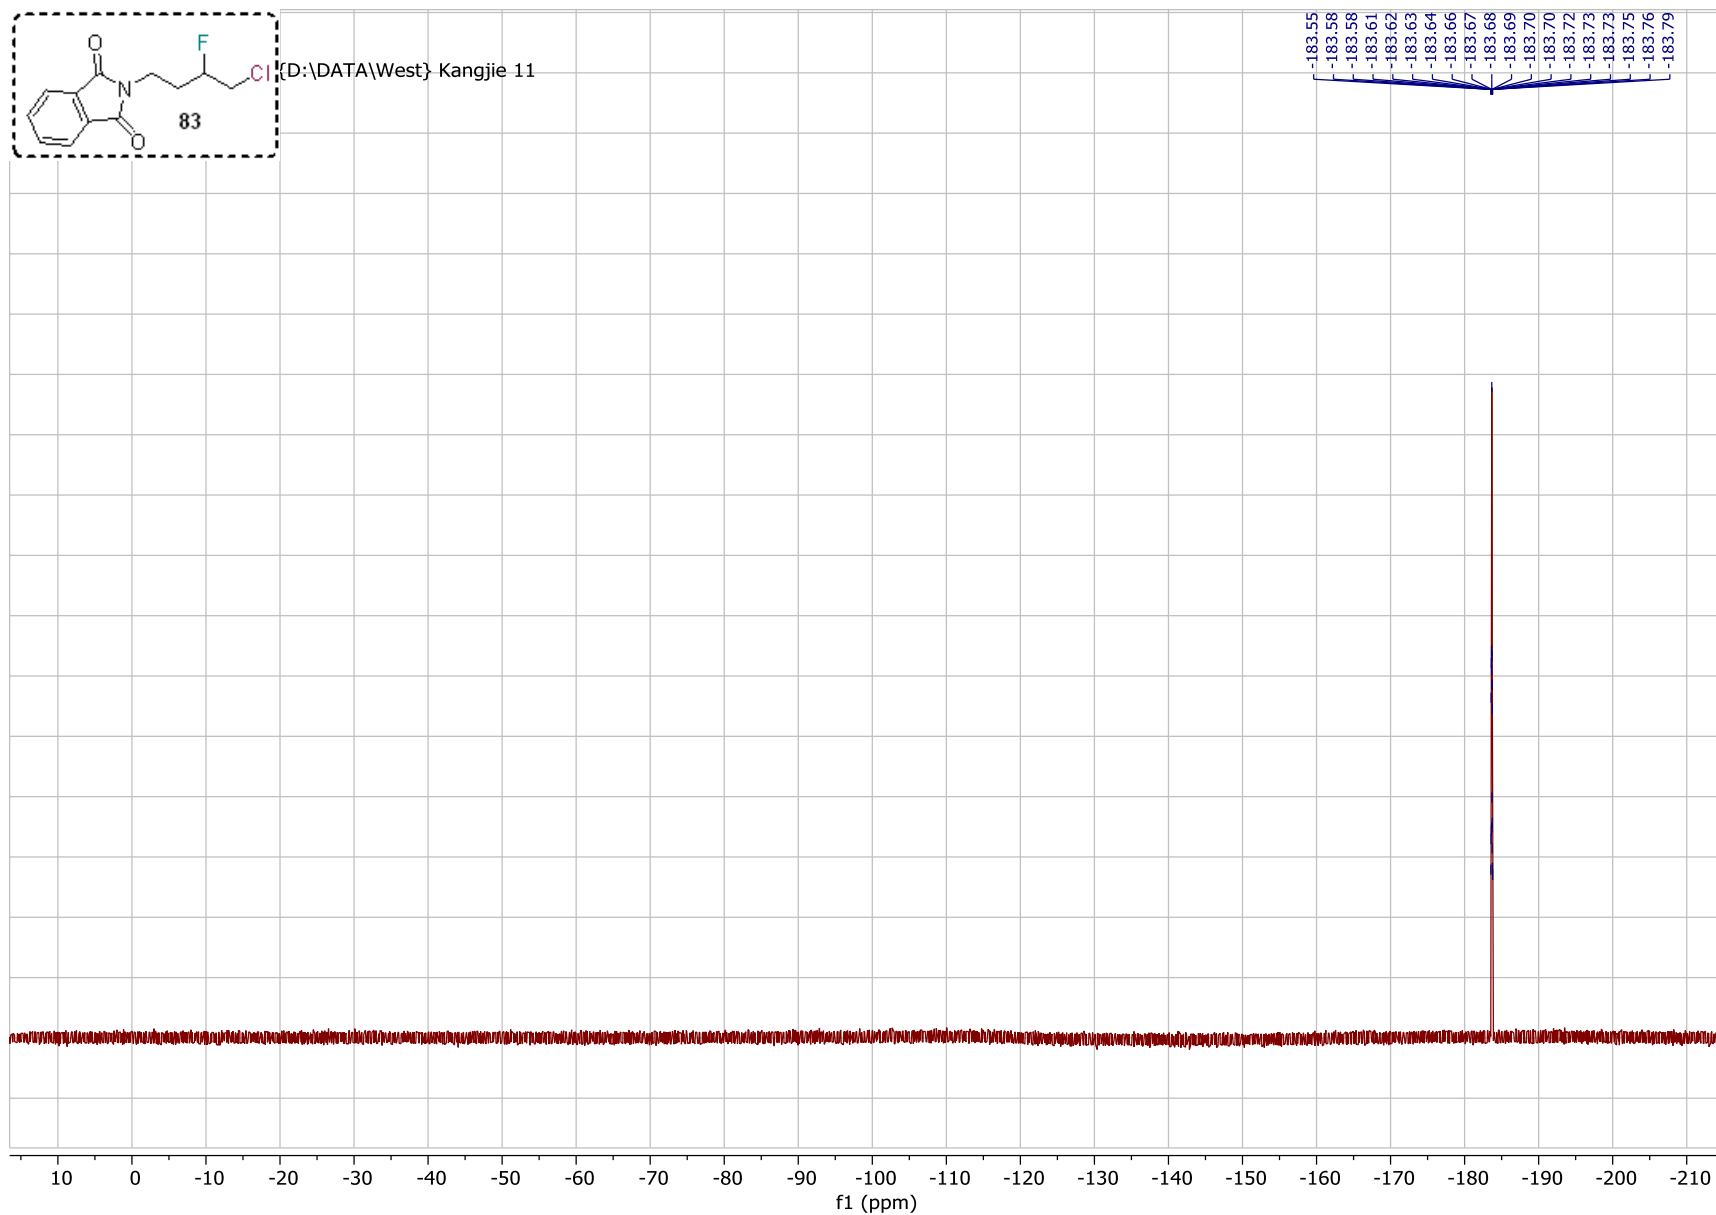

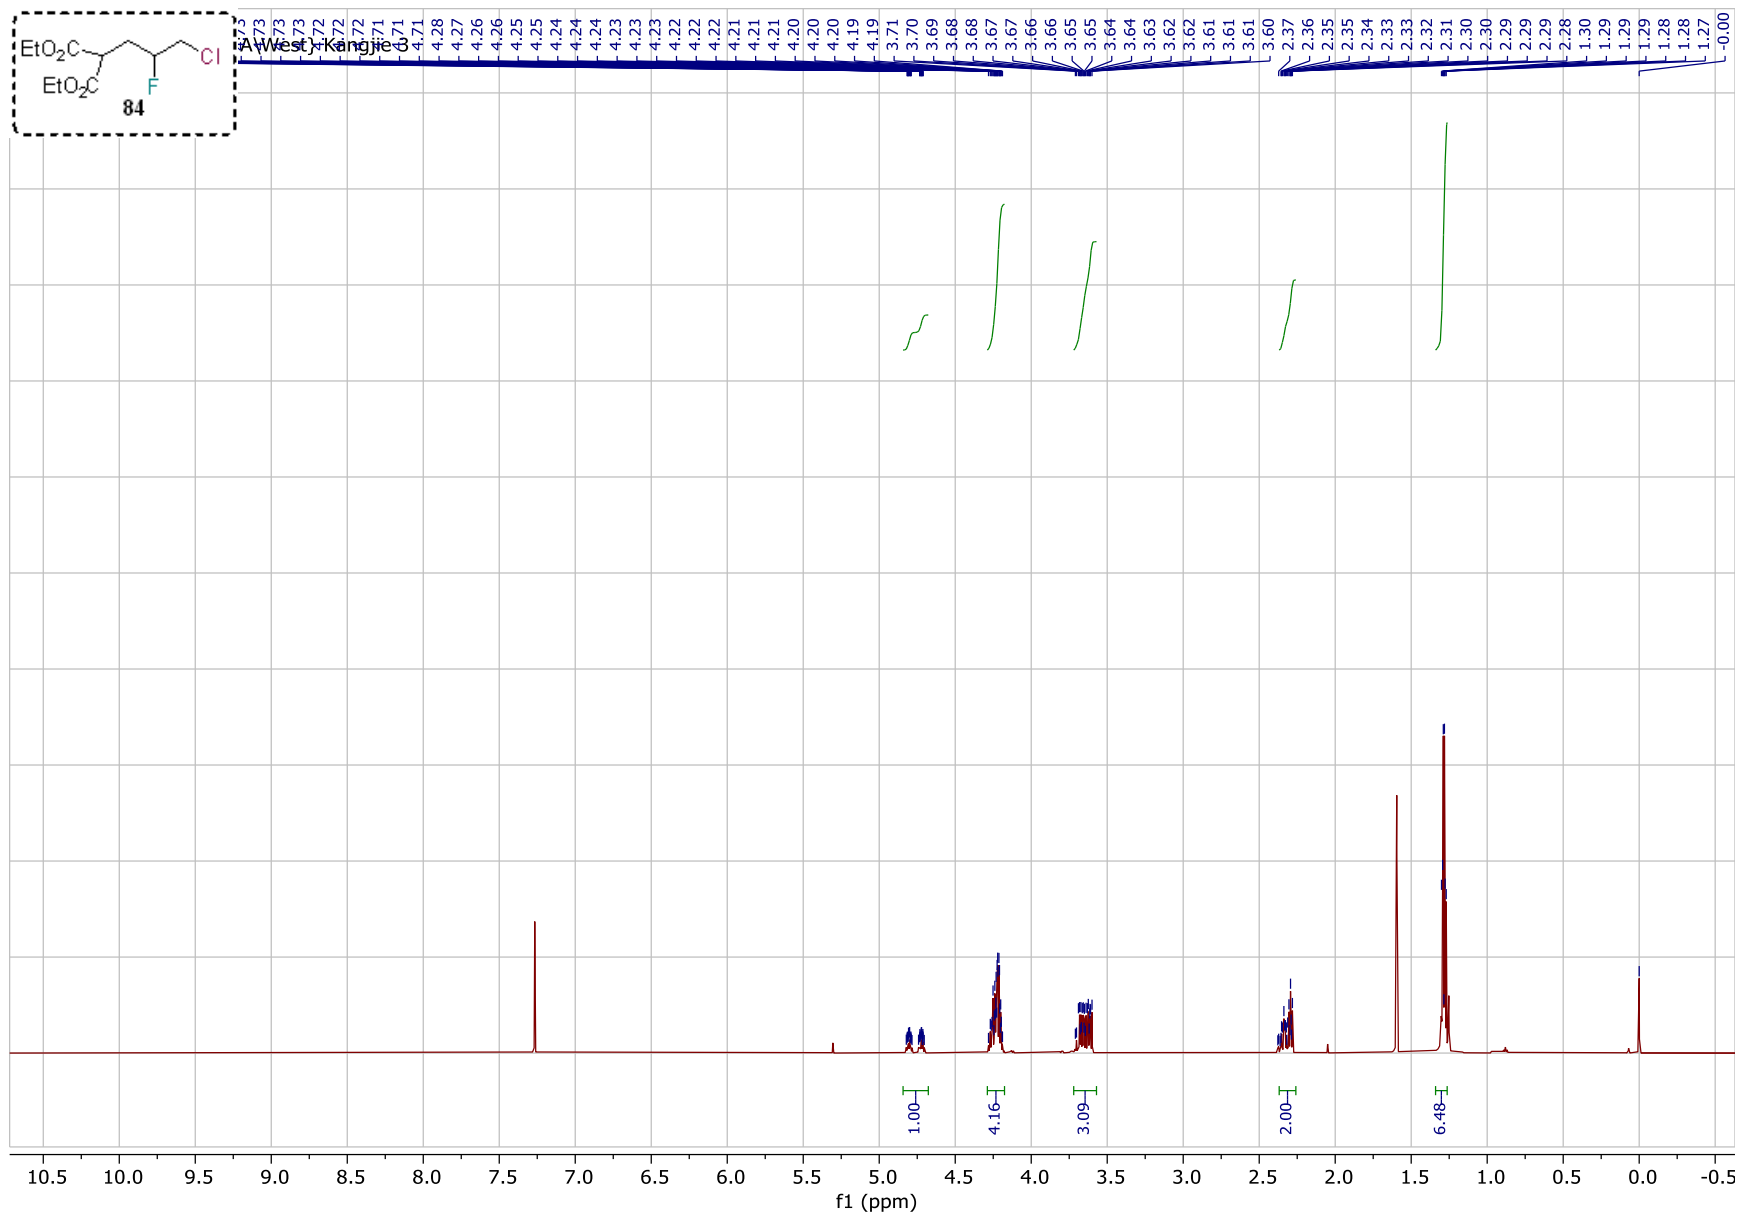

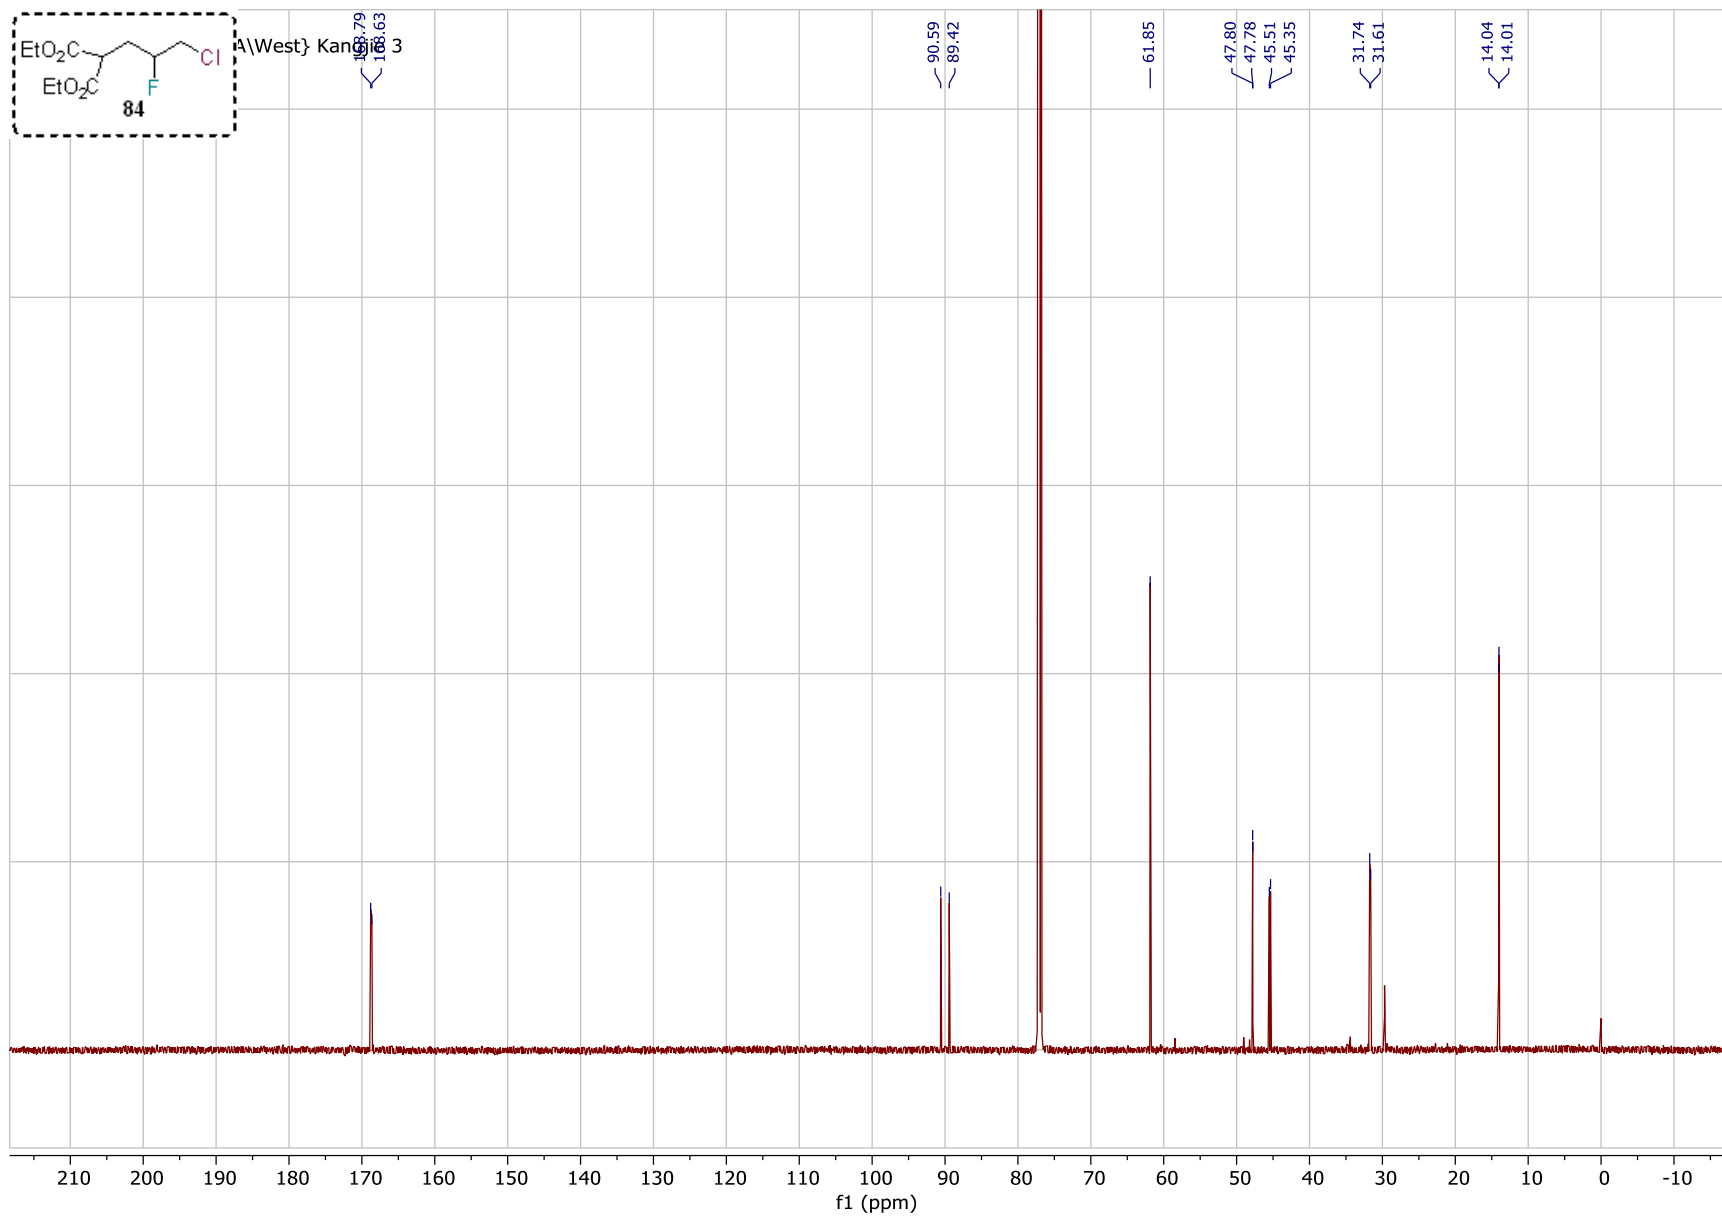

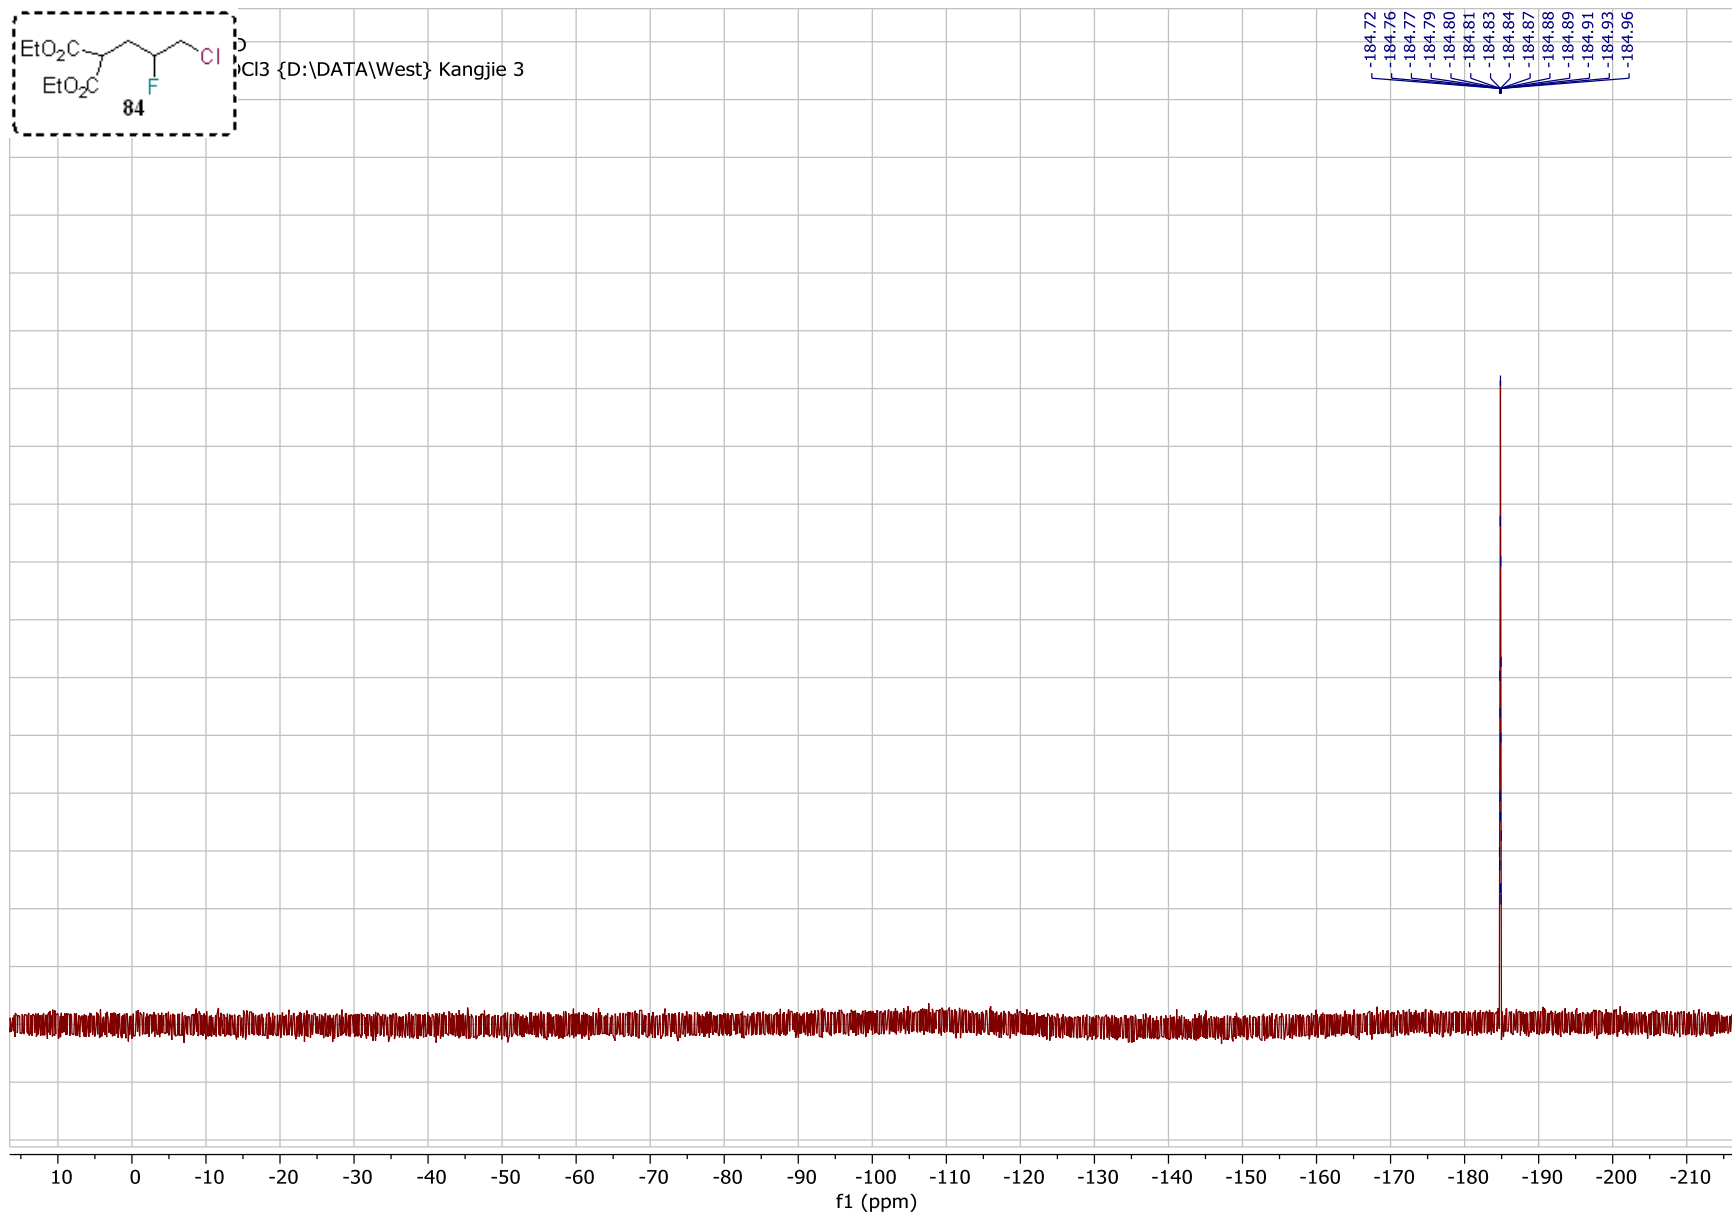



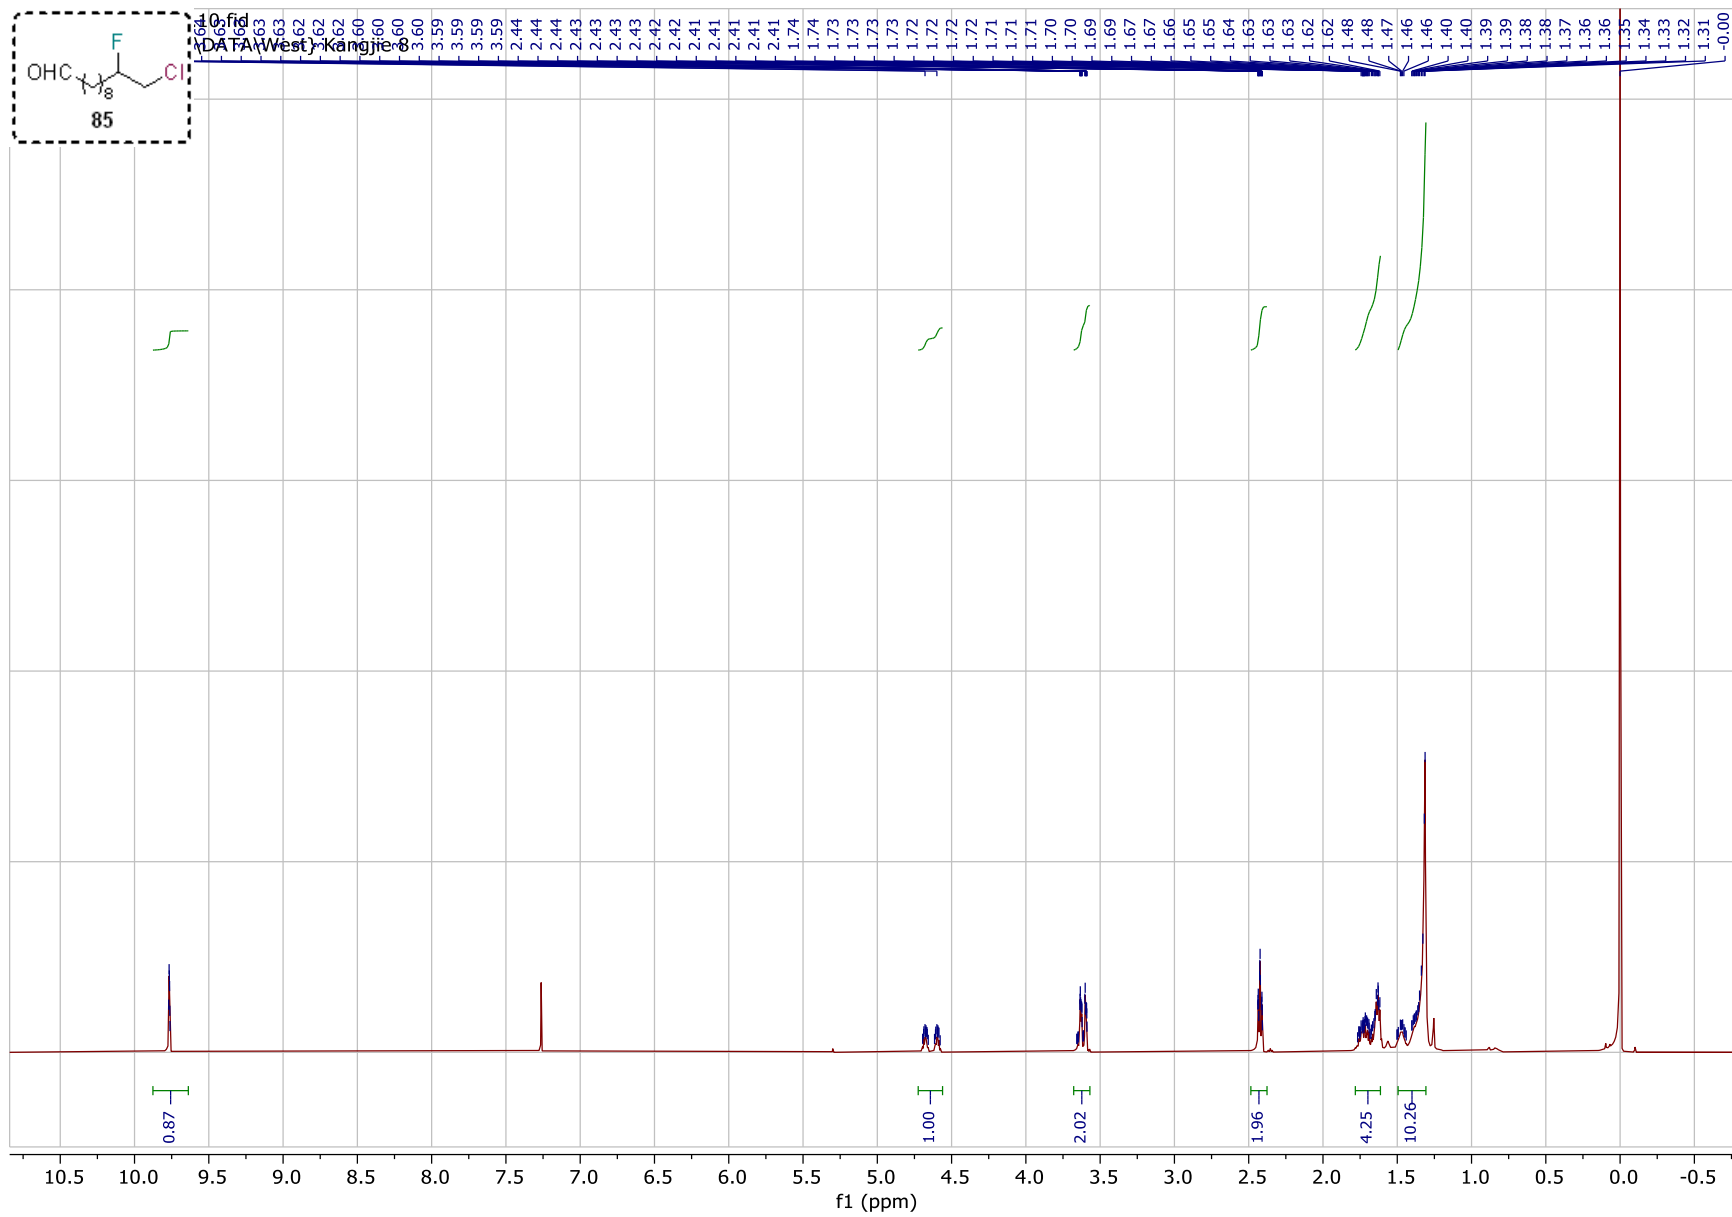

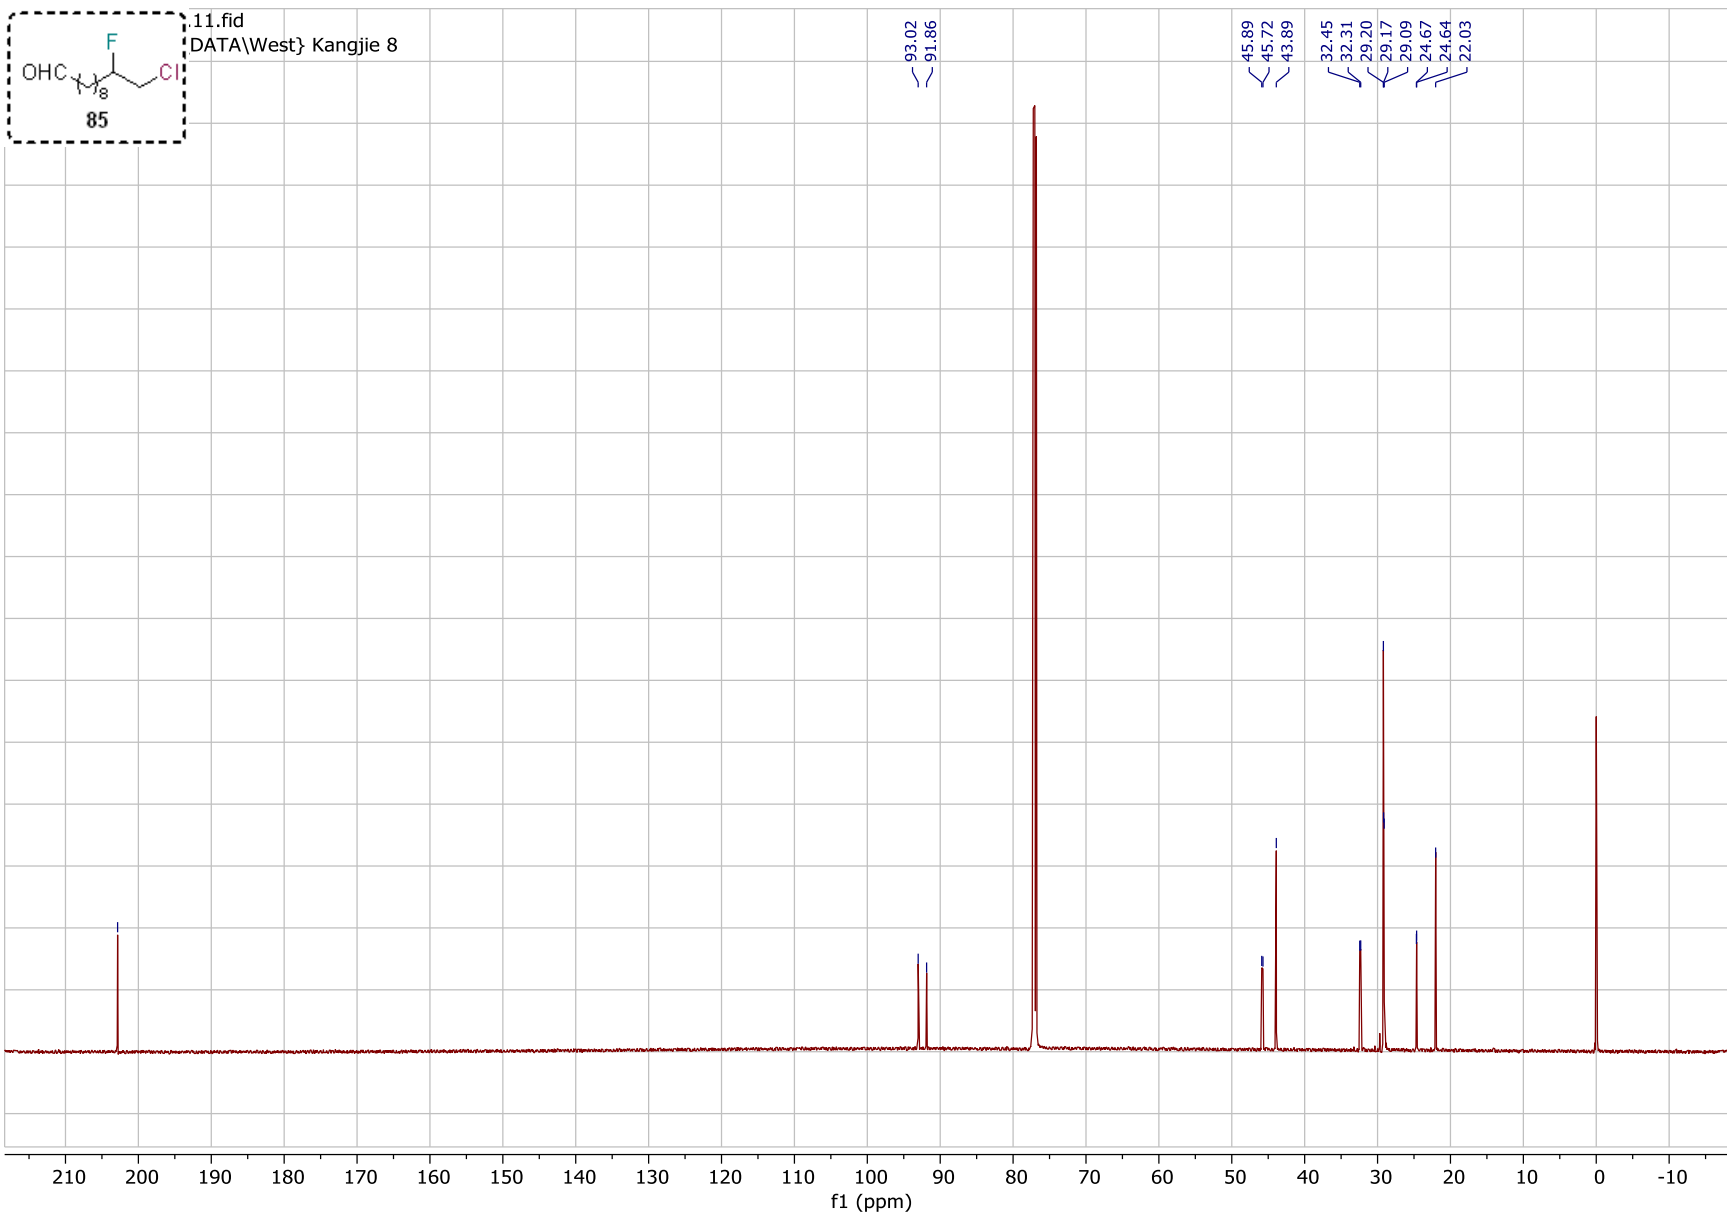

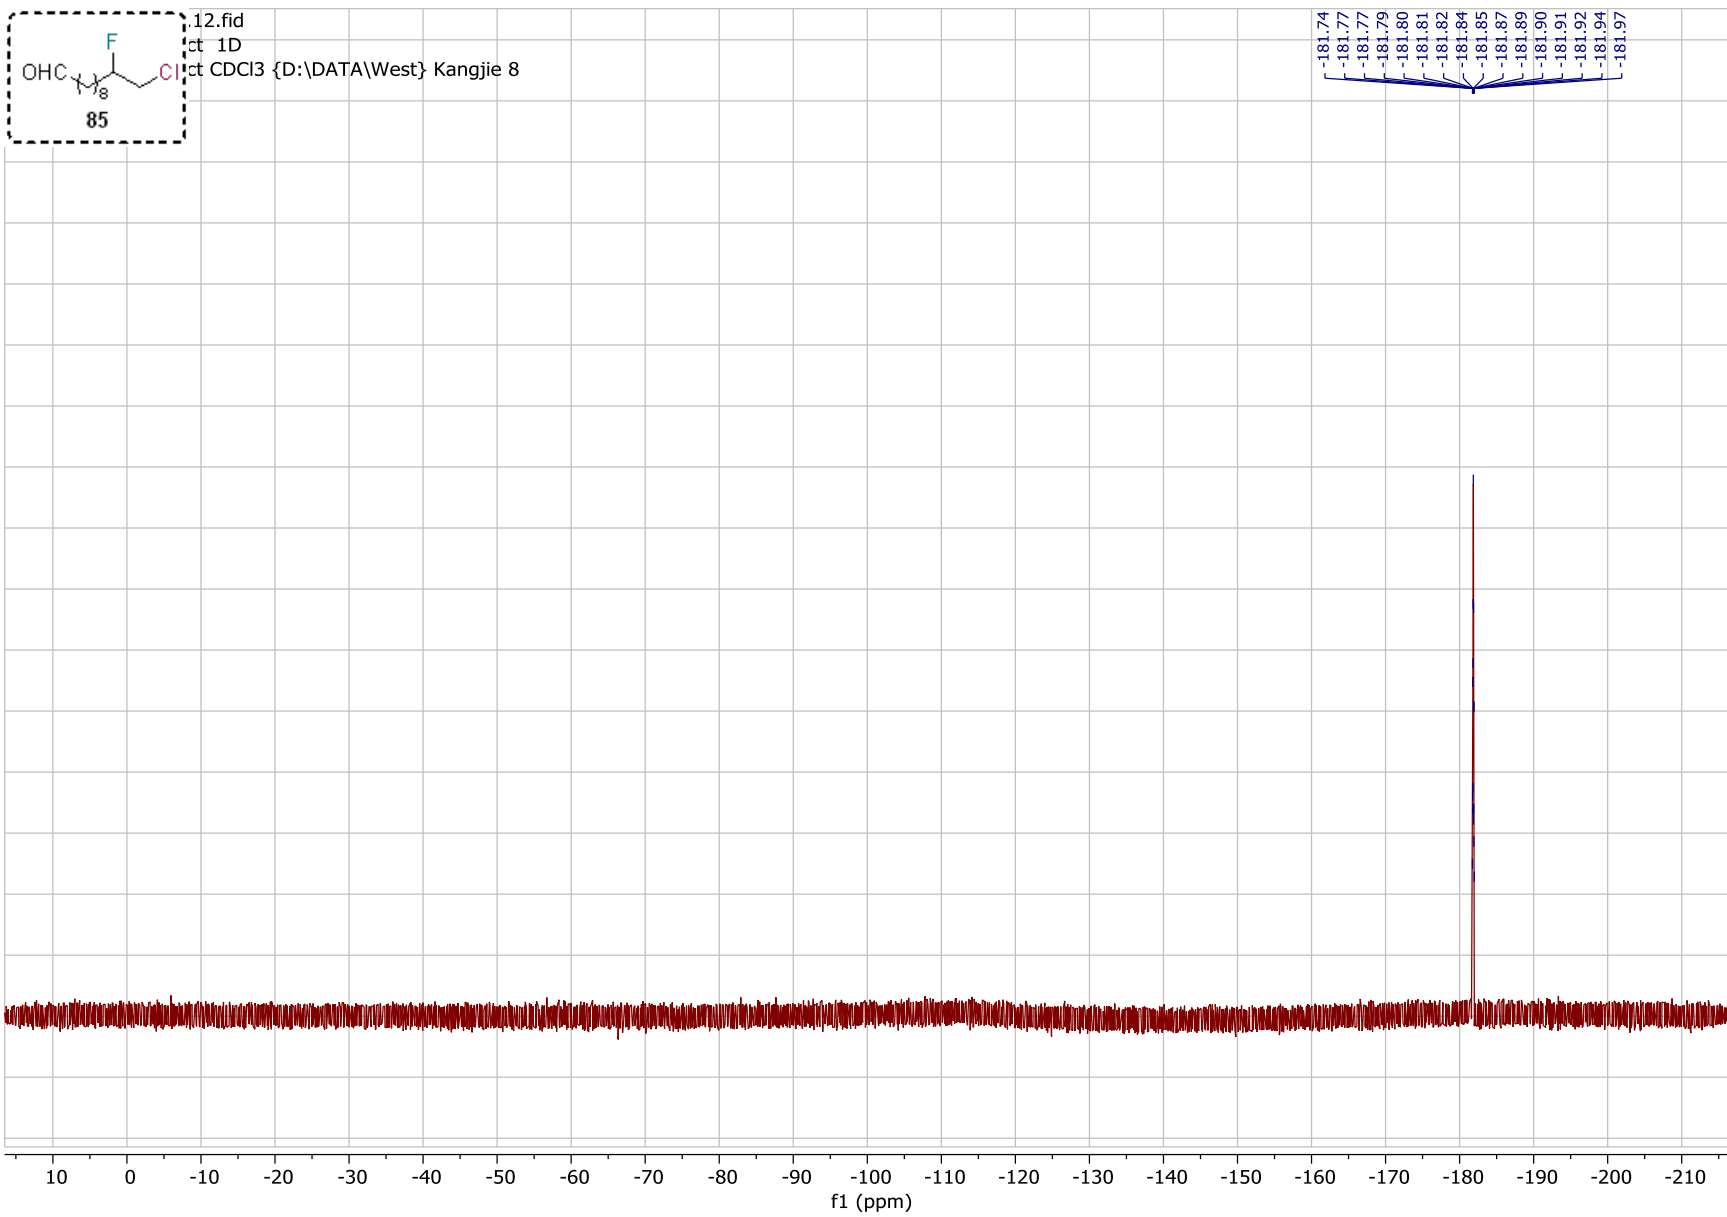

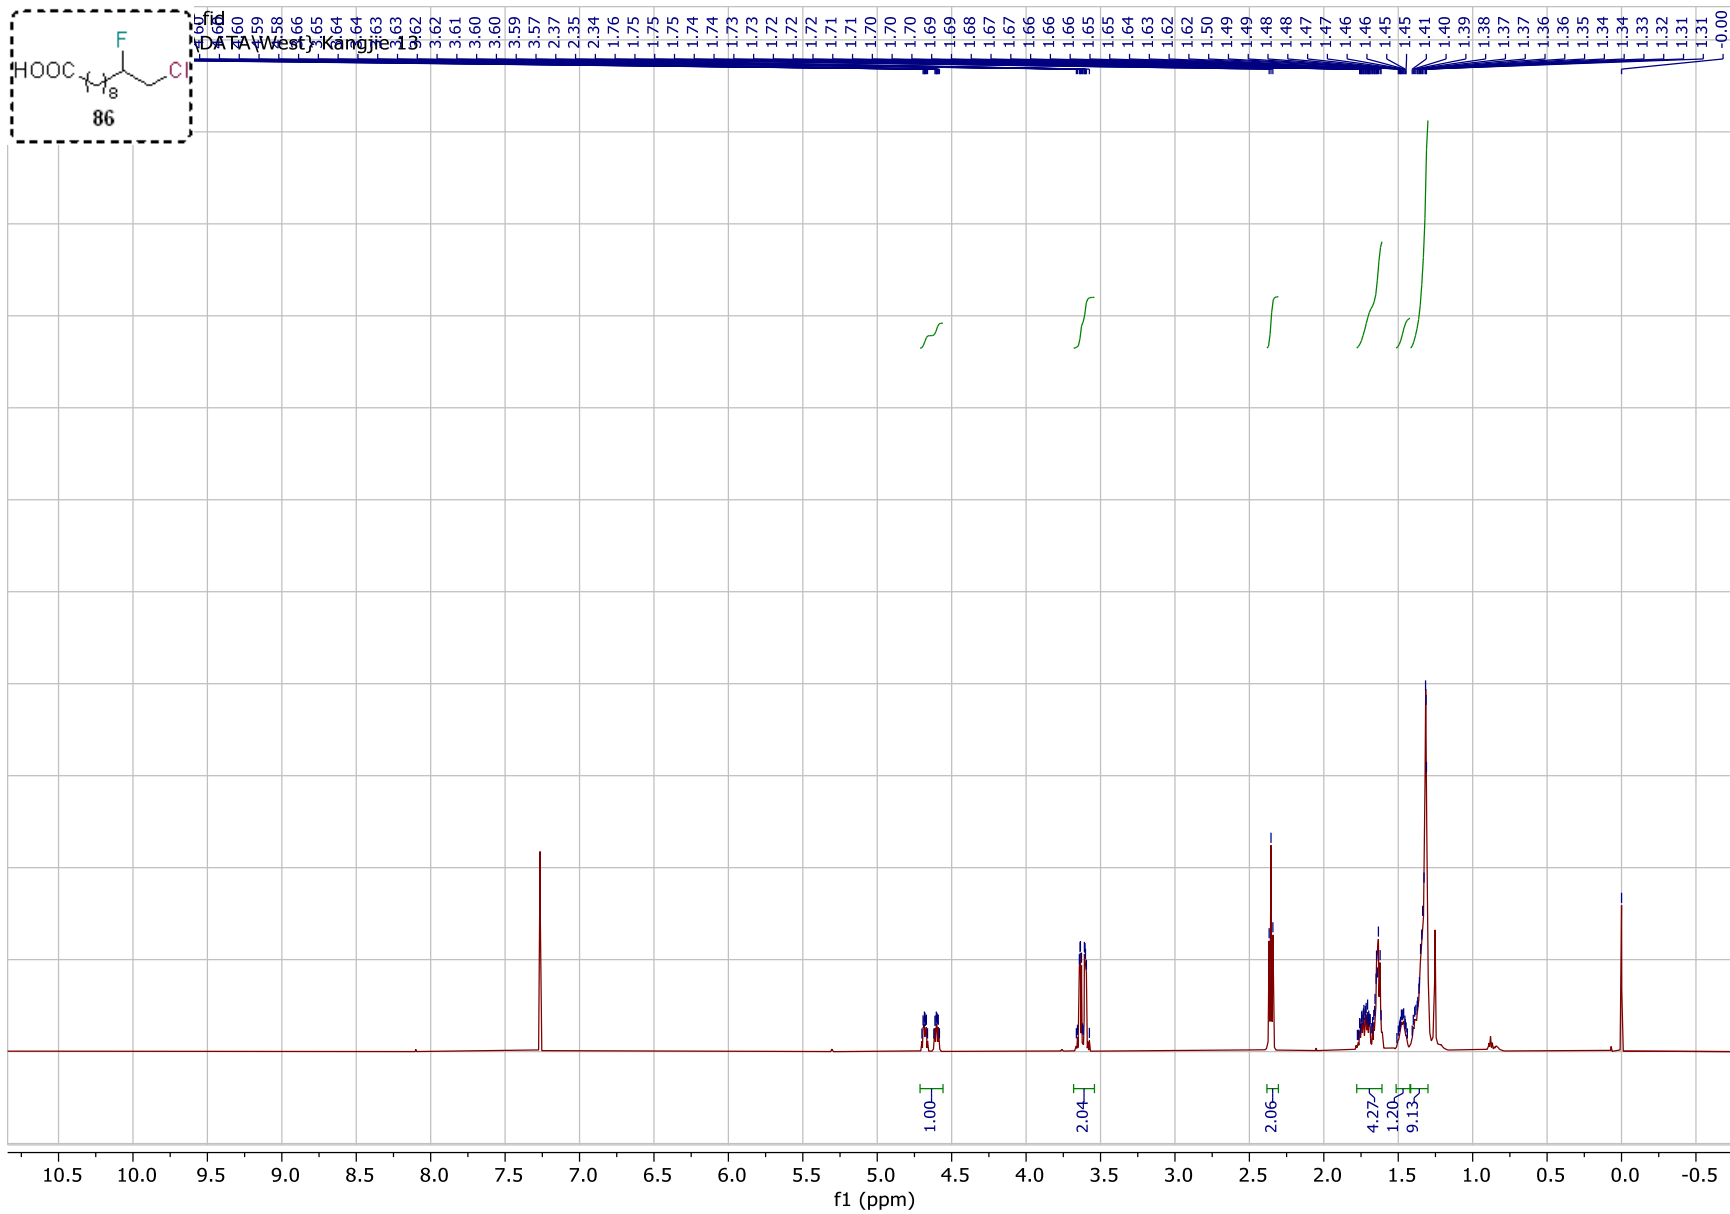

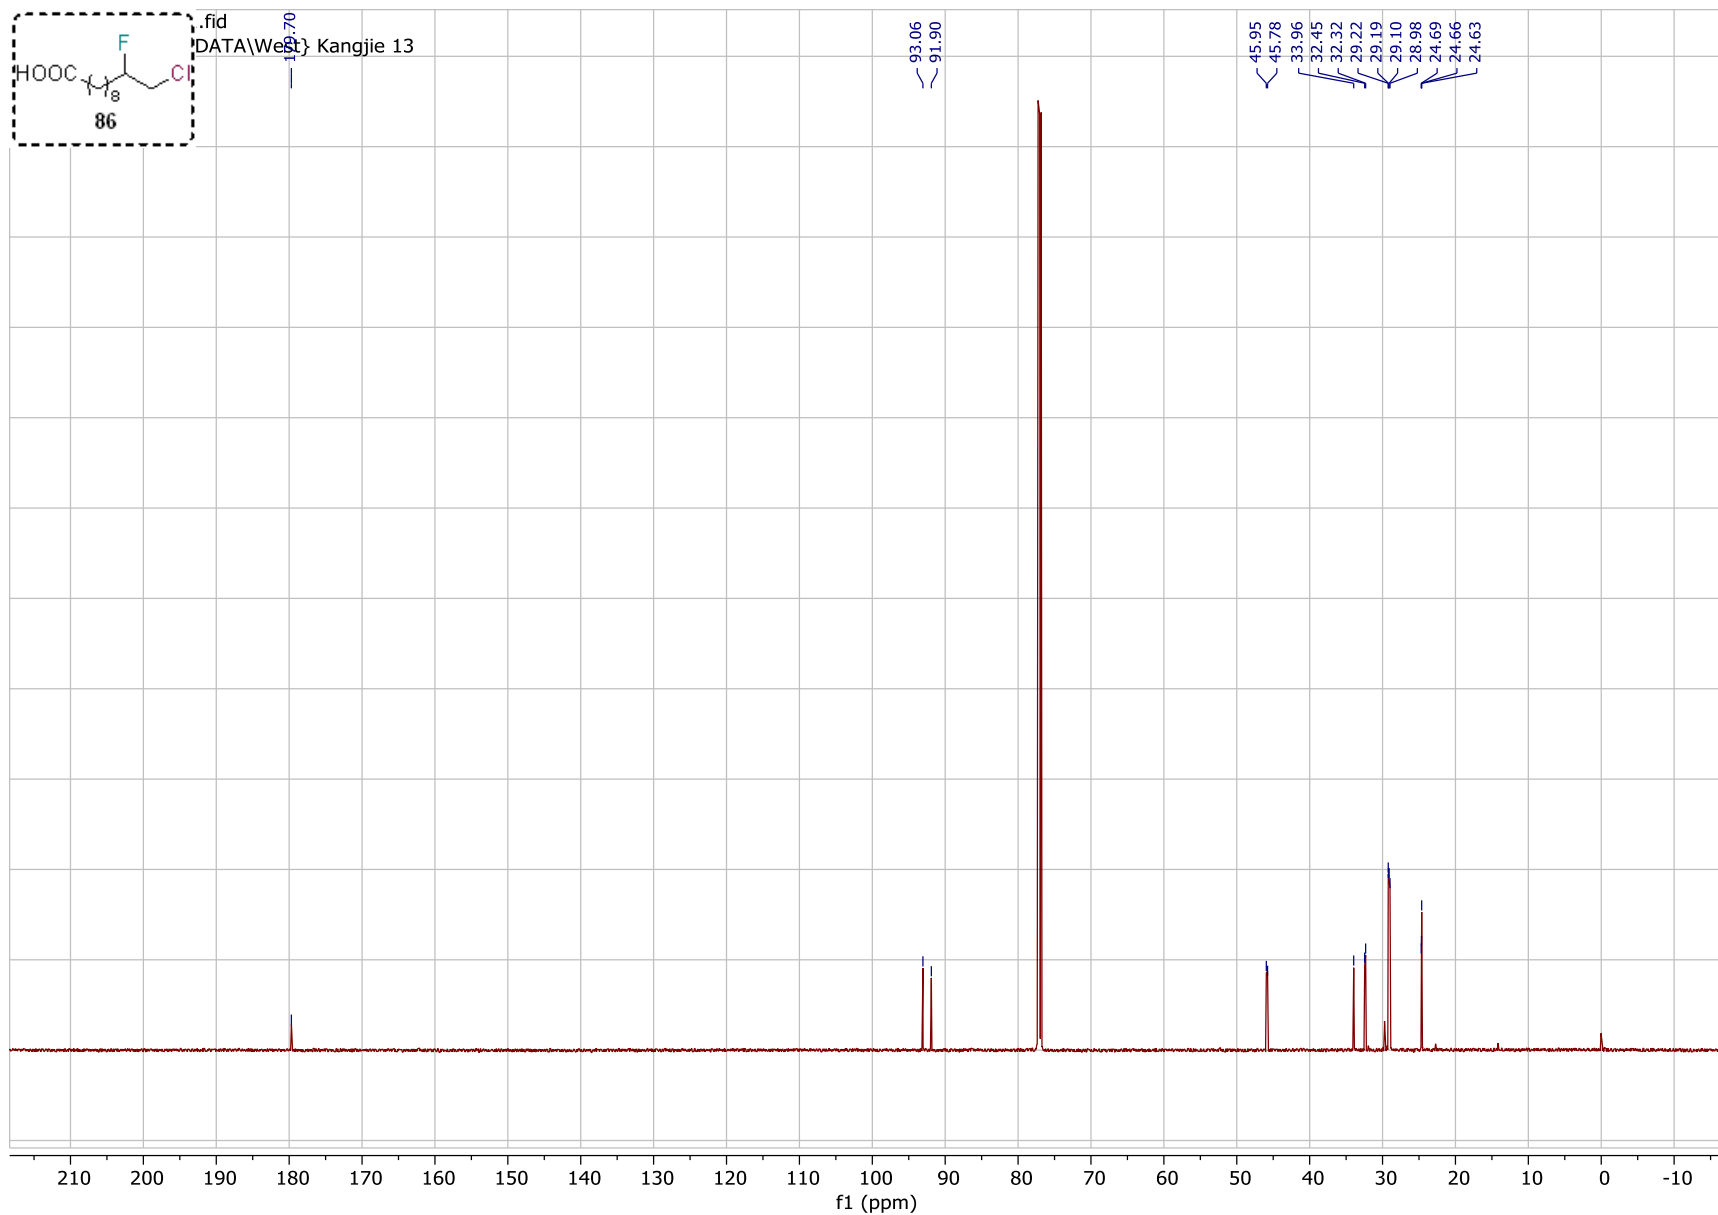

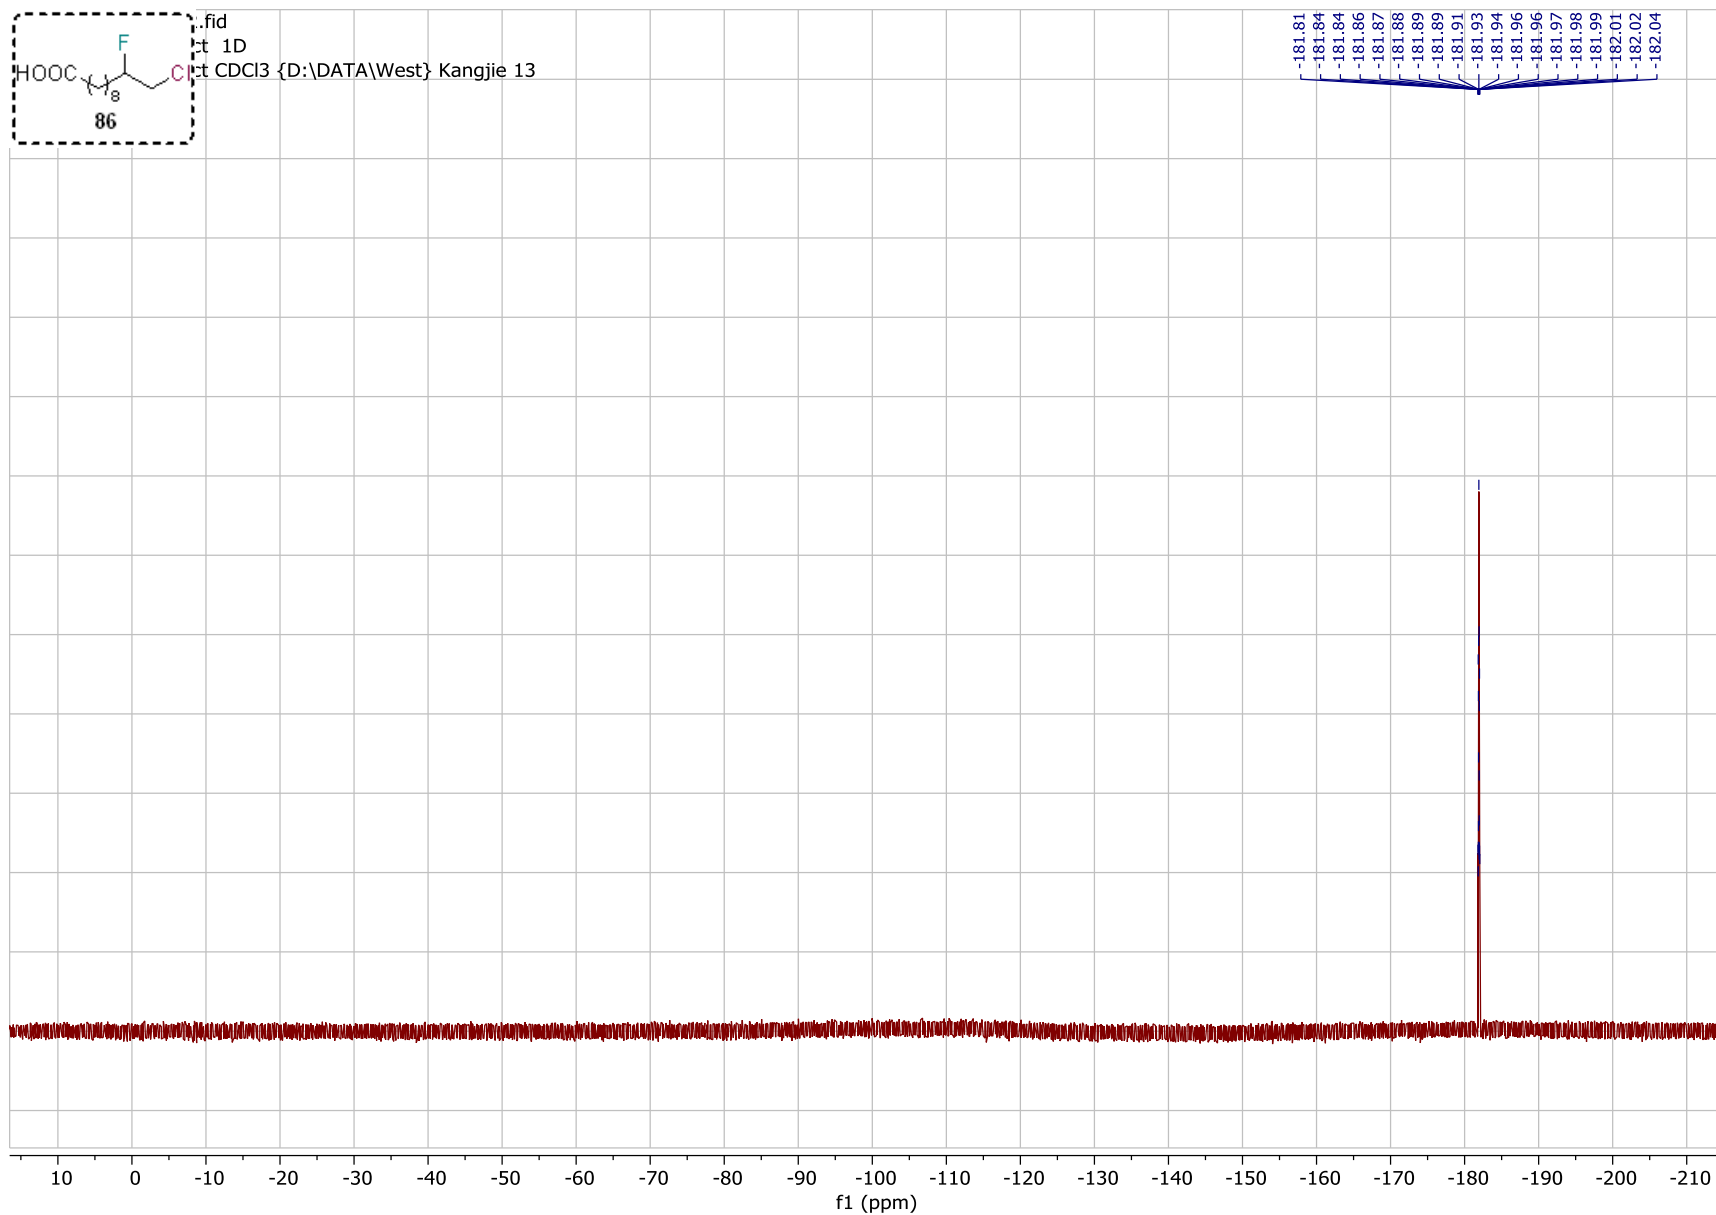

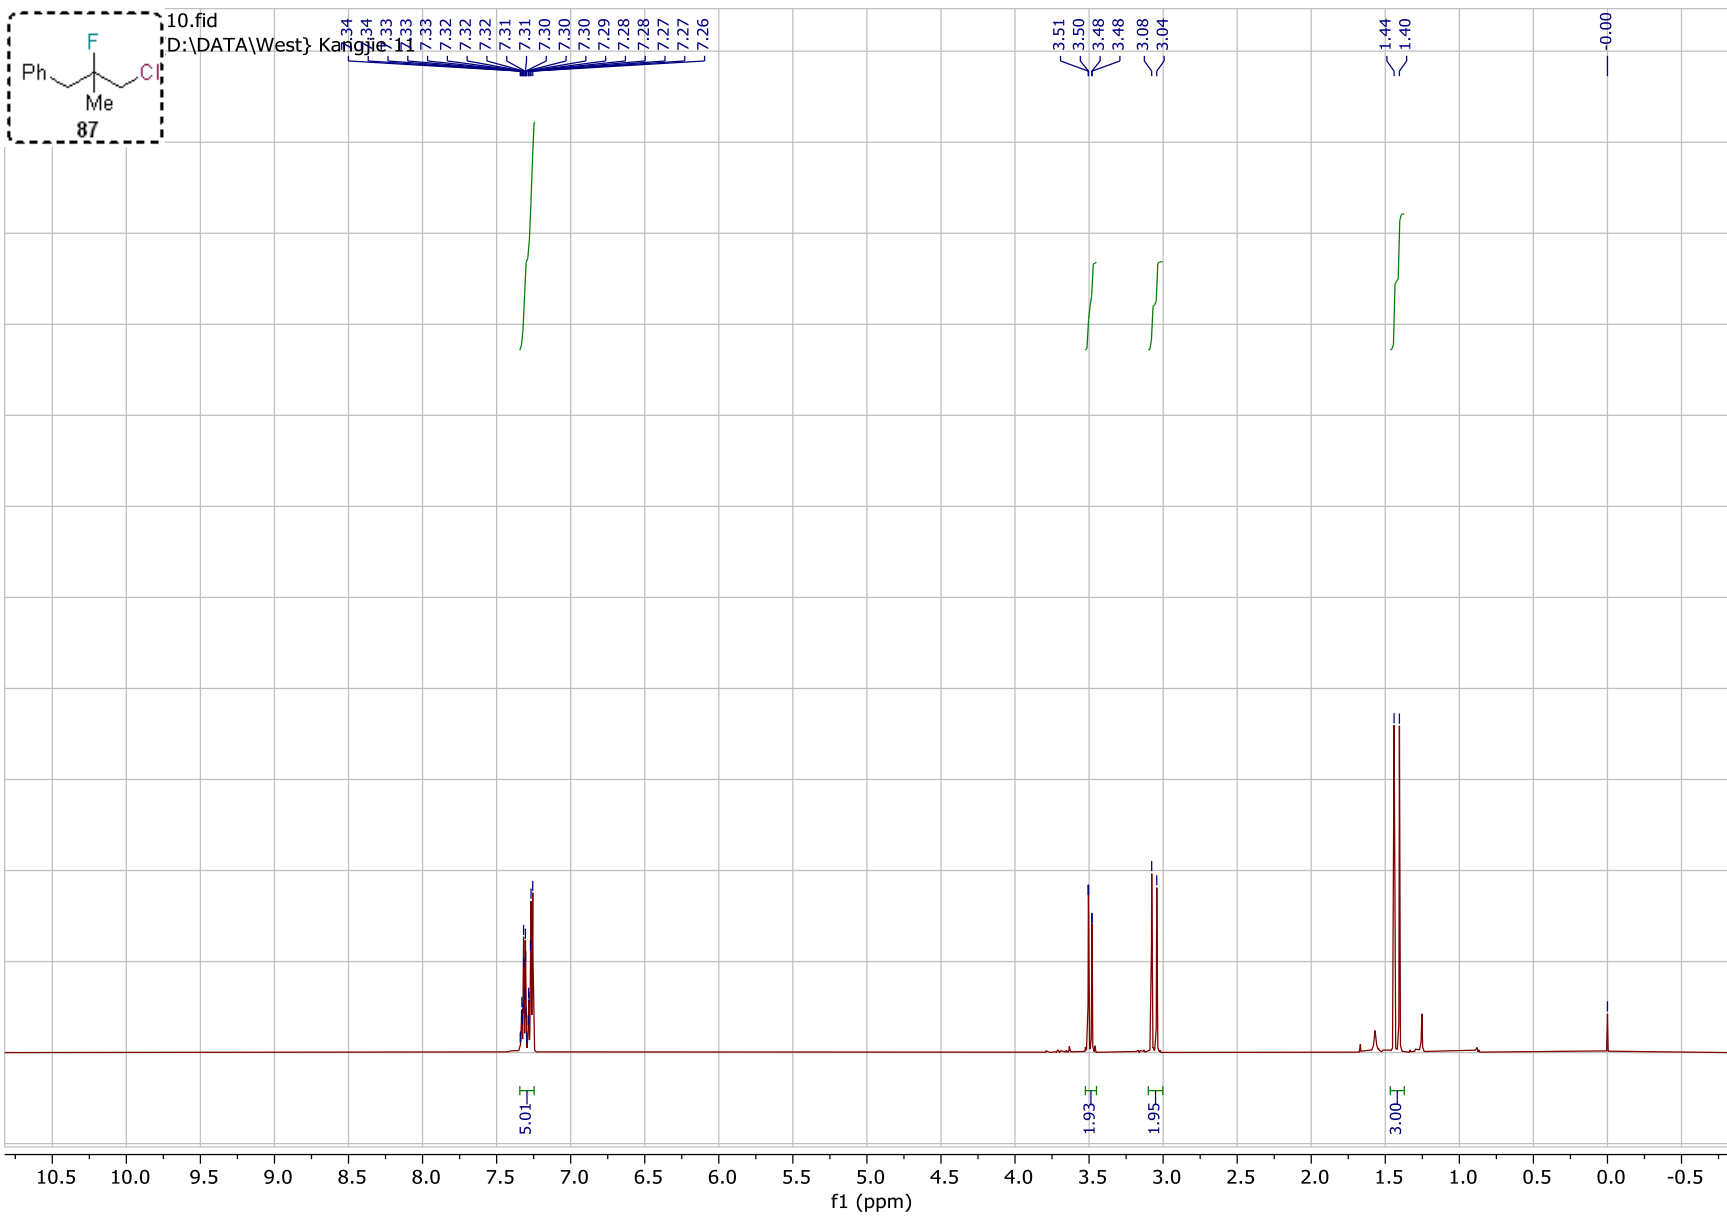

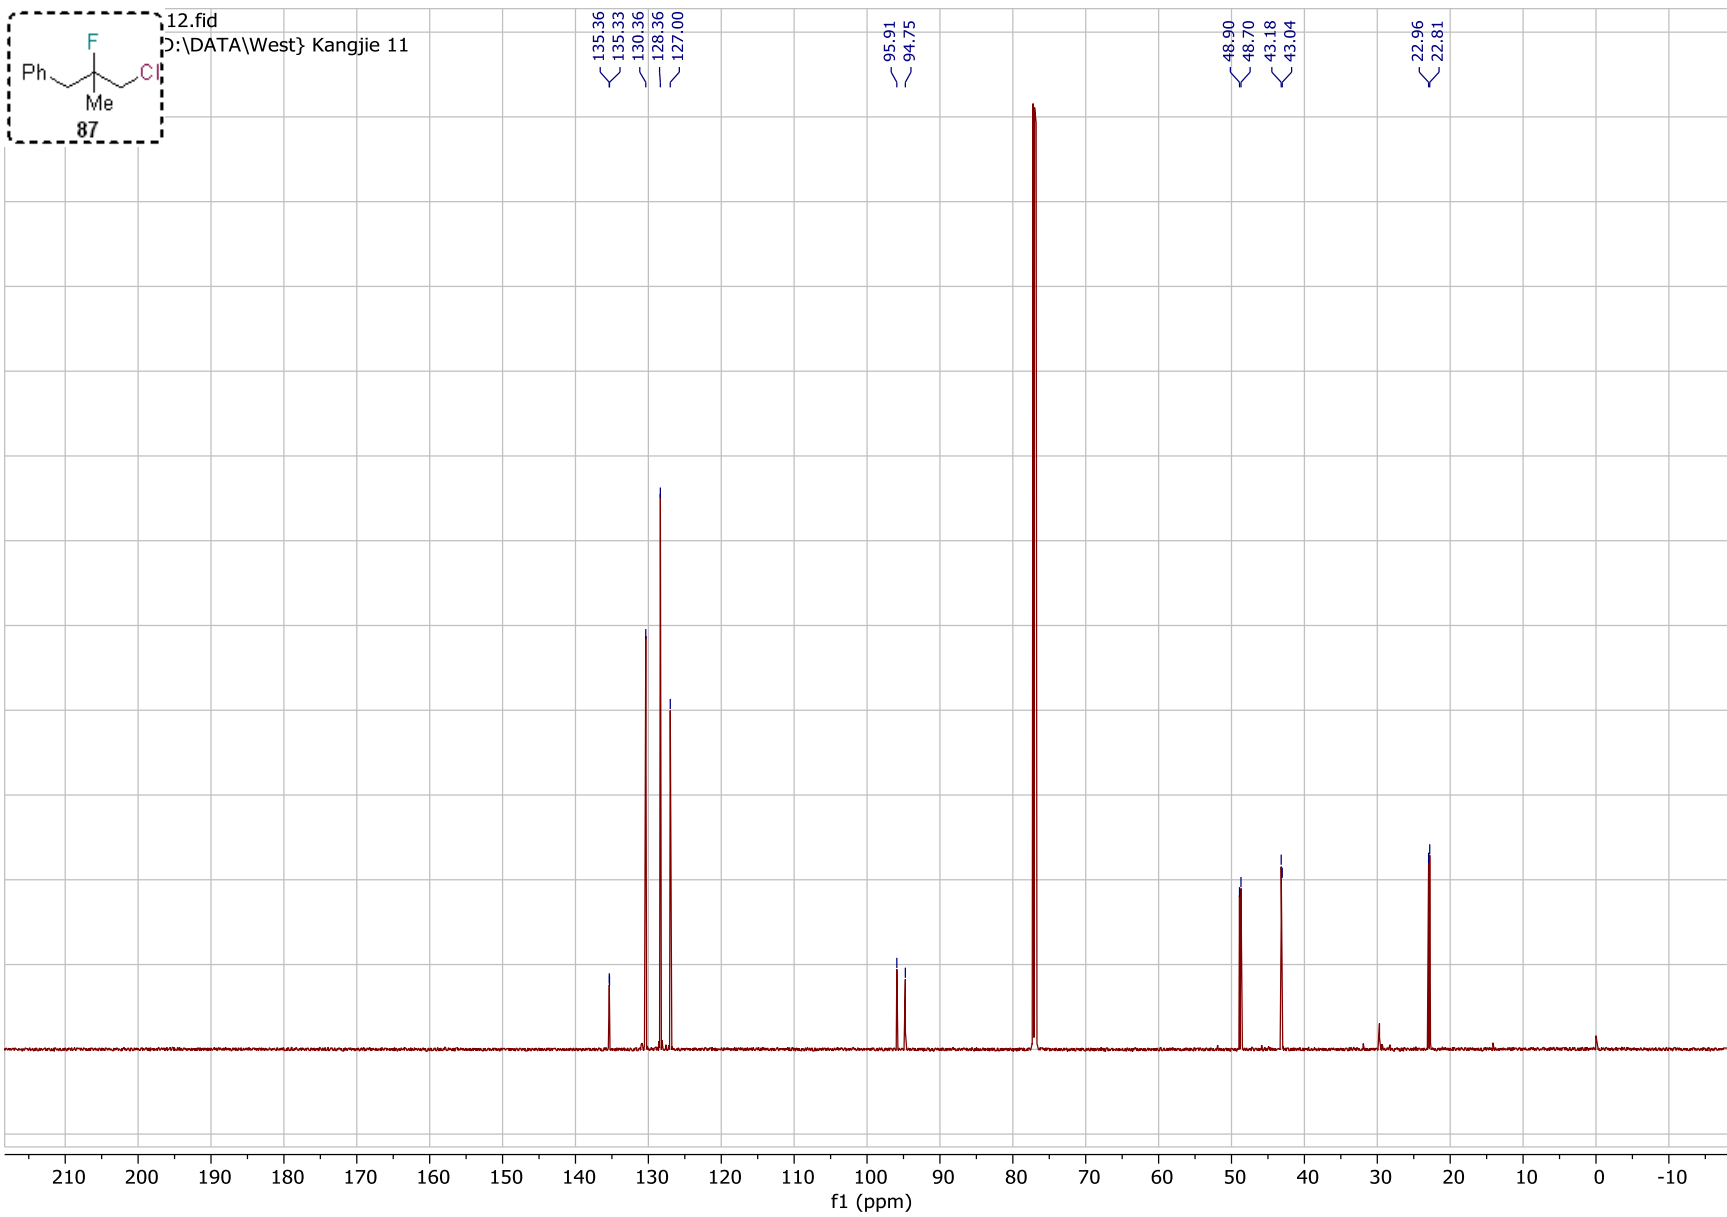



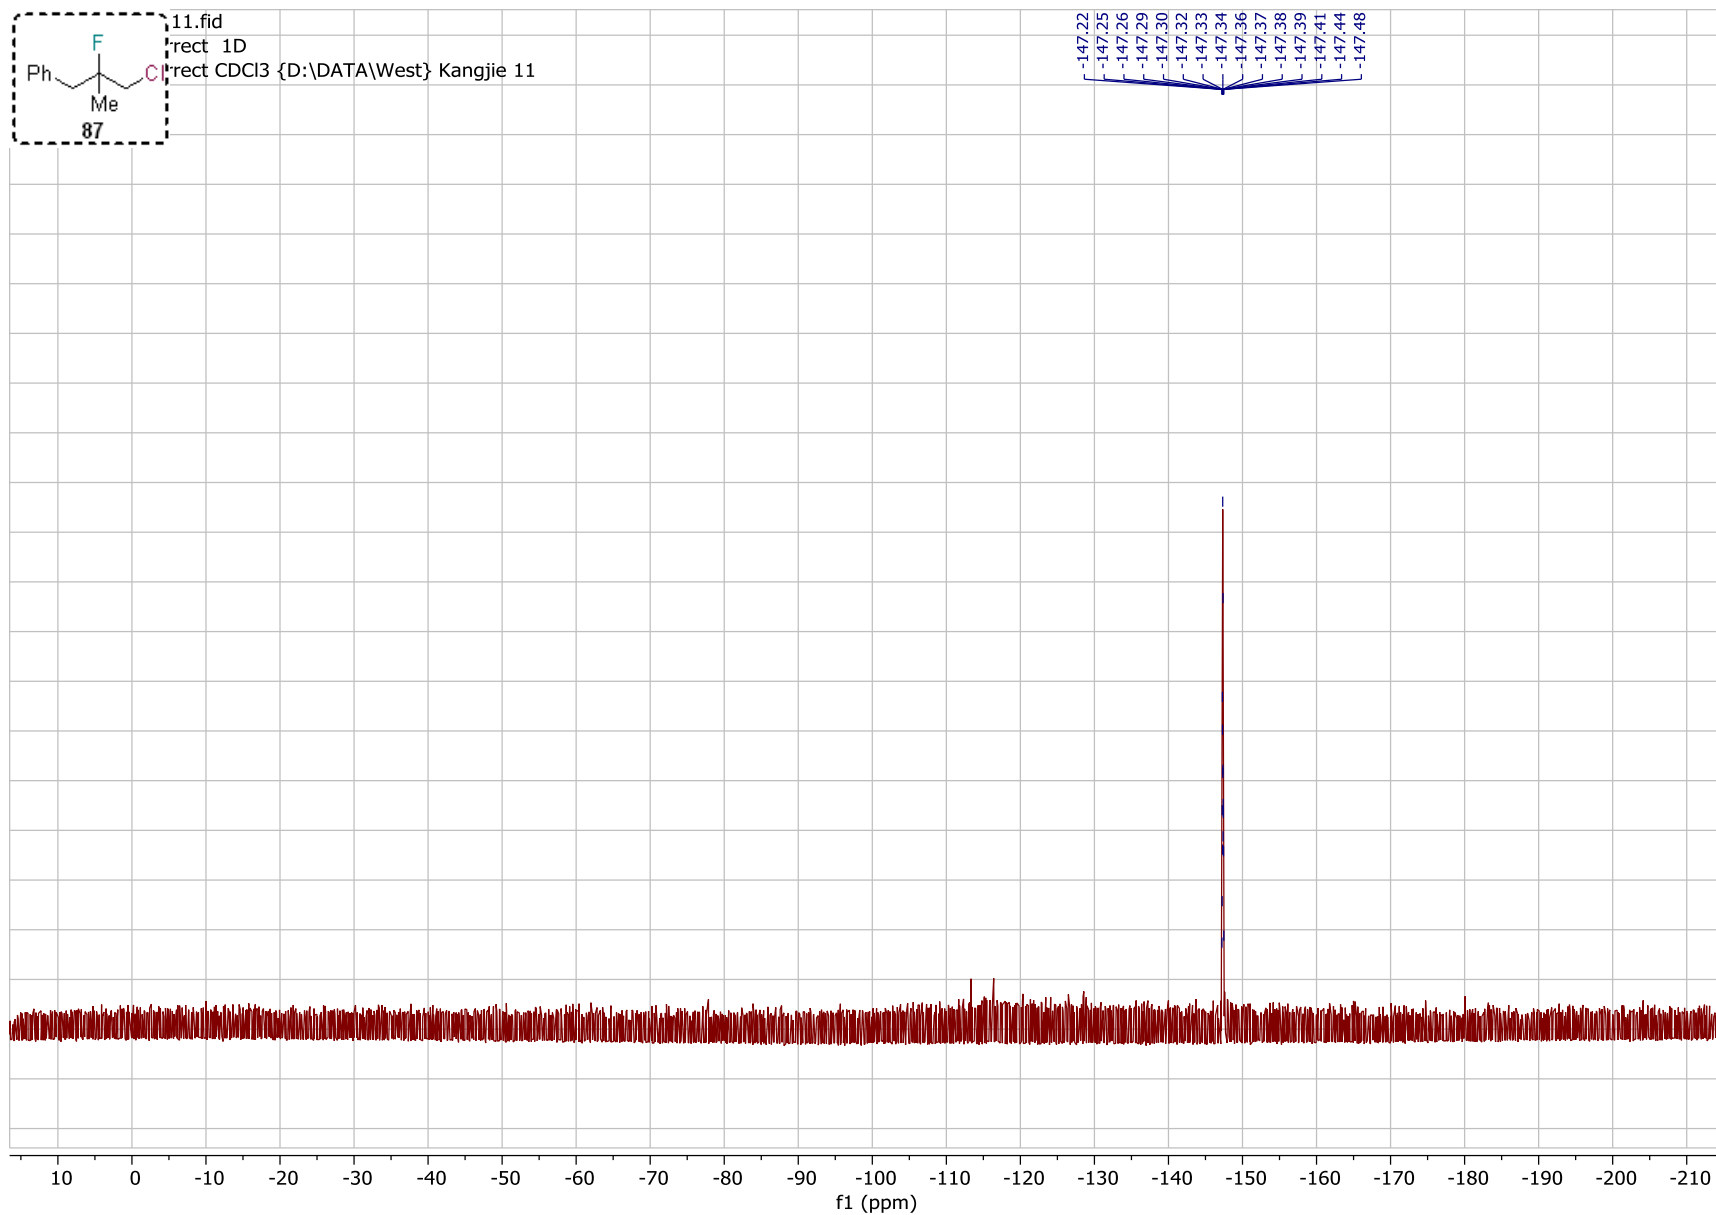

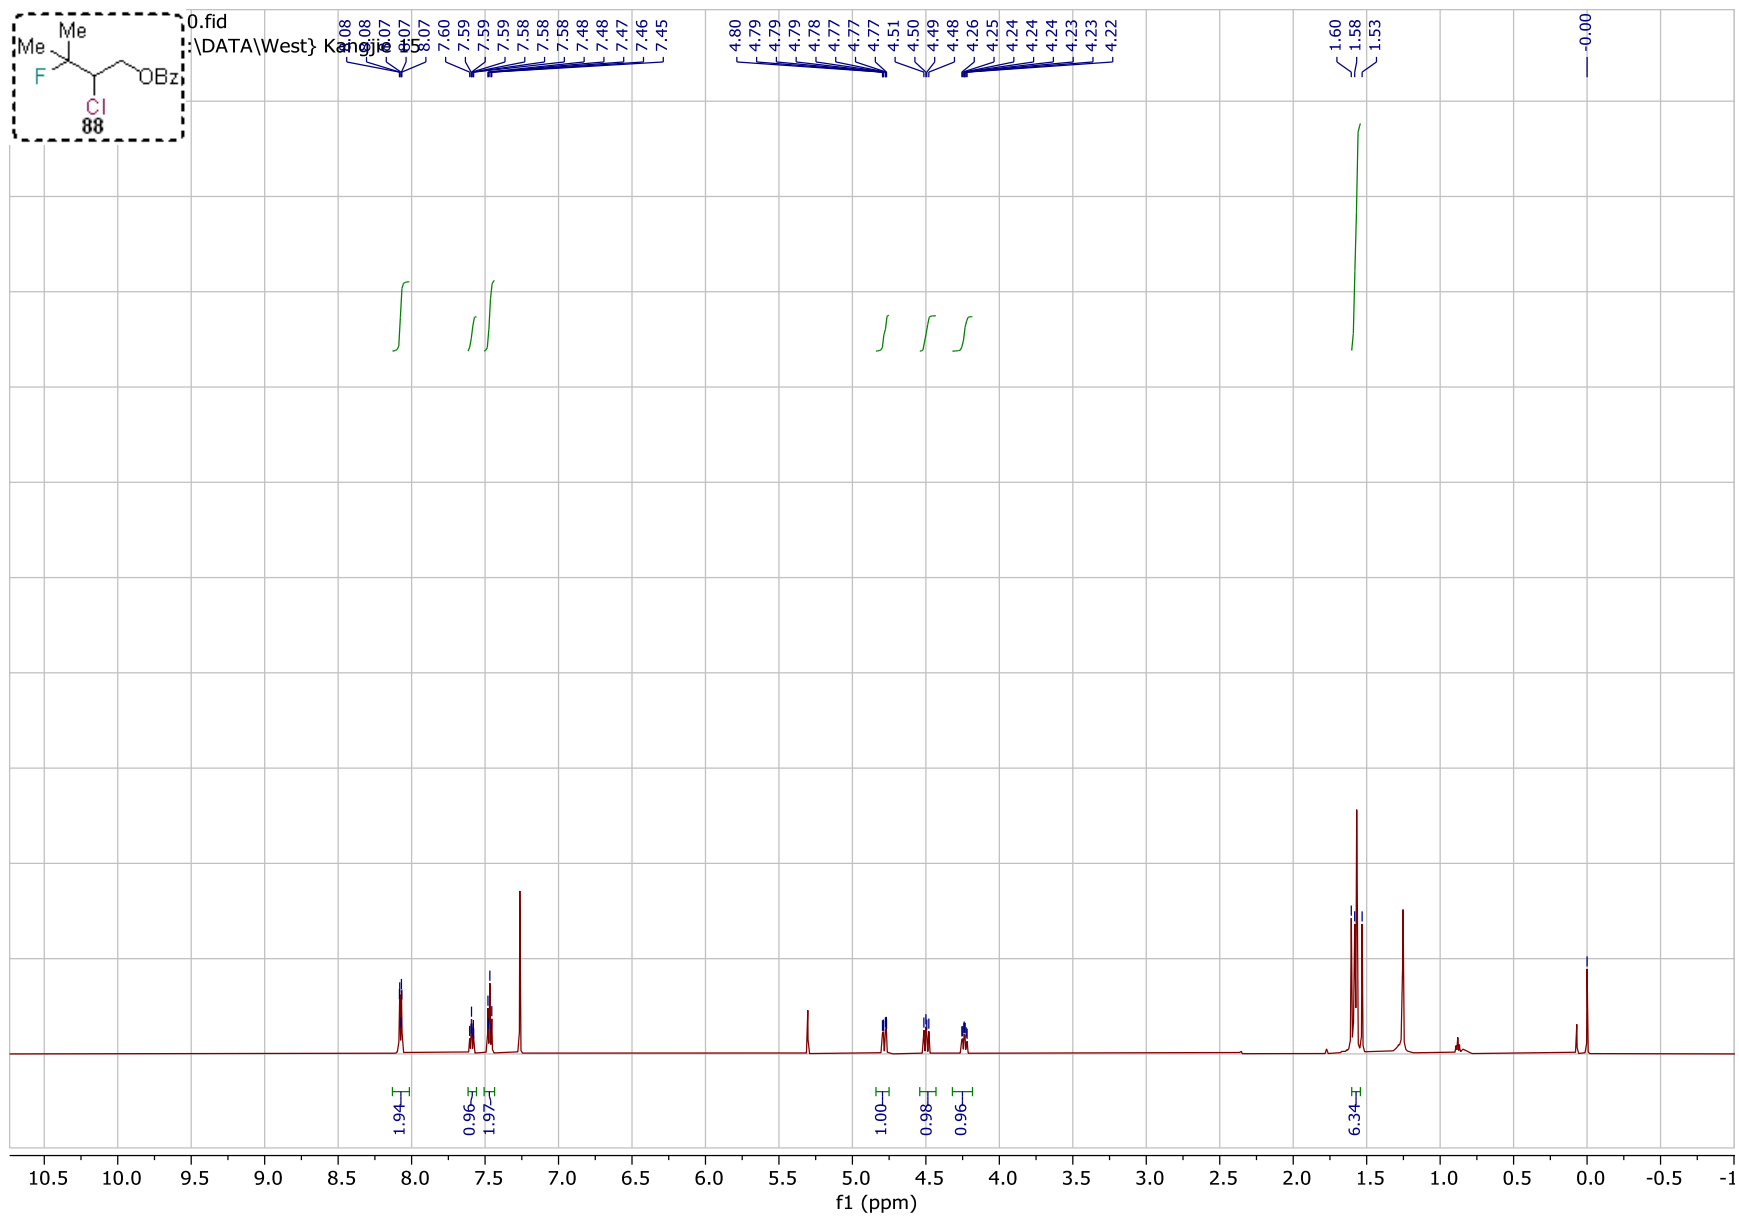

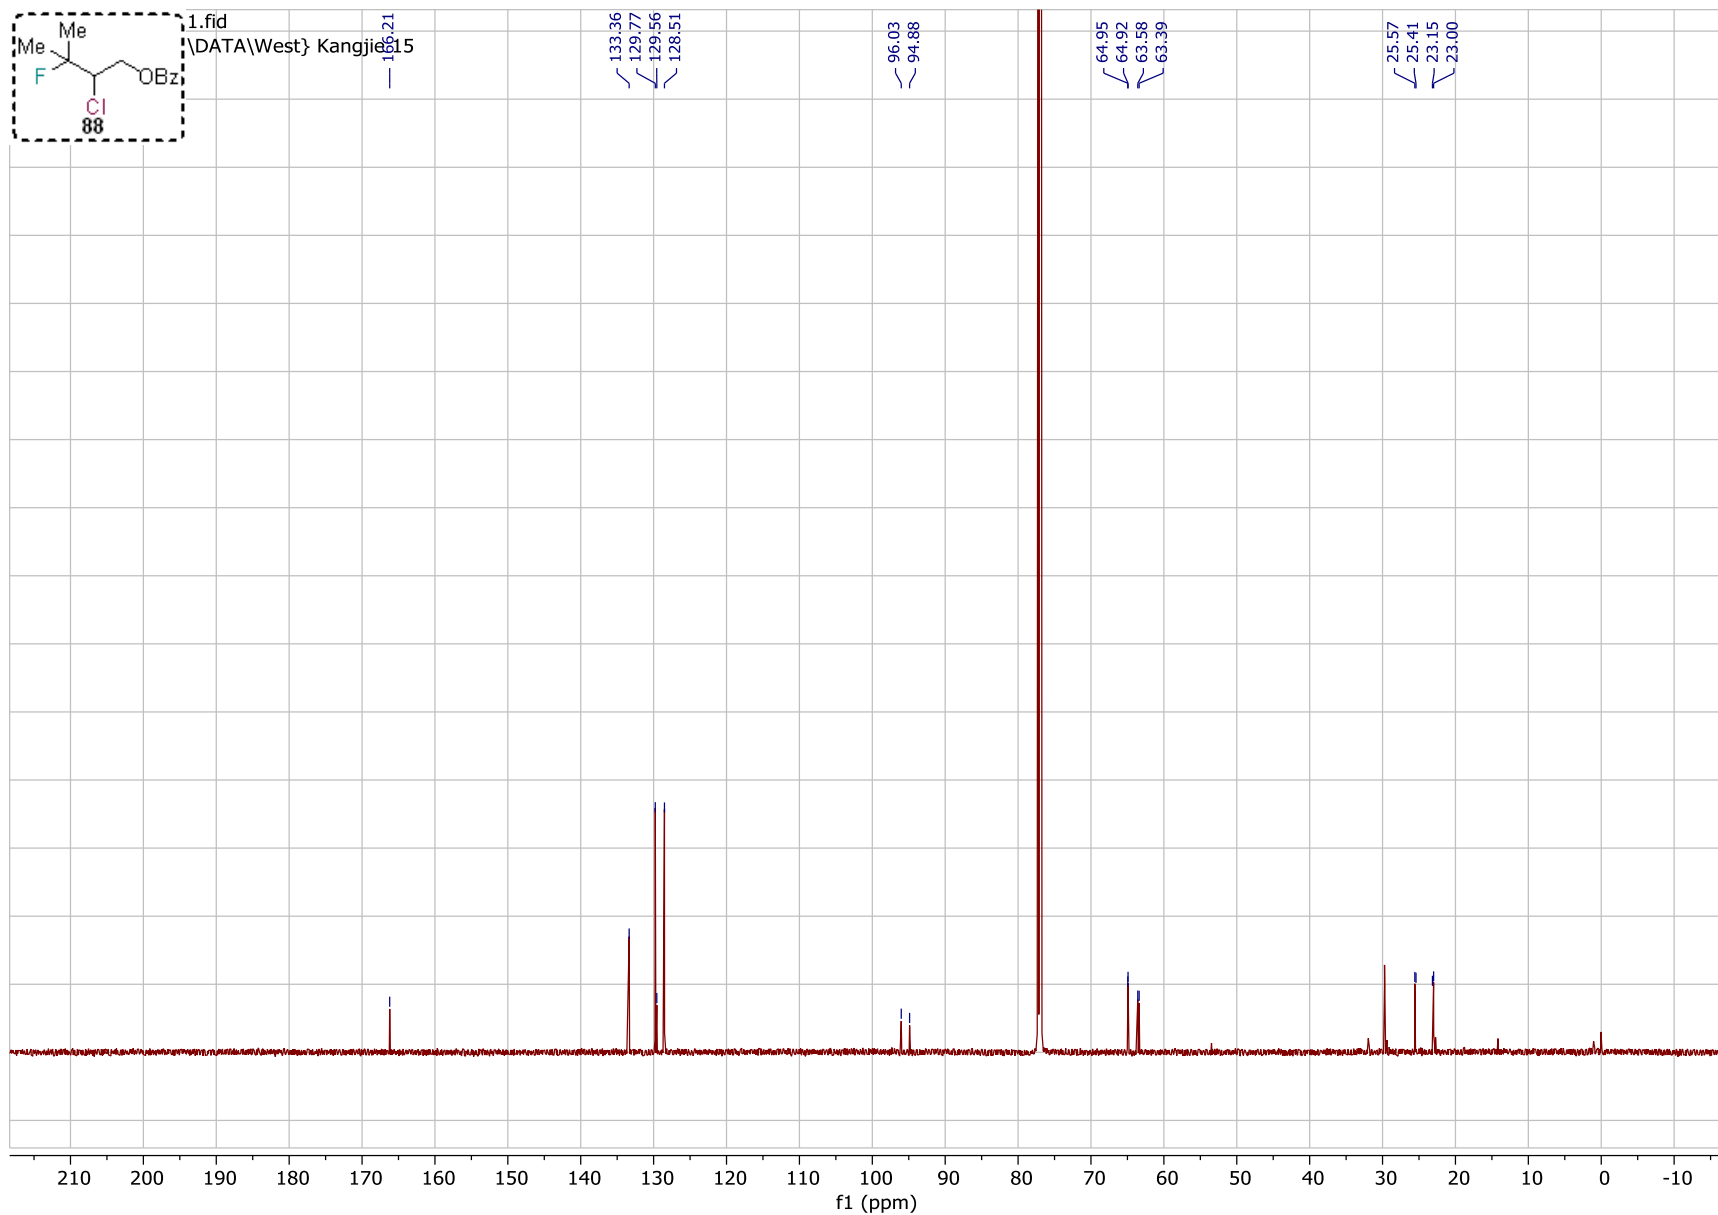

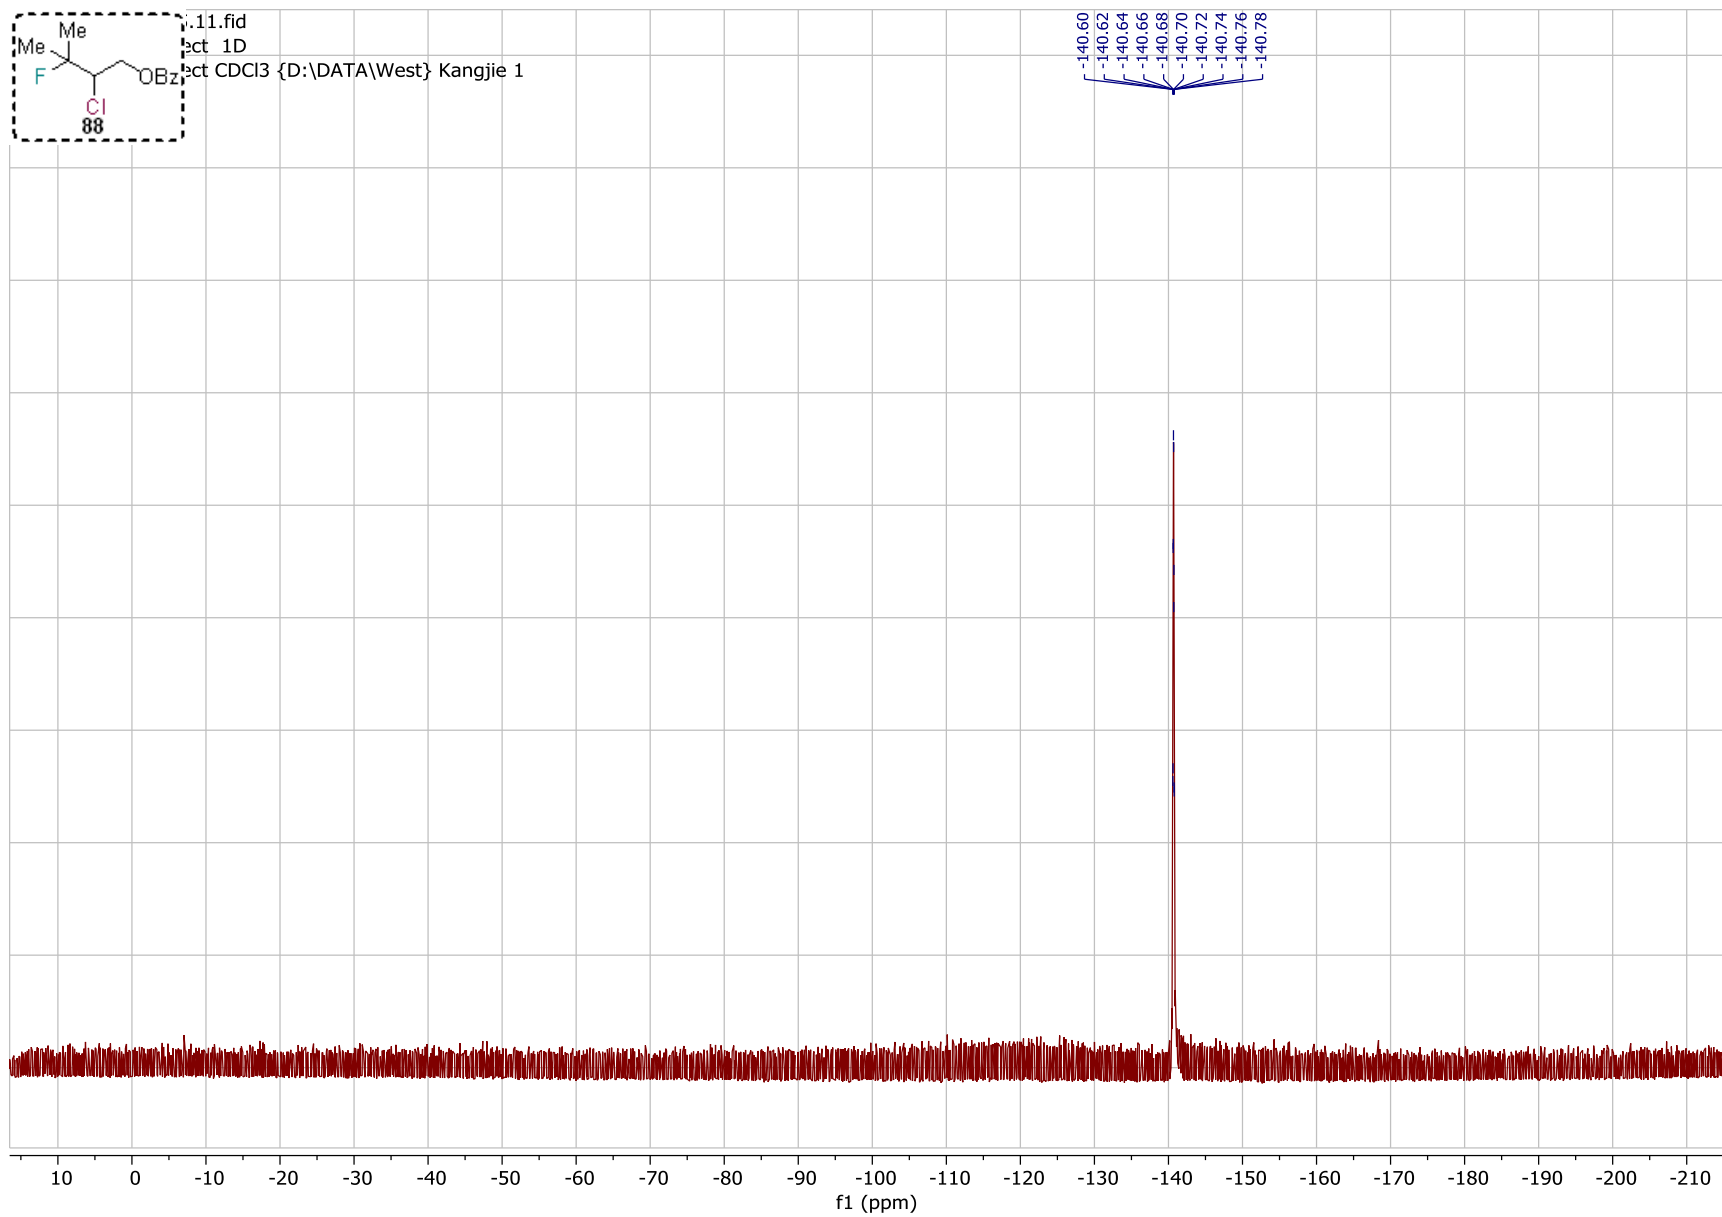

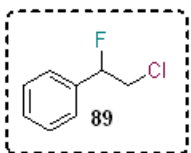

.fid

DATA\West\ Kangjie

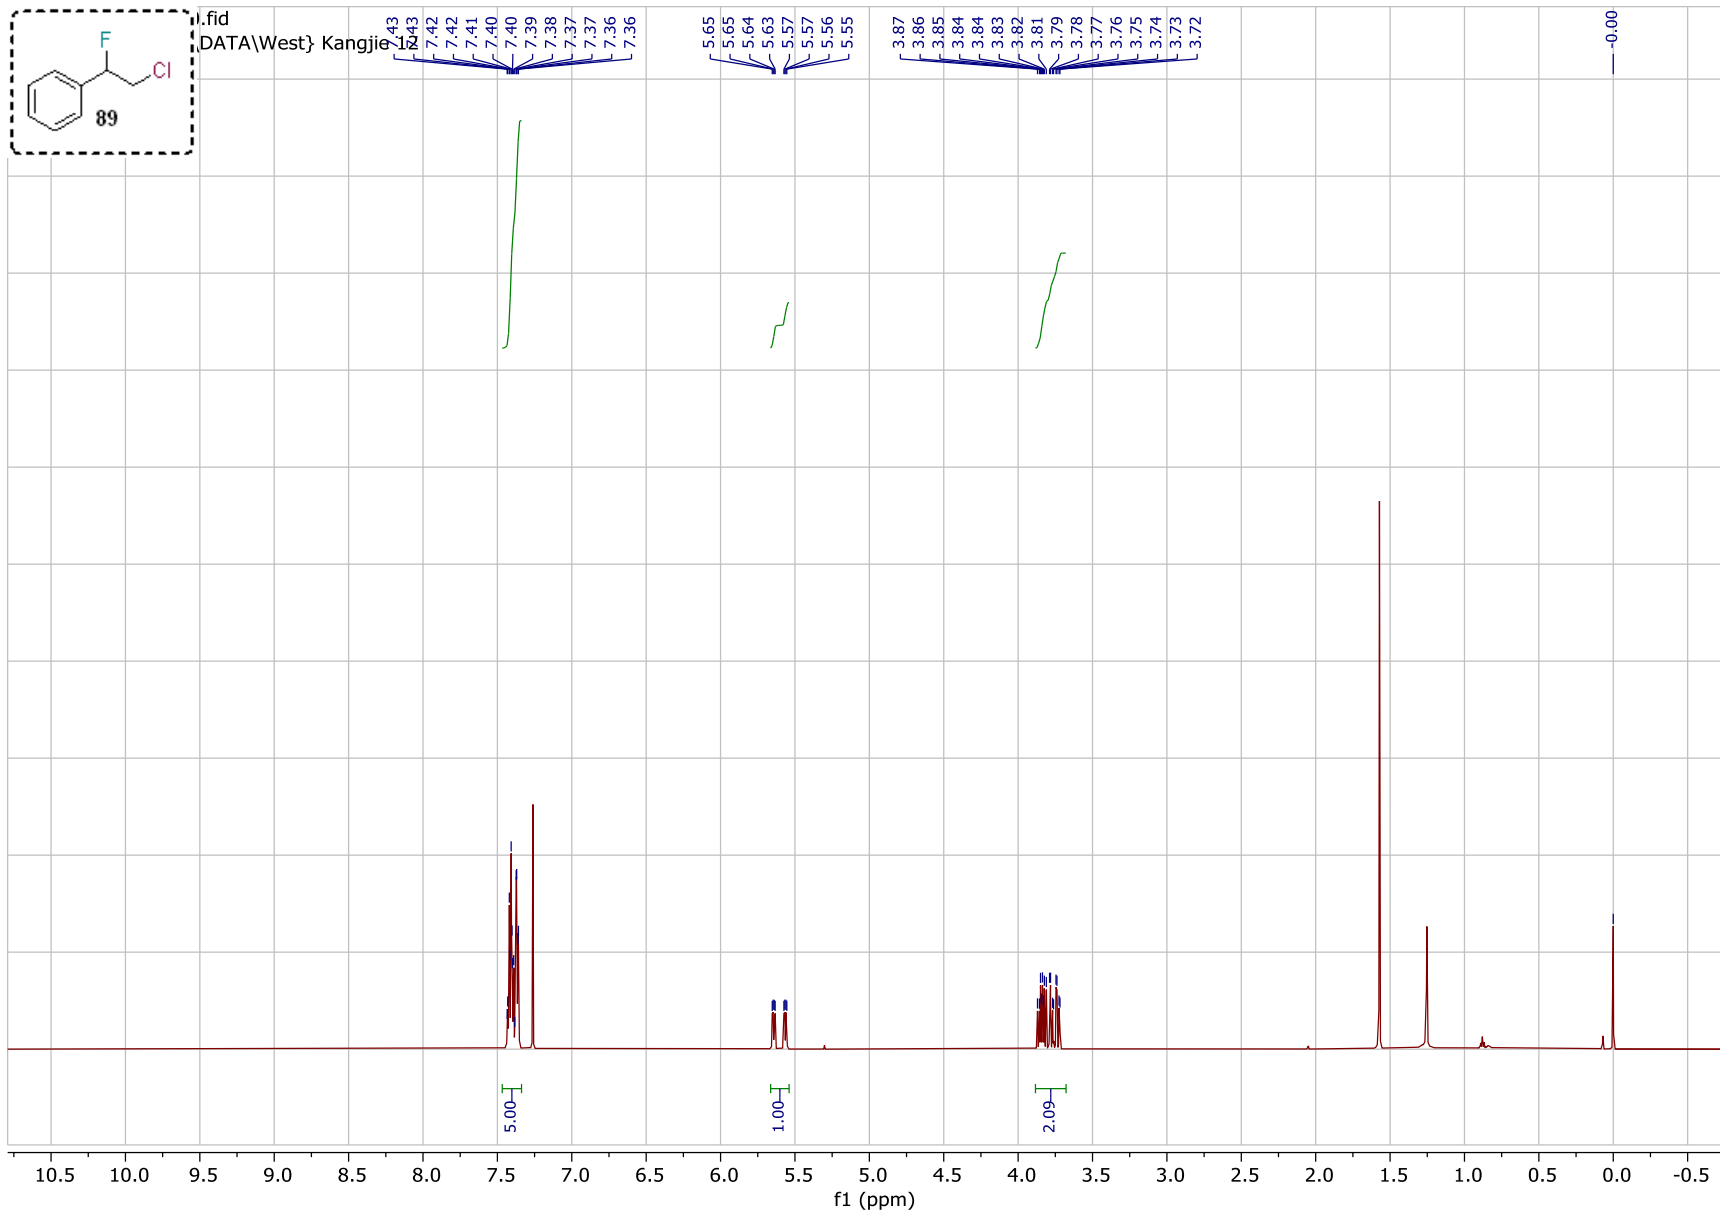

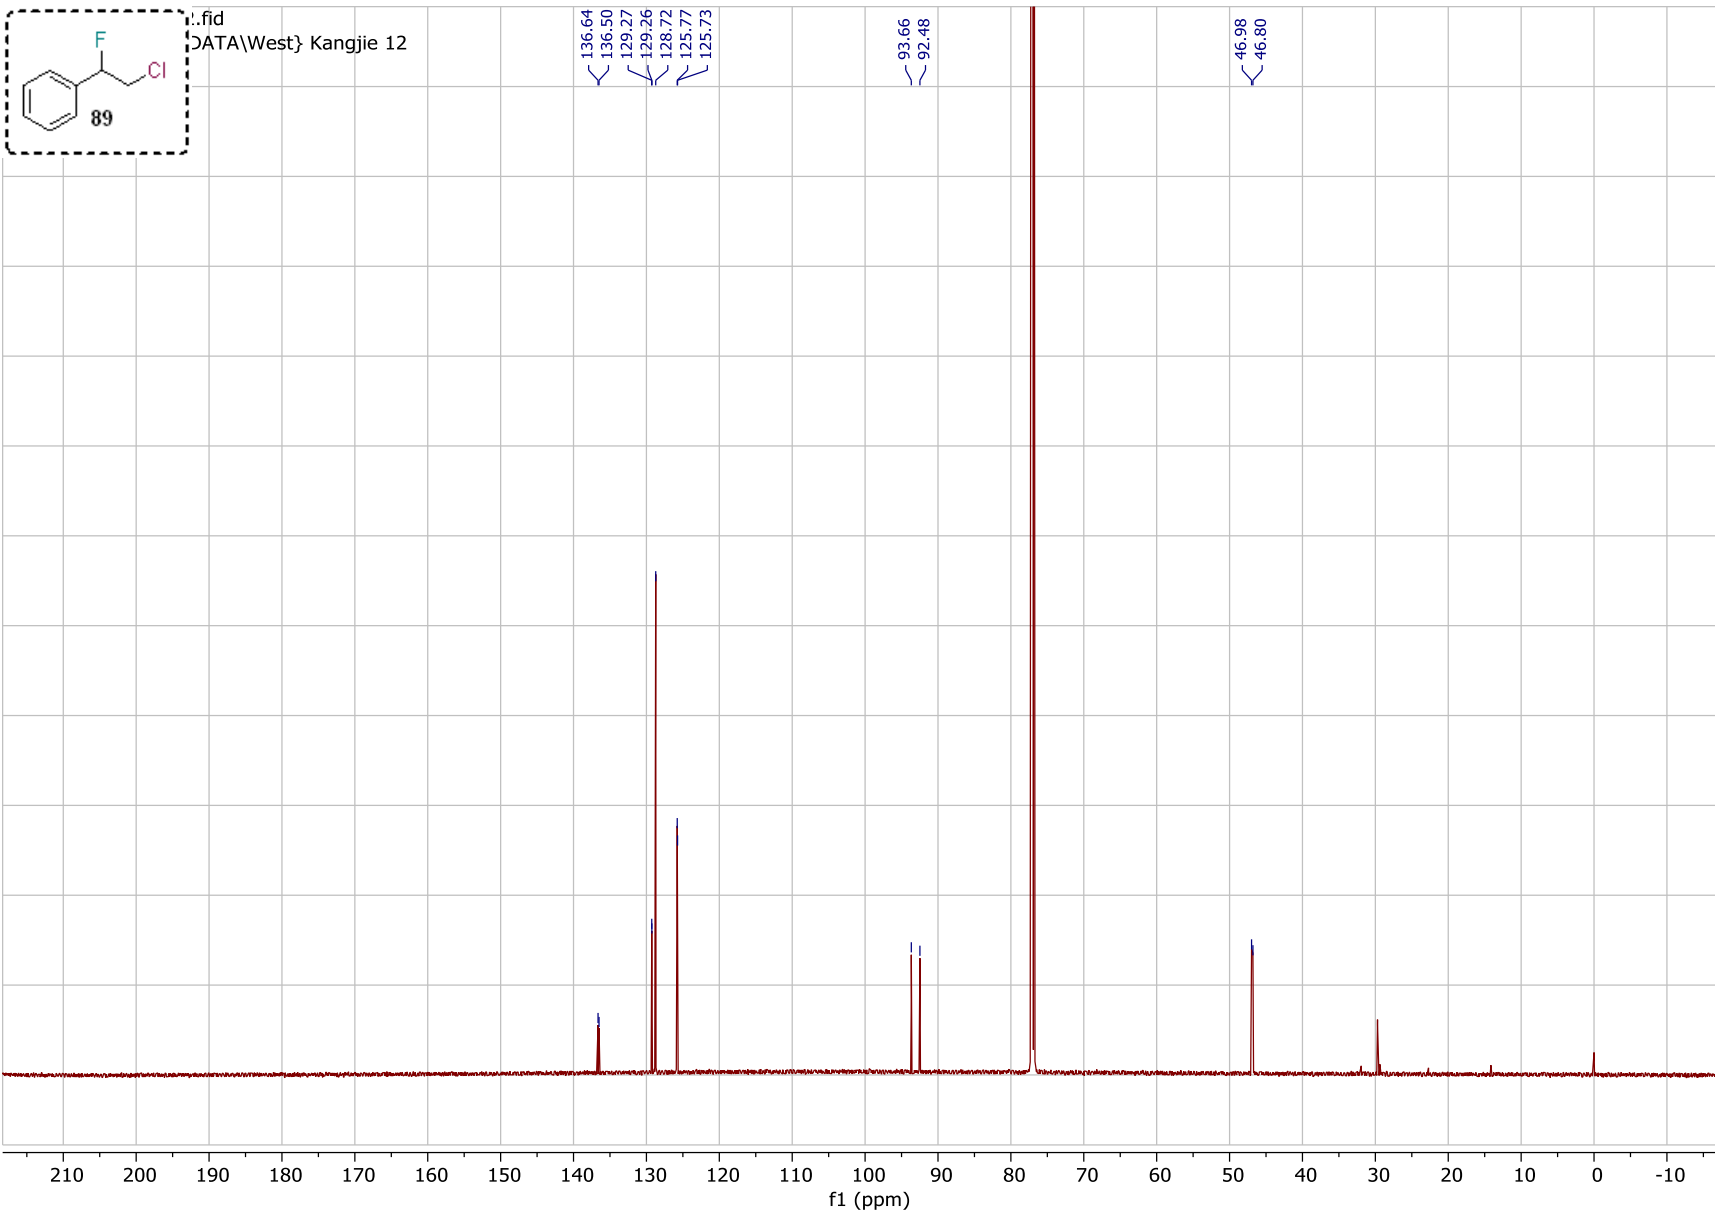



.fid  
t 1D  
t CDCl3 {D:\DATA\West} Kangjie 12

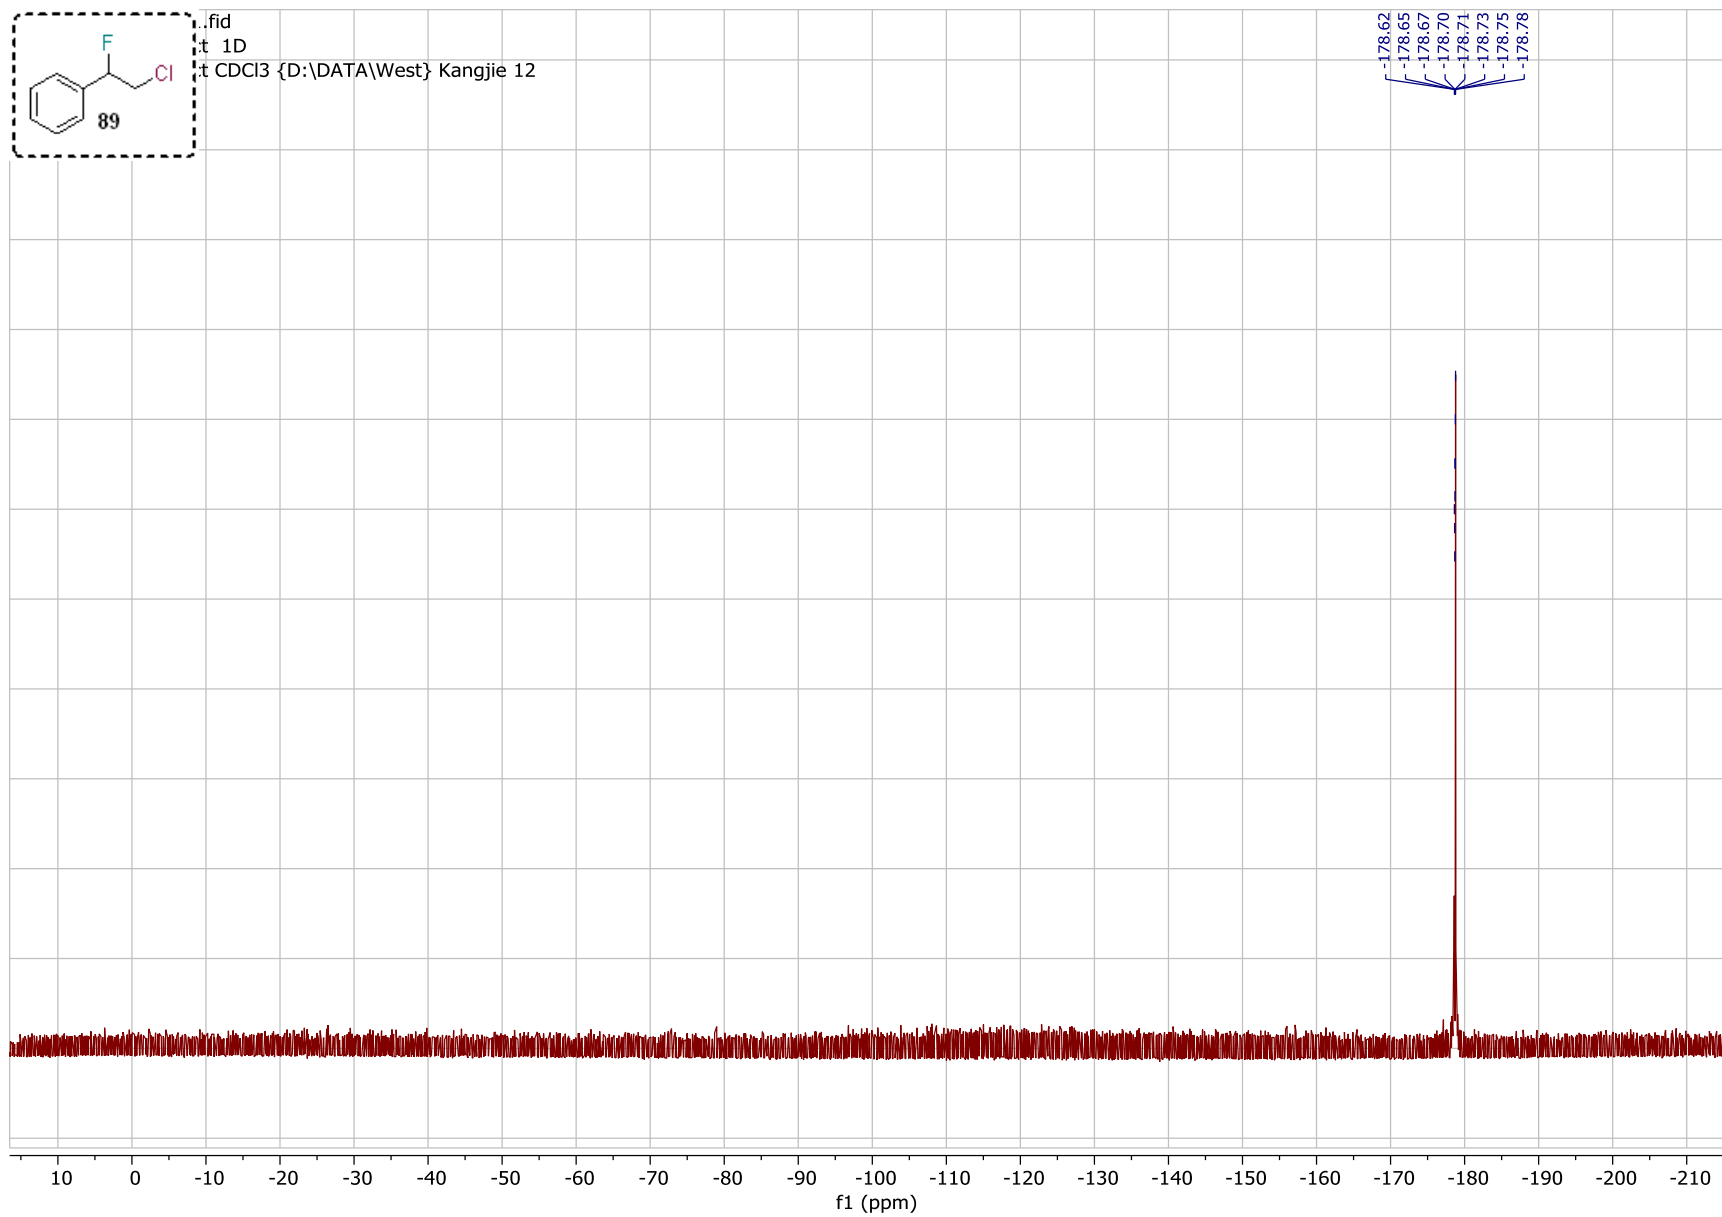

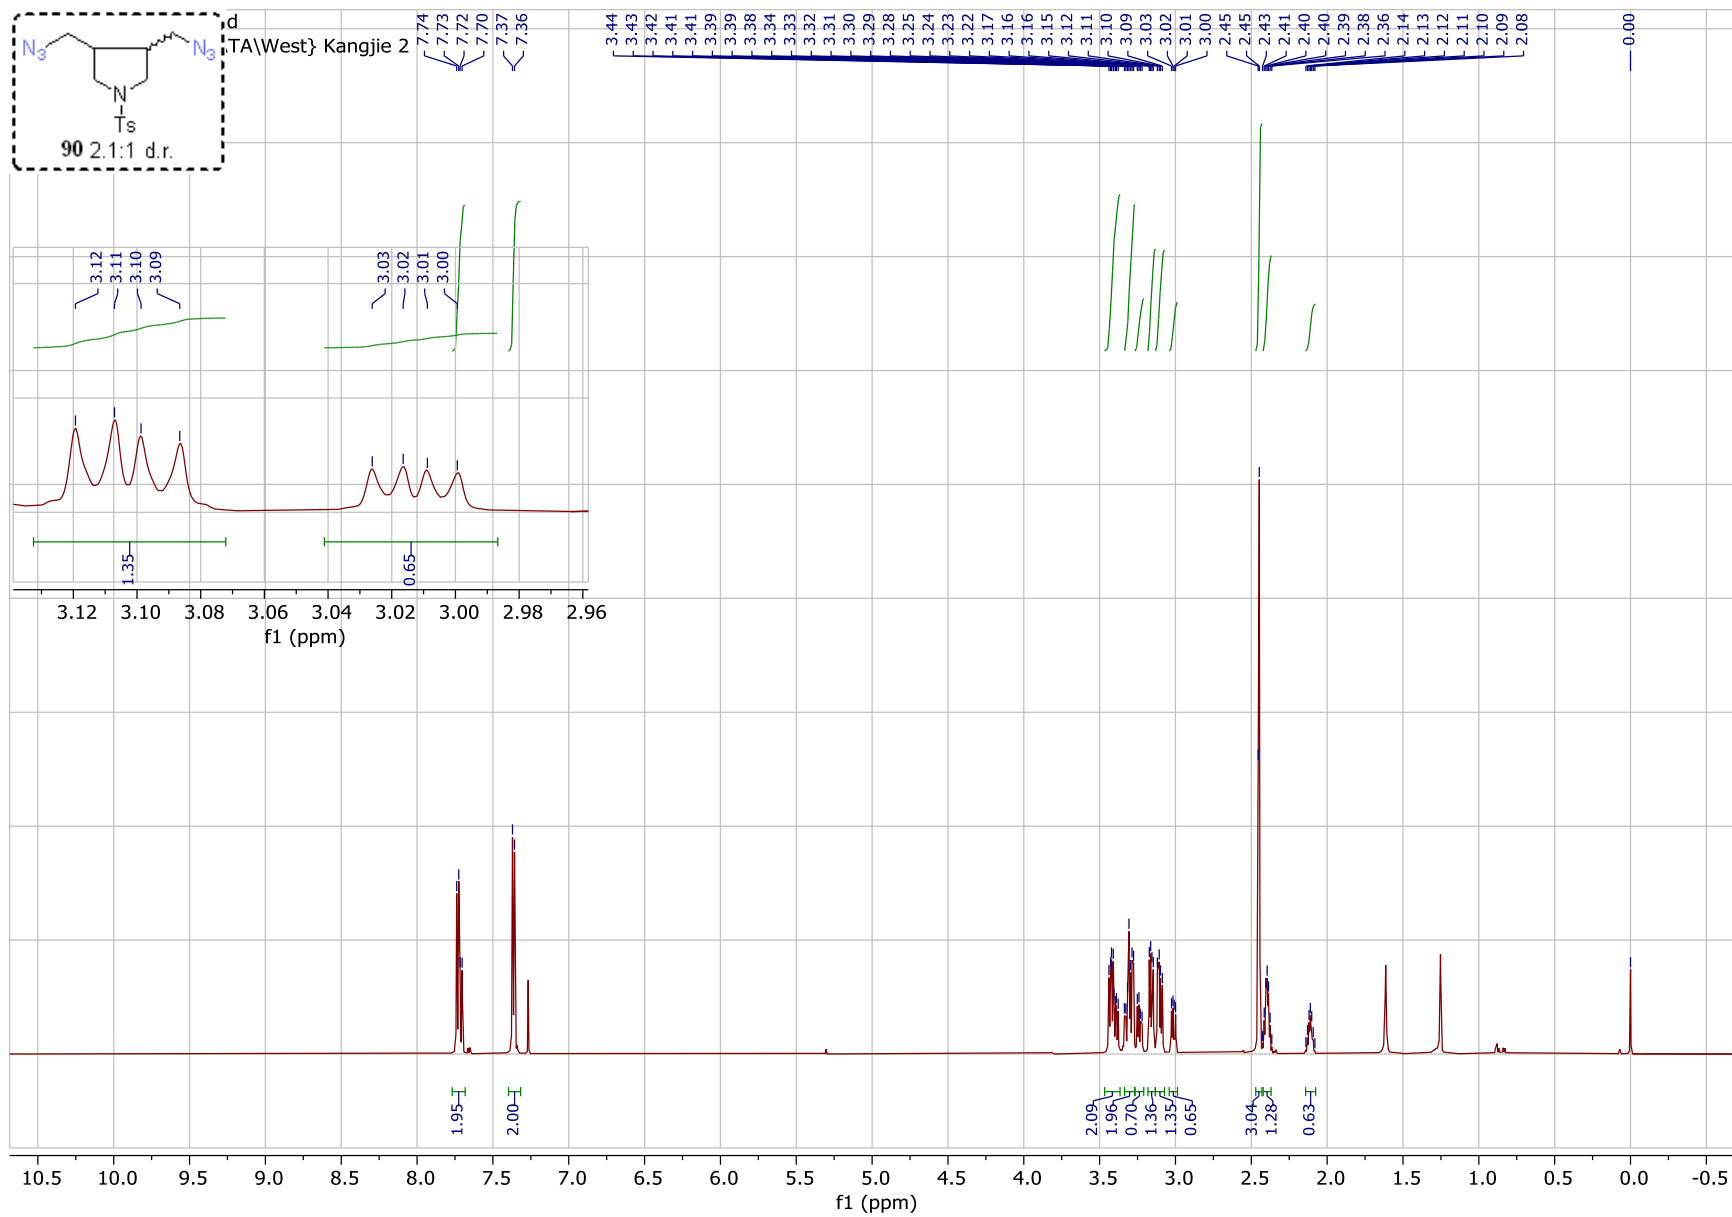



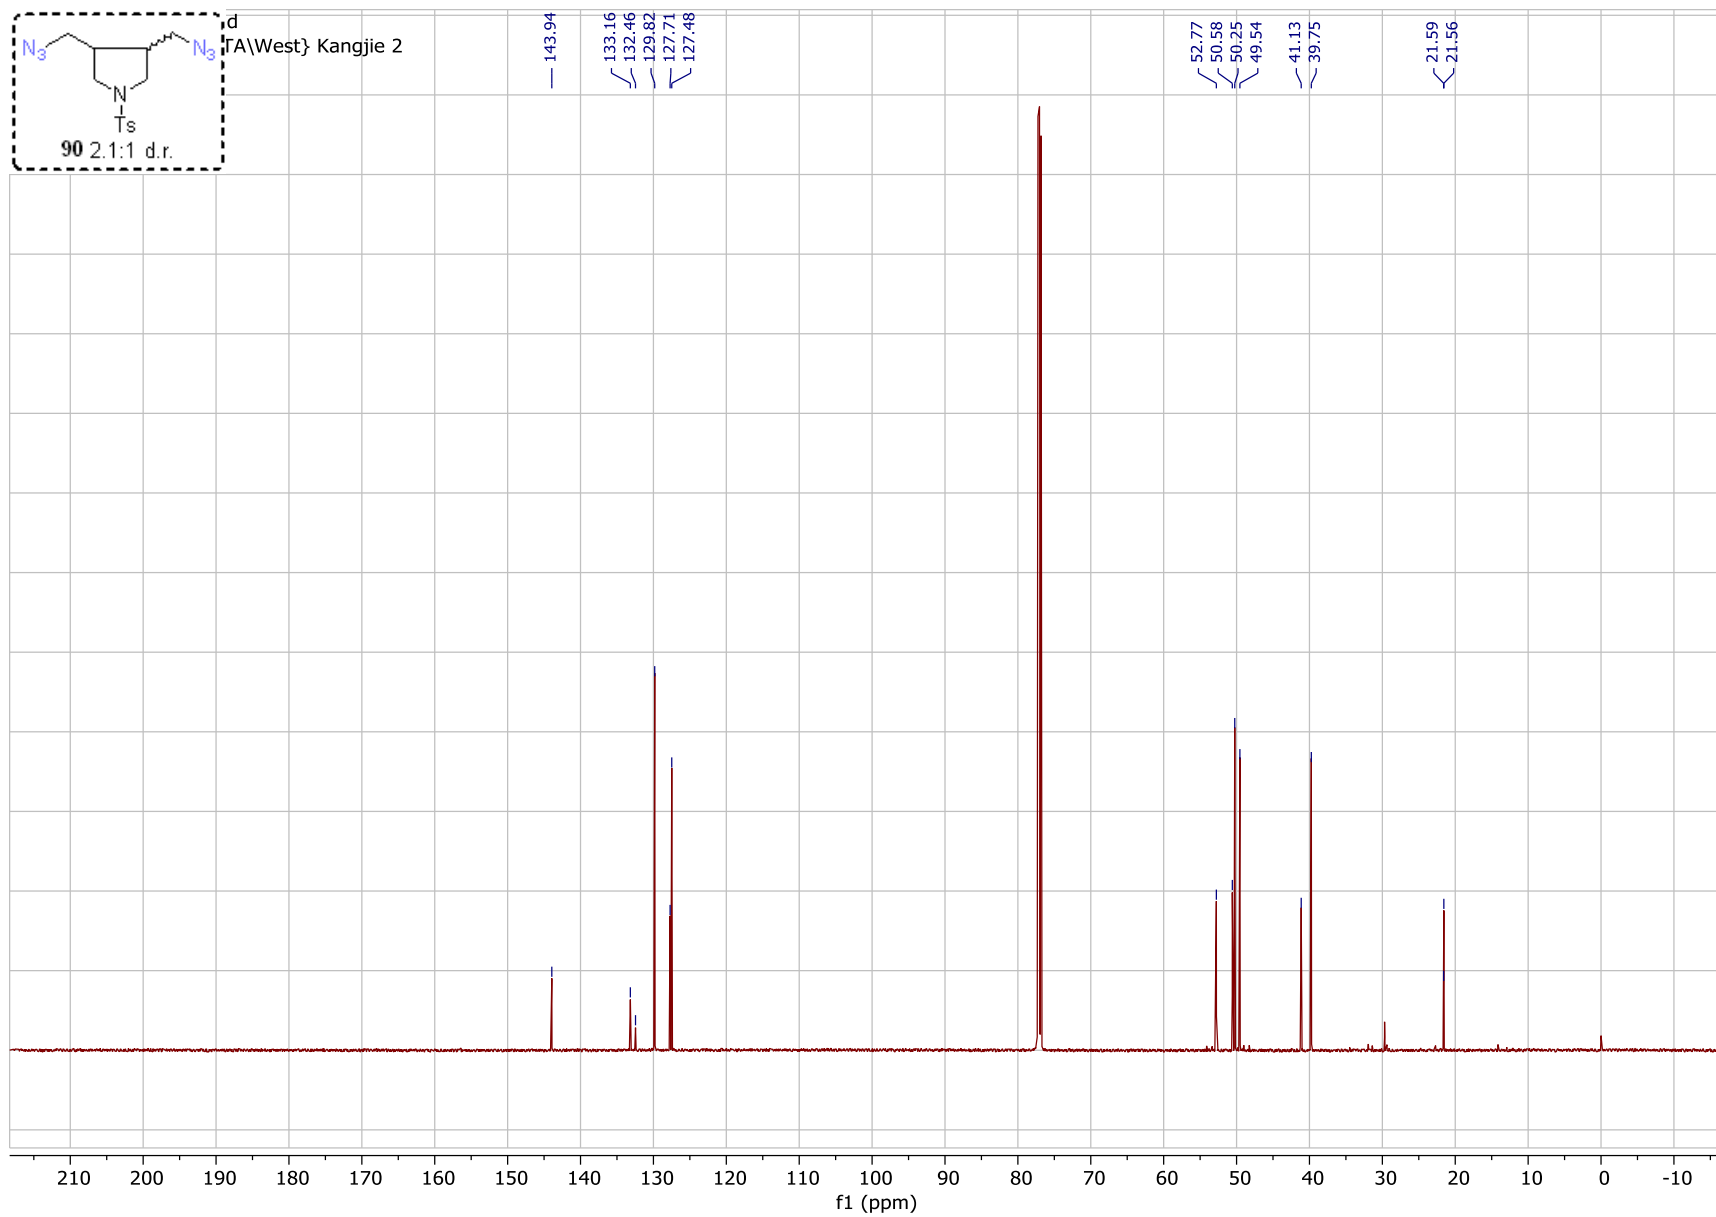

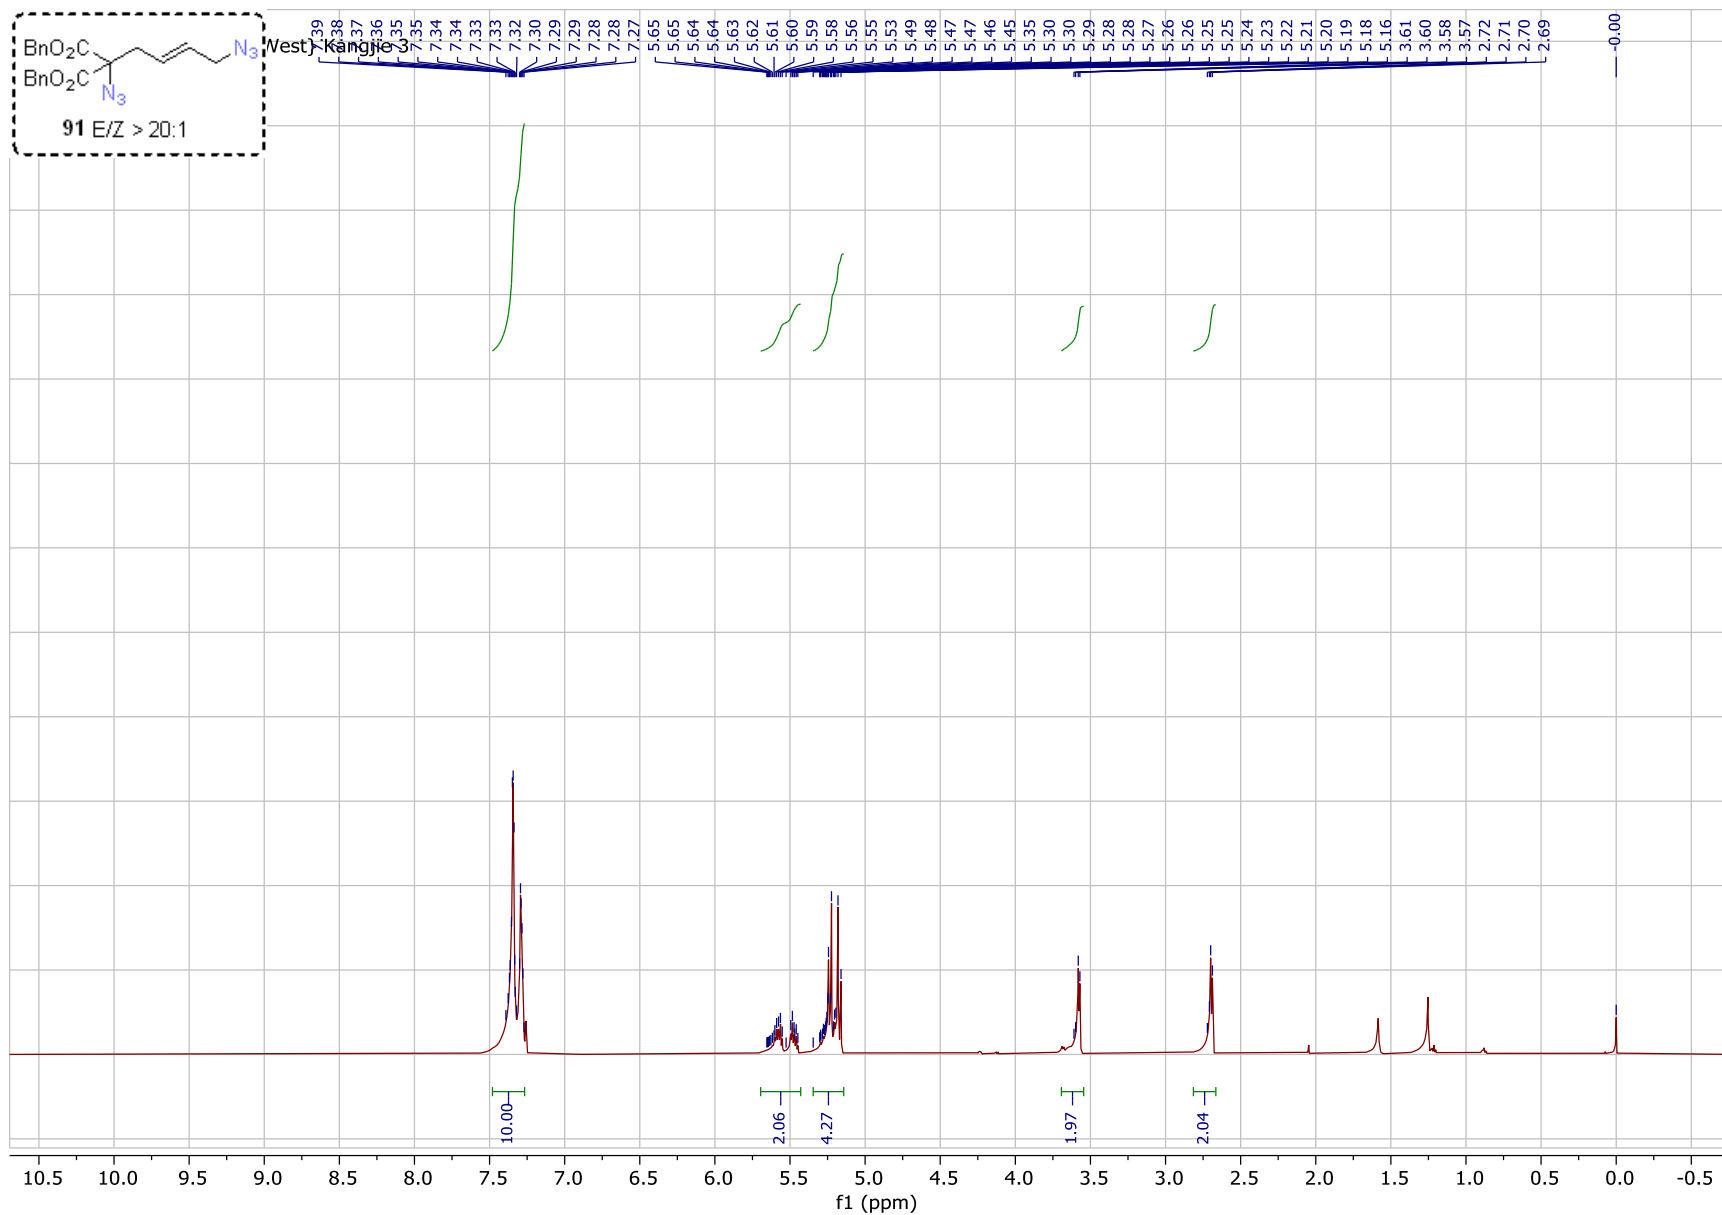

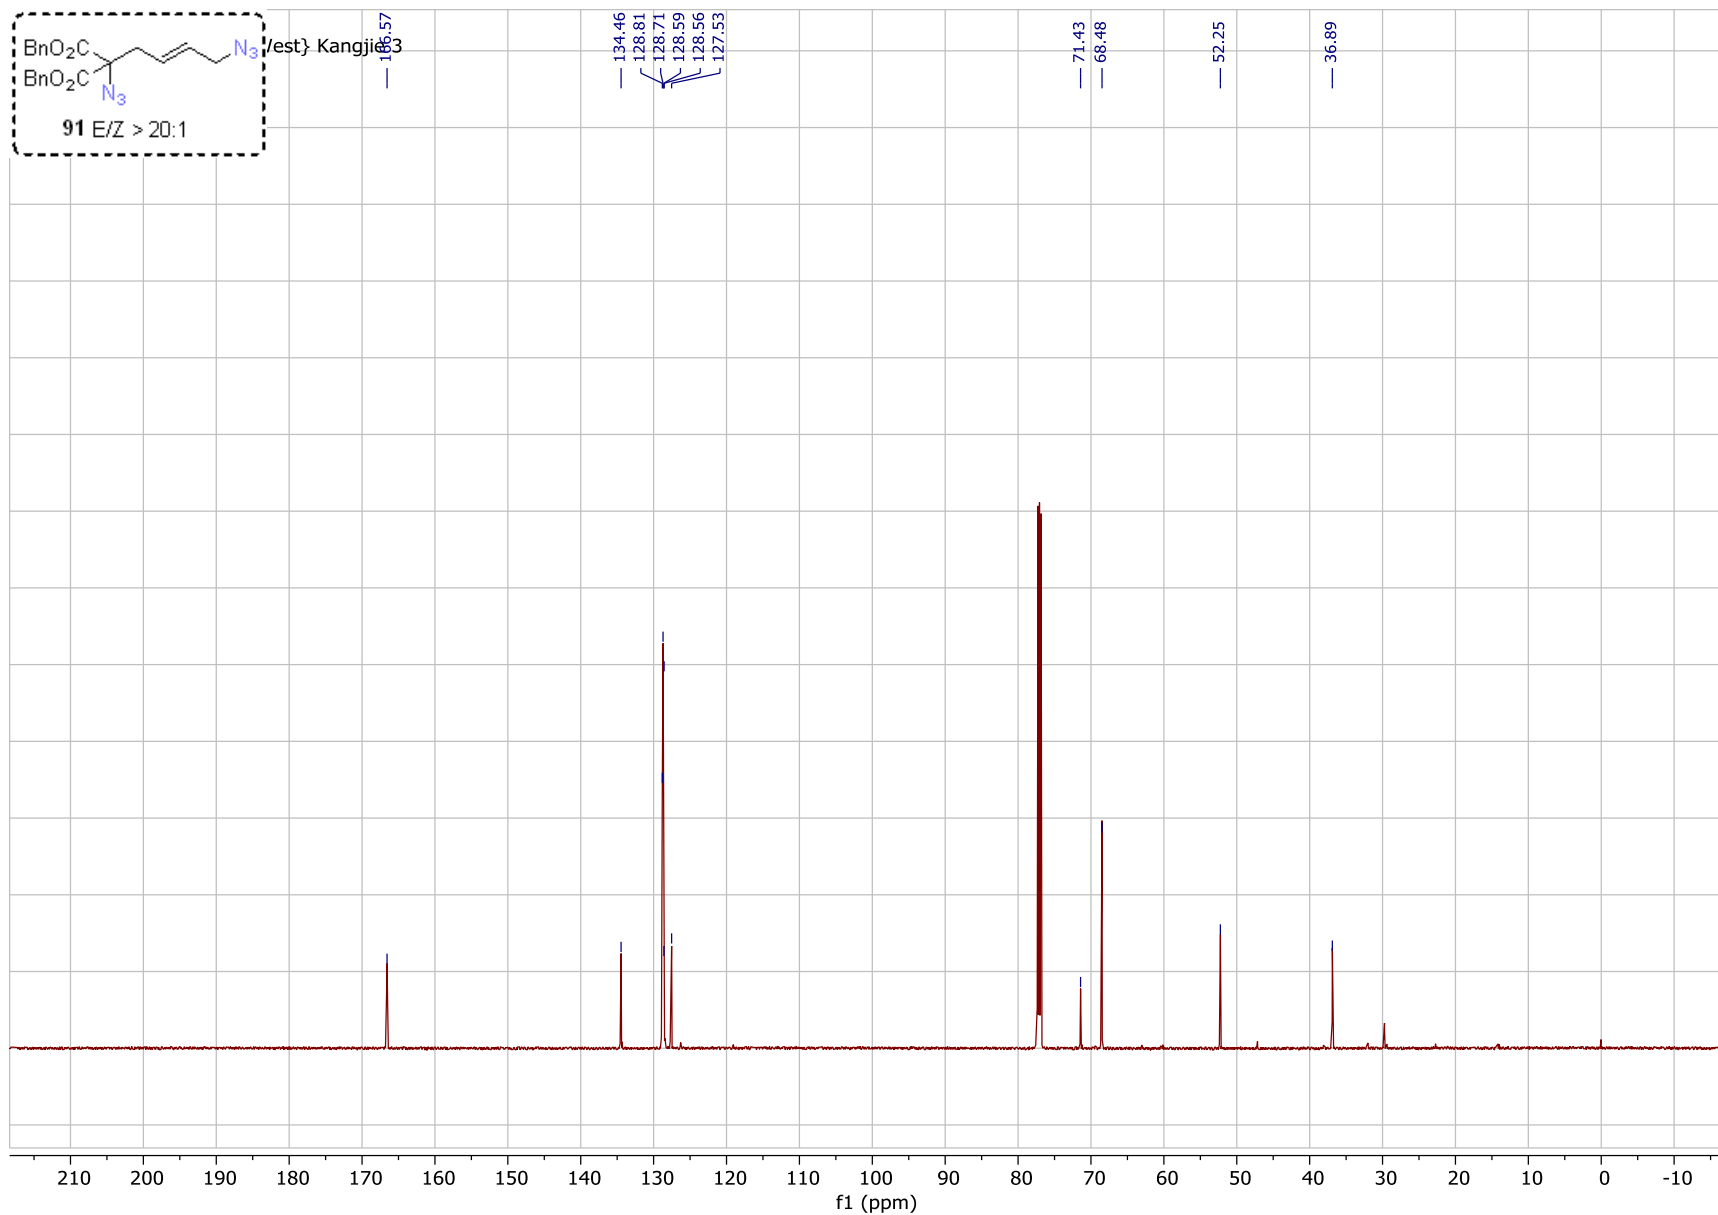

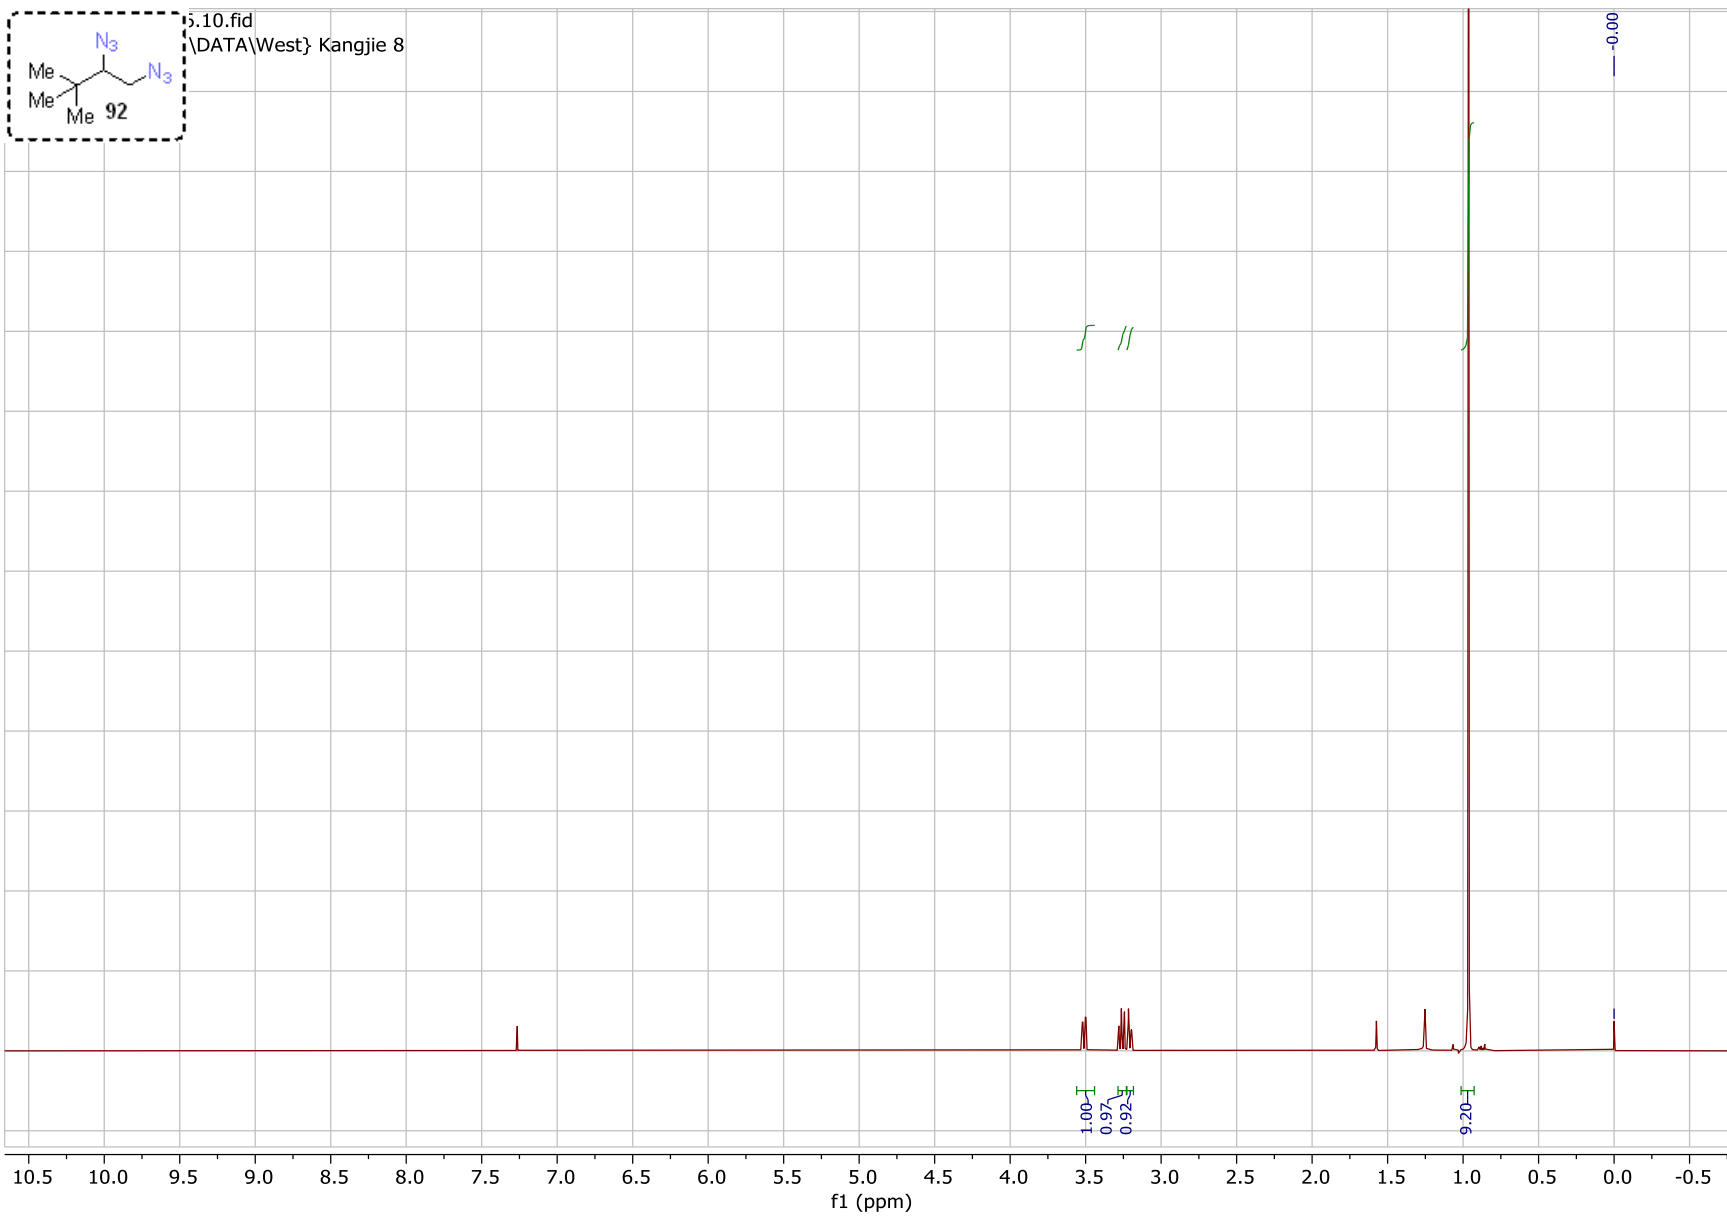

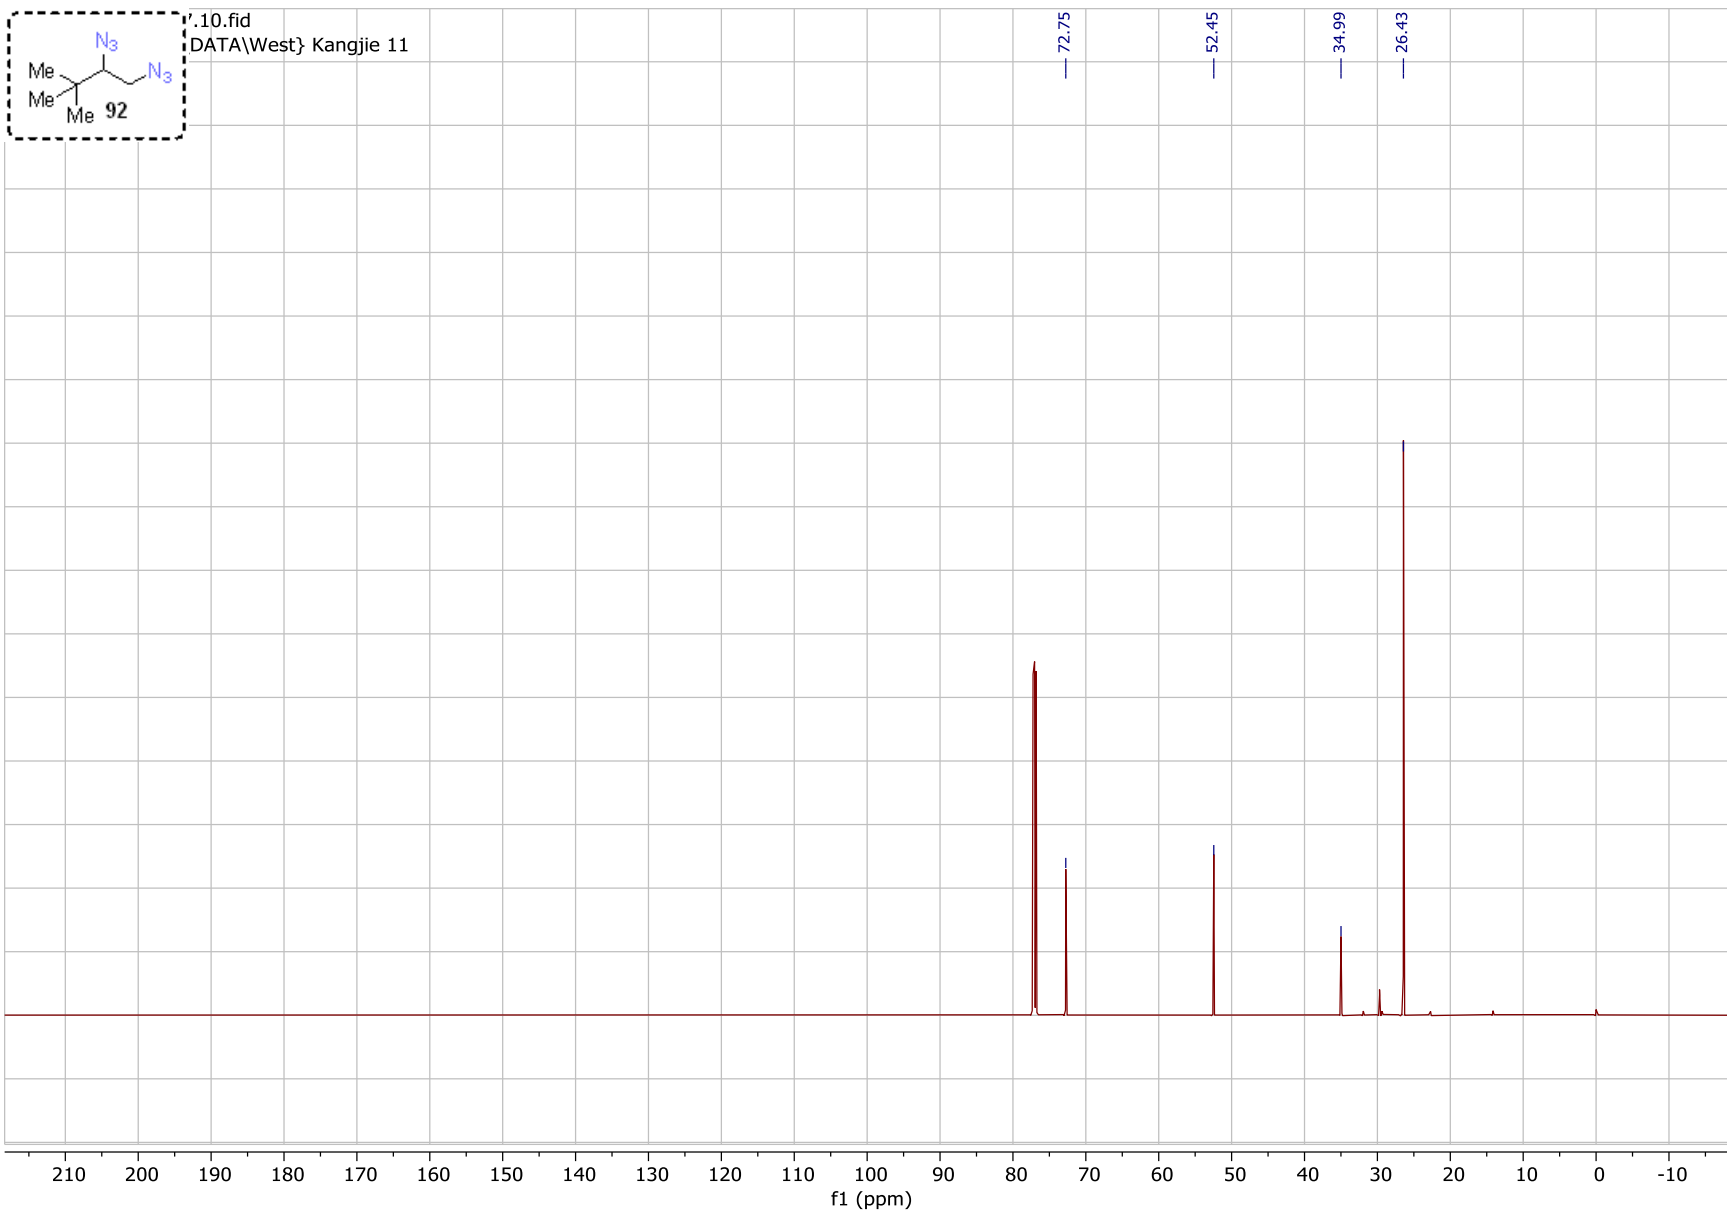

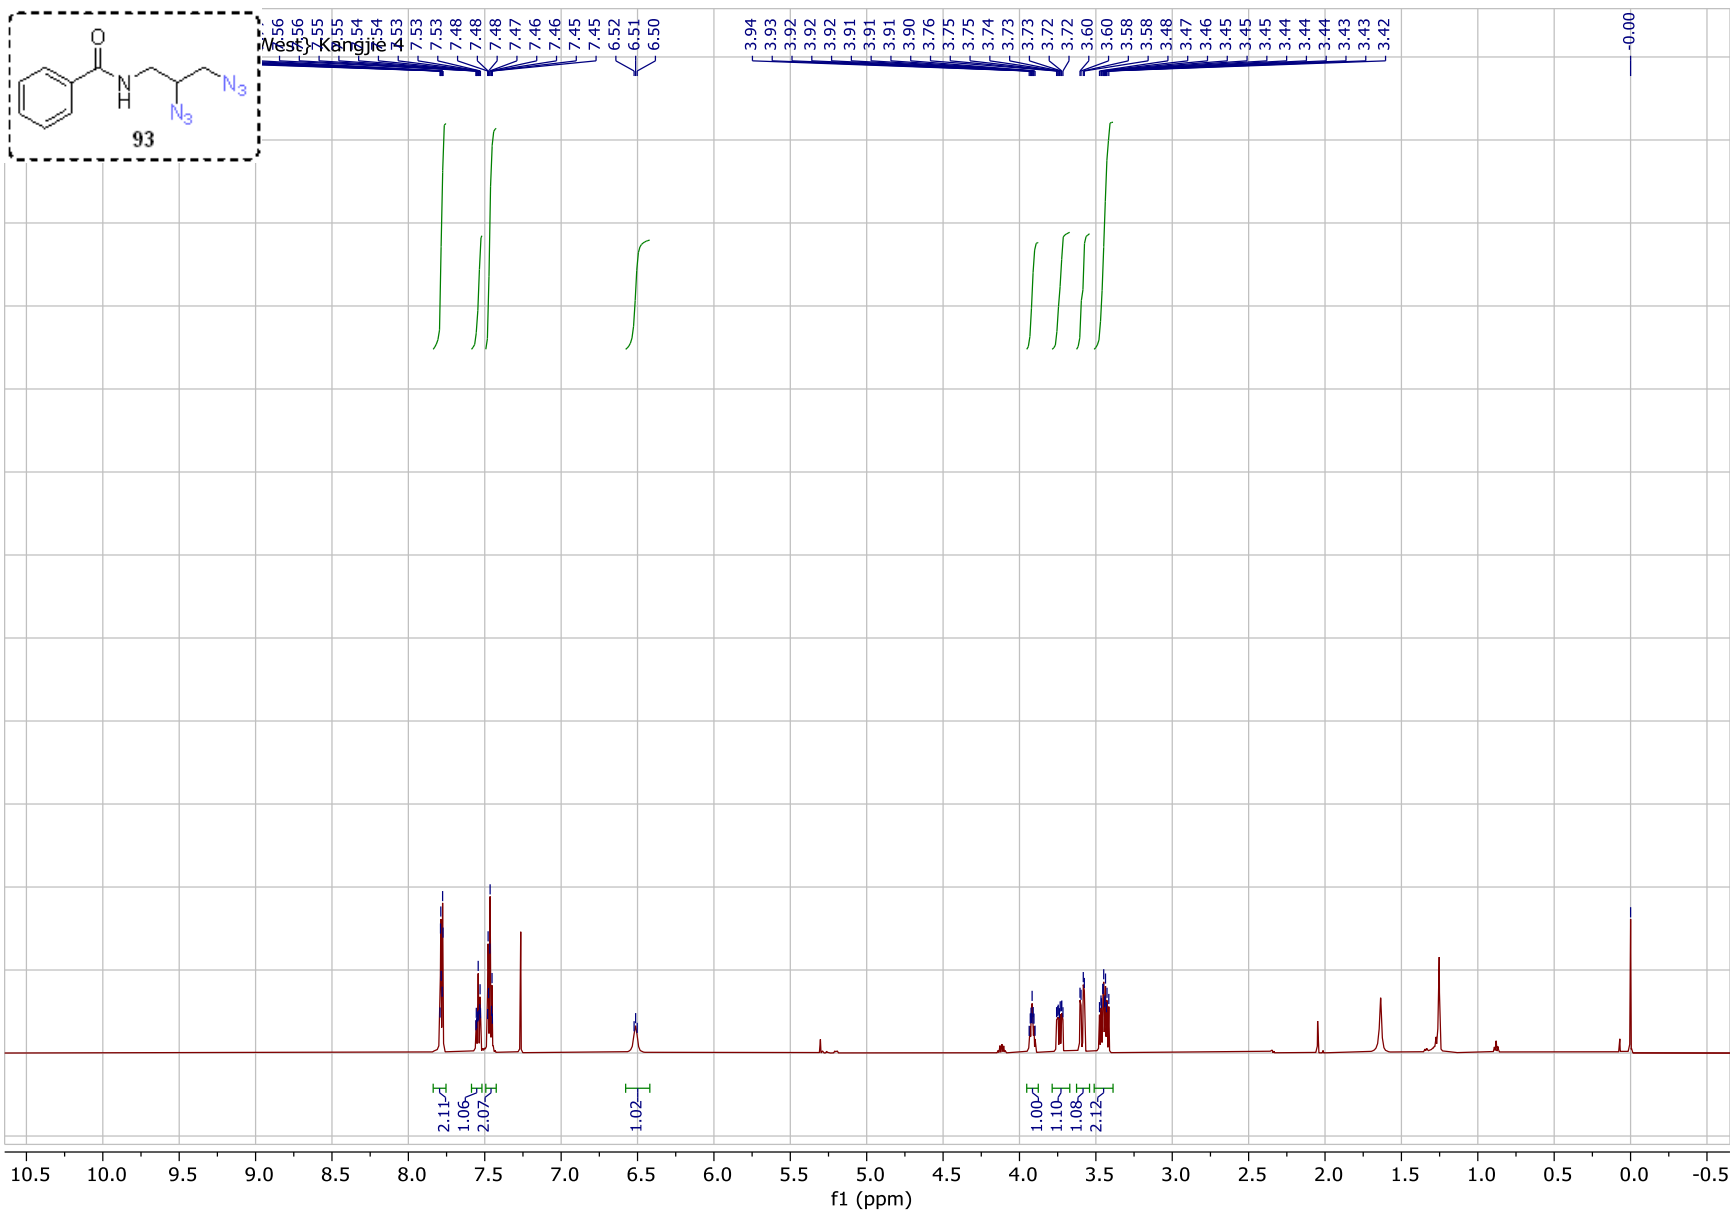

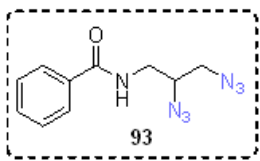

West Kangjia 4

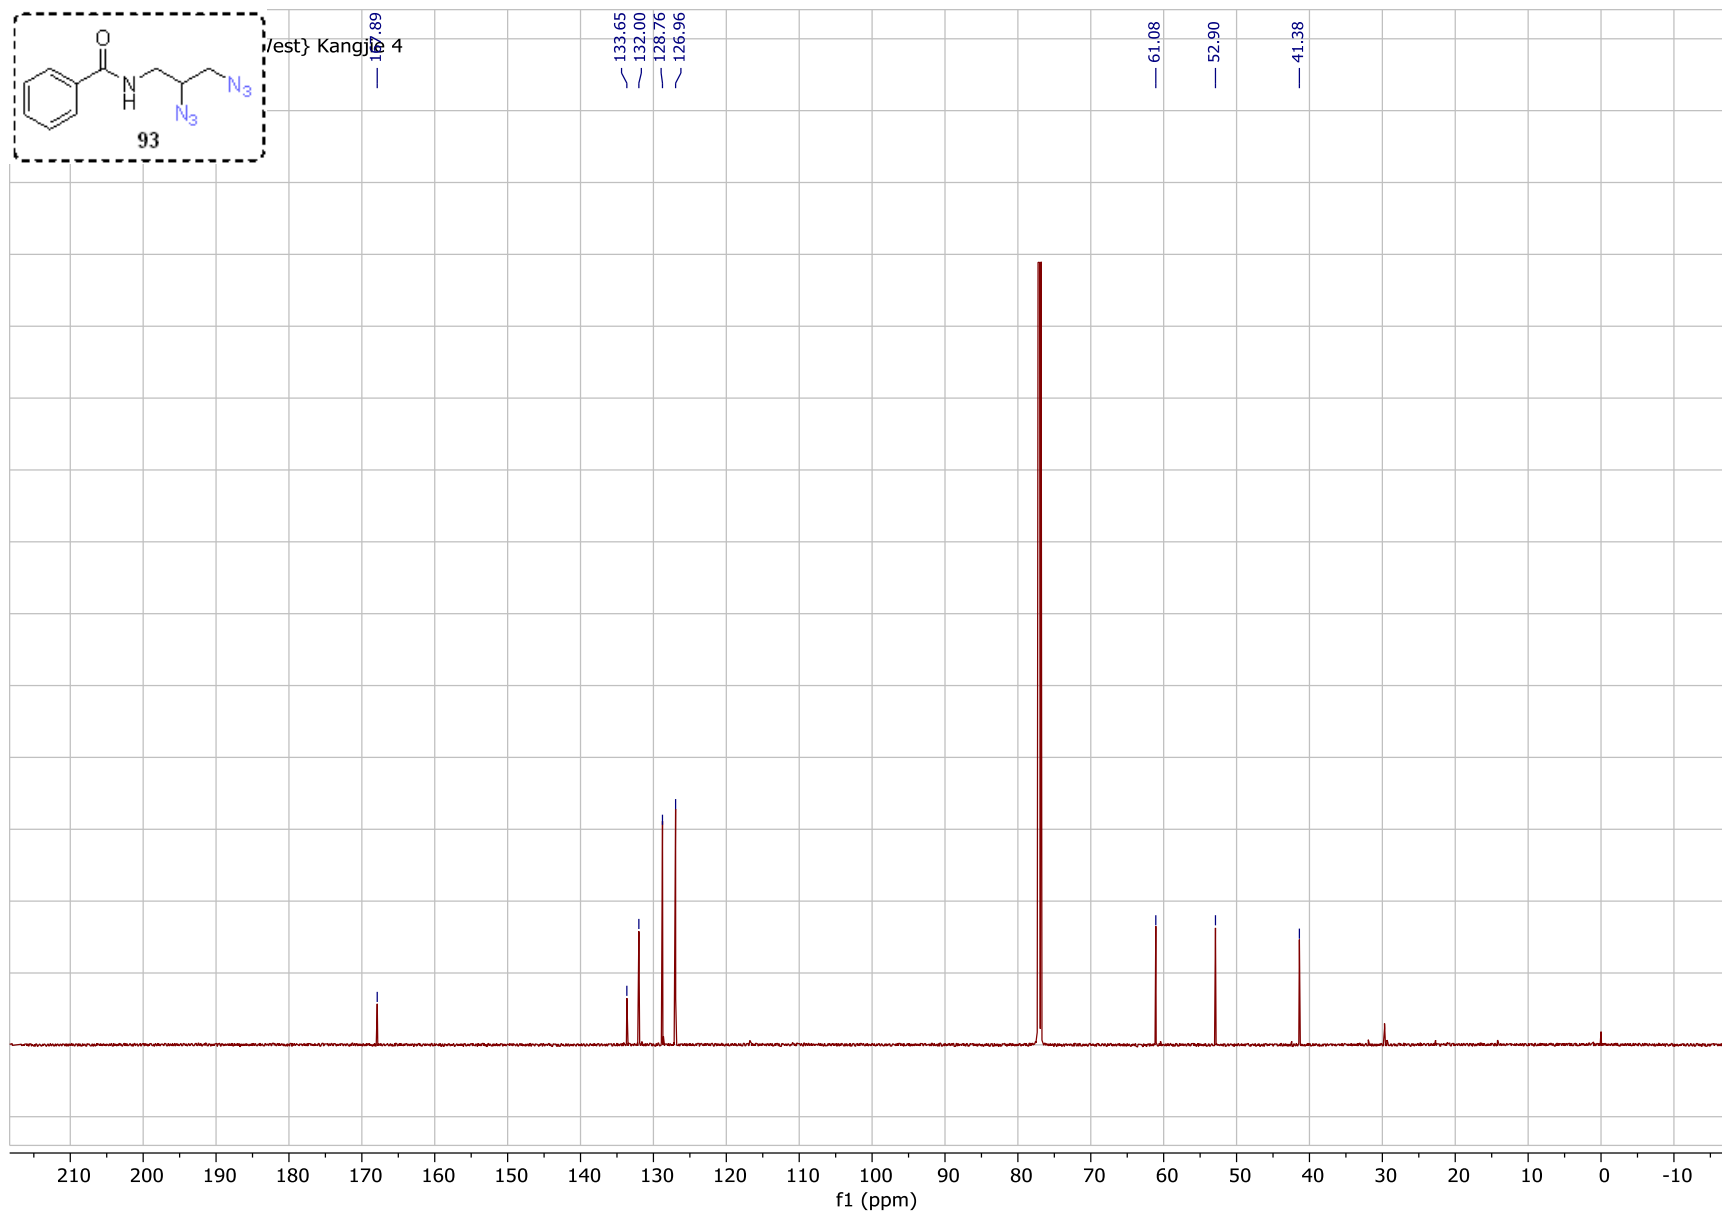

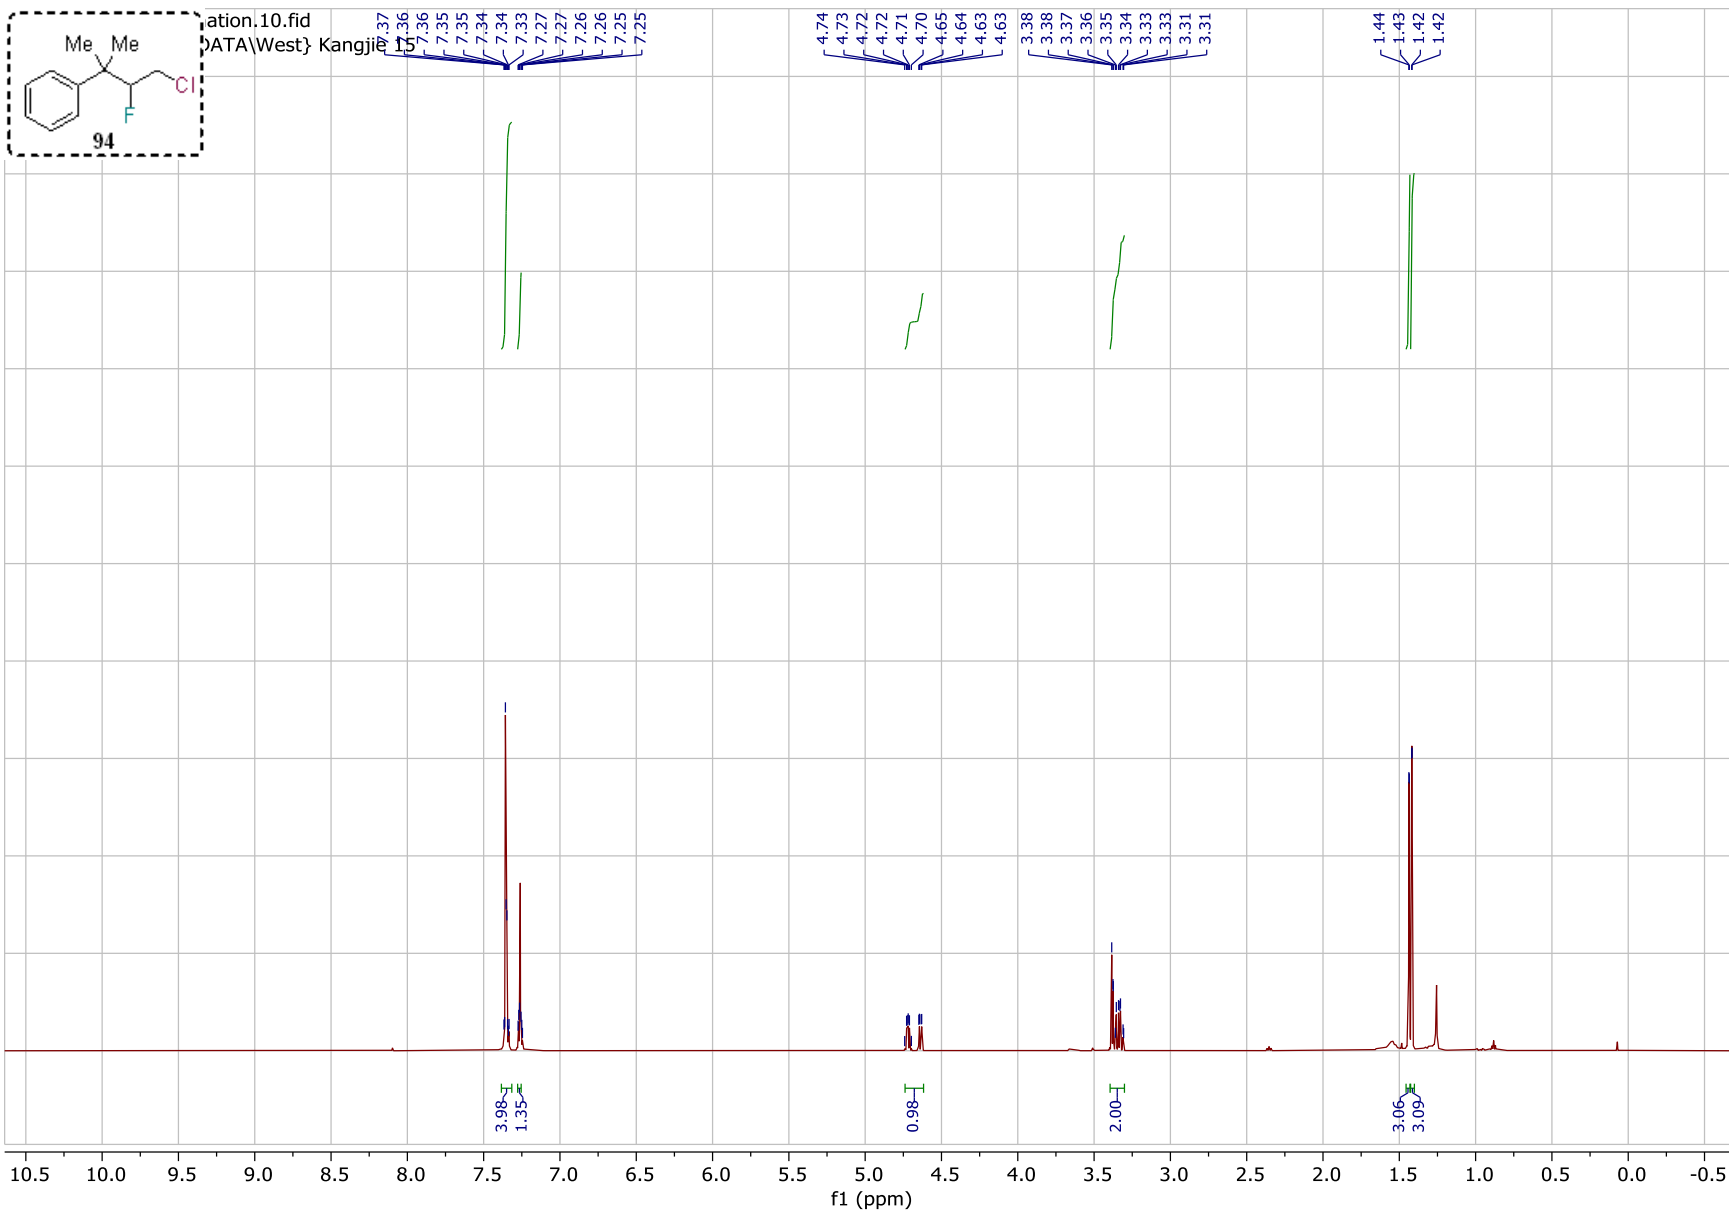



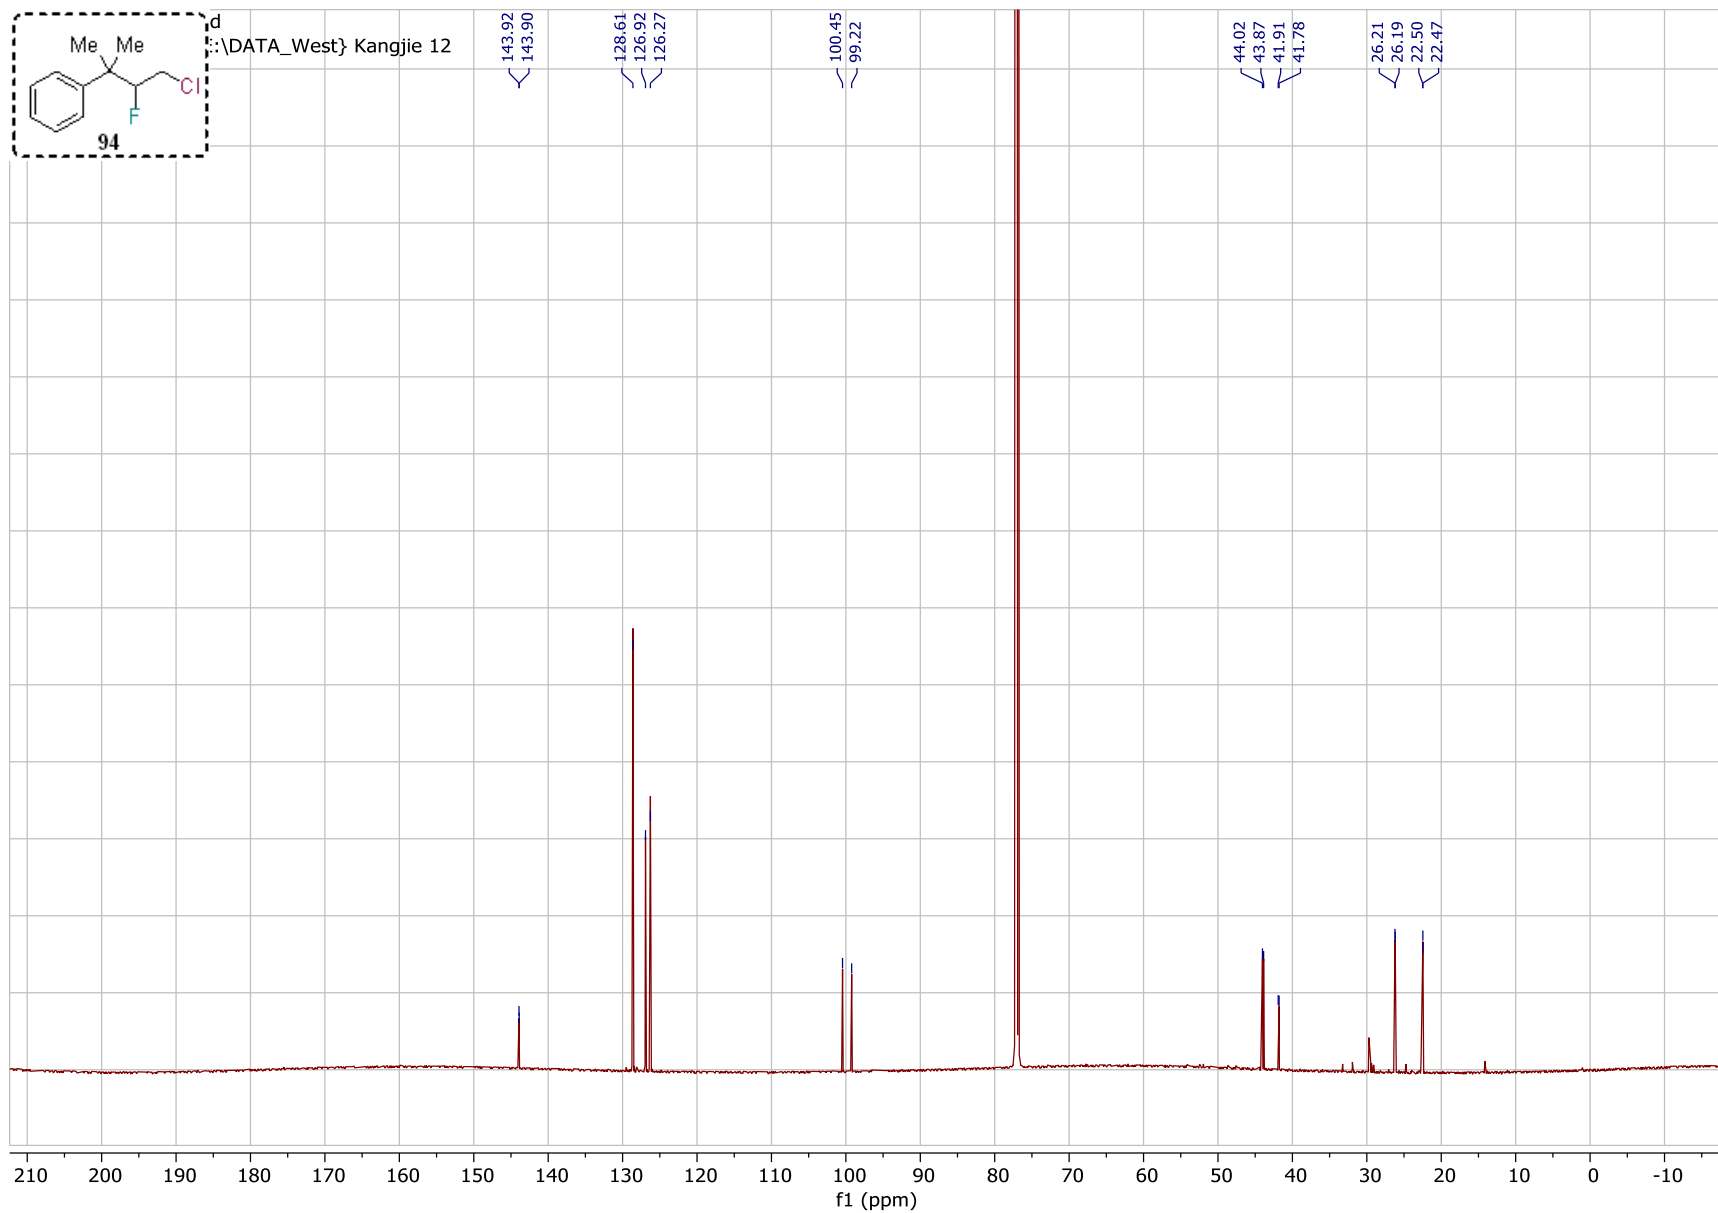

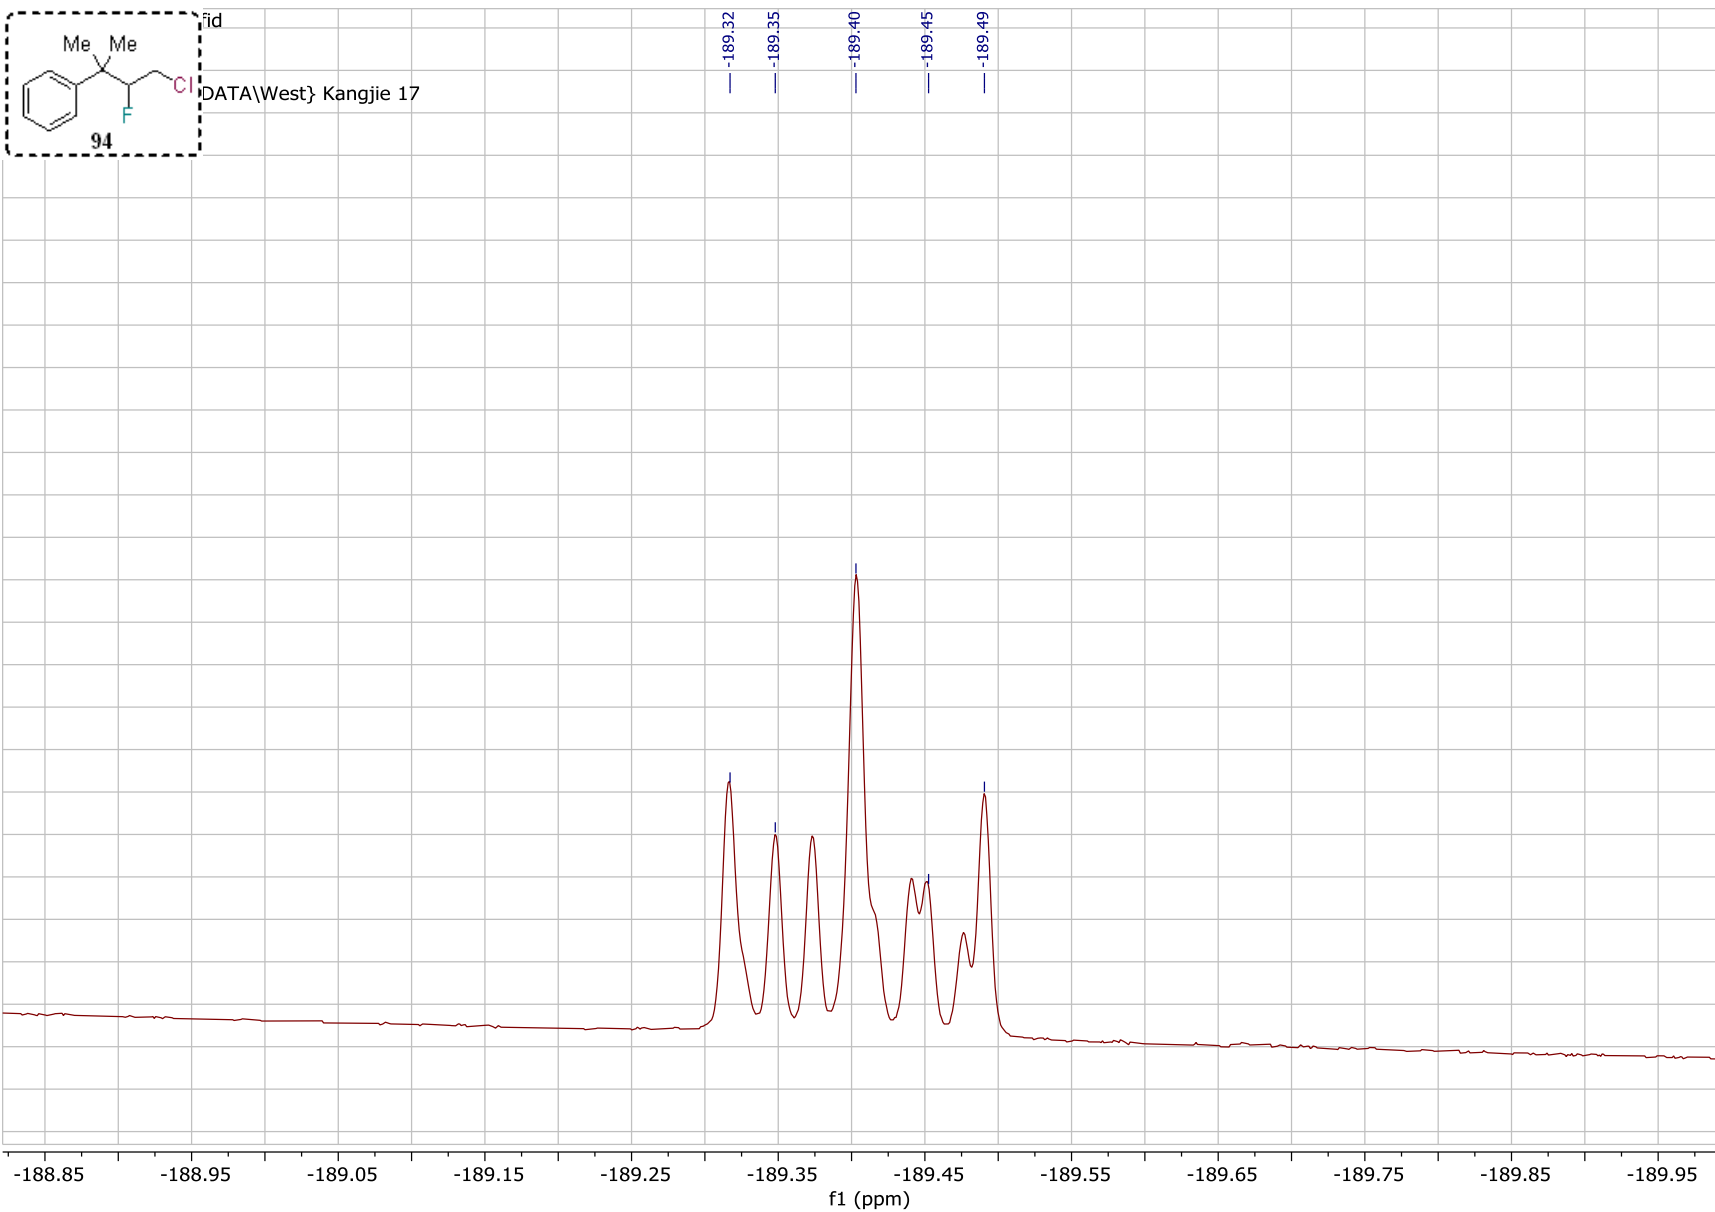

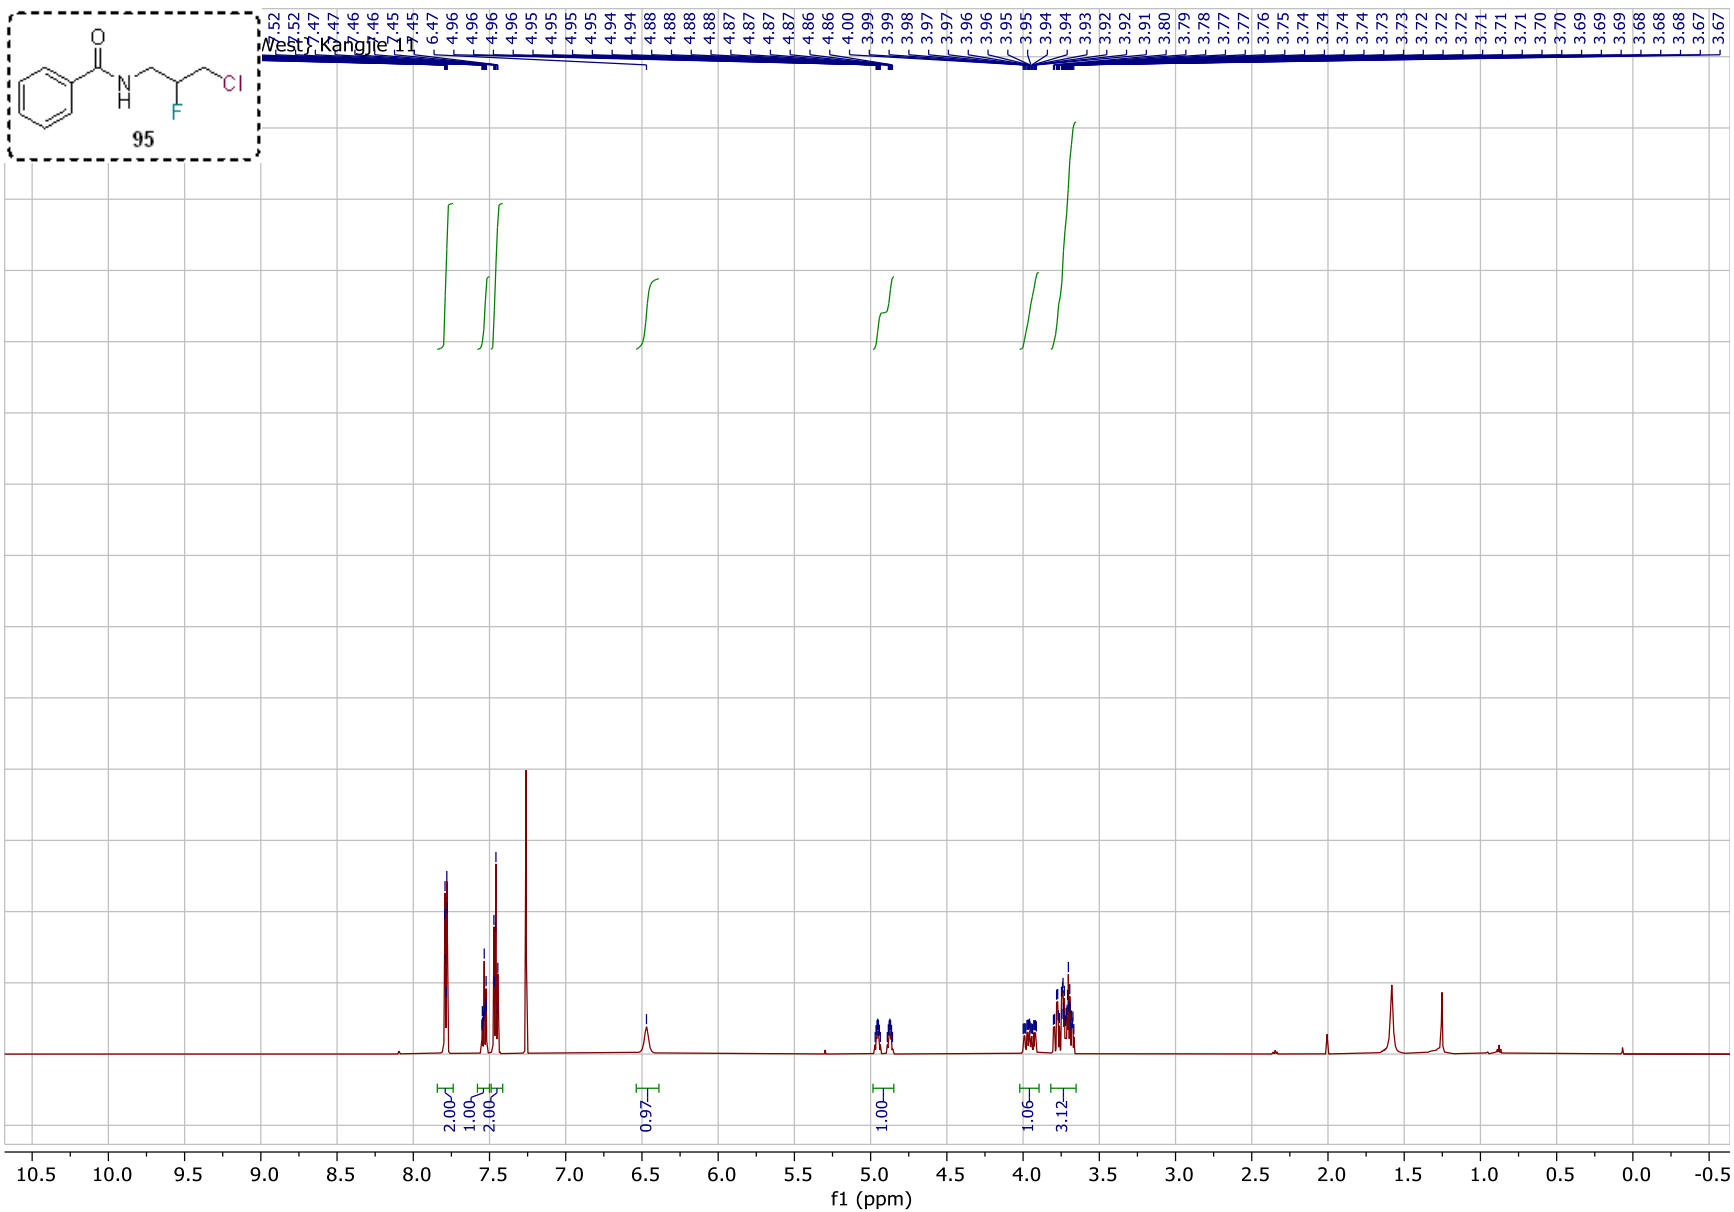

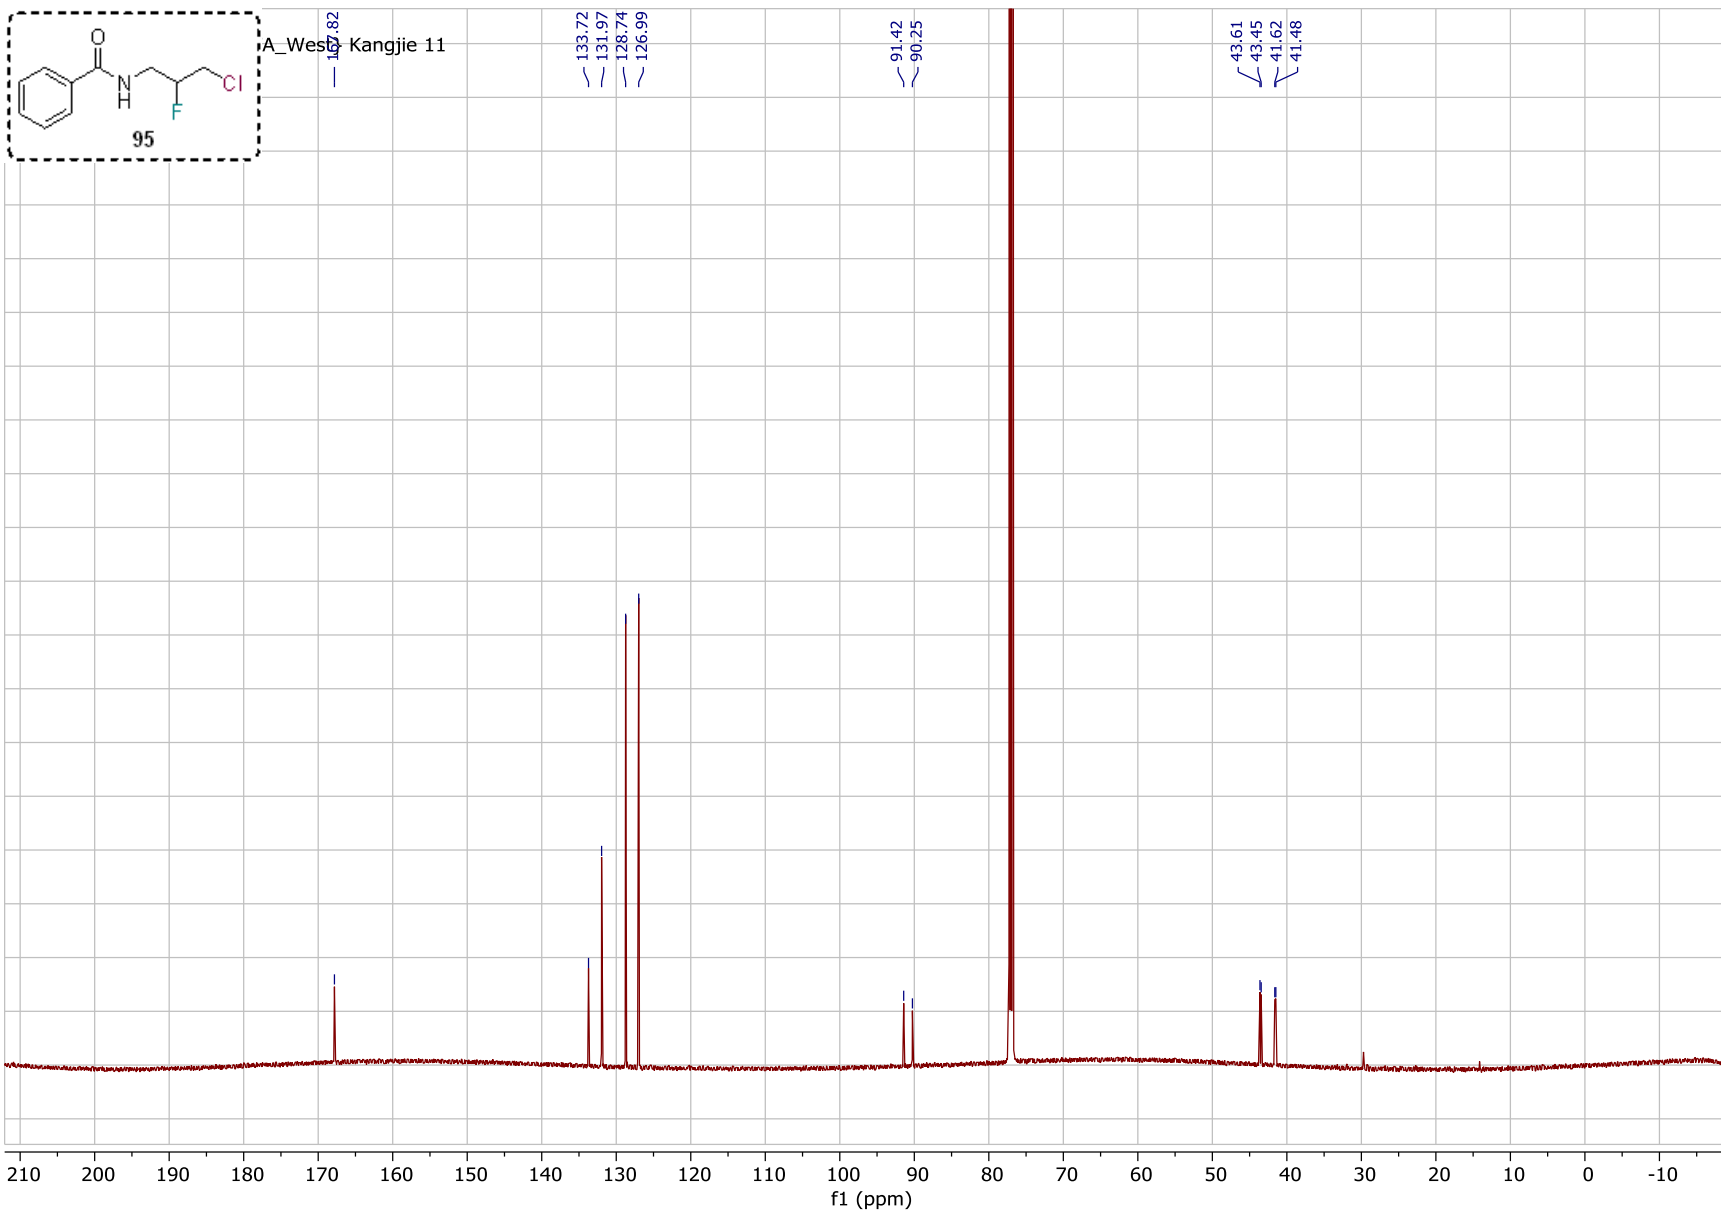

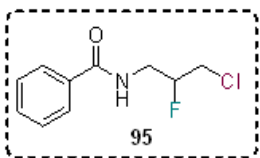

West Kangjie 16

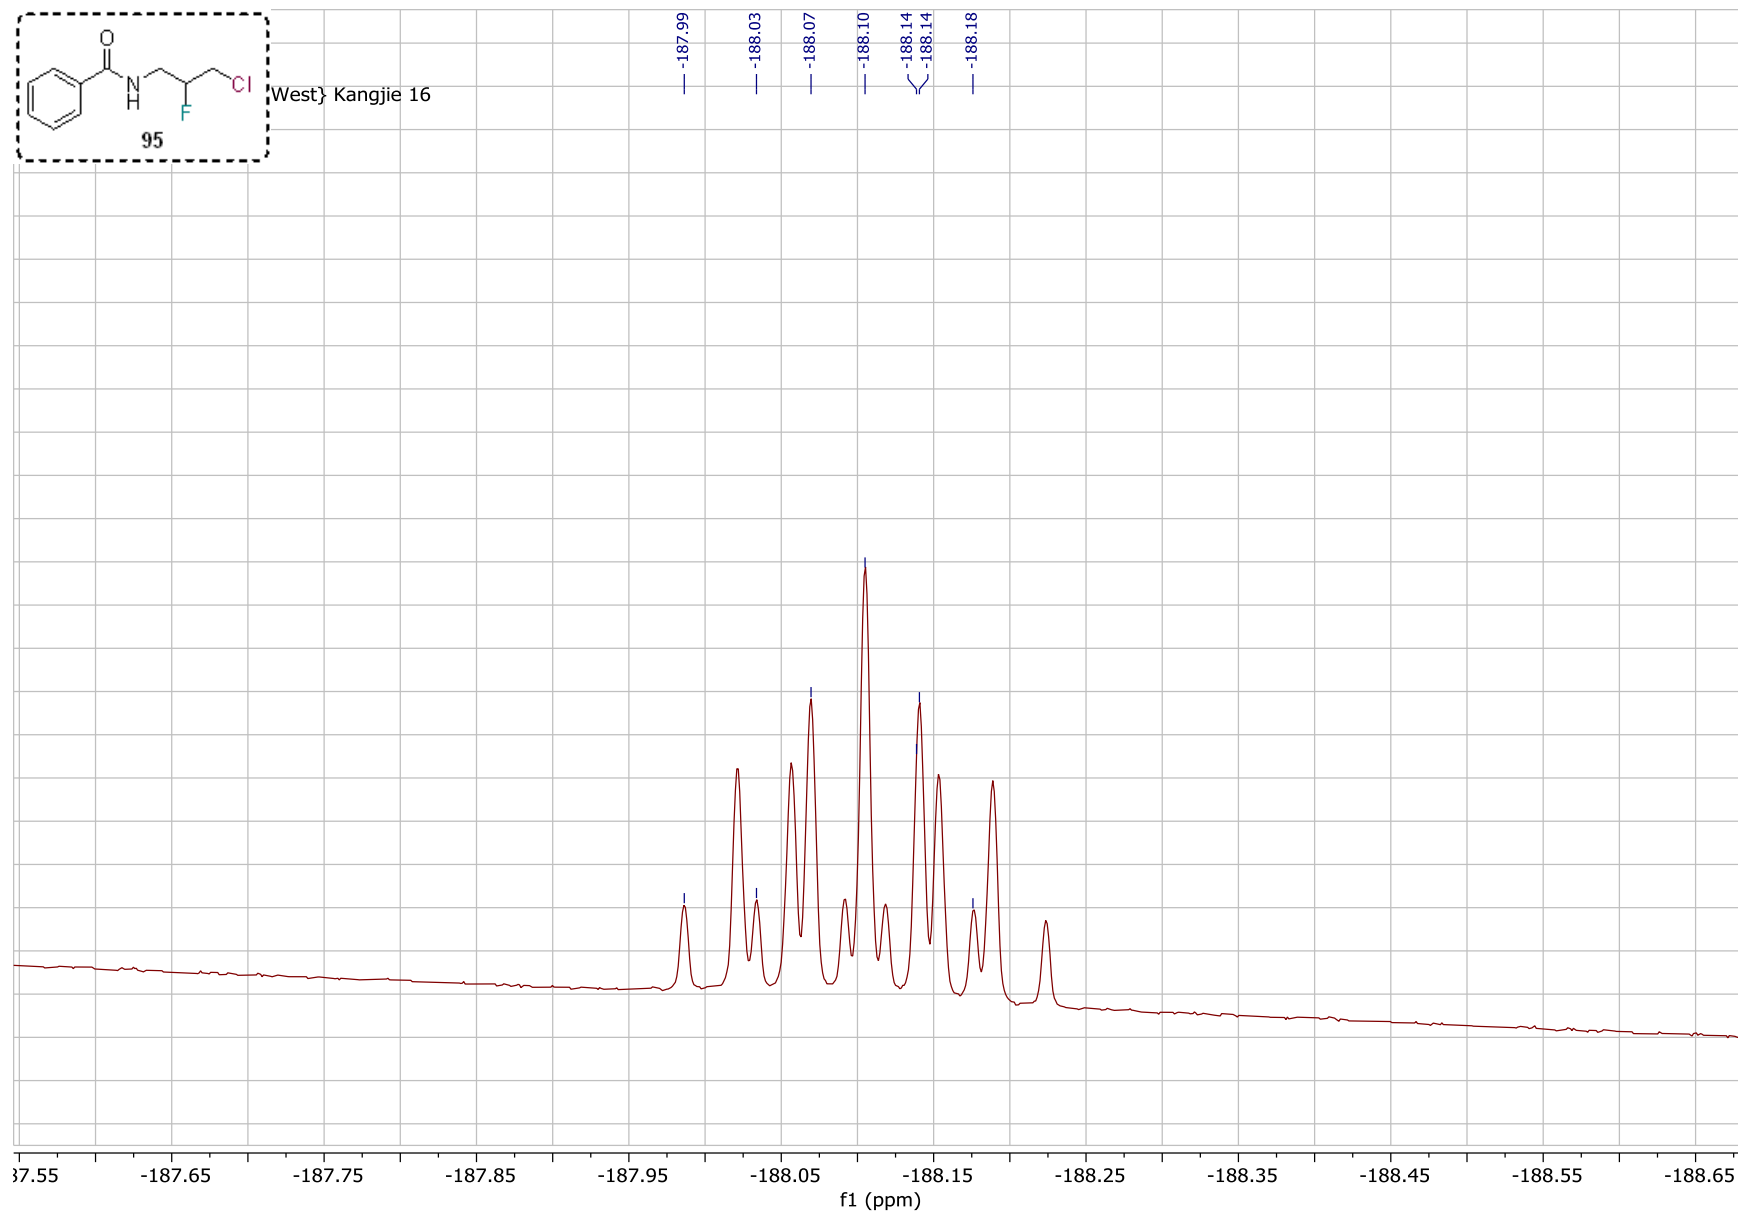

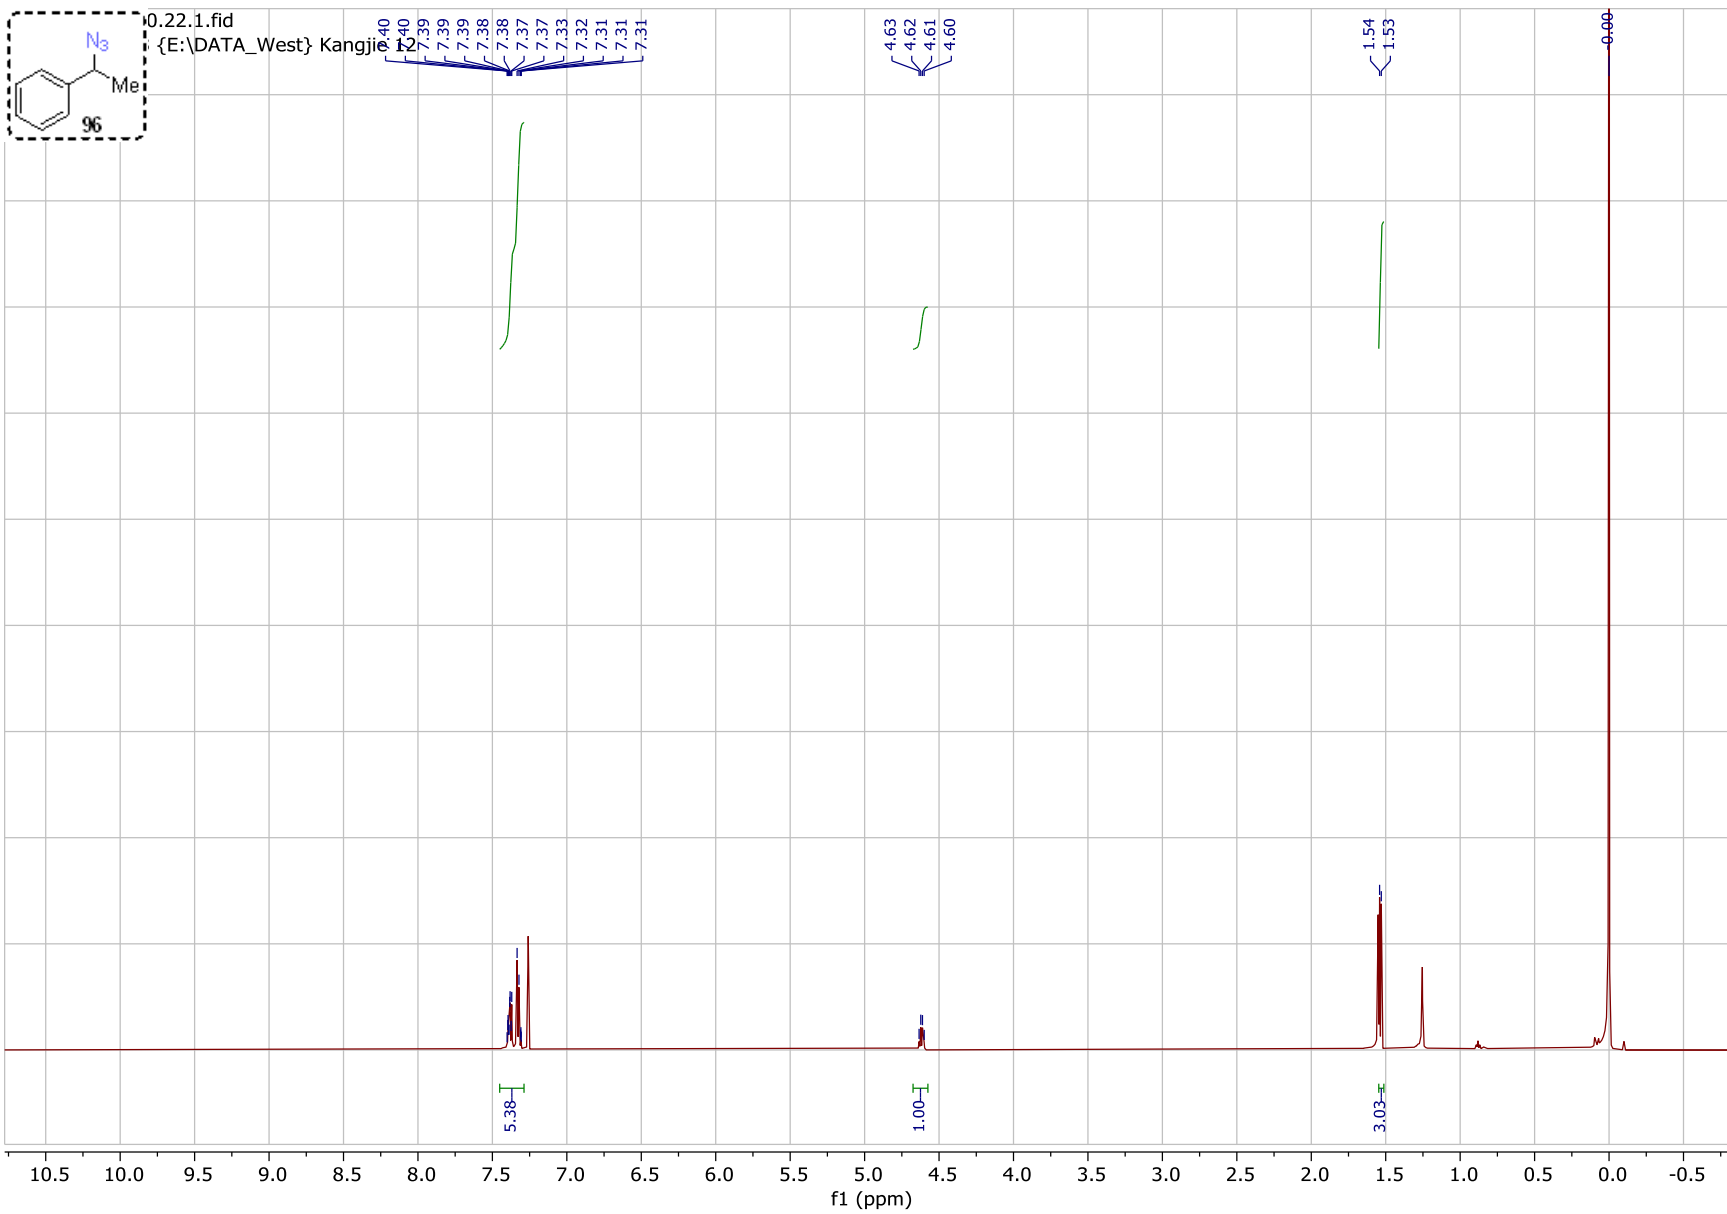

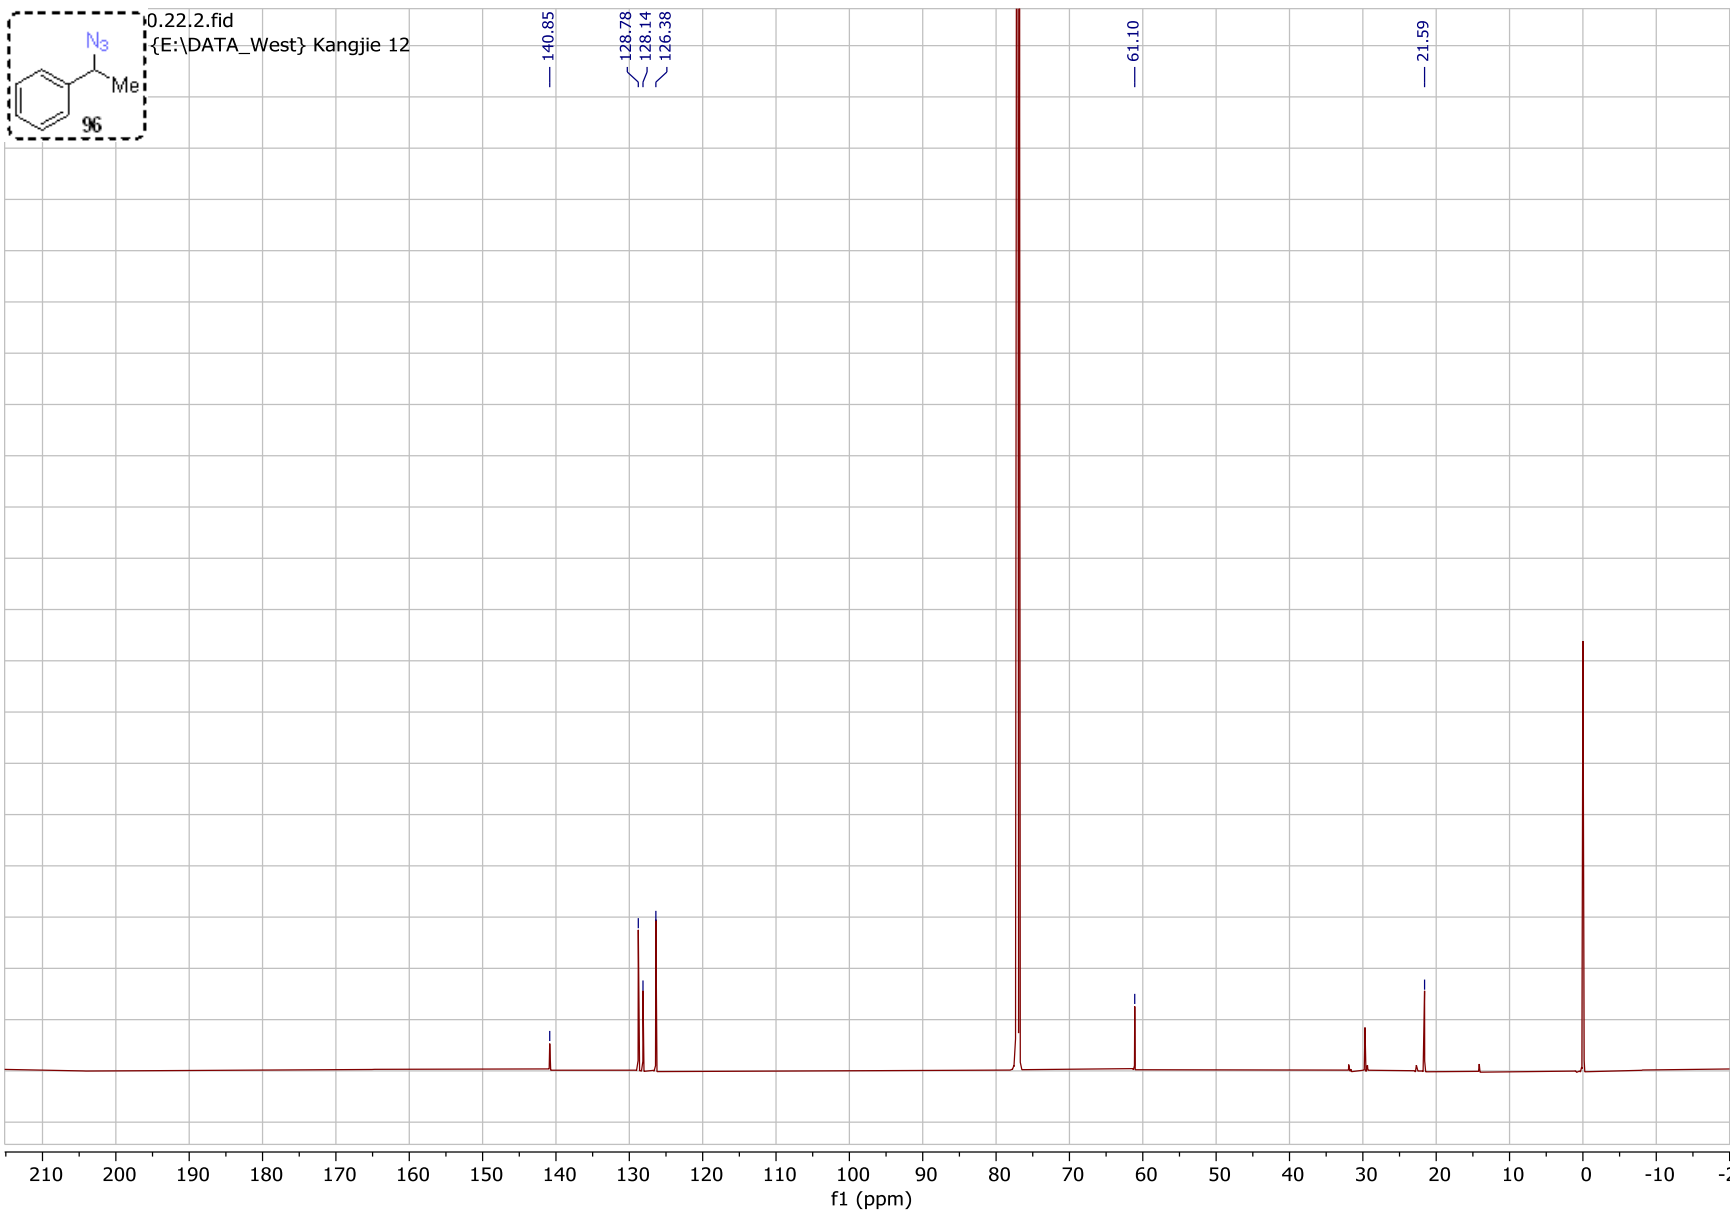

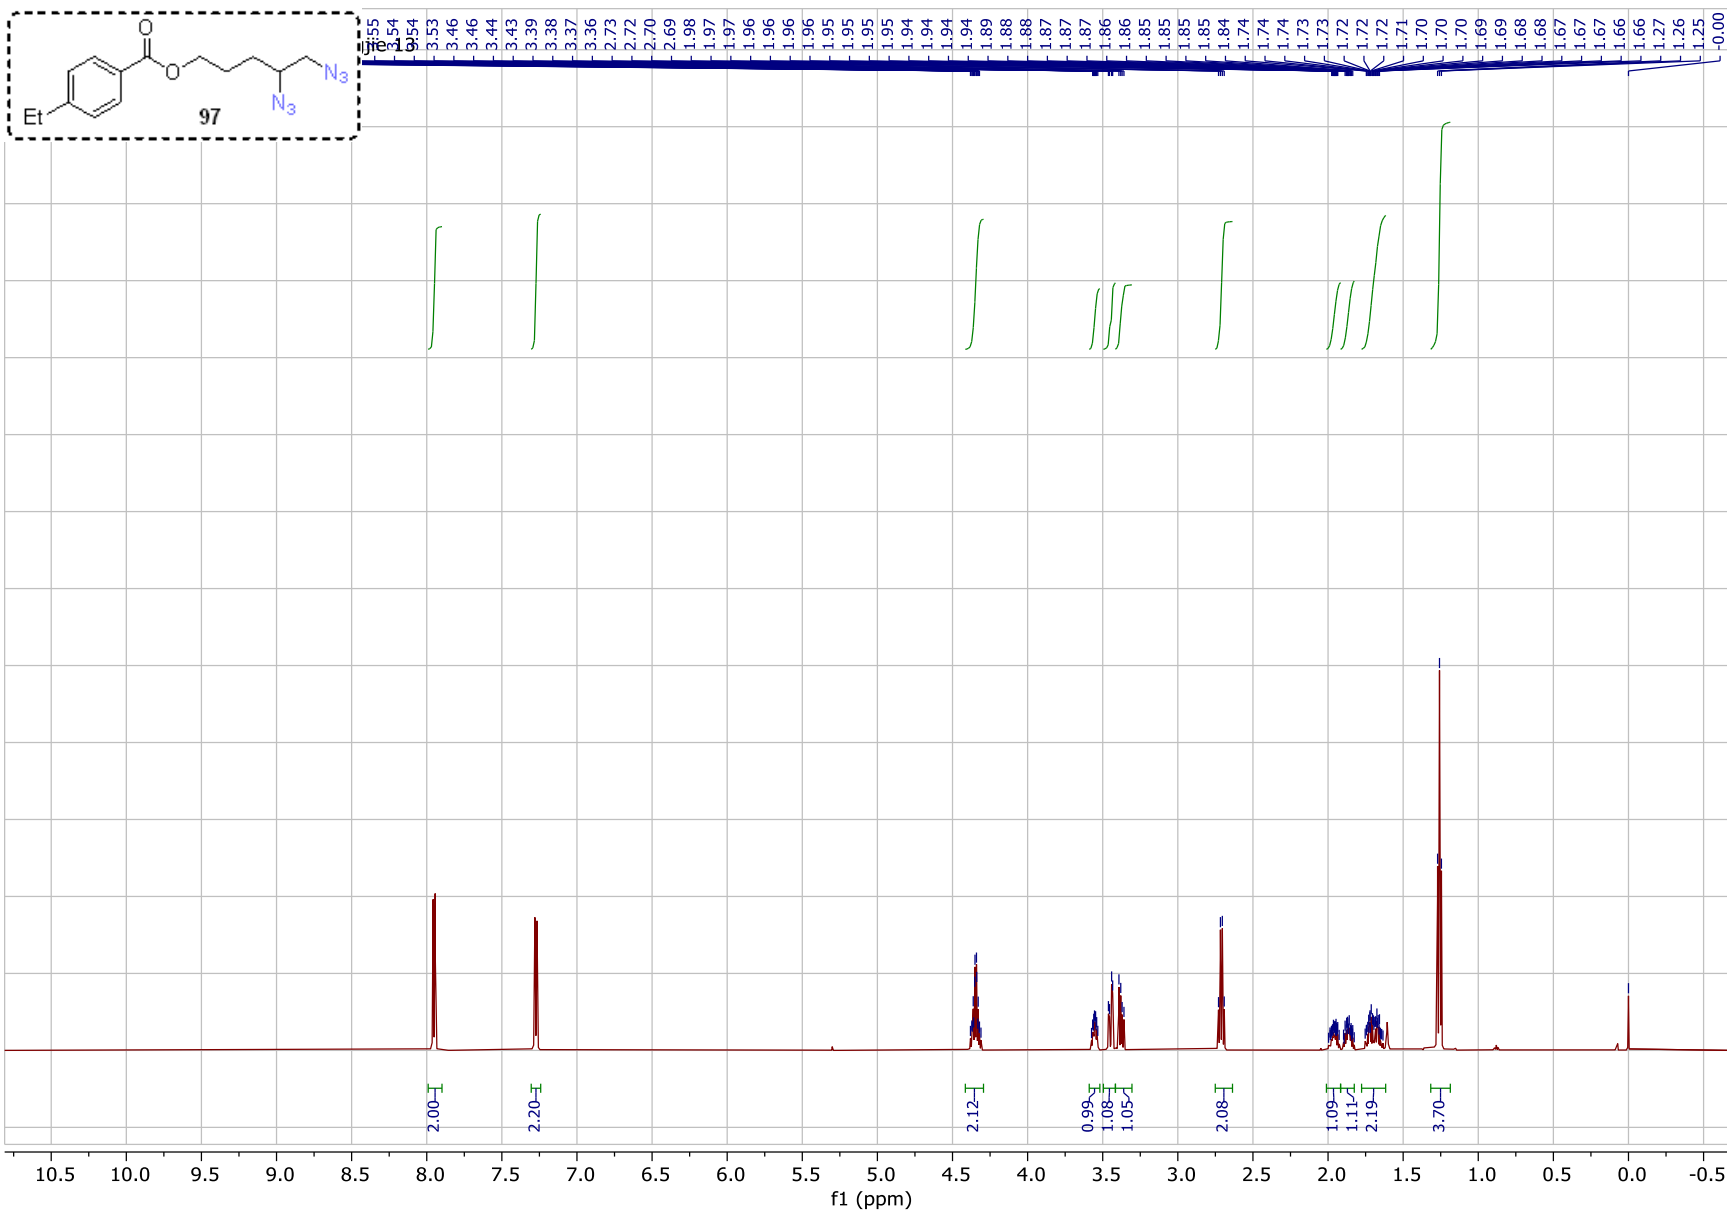



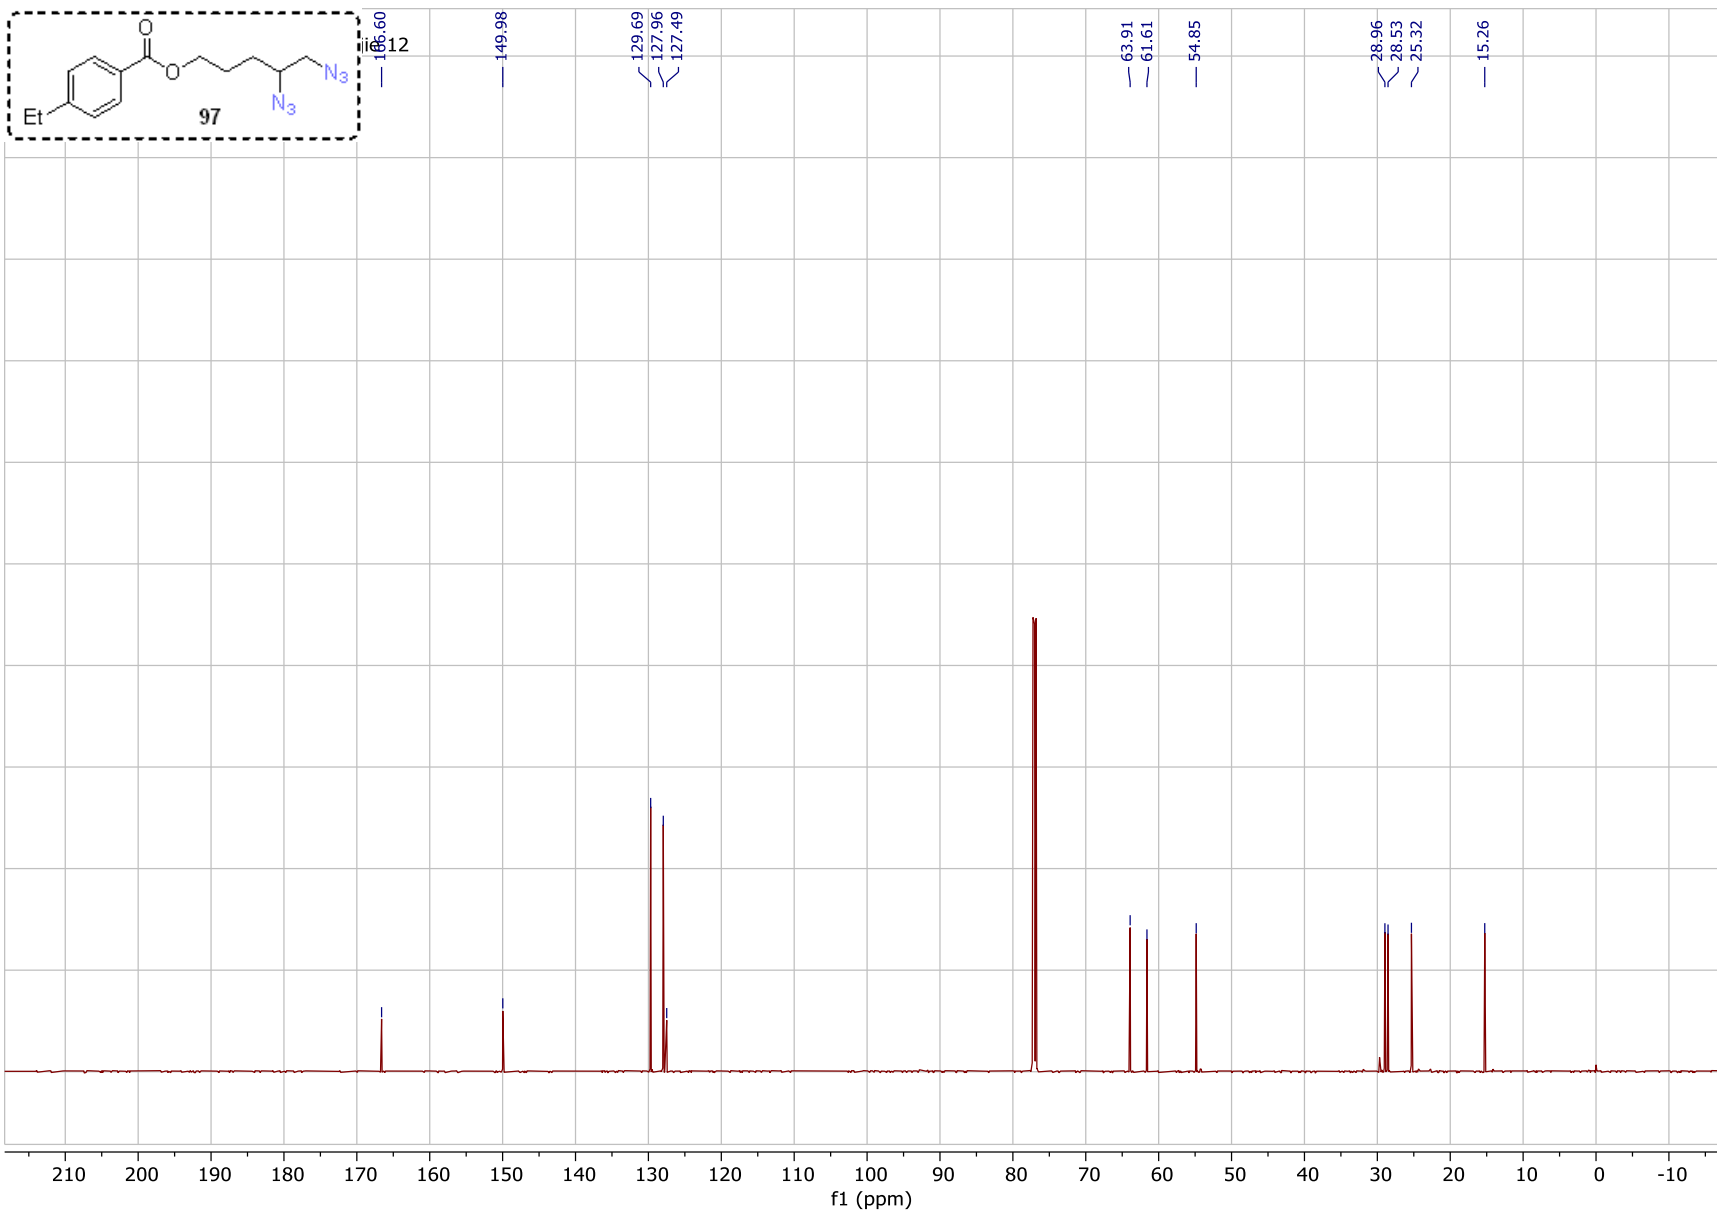

## IX. References

- [1] Nikitas, N. F.; Voutyritsa, E.; Gkizis, P. L.; Kokotos, C. G. *Eur. J. Org. Chem.* **2021**, 2021, 96.
- [2] Liu, J.; Lu, C.; Wu, S.; Wu, X.; Wu, Z.; Xue, X.-S.; Yu, J.; Zhu, C. *Angew. Chem. Int. Ed.* **2020**, 59, 8195.
- [3] Jiang, H.-J.; Liu, K.; Yu, J.; Zhang, L.; Gong, L.-Z. *Angew. Chem. Int. Ed.* **2017**, 56, 11931.
- [4] C. Almansa, J. Alfón, A. F. de Arriba, F. L. Cavalcanti, I. Escamilla, L. A. Gómez, et al. *J. Med. Chem.* **2003**, 46, 3463.
- [5] Aldrich, C.; Brody, S.; Cushman, M.; Fan, B.-Z.; Hiasa, H.; Liang, J.-H.; Lv, W.; Yang, Z.-Y. *Eur. J. Med. Chem.* **2020**, 193, 112222.
- [6] Bian, K.-J.; Kao, S.-C.; Nemoto, D.; Chen, X.-W.; West, J. G. *Nature Communications* **2022**, 13 (1), 7881.
- [7] Scheurer, A.; Mosset, P.; Saalfrank, R. W. *Tetrahedron: Asymmetry* **1997**, 8 (8), 1243-1251.
- [8] Siu, J. C.; Parry, J. B.; Lin, S. *Journal of the American Chemical Society* **2019**, 141 (7), 2825-2831.
- [9] Peng, H.; Yuan, Z.; Chen, P.; Liu, G. *Chinese Journal of Chemistry* **2017**, 35 (6), 876-880.
- [10] Fumagalli, G.; Rabet, P. T. G.; Boyd, S.; Greaney, M. F. *Angewandte Chemie International Edition* **2015**, 54 (39), 11481-11484.
- [11] Ho, M. L.; Flynn, A. B.; Ogilvie, W. W. *The Journal of Organic Chemistry* **2007**, 72 (3), 977.
- [12] Kamada, Y.; Kitamura, Y.; Tanaka, T.; Yoshimitsu, T. *Organic & Biomolecular Chemistry* **2013**, 11 (10), 1598.
- [13] Fu, N.; Sauer, G. S.; Lin, S. *Journal of the American Chemical Society* **2017**, 139 (43), 15548.
- [14] Tan, E. W.; Chan, B.; Blackman, A. G. *Journal of the American Chemical Society* **2002**, 124 (10), 2078-2079.
- [15] Xia, J.-B.; Zhu, C.; Chen, C. *Journal of the American Chemical Society* **2013**, 135 (46), 17494.
